# Supplementary material for: A proteome-wide genetic investigation identifies several SARS-CoV-2-exploited host targets of clinical relevance
Source: eLife. 2021 Aug 17;10:e69719. doi: 10.7554/eLife.69719 (PMC8457835; doi:10.7554/eLife.69719)
Supplement: Supplementary file 1. [file elife-69719-supp1.xlsx]

## Sheet: Sheet1
Definitions of COVID cases and controls
COVID phenotype	Case definition	Control definition
VERY SEVERE RESPIRATORY CONFIRMED COVID (A)
A1	Hospitalized laboratory confirmed SARS-CoV-2 infection (RNA and/or serology based), AND (death OR respiratory support (intubation, CPAP, BiPAP, CNP (continue external negative pressure), Optiflow/very high flow Positive End Expiratory Pressure Oxygen AND hospitalization with COVID19 as primary reason for admission.	Laboratory confirmed SARS-CoV-2 infection (RNA and/or serology based) AND not hospitalised 21 days after the test.
A2	Hospitalized laboratory confirmed SARS-CoV-2 infection (RNA and/or serology based), AND (death OR respiratory support (intubation, CPAP, BiPAP, CNP (continue external negative pressure), Optiflow/very high flow Positive End Expiratory Pressure Oxygen AND hospitalization with COVID19 as primary reason for admission.	everybody that is not a case, e.g. population
HOSPITALIZED LAB CONFIRMED COVID (B)
B1	Hospitalized laboratory confirmed SARS-CoV-2 infection (RNA and/or serology based), hospitalization due to corona-related symptoms.	Laboratory confirmed SARS-CoV-2 infection (RNA and/or serology based) AND not hospitalised 21 days after the test.
B2	Hospitalized laboratory confirmed SARS-CoV-2 infection (RNA and/or serology based), hospitalization due to corona-related symptoms.	everybody that is not a case, e.g. population
PARTIAL-SUSCEPTIBILITY (C)
C1	Individuals with laboratory confirmation of SARS-CoV-2 infection (RNA and/or serology based) OR EHR/ICD coding/ Physician Confirmed COVID-19 OR self-reported COVID-19 positive (e.g. by questionnaire)	Laboratory tested for SARS-CoV-2 infection (RNA and/or serology based) AND all tests (if multiple tests) negative) OR self-reported tested negative for SARS-CoV-2 infection (e.g. by questionnaire)
C2	Individuals with laboratory confirmation of SARS-CoV-2 infection (RNA and/or serology based) OR EHR/ICD coding/ Physician Confirmed COVID-19 OR self-reported COVID-19 positive (e.g. by questionnaire)	everybody that is not a case, e.g. population
COVID-19 PREDICTED FROM SELF-REPORTED SYMPTOMS (D)
D1	Samples with a value from the predictive model* > -0.44 OR self-reported COVID-19 positive. *The model from Menni et al. 2020, minus age and sex predictors, will be applied to self-report data. The published model is as follows: Predictionmodel=−1.32+(1.75×lossofsmellandtaste)+(0.31×severeorsignificantpersistentcough)+(0.49×severefatigue)+(0.39×skippedmeals) where all symptoms are coded as 1 if t…	Samples with the minimum possible value from the predictive model (i.e., value from the predictive model = -1.32) AND NOT self-reported COVID-19 positive
Source	https://docs.google.com/document/d/1okamrqYmJfa35ClLvCt_vEe4PkvrTwggHq7T3jbeyCI/edit
