# Supplementary material for: A proteome-wide genetic investigation identifies several SARS-CoV-2-exploited host targets of clinical relevance
Source: eLife. 2021 Aug 17;10:e69719. doi: 10.7554/eLife.69719 (PMC8457835; doi:10.7554/eLife.69719)
Supplement: Supplementary file 2. [file elife-69719-supp2.xlsx]

## Sheet: Sheet1
Summary of pan-MR associations by their cis-trans status
probe	cis	trans	fdr
ABO_9253	93	NA	Yes
ADGRF5_6409	5	9	Yes
AMICA1_8232	79	NA	No
ASPN_6451	10	NA	No
C4A_C4B_4481	20	6	No		Legend
C5orf38_6378	NA	23	No		probe	Protein probe reported in Table S2
CAMK1_3592	NA	32	No		cis	number of trans-acting SNPs supporting the association of the protein with a COVID outcome
CBLN1_9313	15	NA	No		tran	number of cis-acting SNPs supporting the association of the protein with a COVID outcome
CBR3_14091	12	NA	No		fdr	Whether the protein-COVID association was sigificant at 5% FDR
CD209_3029	8	45	Yes
CD33_3166	16	NA	No
CFB_4129	9	1	No
CPA4_9267	20	NA	No
CRISP2_9282	11	2	No
CTF1_13732	NA	22	No
DEFB119_13455	NA	26	No
DHX8_11601	NA	60	No
ERAP2_8960	24	NA	No
FAM3D_13102	8	44	Yes
FCGR2A_3309	35	NA	No
FCGR2B_3310	65	NA	No
FUT3_4548_4	50	2	No
FUT5_4549_78	12	NA	No
FUT8_8244_16	15	1	No
GPC5_4991_12	11	NA	No
GRN_4992_49	1	11	No
HLA_DQA2_7757_5	9	4	No
ICAM1_4342_10	71	1	Yes
ICAM5_8245_27	17	4	No
IDUA_3169_70	14	2	No
IL17RA_2992_59	12	NA	No
IL1RAP_14048_7	16	NA	No
IL1RAP_2630_12	17	NA	No
IL27RA_5132_71	11	1	No
IL6R_4139_71	62	NA	No
IL6R_8092_29	62	NA	Yes
LCT_9017_58	51	20	No
LRPAP1_3640_14	1	19	No
MANEA_8014_359	13	NA	No
MMP8_2954_56	NA	61	No
NQO1_9837_60	27	NA	No
PDGFRB_3459_49_2	19	NA	No
PDGFRL_9713_67_3	NA	26	No
PLA2G2A_2692_74_2	13	NA	No
PLXNB2_9216_100_3	10	1	No
POFUT2_6042_52_3	NA	10	No
PSG4_5649_83_3	13	1	No
QSOX2_8397_147_3	16	63	Yes
RPN1_6458_6_3	NA	19	No
SELE_3470_1_2	NA	60	Yes
SELL_4831_4_2	7	3	No
SELP_4154_57_2	7	4	No
SEMA3E_5363_51_3	19	NA	No
SIGLEC14_8248_222_3	19	NA	No
ST3GAL6_6947_4_3	20	2	No
TCN2_5584_21_3	18	3	No
TIE1_2844_53_2	2	18	Yes
TXNDC12_4815_25_3	NA	27	No
USP25_9215_117_3	NA	18	No
VTN_13125_45_3	27	1	No
