# Supplementary material for: A proteome-wide genetic investigation identifies several SARS-CoV-2-exploited host targets of clinical relevance
Source: eLife. 2021 Aug 17;10:e69719. doi: 10.7554/eLife.69719 (PMC8457835; doi:10.7554/eLife.69719)
Supplement: Supplementary file 3. [file elife-69719-supp3.xlsx]

## Sheet: Sheet1
pan-Mendelian randomization (bxy_p < 0.05)
snp	rsid	probe	outcome	nsnps	bxy	bxy_se	bxy_p	fdr_bxy_p	bzx	bzx_se	bzx_pval	bzy	bzy_se	bzy_pval	cistrans	transgene	cis-eqtl	missense
9:133203795:G:A	rs11244033	ABO_9253	COVID_A2	23	0.128816	0.0299982	1.75369e-05	0.00211038	0.3777	0.0258	1.5714e-48	0.029515	0.038855	0.447482	cis		Yes	downstream_gene_variant
9:133205125:A:C	rs149189328	ABO_9253	COVID_A2	23	0.128816	0.0299982	1.75369e-05	0.00211038	0.8224	0.0863	1.57969e-21	0.13327	0.15111	0.377809	cis		Yes	downstream_gene_variant
9:133246236:C:T	rs145526382	ABO_9253	COVID_A2	23	0.128816	0.0299982	1.75369e-05	0.00211038	0.8842	0.0755	1.11611e-31	0.21526	0.10216	0.03511	cis		Yes	downstream_gene_variant
9:133319751:C:T	rs12683804	ABO_9253	COVID_A2	23	0.128816	0.0299982	1.75369e-05	0.00211038	-0.2884	0.029	2.65634e-23	0.010291	0.042433	0.808375	cis		Yes	downstream_gene_variant
9:133321580:C:T	rs79518626	ABO_9253	COVID_A2	23	0.128816	0.0299982	1.75369e-05	0.00211038	0.7864	0.0566	6.88856e-44	0.065888	0.078672	0.40231	cis		Yes	downstream_gene_variant		Legend
9:133302794:G:A	rs4962127	QSOX2_8397_147_3	COVID_A2	19	0.169655	0.0401147	2.34487e-05	0.00211038	-0.3566	0.0596	2.18767e-09	-0.071694	0.063682	0.260245	trans	ABO	Yes	downstream_gene_variant		snp	snp used to genetically represent protein probe in the format chr:pos:ref:alt, with position from GRCh38 build
9:133509774:G:A	rs28463601	QSOX2_8397_147_3	COVID_A2	19	0.169655	0.0401147	2.34487e-05	0.00211038	0.2935	0.0448	5.70233e-11	0.072011	0.075489	0.340121	trans	ABO	Yes	downstream_gene_variant		probe	protein probe used by SomaLogic to quantify protein abundance
9:133203795:G:A	rs11244033	ABO_9253	COVID_B2	23	0.128816	0.0299982	1.75369e-05	0.00211038	0.3777	0.0258	1.5714e-48	0.0042721	0.026197	0.870459	cis		Yes	downstream_gene_variant		outcome	COVID outcome (for definitions, see COVID_definitions)
9:133205125:A:C	rs149189328	ABO_9253	COVID_B2	23	0.128816	0.0299982	1.75369e-05	0.00211038	0.8224	0.0863	1.57969e-21	0.15158	0.099986	0.129516	cis		Yes	downstream_gene_variant		nsnps	Number of SNPs used as cis-acting instruments for each protein probe
9:133246236:C:T	rs145526382	ABO_9253	COVID_B2	23	0.128816	0.0299982	1.75369e-05	0.00211038	0.8842	0.0755	1.11611e-31	0.11228	0.072811	0.123055	cis		Yes	downstream_gene_variant		bxy	log odds ratio of outcome per SD of genetically predicted protein probe
9:133319751:C:T	rs12683804	ABO_9253	COVID_B2	23	0.128816	0.0299982	1.75369e-05	0.00211038	-0.2884	0.029	2.65634e-23	-0.032874	0.029223	0.260616	cis		Yes	downstream_gene_variant		bxy_se	standard error of bxy
9:133321580:C:T	rs79518626	ABO_9253	COVID_B2	23	0.128816	0.0299982	1.75369e-05	0.00211038	0.7864	0.0566	6.88856e-44	0.018647	0.049775	0.707939	cis		Yes	downstream_gene_variant		bxy_p	p-value of bxy
9:133326519:G:A	rs76771223	ABO_9253	COVID_B2	23	0.128816	0.0299982	1.75369e-05	0.00211038	-0.3461	0.0405	1.27783e-17	0.034758	0.078508	0.65796	cis		Yes	downstream_gene_variant		fdr	fdr-corrected p-value of bxy for each outcome
9:133302794:G:A	rs4962127	QSOX2_8397_147_3	COVID_B2	19	0.169655	0.0401147	2.34487e-05	0.00211038	-0.3566	0.0596	2.18767e-09	-0.034428	0.044062	0.434595	trans	ABO	Yes	downstream_gene_variant		bzx	Estimate of the association between snp and protein probe
9:133326519:G:A	rs76771223	QSOX2_8397_147_3	COVID_B2	19	0.169655	0.0401147	2.34487e-05	0.00211038	-0.254	0.0407	4.35377e-10	0.034758	0.078508	0.65796	trans	ADAMTS13	Yes	downstream_gene_variant		bzx_se	standard error of bzx
9:133509774:G:A	rs28463601	QSOX2_8397_147_3	COVID_B2	19	0.169655	0.0401147	2.34487e-05	0.00211038	0.2935	0.0448	5.70233e-11	0.097025	0.051338	0.0587679	trans	ABO	Yes	downstream_gene_variant		bzx_pval	p-value of bzx
9:133203795:G:A	rs11244033	ABO_9253	COVID_C1	23	0.128816	0.0299982	1.75369e-05	0.00211038	0.3777	0.0258	1.5714e-48	-0.0011904	0.016793	0.943488	cis		Yes	downstream_gene_variant		bzy	Estimate of the association between snp and outcome
9:133205125:A:C	rs149189328	ABO_9253	COVID_C1	23	0.128816	0.0299982	1.75369e-05	0.00211038	0.8224	0.0863	1.57969e-21	0.016747	0.063063	0.790578	cis		Yes	downstream_gene_variant		bzy_se	standard error of bzy
9:133246236:C:T	rs145526382	ABO_9253	COVID_C1	23	0.128816	0.0299982	1.75369e-05	0.00211038	0.8842	0.0755	1.11611e-31	0.066913	0.052247	0.200297	cis		Yes	downstream_gene_variant		bzy_pval	p-value of bzy
9:133319751:C:T	rs12683804	ABO_9253	COVID_C1	23	0.128816	0.0299982	1.75369e-05	0.00211038	-0.2884	0.029	2.65634e-23	-0.0017843	0.019779	0.928119	cis		Yes	downstream_gene_variant		cistrans	whether snp is cis-acting with respect to protein probe
9:133321580:C:T	rs79518626	ABO_9253	COVID_C1	23	0.128816	0.0299982	1.75369e-05	0.00211038	0.7864	0.0566	6.88856e-44	0.046483	0.032485	0.152457	cis		Yes	downstream_gene_variant		transgene	if snp is trans-acting to protein protein probe, the gene with the higher V2G score from Open Targets Genetics portal linked to the variant
9:133326519:G:A	rs76771223	ABO_9253	COVID_C1	23	0.128816	0.0299982	1.75369e-05	0.00211038	-0.3461	0.0405	1.27783e-17	-0.075292	0.04626	0.103613	cis		Yes	downstream_gene_variant		cis-eqtl	whether snp has effect on gene expression in any tissues assessed in the Open Targets Genetics Portal
9:133302794:G:A	rs4962127	QSOX2_8397_147_3	COVID_C1	19	0.169655	0.0401147	2.34487e-05	0.00211038	-0.3566	0.0596	2.18767e-09	0.023517	0.031713	0.458356	trans	ABO	Yes	downstream_gene_variant		missense	whether snp is a missense variant
9:133326519:G:A	rs76771223	QSOX2_8397_147_3	COVID_C1	19	0.169655	0.0401147	2.34487e-05	0.00211038	-0.254	0.0407	4.35377e-10	-0.075292	0.04626	0.103613	trans	ADAMTS13	Yes	downstream_gene_variant
9:133509774:G:A	rs28463601	QSOX2_8397_147_3	COVID_C1	19	0.169655	0.0401147	2.34487e-05	0.00211038	0.2935	0.0448	5.70233e-11	0.10124	0.033732	0.00268826	trans	ABO	Yes	downstream_gene_variant
9:133203795:G:A	rs11244033	ABO_9253	COVID_C2	23	0.128816	0.0299982	1.75369e-05	0.00211038	0.3777	0.0258	1.5714e-48	0.006862	0.014464	0.635201	cis		Yes	downstream_gene_variant
9:133205125:A:C	rs149189328	ABO_9253	COVID_C2	23	0.128816	0.0299982	1.75369e-05	0.00211038	0.8224	0.0863	1.57969e-21	0.02605	0.056149	0.642688	cis		Yes	downstream_gene_variant
9:133246236:C:T	rs145526382	ABO_9253	COVID_C2	23	0.128816	0.0299982	1.75369e-05	0.00211038	0.8842	0.0755	1.11611e-31	0.045655	0.043151	0.290042	cis		Yes	downstream_gene_variant
9:133319751:C:T	rs12683804	ABO_9253	COVID_C2	23	0.128816	0.0299982	1.75369e-05	0.00211038	-0.2884	0.029	2.65634e-23	-0.012525	0.016598	0.450484	cis		Yes	downstream_gene_variant
9:133321580:C:T	rs79518626	ABO_9253	COVID_C2	23	0.128816	0.0299982	1.75369e-05	0.00211038	0.7864	0.0566	6.88856e-44	0.044218	0.027714	0.110598	cis		Yes	downstream_gene_variant
9:133326519:G:A	rs76771223	ABO_9253	COVID_C2	23	0.128816	0.0299982	1.75369e-05	0.00211038	-0.3461	0.0405	1.27783e-17	0.01158	0.040116	0.772839	cis		Yes	downstream_gene_variant
9:133302794:G:A	rs4962127	QSOX2_8397_147_3	COVID_C2	19	0.169655	0.0401147	2.34487e-05	0.00211038	-0.3566	0.0596	2.18767e-09	-0.0076892	0.026535	0.771988	trans	ABO	Yes	downstream_gene_variant
9:133326519:G:A	rs76771223	QSOX2_8397_147_3	COVID_C2	19	0.169655	0.0401147	2.34487e-05	0.00211038	-0.254	0.0407	4.35377e-10	0.01158	0.040116	0.772839	trans	ADAMTS13	Yes	downstream_gene_variant
9:133509774:G:A	rs28463601	QSOX2_8397_147_3	COVID_C2	19	0.169655	0.0401147	2.34487e-05	0.00211038	0.2935	0.0448	5.70233e-11	0.067744	0.027503	0.0137722	trans	ABO	Yes	downstream_gene_variant
9:133183922:G:A	rs60526253	ABO_9253	COVID_A2	23	0.128816	0.0299982	1.75369e-05	0.00211038	-0.3173	0.0372	1.46893e-17	-0.031379	0.04354	0.471098	cis		Yes	intergenic_variant
9:133291776:AG:A	rs199659153	ABO_9253	COVID_A2	23	0.128816	0.0299982	1.75369e-05	0.00211038	-0.455	0.0724	3.28846e-10	-0.069795	0.11763	0.552951	cis		Yes	intergenic_variant
9:133294153:A:C	rs116851371	ABO_9253	COVID_A2	23	0.128816	0.0299982	1.75369e-05	0.00211038	1.0094	0.1733	5.72558e-09	0.16303	0.25275	0.518911	cis		Yes	intergenic_variant
9:133295160:G:A	rs7869258	ABO_9253	COVID_A2	23	0.128816	0.0299982	1.75369e-05	0.00211038	0.4292	0.0246	3.61814e-68	0.12101	0.037613	0.00129431	cis		Yes	intergenic_variant
9:133172006:A:G	rs2039184	QSOX2_8397_147_3	COVID_A2	19	0.169655	0.0401147	2.34487e-05	0.00211038	0.1642	0.0252	7.22681e-11	0.016553	0.027381	0.545482	trans	ABO	Yes	intergenic_variant
9:133294153:A:C	rs116851371	QSOX2_8397_147_3	COVID_A2	19	0.169655	0.0401147	2.34487e-05	0.00211038	1.043	0.1732	1.72339e-09	0.16303	0.25275	0.518911	trans	ABO	Yes	intergenic_variant
9:133295160:G:A	rs7869258	QSOX2_8397_147_3	COVID_A2	19	0.169655	0.0401147	2.34487e-05	0.00211038	0.2997	0.0252	1.2892e-32	0.12101	0.037613	0.00129431	trans	ABO	Yes	intergenic_variant
9:136259042:A:C	rs34514016	QSOX2_8397_147_3	COVID_A2	19	0.169655	0.0401147	2.34487e-05	0.00211038	-0.1438	0.0249	7.69072e-09	0.012401	0.040713	0.760674	cis		Yes	intergenic_variant
9:133183922:G:A	rs60526253	ABO_9253	COVID_B2	23	0.128816	0.0299982	1.75369e-05	0.00211038	-0.3173	0.0372	1.46893e-17	-0.042701	0.033338	0.200246	cis		Yes	intergenic_variant
9:133291776:AG:A	rs199659153	ABO_9253	COVID_B2	23	0.128816	0.0299982	1.75369e-05	0.00211038	-0.455	0.0724	3.28846e-10	-0.077908	0.084513	0.356609	cis		Yes	intergenic_variant
9:133294153:A:C	rs116851371	ABO_9253	COVID_B2	23	0.128816	0.0299982	1.75369e-05	0.00211038	1.0094	0.1733	5.72558e-09	-0.077737	0.25708	0.762359	cis		Yes	intergenic_variant
9:133295160:G:A	rs7869258	ABO_9253	COVID_B2	23	0.128816	0.0299982	1.75369e-05	0.00211038	0.4292	0.0246	3.61814e-68	0.067615	0.024378	0.00554385	cis		Yes	intergenic_variant
9:133172006:A:G	rs2039184	QSOX2_8397_147_3	COVID_B2	19	0.169655	0.0401147	2.34487e-05	0.00211038	0.1642	0.0252	7.22681e-11	0.011547	0.02067	0.57641	trans	ABO	Yes	intergenic_variant
9:133294153:A:C	rs116851371	QSOX2_8397_147_3	COVID_B2	19	0.169655	0.0401147	2.34487e-05	0.00211038	1.043	0.1732	1.72339e-09	-0.077737	0.25708	0.762359	trans	ABO	Yes	intergenic_variant
9:133295160:G:A	rs7869258	QSOX2_8397_147_3	COVID_B2	19	0.169655	0.0401147	2.34487e-05	0.00211038	0.2997	0.0252	1.2892e-32	0.067615	0.024378	0.00554385	trans	ABO	Yes	intergenic_variant
9:136259042:A:C	rs34514016	QSOX2_8397_147_3	COVID_B2	19	0.169655	0.0401147	2.34487e-05	0.00211038	-0.1438	0.0249	7.69072e-09	0.023964	0.025611	0.349432	cis		Yes	intergenic_variant
9:133183922:G:A	rs60526253	ABO_9253	COVID_C1	23	0.128816	0.0299982	1.75369e-05	0.00211038	-0.3173	0.0372	1.46893e-17	-0.051159	0.025325	0.0433731	cis		Yes	intergenic_variant
9:133291776:AG:A	rs199659153	ABO_9253	COVID_C1	23	0.128816	0.0299982	1.75369e-05	0.00211038	-0.455	0.0724	3.28846e-10	-0.015379	0.065715	0.814965	cis		Yes	intergenic_variant
9:133294153:A:C	rs116851371	ABO_9253	COVID_C1	23	0.128816	0.0299982	1.75369e-05	0.00211038	1.0094	0.1733	5.72558e-09	-0.24456	0.28096	0.384058	cis		Yes	intergenic_variant
9:133295160:G:A	rs7869258	ABO_9253	COVID_C1	23	0.128816	0.0299982	1.75369e-05	0.00211038	0.4292	0.0246	3.61814e-68	0.013494	0.016213	0.405242	cis		Yes	intergenic_variant
9:133172006:A:G	rs2039184	QSOX2_8397_147_3	COVID_C1	19	0.169655	0.0401147	2.34487e-05	0.00211038	0.1642	0.0252	7.22681e-11	-0.0080024	0.015514	0.605982	trans	ABO	Yes	intergenic_variant
9:133294153:A:C	rs116851371	QSOX2_8397_147_3	COVID_C1	19	0.169655	0.0401147	2.34487e-05	0.00211038	1.043	0.1732	1.72339e-09	-0.24456	0.28096	0.384058	trans	ABO	Yes	intergenic_variant
9:133295160:G:A	rs7869258	QSOX2_8397_147_3	COVID_C1	19	0.169655	0.0401147	2.34487e-05	0.00211038	0.2997	0.0252	1.2892e-32	0.013494	0.016213	0.405242	trans	ABO	Yes	intergenic_variant
9:136259042:A:C	rs34514016	QSOX2_8397_147_3	COVID_C1	19	0.169655	0.0401147	2.34487e-05	0.00211038	-0.1438	0.0249	7.69072e-09	-0.0048527	0.015743	0.757896	cis		Yes	intergenic_variant
9:133183922:G:A	rs60526253	ABO_9253	COVID_C2	23	0.128816	0.0299982	1.75369e-05	0.00211038	-0.3173	0.0372	1.46893e-17	-0.047066	0.020488	0.0216047	cis		Yes	intergenic_variant
9:133291776:AG:A	rs199659153	ABO_9253	COVID_C2	23	0.128816	0.0299982	1.75369e-05	0.00211038	-0.455	0.0724	3.28846e-10	-0.01367	0.054207	0.800901	cis		Yes	intergenic_variant
9:133294153:A:C	rs116851371	ABO_9253	COVID_C2	23	0.128816	0.0299982	1.75369e-05	0.00211038	1.0094	0.1733	5.72558e-09	-0.10667	0.15972	0.504225	cis		Yes	intergenic_variant
9:133295160:G:A	rs7869258	ABO_9253	COVID_C2	23	0.128816	0.0299982	1.75369e-05	0.00211038	0.4292	0.0246	3.61814e-68	0.017874	0.01375	0.193626	cis		Yes	intergenic_variant
9:133172006:A:G	rs2039184	QSOX2_8397_147_3	COVID_C2	19	0.169655	0.0401147	2.34487e-05	0.00211038	0.1642	0.0252	7.22681e-11	0.0034449	0.012628	0.785008	trans	ABO	Yes	intergenic_variant
9:133294153:A:C	rs116851371	QSOX2_8397_147_3	COVID_C2	19	0.169655	0.0401147	2.34487e-05	0.00211038	1.043	0.1732	1.72339e-09	-0.10667	0.15972	0.504225	trans	ABO	Yes	intergenic_variant
9:133295160:G:A	rs7869258	QSOX2_8397_147_3	COVID_C2	19	0.169655	0.0401147	2.34487e-05	0.00211038	0.2997	0.0252	1.2892e-32	0.017874	0.01375	0.193626	trans	ABO	Yes	intergenic_variant
9:136259042:A:C	rs34514016	QSOX2_8397_147_3	COVID_C2	19	0.169655	0.0401147	2.34487e-05	0.00211038	-0.1438	0.0249	7.69072e-09	-0.011049	0.013896	0.426543	cis		Yes	intergenic_variant
9:133156531:G:A	rs7027827	ABO_9253	COVID_A2	23	0.128816	0.0299982	1.75369e-05	0.00211038	0.2975	0.0308	4.49838e-22	0.12763	0.046684	0.00625866	cis		Yes	intron_variant
9:133318150:T:C	rs11791119	ABO_9253	COVID_A2	23	0.128816	0.0299982	1.75369e-05	0.00211038	-0.194	0.0263	1.62595e-13	0.011511	0.039544	0.77098	cis		Yes	intron_variant
9:133356757:CAGGGGAG:C	rs587680893	ABO_9253	COVID_A2	23	0.128816	0.0299982	1.75369e-05	0.00211038	0.898	0.0698	7.05405e-38	0.22221	0.11075	0.0448124	cis		Yes	intron_variant
9:133412734:G:A	rs2285488	ABO_9253	COVID_A2	23	0.128816	0.0299982	1.75369e-05	0.00211038	-0.3874	0.0313	3.48127e-35	-0.035596	0.049695	0.473813	cis		Yes	intron_variant
9:133517594:A:G	rs9802874	ABO_9253	COVID_A2	23	0.128816	0.0299982	1.75369e-05	0.00211038	-0.3243	0.0259	5.71387e-36	-0.067622	0.042876	0.11476	cis		Yes	intron_variant
9:133536945:G:T	rs28569945	ABO_9253	COVID_A2	23	0.128816	0.0299982	1.75369e-05	0.00211038	-0.3032	0.0308	7.26465e-23	-0.031981	0.047906	0.504403	cis		Yes	intron_variant
9:133263362:GCGCCCACCACTA:G	rs8176685	QSOX2_8397_147_3	COVID_A2	19	0.169655	0.0401147	2.34487e-05	0.00211038	0.9494	0.0279	8.39331e-254	0.1842	0.045813	5.80272e-05	trans	ABO	Yes	intron_variant
9:133435533:A:C	rs148336913	QSOX2_8397_147_3	COVID_A2	19	0.169655	0.0401147	2.34487e-05	0.00211038	0.4382	0.0667	5.04116e-11	0.10563	0.095005	0.266209	trans	ADAMTS13	Yes	intron_variant
9:133445896:G:A	rs652600	QSOX2_8397_147_3	COVID_A2	19	0.169655	0.0401147	2.34487e-05	0.00211038	0.2134	0.0273	5.41617e-15	0.061096	0.039837	0.125116	trans	ADAMTS13	Yes	intron_variant
9:133467311:C:G	rs141429199	QSOX2_8397_147_3	COVID_A2	19	0.169655	0.0401147	2.34487e-05	0.00211038	0.6996	0.0951	1.88842e-13	0.060957	0.12437	0.624045	trans	ABO	Yes	intron_variant
9:133519966:A:C	rs9330462	QSOX2_8397_147_3	COVID_A2	19	0.169655	0.0401147	2.34487e-05	0.00211038	-0.1466	0.0258	1.32996e-08	-0.092801	0.040811	0.0229707	trans	ABO	Yes	intron_variant
9:136213967:A:AAC	rs77836657	QSOX2_8397_147_3	COVID_A2	19	0.169655	0.0401147	2.34487e-05	0.00211038	-0.3556	0.0238	1.77808e-50	-0.067453	0.038254	0.0778511	cis		Yes	intron_variant
9:136216078:C:T	rs78554234	QSOX2_8397_147_3	COVID_A2	19	0.169655	0.0401147	2.34487e-05	0.00211038	-0.417	0.0725	8.83379e-09	-0.0018794	0.076061	0.980287	cis		Yes	intron_variant
9:136234349:G:T	rs113703846	QSOX2_8397_147_3	COVID_A2	19	0.169655	0.0401147	2.34487e-05	0.00211038	0.3625	0.0651	2.57153e-08	0.19185	0.11566	0.097168	cis		Yes	intron_variant
9:133156531:G:A	rs7027827	ABO_9253	COVID_B2	23	0.128816	0.0299982	1.75369e-05	0.00211038	0.2975	0.0308	4.49838e-22	0.085999	0.031936	0.00708432	cis		Yes	intron_variant
9:133356757:CAGGGGAG:C	rs587680893	ABO_9253	COVID_B2	23	0.128816	0.0299982	1.75369e-05	0.00211038	0.898	0.0698	7.05405e-38	0.12914	0.077905	0.0973861	cis		Yes	intron_variant
9:133412734:G:A	rs2285488	ABO_9253	COVID_B2	23	0.128816	0.0299982	1.75369e-05	0.00211038	-0.3874	0.0313	3.48127e-35	0.00097743	0.033768	0.976908	cis		Yes	intron_variant
9:133517594:A:G	rs9802874	ABO_9253	COVID_B2	23	0.128816	0.0299982	1.75369e-05	0.00211038	-0.3243	0.0259	5.71387e-36	-0.020331	0.029574	0.491792	cis		Yes	intron_variant
9:133536945:G:T	rs28569945	ABO_9253	COVID_B2	23	0.128816	0.0299982	1.75369e-05	0.00211038	-0.3032	0.0308	7.26465e-23	-0.021159	0.029571	0.47428	cis		Yes	intron_variant
9:133263362:GCGCCCACCACTA:G	rs8176685	QSOX2_8397_147_3	COVID_B2	19	0.169655	0.0401147	2.34487e-05	0.00211038	0.9494	0.0279	8.39331e-254	0.14659	0.032232	5.41672e-06	trans	ABO	Yes	intron_variant
9:133435533:A:C	rs148336913	QSOX2_8397_147_3	COVID_B2	19	0.169655	0.0401147	2.34487e-05	0.00211038	0.4382	0.0667	5.04116e-11	0.030522	0.062041	0.622744	trans	ADAMTS13	Yes	intron_variant
9:133445896:G:A	rs652600	QSOX2_8397_147_3	COVID_B2	19	0.169655	0.0401147	2.34487e-05	0.00211038	0.2134	0.0273	5.41617e-15	0.028227	0.025927	0.276282	trans	ADAMTS13	Yes	intron_variant
9:133467311:C:G	rs141429199	QSOX2_8397_147_3	COVID_B2	19	0.169655	0.0401147	2.34487e-05	0.00211038	0.6996	0.0951	1.88842e-13	0.040852	0.091572	0.655511	trans	ABO	Yes	intron_variant
9:133517847:C:T	rs9286381	QSOX2_8397_147_3	COVID_B2	19	0.169655	0.0401147	2.34487e-05	0.00211038	-0.5469	0.0635	7.14229e-18	-0.00599	0.064961	0.926532	trans	ABO	Yes	intron_variant
9:136213967:A:AAC	rs77836657	QSOX2_8397_147_3	COVID_B2	19	0.169655	0.0401147	2.34487e-05	0.00211038	-0.3556	0.0238	1.77808e-50	-0.011743	0.025798	0.648972	cis		Yes	intron_variant
9:136216078:C:T	rs78554234	QSOX2_8397_147_3	COVID_B2	19	0.169655	0.0401147	2.34487e-05	0.00211038	-0.417	0.0725	8.83379e-09	-0.046403	0.061178	0.448157	cis		Yes	intron_variant
9:136234349:G:T	rs113703846	QSOX2_8397_147_3	COVID_B2	19	0.169655	0.0401147	2.34487e-05	0.00211038	0.3625	0.0651	2.57153e-08	0.066571	0.077297	0.389108	cis		Yes	intron_variant
9:133156531:G:A	rs7027827	ABO_9253	COVID_C1	23	0.128816	0.0299982	1.75369e-05	0.00211038	0.2975	0.0308	4.49838e-22	0.045517	0.023537	0.0531317	cis		Yes	intron_variant
9:133356757:CAGGGGAG:C	rs587680893	ABO_9253	COVID_C1	23	0.128816	0.0299982	1.75369e-05	0.00211038	0.898	0.0698	7.05405e-38	-0.081648	0.080221	0.308779	cis		Yes	intron_variant
9:133412734:G:A	rs2285488	ABO_9253	COVID_C1	23	0.128816	0.0299982	1.75369e-05	0.00211038	-0.3874	0.0313	3.48127e-35	-0.033318	0.021908	0.128306	cis		Yes	intron_variant
9:133517594:A:G	rs9802874	ABO_9253	COVID_C1	23	0.128816	0.0299982	1.75369e-05	0.00211038	-0.3243	0.0259	5.71387e-36	0.003984	0.019615	0.839049	cis		Yes	intron_variant
9:133536945:G:T	rs28569945	ABO_9253	COVID_C1	23	0.128816	0.0299982	1.75369e-05	0.00211038	-0.3032	0.0308	7.26465e-23	-0.019525	0.018467	0.290379	cis		Yes	intron_variant
9:133263362:GCGCCCACCACTA:G	rs8176685	QSOX2_8397_147_3	COVID_C1	19	0.169655	0.0401147	2.34487e-05	0.00211038	0.9494	0.0279	8.39331e-254	0.07653	0.026548	0.00394279	trans	ABO	Yes	intron_variant
9:133435533:A:C	rs148336913	QSOX2_8397_147_3	COVID_C1	19	0.169655	0.0401147	2.34487e-05	0.00211038	0.4382	0.0667	5.04116e-11	0.085899	0.046184	0.0628955	trans	ADAMTS13	Yes	intron_variant
9:133445896:G:A	rs652600	QSOX2_8397_147_3	COVID_C1	19	0.169655	0.0401147	2.34487e-05	0.00211038	0.2134	0.0273	5.41617e-15	-0.01549	0.017519	0.376597	trans	ADAMTS13	Yes	intron_variant
9:133467311:C:G	rs141429199	QSOX2_8397_147_3	COVID_C1	19	0.169655	0.0401147	2.34487e-05	0.00211038	0.6996	0.0951	1.88842e-13	0.12584	0.06856	0.0664357	trans	ABO	Yes	intron_variant
9:133517847:C:T	rs9286381	QSOX2_8397_147_3	COVID_C1	19	0.169655	0.0401147	2.34487e-05	0.00211038	-0.5469	0.0635	7.14229e-18	0.033979	0.037364	0.363137	trans	ABO	Yes	intron_variant
9:136213967:A:AAC	rs77836657	QSOX2_8397_147_3	COVID_C1	19	0.169655	0.0401147	2.34487e-05	0.00211038	-0.3556	0.0238	1.77808e-50	-0.0043978	0.018624	0.813327	cis		Yes	intron_variant
9:136216078:C:T	rs78554234	QSOX2_8397_147_3	COVID_C1	19	0.169655	0.0401147	2.34487e-05	0.00211038	-0.417	0.0725	8.83379e-09	-0.029372	0.053145	0.580485	cis		Yes	intron_variant
9:136234349:G:T	rs113703846	QSOX2_8397_147_3	COVID_C1	19	0.169655	0.0401147	2.34487e-05	0.00211038	0.3625	0.0651	2.57153e-08	-0.025301	0.049268	0.607575	cis		Yes	intron_variant
9:133156531:G:A	rs7027827	ABO_9253	COVID_C2	23	0.128816	0.0299982	1.75369e-05	0.00211038	0.2975	0.0308	4.49838e-22	0.038534	0.019292	0.0457809	cis		Yes	intron_variant
9:133356757:CAGGGGAG:C	rs587680893	ABO_9253	COVID_C2	23	0.128816	0.0299982	1.75369e-05	0.00211038	0.898	0.0698	7.05405e-38	-0.029362	0.061076	0.630698	cis		Yes	intron_variant
9:133412734:G:A	rs2285488	ABO_9253	COVID_C2	23	0.128816	0.0299982	1.75369e-05	0.00211038	-0.3874	0.0313	3.48127e-35	-0.03327	0.018623	0.0740182	cis		Yes	intron_variant
9:133517594:A:G	rs9802874	ABO_9253	COVID_C2	23	0.128816	0.0299982	1.75369e-05	0.00211038	-0.3243	0.0259	5.71387e-36	5.356e-05	0.016118	0.997349	cis		Yes	intron_variant
9:133536945:G:T	rs28569945	ABO_9253	COVID_C2	23	0.128816	0.0299982	1.75369e-05	0.00211038	-0.3032	0.0308	7.26465e-23	-0.022149	0.01634	0.175256	cis		Yes	intron_variant
9:133263362:GCGCCCACCACTA:G	rs8176685	QSOX2_8397_147_3	COVID_C2	19	0.169655	0.0401147	2.34487e-05	0.00211038	0.9494	0.0279	8.39331e-254	0.08315	0.021549	0.000114016	trans	ABO	Yes	intron_variant
9:133435533:A:C	rs148336913	QSOX2_8397_147_3	COVID_C2	19	0.169655	0.0401147	2.34487e-05	0.00211038	0.4382	0.0667	5.04116e-11	0.052778	0.041096	0.199051	trans	ADAMTS13	Yes	intron_variant
9:133445896:G:A	rs652600	QSOX2_8397_147_3	COVID_C2	19	0.169655	0.0401147	2.34487e-05	0.00211038	0.2134	0.0273	5.41617e-15	-0.0067226	0.014831	0.650347	trans	ADAMTS13	Yes	intron_variant
9:133467311:C:G	rs141429199	QSOX2_8397_147_3	COVID_C2	19	0.169655	0.0401147	2.34487e-05	0.00211038	0.6996	0.0951	1.88842e-13	0.015662	0.054804	0.775045	trans	ABO	Yes	intron_variant
9:133517847:C:T	rs9286381	QSOX2_8397_147_3	COVID_C2	19	0.169655	0.0401147	2.34487e-05	0.00211038	-0.5469	0.0635	7.14229e-18	0.022871	0.033853	0.499296	trans	ABO	Yes	intron_variant
9:136213967:A:AAC	rs77836657	QSOX2_8397_147_3	COVID_C2	19	0.169655	0.0401147	2.34487e-05	0.00211038	-0.3556	0.0238	1.77808e-50	-0.006006	0.015359	0.695767	cis		Yes	intron_variant
9:136216078:C:T	rs78554234	QSOX2_8397_147_3	COVID_C2	19	0.169655	0.0401147	2.34487e-05	0.00211038	-0.417	0.0725	8.83379e-09	0.027034	0.040301	0.502347	cis		Yes	intron_variant
9:136234349:G:T	rs113703846	QSOX2_8397_147_3	COVID_C2	19	0.169655	0.0401147	2.34487e-05	0.00211038	0.3625	0.0651	2.57153e-08	-0.0058068	0.043501	0.893809	cis		Yes	intron_variant
9:133255963:G:T	rs8176744	ABO_9253	COVID_A2	23	0.128816	0.0299982	1.75369e-05	0.00211038	-0.5209	0.0598	3.01998e-18	-0.35203	0.10827	0.00114835	cis		Yes	non_coding_transcript_exon_variant
9:133257521:T:TC	rs8176719	ABO_9253	COVID_A2	23	0.128816	0.0299982	1.75369e-05	0.00211038	1.2044	0.0158	0	0.15094	0.038232	7.88063e-05	cis		Yes	frameshift_variant
9:133254995:G:A	rs117308290	QSOX2_8397_147_3	COVID_A2	19	0.169655	0.0401147	2.34487e-05	0.00211038	0.4816	0.0786	8.94242e-10	-0.086476	0.11965	0.469839	trans	ABO	Yes	non_coding_transcript_exon_variant
9:133255963:G:T	rs8176744	QSOX2_8397_147_3	COVID_A2	19	0.169655	0.0401147	2.34487e-05	0.00211038	-0.3509	0.0602	5.57927e-09	-0.35203	0.10827	0.00114835	trans	ABO	Yes	non_coding_transcript_exon_variant
9:133255963:G:T	rs8176744	ABO_9253	COVID_B2	23	0.128816	0.0299982	1.75369e-05	0.00211038	-0.5209	0.0598	3.01998e-18	-0.20303	0.077337	0.00865819	cis		Yes	non_coding_transcript_exon_variant
9:133257521:T:TC	rs8176719	ABO_9253	COVID_B2	23	0.128816	0.0299982	1.75369e-05	0.00211038	1.2044	0.0158	0	0.14495	0.025451	1.23186e-08	cis		Yes	frameshift_variant
9:133254995:G:A	rs117308290	QSOX2_8397_147_3	COVID_B2	19	0.169655	0.0401147	2.34487e-05	0.00211038	0.4816	0.0786	8.94242e-10	0.042605	0.081256	0.600049	trans	ABO	Yes	non_coding_transcript_exon_variant
9:133255963:G:T	rs8176744	QSOX2_8397_147_3	COVID_B2	19	0.169655	0.0401147	2.34487e-05	0.00211038	-0.3509	0.0602	5.57927e-09	-0.20303	0.077337	0.00865819	trans	ABO	Yes	non_coding_transcript_exon_variant
9:133255963:G:T	rs8176744	ABO_9253	COVID_C1	23	0.128816	0.0299982	1.75369e-05	0.00211038	-0.5209	0.0598	3.01998e-18	-0.071308	0.048605	0.142351	cis		Yes	non_coding_transcript_exon_variant
9:133257521:T:TC	rs8176719	ABO_9253	COVID_C1	23	0.128816	0.0299982	1.75369e-05	0.00211038	1.2044	0.0158	0	0.091631	0.018929	1.29335e-06	cis		Yes	frameshift_variant
9:133254995:G:A	rs117308290	QSOX2_8397_147_3	COVID_C1	19	0.169655	0.0401147	2.34487e-05	0.00211038	0.4816	0.0786	8.94242e-10	0.082251	0.054705	0.132701	trans	ABO	Yes	non_coding_transcript_exon_variant
9:133255963:G:T	rs8176744	QSOX2_8397_147_3	COVID_C1	19	0.169655	0.0401147	2.34487e-05	0.00211038	-0.3509	0.0602	5.57927e-09	-0.071308	0.048605	0.142351	trans	ABO	Yes	non_coding_transcript_exon_variant
9:133255963:G:T	rs8176744	ABO_9253	COVID_C2	23	0.128816	0.0299982	1.75369e-05	0.00211038	-0.5209	0.0598	3.01998e-18	-0.06667	0.040761	0.101917	cis		Yes	non_coding_transcript_exon_variant
9:133257521:T:TC	rs8176719	ABO_9253	COVID_C2	23	0.128816	0.0299982	1.75369e-05	0.00211038	1.2044	0.0158	0	0.10032	0.015491	9.41746e-11	cis		Yes	frameshift_variant
9:133254995:G:A	rs117308290	QSOX2_8397_147_3	COVID_C2	19	0.169655	0.0401147	2.34487e-05	0.00211038	0.4816	0.0786	8.94242e-10	0.077511	0.048682	0.111342	trans	ABO	Yes	non_coding_transcript_exon_variant
9:133255963:G:T	rs8176744	QSOX2_8397_147_3	COVID_C2	19	0.169655	0.0401147	2.34487e-05	0.00211038	-0.3509	0.0602	5.57927e-09	-0.06667	0.040761	0.101917	trans	ABO	Yes	non_coding_transcript_exon_variant
9:133286683:T:C	rs68032997	ABO_9253	COVID_A2	23	0.128816	0.0299982	1.75369e-05	0.00211038	-0.4887	0.0626	5.87005e-15	-0.081896	0.089688	0.361179	cis		Yes	regulatory_region_variant
9:133280491:G:A	rs55988407	QSOX2_8397_147_3	COVID_A2	19	0.169655	0.0401147	2.34487e-05	0.00211038	-0.2934	0.0537	4.66345e-08	0.082963	0.087878	0.345134	trans	ABO	Yes	regulatory_region_variant
9:133286683:T:C	rs68032997	ABO_9253	COVID_B2	23	0.128816	0.0299982	1.75369e-05	0.00211038	-0.4887	0.0626	5.87005e-15	-0.028657	0.057499	0.618208	cis		Yes	regulatory_region_variant
9:133280491:G:A	rs55988407	QSOX2_8397_147_3	COVID_B2	19	0.169655	0.0401147	2.34487e-05	0.00211038	-0.2934	0.0537	4.66345e-08	0.048304	0.063269	0.445183	trans	ABO	Yes	regulatory_region_variant
9:133286683:T:C	rs68032997	ABO_9253	COVID_C1	23	0.128816	0.0299982	1.75369e-05	0.00211038	-0.4887	0.0626	5.87005e-15	0.032582	0.036413	0.370899	cis		Yes	regulatory_region_variant
9:133280491:G:A	rs55988407	QSOX2_8397_147_3	COVID_C1	19	0.169655	0.0401147	2.34487e-05	0.00211038	-0.2934	0.0537	4.66345e-08	0.0097609	0.044183	0.825155	trans	ABO	Yes	regulatory_region_variant
9:133286683:T:C	rs68032997	ABO_9253	COVID_C2	23	0.128816	0.0299982	1.75369e-05	0.00211038	-0.4887	0.0626	5.87005e-15	0.00080772	0.031738	0.979696	cis		Yes	regulatory_region_variant
9:133280491:G:A	rs55988407	QSOX2_8397_147_3	COVID_C2	19	0.169655	0.0401147	2.34487e-05	0.00211038	-0.2934	0.0537	4.66345e-08	0.0048431	0.036031	0.893075	trans	ABO	Yes	regulatory_region_variant
9:133341592:C:T	rs78711238	ABO_9253	COVID_A2	23	0.128816	0.0299982	1.75369e-05	0.00211038	1.149	0.1038	1.7665e-28	-0.050325	0.15913	0.751812	cis		Yes	synonymous_variant
9:133341592:C:T	rs78711238	ABO_9253	COVID_B2	23	0.128816	0.0299982	1.75369e-05	0.00211038	1.149	0.1038	1.7665e-28	0.11029	0.10991	0.31564	cis		Yes	synonymous_variant
9:133341592:C:T	rs78711238	ABO_9253	COVID_C1	23	0.128816	0.0299982	1.75369e-05	0.00211038	1.149	0.1038	1.7665e-28	0.035597	0.069934	0.610746	cis		Yes	synonymous_variant
9:133341592:C:T	rs78711238	ABO_9253	COVID_C2	23	0.128816	0.0299982	1.75369e-05	0.00211038	1.149	0.1038	1.7665e-28	0.058339	0.059952	0.330506	cis		Yes	synonymous_variant
9:133165340:C:G	rs9411461	ABO_9253	COVID_A2	23	0.128816	0.0299982	1.75369e-05	0.00211038	-0.1656	0.028	3.33319e-09	-0.056342	0.041496	0.174537	cis		Yes	upstream_gene_variant
9:133165512:C:A	rs7044834	ABO_9253	COVID_A2	23	0.128816	0.0299982	1.75369e-05	0.00211038	-0.2538	0.0385	4.33334e-11	-0.032105	0.052547	0.541215	cis		Yes	upstream_gene_variant
9:133211179:TG:T	rs782108791	ABO_9253	COVID_A2	23	0.128816	0.0299982	1.75369e-05	0.00211038	-0.3558	0.0418	1.71015e-17	0.0020774	0.066953	0.975247	cis		Yes	upstream_gene_variant
9:133482710:T:C	rs72779222	ABO_9253	COVID_A2	23	0.128816	0.0299982	1.75369e-05	0.00211038	-0.316	0.0514	7.85353e-10	-0.13392	0.086103	0.119864	cis		Yes	upstream_gene_variant
9:133167805:A:G	rs11244020	QSOX2_8397_147_3	COVID_A2	19	0.169655	0.0401147	2.34487e-05	0.00211038	0.1439	0.0258	2.43973e-08	-0.017832	0.02821	0.527311	trans	ABO	Yes	upstream_gene_variant
9:133214142:T:C	rs4454354	QSOX2_8397_147_3	COVID_A2	19	0.169655	0.0401147	2.34487e-05	0.00211038	0.187	0.0302	5.93856e-10	0.00086765	0.033508	0.979342	trans	OBP2B	Yes	upstream_gene_variant
9:133165340:C:G	rs9411461	ABO_9253	COVID_B2	23	0.128816	0.0299982	1.75369e-05	0.00211038	-0.1656	0.028	3.33319e-09	-0.027157	0.030049	0.366124	cis		Yes	upstream_gene_variant
9:133165512:C:A	rs7044834	ABO_9253	COVID_B2	23	0.128816	0.0299982	1.75369e-05	0.00211038	-0.2538	0.0385	4.33334e-11	-0.063047	0.038731	0.103564	cis		Yes	upstream_gene_variant
9:133211179:TG:T	rs782108791	ABO_9253	COVID_B2	23	0.128816	0.0299982	1.75369e-05	0.00211038	-0.3558	0.0418	1.71015e-17	0.028411	0.045643	0.533639	cis		Yes	upstream_gene_variant
9:133482710:T:C	rs72779222	ABO_9253	COVID_B2	23	0.128816	0.0299982	1.75369e-05	0.00211038	-0.316	0.0514	7.85353e-10	-0.044135	0.059682	0.459602	cis		Yes	upstream_gene_variant
9:133167805:A:G	rs11244020	QSOX2_8397_147_3	COVID_B2	19	0.169655	0.0401147	2.34487e-05	0.00211038	0.1439	0.0258	2.43973e-08	-0.033198	0.021351	0.119977	trans	ABO	Yes	upstream_gene_variant
9:133214142:T:C	rs4454354	QSOX2_8397_147_3	COVID_B2	19	0.169655	0.0401147	2.34487e-05	0.00211038	0.187	0.0302	5.93856e-10	-0.013688	0.025218	0.587277	trans	OBP2B	Yes	upstream_gene_variant
9:133165340:C:G	rs9411461	ABO_9253	COVID_C1	23	0.128816	0.0299982	1.75369e-05	0.00211038	-0.1656	0.028	3.33319e-09	0.012614	0.021904	0.564699	cis		Yes	upstream_gene_variant
9:133165512:C:A	rs7044834	ABO_9253	COVID_C1	23	0.128816	0.0299982	1.75369e-05	0.00211038	-0.2538	0.0385	4.33334e-11	-0.034208	0.025506	0.179864	cis		Yes	upstream_gene_variant
9:133211179:TG:T	rs782108791	ABO_9253	COVID_C1	23	0.128816	0.0299982	1.75369e-05	0.00211038	-0.3558	0.0418	1.71015e-17	0.0088114	0.032859	0.788578	cis		Yes	upstream_gene_variant
9:133479288:G:GC	rs11454477	ABO_9253	COVID_C1	23	0.128816	0.0299982	1.75369e-05	0.00211038	-0.8466	0.0565	9.33216e-51	-0.069483	0.05666	0.22008	cis		Yes	upstream_gene_variant
9:133482710:T:C	rs72779222	ABO_9253	COVID_C1	23	0.128816	0.0299982	1.75369e-05	0.00211038	-0.316	0.0514	7.85353e-10	0.022896	0.040365	0.570562	cis		Yes	upstream_gene_variant
9:133167805:A:G	rs11244020	QSOX2_8397_147_3	COVID_C1	19	0.169655	0.0401147	2.34487e-05	0.00211038	0.1439	0.0258	2.43973e-08	0.013868	0.016028	0.386909	trans	ABO	Yes	upstream_gene_variant
9:133214142:T:C	rs4454354	QSOX2_8397_147_3	COVID_C1	19	0.169655	0.0401147	2.34487e-05	0.00211038	0.187	0.0302	5.93856e-10	0.019406	0.019957	0.330856	trans	OBP2B	Yes	upstream_gene_variant
9:133165340:C:G	rs9411461	ABO_9253	COVID_C2	23	0.128816	0.0299982	1.75369e-05	0.00211038	-0.1656	0.028	3.33319e-09	0.012919	0.017345	0.456377	cis		Yes	upstream_gene_variant
9:133165512:C:A	rs7044834	ABO_9253	COVID_C2	23	0.128816	0.0299982	1.75369e-05	0.00211038	-0.2538	0.0385	4.33334e-11	-0.029758	0.021948	0.17515	cis		Yes	upstream_gene_variant
9:133211179:TG:T	rs782108791	ABO_9253	COVID_C2	23	0.128816	0.0299982	1.75369e-05	0.00211038	-0.3558	0.0418	1.71015e-17	-0.0042559	0.027092	0.875173	cis		Yes	upstream_gene_variant
9:133482710:T:C	rs72779222	ABO_9253	COVID_C2	23	0.128816	0.0299982	1.75369e-05	0.00211038	-0.316	0.0514	7.85353e-10	0.0075791	0.031634	0.81065	cis		Yes	upstream_gene_variant
9:133167805:A:G	rs11244020	QSOX2_8397_147_3	COVID_C2	19	0.169655	0.0401147	2.34487e-05	0.00211038	0.1439	0.0258	2.43973e-08	0.011791	0.013097	0.36797	trans	ABO	Yes	upstream_gene_variant
9:133214142:T:C	rs4454354	QSOX2_8397_147_3	COVID_C2	19	0.169655	0.0401147	2.34487e-05	0.00211038	0.187	0.0302	5.93856e-10	0.0033536	0.015638	0.830195	trans	OBP2B	Yes	upstream_gene_variant
9:133246236:C:T	rs145526382	CD209_3029	COVID_A2	13	0.177386	0.043436	4.42973e-05	0.00265784	0.5609	0.0764	2.11019e-13	0.21526	0.10216	0.03511	trans	ABO	Yes	downstream_gene_variant
9:133326035:G:A	rs10901263	CD209_3029	COVID_A2	13	0.177386	0.043436	4.42973e-05	0.00265784	0.2461	0.028	1.50514e-18	-0.032925	0.044149	0.455806	trans	ABO	Yes	downstream_gene_variant
9:133246236:C:T	rs145526382	CD209_3029	COVID_B2	13	0.177386	0.043436	4.42973e-05	0.00265784	0.5609	0.0764	2.11019e-13	0.11228	0.072811	0.123055	trans	ABO	Yes	downstream_gene_variant
9:133326035:G:A	rs10901263	CD209_3029	COVID_B2	13	0.177386	0.043436	4.42973e-05	0.00265784	0.2461	0.028	1.50514e-18	0.0077574	0.02918	0.790357	trans	ABO	Yes	downstream_gene_variant
9:133246236:C:T	rs145526382	CD209_3029	COVID_C1	13	0.177386	0.043436	4.42973e-05	0.00265784	0.5609	0.0764	2.11019e-13	0.066913	0.052247	0.200297	trans	ABO	Yes	downstream_gene_variant
9:133326035:G:A	rs10901263	CD209_3029	COVID_C1	13	0.177386	0.043436	4.42973e-05	0.00265784	0.2461	0.028	1.50514e-18	-0.0093469	0.018878	0.620514	trans	ABO	Yes	downstream_gene_variant
9:133246236:C:T	rs145526382	CD209_3029	COVID_C2	13	0.177386	0.043436	4.42973e-05	0.00265784	0.5609	0.0764	2.11019e-13	0.045655	0.043151	0.290042	trans	ABO	Yes	downstream_gene_variant
9:133326035:G:A	rs10901263	CD209_3029	COVID_C2	13	0.177386	0.043436	4.42973e-05	0.00265784	0.2461	0.028	1.50514e-18	-0.0068042	0.016146	0.673451	trans	ABO	Yes	downstream_gene_variant
19:7716130:T:C	rs4804224	CD209_3029	COVID_A2	13	0.177386	0.043436	4.42973e-05	0.00265784	-0.4031	0.0299	2.00692e-41	-0.024416	0.047356	0.606145	cis		Yes	intergenic_variant
9:133281560:G:A	rs558240	CD209_3029	COVID_A2	13	0.177386	0.043436	4.42973e-05	0.00265784	0.2603	0.0253	7.93727e-25	0.12437	0.036912	0.000753416	trans	ABO	Yes	intergenic_variant
19:7716791:T:TTCTGGGGGC	rs145827860	CD209_3029	COVID_B2	13	0.177386	0.043436	4.42973e-05	0.00265784	-0.4154	0.03	1.33254e-43	-0.019313	0.043894	0.659943	cis		Yes	intergenic_variant
9:133281560:G:A	rs558240	CD209_3029	COVID_B2	13	0.177386	0.043436	4.42973e-05	0.00265784	0.2603	0.0253	7.93727e-25	0.052292	0.024545	0.0331341	trans	ABO	Yes	intergenic_variant
9:133507593:T:C	rs10481811	CD209_3029	COVID_B2	13	0.177386	0.043436	4.42973e-05	0.00265784	-0.4767	0.0618	1.22325e-14	-0.014964	0.091188	0.869652	trans	ABO	Yes	intergenic_variant
19:7716791:T:TTCTGGGGGC	rs145827860	CD209_3029	COVID_C1	13	0.177386	0.043436	4.42973e-05	0.00265784	-0.4154	0.03	1.33254e-43	-0.0151	0.027627	0.584676	cis		Yes	intergenic_variant
9:133281560:G:A	rs558240	CD209_3029	COVID_C1	13	0.177386	0.043436	4.42973e-05	0.00265784	0.2603	0.0253	7.93727e-25	0.0027396	0.016221	0.865881	trans	ABO	Yes	intergenic_variant
19:7716791:T:TTCTGGGGGC	rs145827860	CD209_3029	COVID_C2	13	0.177386	0.043436	4.42973e-05	0.00265784	-0.4154	0.03	1.33254e-43	-0.0082294	0.023228	0.723123	cis		Yes	intergenic_variant
9:133281560:G:A	rs558240	CD209_3029	COVID_C2	13	0.177386	0.043436	4.42973e-05	0.00265784	0.2603	0.0253	7.93727e-25	0.010146	0.013796	0.462077	trans	ABO	Yes	intergenic_variant
9:133507593:T:C	rs10481811	CD209_3029	COVID_C2	13	0.177386	0.043436	4.42973e-05	0.00265784	-0.4767	0.0618	1.22325e-14	0.031018	0.042457	0.465039	trans	ABO	Yes	intergenic_variant
9:133318150:T:C	rs11791119	CD209_3029	COVID_A2	13	0.177386	0.043436	4.42973e-05	0.00265784	-0.2425	0.0261	1.52576e-20	0.011511	0.039544	0.77098	trans	SURF6	Yes	intron_variant
9:133356757:CAGGGGAG:C	rs587680893	CD209_3029	COVID_A2	13	0.177386	0.043436	4.42973e-05	0.00265784	0.5616	0.0709	2.35579e-15	0.22221	0.11075	0.0448124	trans	ABO	Yes	intron_variant
9:133381608:G:A	rs28632066	CD209_3029	COVID_A2	13	0.177386	0.043436	4.42973e-05	0.00265784	0.7193	0.0848	2.20764e-17	-0.085106	0.12578	0.498643	trans	ABO	Yes	intron_variant
9:133473065:A:C	rs3124762	CD209_3029	COVID_A2	13	0.177386	0.043436	4.42973e-05	0.00265784	-0.2644	0.0333	2.02279e-15	-0.085121	0.050534	0.0920985	trans	ABO	Yes	intron_variant
9:133517594:A:G	rs9802874	CD209_3029	COVID_A2	13	0.177386	0.043436	4.42973e-05	0.00265784	-0.1926	0.0263	2.42138e-13	-0.067622	0.042876	0.11476	trans	ABO	Yes	intron_variant
9:133538440:G:T	rs13283227	CD209_3029	COVID_A2	13	0.177386	0.043436	4.42973e-05	0.00265784	-0.2502	0.0357	2.41053e-12	-0.048389	0.056805	0.394301	trans	ABO	Yes	intron_variant
9:133318150:T:C	rs11791119	CD209_3029	COVID_B2	13	0.177386	0.043436	4.42973e-05	0.00265784	-0.2425	0.0261	1.52576e-20	-0.056668	0.026508	0.0325354	trans	SURF6	Yes	intron_variant
9:133356757:CAGGGGAG:C	rs587680893	CD209_3029	COVID_B2	13	0.177386	0.043436	4.42973e-05	0.00265784	0.5616	0.0709	2.35579e-15	0.12914	0.077905	0.0973861	trans	ABO	Yes	intron_variant
9:133381608:G:A	rs28632066	CD209_3029	COVID_B2	13	0.177386	0.043436	4.42973e-05	0.00265784	0.7193	0.0848	2.20764e-17	0.07651	0.087059	0.379494	trans	ABO	Yes	intron_variant
9:133473065:A:C	rs3124762	CD209_3029	COVID_B2	13	0.177386	0.043436	4.42973e-05	0.00265784	-0.2644	0.0333	2.02279e-15	-0.032579	0.033327	0.328294	trans	ABO	Yes	intron_variant
9:133538440:G:T	rs13283227	CD209_3029	COVID_B2	13	0.177386	0.043436	4.42973e-05	0.00265784	-0.2502	0.0357	2.41053e-12	-0.06473	0.037549	0.0847294	trans	ABO	Yes	intron_variant
9:133318150:T:C	rs11791119	CD209_3029	COVID_C1	13	0.177386	0.043436	4.42973e-05	0.00265784	-0.2425	0.0261	1.52576e-20	-0.043883	0.017694	0.0131343	trans	SURF6	Yes	intron_variant
9:133356757:CAGGGGAG:C	rs587680893	CD209_3029	COVID_C1	13	0.177386	0.043436	4.42973e-05	0.00265784	0.5616	0.0709	2.35579e-15	-0.081648	0.080221	0.308779	trans	ABO	Yes	intron_variant
9:133381608:G:A	rs28632066	CD209_3029	COVID_C1	13	0.177386	0.043436	4.42973e-05	0.00265784	0.7193	0.0848	2.20764e-17	0.068749	0.054558	0.20763	trans	ABO	Yes	intron_variant
9:133473065:A:C	rs3124762	CD209_3029	COVID_C1	13	0.177386	0.043436	4.42973e-05	0.00265784	-0.2644	0.0333	2.02279e-15	-0.018783	0.021473	0.381723	trans	ABO	Yes	intron_variant
9:133517594:A:G	rs9802874	CD209_3029	COVID_C1	13	0.177386	0.043436	4.42973e-05	0.00265784	-0.1926	0.0263	2.42138e-13	0.003984	0.019615	0.839049	trans	ABO	Yes	intron_variant
9:133538440:G:T	rs13283227	CD209_3029	COVID_C1	13	0.177386	0.043436	4.42973e-05	0.00265784	-0.2502	0.0357	2.41053e-12	-0.022894	0.024213	0.344391	trans	ABO	Yes	intron_variant
9:133318150:T:C	rs11791119	CD209_3029	COVID_C2	13	0.177386	0.043436	4.42973e-05	0.00265784	-0.2425	0.0261	1.52576e-20	-0.042783	0.015083	0.00456103	trans	SURF6	Yes	intron_variant
9:133356757:CAGGGGAG:C	rs587680893	CD209_3029	COVID_C2	13	0.177386	0.043436	4.42973e-05	0.00265784	0.5616	0.0709	2.35579e-15	-0.029362	0.061076	0.630698	trans	ABO	Yes	intron_variant
9:133381608:G:A	rs28632066	CD209_3029	COVID_C2	13	0.177386	0.043436	4.42973e-05	0.00265784	0.7193	0.0848	2.20764e-17	0.048343	0.044841	0.28099	trans	ABO	Yes	intron_variant
9:133473065:A:C	rs3124762	CD209_3029	COVID_C2	13	0.177386	0.043436	4.42973e-05	0.00265784	-0.2644	0.0333	2.02279e-15	-0.040265	0.018329	0.0280353	trans	ABO	Yes	intron_variant
9:133538440:G:T	rs13283227	CD209_3029	COVID_C2	13	0.177386	0.043436	4.42973e-05	0.00265784	-0.2502	0.0357	2.41053e-12	-0.030307	0.020562	0.1405	trans	ABO	Yes	intron_variant
9:133257521:T:TC	rs8176719	CD209_3029	COVID_A2	13	0.177386	0.043436	4.42973e-05	0.00265784	0.7728	0.0225	1.57942e-258	0.15094	0.038232	7.88063e-05	trans	ABO	Yes	frameshift_variant
9:133257521:T:TC	rs8176719	CD209_3029	COVID_B2	13	0.177386	0.043436	4.42973e-05	0.00265784	0.7728	0.0225	1.57942e-258	0.14495	0.025451	1.23186e-08	trans	ABO	Yes	frameshift_variant
9:133257521:T:TC	rs8176719	CD209_3029	COVID_C1	13	0.177386	0.043436	4.42973e-05	0.00265784	0.7728	0.0225	1.57942e-258	0.091631	0.018929	1.29335e-06	trans	ABO	Yes	frameshift_variant
9:133257521:T:TC	rs8176719	CD209_3029	COVID_C2	13	0.177386	0.043436	4.42973e-05	0.00265784	0.7728	0.0225	1.57942e-258	0.10032	0.015491	9.41746e-11	trans	ABO	Yes	frameshift_variant
19:7748691:T:A	rs7359874	CD209_3029	COVID_A2	13	0.177386	0.043436	4.42973e-05	0.00265784	0.234	0.025	7.97367e-21	0.040154	0.038048	0.291265	cis		Yes	upstream_gene_variant
9:133165599:T:C	rs7033492	CD209_3029	COVID_A2	13	0.177386	0.043436	4.42973e-05	0.00265784	0.1641	0.0271	1.40112e-09	0.019264	0.038635	0.61805	trans	ABO	Yes	upstream_gene_variant
19:7748691:T:A	rs7359874	CD209_3029	COVID_B2	13	0.177386	0.043436	4.42973e-05	0.00265784	0.234	0.025	7.97367e-21	0.012653	0.025934	0.625626	cis		Yes	upstream_gene_variant
9:133165599:T:C	rs7033492	CD209_3029	COVID_B2	13	0.177386	0.043436	4.42973e-05	0.00265784	0.1641	0.0271	1.40112e-09	-0.020375	0.027991	0.466667	trans	ABO	Yes	upstream_gene_variant
19:7748691:T:A	rs7359874	CD209_3029	COVID_C1	13	0.177386	0.043436	4.42973e-05	0.00265784	0.234	0.025	7.97367e-21	0.032876	0.017168	0.0554979	cis		Yes	upstream_gene_variant
9:133165599:T:C	rs7033492	CD209_3029	COVID_C1	13	0.177386	0.043436	4.42973e-05	0.00265784	0.1641	0.0271	1.40112e-09	-0.0037546	0.019349	0.84614	trans	ABO	Yes	upstream_gene_variant
9:133479288:G:GC	rs11454477	CD209_3029	COVID_C1	13	0.177386	0.043436	4.42973e-05	0.00265784	-0.5932	0.0575	5.93338e-25	-0.069483	0.05666	0.22008	trans	ABO	Yes	upstream_gene_variant
19:7748691:T:A	rs7359874	CD209_3029	COVID_C2	13	0.177386	0.043436	4.42973e-05	0.00265784	0.234	0.025	7.97367e-21	0.016983	0.01429	0.234655	cis		Yes	upstream_gene_variant
9:133165599:T:C	rs7033492	CD209_3029	COVID_C2	13	0.177386	0.043436	4.42973e-05	0.00265784	0.1641	0.0271	1.40112e-09	0.018935	0.015587	0.224445	trans	ABO	Yes	upstream_gene_variant
9:133200789:C:G	rs11795119	FAM3D_13102	COVID_A2	13	0.141865	0.0353804	6.07966e-05	0.00273585	0.3478	0.0481	4.80266e-13	0.014484	0.07561	0.848085	trans	ABO	Yes	downstream_gene_variant
9:133318693:A:G	rs567493	FAM3D_13102	COVID_A2	13	0.141865	0.0353804	6.07966e-05	0.00273585	0.1688	0.0276	9.59882e-10	-0.0040404	0.039874	0.919289	trans	ABO	Yes	downstream_gene_variant
9:133200789:C:G	rs11795119	FAM3D_13102	COVID_B2	13	0.141865	0.0353804	6.07966e-05	0.00273585	0.3478	0.0481	4.80266e-13	0.0074735	0.051066	0.883645	trans	ABO	Yes	downstream_gene_variant
9:133318693:A:G	rs567493	FAM3D_13102	COVID_B2	13	0.141865	0.0353804	6.07966e-05	0.00273585	0.1688	0.0276	9.59882e-10	-0.0099619	0.026027	0.701903	trans	ABO	Yes	downstream_gene_variant
9:133200789:C:G	rs11795119	FAM3D_13102	COVID_C1	13	0.141865	0.0353804	6.07966e-05	0.00273585	0.3478	0.0481	4.80266e-13	0.051281	0.032077	0.109891	trans	ABO	Yes	downstream_gene_variant
9:133318693:A:G	rs567493	FAM3D_13102	COVID_C1	13	0.141865	0.0353804	6.07966e-05	0.00273585	0.1688	0.0276	9.59882e-10	-0.01239	0.017586	0.481098	trans	ABO	Yes	downstream_gene_variant
9:133200789:C:G	rs11795119	FAM3D_13102	COVID_C2	13	0.141865	0.0353804	6.07966e-05	0.00273585	0.3478	0.0481	4.80266e-13	0.042308	0.027479	0.123646	trans	ABO	Yes	downstream_gene_variant
9:133318693:A:G	rs567493	FAM3D_13102	COVID_C2	13	0.141865	0.0353804	6.07966e-05	0.00273585	0.1688	0.0276	9.59882e-10	0.0072223	0.014885	0.62753	trans	ABO	Yes	downstream_gene_variant
9:133294153:A:C	rs116851371	FAM3D_13102	COVID_A2	13	0.141865	0.0353804	6.07966e-05	0.00273585	0.9888	0.1733	1.15857e-08	0.16303	0.25275	0.518911	trans	ABO	Yes	intergenic_variant
9:133295160:G:A	rs7869258	FAM3D_13102	COVID_A2	13	0.141865	0.0353804	6.07966e-05	0.00273585	0.2982	0.0252	2.62506e-32	0.12101	0.037613	0.00129431	trans	ABO	Yes	intergenic_variant
9:133294153:A:C	rs116851371	FAM3D_13102	COVID_B2	13	0.141865	0.0353804	6.07966e-05	0.00273585	0.9888	0.1733	1.15857e-08	-0.077737	0.25708	0.762359	trans	ABO	Yes	intergenic_variant
9:133295160:G:A	rs7869258	FAM3D_13102	COVID_B2	13	0.141865	0.0353804	6.07966e-05	0.00273585	0.2982	0.0252	2.62506e-32	0.067615	0.024378	0.00554385	trans	ABO	Yes	intergenic_variant
9:133294153:A:C	rs116851371	FAM3D_13102	COVID_C1	13	0.141865	0.0353804	6.07966e-05	0.00273585	0.9888	0.1733	1.15857e-08	-0.24456	0.28096	0.384058	trans	ABO	Yes	intergenic_variant
9:133295160:G:A	rs7869258	FAM3D_13102	COVID_C1	13	0.141865	0.0353804	6.07966e-05	0.00273585	0.2982	0.0252	2.62506e-32	0.013494	0.016213	0.405242	trans	ABO	Yes	intergenic_variant
9:133294153:A:C	rs116851371	FAM3D_13102	COVID_C2	13	0.141865	0.0353804	6.07966e-05	0.00273585	0.9888	0.1733	1.15857e-08	-0.10667	0.15972	0.504225	trans	ABO	Yes	intergenic_variant
9:133295160:G:A	rs7869258	FAM3D_13102	COVID_C2	13	0.141865	0.0353804	6.07966e-05	0.00273585	0.2982	0.0252	2.62506e-32	0.017874	0.01375	0.193626	trans	ABO	Yes	intergenic_variant
19:48612517:T:G	rs148539701	FAM3D_13102	COVID_A2	13	0.141865	0.0353804	6.07966e-05	0.00273585	0.2484	0.0392	2.34686e-10	0.061163	0.060708	0.313697	trans	SULT2B1	Yes	intron_variant
19:48636583:A:AGGAG	rs145549529	FAM3D_13102	COVID_A2	13	0.141865	0.0353804	6.07966e-05	0.00273585	0.2635	0.0469	1.92804e-08	0.17281	0.066374	0.00922558	trans	FAM83E	Yes	intron_variant
19:48664521:C:A	rs184969096	FAM3D_13102	COVID_A2	13	0.141865	0.0353804	6.07966e-05	0.00273585	0.3664	0.0627	5.10539e-09	-0.041036	0.10353	0.691833	trans	NTN5	Yes	intron_variant
3:58666565:G:T	rs3749290	FAM3D_13102	COVID_A2	13	0.141865	0.0353804	6.07966e-05	0.00273585	-0.481	0.0413	2.39108e-31	0.0093175	0.042619	0.826944	cis		Yes	intron_variant
9:133274295:A:T	rs115478735	FAM3D_13102	COVID_A2	13	0.141865	0.0353804	6.07966e-05	0.00273585	0.6968	0.0299	4.00536e-120	0.1862	0.046057	5.28129e-05	trans	ABO	Yes	intron_variant
9:133473065:A:C	rs3124762	FAM3D_13102	COVID_A2	13	0.141865	0.0353804	6.07966e-05	0.00273585	-0.2042	0.0335	1.09081e-09	-0.085121	0.050534	0.0920985	trans	ABO	Yes	intron_variant
9:133517594:A:G	rs9802874	FAM3D_13102	COVID_A2	13	0.141865	0.0353804	6.07966e-05	0.00273585	-0.1886	0.0263	7.43961e-13	-0.067622	0.042876	0.11476	trans	ABO	Yes	intron_variant
19:48612517:T:G	rs148539701	FAM3D_13102	COVID_B2	13	0.141865	0.0353804	6.07966e-05	0.00273585	0.2484	0.0392	2.34686e-10	0.10413	0.041747	0.0126202	trans	SULT2B1	Yes	intron_variant
19:48636583:A:AGGAG	rs145549529	FAM3D_13102	COVID_B2	13	0.141865	0.0353804	6.07966e-05	0.00273585	0.2635	0.0469	1.92804e-08	0.095595	0.046262	0.0387924	trans	FAM83E	Yes	intron_variant
19:48664521:C:A	rs184969096	FAM3D_13102	COVID_B2	13	0.141865	0.0353804	6.07966e-05	0.00273585	0.3664	0.0627	5.10539e-09	0.0019519	0.068642	0.977314	trans	NTN5	Yes	intron_variant
3:58666565:G:T	rs3749290	FAM3D_13102	COVID_B2	13	0.141865	0.0353804	6.07966e-05	0.00273585	-0.481	0.0413	2.39108e-31	0.015754	0.031352	0.615324	cis		Yes	intron_variant
9:133274295:A:T	rs115478735	FAM3D_13102	COVID_B2	13	0.141865	0.0353804	6.07966e-05	0.00273585	0.6968	0.0299	4.00536e-120	0.13345	0.032563	4.16358e-05	trans	ABO	Yes	intron_variant
9:133473065:A:C	rs3124762	FAM3D_13102	COVID_B2	13	0.141865	0.0353804	6.07966e-05	0.00273585	-0.2042	0.0335	1.09081e-09	-0.032579	0.033327	0.328294	trans	ABO	Yes	intron_variant
9:133517594:A:G	rs9802874	FAM3D_13102	COVID_B2	13	0.141865	0.0353804	6.07966e-05	0.00273585	-0.1886	0.0263	7.43961e-13	-0.020331	0.029574	0.491792	trans	ABO	Yes	intron_variant
19:48612517:T:G	rs148539701	FAM3D_13102	COVID_C1	13	0.141865	0.0353804	6.07966e-05	0.00273585	0.2484	0.0392	2.34686e-10	0.0050878	0.027858	0.855086	trans	SULT2B1	Yes	intron_variant
19:48636583:A:AGGAG	rs145549529	FAM3D_13102	COVID_C1	13	0.141865	0.0353804	6.07966e-05	0.00273585	0.2635	0.0469	1.92804e-08	0.025217	0.035554	0.478164	trans	FAM83E	Yes	intron_variant
19:48664521:C:A	rs184969096	FAM3D_13102	COVID_C1	13	0.141865	0.0353804	6.07966e-05	0.00273585	0.3664	0.0627	5.10539e-09	0.086759	0.044959	0.0536396	trans	NTN5	Yes	intron_variant
3:58666565:G:T	rs3749290	FAM3D_13102	COVID_C1	13	0.141865	0.0353804	6.07966e-05	0.00273585	-0.481	0.0413	2.39108e-31	0.0018902	0.023964	0.937131	cis		Yes	intron_variant
9:133274295:A:T	rs115478735	FAM3D_13102	COVID_C1	13	0.141865	0.0353804	6.07966e-05	0.00273585	0.6968	0.0299	4.00536e-120	0.062428	0.027161	0.0215366	trans	ABO	Yes	intron_variant
9:133473065:A:C	rs3124762	FAM3D_13102	COVID_C1	13	0.141865	0.0353804	6.07966e-05	0.00273585	-0.2042	0.0335	1.09081e-09	-0.018783	0.021473	0.381723	trans	ABO	Yes	intron_variant
9:133517594:A:G	rs9802874	FAM3D_13102	COVID_C1	13	0.141865	0.0353804	6.07966e-05	0.00273585	-0.1886	0.0263	7.43961e-13	0.003984	0.019615	0.839049	trans	ABO	Yes	intron_variant
19:48612517:T:G	rs148539701	FAM3D_13102	COVID_C2	13	0.141865	0.0353804	6.07966e-05	0.00273585	0.2484	0.0392	2.34686e-10	0.00062174	0.023524	0.978914	trans	SULT2B1	Yes	intron_variant
19:48636583:A:AGGAG	rs145549529	FAM3D_13102	COVID_C2	13	0.141865	0.0353804	6.07966e-05	0.00273585	0.2635	0.0469	1.92804e-08	0.045933	0.028634	0.108683	trans	FAM83E	Yes	intron_variant
19:48664521:C:A	rs184969096	FAM3D_13102	COVID_C2	13	0.141865	0.0353804	6.07966e-05	0.00273585	0.3664	0.0627	5.10539e-09	0.078924	0.039231	0.0442435	trans	NTN5	Yes	intron_variant
3:58666565:G:T	rs3749290	FAM3D_13102	COVID_C2	13	0.141865	0.0353804	6.07966e-05	0.00273585	-0.481	0.0413	2.39108e-31	0.013051	0.019573	0.504909	cis		Yes	intron_variant
9:133274295:A:T	rs115478735	FAM3D_13102	COVID_C2	13	0.141865	0.0353804	6.07966e-05	0.00273585	0.6968	0.0299	4.00536e-120	0.075687	0.02177	0.000507691	trans	ABO	Yes	intron_variant
9:133473065:A:C	rs3124762	FAM3D_13102	COVID_C2	13	0.141865	0.0353804	6.07966e-05	0.00273585	-0.2042	0.0335	1.09081e-09	-0.040265	0.018329	0.0280353	trans	ABO	Yes	intron_variant
9:133517594:A:G	rs9802874	FAM3D_13102	COVID_C2	13	0.141865	0.0353804	6.07966e-05	0.00273585	-0.1886	0.0263	7.43961e-13	5.356e-05	0.016118	0.997349	trans	ABO	Yes	intron_variant
3:58653691:C:T	rs13097314	FAM3D_13102	COVID_A2	13	0.141865	0.0353804	6.07966e-05	0.00273585	-1.2304	0.1287	1.17509e-21	0.32368	0.21439	0.131102	cis		Yes	missense_variant
3:58653691:C:T	rs13097314	FAM3D_13102	COVID_B2	13	0.141865	0.0353804	6.07966e-05	0.00273585	-1.2304	0.1287	1.17509e-21	0.16417	0.17904	0.359171	cis		Yes	missense_variant
3:58653691:C:T	rs13097314	FAM3D_13102	COVID_C1	13	0.141865	0.0353804	6.07966e-05	0.00273585	-1.2304	0.1287	1.17509e-21	-0.19739	0.12696	0.120008	cis		Yes	missense_variant
3:58653691:C:T	rs13097314	FAM3D_13102	COVID_C2	13	0.141865	0.0353804	6.07966e-05	0.00273585	-1.2304	0.1287	1.17509e-21	0.016832	0.10699	0.87499	cis		Yes	missense_variant
19:48703417:G:A	rs601338	FAM3D_13102	COVID_A2	13	0.141865	0.0353804	6.07966e-05	0.00273585	-0.5122	0.0229	8.28496e-111	-0.073956	0.027225	0.00659814	trans	FUT2	Yes	stop_gained
19:48703417:G:A	rs601338	FAM3D_13102	COVID_B2	13	0.141865	0.0353804	6.07966e-05	0.00273585	-0.5122	0.0229	8.28496e-111	-0.055292	0.020747	0.00769746	trans	FUT2	Yes	stop_gained
19:48703417:G:A	rs601338	FAM3D_13102	COVID_C1	13	0.141865	0.0353804	6.07966e-05	0.00273585	-0.5122	0.0229	8.28496e-111	-0.05082	0.015437	0.000994456	trans	FUT2	Yes	stop_gained
19:48703417:G:A	rs601338	FAM3D_13102	COVID_C2	13	0.141865	0.0353804	6.07966e-05	0.00273585	-0.5122	0.0229	8.28496e-111	-0.040788	0.012624	0.00123363	trans	FUT2	Yes	stop_gained
9:133512489:G:A	rs186146622	SELE_3470_1_2	COVID_A2	15	-0.148941	0.0382734	9.96223e-05	0.0035864	-0.7787	0.1274	9.82393e-10	0.19544	0.21818	0.370373	trans	ABO	Yes	downstream_gene_variant
9:133512489:G:A	rs186146622	SELE_3470_1_2	COVID_B2	15	-0.148941	0.0382734	9.96223e-05	0.0035864	-0.7787	0.1274	9.82393e-10	-0.030704	0.18226	0.866219	trans	ABO	Yes	downstream_gene_variant
9:133512489:G:A	rs186146622	SELE_3470_1_2	COVID_C1	15	-0.148941	0.0382734	9.96223e-05	0.0035864	-0.7787	0.1274	9.82393e-10	0.028666	0.13079	0.826513	trans	ABO	Yes	downstream_gene_variant
9:133512489:G:A	rs186146622	SELE_3470_1_2	COVID_C2	15	-0.148941	0.0382734	9.96223e-05	0.0035864	-0.7787	0.1274	9.82393e-10	0.016307	0.11377	0.886027	trans	ABO	Yes	downstream_gene_variant
9:133244809:G:A	rs138704916	SELE_3470_1_2	COVID_A2	15	-0.148941	0.0382734	9.96223e-05	0.0035864	0.4094	0.0667	8.36031e-10	-0.061806	0.094464	0.512931	trans	OBP2B	Yes	intergenic_variant
9:133294153:A:C	rs116851371	SELE_3470_1_2	COVID_A2	15	-0.148941	0.0382734	9.96223e-05	0.0035864	-1.004	0.1732	6.76056e-09	0.16303	0.25275	0.518911	trans	ABO	Yes	intergenic_variant
9:133244809:G:A	rs138704916	SELE_3470_1_2	COVID_B2	15	-0.148941	0.0382734	9.96223e-05	0.0035864	0.4094	0.0667	8.36031e-10	-0.0054696	0.060403	0.927849	trans	OBP2B	Yes	intergenic_variant
9:133294153:A:C	rs116851371	SELE_3470_1_2	COVID_B2	15	-0.148941	0.0382734	9.96223e-05	0.0035864	-1.004	0.1732	6.76056e-09	-0.077737	0.25708	0.762359	trans	ABO	Yes	intergenic_variant
9:133244809:G:A	rs138704916	SELE_3470_1_2	COVID_C1	15	-0.148941	0.0382734	9.96223e-05	0.0035864	0.4094	0.0667	8.36031e-10	-0.027387	0.039818	0.491576	trans	OBP2B	Yes	intergenic_variant
9:133294153:A:C	rs116851371	SELE_3470_1_2	COVID_C1	15	-0.148941	0.0382734	9.96223e-05	0.0035864	-1.004	0.1732	6.76056e-09	-0.24456	0.28096	0.384058	trans	ABO	Yes	intergenic_variant
9:133244809:G:A	rs138704916	SELE_3470_1_2	COVID_C2	15	-0.148941	0.0382734	9.96223e-05	0.0035864	0.4094	0.0667	8.36031e-10	-0.022059	0.033977	0.516188	trans	OBP2B	Yes	intergenic_variant
9:133294153:A:C	rs116851371	SELE_3470_1_2	COVID_C2	15	-0.148941	0.0382734	9.96223e-05	0.0035864	-1.004	0.1732	6.76056e-09	-0.10667	0.15972	0.504225	trans	ABO	Yes	intergenic_variant
11:126416115:G:A	rs12288924	SELE_3470_1_2	COVID_A2	15	-0.148941	0.0382734	9.96223e-05	0.0035864	-0.1788	0.0315	1.37727e-08	-0.023908	0.047123	0.611907	trans	FOXRED1	Yes	intron_variant
11:126435600:G:A	rs11603123	SELE_3470_1_2	COVID_A2	15	-0.148941	0.0382734	9.96223e-05	0.0035864	0.3656	0.0665	3.8468e-08	-0.076816	0.11809	0.515378	trans	FAM118B	Yes	intron_variant
9:133158977:G:A	rs117804300	SELE_3470_1_2	COVID_A2	15	-0.148941	0.0382734	9.96223e-05	0.0035864	-0.5285	0.089	2.88164e-09	0.050457	0.096163	0.59979	trans	RALGDS	Yes	intron_variant
9:133262243:T:C	rs8176694	SELE_3470_1_2	COVID_A2	15	-0.148941	0.0382734	9.96223e-05	0.0035864	0.2767	0.0312	7.40781e-19	-0.031588	0.046638	0.498215	trans	ABO	Yes	intron_variant
9:133263362:GCGCCCACCACTA:G	rs8176685	SELE_3470_1_2	COVID_A2	15	-0.148941	0.0382734	9.96223e-05	0.0035864	-1.1669	0.0252	0	0.1842	0.045813	5.80272e-05	trans	ABO	Yes	intron_variant
9:133371378:G:A	rs183864830	SELE_3470_1_2	COVID_A2	15	-0.148941	0.0382734	9.96223e-05	0.0035864	-1.2026	0.1557	1.12887e-14	0.40343	0.24833	0.104254	trans	ABO	No	intron_variant
9:133427807:TA:T	rs11340341	SELE_3470_1_2	COVID_A2	15	-0.148941	0.0382734	9.96223e-05	0.0035864	0.2026	0.0248	3.10043e-16	-0.061344	0.036351	0.0914983	trans	ADAMTS13	Yes	intron_variant
9:133467311:C:G	rs141429199	SELE_3470_1_2	COVID_A2	15	-0.148941	0.0382734	9.96223e-05	0.0035864	-0.7918	0.0948	6.69346e-17	0.060957	0.12437	0.624045	trans	ABO	Yes	intron_variant
9:133517594:A:G	rs9802874	SELE_3470_1_2	COVID_A2	15	-0.148941	0.0382734	9.96223e-05	0.0035864	0.1843	0.0263	2.42433e-12	-0.067622	0.042876	0.11476	trans	ABO	Yes	intron_variant
11:126416115:G:A	rs12288924	SELE_3470_1_2	COVID_B2	15	-0.148941	0.0382734	9.96223e-05	0.0035864	-0.1788	0.0315	1.37727e-08	0.037713	0.030285	0.213033	trans	FOXRED1	Yes	intron_variant
11:126435600:G:A	rs11603123	SELE_3470_1_2	COVID_B2	15	-0.148941	0.0382734	9.96223e-05	0.0035864	0.3656	0.0665	3.8468e-08	-0.038965	0.075454	0.60557	trans	FAM118B	Yes	intron_variant
9:133158977:G:A	rs117804300	SELE_3470_1_2	COVID_B2	15	-0.148941	0.0382734	9.96223e-05	0.0035864	-0.5285	0.089	2.88164e-09	-0.071568	0.076919	0.352147	trans	RALGDS	Yes	intron_variant
9:133262243:T:C	rs8176694	SELE_3470_1_2	COVID_B2	15	-0.148941	0.0382734	9.96223e-05	0.0035864	0.2767	0.0312	7.40781e-19	-0.036165	0.032131	0.260357	trans	ABO	Yes	intron_variant
9:133263362:GCGCCCACCACTA:G	rs8176685	SELE_3470_1_2	COVID_B2	15	-0.148941	0.0382734	9.96223e-05	0.0035864	-1.1669	0.0252	0	0.14659	0.032232	5.41672e-06	trans	ABO	Yes	intron_variant
9:133371378:G:A	rs183864830	SELE_3470_1_2	COVID_B2	15	-0.148941	0.0382734	9.96223e-05	0.0035864	-1.2026	0.1557	1.12887e-14	0.32219	0.19564	0.0995886	trans	ABO	No	intron_variant
9:133427807:TA:T	rs11340341	SELE_3470_1_2	COVID_B2	15	-0.148941	0.0382734	9.96223e-05	0.0035864	0.2026	0.0248	3.10043e-16	-0.0063515	0.025185	0.800891	trans	ADAMTS13	Yes	intron_variant
9:133467311:C:G	rs141429199	SELE_3470_1_2	COVID_B2	15	-0.148941	0.0382734	9.96223e-05	0.0035864	-0.7918	0.0948	6.69346e-17	0.040852	0.091572	0.655511	trans	ABO	Yes	intron_variant
9:133516414:A:G	rs9330460	SELE_3470_1_2	COVID_B2	15	-0.148941	0.0382734	9.96223e-05	0.0035864	0.6494	0.0638	2.46879e-24	-0.016606	0.094828	0.860988	trans	ABO	Yes	intron_variant
11:126416115:G:A	rs12288924	SELE_3470_1_2	COVID_C1	15	-0.148941	0.0382734	9.96223e-05	0.0035864	-0.1788	0.0315	1.37727e-08	0.0081563	0.019341	0.673236	trans	FOXRED1	Yes	intron_variant
11:126435600:G:A	rs11603123	SELE_3470_1_2	COVID_C1	15	-0.148941	0.0382734	9.96223e-05	0.0035864	0.3656	0.0665	3.8468e-08	0.058658	0.045371	0.196062	trans	FAM118B	Yes	intron_variant
9:133158977:G:A	rs117804300	SELE_3470_1_2	COVID_C1	15	-0.148941	0.0382734	9.96223e-05	0.0035864	-0.5285	0.089	2.88164e-09	0.052333	0.055012	0.341451	trans	RALGDS	Yes	intron_variant
9:133262243:T:C	rs8176694	SELE_3470_1_2	COVID_C1	15	-0.148941	0.0382734	9.96223e-05	0.0035864	0.2767	0.0312	7.40781e-19	-0.025775	0.020841	0.216182	trans	ABO	Yes	intron_variant
9:133263362:GCGCCCACCACTA:G	rs8176685	SELE_3470_1_2	COVID_C1	15	-0.148941	0.0382734	9.96223e-05	0.0035864	-1.1669	0.0252	0	0.07653	0.026548	0.00394279	trans	ABO	Yes	intron_variant
9:133371378:G:A	rs183864830	SELE_3470_1_2	COVID_C1	15	-0.148941	0.0382734	9.96223e-05	0.0035864	-1.2026	0.1557	1.12887e-14	0.14093	0.12289	0.251465	trans	ABO	No	intron_variant
9:133427807:TA:T	rs11340341	SELE_3470_1_2	COVID_C1	15	-0.148941	0.0382734	9.96223e-05	0.0035864	0.2026	0.0248	3.10043e-16	0.00018035	0.018639	0.99228	trans	ADAMTS13	Yes	intron_variant
9:133467311:C:G	rs141429199	SELE_3470_1_2	COVID_C1	15	-0.148941	0.0382734	9.96223e-05	0.0035864	-0.7918	0.0948	6.69346e-17	0.12584	0.06856	0.0664357	trans	ABO	Yes	intron_variant
9:133516414:A:G	rs9330460	SELE_3470_1_2	COVID_C1	15	-0.148941	0.0382734	9.96223e-05	0.0035864	0.6494	0.0638	2.46879e-24	0.038483	0.046156	0.404417	trans	ABO	Yes	intron_variant
11:126416115:G:A	rs12288924	SELE_3470_1_2	COVID_C2	15	-0.148941	0.0382734	9.96223e-05	0.0035864	-0.1788	0.0315	1.37727e-08	-0.00030261	0.016975	0.985777	trans	FOXRED1	Yes	intron_variant
11:126435600:G:A	rs11603123	SELE_3470_1_2	COVID_C2	15	-0.148941	0.0382734	9.96223e-05	0.0035864	0.3656	0.0665	3.8468e-08	0.01673	0.04057	0.680066	trans	FAM118B	Yes	intron_variant
9:133158977:G:A	rs117804300	SELE_3470_1_2	COVID_C2	15	-0.148941	0.0382734	9.96223e-05	0.0035864	-0.5285	0.089	2.88164e-09	0.04951	0.047103	0.293212	trans	RALGDS	Yes	intron_variant
9:133262243:T:C	rs8176694	SELE_3470_1_2	COVID_C2	15	-0.148941	0.0382734	9.96223e-05	0.0035864	0.2767	0.0312	7.40781e-19	-0.034229	0.018341	0.0620056	trans	ABO	Yes	intron_variant
9:133263362:GCGCCCACCACTA:G	rs8176685	SELE_3470_1_2	COVID_C2	15	-0.148941	0.0382734	9.96223e-05	0.0035864	-1.1669	0.0252	0	0.08315	0.021549	0.000114016	trans	ABO	Yes	intron_variant
9:133371378:G:A	rs183864830	SELE_3470_1_2	COVID_C2	15	-0.148941	0.0382734	9.96223e-05	0.0035864	-1.2026	0.1557	1.12887e-14	0.28969	0.10963	0.00823126	trans	ABO	No	intron_variant
9:133427807:TA:T	rs11340341	SELE_3470_1_2	COVID_C2	15	-0.148941	0.0382734	9.96223e-05	0.0035864	0.2026	0.0248	3.10043e-16	0.002916	0.015199	0.847856	trans	ADAMTS13	Yes	intron_variant
9:133467311:C:G	rs141429199	SELE_3470_1_2	COVID_C2	15	-0.148941	0.0382734	9.96223e-05	0.0035864	-0.7918	0.0948	6.69346e-17	0.015662	0.054804	0.775045	trans	ABO	Yes	intron_variant
9:133516414:A:G	rs9330460	SELE_3470_1_2	COVID_C2	15	-0.148941	0.0382734	9.96223e-05	0.0035864	0.6494	0.0638	2.46879e-24	0.036218	0.042245	0.391261	trans	ABO	Yes	intron_variant
9:133301911:T:C	rs656105	SELE_3470_1_2	COVID_A2	15	-0.148941	0.0382734	9.96223e-05	0.0035864	0.1733	0.0251	5.04223e-12	-0.0016496	0.03572	0.963166	trans	ABO	Yes	upstream_gene_variant
9:133479731:G:A	rs3124758	SELE_3470_1_2	COVID_A2	15	-0.148941	0.0382734	9.96223e-05	0.0035864	0.2536	0.0343	1.42921e-13	-0.041117	0.051084	0.420883	trans	SURF1	Yes	upstream_gene_variant
9:133532073:C:T	rs11507716	SELE_3470_1_2	COVID_A2	15	-0.148941	0.0382734	9.96223e-05	0.0035864	-0.2812	0.0371	3.4685e-14	0.018145	0.041208	0.6597	trans	ABO	Yes	upstream_gene_variant
9:133301911:T:C	rs656105	SELE_3470_1_2	COVID_B2	15	-0.148941	0.0382734	9.96223e-05	0.0035864	0.1733	0.0251	5.04223e-12	0.0063053	0.026103	0.809125	trans	ABO	Yes	upstream_gene_variant
9:133479731:G:A	rs3124758	SELE_3470_1_2	COVID_B2	15	-0.148941	0.0382734	9.96223e-05	0.0035864	0.2536	0.0343	1.42921e-13	-0.052903	0.033957	0.119247	trans	SURF1	Yes	upstream_gene_variant
9:133532073:C:T	rs11507716	SELE_3470_1_2	COVID_B2	15	-0.148941	0.0382734	9.96223e-05	0.0035864	-0.2812	0.0371	3.4685e-14	0.018022	0.03262	0.580617	trans	ABO	Yes	upstream_gene_variant
9:133301911:T:C	rs656105	SELE_3470_1_2	COVID_C1	15	-0.148941	0.0382734	9.96223e-05	0.0035864	0.1733	0.0251	5.04223e-12	0.014487	0.018295	0.428445	trans	ABO	Yes	upstream_gene_variant
9:133479731:G:A	rs3124758	SELE_3470_1_2	COVID_C1	15	-0.148941	0.0382734	9.96223e-05	0.0035864	0.2536	0.0343	1.42921e-13	-0.012284	0.021509	0.567925	trans	SURF1	Yes	upstream_gene_variant
9:133532073:C:T	rs11507716	SELE_3470_1_2	COVID_C1	15	-0.148941	0.0382734	9.96223e-05	0.0035864	-0.2812	0.0371	3.4685e-14	0.065941	0.025962	0.0110883	trans	ABO	Yes	upstream_gene_variant
9:133301911:T:C	rs656105	SELE_3470_1_2	COVID_C2	15	-0.148941	0.0382734	9.96223e-05	0.0035864	0.1733	0.0251	5.04223e-12	-0.0011335	0.014691	0.938499	trans	ABO	Yes	upstream_gene_variant
9:133479731:G:A	rs3124758	SELE_3470_1_2	COVID_C2	15	-0.148941	0.0382734	9.96223e-05	0.0035864	0.2536	0.0343	1.42921e-13	-0.024483	0.018551	0.186913	trans	SURF1	Yes	upstream_gene_variant
9:133532073:C:T	rs11507716	SELE_3470_1_2	COVID_C2	15	-0.148941	0.0382734	9.96223e-05	0.0035864	-0.2812	0.0371	3.4685e-14	0.036727	0.020306	0.0705012	trans	ABO	Yes	upstream_gene_variant
19:10286457:C:T	rs114170067	ICAM1_4342_10	COVID_A2	23	0.081848	0.0226276	0.00029783	0.00765849	0.6953	0.0551	1.66179e-36	-0.081449	0.083415	0.328851	cis		Yes	3_prime_UTR_variant
19:10317208:G:A	rs113337445	ICAM1_4342_10	COVID_A2	23	0.081848	0.0226276	0.00029783	0.00765849	0.5697	0.0912	4.19187e-10	0.20911	0.14586	0.151676	cis		Yes	3_prime_UTR_variant
19:10286457:C:T	rs114170067	ICAM1_4342_10	COVID_B1	23	0.081848	0.0226276	0.00029783	0.00765849	0.6953	0.0551	1.66179e-36	0.10987	0.08993	0.221811	cis		Yes	3_prime_UTR_variant
19:10317208:G:A	rs113337445	ICAM1_4342_10	COVID_B1	23	0.081848	0.0226276	0.00029783	0.00765849	0.5697	0.0912	4.19187e-10	-0.21599	0.16886	0.200859	cis		Yes	3_prime_UTR_variant
19:10286457:C:T	rs114170067	ICAM1_4342_10	COVID_B2	23	0.081848	0.0226276	0.00029783	0.00765849	0.6953	0.0551	1.66179e-36	-0.062769	0.054321	0.247878	cis		Yes	3_prime_UTR_variant
19:10317208:G:A	rs113337445	ICAM1_4342_10	COVID_B2	23	0.081848	0.0226276	0.00029783	0.00765849	0.5697	0.0912	4.19187e-10	0.10785	0.098959	0.275781	cis		Yes	3_prime_UTR_variant
6:46548446:T:C	rs186741596	ADGRF5_6409	COVID_A2	14	-0.149484	0.0411488	0.00028039	0.00765849	-1.1352	0.1869	1.2489e-09	0.42792	0.27914	0.125277	cis		Yes	downstream_gene_variant
9:133509774:G:A	rs28463601	ADGRF5_6409	COVID_A2	14	-0.149484	0.0411488	0.00028039	0.00765849	-0.2628	0.0448	4.46242e-09	0.072011	0.075489	0.340121	trans	ABO	Yes	downstream_gene_variant
19:10297905:G:T	rs148215750	ICAM1_4342_10	COVID_A2	23	0.081848	0.0226276	0.00029783	0.00765849	0.4026	0.0575	2.52804e-12	-0.056033	0.064315	0.38363	cis		Yes	downstream_gene_variant
19:10300761:A:G	rs112138598	ICAM1_4342_10	COVID_A2	23	0.081848	0.0226276	0.00029783	0.00765849	0.4278	0.0571	6.77704e-14	0.13899	0.090736	0.12557	cis		Yes	downstream_gene_variant
19:10301733:G:A	rs140735577	ICAM1_4342_10	COVID_A2	23	0.081848	0.0226276	0.00029783	0.00765849	0.5831	0.0482	1.08863e-33	0.22701	0.08514	0.0076688	cis		Yes	downstream_gene_variant
19:10347871:G:T	rs510506	ICAM1_4342_10	COVID_A2	23	0.081848	0.0226276	0.00029783	0.00765849	0.3622	0.0337	6.07087e-27	0.10272	0.037124	0.00565846	cis		Yes	downstream_gene_variant
19:10482464:T:TC	rs56839405	ICAM1_4342_10	COVID_A2	23	0.081848	0.0226276	0.00029783	0.00765849	0.2309	0.0269	9.19148e-18	-0.0040394	0.039793	0.919145	cis		Yes	downstream_gene_variant
19:10485452:A:C	rs62131890	ICAM1_4342_10	COVID_A2	23	0.081848	0.0226276	0.00029783	0.00765849	-0.4738	0.0498	1.8337e-21	-0.088586	0.0837	0.289884	cis		Yes	downstream_gene_variant
19:10297905:G:T	rs148215750	ICAM1_4342_10	COVID_B1	23	0.081848	0.0226276	0.00029783	0.00765849	0.4026	0.0575	2.52804e-12	-0.085991	0.098327	0.381824	cis		Yes	downstream_gene_variant
19:10300761:A:G	rs112138598	ICAM1_4342_10	COVID_B1	23	0.081848	0.0226276	0.00029783	0.00765849	0.4278	0.0571	6.77704e-14	-0.072414	0.1268	0.56794	cis		Yes	downstream_gene_variant
19:10301733:G:A	rs140735577	ICAM1_4342_10	COVID_B1	23	0.081848	0.0226276	0.00029783	0.00765849	0.5831	0.0482	1.08863e-33	-0.012292	0.12212	0.919824	cis		Yes	downstream_gene_variant
19:10347871:G:T	rs510506	ICAM1_4342_10	COVID_B1	23	0.081848	0.0226276	0.00029783	0.00765849	0.3622	0.0337	6.07087e-27	-0.040867	0.051525	0.427691	cis		Yes	downstream_gene_variant
19:10482464:T:TC	rs56839405	ICAM1_4342_10	COVID_B1	23	0.081848	0.0226276	0.00029783	0.00765849	0.2309	0.0269	9.19148e-18	0.023611	0.075953	0.755905	cis		Yes	downstream_gene_variant
19:10485452:A:C	rs62131890	ICAM1_4342_10	COVID_B1	23	0.081848	0.0226276	0.00029783	0.00765849	-0.4738	0.0498	1.8337e-21	-0.076471	0.095599	0.42376	cis		Yes	downstream_gene_variant
19:10297905:G:T	rs148215750	ICAM1_4342_10	COVID_B2	23	0.081848	0.0226276	0.00029783	0.00765849	0.4026	0.0575	2.52804e-12	-0.051882	0.050113	0.300529	cis		Yes	downstream_gene_variant
19:10300761:A:G	rs112138598	ICAM1_4342_10	COVID_B2	23	0.081848	0.0226276	0.00029783	0.00765849	0.4278	0.0571	6.77704e-14	0.042909	0.064727	0.50738	cis		Yes	downstream_gene_variant
19:10301733:G:A	rs140735577	ICAM1_4342_10	COVID_B2	23	0.081848	0.0226276	0.00029783	0.00765849	0.5831	0.0482	1.08863e-33	0.088355	0.061706	0.152181	cis		Yes	downstream_gene_variant
19:10347871:G:T	rs510506	ICAM1_4342_10	COVID_B2	23	0.081848	0.0226276	0.00029783	0.00765849	0.3622	0.0337	6.07087e-27	0.015545	0.027378	0.570176	cis		Yes	downstream_gene_variant
19:10482464:T:TC	rs56839405	ICAM1_4342_10	COVID_B2	23	0.081848	0.0226276	0.00029783	0.00765849	0.2309	0.0269	9.19148e-18	-0.0017698	0.029952	0.952882	cis		Yes	downstream_gene_variant
19:10485452:A:C	rs62131890	ICAM1_4342_10	COVID_B2	23	0.081848	0.0226276	0.00029783	0.00765849	-0.4738	0.0498	1.8337e-21	-0.14069	0.055866	0.0117907	cis		Yes	downstream_gene_variant
5:56035476:A:G	rs140477171	ADGRF5_6409	COVID_A2	14	-0.149484	0.0411488	0.00028039	0.00765849	0.1742	0.0317	3.90117e-08	-0.042253	0.047491	0.373624	trans	IL6ST	Yes	intergenic_variant
9:133172006:A:G	rs2039184	ADGRF5_6409	COVID_A2	14	-0.149484	0.0411488	0.00028039	0.00765849	-0.1865	0.0251	1.08369e-13	0.016553	0.027381	0.545482	trans	ABO	Yes	intergenic_variant
9:133244597:C:CA	rs566529676	ADGRF5_6409	COVID_A2	14	-0.149484	0.0411488	0.00028039	0.00765849	-0.8559	0.126	1.09934e-11	0.14378	0.20816	0.489742	trans	ABO	Yes	intergenic_variant
9:133292514:C:A	rs176699	ADGRF5_6409	COVID_A2	14	-0.149484	0.0411488	0.00028039	0.00765849	-0.195	0.0255	2.05628e-14	0.1185	0.037881	0.0017587	trans	ABO	Yes	intergenic_variant
9:133496388:A:G	rs3124775	ADGRF5_6409	COVID_A2	14	-0.149484	0.0411488	0.00028039	0.00765849	0.1667	0.0272	8.86131e-10	-0.049435	0.041932	0.238425	trans	ABO	Yes	intergenic_variant
19:10080866:T:C	rs5027494	ICAM1_4342_10	COVID_A2	23	0.081848	0.0226276	0.00029783	0.00765849	-0.1552	0.0266	5.39241e-09	0.051196	0.038157	0.179687	cis		Yes	intergenic_variant
19:10080866:T:C	rs5027494	ICAM1_4342_10	COVID_B1	23	0.081848	0.0226276	0.00029783	0.00765849	-0.1552	0.0266	5.39241e-09	-0.031332	0.053776	0.560136	cis		Yes	intergenic_variant
19:10080866:T:C	rs5027494	ICAM1_4342_10	COVID_B2	23	0.081848	0.0226276	0.00029783	0.00765849	-0.1552	0.0266	5.39241e-09	0.015418	0.026998	0.567946	cis		Yes	intergenic_variant
6:46865231:A:G	rs1234128	ADGRF5_6409	COVID_A2	14	-0.149484	0.0411488	0.00028039	0.00765849	0.2159	0.0384	1.88327e-08	-0.10849	0.057873	0.0608447	cis		Yes	intron_variant
6:46879088:A:G	rs220667	ADGRF5_6409	COVID_A2	14	-0.149484	0.0411488	0.00028039	0.00765849	0.2387	0.0309	1.11924e-14	0.031331	0.033395	0.348145	cis		Yes	intron_variant
6:46914869:T:G	rs9463259	ADGRF5_6409	COVID_A2	14	-0.149484	0.0411488	0.00028039	0.00765849	-0.2699	0.0348	8.78249e-15	0.074726	0.038741	0.0537481	cis		Yes	intron_variant
6:47024806:G:A	rs79214541	ADGRF5_6409	COVID_A2	14	-0.149484	0.0411488	0.00028039	0.00765849	-0.8103	0.1485	4.85432e-08	0.31386	0.25261	0.214064	cis		Yes	intron_variant
9:133263362:GCGCCCACCACTA:G	rs8176685	ADGRF5_6409	COVID_A2	14	-0.149484	0.0411488	0.00028039	0.00765849	-0.7795	0.0294	6.75434e-155	0.1842	0.045813	5.80272e-05	trans	ABO	Yes	intron_variant
9:133460340:C:T	rs2301615	ADGRF5_6409	COVID_A2	14	-0.149484	0.0411488	0.00028039	0.00765849	0.1713	0.0264	8.66167e-11	-0.04463	0.040613	0.271808	trans	ADAMTS13	Yes	intron_variant
19:10225247:A:G	rs74179903	ICAM1_4342_10	COVID_A2	23	0.081848	0.0226276	0.00029783	0.00765849	-0.4284	0.0545	3.82449e-15	-0.1071	0.089327	0.230541	cis		Yes	intron_variant
19:10273947:A:G	rs5030348	ICAM1_4342_10	COVID_A2	23	0.081848	0.0226276	0.00029783	0.00765849	0.2749	0.0249	2.44595e-28	-0.031346	0.038306	0.413183	cis		Yes	intron_variant
19:10279106:G:T	rs76923681	ICAM1_4342_10	COVID_A2	23	0.081848	0.0226276	0.00029783	0.00765849	-0.6588	0.0858	1.61186e-14	-0.071494	0.16821	0.670816	cis		Yes	intron_variant
19:10306201:C:T	rs11882594	ICAM1_4342_10	COVID_A2	23	0.081848	0.0226276	0.00029783	0.00765849	0.4364	0.0465	6.29485e-21	0.042877	0.069604	0.537886	cis		Yes	intron_variant
19:10324188:G:A	rs78439352	ICAM1_4342_10	COVID_A2	23	0.081848	0.0226276	0.00029783	0.00765849	-0.4454	0.0559	1.61524e-15	-0.060541	0.061901	0.32806	cis		Yes	intron_variant
19:10330063:C:T	rs3181050	ICAM1_4342_10	COVID_A2	23	0.081848	0.0226276	0.00029783	0.00765849	0.3991	0.0511	5.71081e-15	0.081536	0.072492	0.260691	cis		Yes	intron_variant
19:10337759:G:C	rs148996243	ICAM1_4342_10	COVID_A2	23	0.081848	0.0226276	0.00029783	0.00765849	-0.749	0.1153	8.24304e-11	0.050178	0.20435	0.806031	cis		Yes	intron_variant
19:10456649:C:T	rs143756038	ICAM1_4342_10	COVID_A2	23	0.081848	0.0226276	0.00029783	0.00765849	-0.6283	0.0993	2.49503e-10	0.13703	0.17305	0.428447	cis		Yes	intron_variant
19:11003676:A:G	rs12983316	ICAM1_4342_10	COVID_A2	23	0.081848	0.0226276	0.00029783	0.00765849	-0.2232	0.0332	1.78153e-11	-0.059901	0.038435	0.119114	cis		Yes	intron_variant
19:10148229:G:A	rs6511610	ICAM1_4342_10	COVID_B1	23	0.081848	0.0226276	0.00029783	0.00765849	0.2955	0.0256	8.01117e-31	-0.03863	0.052906	0.465291	cis		Yes	intron_variant
19:10182485:A:G	rs142184151	ICAM1_4342_10	COVID_B1	23	0.081848	0.0226276	0.00029783	0.00765849	-0.5569	0.0552	6.1942e-24	-0.054249	0.13345	0.684367	cis		Yes	intron_variant
19:10225247:A:G	rs74179903	ICAM1_4342_10	COVID_B1	23	0.081848	0.0226276	0.00029783	0.00765849	-0.4284	0.0545	3.82449e-15	0.095269	0.093705	0.309301	cis		Yes	intron_variant
19:10273947:A:G	rs5030348	ICAM1_4342_10	COVID_B1	23	0.081848	0.0226276	0.00029783	0.00765849	0.2749	0.0249	2.44595e-28	-0.028163	0.041886	0.501347	cis		Yes	intron_variant
19:10279106:G:T	rs76923681	ICAM1_4342_10	COVID_B1	23	0.081848	0.0226276	0.00029783	0.00765849	-0.6588	0.0858	1.61186e-14	0.39935	0.16793	0.0174033	cis		Yes	intron_variant
19:10306201:C:T	rs11882594	ICAM1_4342_10	COVID_B1	23	0.081848	0.0226276	0.00029783	0.00765849	0.4364	0.0465	6.29485e-21	-0.083105	0.071226	0.2433	cis		Yes	intron_variant
19:10324188:G:A	rs78439352	ICAM1_4342_10	COVID_B1	23	0.081848	0.0226276	0.00029783	0.00765849	-0.4454	0.0559	1.61524e-15	-0.12255	0.085337	0.150982	cis		Yes	intron_variant
19:10330063:C:T	rs3181050	ICAM1_4342_10	COVID_B1	23	0.081848	0.0226276	0.00029783	0.00765849	0.3991	0.0511	5.71081e-15	0.11343	0.085263	0.183402	cis		Yes	intron_variant
19:10337759:G:C	rs148996243	ICAM1_4342_10	COVID_B1	23	0.081848	0.0226276	0.00029783	0.00765849	-0.749	0.1153	8.24304e-11	-0.22535	0.33073	0.495636	cis		Yes	intron_variant
19:10456649:C:T	rs143756038	ICAM1_4342_10	COVID_B1	23	0.081848	0.0226276	0.00029783	0.00765849	-0.6283	0.0993	2.49503e-10	-0.43309	0.23132	0.0611713	cis		Yes	intron_variant
19:11003676:A:G	rs12983316	ICAM1_4342_10	COVID_B1	23	0.081848	0.0226276	0.00029783	0.00765849	-0.2232	0.0332	1.78153e-11	0.044328	0.057929	0.444145	cis		Yes	intron_variant
9:133274293:AC:A	rs8176643	ICAM1_4342_10	COVID_B1	23	0.081848	0.0226276	0.00029783	0.00765849	-0.2752	0.0328	4.85135e-17	-0.05708	0.065676	0.384784	trans	ABO	Yes	intron_variant
19:10148229:G:A	rs6511610	ICAM1_4342_10	COVID_B2	23	0.081848	0.0226276	0.00029783	0.00765849	0.2955	0.0256	8.01117e-31	-0.034569	0.027856	0.21461	cis		Yes	intron_variant
19:10225247:A:G	rs74179903	ICAM1_4342_10	COVID_B2	23	0.081848	0.0226276	0.00029783	0.00765849	-0.4284	0.0545	3.82449e-15	0.077096	0.057876	0.182831	cis		Yes	intron_variant
19:10273947:A:G	rs5030348	ICAM1_4342_10	COVID_B2	23	0.081848	0.0226276	0.00029783	0.00765849	0.2749	0.0249	2.44595e-28	-0.03247	0.025208	0.197717	cis		Yes	intron_variant
19:10279106:G:T	rs76923681	ICAM1_4342_10	COVID_B2	23	0.081848	0.0226276	0.00029783	0.00765849	-0.6588	0.0858	1.61186e-14	0.031368	0.11331	0.781908	cis		Yes	intron_variant
19:10306201:C:T	rs11882594	ICAM1_4342_10	COVID_B2	23	0.081848	0.0226276	0.00029783	0.00765849	0.4364	0.0465	6.29485e-21	0.014719	0.043794	0.736798	cis		Yes	intron_variant
19:10324188:G:A	rs78439352	ICAM1_4342_10	COVID_B2	23	0.081848	0.0226276	0.00029783	0.00765849	-0.4454	0.0559	1.61524e-15	-0.062311	0.045864	0.174272	cis		Yes	intron_variant
19:10330063:C:T	rs3181050	ICAM1_4342_10	COVID_B2	23	0.081848	0.0226276	0.00029783	0.00765849	0.3991	0.0511	5.71081e-15	0.033169	0.048924	0.497791	cis		Yes	intron_variant
19:10337759:G:C	rs148996243	ICAM1_4342_10	COVID_B2	23	0.081848	0.0226276	0.00029783	0.00765849	-0.749	0.1153	8.24304e-11	-0.097527	0.15522	0.529798	cis		Yes	intron_variant
19:10456649:C:T	rs143756038	ICAM1_4342_10	COVID_B2	23	0.081848	0.0226276	0.00029783	0.00765849	-0.6283	0.0993	2.49503e-10	0.17265	0.12226	0.157904	cis		Yes	intron_variant
19:11003676:A:G	rs12983316	ICAM1_4342_10	COVID_B2	23	0.081848	0.0226276	0.00029783	0.00765849	-0.2232	0.0332	1.78153e-11	-0.012628	0.029298	0.666454	cis		Yes	intron_variant
19:10284532:C:T	rs1801714	ICAM1_4342_10	COVID_A2	23	0.081848	0.0226276	0.00029783	0.00765849	-0.7653	0.0704	1.58909e-27	0.12729	0.10922	0.243839	cis		Yes	missense_variant
19:10285007:A:G	rs5498	ICAM1_4342_10	COVID_A2	23	0.081848	0.0226276	0.00029783	0.00765849	-1.1988	0.0136	0	-0.096651	0.027895	0.000530597	cis		Yes	missense_variant
19:10284532:C:T	rs1801714	ICAM1_4342_10	COVID_B1	23	0.081848	0.0226276	0.00029783	0.00765849	-0.7653	0.0704	1.58909e-27	-0.14496	0.11871	0.222038	cis		Yes	missense_variant
19:10285007:A:G	rs5498	ICAM1_4342_10	COVID_B1	23	0.081848	0.0226276	0.00029783	0.00765849	-1.1988	0.0136	0	-0.066819	0.040643	0.100167	cis		Yes	missense_variant
19:10284532:C:T	rs1801714	ICAM1_4342_10	COVID_B2	23	0.081848	0.0226276	0.00029783	0.00765849	-0.7653	0.0704	1.58909e-27	0.088069	0.07252	0.224591	cis		Yes	missense_variant
19:10285007:A:G	rs5498	ICAM1_4342_10	COVID_B2	23	0.081848	0.0226276	0.00029783	0.00765849	-1.1988	0.0136	0	-0.048706	0.020999	0.020371	cis		Yes	missense_variant
9:133253728:A:T	rs10793962	ADGRF5_6409	COVID_A2	14	-0.149484	0.0411488	0.00028039	0.00765849	0.7581	0.0481	5.77904e-56	-0.02906	0.052682	0.581215	trans	ABO	Yes	non_coding_transcript_exon_variant
19:10094559:C:T	rs80198180	ICAM1_4342_10	COVID_A2	23	0.081848	0.0226276	0.00029783	0.00765849	-0.6054	0.1075	1.78517e-08	-0.26	0.23601	0.270615	cis		Yes	non_coding_transcript_exon_variant
19:10119356:C:T	rs112407609	ICAM1_4342_10	COVID_A2	23	0.081848	0.0226276	0.00029783	0.00765849	-0.504	0.0518	2.2519e-22	0.13936	0.083635	0.0956561	cis		Yes	non_coding_transcript_exon_variant
19:10285093:G:A	rs115766769	ICAM1_4342_10	COVID_A2	23	0.081848	0.0226276	0.00029783	0.00765849	-0.9245	0.1376	1.8329e-11	-0.10553	0.18398	0.566242	cis		Yes	non_coding_transcript_exon_variant
19:10094559:C:T	rs80198180	ICAM1_4342_10	COVID_B1	23	0.081848	0.0226276	0.00029783	0.00765849	-0.6054	0.1075	1.78517e-08	0.14092	0.27542	0.608893	cis		Yes	non_coding_transcript_exon_variant
19:10285093:G:A	rs115766769	ICAM1_4342_10	COVID_B1	23	0.081848	0.0226276	0.00029783	0.00765849	-0.9245	0.1376	1.8329e-11	-0.13788	0.2712	0.611168	cis		Yes	non_coding_transcript_exon_variant
19:10094559:C:T	rs80198180	ICAM1_4342_10	COVID_B2	23	0.081848	0.0226276	0.00029783	0.00765849	-0.6054	0.1075	1.78517e-08	-0.17036	0.17177	0.321299	cis		Yes	non_coding_transcript_exon_variant
19:10119356:C:T	rs112407609	ICAM1_4342_10	COVID_B2	23	0.081848	0.0226276	0.00029783	0.00765849	-0.504	0.0518	2.2519e-22	0.039642	0.057928	0.493765	cis		Yes	non_coding_transcript_exon_variant
19:10285093:G:A	rs115766769	ICAM1_4342_10	COVID_B2	23	0.081848	0.0226276	0.00029783	0.00765849	-0.9245	0.1376	1.8329e-11	-0.064014	0.13688	0.640024	cis		Yes	non_coding_transcript_exon_variant
9:133318693:A:G	rs567493	TIE1_2844_53_2	COVID_B2	10	0.104204	0.030774	0.000708939	0.0212682	0.1728	0.0275	3.30744e-10	-0.0099619	0.026027	0.701903	trans	ABO	Yes	downstream_gene_variant
9:133318693:A:G	rs567493	TIE1_2844_53_2	COVID_C2	10	0.104204	0.030774	0.000708939	0.0212682	0.1728	0.0275	3.30744e-10	0.0072223	0.014885	0.62753	trans	ABO	Yes	downstream_gene_variant
3:98698056:G:T	rs10935473	TIE1_2844_53_2	COVID_B2	10	0.104204	0.030774	0.000708939	0.0212682	-0.2733	0.0246	1.12466e-28	-0.032974	0.021012	0.11658	trans	ST3GAL6	Yes	intergenic_variant
9:133169469:G:A	rs11244022	TIE1_2844_53_2	COVID_B2	10	0.104204	0.030774	0.000708939	0.0212682	0.6483	0.1188	4.84054e-08	0.13314	0.099806	0.182208	trans	GBGT1	Yes	intergenic_variant
9:133183922:G:A	rs60526253	TIE1_2844_53_2	COVID_B2	10	0.104204	0.030774	0.000708939	0.0212682	-0.2181	0.0374	5.49146e-09	-0.042701	0.033338	0.200246	trans	ABO	Yes	intergenic_variant
3:98698056:G:T	rs10935473	TIE1_2844_53_2	COVID_C2	10	0.104204	0.030774	0.000708939	0.0212682	-0.2733	0.0246	1.12466e-28	-0.011224	0.012861	0.382818	trans	ST3GAL6	Yes	intergenic_variant
9:133169469:G:A	rs11244022	TIE1_2844_53_2	COVID_C2	10	0.104204	0.030774	0.000708939	0.0212682	0.6483	0.1188	4.84054e-08	0.086921	0.059547	0.144371	trans	GBGT1	Yes	intergenic_variant
9:133183922:G:A	rs60526253	TIE1_2844_53_2	COVID_C2	10	0.104204	0.030774	0.000708939	0.0212682	-0.2181	0.0374	5.49146e-09	-0.047066	0.020488	0.0216047	trans	ABO	Yes	intergenic_variant
1:43307362:A:G	rs2275180	TIE1_2844_53_2	COVID_B2	10	0.104204	0.030774	0.000708939	0.0212682	0.2538	0.0251	4.90993e-24	0.039933	0.022803	0.0799085	cis		Yes	intron_variant
9:132974154:A:G	rs11243965	TIE1_2844_53_2	COVID_B2	10	0.104204	0.030774	0.000708939	0.0212682	0.4026	0.0721	2.35169e-08	0.087114	0.05678	0.124971	trans	ABO	Yes	intron_variant
9:133103292:A:C	rs150923157	TIE1_2844_53_2	COVID_B2	10	0.104204	0.030774	0.000708939	0.0212682	0.9172	0.1465	3.83128e-10	0.12667	0.22993	0.581698	trans	ABO	Yes	intron_variant
9:133263894:C:T	rs8176682	TIE1_2844_53_2	COVID_B2	10	0.104204	0.030774	0.000708939	0.0212682	-0.2722	0.0248	4.99581e-28	-0.11269	0.02431	3.56005e-06	trans	ABO	Yes	intron_variant
9:133318150:T:C	rs11791119	TIE1_2844_53_2	COVID_B2	10	0.104204	0.030774	0.000708939	0.0212682	-0.1631	0.0263	5.59201e-10	-0.056668	0.026508	0.0325354	trans	SURF6	Yes	intron_variant
1:43307362:A:G	rs2275180	TIE1_2844_53_2	COVID_C2	10	0.104204	0.030774	0.000708939	0.0212682	0.2538	0.0251	4.90993e-24	0.0098226	0.014358	0.493899	cis		Yes	intron_variant
9:132974154:A:G	rs11243965	TIE1_2844_53_2	COVID_C2	10	0.104204	0.030774	0.000708939	0.0212682	0.4026	0.0721	2.35169e-08	0.013728	0.033597	0.682827	trans	ABO	Yes	intron_variant
9:133103292:A:C	rs150923157	TIE1_2844_53_2	COVID_C2	10	0.104204	0.030774	0.000708939	0.0212682	0.9172	0.1465	3.83128e-10	0.17145	0.11951	0.151399	trans	ABO	Yes	intron_variant
9:133263894:C:T	rs8176682	TIE1_2844_53_2	COVID_C2	10	0.104204	0.030774	0.000708939	0.0212682	-0.2722	0.0248	4.99581e-28	-0.063593	0.013658	3.22257e-06	trans	ABO	Yes	intron_variant
9:133318150:T:C	rs11791119	TIE1_2844_53_2	COVID_C2	10	0.104204	0.030774	0.000708939	0.0212682	-0.1631	0.0263	5.59201e-10	-0.042783	0.015083	0.00456103	trans	SURF6	Yes	intron_variant
9:133256028:C:T	rs8176743	TIE1_2844_53_2	COVID_B2	10	0.104204	0.030774	0.000708939	0.0212682	1.1119	0.0454	1.83361e-132	0.073838	0.040531	0.0684905	trans	ABO	Yes	non_coding_transcript_exon_variant
9:133256028:C:T	rs8176743	TIE1_2844_53_2	COVID_C2	10	0.104204	0.030774	0.000708939	0.0212682	1.1119	0.0454	1.83361e-132	0.042539	0.022707	0.061015	trans	ABO	Yes	non_coding_transcript_exon_variant
1:154370041:C:T	rs79438587	IL6R_8092_29	COVID_B2	31	-0.0591008	0.0189245	0.00179031	0.0460365	0.3917	0.0338	4.699e-31	-0.0075833	0.0365	0.835415	cis		Yes	intergenic_variant
1:154395747:G:A	rs147763778	IL6R_8092_29	COVID_B2	31	-0.0591008	0.0189245	0.00179031	0.0460365	0.4384	0.0596	1.89922e-13	0.016105	0.063664	0.800292	cis		Yes	intergenic_variant
1:154659152:ACTGCG:A	rs201012281	IL6R_8092_29	COVID_B2	31	-0.0591008	0.0189245	0.00179031	0.0460365	0.7369	0.0885	8.32298e-17	-0.060411	0.10827	0.576867	cis		Yes	intergenic_variant
1:154678568:C:G	rs6426877	IL6R_8092_29	COVID_B2	31	-0.0591008	0.0189245	0.00179031	0.0460365	-0.2553	0.0248	7.47188e-25	-0.011054	0.028772	0.700835	cis		Yes	intergenic_variant
1:154370041:C:T	rs79438587	IL6R_8092_29	COVID_C2	31	-0.0591008	0.0189245	0.00179031	0.0460365	0.3917	0.0338	4.699e-31	-0.02627	0.020288	0.195371	cis		Yes	intergenic_variant
1:154395747:G:A	rs147763778	IL6R_8092_29	COVID_C2	31	-0.0591008	0.0189245	0.00179031	0.0460365	0.4384	0.0596	1.89922e-13	-0.022735	0.037237	0.541498	cis		Yes	intergenic_variant
1:154659152:ACTGCG:A	rs201012281	IL6R_8092_29	COVID_C2	31	-0.0591008	0.0189245	0.00179031	0.0460365	0.7369	0.0885	8.32298e-17	-0.04559	0.067196	0.497478	cis		Yes	intergenic_variant
1:154678568:C:G	rs6426877	IL6R_8092_29	COVID_C2	31	-0.0591008	0.0189245	0.00179031	0.0460365	-0.2553	0.0248	7.47188e-25	-0.00038807	0.018552	0.983311	cis		Yes	intergenic_variant
1:153875146:G:A	rs111795967	IL6R_8092_29	COVID_B2	31	-0.0591008	0.0189245	0.00179031	0.0460365	0.4444	0.0756	4.14484e-09	0.011813	0.067162	0.860382	cis		Yes	intron_variant
1:154182111:T:C	rs61806853	IL6R_8092_29	COVID_B2	31	-0.0591008	0.0189245	0.00179031	0.0460365	0.4936	0.0573	7.03637e-18	0.042149	0.052511	0.422166	cis		Yes	intron_variant
1:154420375:G:A	rs146389272	IL6R_8092_29	COVID_B2	31	-0.0591008	0.0189245	0.00179031	0.0460365	0.4935	0.0697	1.43797e-12	0.010446	0.072898	0.886056	cis		Yes	intron_variant
1:154421941:T:A	rs4601580	IL6R_8092_29	COVID_B2	31	-0.0591008	0.0189245	0.00179031	0.0460365	0.3413	0.0259	1.18078e-39	0.030346	0.026152	0.245898	cis		Yes	intron_variant
1:154430995:G:A	rs143318546	IL6R_8092_29	COVID_B2	31	-0.0591008	0.0189245	0.00179031	0.0460365	-0.8036	0.1437	2.24203e-08	0.0098687	0.19565	0.959771	cis		No	intron_variant
1:154431978:C:T	rs116037345	IL6R_8092_29	COVID_B2	31	-0.0591008	0.0189245	0.00179031	0.0460365	-0.6086	0.0713	1.39232e-17	-0.07279	0.060966	0.2325	cis		Yes	intron_variant
1:154436958:A:G	rs79778789	IL6R_8092_29	COVID_B2	31	-0.0591008	0.0189245	0.00179031	0.0460365	0.849	0.0884	7.68467e-22	-0.095142	0.091676	0.29936	cis		Yes	intron_variant
1:154439292:G:A	rs76093405	IL6R_8092_29	COVID_B2	31	-0.0591008	0.0189245	0.00179031	0.0460365	-0.6381	0.0777	2.16892e-16	-0.08405	0.076458	0.271639	cis		Yes	intron_variant
1:154443199:G:T	rs79219014	IL6R_8092_29	COVID_B2	31	-0.0591008	0.0189245	0.00179031	0.0460365	0.7069	0.0768	3.43499e-20	-0.0034654	0.071393	0.961286	cis		Yes	intron_variant
1:154443202:A:G	rs558681060	IL6R_8092_29	COVID_B2	31	-0.0591008	0.0189245	0.00179031	0.0460365	0.9886	0.1634	1.44681e-09	0.17325	0.24375	0.477227	cis		No	intron_variant
1:154443593:G:A	rs116141616	IL6R_8092_29	COVID_B2	31	-0.0591008	0.0189245	0.00179031	0.0460365	-0.4697	0.0721	7.29015e-11	0.037899	0.065158	0.560804	cis		Yes	intron_variant
1:154444329:C:T	rs139952834	IL6R_8092_29	COVID_B2	31	-0.0591008	0.0189245	0.00179031	0.0460365	-0.6409	0.1072	2.2514e-09	0.046198	0.12999	0.722293	cis		Yes	intron_variant
1:154447857:G:A	rs113580743	IL6R_8092_29	COVID_B2	31	-0.0591008	0.0189245	0.00179031	0.0460365	-0.525	0.0605	4.03903e-18	0.083711	0.073293	0.253395	cis		Yes	intron_variant
1:154453714:G:A	rs12739228	IL6R_8092_29	COVID_B2	31	-0.0591008	0.0189245	0.00179031	0.0460365	-0.6425	0.0648	3.57814e-23	0.014053	0.060148	0.815264	cis		Yes	intron_variant
1:154453788:C:T	rs4129267	IL6R_8092_29	COVID_B2	31	-0.0591008	0.0189245	0.00179031	0.0460365	1.1023	0.0159	0	-0.065937	0.021362	0.00202426	cis		Yes	intron_variant
1:154470538:C:T	rs79925547	IL6R_8092_29	COVID_B2	31	-0.0591008	0.0189245	0.00179031	0.0460365	0.779	0.1154	1.47404e-11	-0.074897	0.11901	0.529131	cis		Yes	intron_variant
1:154497349:T:C	rs140615642	IL6R_8092_29	COVID_B2	31	-0.0591008	0.0189245	0.00179031	0.0460365	0.5638	0.0836	1.54064e-11	-0.097382	0.12693	0.442957	cis		Yes	intron_variant
1:154511179:A:G	rs116059394	IL6R_8092_29	COVID_B2	31	-0.0591008	0.0189245	0.00179031	0.0460365	-0.5916	0.056	4.36277e-26	0.070142	0.059776	0.24063	cis		Yes	intron_variant
1:154525677:T:C	rs75631461	IL6R_8092_29	COVID_B2	31	-0.0591008	0.0189245	0.00179031	0.0460365	0.6022	0.0958	3.25724e-10	-0.026714	0.089556	0.765479	cis		Yes	intron_variant
1:154529836:C:T	rs116710125	IL6R_8092_29	COVID_B2	31	-0.0591008	0.0189245	0.00179031	0.0460365	-0.5956	0.0558	1.34939e-26	-0.047614	0.066365	0.473092	cis		Yes	intron_variant
1:154536585:G:A	rs147830103	IL6R_8092_29	COVID_B2	31	-0.0591008	0.0189245	0.00179031	0.0460365	-0.6744	0.084	9.86142e-16	0.055926	0.072516	0.440575	cis		Yes	intron_variant
1:154543928:C:T	rs76289529	IL6R_8092_29	COVID_B2	31	-0.0591008	0.0189245	0.00179031	0.0460365	0.6686	0.0678	6.12164e-23	0.075949	0.068312	0.266226	cis		Yes	intron_variant
1:154607518:G:A	rs145558655	IL6R_8092_29	COVID_B2	31	-0.0591008	0.0189245	0.00179031	0.0460365	0.6572	0.1161	1.50812e-08	0.19428	0.16511	0.239327	cis		Yes	intron_variant
1:154716012:T:C	rs58892549	IL6R_8092_29	COVID_B2	31	-0.0591008	0.0189245	0.00179031	0.0460365	0.4402	0.0536	2.16294e-16	-0.046758	0.042845	0.275128	cis		Yes	intron_variant
1:154725148:C:G	rs141444337	IL6R_8092_29	COVID_B2	31	-0.0591008	0.0189245	0.00179031	0.0460365	-0.4572	0.0637	7.10527e-13	0.0049014	0.073537	0.946859	cis		Yes	intron_variant
1:153875146:G:A	rs111795967	IL6R_8092_29	COVID_C2	31	-0.0591008	0.0189245	0.00179031	0.0460365	0.4444	0.0756	4.14484e-09	0.029837	0.041844	0.475813	cis		Yes	intron_variant
1:154182111:T:C	rs61806853	IL6R_8092_29	COVID_C2	31	-0.0591008	0.0189245	0.00179031	0.0460365	0.4936	0.0573	7.03637e-18	-0.0026723	0.033647	0.936697	cis		Yes	intron_variant
1:154420375:G:A	rs146389272	IL6R_8092_29	COVID_C2	31	-0.0591008	0.0189245	0.00179031	0.0460365	0.4935	0.0697	1.43797e-12	0.023594	0.040397	0.559184	cis		Yes	intron_variant
1:154421941:T:A	rs4601580	IL6R_8092_29	COVID_C2	31	-0.0591008	0.0189245	0.00179031	0.0460365	0.3413	0.0259	1.18078e-39	0.009619	0.014823	0.516388	cis		Yes	intron_variant
1:154430995:G:A	rs143318546	IL6R_8092_29	COVID_C2	31	-0.0591008	0.0189245	0.00179031	0.0460365	-0.8036	0.1437	2.24203e-08	0.15676	0.11742	0.181864	cis		No	intron_variant
1:154431978:C:T	rs116037345	IL6R_8092_29	COVID_C2	31	-0.0591008	0.0189245	0.00179031	0.0460365	-0.6086	0.0713	1.39232e-17	-0.056808	0.039211	0.1474	cis		Yes	intron_variant
1:154436958:A:G	rs79778789	IL6R_8092_29	COVID_C2	31	-0.0591008	0.0189245	0.00179031	0.0460365	0.849	0.0884	7.68467e-22	-0.010044	0.054668	0.854227	cis		Yes	intron_variant
1:154439292:G:A	rs76093405	IL6R_8092_29	COVID_C2	31	-0.0591008	0.0189245	0.00179031	0.0460365	-0.6381	0.0777	2.16892e-16	-0.067726	0.046099	0.141794	cis		Yes	intron_variant
1:154443199:G:T	rs79219014	IL6R_8092_29	COVID_C2	31	-0.0591008	0.0189245	0.00179031	0.0460365	0.7069	0.0768	3.43499e-20	-0.028099	0.045915	0.540552	cis		Yes	intron_variant
1:154443202:A:G	rs558681060	IL6R_8092_29	COVID_C2	31	-0.0591008	0.0189245	0.00179031	0.0460365	0.9886	0.1634	1.44681e-09	0.15656	0.12755	0.219657	cis		No	intron_variant
1:154443593:G:A	rs116141616	IL6R_8092_29	COVID_C2	31	-0.0591008	0.0189245	0.00179031	0.0460365	-0.4697	0.0721	7.29015e-11	0.033828	0.041611	0.416242	cis		Yes	intron_variant
1:154444329:C:T	rs139952834	IL6R_8092_29	COVID_C2	31	-0.0591008	0.0189245	0.00179031	0.0460365	-0.6409	0.1072	2.2514e-09	0.057804	0.068287	0.397282	cis		Yes	intron_variant
1:154447857:G:A	rs113580743	IL6R_8092_29	COVID_C2	31	-0.0591008	0.0189245	0.00179031	0.0460365	-0.525	0.0605	4.03903e-18	0.006471	0.03935	0.869379	cis		Yes	intron_variant
1:154453714:G:A	rs12739228	IL6R_8092_29	COVID_C2	31	-0.0591008	0.0189245	0.00179031	0.0460365	-0.6425	0.0648	3.57814e-23	-0.016866	0.037223	0.650472	cis		Yes	intron_variant
1:154453788:C:T	rs4129267	IL6R_8092_29	COVID_C2	31	-0.0591008	0.0189245	0.00179031	0.0460365	1.1023	0.0159	0	-0.03555	0.013199	0.00707304	cis		Yes	intron_variant
1:154470538:C:T	rs79925547	IL6R_8092_29	COVID_C2	31	-0.0591008	0.0189245	0.00179031	0.0460365	0.779	0.1154	1.47404e-11	0.052387	0.071202	0.461882	cis		Yes	intron_variant
1:154497349:T:C	rs140615642	IL6R_8092_29	COVID_C2	31	-0.0591008	0.0189245	0.00179031	0.0460365	0.5638	0.0836	1.54064e-11	0.0040122	0.063258	0.949427	cis		Yes	intron_variant
1:154511179:A:G	rs116059394	IL6R_8092_29	COVID_C2	31	-0.0591008	0.0189245	0.00179031	0.0460365	-0.5916	0.056	4.36277e-26	0.045514	0.033217	0.170624	cis		Yes	intron_variant
1:154525677:T:C	rs75631461	IL6R_8092_29	COVID_C2	31	-0.0591008	0.0189245	0.00179031	0.0460365	0.6022	0.0958	3.25724e-10	0.0098566	0.04809	0.837602	cis		Yes	intron_variant
1:154529836:C:T	rs116710125	IL6R_8092_29	COVID_C2	31	-0.0591008	0.0189245	0.00179031	0.0460365	-0.5956	0.0558	1.34939e-26	-0.029882	0.035055	0.393974	cis		Yes	intron_variant
1:154536585:G:A	rs147830103	IL6R_8092_29	COVID_C2	31	-0.0591008	0.0189245	0.00179031	0.0460365	-0.6744	0.084	9.86142e-16	-0.0091992	0.044831	0.837418	cis		Yes	intron_variant
1:154543928:C:T	rs76289529	IL6R_8092_29	COVID_C2	31	-0.0591008	0.0189245	0.00179031	0.0460365	0.6686	0.0678	6.12164e-23	0.065402	0.040398	0.10546	cis		Yes	intron_variant
1:154607518:G:A	rs145558655	IL6R_8092_29	COVID_C2	31	-0.0591008	0.0189245	0.00179031	0.0460365	0.6572	0.1161	1.50812e-08	0.031139	0.082071	0.704379	cis		Yes	intron_variant
1:154716012:T:C	rs58892549	IL6R_8092_29	COVID_C2	31	-0.0591008	0.0189245	0.00179031	0.0460365	0.4402	0.0536	2.16294e-16	-0.011843	0.026303	0.652528	cis		Yes	intron_variant
1:154725148:C:G	rs141444337	IL6R_8092_29	COVID_C2	31	-0.0591008	0.0189245	0.00179031	0.0460365	-0.4572	0.0637	7.10527e-13	-0.033631	0.041054	0.412678	cis		Yes	intron_variant
1:154558912:G:A	rs145464582	IL6R_8092_29	COVID_B2	31	-0.0591008	0.0189245	0.00179031	0.0460365	0.6622	0.1007	4.83376e-11	-0.020542	0.14065	0.883882	cis		Yes	non_coding_transcript_exon_variant
1:154558912:G:A	rs145464582	IL6R_8092_29	COVID_C2	31	-0.0591008	0.0189245	0.00179031	0.0460365	0.6622	0.1007	4.83376e-11	-0.046232	0.069489	0.50585	cis		Yes	non_coding_transcript_exon_variant
1:154562004:C:T	rs149551556	IL6R_8092_29	COVID_B2	31	-0.0591008	0.0189245	0.00179031	0.0460365	-0.5627	0.0949	3.04045e-09	0.13097	0.09891	0.185459	cis		Yes	upstream_gene_variant
1:154562004:C:T	rs149551556	IL6R_8092_29	COVID_C2	31	-0.0591008	0.0189245	0.00179031	0.0460365	-0.5627	0.0949	3.04045e-09	0.025028	0.060008	0.676622	cis		Yes	upstream_gene_variant
1:154443202:A:G	rs558681060	IL6R_4139_71	COVID_B2	31	-0.056329	0.0189296	0.00292315	0.0615446	1.0061	0.1634	7.40037e-10	0.17325	0.24375	0.477227	cis		No	Not a missense variant or in LD with missense variants
1:154443202:A:G	rs558681060	IL6R_4139_71	COVID_C2	31	-0.056329	0.0189296	0.00292315	0.0615446	1.0061	0.1634	7.40037e-10	0.15656	0.12755	0.219657	cis		No	Not a missense variant or in LD with missense variants
1:153875146:G:A	rs111795967	IL6R_4139_71	COVID_B2	31	-0.056329	0.0189296	0.00292315	0.0615446	0.4209	0.0756	2.58479e-08	0.011813	0.067162	0.860382	cis		Yes	Not assessed
1:154182111:T:C	rs61806853	IL6R_4139_71	COVID_B2	31	-0.056329	0.0189296	0.00292315	0.0615446	0.4957	0.0573	5.10681e-18	0.042149	0.052511	0.422166	cis		Yes	Not assessed
1:154370041:C:T	rs79438587	IL6R_4139_71	COVID_B2	31	-0.056329	0.0189296	0.00292315	0.0615446	0.405	0.0338	4.40219e-33	-0.0075833	0.0365	0.835415	cis		Yes	Not assessed
1:154395747:G:A	rs147763778	IL6R_4139_71	COVID_B2	31	-0.056329	0.0189296	0.00292315	0.0615446	0.4284	0.0596	6.5786e-13	0.016105	0.063664	0.800292	cis		Yes	Not assessed
1:154420375:G:A	rs146389272	IL6R_4139_71	COVID_B2	31	-0.056329	0.0189296	0.00292315	0.0615446	0.4949	0.0697	1.24369e-12	0.010446	0.072898	0.886056	cis		Yes	Not assessed
1:154421941:T:A	rs4601580	IL6R_4139_71	COVID_B2	31	-0.056329	0.0189296	0.00292315	0.0615446	0.3392	0.0259	3.44681e-39	0.030346	0.026152	0.245898	cis		Yes	Not assessed
1:154431149:G:A	rs540848324	IL6R_4139_71	COVID_B2	31	-0.056329	0.0189296	0.00292315	0.0615446	0.8297	0.1446	9.5859e-09	0.18473	0.19679	0.347876	cis		Yes	Not assessed
1:154431978:C:T	rs116037345	IL6R_4139_71	COVID_B2	31	-0.056329	0.0189296	0.00292315	0.0615446	-0.5764	0.0714	6.86877e-16	-0.07279	0.060966	0.2325	cis		Yes	Not assessed
1:154436958:A:G	rs79778789	IL6R_4139_71	COVID_B2	31	-0.056329	0.0189296	0.00292315	0.0615446	0.7852	0.0887	8.57253e-19	-0.095142	0.091676	0.29936	cis		Yes	Not assessed
1:154439292:G:A	rs76093405	IL6R_4139_71	COVID_B2	31	-0.056329	0.0189296	0.00292315	0.0615446	-0.7066	0.0775	7.69344e-20	-0.08405	0.076458	0.271639	cis		Yes	Not assessed
1:154441428:G:A	rs114660934	IL6R_4139_71	COVID_B2	31	-0.056329	0.0189296	0.00292315	0.0615446	-0.4534	0.0592	1.87702e-14	0.087306	0.055838	0.117921	cis		Yes	Not assessed
1:154443199:G:T	rs79219014	IL6R_4139_71	COVID_B2	31	-0.056329	0.0189296	0.00292315	0.0615446	0.7582	0.0767	4.82293e-23	-0.0034654	0.071393	0.961286	cis		Yes	Not assessed
1:154443593:G:A	rs116141616	IL6R_4139_71	COVID_B2	31	-0.056329	0.0189296	0.00292315	0.0615446	-0.4498	0.0722	4.66683e-10	0.037899	0.065158	0.560804	cis		Yes	Not assessed
1:154444329:C:T	rs139952834	IL6R_4139_71	COVID_B2	31	-0.056329	0.0189296	0.00292315	0.0615446	-0.6506	0.1072	1.28685e-09	0.046198	0.12999	0.722293	cis		Yes	Not assessed
1:154447857:G:A	rs113580743	IL6R_4139_71	COVID_B2	31	-0.056329	0.0189296	0.00292315	0.0615446	-0.5141	0.0605	1.93683e-17	0.083711	0.073293	0.253395	cis		Yes	Not assessed
1:154452980:G:A	rs12126142	IL6R_4139_71	COVID_B2	31	-0.056329	0.0189296	0.00292315	0.0615446	1.1104	0.0156	0	-0.066898	0.021394	0.00176629	cis		Yes	Not assessed
1:154453714:G:A	rs12739228	IL6R_4139_71	COVID_B2	31	-0.056329	0.0189296	0.00292315	0.0615446	-0.6841	0.0647	3.9581e-26	0.014053	0.060148	0.815264	cis		Yes	Not assessed
1:154470538:C:T	rs79925547	IL6R_4139_71	COVID_B2	31	-0.056329	0.0189296	0.00292315	0.0615446	0.752	0.1155	7.47404e-11	-0.074897	0.11901	0.529131	cis		Yes	Not assessed
1:154497349:T:C	rs140615642	IL6R_4139_71	COVID_B2	31	-0.056329	0.0189296	0.00292315	0.0615446	0.5468	0.0836	6.12439e-11	-0.097382	0.12693	0.442957	cis		Yes	Not assessed
1:154525677:T:C	rs75631461	IL6R_4139_71	COVID_B2	31	-0.056329	0.0189296	0.00292315	0.0615446	0.6628	0.0956	4.1185e-12	-0.026714	0.089556	0.765479	cis		Yes	Not assessed
1:154529836:C:T	rs116710125	IL6R_4139_71	COVID_B2	31	-0.056329	0.0189296	0.00292315	0.0615446	-0.6158	0.0558	2.56635e-28	-0.047614	0.066365	0.473092	cis		Yes	Not assessed
1:154536585:G:A	rs147830103	IL6R_4139_71	COVID_B2	31	-0.056329	0.0189296	0.00292315	0.0615446	-0.6467	0.084	1.3734e-14	0.055926	0.072516	0.440575	cis		Yes	Not assessed
1:154543928:C:T	rs76289529	IL6R_4139_71	COVID_B2	31	-0.056329	0.0189296	0.00292315	0.0615446	0.6656	0.0678	9.50296e-23	0.075949	0.068312	0.266226	cis		Yes	Not assessed
1:154558912:G:A	rs145464582	IL6R_4139_71	COVID_B2	31	-0.056329	0.0189296	0.00292315	0.0615446	0.7285	0.1006	4.43583e-13	-0.020542	0.14065	0.883882	cis		Yes	Not assessed
1:154562004:C:T	rs149551556	IL6R_4139_71	COVID_B2	31	-0.056329	0.0189296	0.00292315	0.0615446	-0.6651	0.0947	2.16795e-12	0.13097	0.09891	0.185459	cis		Yes	Not assessed
1:154584187:G:A	rs1127311	IL6R_4139_71	COVID_B2	31	-0.056329	0.0189296	0.00292315	0.0615446	0.2543	0.0245	3.07085e-25	-0.027752	0.02173	0.201557	cis		Yes	Not assessed
1:154659152:ACTGCG:A	rs201012281	IL6R_4139_71	COVID_B2	31	-0.056329	0.0189296	0.00292315	0.0615446	0.7864	0.0884	5.79333e-19	-0.060411	0.10827	0.576867	cis		Yes	Not assessed
1:154694215:G:A	rs6690912	IL6R_4139_71	COVID_B2	31	-0.056329	0.0189296	0.00292315	0.0615446	0.3835	0.0683	1.96637e-08	-0.015883	0.064028	0.804085	cis		Yes	Not assessed
1:154710300:C:T	rs11264245	IL6R_4139_71	COVID_B2	31	-0.056329	0.0189296	0.00292315	0.0615446	0.4469	0.0548	3.48864e-16	-0.096491	0.049227	0.0499814	cis		Yes	Not assessed
1:154725148:C:G	rs141444337	IL6R_4139_71	COVID_B2	31	-0.056329	0.0189296	0.00292315	0.0615446	-0.4456	0.0637	2.6471e-12	0.0049014	0.073537	0.946859	cis		Yes	Not assessed
1:153875146:G:A	rs111795967	IL6R_4139_71	COVID_C2	31	-0.056329	0.0189296	0.00292315	0.0615446	0.4209	0.0756	2.58479e-08	0.029837	0.041844	0.475813	cis		Yes	Not assessed
1:154182111:T:C	rs61806853	IL6R_4139_71	COVID_C2	31	-0.056329	0.0189296	0.00292315	0.0615446	0.4957	0.0573	5.10681e-18	-0.0026723	0.033647	0.936697	cis		Yes	Not assessed
1:154370041:C:T	rs79438587	IL6R_4139_71	COVID_C2	31	-0.056329	0.0189296	0.00292315	0.0615446	0.405	0.0338	4.40219e-33	-0.02627	0.020288	0.195371	cis		Yes	Not assessed
1:154395747:G:A	rs147763778	IL6R_4139_71	COVID_C2	31	-0.056329	0.0189296	0.00292315	0.0615446	0.4284	0.0596	6.5786e-13	-0.022735	0.037237	0.541498	cis		Yes	Not assessed
1:154420375:G:A	rs146389272	IL6R_4139_71	COVID_C2	31	-0.056329	0.0189296	0.00292315	0.0615446	0.4949	0.0697	1.24369e-12	0.023594	0.040397	0.559184	cis		Yes	Not assessed
1:154421941:T:A	rs4601580	IL6R_4139_71	COVID_C2	31	-0.056329	0.0189296	0.00292315	0.0615446	0.3392	0.0259	3.44681e-39	0.009619	0.014823	0.516388	cis		Yes	Not assessed
1:154431149:G:A	rs540848324	IL6R_4139_71	COVID_C2	31	-0.056329	0.0189296	0.00292315	0.0615446	0.8297	0.1446	9.5859e-09	-0.099476	0.11193	0.374146	cis		Yes	Not assessed
1:154431978:C:T	rs116037345	IL6R_4139_71	COVID_C2	31	-0.056329	0.0189296	0.00292315	0.0615446	-0.5764	0.0714	6.86877e-16	-0.056808	0.039211	0.1474	cis		Yes	Not assessed
1:154436958:A:G	rs79778789	IL6R_4139_71	COVID_C2	31	-0.056329	0.0189296	0.00292315	0.0615446	0.7852	0.0887	8.57253e-19	-0.010044	0.054668	0.854227	cis		Yes	Not assessed
1:154439292:G:A	rs76093405	IL6R_4139_71	COVID_C2	31	-0.056329	0.0189296	0.00292315	0.0615446	-0.7066	0.0775	7.69344e-20	-0.067726	0.046099	0.141794	cis		Yes	Not assessed
1:154441428:G:A	rs114660934	IL6R_4139_71	COVID_C2	31	-0.056329	0.0189296	0.00292315	0.0615446	-0.4534	0.0592	1.87702e-14	0.042627	0.035035	0.223719	cis		Yes	Not assessed
1:154443199:G:T	rs79219014	IL6R_4139_71	COVID_C2	31	-0.056329	0.0189296	0.00292315	0.0615446	0.7582	0.0767	4.82293e-23	-0.028099	0.045915	0.540552	cis		Yes	Not assessed
1:154443593:G:A	rs116141616	IL6R_4139_71	COVID_C2	31	-0.056329	0.0189296	0.00292315	0.0615446	-0.4498	0.0722	4.66683e-10	0.033828	0.041611	0.416242	cis		Yes	Not assessed
1:154444329:C:T	rs139952834	IL6R_4139_71	COVID_C2	31	-0.056329	0.0189296	0.00292315	0.0615446	-0.6506	0.1072	1.28685e-09	0.057804	0.068287	0.397282	cis		Yes	Not assessed
1:154447857:G:A	rs113580743	IL6R_4139_71	COVID_C2	31	-0.056329	0.0189296	0.00292315	0.0615446	-0.5141	0.0605	1.93683e-17	0.006471	0.03935	0.869379	cis		Yes	Not assessed
1:154452980:G:A	rs12126142	IL6R_4139_71	COVID_C2	31	-0.056329	0.0189296	0.00292315	0.0615446	1.1104	0.0156	0	-0.036724	0.013229	0.00550284	cis		Yes	Not assessed
1:154453714:G:A	rs12739228	IL6R_4139_71	COVID_C2	31	-0.056329	0.0189296	0.00292315	0.0615446	-0.6841	0.0647	3.9581e-26	-0.016866	0.037223	0.650472	cis		Yes	Not assessed
1:154470538:C:T	rs79925547	IL6R_4139_71	COVID_C2	31	-0.056329	0.0189296	0.00292315	0.0615446	0.752	0.1155	7.47404e-11	0.052387	0.071202	0.461882	cis		Yes	Not assessed
1:154497349:T:C	rs140615642	IL6R_4139_71	COVID_C2	31	-0.056329	0.0189296	0.00292315	0.0615446	0.5468	0.0836	6.12439e-11	0.0040122	0.063258	0.949427	cis		Yes	Not assessed
1:154525677:T:C	rs75631461	IL6R_4139_71	COVID_C2	31	-0.056329	0.0189296	0.00292315	0.0615446	0.6628	0.0956	4.1185e-12	0.0098566	0.04809	0.837602	cis		Yes	Not assessed
1:154529836:C:T	rs116710125	IL6R_4139_71	COVID_C2	31	-0.056329	0.0189296	0.00292315	0.0615446	-0.6158	0.0558	2.56635e-28	-0.029882	0.035055	0.393974	cis		Yes	Not assessed
1:154536585:G:A	rs147830103	IL6R_4139_71	COVID_C2	31	-0.056329	0.0189296	0.00292315	0.0615446	-0.6467	0.084	1.3734e-14	-0.0091992	0.044831	0.837418	cis		Yes	Not assessed
1:154543928:C:T	rs76289529	IL6R_4139_71	COVID_C2	31	-0.056329	0.0189296	0.00292315	0.0615446	0.6656	0.0678	9.50296e-23	0.065402	0.040398	0.10546	cis		Yes	Not assessed
1:154558912:G:A	rs145464582	IL6R_4139_71	COVID_C2	31	-0.056329	0.0189296	0.00292315	0.0615446	0.7285	0.1006	4.43583e-13	-0.046232	0.069489	0.50585	cis		Yes	Not assessed
1:154562004:C:T	rs149551556	IL6R_4139_71	COVID_C2	31	-0.056329	0.0189296	0.00292315	0.0615446	-0.6651	0.0947	2.16795e-12	0.025028	0.060008	0.676622	cis		Yes	Not assessed
1:154584187:G:A	rs1127311	IL6R_4139_71	COVID_C2	31	-0.056329	0.0189296	0.00292315	0.0615446	0.2543	0.0245	3.07085e-25	-0.0023558	0.013538	0.861855	cis		Yes	Not assessed
1:154659152:ACTGCG:A	rs201012281	IL6R_4139_71	COVID_C2	31	-0.056329	0.0189296	0.00292315	0.0615446	0.7864	0.0884	5.79333e-19	-0.04559	0.067196	0.497478	cis		Yes	Not assessed
1:154694215:G:A	rs6690912	IL6R_4139_71	COVID_C2	31	-0.056329	0.0189296	0.00292315	0.0615446	0.3835	0.0683	1.96637e-08	-0.046602	0.040541	0.250349	cis		Yes	Not assessed
1:154710300:C:T	rs11264245	IL6R_4139_71	COVID_C2	31	-0.056329	0.0189296	0.00292315	0.0615446	0.4469	0.0548	3.48864e-16	-0.01367	0.031187	0.661152	cis		Yes	Not assessed
1:154725148:C:G	rs141444337	IL6R_4139_71	COVID_C2	31	-0.056329	0.0189296	0.00292315	0.0615446	-0.4456	0.0637	2.6471e-12	-0.033631	0.041054	0.412678	cis		Yes	Not assessed
17:66244612:C:T	rs182233516	DHX8_11601	COVID_C1	20	0.0553458	0.01923	0.0040008	0.146429	-0.9143	0.1454	3.21229e-10	-0.035781	0.11599	0.757714	trans	APOH	No	Not a missense variant or in LD with missense variants
17:66333420:AGTG:A	rs565504191	DHX8_11601	COVID_C1	20	0.0553458	0.01923	0.0040008	0.146429	-0.8902	0.1565	1.28401e-08	0.17454	0.23066	0.449231	trans	PRKCA	No	Not a missense variant or in LD with missense variants
17:66244612:C:T	rs182233516	DHX8_11601	COVID_C2	20	0.0553458	0.01923	0.0040008	0.146429	-0.9143	0.1454	3.21229e-10	-0.11157	0.096364	0.246947	trans	APOH	No	Not a missense variant or in LD with missense variants
17:66333420:AGTG:A	rs565504191	DHX8_11601	COVID_C2	20	0.0553458	0.01923	0.0040008	0.146429	-0.8902	0.1565	1.28401e-08	-0.11477	0.18202	0.528345	trans	PRKCA	No	Not a missense variant or in LD with missense variants
17:66244612:C:T	rs182233516	DHX8_11601	COVID_D1	20	0.0553458	0.01923	0.0040008	0.146429	-0.9143	0.1454	3.21229e-10	-0.03617	0.16088	0.822115	trans	APOH	No	Not a missense variant or in LD with missense variants
17:66266549:A:G	rs189573157	DHX8_11601	COVID_D1	20	0.0553458	0.01923	0.0040008	0.146429	-0.6766	0.1237	4.50837e-08	-0.059109	0.20113	0.768846	trans	PRKCA	No	Not a missense variant or in LD with missense variants
17:65768527:C:T	rs8077164	DHX8_11601	COVID_C1	20	0.0553458	0.01923	0.0040008	0.146429	-0.1556	0.0257	1.40877e-09	-0.012661	0.019604	0.518385	trans	AC004805.1	Yes	Not assessed
17:65798033:G:A	rs72831437	DHX8_11601	COVID_C1	20	0.0553458	0.01923	0.0040008	0.146429	0.2294	0.0394	5.80311e-09	0.062965	0.02932	0.0317527	trans	AC004805.1	Yes	Not assessed
17:65856259:C:G	rs62065092	DHX8_11601	COVID_C1	20	0.0553458	0.01923	0.0040008	0.146429	-0.3099	0.0317	1.42705e-22	0.0029428	0.021339	0.890314	trans	AXIN2	Yes	Not assessed
17:65902039:C:T	rs2241008	DHX8_11601	COVID_C1	20	0.0553458	0.01923	0.0040008	0.146429	0.2595	0.0411	2.72145e-10	0.050941	0.028814	0.0770734	trans	CEP112	Yes	Not assessed
17:66015037:G:A	rs192403798	DHX8_11601	COVID_C1	20	0.0553458	0.01923	0.0040008	0.146429	-0.6758	0.1203	1.93603e-08	-0.086079	0.17641	0.625586	trans	CEP112	Yes	Not assessed
17:66021941:C:T	rs11658899	DHX8_11601	COVID_C1	20	0.0553458	0.01923	0.0040008	0.146429	-0.6238	0.0632	5.6023e-23	-0.039988	0.045299	0.377368	trans	CEP112	Yes	Not assessed
17:66179884:G:C	rs76411329	DHX8_11601	COVID_C1	20	0.0553458	0.01923	0.0040008	0.146429	-0.5882	0.0951	6.20756e-10	-0.02994	0.075237	0.690673	trans	CEP112	Yes	Not assessed
17:66183489:A:G	rs11654248	DHX8_11601	COVID_C1	20	0.0553458	0.01923	0.0040008	0.146429	-0.1548	0.0273	1.42523e-08	0.0058698	0.019029	0.757728	trans	CEP112	Yes	Not assessed
17:66212228:A:G	rs8178861	DHX8_11601	COVID_C1	20	0.0553458	0.01923	0.0040008	0.146429	-0.5939	0.1003	3.1953e-09	-0.035706	0.080953	0.659162	trans	APOH	Yes	Not assessed
17:66217812:A:G	rs8077564	DHX8_11601	COVID_C1	20	0.0553458	0.01923	0.0040008	0.146429	-0.767	0.0236	1.06628e-231	-0.041794	0.016587	0.011746	trans	PRKCA	Yes	Not assessed
17:66222897:T:C	rs3785617	DHX8_11601	COVID_C1	20	0.0553458	0.01923	0.0040008	0.146429	0.2826	0.0254	9.37652e-29	-0.0048415	0.017335	0.780022	trans	PRKCA	Yes	Not assessed
17:66223855:C:T	rs8178836	DHX8_11601	COVID_C1	20	0.0553458	0.01923	0.0040008	0.146429	-0.6234	0.0912	8.17045e-12	0.019276	0.07105	0.786159	trans	APOH	Yes	Not assessed
17:66223928:G:A	rs148598427	DHX8_11601	COVID_C1	20	0.0553458	0.01923	0.0040008	0.146429	-0.9087	0.1322	6.25681e-12	-0.12046	0.16465	0.464405	trans	APOH	Yes	Not assessed
17:66228657:C:T	rs8178824	DHX8_11601	COVID_C1	20	0.0553458	0.01923	0.0040008	0.146429	-0.7714	0.0715	3.88786e-27	-0.018845	0.049215	0.701785	trans	PRKCA	Yes	Not assessed
17:66246630:C:T	rs117534989	DHX8_11601	COVID_C1	20	0.0553458	0.01923	0.0040008	0.146429	0.466	0.0815	1.07918e-08	0.054949	0.055362	0.320934	trans	APOH	Yes	Not assessed
17:66254300:G:A	rs117915045	DHX8_11601	COVID_C1	20	0.0553458	0.01923	0.0040008	0.146429	0.3741	0.0564	3.28979e-11	0.079794	0.038248	0.0369581	trans	PRKCA	Yes	Not assessed
17:66277053:C:G	rs139315861	DHX8_11601	COVID_C1	20	0.0553458	0.01923	0.0040008	0.146429	-0.6458	0.1035	4.38653e-10	0.018375	0.080778	0.820054	trans	PRKCA	Yes	Not assessed
6:160731873:C:T	rs4252129	DHX8_11601	COVID_C1	20	0.0553458	0.01923	0.0040008	0.146429	-0.725	0.0974	9.80285e-14	-0.17245	0.07973	0.030547	trans	PLG	Yes	Not assessed
17:65768527:C:T	rs8077164	DHX8_11601	COVID_C2	20	0.0553458	0.01923	0.0040008	0.146429	-0.1556	0.0257	1.40877e-09	-0.0078716	0.015394	0.609112	trans	AC004805.1	Yes	Not assessed
17:65798033:G:A	rs72831437	DHX8_11601	COVID_C2	20	0.0553458	0.01923	0.0040008	0.146429	0.2294	0.0394	5.80311e-09	0.024935	0.026037	0.338226	trans	AC004805.1	Yes	Not assessed
17:65856259:C:G	rs62065092	DHX8_11601	COVID_C2	20	0.0553458	0.01923	0.0040008	0.146429	-0.3099	0.0317	1.42705e-22	0.0069105	0.018486	0.708536	trans	AXIN2	Yes	Not assessed
17:65902039:C:T	rs2241008	DHX8_11601	COVID_C2	20	0.0553458	0.01923	0.0040008	0.146429	0.2595	0.0411	2.72145e-10	0.034994	0.022868	0.125952	trans	CEP112	Yes	Not assessed
17:66015037:G:A	rs192403798	DHX8_11601	COVID_C2	20	0.0553458	0.01923	0.0040008	0.146429	-0.6758	0.1203	1.93603e-08	-0.018422	0.14643	0.899884	trans	CEP112	Yes	Not assessed
17:66021941:C:T	rs11658899	DHX8_11601	COVID_C2	20	0.0553458	0.01923	0.0040008	0.146429	-0.6238	0.0632	5.6023e-23	-0.05594	0.039085	0.152362	trans	CEP112	Yes	Not assessed
17:66179884:G:C	rs76411329	DHX8_11601	COVID_C2	20	0.0553458	0.01923	0.0040008	0.146429	-0.5882	0.0951	6.20756e-10	0.001563	0.058987	0.978861	trans	CEP112	Yes	Not assessed
17:66183489:A:G	rs11654248	DHX8_11601	COVID_C2	20	0.0553458	0.01923	0.0040008	0.146429	-0.1548	0.0273	1.42523e-08	-0.010686	0.015734	0.497033	trans	CEP112	Yes	Not assessed
17:66212228:A:G	rs8178861	DHX8_11601	COVID_C2	20	0.0553458	0.01923	0.0040008	0.146429	-0.5939	0.1003	3.1953e-09	-0.00301	0.069939	0.965672	trans	APOH	Yes	Not assessed
17:66217812:A:G	rs8077564	DHX8_11601	COVID_C2	20	0.0553458	0.01923	0.0040008	0.146429	-0.767	0.0236	1.06628e-231	-0.025828	0.013528	0.056233	trans	PRKCA	Yes	Not assessed
17:66222897:T:C	rs3785617	DHX8_11601	COVID_C2	20	0.0553458	0.01923	0.0040008	0.146429	0.2826	0.0254	9.37652e-29	-0.015612	0.01396	0.263423	trans	PRKCA	Yes	Not assessed
17:66223855:C:T	rs8178836	DHX8_11601	COVID_C2	20	0.0553458	0.01923	0.0040008	0.146429	-0.6234	0.0912	8.17045e-12	0.05129	0.056699	0.365677	trans	APOH	Yes	Not assessed
17:66223928:G:A	rs148598427	DHX8_11601	COVID_C2	20	0.0553458	0.01923	0.0040008	0.146429	-0.9087	0.1322	6.25681e-12	-0.03992	0.10666	0.708201	trans	APOH	Yes	Not assessed
17:66228657:C:T	rs8178824	DHX8_11601	COVID_C2	20	0.0553458	0.01923	0.0040008	0.146429	-0.7714	0.0715	3.88786e-27	-0.029749	0.041347	0.471835	trans	PRKCA	Yes	Not assessed
17:66246630:C:T	rs117534989	DHX8_11601	COVID_C2	20	0.0553458	0.01923	0.0040008	0.146429	0.466	0.0815	1.07918e-08	0.008029	0.042693	0.850827	trans	APOH	Yes	Not assessed
17:66254300:G:A	rs117915045	DHX8_11601	COVID_C2	20	0.0553458	0.01923	0.0040008	0.146429	0.3741	0.0564	3.28979e-11	0.036097	0.0312	0.247291	trans	PRKCA	Yes	Not assessed
17:66277053:C:G	rs139315861	DHX8_11601	COVID_C2	20	0.0553458	0.01923	0.0040008	0.146429	-0.6458	0.1035	4.38653e-10	0.01258	0.066247	0.849391	trans	PRKCA	Yes	Not assessed
6:160731873:C:T	rs4252129	DHX8_11601	COVID_C2	20	0.0553458	0.01923	0.0040008	0.146429	-0.725	0.0974	9.80285e-14	-0.15771	0.067757	0.0199343	trans	PLG	Yes	Not assessed
17:65768527:C:T	rs8077164	DHX8_11601	COVID_D1	20	0.0553458	0.01923	0.0040008	0.146429	-0.1556	0.0257	1.40877e-09	0.0028414	0.028031	0.91926	trans	AC004805.1	Yes	Not assessed
17:65798033:G:A	rs72831437	DHX8_11601	COVID_D1	20	0.0553458	0.01923	0.0040008	0.146429	0.2294	0.0394	5.80311e-09	-0.066246	0.047475	0.162899	trans	AC004805.1	Yes	Not assessed
17:65856259:C:G	rs62065092	DHX8_11601	COVID_D1	20	0.0553458	0.01923	0.0040008	0.146429	-0.3099	0.0317	1.42705e-22	-0.025196	0.03555	0.478481	trans	AXIN2	Yes	Not assessed
17:65902039:C:T	rs2241008	DHX8_11601	COVID_D1	20	0.0553458	0.01923	0.0040008	0.146429	0.2595	0.0411	2.72145e-10	-0.034236	0.044648	0.443202	trans	CEP112	Yes	Not assessed
17:66015037:G:A	rs192403798	DHX8_11601	COVID_D1	20	0.0553458	0.01923	0.0040008	0.146429	-0.6758	0.1203	1.93603e-08	0.037428	0.24588	0.879013	trans	CEP112	Yes	Not assessed
17:66021941:C:T	rs11658899	DHX8_11601	COVID_D1	20	0.0553458	0.01923	0.0040008	0.146429	-0.6238	0.0632	5.6023e-23	0.11514	0.07995	0.149825	trans	CEP112	Yes	Not assessed
17:66179884:G:C	rs76411329	DHX8_11601	COVID_D1	20	0.0553458	0.01923	0.0040008	0.146429	-0.5882	0.0951	6.20756e-10	0.00043482	0.11479	0.996978	trans	CEP112	Yes	Not assessed
17:66183489:A:G	rs11654248	DHX8_11601	COVID_D1	20	0.0553458	0.01923	0.0040008	0.146429	-0.1548	0.0273	1.42523e-08	0.042108	0.02961	0.155001	trans	CEP112	Yes	Not assessed
17:66212228:A:G	rs8178861	DHX8_11601	COVID_D1	20	0.0553458	0.01923	0.0040008	0.146429	-0.5939	0.1003	3.1953e-09	0.096547	0.12058	0.423312	trans	APOH	Yes	Not assessed
17:66217812:A:G	rs8077564	DHX8_11601	COVID_D1	20	0.0553458	0.01923	0.0040008	0.146429	-0.767	0.0236	1.06628e-231	0.070805	0.028798	0.013945	trans	PRKCA	Yes	Not assessed
17:66222897:T:C	rs3785617	DHX8_11601	COVID_D1	20	0.0553458	0.01923	0.0040008	0.146429	0.2826	0.0254	9.37652e-29	-0.027957	0.02694	0.299386	trans	PRKCA	Yes	Not assessed
17:66223855:C:T	rs8178836	DHX8_11601	COVID_D1	20	0.0553458	0.01923	0.0040008	0.146429	-0.6234	0.0912	8.17045e-12	-0.083558	0.11325	0.460624	trans	APOH	Yes	Not assessed
17:66223928:G:A	rs148598427	DHX8_11601	COVID_D1	20	0.0553458	0.01923	0.0040008	0.146429	-0.9087	0.1322	6.25681e-12	0.0043272	0.20548	0.983199	trans	APOH	Yes	Not assessed
17:66228657:C:T	rs8178824	DHX8_11601	COVID_D1	20	0.0553458	0.01923	0.0040008	0.146429	-0.7714	0.0715	3.88786e-27	-0.046572	0.087513	0.594607	trans	PRKCA	Yes	Not assessed
17:66246630:C:T	rs117534989	DHX8_11601	COVID_D1	20	0.0553458	0.01923	0.0040008	0.146429	0.466	0.0815	1.07918e-08	-0.019448	0.11571	0.866524	trans	APOH	Yes	Not assessed
17:66254300:G:A	rs117915045	DHX8_11601	COVID_D1	20	0.0553458	0.01923	0.0040008	0.146429	0.3741	0.0564	3.28979e-11	-0.033464	0.058954	0.570287	trans	PRKCA	Yes	Not assessed
17:66277053:C:G	rs139315861	DHX8_11601	COVID_D1	20	0.0553458	0.01923	0.0040008	0.146429	-0.6458	0.1035	4.38653e-10	0.055925	0.1423	0.694314	trans	PRKCA	Yes	Not assessed
6:160731873:C:T	rs4252129	DHX8_11601	COVID_D1	20	0.0553458	0.01923	0.0040008	0.146429	-0.725	0.0974	9.80285e-14	-0.2027	0.19234	0.291946	trans	PLG	Yes	Not assessed
10:100069757:C:T	rs61751507	CAMK1_3592	COVID_A1	15	-0.505129	0.16338	0.0019898	0.165153	0.654	0.0591	1.83426e-28	-0.41981	0.37684	0.265268	trans	CPN1	Yes	Not assessed
14:99632702:C:T	rs72706367	CAMK1_3592	COVID_A1	15	-0.505129	0.16338	0.0019898	0.165153	0.4363	0.0751	6.26271e-09	-0.159	0.64678	0.805811	trans	CCDC85C	Yes	Not assessed
1:168945839:G:A	rs57904876	CAMK1_3592	COVID_A1	15	-0.505129	0.16338	0.0019898	0.165153	0.1687	0.0303	2.58188e-08	-0.36283	0.18455	0.0492957	trans	LINC00970	Yes	Not assessed
1:169110204:A:T	rs76258813	CAMK1_3592	COVID_A1	15	-0.505129	0.16338	0.0019898	0.165153	-0.4477	0.0578	9.50756e-15	0.24347	0.46753	0.602535	trans	ATP1B1	Yes	Not assessed
1:169111599:C:T	rs1200138	CAMK1_3592	COVID_A1	15	-0.505129	0.16338	0.0019898	0.165153	0.1671	0.0286	5.13746e-09	0.18248	0.17676	0.301903	trans	ATP1B1	Yes	Not assessed
1:169133062:T:G	rs17345087	CAMK1_3592	COVID_A1	15	-0.505129	0.16338	0.0019898	0.165153	-0.6745	0.074	7.87686e-20	1.0737	0.55365	0.0524634	trans	ATP1B1	Yes	Not assessed
1:169291503:G:A	rs111360116	CAMK1_3592	COVID_A1	15	-0.505129	0.16338	0.0019898	0.165153	-0.6931	0.0812	1.39292e-17	0.15583	0.54716	0.775799	trans	NME7	Yes	Not assessed
1:169296250:A:G	rs12093387	CAMK1_3592	COVID_A1	15	-0.505129	0.16338	0.0019898	0.165153	-0.6083	0.0718	2.40915e-17	0.16374	0.47315	0.729295	trans	NME7	Yes	Not assessed
1:169390903:A:G	rs35866785	CAMK1_3592	COVID_A1	15	-0.505129	0.16338	0.0019898	0.165153	0.3291	0.0383	8.4957e-18	-0.28002	0.27759	0.313093	trans	NME7	Yes	Not assessed
1:169414742:T:C	rs72704010	CAMK1_3592	COVID_A1	15	-0.505129	0.16338	0.0019898	0.165153	-0.428	0.0728	4.12451e-09	0.6706	0.54606	0.219421	trans	NME7	Yes	Not assessed
1:169486465:C:T	rs72706085	CAMK1_3592	COVID_A1	15	-0.505129	0.16338	0.0019898	0.165153	-0.7195	0.0963	7.93199e-14	-0.10237	0.65752	0.876277	trans	SLC19A2	Yes	Not assessed
1:169491627:C:T	rs12029101	CAMK1_3592	COVID_A1	15	-0.505129	0.16338	0.0019898	0.165153	0.3489	0.045	8.95112e-15	-0.07781	0.2699	0.773123	trans	NME7	Yes	Not assessed
1:169525262:C:T	rs2301518	CAMK1_3592	COVID_A1	15	-0.505129	0.16338	0.0019898	0.165153	0.3149	0.0404	6.46361e-15	-0.39512	0.20757	0.0569687	trans	F5	Yes	Not assessed
1:169531352:C:A	rs6427197	CAMK1_3592	COVID_A1	15	-0.505129	0.16338	0.0019898	0.165153	-0.3911	0.0515	3.0976e-14	0.053281	0.28571	0.852063	trans	SLC19A2	Yes	Not assessed
1:169542496:T:C	rs4525	CAMK1_3592	COVID_A1	15	-0.505129	0.16338	0.0019898	0.165153	-1.0486	0.0215	0	0.50812	0.18185	0.0052033	trans	F5	Yes	Not assessed
12:882544:T:C	rs12301299	DEFB119_13455	COVID_A1	13	0.862664	0.274421	0.00166898	0.165153	0.2542	0.0332	1.90881e-14	0.24666	0.21795	0.257749	trans	RAD52	Yes	Not assessed
14:106666170:A:G	rs4468504	DEFB119_13455	COVID_A1	13	0.862664	0.274421	0.00166898	0.165153	0.2274	0.0253	2.51444e-19	0.30889	0.17437	0.0764837	trans	IGHV4-61	Yes	Not assessed
3:94670075:AT:A	rs1159294805	DEFB119_13455	COVID_A1	13	0.862664	0.274421	0.00166898	0.165153	-0.6362	0.1089	5.15602e-09	-0.45339	0.67383	0.501039	trans	LINC00879	Yes	Not assessed
6:31303734:A:C	rs13200571	DEFB119_13455	COVID_A1	13	0.862664	0.274421	0.00166898	0.165153	-0.1889	0.0334	1.55223e-08	0.20209	0.19678	0.304428	trans	MICB	Yes	Not assessed
6:31347562:C:T	rs9265954	DEFB119_13455	COVID_A1	13	0.862664	0.274421	0.00166898	0.165153	-0.2709	0.0351	1.18217e-14	-0.88034	0.39686	0.0265369	trans	MICB	Yes	Not assessed
6:31396258:T:C	rs11757660	DEFB119_13455	COVID_A1	13	0.862664	0.274421	0.00166898	0.165153	0.158	0.0273	7.14222e-09	0.36444	0.14389	0.0113166	trans	MICB	Yes	Not assessed
6:31409810:G:A	rs12175489	DEFB119_13455	COVID_A1	13	0.862664	0.274421	0.00166898	0.165153	0.2192	0.0389	1.75098e-08	0.32722	0.19218	0.088629	trans	NCR3	Yes	Not assessed
6:31872244:T:A	rs2763981	DEFB119_13455	COVID_A1	13	0.862664	0.274421	0.00166898	0.165153	0.2678	0.0259	4.65662e-25	0.163	0.17944	0.363677	trans	HLA-DQA2	Yes	Not assessed
6:31953288:CG:C	rs1035595321	DEFB119_13455	COVID_A1	13	0.862664	0.274421	0.00166898	0.165153	0.4013	0.0515	6.58352e-15	0.69223	0.36163	0.0555954	trans	NCR3	Yes	Not assessed
6:31966200:A:C	rs9296004	DEFB119_13455	COVID_A1	13	0.862664	0.274421	0.00166898	0.165153	0.6062	0.0456	2.51275e-40	0.13125	0.2823	0.641981	trans	TNXB	Yes	Not assessed
6:32467267:T:C	rs9268979	DEFB119_13455	COVID_A1	13	0.862664	0.274421	0.00166898	0.165153	-0.1692	0.029	5.39577e-09	-0.10268	0.14835	0.488845	trans	HLA-DQA2	Yes	Not assessed
6:32624057:G:T	rs34106969	DEFB119_13455	COVID_A1	13	0.862664	0.274421	0.00166898	0.165153	0.186	0.0335	2.82034e-08	0.43483	0.19746	0.0276571	trans	HLA-DQA2	Yes	Not assessed
6:32624212:T:G	rs9271630	DEFB119_13455	COVID_A1	13	0.862664	0.274421	0.00166898	0.165153	-0.1722	0.0288	2.24282e-09	-0.43786	0.17529	0.0124925	trans	HLA-DQA2	Yes	Not assessed
10:100069757:C:T	rs61751507	CAMK1_3592	COVID_B2	15	-0.505129	0.16338	0.0019898	0.165153	0.654	0.0591	1.83426e-28	-0.043168	0.048246	0.370922	trans	CPN1	Yes	Not assessed
14:99633893:G:A	rs72706368	CAMK1_3592	COVID_B2	15	-0.505129	0.16338	0.0019898	0.165153	0.6514	0.1027	2.25706e-10	-0.056833	0.12541	0.650421	trans	CCDC85C	Yes	Not assessed
1:168945839:G:A	rs57904876	CAMK1_3592	COVID_B2	15	-0.505129	0.16338	0.0019898	0.165153	0.1687	0.0303	2.58188e-08	-0.02441	0.031427	0.437324	trans	LINC00970	Yes	Not assessed
1:169111599:C:T	rs1200138	CAMK1_3592	COVID_B2	15	-0.505129	0.16338	0.0019898	0.165153	0.1671	0.0286	5.13746e-09	-0.0054234	0.027742	0.845006	trans	ATP1B1	Yes	Not assessed
1:169133062:T:G	rs17345087	CAMK1_3592	COVID_B2	15	-0.505129	0.16338	0.0019898	0.165153	-0.6745	0.074	7.87686e-20	0.051462	0.07528	0.494223	trans	ATP1B1	Yes	Not assessed
1:169291503:G:A	rs111360116	CAMK1_3592	COVID_B2	15	-0.505129	0.16338	0.0019898	0.165153	-0.6931	0.0812	1.39292e-17	-0.029755	0.090112	0.741249	trans	NME7	Yes	Not assessed
1:169296250:A:G	rs12093387	CAMK1_3592	COVID_B2	15	-0.505129	0.16338	0.0019898	0.165153	-0.6083	0.0718	2.40915e-17	-0.018568	0.059542	0.755157	trans	NME7	Yes	Not assessed
1:169367460:C:G	rs17345510	CAMK1_3592	COVID_B2	15	-0.505129	0.16338	0.0019898	0.165153	-0.8097	0.0853	2.25819e-21	0.0037735	0.12079	0.975078	trans	NME7	Yes	Not assessed
1:169390903:A:G	rs35866785	CAMK1_3592	COVID_B2	15	-0.505129	0.16338	0.0019898	0.165153	0.3291	0.0383	8.4957e-18	0.004318	0.048137	0.928524	trans	NME7	Yes	Not assessed
1:169463062:G:A	rs2090515	CAMK1_3592	COVID_B2	15	-0.505129	0.16338	0.0019898	0.165153	-0.7375	0.1232	2.14799e-09	-0.21168	0.19624	0.280731	trans	SLC19A2	Yes	Not assessed
1:169486465:C:T	rs72706085	CAMK1_3592	COVID_B2	15	-0.505129	0.16338	0.0019898	0.165153	-0.7195	0.0963	7.93199e-14	0.21925	0.08803	0.0127517	trans	SLC19A2	Yes	Not assessed
1:169491627:C:T	rs12029101	CAMK1_3592	COVID_B2	15	-0.505129	0.16338	0.0019898	0.165153	0.3489	0.045	8.95112e-15	-0.07445	0.042901	0.0826716	trans	NME7	Yes	Not assessed
1:169513023:C:T	rs9332677	CAMK1_3592	COVID_B2	15	-0.505129	0.16338	0.0019898	0.165153	-0.9964	0.1163	1.05758e-17	0.12109	0.22405	0.58888	trans	BLZF1	Yes	Not assessed
1:169521144:A:G	rs9332700	CAMK1_3592	COVID_B2	15	-0.505129	0.16338	0.0019898	0.165153	-0.7355	0.1052	2.7207e-12	0.23751	0.13667	0.0822398	trans	F5	Yes	Not assessed
1:169525262:C:T	rs2301518	CAMK1_3592	COVID_B2	15	-0.505129	0.16338	0.0019898	0.165153	0.3149	0.0404	6.46361e-15	-0.034516	0.034445	0.316314	trans	F5	Yes	Not assessed
1:169531352:C:A	rs6427197	CAMK1_3592	COVID_B2	15	-0.505129	0.16338	0.0019898	0.165153	-0.3911	0.0515	3.0976e-14	-0.053235	0.048762	0.274951	trans	SLC19A2	Yes	Not assessed
1:169542496:T:C	rs4525	CAMK1_3592	COVID_B2	15	-0.505129	0.16338	0.0019898	0.165153	-1.0486	0.0215	0	0.052882	0.023142	0.0223064	trans	F5	Yes	Not assessed
12:882544:T:C	rs12301299	DEFB119_13455	COVID_D1	13	0.862664	0.274421	0.00166898	0.165153	0.2542	0.0332	1.90881e-14	0.016785	0.034635	0.627942	trans	RAD52	Yes	Not assessed
14:106714830:C:T	rs11845244	DEFB119_13455	COVID_D1	13	0.862664	0.274421	0.00166898	0.165153	0.2412	0.0261	2.4334e-20	-0.033853	0.034887	0.331866	trans	IGHV1-69	Yes	Not assessed
3:94670075:AT:A	rs1159294805	DEFB119_13455	COVID_D1	13	0.862664	0.274421	0.00166898	0.165153	-0.6362	0.1089	5.15602e-09	-0.53464	0.24923	0.0319395	trans	LINC00879	Yes	Not assessed
6:31303734:A:C	rs13200571	DEFB119_13455	COVID_D1	13	0.862664	0.274421	0.00166898	0.165153	-0.1889	0.0334	1.55223e-08	-0.00072232	0.047715	0.987922	trans	MICB	Yes	Not assessed
6:31347562:C:T	rs9265954	DEFB119_13455	COVID_D1	13	0.862664	0.274421	0.00166898	0.165153	-0.2709	0.0351	1.18217e-14	-0.081052	0.14174	0.567433	trans	MICB	Yes	Not assessed
6:31396258:T:C	rs11757660	DEFB119_13455	COVID_D1	13	0.862664	0.274421	0.00166898	0.165153	0.158	0.0273	7.14222e-09	-0.014228	0.031485	0.651343	trans	MICB	Yes	Not assessed
6:31409810:G:A	rs12175489	DEFB119_13455	COVID_D1	13	0.862664	0.274421	0.00166898	0.165153	0.2192	0.0389	1.75098e-08	0.070167	0.044832	0.117557	trans	NCR3	Yes	Not assessed
6:31872244:T:A	rs2763981	DEFB119_13455	COVID_D1	13	0.862664	0.274421	0.00166898	0.165153	0.2678	0.0259	4.65662e-25	0.057582	0.029923	0.0543121	trans	HLA-DQA2	Yes	Not assessed
6:31953288:CG:C	rs1035595321	DEFB119_13455	COVID_D1	13	0.862664	0.274421	0.00166898	0.165153	0.4013	0.0515	6.58352e-15	0.031958	0.10578	0.762562	trans	NCR3	Yes	Not assessed
6:31966200:A:C	rs9296004	DEFB119_13455	COVID_D1	13	0.862664	0.274421	0.00166898	0.165153	0.6062	0.0456	2.51275e-40	0.086988	0.04945	0.0785588	trans	TNXB	Yes	Not assessed
6:32467267:T:C	rs9268979	DEFB119_13455	COVID_D1	13	0.862664	0.274421	0.00166898	0.165153	-0.1692	0.029	5.39577e-09	0.045082	0.043848	0.303883	trans	HLA-DQA2	Yes	Not assessed
6:32624212:T:G	rs9271630	DEFB119_13455	COVID_D1	13	0.862664	0.274421	0.00166898	0.165153	-0.1722	0.0288	2.24282e-09	-0.075671	0.046677	0.104983	trans	HLA-DQA2	Yes	Not assessed
6:32651877:T:C	rs28418426	DEFB119_13455	COVID_D1	13	0.862664	0.274421	0.00166898	0.165153	0.174	0.031	1.9896e-08	0.080237	0.040351	0.0467591	trans	HLA-DQA2	Yes	Not assessed
10:100035604:T:A	rs10883437	MMP8_2954_56	COVID_A2	20	0.0712934	0.0277766	0.0102679	0.231028	-0.2228	0.0251	6.90008e-19	-0.032593	0.035506	0.358641	trans	DNMBP	Yes	Not assessed
10:100069757:C:T	rs61751507	MMP8_2954_56	COVID_A2	20	0.0712934	0.0277766	0.0102679	0.231028	-0.7764	0.0585	3.37401e-40	-0.071884	0.062574	0.250645	trans	CPN1	Yes	Not assessed
17:28367840:G:A	rs704	MMP8_2954_56	COVID_A2	20	0.0712934	0.0277766	0.0102679	0.231028	-0.2151	0.0244	1.19074e-18	-0.040582	0.027261	0.13658	trans	SARM1	Yes	Not assessed
6:31089812:A:G	rs115898869	MMP8_2954_56	COVID_A2	20	0.0712934	0.0277766	0.0102679	0.231028	0.4382	0.0722	1.28507e-09	-0.062153	0.092741	0.502744	trans	HLA-B	Yes	Not assessed
6:31202352:T:A	rs28362364	MMP8_2954_56	COVID_A2	20	0.0712934	0.0277766	0.0102679	0.231028	0.313	0.0533	4.29478e-09	0.054747	0.055574	0.324566	trans	AL662844.4	Yes	Not assessed
6:31299548:C:T	rs28367618	MMP8_2954_56	COVID_A2	20	0.0712934	0.0277766	0.0102679	0.231028	0.4777	0.0455	8.73915e-26	0.073951	0.038661	0.0557729	trans	HLA-C	Yes	Not assessed
6:31396999:A:G	rs2523461	MMP8_2954_56	COVID_A2	20	0.0712934	0.0277766	0.0102679	0.231028	0.1846	0.0262	1.84397e-12	0.058233	0.028797	0.0431567	trans	AL645933.2	Yes	Not assessed
6:31472775:T:G	rs3828886	MMP8_2954_56	COVID_A2	20	0.0712934	0.0277766	0.0102679	0.231028	0.1911	0.0291	5.13355e-11	0.046121	0.030298	0.127948	trans	MICA	Yes	Not assessed
6:31574990:A:C	rs4248161	MMP8_2954_56	COVID_A2	20	0.0712934	0.0277766	0.0102679	0.231028	0.932	0.1231	3.70133e-14	-0.14284	0.16918	0.398497	trans	HLA-C	Yes	Not assessed
6:31703721:T:C	rs28366156	MMP8_2954_56	COVID_A2	20	0.0712934	0.0277766	0.0102679	0.231028	0.2167	0.0358	1.42109e-09	0.0026228	0.040692	0.948608	trans	LY6G5C	Yes	Not assessed
6:31926849:A:G	rs3020644	MMP8_2954_56	COVID_A2	20	0.0712934	0.0277766	0.0102679	0.231028	-0.1945	0.0251	9.26161e-15	0.0054598	0.02841	0.847602	trans	TNXB	Yes	Not assessed
6:31946402:C:T	rs12614	MMP8_2954_56	COVID_A2	20	0.0712934	0.0277766	0.0102679	0.231028	1.3264	0.0368	1.74494e-284	0.07011	0.043314	0.105524	trans	CFB	Yes	Not assessed
6:32146738:A:T	rs9296009	MMP8_2954_56	COVID_A2	20	0.0712934	0.0277766	0.0102679	0.231028	0.1803	0.0294	8.64255e-10	0.015349	0.048264	0.750468	trans	TNXB	Yes	Not assessed
6:32182519:C:A	rs184003	MMP8_2954_56	COVID_A2	20	0.0712934	0.0277766	0.0102679	0.231028	0.3203	0.0511	3.65476e-10	-0.04883	0.046594	0.294644	trans	TNXB	Yes	Not assessed
6:32465982:C:T	rs35880697	MMP8_2954_56	COVID_A2	20	0.0712934	0.0277766	0.0102679	0.231028	0.3047	0.038	1.07113e-15	0.0031005	0.060977	0.959447	trans	HLA-DQA2	Yes	Not assessed
6:32731211:C:A	rs7751856	MMP8_2954_56	COVID_A2	20	0.0712934	0.0277766	0.0102679	0.231028	0.1389	0.0248	2.13357e-08	-0.021499	0.027737	0.438279	trans	HLA-DQB1-AS1	Yes	Not assessed
6:32854091:C:A	rs56376659	MMP8_2954_56	COVID_A2	20	0.0712934	0.0277766	0.0102679	0.231028	0.6157	0.1025	1.89187e-09	-0.089546	0.13395	0.503812	trans	PSMB9	Yes	Not assessed
6:32921245:T:C	rs55919316	MMP8_2954_56	COVID_A2	20	0.0712934	0.0277766	0.0102679	0.231028	0.7766	0.1066	3.21245e-13	0.22143	0.2817	0.431839	trans	BRD2	Yes	Not assessed
6:33233112:G:C	rs115806028	MMP8_2954_56	COVID_A2	20	0.0712934	0.0277766	0.0102679	0.231028	0.7591	0.0979	8.91614e-15	0.12199	0.11713	0.297647	trans	COL11A2	Yes	Not assessed
9:132180449:T:C	rs78237972	MMP8_2954_56	COVID_A2	20	0.0712934	0.0277766	0.0102679	0.231028	0.4619	0.0825	2.15856e-08	0.045244	0.069712	0.51633	trans	NTNG2	Yes	Not assessed
10:100035604:T:A	rs10883437	MMP8_2954_56	COVID_B2	20	0.0712934	0.0277766	0.0102679	0.231028	-0.2228	0.0251	6.90008e-19	-0.013443	0.025509	0.5982	trans	DNMBP	Yes	Not assessed
10:100069757:C:T	rs61751507	MMP8_2954_56	COVID_B2	20	0.0712934	0.0277766	0.0102679	0.231028	-0.7764	0.0585	3.37401e-40	-0.043168	0.048246	0.370922	trans	CPN1	Yes	Not assessed
17:28367840:G:A	rs704	MMP8_2954_56	COVID_B2	20	0.0712934	0.0277766	0.0102679	0.231028	-0.2151	0.0244	1.19074e-18	0.0034597	0.020694	0.867225	trans	SARM1	Yes	Not assessed
6:31089812:A:G	rs115898869	MMP8_2954_56	COVID_B2	20	0.0712934	0.0277766	0.0102679	0.231028	0.4382	0.0722	1.28507e-09	-0.01778	0.064898	0.784109	trans	HLA-B	Yes	Not assessed
6:31202352:T:A	rs28362364	MMP8_2954_56	COVID_B2	20	0.0712934	0.0277766	0.0102679	0.231028	0.313	0.0533	4.29478e-09	0.0032016	0.03968	0.935692	trans	AL662844.4	Yes	Not assessed
6:31270210:C:T	rs41556321	MMP8_2954_56	COVID_B2	20	0.0712934	0.0277766	0.0102679	0.231028	0.4103	0.0422	2.41181e-22	0.10311	0.059823	0.0847829	trans	HLA-C	Yes	Not assessed
6:31299548:C:T	rs28367618	MMP8_2954_56	COVID_B2	20	0.0712934	0.0277766	0.0102679	0.231028	0.4777	0.0455	8.73915e-26	0.033483	0.026463	0.205772	trans	HLA-C	Yes	Not assessed
6:31396999:A:G	rs2523461	MMP8_2954_56	COVID_B2	20	0.0712934	0.0277766	0.0102679	0.231028	0.1846	0.0262	1.84397e-12	0.031051	0.021684	0.15215	trans	AL645933.2	Yes	Not assessed
6:31472775:T:G	rs3828886	MMP8_2954_56	COVID_B2	20	0.0712934	0.0277766	0.0102679	0.231028	0.1911	0.0291	5.13355e-11	0.0057591	0.022879	0.801258	trans	MICA	Yes	Not assessed
6:31574990:A:C	rs4248161	MMP8_2954_56	COVID_B2	20	0.0712934	0.0277766	0.0102679	0.231028	0.932	0.1231	3.70133e-14	-0.034409	0.12264	0.779041	trans	HLA-C	Yes	Not assessed
6:31926849:A:G	rs3020644	MMP8_2954_56	COVID_B2	20	0.0712934	0.0277766	0.0102679	0.231028	-0.1945	0.0251	9.26161e-15	-0.0047557	0.021558	0.825404	trans	TNXB	Yes	Not assessed
6:31946402:C:T	rs12614	MMP8_2954_56	COVID_B2	20	0.0712934	0.0277766	0.0102679	0.231028	1.3264	0.0368	1.74494e-284	0.056268	0.031234	0.0716244	trans	CFB	Yes	Not assessed
6:32010969:G:A	rs28361039	MMP8_2954_56	COVID_B2	20	0.0712934	0.0277766	0.0102679	0.231028	0.1968	0.0266	1.37735e-13	-0.0032191	0.041257	0.937808	trans	C4A	Yes	Not assessed
6:32146738:A:T	rs9296009	MMP8_2954_56	COVID_B2	20	0.0712934	0.0277766	0.0102679	0.231028	0.1803	0.0294	8.64255e-10	0.017686	0.030072	0.556451	trans	TNXB	Yes	Not assessed
6:32182519:C:A	rs184003	MMP8_2954_56	COVID_B2	20	0.0712934	0.0277766	0.0102679	0.231028	0.3203	0.0511	3.65476e-10	-0.014116	0.033401	0.672571	trans	TNXB	Yes	Not assessed
6:32414163:A:T	rs28366194	MMP8_2954_56	COVID_B2	20	0.0712934	0.0277766	0.0102679	0.231028	0.2558	0.0423	1.4731e-09	-0.017387	0.036228	0.631275	trans	HLA-DRB5	Yes	Not assessed
6:32465982:C:T	rs35880697	MMP8_2954_56	COVID_B2	20	0.0712934	0.0277766	0.0102679	0.231028	0.3047	0.038	1.07113e-15	-0.0219	0.039616	0.580396	trans	HLA-DQA2	Yes	Not assessed
6:32731211:C:A	rs7751856	MMP8_2954_56	COVID_B2	20	0.0712934	0.0277766	0.0102679	0.231028	0.1389	0.0248	2.13357e-08	-0.033043	0.020827	0.112615	trans	HLA-DQB1-AS1	Yes	Not assessed
6:32921245:T:C	rs55919316	MMP8_2954_56	COVID_B2	20	0.0712934	0.0277766	0.0102679	0.231028	0.7766	0.1066	3.21245e-13	0.18437	0.18792	0.326539	trans	BRD2	Yes	Not assessed
6:33233112:G:C	rs115806028	MMP8_2954_56	COVID_B2	20	0.0712934	0.0277766	0.0102679	0.231028	0.7591	0.0979	8.91614e-15	0.063386	0.094928	0.504308	trans	COL11A2	Yes	Not assessed
9:132180449:T:C	rs78237972	MMP8_2954_56	COVID_B2	20	0.0712934	0.0277766	0.0102679	0.231028	0.4619	0.0825	2.15856e-08	0.11112	0.053904	0.0392608	trans	NTNG2	Yes	Not assessed
10:100035604:T:A	rs10883437	MMP8_2954_56	COVID_D1	20	0.0712934	0.0277766	0.0102679	0.231028	-0.2228	0.0251	6.90008e-19	0.02334	0.027917	0.403127	trans	DNMBP	Yes	Not assessed
10:100069757:C:T	rs61751507	MMP8_2954_56	COVID_D1	20	0.0712934	0.0277766	0.0102679	0.231028	-0.7764	0.0585	3.37401e-40	0.082548	0.060882	0.175141	trans	CPN1	Yes	Not assessed
17:28367840:G:A	rs704	MMP8_2954_56	COVID_D1	20	0.0712934	0.0277766	0.0102679	0.231028	-0.2151	0.0244	1.19074e-18	0.012103	0.026237	0.644587	trans	SARM1	Yes	Not assessed
6:31089812:A:G	rs115898869	MMP8_2954_56	COVID_D1	20	0.0712934	0.0277766	0.0102679	0.231028	0.4382	0.0722	1.28507e-09	0.057577	0.08061	0.475063	trans	HLA-B	Yes	Not assessed
6:31202352:T:A	rs28362364	MMP8_2954_56	COVID_D1	20	0.0712934	0.0277766	0.0102679	0.231028	0.313	0.0533	4.29478e-09	-0.12037	0.067029	0.0725279	trans	AL662844.4	Yes	Not assessed
6:31299548:C:T	rs28367618	MMP8_2954_56	COVID_D1	20	0.0712934	0.0277766	0.0102679	0.231028	0.4777	0.0455	8.73915e-26	0.019552	0.049101	0.690483	trans	HLA-C	Yes	Not assessed
6:31396999:A:G	rs2523461	MMP8_2954_56	COVID_D1	20	0.0712934	0.0277766	0.0102679	0.231028	0.1846	0.0262	1.84397e-12	-0.030694	0.032045	0.338143	trans	AL645933.2	Yes	Not assessed
6:31472775:T:G	rs3828886	MMP8_2954_56	COVID_D1	20	0.0712934	0.0277766	0.0102679	0.231028	0.1911	0.0291	5.13355e-11	0.044631	0.033445	0.182053	trans	MICA	Yes	Not assessed
6:31574990:A:C	rs4248161	MMP8_2954_56	COVID_D1	20	0.0712934	0.0277766	0.0102679	0.231028	0.932	0.1231	3.70133e-14	-0.13167	0.15632	0.399614	trans	HLA-C	Yes	Not assessed
6:31926849:A:G	rs3020644	MMP8_2954_56	COVID_D1	20	0.0712934	0.0277766	0.0102679	0.231028	-0.1945	0.0251	9.26161e-15	0.00070907	0.028243	0.97997	trans	TNXB	Yes	Not assessed
6:31946402:C:T	rs12614	MMP8_2954_56	COVID_D1	20	0.0712934	0.0277766	0.0102679	0.231028	1.3264	0.0368	1.74494e-284	-0.065249	0.042689	0.126395	trans	CFB	Yes	Not assessed
6:32010969:G:A	rs28361039	MMP8_2954_56	COVID_D1	20	0.0712934	0.0277766	0.0102679	0.231028	0.1968	0.0266	1.37735e-13	-0.021089	0.03555	0.553033	trans	C4A	Yes	Not assessed
6:32146738:A:T	rs9296009	MMP8_2954_56	COVID_D1	20	0.0712934	0.0277766	0.0102679	0.231028	0.1803	0.0294	8.64255e-10	-0.01147	0.033539	0.732358	trans	TNXB	Yes	Not assessed
6:32182519:C:A	rs184003	MMP8_2954_56	COVID_D1	20	0.0712934	0.0277766	0.0102679	0.231028	0.3203	0.0511	3.65476e-10	0.052965	0.078402	0.499322	trans	TNXB	Yes	Not assessed
6:32414163:A:T	rs28366194	MMP8_2954_56	COVID_D1	20	0.0712934	0.0277766	0.0102679	0.231028	0.2558	0.0423	1.4731e-09	0.082194	0.063916	0.198454	trans	HLA-DRB5	Yes	Not assessed
6:32465982:C:T	rs35880697	MMP8_2954_56	COVID_D1	20	0.0712934	0.0277766	0.0102679	0.231028	0.3047	0.038	1.07113e-15	0.10969	0.04947	0.0266024	trans	HLA-DQA2	Yes	Not assessed
6:32731211:C:A	rs7751856	MMP8_2954_56	COVID_D1	20	0.0712934	0.0277766	0.0102679	0.231028	0.1389	0.0248	2.13357e-08	0.034814	0.038133	0.361262	trans	HLA-DQB1-AS1	Yes	Not assessed
6:32921245:T:C	rs55919316	MMP8_2954_56	COVID_D1	20	0.0712934	0.0277766	0.0102679	0.231028	0.7766	0.1066	3.21245e-13	-0.39329	0.19173	0.0402407	trans	BRD2	Yes	Not assessed
6:33233112:G:C	rs115806028	MMP8_2954_56	COVID_D1	20	0.0712934	0.0277766	0.0102679	0.231028	0.7591	0.0979	8.91614e-15	-0.13072	0.089204	0.14281	trans	COL11A2	Yes	Not assessed
9:132180449:T:C	rs78237972	MMP8_2954_56	COVID_D1	20	0.0712934	0.0277766	0.0102679	0.231028	0.4619	0.0825	2.15856e-08	0.012509	0.08592	0.884246	trans	NTNG2	Yes	Not assessed
19:44633662:C:T	rs62119276	C5orf38_6378	COVID_B2	11	0.0628061	0.0277864	0.0238017	0.267769	-0.3836	0.0583	4.71209e-11	-0.067327	0.047157	0.153372	trans	PVR	Yes	Not assessed
19:44656818:C:A	rs73048351	C5orf38_6378	COVID_B2	11	0.0628061	0.0277864	0.0238017	0.267769	-0.7294	0.1216	1.99326e-09	-0.14872	0.18168	0.413025	trans	PVR	Yes	Not assessed
19:44800804:G:A	rs12327715	C5orf38_6378	COVID_B2	11	0.0628061	0.0277864	0.0238017	0.267769	-0.2886	0.0435	3.25642e-11	0.0019902	0.054814	0.971037	trans	NECTIN2	Yes	Not assessed
19:44825957:T:G	rs10402271	C5orf38_6378	COVID_B2	11	0.0628061	0.0277864	0.0238017	0.267769	0.2397	0.0259	2.14579e-20	0.027443	0.025234	0.276798	trans	NECTIN2	Yes	Not assessed
19:44843409:C:G	rs148601586	C5orf38_6378	COVID_B2	11	0.0628061	0.0277864	0.0238017	0.267769	0.6406	0.102	3.3772e-10	0.12438	0.11083	0.261752	trans	AC011481.3	Yes	Not assessed
19:44857231:T:G	rs375972689	C5orf38_6378	COVID_B2	11	0.0628061	0.0277864	0.0238017	0.267769	0.8352	0.1316	2.20262e-10	0.095541	0.10189	0.348405	trans	NECTIN2	Yes	Not assessed
19:44908684:T:C	rs429358	C5orf38_6378	COVID_B2	11	0.0628061	0.0277864	0.0238017	0.267769	0.8236	0.0306	1.46475e-159	0.032263	0.02992	0.280896	trans	APOE	Yes	Not assessed
19:44909976:G:T	rs1065853	C5orf38_6378	COVID_B2	11	0.0628061	0.0277864	0.0238017	0.267769	-1.2546	0.0411	1.19412e-204	-0.11361	0.048147	0.0182923	trans	APOE	Yes	Not assessed
19:44935386:A:G	rs4263041	C5orf38_6378	COVID_B2	11	0.0628061	0.0277864	0.0238017	0.267769	-0.2746	0.0306	2.86311e-19	0.0057131	0.032716	0.861373	trans	NECTIN2	Yes	Not assessed
19:44942260:G:A	rs79429216	C5orf38_6378	COVID_B2	11	0.0628061	0.0277864	0.0238017	0.267769	0.6099	0.1093	2.40443e-08	-0.012754	0.1112	0.908687	trans	APOC4	Yes	Not assessed
19:44947520:C:G	rs11879392	C5orf38_6378	COVID_B2	11	0.0628061	0.0277864	0.0238017	0.267769	-0.2277	0.0363	3.54778e-10	-0.0012604	0.031679	0.968263	trans	APOC4-APOC2	Yes	Not assessed
19:51477049:T:G	rs115494840	SIGLEC14_8248_222_3	COVID_B2	19	0.0549028	0.0241233	0.0228505	0.267769	-0.2956	0.0451	5.58946e-11	0.031398	0.038221	0.41137	cis		Yes	Not assessed
19:51502415:G:A	rs1551556	SIGLEC14_8248_222_3	COVID_B2	19	0.0549028	0.0241233	0.0228505	0.267769	0.2275	0.0252	1.75193e-19	0.0242	0.021346	0.25692	cis		Yes	Not assessed
19:51508750:C:G	rs116875108	SIGLEC14_8248_222_3	COVID_B2	19	0.0549028	0.0241233	0.0228505	0.267769	0.5171	0.0845	9.38537e-10	0.045639	0.098266	0.64233	cis		Yes	Not assessed
19:51556454:T:A	rs12980547	SIGLEC14_8248_222_3	COVID_B2	19	0.0549028	0.0241233	0.0228505	0.267769	0.4539	0.0828	4.2082e-08	0.24431	0.11469	0.033157	cis		Yes	Not assessed
19:51573721:C:T	rs8110809	SIGLEC14_8248_222_3	COVID_B2	19	0.0549028	0.0241233	0.0228505	0.267769	-0.2389	0.0246	2.69655e-22	-0.033673	0.021256	0.113156	cis		Yes	Not assessed
19:51593650:G:A	rs57351606	SIGLEC14_8248_222_3	COVID_B2	19	0.0549028	0.0241233	0.0228505	0.267769	-0.3857	0.0441	2.20987e-18	-0.05237	0.037604	0.163719	cis		Yes	Not assessed
19:51599350:C:G	rs55712999	SIGLEC14_8248_222_3	COVID_B2	19	0.0549028	0.0241233	0.0228505	0.267769	-0.2	0.026	1.44505e-14	-0.0057508	0.027025	0.831486	cis		Yes	Not assessed
19:51600530:A:G	rs11672546	SIGLEC14_8248_222_3	COVID_B2	19	0.0549028	0.0241233	0.0228505	0.267769	0.333	0.0482	4.89068e-12	-0.00032545	0.048975	0.994698	cis		Yes	Not assessed
19:51611832:T:A	rs74861892	SIGLEC14_8248_222_3	COVID_B2	19	0.0549028	0.0241233	0.0228505	0.267769	-1.2673	0.1611	3.64577e-15	-0.42845	0.23945	0.0735651	cis		Yes	Not assessed
19:51612691:C:G	rs73050865	SIGLEC14_8248_222_3	COVID_B2	19	0.0549028	0.0241233	0.0228505	0.267769	-1.0255	0.0691	7.97862e-50	0.016217	0.059107	0.783803	cis		Yes	Not assessed
19:51617075:G:A	rs181481353	SIGLEC14_8248_222_3	COVID_B2	19	0.0549028	0.0241233	0.0228505	0.267769	-0.8672	0.1115	7.39259e-15	-0.01008	0.14095	0.942988	cis		Yes	Not assessed
19:51619189:C:T	rs138536366	SIGLEC14_8248_222_3	COVID_B2	19	0.0549028	0.0241233	0.0228505	0.267769	0.2719	0.0378	6.33265e-13	-0.019791	0.036474	0.587401	cis		Yes	Not assessed
19:51627384:T:A	rs1106476	SIGLEC14_8248_222_3	COVID_B2	19	0.0549028	0.0241233	0.0228505	0.267769	-1.1918	0.0317	0	-0.069527	0.034612	0.0445632	cis		Yes	Not assessed
19:51628480:A:G	rs4284742	SIGLEC14_8248_222_3	COVID_B2	19	0.0549028	0.0241233	0.0228505	0.267769	-0.3876	0.0304	3.11745e-37	-0.052812	0.029409	0.07253	cis		Yes	Not assessed
19:51657400:T:C	rs142507298	SIGLEC14_8248_222_3	COVID_B2	19	0.0549028	0.0241233	0.0228505	0.267769	-1.2719	0.1339	2.1216e-21	-0.030176	0.19463	0.876787	cis		Yes	Not assessed
19:51668989:C:T	rs10409116	SIGLEC14_8248_222_3	COVID_B2	19	0.0549028	0.0241233	0.0228505	0.267769	-0.2475	0.0268	2.58106e-20	-0.0021971	0.023272	0.924784	cis		Yes	Not assessed
19:51676686:T:C	rs12974234	SIGLEC14_8248_222_3	COVID_B2	19	0.0549028	0.0241233	0.0228505	0.267769	-0.2724	0.0257	3.0047e-26	0.0015185	0.027119	0.955347	cis		Yes	Not assessed
19:51712063:G:A	rs7252881	SIGLEC14_8248_222_3	COVID_B2	19	0.0549028	0.0241233	0.0228505	0.267769	0.2458	0.0273	2.1831e-19	0.04228	0.029353	0.149755	cis		Yes	Not assessed
19:51894424:G:A	rs148610266	SIGLEC14_8248_222_3	COVID_B2	19	0.0549028	0.0241233	0.0228505	0.267769	-0.5082	0.066	1.36066e-14	0.086623	0.093353	0.353455	cis		Yes	Not assessed
19:44633662:C:T	rs62119276	C5orf38_6378	COVID_C1	11	0.0628061	0.0277864	0.0238017	0.267769	-0.3836	0.0583	4.71209e-11	-0.048084	0.034867	0.167873	trans	PVR	Yes	Not assessed
19:44656818:C:A	rs73048351	C5orf38_6378	COVID_C1	11	0.0628061	0.0277864	0.0238017	0.267769	-0.7294	0.1216	1.99326e-09	0.054466	0.10773	0.613152	trans	PVR	Yes	Not assessed
19:44735929:A:G	rs2927436	C5orf38_6378	COVID_C1	11	0.0628061	0.0277864	0.0238017	0.267769	-0.1892	0.0262	5.14649e-13	0.016324	0.016213	0.314009	trans	BCL3	Yes	Not assessed
19:44799256:A:G	rs2965112	C5orf38_6378	COVID_C1	11	0.0628061	0.0277864	0.0238017	0.267769	-0.2173	0.0392	2.96709e-08	0.036284	0.021797	0.095986	trans	CBLC	Yes	Not assessed
19:44825957:T:G	rs10402271	C5orf38_6378	COVID_C1	11	0.0628061	0.0277864	0.0238017	0.267769	0.2397	0.0259	2.14579e-20	0.037726	0.016793	0.02467	trans	NECTIN2	Yes	Not assessed
19:44843409:C:G	rs148601586	C5orf38_6378	COVID_C1	11	0.0628061	0.0277864	0.0238017	0.267769	0.6406	0.102	3.3772e-10	0.0847	0.080283	0.291417	trans	AC011481.3	Yes	Not assessed
19:44857231:T:G	rs375972689	C5orf38_6378	COVID_C1	11	0.0628061	0.0277864	0.0238017	0.267769	0.8352	0.1316	2.20262e-10	0.02963	0.076221	0.69747	trans	NECTIN2	Yes	Not assessed
19:44908684:T:C	rs429358	C5orf38_6378	COVID_C1	11	0.0628061	0.0277864	0.0238017	0.267769	0.8236	0.0306	1.46475e-159	0.045095	0.023164	0.0515622	trans	APOE	Yes	Not assessed
19:44909976:G:T	rs1065853	C5orf38_6378	COVID_C1	11	0.0628061	0.0277864	0.0238017	0.267769	-1.2546	0.0411	1.19412e-204	-0.031808	0.036052	0.377625	trans	APOE	Yes	Not assessed
19:44935386:A:G	rs4263041	C5orf38_6378	COVID_C1	11	0.0628061	0.0277864	0.0238017	0.267769	-0.2746	0.0306	2.86311e-19	-0.076873	0.022857	0.000770404	trans	NECTIN2	Yes	Not assessed
19:44942260:G:A	rs79429216	C5orf38_6378	COVID_C1	11	0.0628061	0.0277864	0.0238017	0.267769	0.6099	0.1093	2.40443e-08	-0.061015	0.090547	0.500407	trans	APOC4	Yes	Not assessed
19:44947520:C:G	rs11879392	C5orf38_6378	COVID_C1	11	0.0628061	0.0277864	0.0238017	0.267769	-0.2277	0.0363	3.54778e-10	-0.021552	0.023634	0.361818	trans	APOC4-APOC2	Yes	Not assessed
19:44861785:A:G	rs538568659	CTF1_13732	COVID_C1	10	0.0698465	0.0317022	0.0275804	0.292028	1.0874	0.1482	2.17812e-13	0.084576	0.16539	0.60909	trans	NECTIN2	No	Not a missense variant or in LD with missense variants
19:44638437:G:A	rs59328593	CTF1_13732	COVID_B2	10	0.0698465	0.0317022	0.0275804	0.292028	-0.3772	0.0581	8.45611e-11	-0.061362	0.046509	0.18705	trans	PVR	Yes	Not assessed
19:44746404:C:T	rs12459810	CTF1_13732	COVID_B2	10	0.0698465	0.0317022	0.0275804	0.292028	0.1581	0.0279	1.45602e-08	-0.0054125	0.032424	0.867426	trans	CEACAM19	Yes	Not assessed
19:44812964:A:G	rs528070791	CTF1_13732	COVID_B2	10	0.0698465	0.0317022	0.0275804	0.292028	0.5675	0.0976	6.07975e-09	-0.040752	0.17126	0.811917	trans	BCAM	Yes	Not assessed
19:44838283:A:G	rs12462274	CTF1_13732	COVID_B2	10	0.0698465	0.0317022	0.0275804	0.292028	0.2501	0.0263	1.91571e-21	0.050704	0.035074	0.148281	trans	NECTIN2	Yes	Not assessed
19:44857231:T:G	rs375972689	CTF1_13732	COVID_B2	10	0.0698465	0.0317022	0.0275804	0.292028	0.8019	0.1317	1.13733e-09	0.095541	0.10189	0.348405	trans	NECTIN2	Yes	Not assessed
19:44879709:C:T	rs3852860	CTF1_13732	COVID_B2	10	0.0698465	0.0317022	0.0275804	0.292028	-0.1365	0.0248	3.71202e-08	-0.0062309	0.024801	0.801632	trans	NECTIN2	Yes	Not assessed
19:44908684:T:C	rs429358	CTF1_13732	COVID_B2	10	0.0698465	0.0317022	0.0275804	0.292028	0.7994	0.0308	1.61569e-148	0.032263	0.02992	0.280896	trans	APOE	Yes	Not assessed
19:44909976:G:T	rs1065853	CTF1_13732	COVID_B2	10	0.0698465	0.0317022	0.0275804	0.292028	-0.9247	0.0436	7.93502e-100	-0.11361	0.048147	0.0182923	trans	APOE	Yes	Not assessed
19:44935386:A:G	rs4263041	CTF1_13732	COVID_B2	10	0.0698465	0.0317022	0.0275804	0.292028	-0.1884	0.0308	9.54233e-10	0.0057131	0.032716	0.861373	trans	NECTIN2	Yes	Not assessed
19:44942260:G:A	rs79429216	CTF1_13732	COVID_B2	10	0.0698465	0.0317022	0.0275804	0.292028	0.6085	0.1093	2.58797e-08	-0.012754	0.1112	0.908687	trans	APOC4	Yes	Not assessed
19:44638437:G:A	rs59328593	CTF1_13732	COVID_C1	10	0.0698465	0.0317022	0.0275804	0.292028	-0.3772	0.0581	8.45611e-11	-0.052347	0.034587	0.130156	trans	PVR	Yes	Not assessed
19:44746404:C:T	rs12459810	CTF1_13732	COVID_C1	10	0.0698465	0.0317022	0.0275804	0.292028	0.1581	0.0279	1.45602e-08	-0.0038861	0.020702	0.851099	trans	CEACAM19	Yes	Not assessed
19:44812964:A:G	rs528070791	CTF1_13732	COVID_C1	10	0.0698465	0.0317022	0.0275804	0.292028	0.5675	0.0976	6.07975e-09	0.04775	0.11984	0.6903	trans	BCAM	Yes	Not assessed
19:44838283:A:G	rs12462274	CTF1_13732	COVID_C1	10	0.0698465	0.0317022	0.0275804	0.292028	0.2501	0.0263	1.91571e-21	0.036888	0.018077	0.0412902	trans	NECTIN2	Yes	Not assessed
19:44857231:T:G	rs375972689	CTF1_13732	COVID_C1	10	0.0698465	0.0317022	0.0275804	0.292028	0.8019	0.1317	1.13733e-09	0.02963	0.076221	0.69747	trans	NECTIN2	Yes	Not assessed
19:44879709:C:T	rs3852860	CTF1_13732	COVID_C1	10	0.0698465	0.0317022	0.0275804	0.292028	-0.1365	0.0248	3.71202e-08	-0.0058624	0.016545	0.723091	trans	NECTIN2	Yes	Not assessed
19:44908684:T:C	rs429358	CTF1_13732	COVID_C1	10	0.0698465	0.0317022	0.0275804	0.292028	0.7994	0.0308	1.61569e-148	0.045095	0.023164	0.0515622	trans	APOE	Yes	Not assessed
19:44909976:G:T	rs1065853	CTF1_13732	COVID_C1	10	0.0698465	0.0317022	0.0275804	0.292028	-0.9247	0.0436	7.93502e-100	-0.031808	0.036052	0.377625	trans	APOE	Yes	Not assessed
19:44935386:A:G	rs4263041	CTF1_13732	COVID_C1	10	0.0698465	0.0317022	0.0275804	0.292028	-0.1884	0.0308	9.54233e-10	-0.076873	0.022857	0.000770404	trans	NECTIN2	Yes	Not assessed
19:44942260:G:A	rs79429216	CTF1_13732	COVID_C1	10	0.0698465	0.0317022	0.0275804	0.292028	0.6085	0.1093	2.58797e-08	-0.061015	0.090547	0.500407	trans	APOC4	Yes	Not assessed
19:45070855:T:G	rs201269048	CTF1_13732	COVID_C1	10	0.0698465	0.0317022	0.0275804	0.292028	-0.343	0.0557	7.36744e-10	-0.081745	0.046602	0.0794118	trans	CLASRP	Yes	Not assessed
3:99083096:G:A	rs190118085	ST3GAL6_6947_4_3	COVID_A2	11	-0.0765973	0.0321152	0.0170754	0.307357	-1.2083	0.1622	9.37336e-14	0.38156	0.28456	0.17996	cis		No	Not a missense variant or in LD with missense variants
3:99981556:A:G	rs559043036	ST3GAL6_6947_4_3	COVID_A2	11	-0.0765973	0.0321152	0.0170754	0.307357	-1.1996	0.1525	3.6549e-15	-0.1862	0.33736	0.580994	trans	FILIP1L	No	Not a missense variant or in LD with missense variants
3:99083096:G:A	rs190118085	ST3GAL6_6947_4_3	COVID_B2	11	-0.0765973	0.0321152	0.0170754	0.307357	-1.2083	0.1622	9.37336e-14	0.091405	0.24014	0.703476	cis		No	Not a missense variant or in LD with missense variants
3:99981556:A:G	rs559043036	ST3GAL6_6947_4_3	COVID_B2	11	-0.0765973	0.0321152	0.0170754	0.307357	-1.1996	0.1525	3.6549e-15	-0.25483	0.2616	0.329997	trans	FILIP1L	No	Not a missense variant or in LD with missense variants
1:161214307:A:G	rs1136224	FCGR2A_3309	COVID_A2	35	0.0692776	0.0286753	0.0156951	0.307357	-0.2511	0.0349	6.25329e-13	-0.054409	0.052839	0.303145	cis		Yes	Not assessed
1:161284456:A:G	rs41270859	FCGR2A_3309	COVID_A2	35	0.0692776	0.0286753	0.0156951	0.307357	0.555	0.0865	1.39732e-10	0.25094	0.10197	0.0138581	cis		Yes	Not assessed
1:161346203:G:GA	rs200745199	FCGR2A_3309	COVID_A2	35	0.0692776	0.0286753	0.0156951	0.307357	0.5903	0.0644	4.90219e-20	-0.076999	0.11517	0.503771	cis		Yes	Not assessed
1:161362517:G:C	rs201210474	FCGR2A_3309	COVID_A2	35	0.0692776	0.0286753	0.0156951	0.307357	-0.7365	0.1045	1.81707e-12	0.17742	0.24706	0.47268	cis		Yes	Not assessed
1:161381320:G:A	rs61802089	FCGR2A_3309	COVID_A2	35	0.0692776	0.0286753	0.0156951	0.307357	0.2211	0.0261	2.42744e-17	0.048463	0.040503	0.23149	cis		Yes	Not assessed
1:161405420:G:C	rs112252354	FCGR2A_3309	COVID_A2	35	0.0692776	0.0286753	0.0156951	0.307357	-0.5573	0.0612	8.53108e-20	-0.095303	0.068864	0.16638	cis		Yes	Not assessed
1:161410911:G:C	rs143029017	FCGR2A_3309	COVID_A2	35	0.0692776	0.0286753	0.0156951	0.307357	-0.5425	0.0506	8.08204e-27	0.040451	0.072381	0.576256	cis		Yes	Not assessed
1:161413769:A:C	rs143135133	FCGR2A_3309	COVID_A2	35	0.0692776	0.0286753	0.0156951	0.307357	0.5057	0.0743	1.00217e-11	0.010496	0.14492	0.942263	cis		Yes	Not assessed
1:161440015:G:A	rs79106728	FCGR2A_3309	COVID_A2	35	0.0692776	0.0286753	0.0156951	0.307357	0.3154	0.0525	1.88268e-09	-0.084565	0.059373	0.154359	cis		Yes	Not assessed
1:161476187:A:C	rs4638103	FCGR2A_3309	COVID_A2	35	0.0692776	0.0286753	0.0156951	0.307357	-0.4066	0.0374	1.57316e-27	-0.046022	0.057879	0.426531	cis		Yes	Not assessed
1:161483076:G:T	rs71639066	FCGR2A_3309	COVID_A2	35	0.0692776	0.0286753	0.0156951	0.307357	0.4469	0.0634	1.80343e-12	0.13166	0.069017	0.056437	cis		Yes	Not assessed
1:161494119:G:A	rs150629305	FCGR2A_3309	COVID_A2	35	0.0692776	0.0286753	0.0156951	0.307357	-0.8036	0.1299	6.15939e-10	-0.35993	0.25491	0.157953	cis		Yes	Not assessed
1:161495597:A:G	rs114587108	FCGR2A_3309	COVID_A2	35	0.0692776	0.0286753	0.0156951	0.307357	0.494	0.0737	2.04394e-11	0.082177	0.092028	0.37188	cis		Yes	Not assessed
1:161498640:C:T	rs114797774	FCGR2A_3309	COVID_A2	35	0.0692776	0.0286753	0.0156951	0.307357	0.7118	0.0882	7.01286e-16	0.027793	0.16214	0.863899	cis		Yes	Not assessed
1:161498819:A:C	rs74124991	FCGR2A_3309	COVID_A2	35	0.0692776	0.0286753	0.0156951	0.307357	0.5223	0.0825	2.43721e-10	0.16378	0.084392	0.052294	cis		Yes	Not assessed
1:161500469:A:G	rs72717025	FCGR2A_3309	COVID_A2	35	0.0692776	0.0286753	0.0156951	0.307357	0.928	0.1181	3.91102e-15	-0.038316	0.21071	0.855706	cis		Yes	Not assessed
1:161505324:C:G	rs72717028	FCGR2A_3309	COVID_A2	35	0.0692776	0.0286753	0.0156951	0.307357	-0.7357	0.1044	1.82902e-12	-0.19846	0.15215	0.192107	cis		Yes	Not assessed
1:161509955:A:G	rs1801274	FCGR2A_3309	COVID_A2	35	0.0692776	0.0286753	0.0156951	0.307357	1.2389	0.0126	0	0.071916	0.036249	0.047262	cis		Yes	Not assessed
1:161511740:G:A	rs113590334	FCGR2A_3309	COVID_A2	35	0.0692776	0.0286753	0.0156951	0.307357	-0.6161	0.0614	1.07828e-23	0.033562	0.092781	0.717551	cis		Yes	Not assessed
1:161511771:C:T	rs10800357	FCGR2A_3309	COVID_A2	35	0.0692776	0.0286753	0.0156951	0.307357	0.3922	0.0255	2.21601e-53	-0.068642	0.039798	0.0845707	cis		Yes	Not assessed
1:161514409:A:C	rs139121685	FCGR2A_3309	COVID_A2	35	0.0692776	0.0286753	0.0156951	0.307357	-0.814	0.0734	1.40416e-28	-0.1175	0.12508	0.347526	cis		Yes	Not assessed
1:161520680:C:G	rs387693	FCGR2A_3309	COVID_A2	35	0.0692776	0.0286753	0.0156951	0.307357	0.342	0.0245	2.76584e-44	0.040615	0.038101	0.286432	cis		Yes	Not assessed
1:161520734:T:C	rs71632953	FCGR2A_3309	COVID_A2	35	0.0692776	0.0286753	0.0156951	0.307357	0.6938	0.0662	1.06335e-25	0.024979	0.083124	0.763794	cis		Yes	Not assessed
1:161523905:G:A	rs41297664	FCGR2A_3309	COVID_A2	35	0.0692776	0.0286753	0.0156951	0.307357	-0.9227	0.1551	2.69678e-09	-0.0562	0.32142	0.861198	cis		Yes	Not assessed
1:161531106:C:A	rs115613642	FCGR2A_3309	COVID_A2	35	0.0692776	0.0286753	0.0156951	0.307357	0.5667	0.0701	6.25913e-16	-0.068395	0.12003	0.568803	cis		Yes	Not assessed
1:161540103:G:A	rs115002999	FCGR2A_3309	COVID_A2	35	0.0692776	0.0286753	0.0156951	0.307357	-0.6921	0.0708	1.43555e-22	-0.085455	0.1254	0.495581	cis		Yes	Not assessed
1:161541184:C:T	rs141651278	FCGR2A_3309	COVID_A2	35	0.0692776	0.0286753	0.0156951	0.307357	-0.6027	0.063	1.10408e-21	0.038561	0.086716	0.65655	cis		Yes	Not assessed
1:161544666:C:T	rs144672514	FCGR2A_3309	COVID_A2	35	0.0692776	0.0286753	0.0156951	0.307357	0.6607	0.1025	1.14952e-10	0.095604	0.21309	0.65368	cis		Yes	Not assessed
1:161546570:G:A	rs71632960	FCGR2A_3309	COVID_A2	35	0.0692776	0.0286753	0.0156951	0.307357	-0.5245	0.0591	7.00664e-19	-0.0029755	0.083921	0.971716	cis		Yes	Not assessed
1:161688990:C:T	rs10917688	FCGR2A_3309	COVID_A2	35	0.0692776	0.0286753	0.0156951	0.307357	0.3437	0.0295	2.27188e-31	0.0096856	0.046413	0.834696	cis		Yes	Not assessed
1:161707994:G:A	rs1954173	FCGR2A_3309	COVID_A2	35	0.0692776	0.0286753	0.0156951	0.307357	0.1707	0.0258	3.68353e-11	0.0031711	0.036784	0.931301	cis		Yes	Not assessed
1:161747095:G:A	rs35801335	FCGR2A_3309	COVID_A2	35	0.0692776	0.0286753	0.0156951	0.307357	-0.4381	0.0621	1.72911e-12	-0.10954	0.080199	0.171985	cis		Yes	Not assessed
1:161768448:A:C	rs4657101	FCGR2A_3309	COVID_A2	35	0.0692776	0.0286753	0.0156951	0.307357	-0.1956	0.0295	3.34532e-11	0.027459	0.032085	0.392097	cis		Yes	Not assessed
1:161931418:C:T	rs61809464	FCGR2A_3309	COVID_A2	35	0.0692776	0.0286753	0.0156951	0.307357	0.3086	0.0471	5.67651e-11	-0.048166	0.08472	0.569674	cis		Yes	Not assessed
1:161986014:C:T	rs2341465	FCGR2A_3309	COVID_A2	35	0.0692776	0.0286753	0.0156951	0.307357	-0.2034	0.0256	1.93702e-15	-0.014047	0.039046	0.71903	cis		Yes	Not assessed
3:98045784:C:T	rs144393567	ST3GAL6_6947_4_3	COVID_A2	11	-0.0765973	0.0321152	0.0170754	0.307357	-0.5873	0.0723	4.54431e-16	-0.022727	0.12689	0.857853	cis		Yes	Not assessed
3:98545436:A:G	rs59241261	ST3GAL6_6947_4_3	COVID_A2	11	-0.0765973	0.0321152	0.0170754	0.307357	-0.2469	0.0452	4.69768e-08	-0.05563	0.055086	0.312555	cis		Yes	Not assessed
3:98583758:G:A	rs3828372	ST3GAL6_6947_4_3	COVID_A2	11	-0.0765973	0.0321152	0.0170754	0.307357	0.2004	0.0258	8.00871e-15	-0.025617	0.037786	0.497804	cis		Yes	Not assessed
3:98773647:C:CAT	rs5851138	ST3GAL6_6947_4_3	COVID_A2	11	-0.0765973	0.0321152	0.0170754	0.307357	-0.7173	0.0443	5.75492e-59	0.075554	0.080772	0.349583	cis		Yes	Not assessed
3:98780118:G:A	rs11914715	ST3GAL6_6947_4_3	COVID_A2	11	-0.0765973	0.0321152	0.0170754	0.307357	0.2019	0.0343	3.94943e-09	-0.043247	0.037714	0.251502	cis		Yes	Not assessed
3:98790861:G:A	rs72934623	ST3GAL6_6947_4_3	COVID_A2	11	-0.0765973	0.0321152	0.0170754	0.307357	-1.8784	0.0447	0	0.13232	0.062784	0.0350705	cis		Yes	Not assessed
3:99165891:C:A	rs115903975	ST3GAL6_6947_4_3	COVID_A2	11	-0.0765973	0.0321152	0.0170754	0.307357	-0.8179	0.1216	1.74209e-11	0.20874	0.14409	0.147428	cis		Yes	Not assessed
3:99319487:C:T	rs9871288	ST3GAL6_6947_4_3	COVID_A2	11	-0.0765973	0.0321152	0.0170754	0.307357	-0.2581	0.0274	4.52344e-21	0.034137	0.040938	0.404354	cis		Yes	Not assessed
3:99338723:T:C	rs4501152	ST3GAL6_6947_4_3	COVID_A2	11	-0.0765973	0.0321152	0.0170754	0.307357	0.1792	0.0311	8.30945e-09	0.01205	0.033364	0.717974	cis		Yes	Not assessed
3:98045784:C:T	rs144393567	ST3GAL6_6947_4_3	COVID_B2	11	-0.0765973	0.0321152	0.0170754	0.307357	-0.5873	0.0723	4.54431e-16	0.085129	0.08154	0.296478	cis		Yes	Not assessed
3:98545436:A:G	rs59241261	ST3GAL6_6947_4_3	COVID_B2	11	-0.0765973	0.0321152	0.0170754	0.307357	-0.2469	0.0452	4.69768e-08	-0.036891	0.042244	0.382508	cis		Yes	Not assessed
3:98583758:G:A	rs3828372	ST3GAL6_6947_4_3	COVID_B2	11	-0.0765973	0.0321152	0.0170754	0.307357	0.2004	0.0258	8.00871e-15	-0.010768	0.025927	0.677908	cis		Yes	Not assessed
3:98773647:C:CAT	rs5851138	ST3GAL6_6947_4_3	COVID_B2	11	-0.0765973	0.0321152	0.0170754	0.307357	-0.7173	0.0443	5.75492e-59	-0.023594	0.04997	0.63681	cis		Yes	Not assessed
3:98780118:G:A	rs11914715	ST3GAL6_6947_4_3	COVID_B2	11	-0.0765973	0.0321152	0.0170754	0.307357	0.2019	0.0343	3.94943e-09	-0.064041	0.028021	0.0222856	cis		Yes	Not assessed
3:98790861:G:A	rs72934623	ST3GAL6_6947_4_3	COVID_B2	11	-0.0765973	0.0321152	0.0170754	0.307357	-1.8784	0.0447	0	0.090976	0.045947	0.0477012	cis		Yes	Not assessed
3:99165891:C:A	rs115903975	ST3GAL6_6947_4_3	COVID_B2	11	-0.0765973	0.0321152	0.0170754	0.307357	-0.8179	0.1216	1.74209e-11	0.10316	0.10302	0.316653	cis		Yes	Not assessed
3:99319487:C:T	rs9871288	ST3GAL6_6947_4_3	COVID_B2	11	-0.0765973	0.0321152	0.0170754	0.307357	-0.2581	0.0274	4.52344e-21	0.0092769	0.028236	0.742497	cis		Yes	Not assessed
3:99338723:T:C	rs4501152	ST3GAL6_6947_4_3	COVID_B2	11	-0.0765973	0.0321152	0.0170754	0.307357	0.1792	0.0311	8.30945e-09	0.034771	0.026242	0.185167	cis		Yes	Not assessed
19:5830291:G:A	rs778809	FUT5_4549_78	COVID_A2	12	-0.0923038	0.0408073	0.0237008	0.355512	-0.58	0.025	4.55321e-119	0.080284	0.02892	0.005502	cis		Yes	Not assessed
19:5838584:C:T	rs8101385	FUT5_4549_78	COVID_A2	12	-0.0923038	0.0408073	0.0237008	0.355512	-0.3948	0.0451	2.0614e-18	0.059438	0.047798	0.213674	cis		Yes	Not assessed
19:5842308:T:A	rs28381972	FUT5_4549_78	COVID_A2	12	-0.0923038	0.0408073	0.0237008	0.355512	0.2639	0.0465	1.38471e-08	-0.032928	0.065923	0.617433	cis		Yes	Not assessed
19:5842576:C:T	rs74663821	FUT5_4549_78	COVID_A2	12	-0.0923038	0.0408073	0.0237008	0.355512	-0.9122	0.0925	6.10552e-23	-0.073015	0.097292	0.45297	cis		Yes	Not assessed
19:5850335:C:T	rs117095068	FUT5_4549_78	COVID_A2	12	-0.0923038	0.0408073	0.0237008	0.355512	0.7217	0.0997	4.52952e-13	0.25276	0.19307	0.190479	cis		Yes	Not assessed
19:5852910:G:A	rs28742583	FUT5_4549_78	COVID_A2	12	-0.0923038	0.0408073	0.0237008	0.355512	-0.4284	0.0759	1.65885e-08	0.27153	0.14143	0.0548718	cis		Yes	Not assessed
19:5853390:G:A	rs34552692	FUT5_4549_78	COVID_A2	12	-0.0923038	0.0408073	0.0237008	0.355512	-0.1804	0.0273	3.89393e-11	-0.048324	0.041028	0.238864	cis		Yes	Not assessed
19:5866062:A:C	rs8101625	FUT5_4549_78	COVID_A2	12	-0.0923038	0.0408073	0.0237008	0.355512	0.4083	0.0243	2.34093e-63	-0.017155	0.036517	0.638511	cis		Yes	Not assessed
19:5898622:C:T	rs4807822	FUT5_4549_78	COVID_A2	12	-0.0923038	0.0408073	0.0237008	0.355512	-0.2642	0.0245	4.11132e-27	0.054865	0.036461	0.132386	cis		Yes	Not assessed
19:5990944:T:C	rs8108685	FUT5_4549_78	COVID_A2	12	-0.0923038	0.0408073	0.0237008	0.355512	-0.403	0.0593	1.07599e-11	0.035131	0.098473	0.721273	cis		Yes	Not assessed
19:5995571:T:C	rs2302222	FUT5_4549_78	COVID_A2	12	-0.0923038	0.0408073	0.0237008	0.355512	0.1811	0.0267	1.17892e-11	0.01647	0.038676	0.67022	cis		Yes	Not assessed
19:6074426:G:A	rs72991066	FUT5_4549_78	COVID_A2	12	-0.0923038	0.0408073	0.0237008	0.355512	0.3253	0.0519	3.66131e-10	0.053938	0.079644	0.498255	cis		Yes	Not assessed
16:69567760:T:G	rs185392254	NQO1_9837_60	COVID_B2	13	-0.0598183	0.0299424	0.0457408	0.406713	-0.9317	0.1694	3.79791e-08	-0.22549	0.25161	0.370152	cis		No	Not a missense variant or in LD with missense variants
16:69567760:T:G	rs185392254	NQO1_9837_60	COVID_C2	13	-0.0598183	0.0299424	0.0457408	0.406713	-0.9317	0.1694	3.79791e-08	0.08024	0.11333	0.478932	cis		No	Not a missense variant or in LD with missense variants
7:129777839:C:T	rs2693726	CPA4_9267	COVID_B2	20	-0.0420701	0.021139	0.0465732	0.406713	0.1395	0.0247	1.62539e-08	0.042704	0.024012	0.0753309	cis		Yes	Not assessed
7:129993000:T:G	rs62489410	CPA4_9267	COVID_B2	20	-0.0420701	0.021139	0.0465732	0.406713	0.155	0.0253	8.98432e-10	0.020389	0.021605	0.345314	cis		Yes	Not assessed
7:130130054:G:C	rs4731661	CPA4_9267	COVID_B2	20	-0.0420701	0.021139	0.0465732	0.406713	-0.204	0.0316	1.07723e-10	0.02035	0.032765	0.534541	cis		Yes	Not assessed
7:130226767:C:A	rs12535520	CPA4_9267	COVID_B2	20	-0.0420701	0.021139	0.0465732	0.406713	-0.2775	0.0299	1.67995e-20	0.027044	0.030178	0.370173	cis		Yes	Not assessed
7:130239555:T:C	rs138433028	CPA4_9267	COVID_B2	20	-0.0420701	0.021139	0.0465732	0.406713	-0.5807	0.0727	1.37568e-15	0.17557	0.082038	0.0323462	cis		Yes	Not assessed
7:130276190:A:G	rs9641869	CPA4_9267	COVID_B2	20	-0.0420701	0.021139	0.0465732	0.406713	0.3514	0.0331	2.50248e-26	-0.044085	0.032253	0.171672	cis		Yes	Not assessed
7:130293109:G:T	rs73146784	CPA4_9267	COVID_B2	20	-0.0420701	0.021139	0.0465732	0.406713	0.7955	0.047	2.917e-64	-0.0057446	0.053032	0.913739	cis		Yes	Not assessed
7:130297594:G:A	rs117793761	CPA4_9267	COVID_B2	20	-0.0420701	0.021139	0.0465732	0.406713	0.493	0.0738	2.38589e-11	0.029065	0.077623	0.708078	cis		Yes	Not assessed
7:130298758:G:T	rs34587586	CPA4_9267	COVID_B2	20	-0.0420701	0.021139	0.0465732	0.406713	-1.1658	0.0154	0	0.05024	0.024868	0.0433557	cis		Yes	Not assessed
7:130298871:C:G	rs10259610	CPA4_9267	COVID_B2	20	-0.0420701	0.021139	0.0465732	0.406713	-0.4336	0.0403	5.35725e-27	0.022267	0.034346	0.516782	cis		Yes	Not assessed
7:130300439:G:A	rs35607039	CPA4_9267	COVID_B2	20	-0.0420701	0.021139	0.0465732	0.406713	0.4731	0.0525	2.0339e-19	-0.087549	0.063309	0.1667	cis		Yes	Not assessed
7:130318897:G:A	rs118021467	CPA4_9267	COVID_B2	20	-0.0420701	0.021139	0.0465732	0.406713	-0.6446	0.0935	5.42002e-12	-0.099257	0.11451	0.386053	cis		Yes	Not assessed
7:130343574:G:A	rs143616887	CPA4_9267	COVID_B2	20	-0.0420701	0.021139	0.0465732	0.406713	-0.7411	0.1348	3.84614e-08	-0.31218	0.19003	0.100426	cis		Yes	Not assessed
7:130355288:A:G	rs73152853	CPA4_9267	COVID_B2	20	-0.0420701	0.021139	0.0465732	0.406713	-0.8318	0.1178	1.65165e-12	-0.14551	0.14989	0.331659	cis		Yes	Not assessed
7:130362747:C:G	rs139185474	CPA4_9267	COVID_B2	20	-0.0420701	0.021139	0.0465732	0.406713	0.4826	0.0733	4.5826e-11	-0.066852	0.087778	0.446297	cis		Yes	Not assessed
7:130376754:C:T	rs2402995	CPA4_9267	COVID_B2	20	-0.0420701	0.021139	0.0465732	0.406713	0.2387	0.0261	5.93031e-20	-0.020265	0.024725	0.412435	cis		Yes	Not assessed
7:130408806:G:GA	rs200356336	CPA4_9267	COVID_B2	20	-0.0420701	0.021139	0.0465732	0.406713	0.4244	0.0681	4.60483e-10	0.058336	0.079824	0.464897	cis		Yes	Not assessed
7:130438473:T:C	rs75147084	CPA4_9267	COVID_B2	20	-0.0420701	0.021139	0.0465732	0.406713	0.3752	0.0487	1.3155e-14	-0.077994	0.046346	0.0924015	cis		Yes	Not assessed
7:130570654:C:T	rs148749307	CPA4_9267	COVID_B2	20	-0.0420701	0.021139	0.0465732	0.406713	-0.4001	0.0329	5.00833e-34	0.04185	0.036861	0.25623	cis		Yes	Not assessed
7:130665441:C:G	rs117327347	CPA4_9267	COVID_B2	20	-0.0420701	0.021139	0.0465732	0.406713	-0.3092	0.0511	1.44056e-09	0.080099	0.059581	0.178828	cis		Yes	Not assessed
16:69515685:C:T	rs74325711	NQO1_9837_60	COVID_B2	13	-0.0598183	0.0299424	0.0457408	0.406713	0.3668	0.0387	2.59113e-21	-0.049249	0.033471	0.141185	cis		Yes	Not assessed
16:69617954:CG:C	rs549460104	NQO1_9837_60	COVID_B2	13	-0.0598183	0.0299424	0.0457408	0.406713	0.2762	0.0407	1.15093e-11	-0.025103	0.046751	0.591301	cis		Yes	Not assessed
16:69682266:T:C	rs146818663	NQO1_9837_60	COVID_B2	13	-0.0598183	0.0299424	0.0457408	0.406713	-0.7696	0.1108	3.76193e-12	0.22696	0.19306	0.239758	cis		Yes	Not assessed
16:69702948:G:A	rs12232410	NQO1_9837_60	COVID_B2	13	-0.0598183	0.0299424	0.0457408	0.406713	-0.7499	0.0283	1.01576e-154	0.033757	0.024526	0.168705	cis		Yes	Not assessed
16:69711598:C:T	rs117363962	NQO1_9837_60	COVID_B2	13	-0.0598183	0.0299424	0.0457408	0.406713	-0.6535	0.1171	2.39552e-08	0.19516	0.16525	0.237603	cis		Yes	Not assessed
16:69761420:A:T	rs56140069	NQO1_9837_60	COVID_B2	13	-0.0598183	0.0299424	0.0457408	0.406713	0.1975	0.0321	7.61998e-10	0.0028399	0.03649	0.937966	cis		Yes	Not assessed
16:69853786:A:T	rs75920310	NQO1_9837_60	COVID_B2	13	-0.0598183	0.0299424	0.0457408	0.406713	-0.4708	0.0634	1.12043e-13	0.066824	0.05464	0.221335	cis		Yes	Not assessed
16:69938583:T:A	rs9302605	NQO1_9837_60	COVID_B2	13	-0.0598183	0.0299424	0.0457408	0.406713	-0.1924	0.0297	9.28759e-11	0.03153	0.033894	0.35224	cis		Yes	Not assessed
16:70232193:T:C	rs145087140	NQO1_9837_60	COVID_B2	13	-0.0598183	0.0299424	0.0457408	0.406713	-0.5812	0.0975	2.5066e-09	-0.18828	0.13364	0.158877	cis		Yes	Not assessed
16:70481697:T:G	rs6416698	NQO1_9837_60	COVID_B2	13	-0.0598183	0.0299424	0.0457408	0.406713	0.1834	0.0252	3.39364e-13	0.037685	0.028309	0.183123	cis		Yes	Not assessed
16:70660097:C:A	rs4985556	NQO1_9837_60	COVID_B2	13	-0.0598183	0.0299424	0.0457408	0.406713	0.2159	0.0376	9.35531e-09	0.016513	0.034556	0.632748	cis		Yes	Not assessed
16:70692673:G:T	rs192139454	NQO1_9837_60	COVID_B2	13	-0.0598183	0.0299424	0.0457408	0.406713	-0.3047	0.044	4.35976e-12	-0.029277	0.048714	0.547842	cis		Yes	Not assessed
19:51477049:T:G	rs115494840	RPN1_6458_6_3	COVID_B2	19	0.0481229	0.0240769	0.0456389	0.406713	-0.2973	0.0451	4.33889e-11	0.031398	0.038221	0.41137	trans	SIGLEC12	Yes	Not assessed
19:51502415:G:A	rs1551556	RPN1_6458_6_3	COVID_B2	19	0.0481229	0.0240769	0.0456389	0.406713	0.2376	0.0252	4.15712e-21	0.0242	0.021346	0.25692	trans	SIGLEC12	Yes	Not assessed
19:51508750:C:G	rs116875108	RPN1_6458_6_3	COVID_B2	19	0.0481229	0.0240769	0.0456389	0.406713	0.4791	0.0846	1.48645e-08	0.045639	0.098266	0.64233	trans	SIGLEC14	Yes	Not assessed
19:51564475:G:A	rs10415115	RPN1_6458_6_3	COVID_B2	19	0.0481229	0.0240769	0.0456389	0.406713	0.2339	0.0246	1.9412e-21	0.011467	0.021272	0.589842	trans	SIGLEC14	Yes	Not assessed
19:51593650:G:A	rs57351606	RPN1_6458_6_3	COVID_B2	19	0.0481229	0.0240769	0.0456389	0.406713	-0.4162	0.044	3.10632e-21	-0.05237	0.037604	0.163719	trans	SIGLEC14	Yes	Not assessed
19:51599350:C:G	rs55712999	RPN1_6458_6_3	COVID_B2	19	0.0481229	0.0240769	0.0456389	0.406713	-0.1829	0.026	1.99811e-12	-0.0057508	0.027025	0.831486	trans	SIGLEC14	Yes	Not assessed
19:51600530:A:G	rs11672546	RPN1_6458_6_3	COVID_B2	19	0.0481229	0.0240769	0.0456389	0.406713	0.3156	0.0482	5.8423e-11	-0.00032545	0.048975	0.994698	trans	SIGLEC14	Yes	Not assessed
19:51611832:T:A	rs74861892	RPN1_6458_6_3	COVID_B2	19	0.0481229	0.0240769	0.0456389	0.406713	-1.1962	0.1613	1.20715e-13	-0.42845	0.23945	0.0735651	trans	SIGLEC14	Yes	Not assessed
19:51612691:C:G	rs73050865	RPN1_6458_6_3	COVID_B2	19	0.0481229	0.0240769	0.0456389	0.406713	-1.0146	0.0691	8.27595e-49	0.016217	0.059107	0.783803	trans	SIGLEC14	Yes	Not assessed
19:51617075:G:A	rs181481353	RPN1_6458_6_3	COVID_B2	19	0.0481229	0.0240769	0.0456389	0.406713	-0.8382	0.1115	5.58383e-14	-0.01008	0.14095	0.942988	trans	SIGLEC14	Yes	Not assessed
19:51619189:C:T	rs138536366	RPN1_6458_6_3	COVID_B2	19	0.0481229	0.0240769	0.0456389	0.406713	0.2603	0.0378	5.7285e-12	-0.019791	0.036474	0.587401	trans	SIGLEC14	Yes	Not assessed
19:51627384:T:A	rs1106476	RPN1_6458_6_3	COVID_B2	19	0.0481229	0.0240769	0.0456389	0.406713	-1.1698	0.0319	2.12977e-294	-0.069527	0.034612	0.0445632	trans	SIGLEC14	Yes	Not assessed
19:51628480:A:G	rs4284742	RPN1_6458_6_3	COVID_B2	19	0.0481229	0.0240769	0.0456389	0.406713	-0.3806	0.0304	5.82279e-36	-0.052812	0.029409	0.07253	trans	SIGLEC14	Yes	Not assessed
19:51648000:G:A	rs2864907	RPN1_6458_6_3	COVID_B2	19	0.0481229	0.0240769	0.0456389	0.406713	-0.2265	0.0305	1.11737e-13	0.10279	0.032749	0.00169686	trans	SIGLEC14	Yes	Not assessed
19:51657400:T:C	rs142507298	RPN1_6458_6_3	COVID_B2	19	0.0481229	0.0240769	0.0456389	0.406713	-1.3063	0.1338	1.62155e-22	-0.030176	0.19463	0.876787	trans	SIGLEC14	Yes	Not assessed
19:51659568:T:A	rs34317588	RPN1_6458_6_3	COVID_B2	19	0.0481229	0.0240769	0.0456389	0.406713	0.2733	0.0287	1.68821e-21	-0.018462	0.024856	0.457628	trans	SIGLEC14	Yes	Not assessed
19:51682821:T:G	rs111358382	RPN1_6458_6_3	COVID_B2	19	0.0481229	0.0240769	0.0456389	0.406713	0.3838	0.0372	5.89136e-25	0.055059	0.032067	0.0859794	trans	SIGLEC14	Yes	Not assessed
19:51712063:G:A	rs7252881	RPN1_6458_6_3	COVID_B2	19	0.0481229	0.0240769	0.0456389	0.406713	0.2225	0.0273	3.63374e-16	0.04228	0.029353	0.149755	trans	SIGLEC14	Yes	Not assessed
19:51894424:G:A	rs148610266	RPN1_6458_6_3	COVID_B2	19	0.0481229	0.0240769	0.0456389	0.406713	-0.4637	0.0661	2.29738e-12	0.086623	0.093353	0.353455	trans	SIGLEC14	Yes	Not assessed
16:69515685:C:T	rs74325711	NQO1_9837_60	COVID_C2	13	-0.0598183	0.0299424	0.0457408	0.406713	0.3668	0.0387	2.59113e-21	-0.018348	0.020592	0.372915	cis		Yes	Not assessed
16:69617954:CG:C	rs549460104	NQO1_9837_60	COVID_C2	13	-0.0598183	0.0299424	0.0457408	0.406713	0.2762	0.0407	1.15093e-11	-0.041486	0.027434	0.13048	cis		Yes	Not assessed
16:69682266:T:C	rs146818663	NQO1_9837_60	COVID_C2	13	-0.0598183	0.0299424	0.0457408	0.406713	-0.7696	0.1108	3.76193e-12	0.10833	0.1209	0.370237	cis		Yes	Not assessed
16:69702948:G:A	rs12232410	NQO1_9837_60	COVID_C2	13	-0.0598183	0.0299424	0.0457408	0.406713	-0.7499	0.0283	1.01576e-154	0.027313	0.015086	0.0702204	cis		Yes	Not assessed
16:69711598:C:T	rs117363962	NQO1_9837_60	COVID_C2	13	-0.0598183	0.0299424	0.0457408	0.406713	-0.6535	0.1171	2.39552e-08	0.22961	0.089376	0.0101982	cis		Yes	Not assessed
16:69761420:A:T	rs56140069	NQO1_9837_60	COVID_C2	13	-0.0598183	0.0299424	0.0457408	0.406713	0.1975	0.0321	7.61998e-10	-0.0083632	0.020074	0.676957	cis		Yes	Not assessed
16:69853786:A:T	rs75920310	NQO1_9837_60	COVID_C2	13	-0.0598183	0.0299424	0.0457408	0.406713	-0.4708	0.0634	1.12043e-13	0.038004	0.03426	0.267309	cis		Yes	Not assessed
16:69938583:T:A	rs9302605	NQO1_9837_60	COVID_C2	13	-0.0598183	0.0299424	0.0457408	0.406713	-0.1924	0.0297	9.28759e-11	0.0091654	0.020824	0.659838	cis		Yes	Not assessed
16:70232193:T:C	rs145087140	NQO1_9837_60	COVID_C2	13	-0.0598183	0.0299424	0.0457408	0.406713	-0.5812	0.0975	2.5066e-09	-0.12074	0.084964	0.155296	cis		Yes	Not assessed
16:70451879:C:T	rs149300580	NQO1_9837_60	COVID_C2	13	-0.0598183	0.0299424	0.0457408	0.406713	-0.4799	0.0854	1.9158e-08	0.077791	0.089624	0.38541	cis		Yes	Not assessed
16:70481697:T:G	rs6416698	NQO1_9837_60	COVID_C2	13	-0.0598183	0.0299424	0.0457408	0.406713	0.1834	0.0252	3.39364e-13	-0.018539	0.016436	0.259341	cis		Yes	Not assessed
16:70660097:C:A	rs4985556	NQO1_9837_60	COVID_C2	13	-0.0598183	0.0299424	0.0457408	0.406713	0.2159	0.0376	9.35531e-09	0.021703	0.021536	0.313572	cis		Yes	Not assessed
16:70692673:G:T	rs192139454	NQO1_9837_60	COVID_C2	13	-0.0598183	0.0299424	0.0457408	0.406713	-0.3047	0.044	4.35976e-12	-0.0028787	0.030816	0.925573	cis		Yes	Not assessed
9:91970422:C:T	rs139581125	ASPN_6451	COVID_C1	10	-0.0756301	0.0314098	0.0160468	0.419509	-0.4297	0.0745	8.03201e-09	-0.07474	0.053685	0.163863	cis		Yes	Not assessed
9:92003744:C:T	rs61246786	ASPN_6451	COVID_C1	10	-0.0756301	0.0314098	0.0160468	0.419509	-0.4325	0.076	1.26453e-08	0.080132	0.031498	0.010958	cis		Yes	Not assessed
9:92032020:T:C	rs7944	ASPN_6451	COVID_C1	10	-0.0756301	0.0314098	0.0160468	0.419509	-0.3732	0.0507	1.8261e-13	-0.0058755	0.033918	0.862473	cis		Yes	Not assessed
9:92284377:G:C	rs78155973	ASPN_6451	COVID_C1	10	-0.0756301	0.0314098	0.0160468	0.419509	0.3288	0.0431	2.37003e-14	-0.042239	0.035805	0.238121	cis		Yes	Not assessed
9:92307309:G:A	rs75149413	ASPN_6451	COVID_C1	10	-0.0756301	0.0314098	0.0160468	0.419509	-0.7905	0.101	5.00712e-15	0.044936	0.075467	0.55155	cis		Yes	Not assessed
9:92367311:G:C	rs112730655	ASPN_6451	COVID_C1	10	-0.0756301	0.0314098	0.0160468	0.419509	0.4238	0.062	8.17287e-12	-0.023811	0.039871	0.550373	cis		Yes	Not assessed
9:92425098:A:T	rs2516568	ASPN_6451	COVID_C1	10	-0.0756301	0.0314098	0.0160468	0.419509	-0.4724	0.025	1.23034e-79	0.022436	0.019479	0.249401	cis		Yes	Not assessed
9:92451647:A:G	rs564507908	ASPN_6451	COVID_C1	10	-0.0756301	0.0314098	0.0160468	0.419509	0.362	0.0563	1.27738e-10	-0.0010426	0.048366	0.982802	cis		Yes	Not assessed
9:92466381:C:T	rs41278695	ASPN_6451	COVID_C1	10	-0.0756301	0.0314098	0.0160468	0.419509	-1.1138	0.1199	1.55149e-20	0.23222	0.099309	0.0193687	cis		Yes	Not assessed
9:93026739:G:C	rs79553706	ASPN_6451	COVID_C1	10	-0.0756301	0.0314098	0.0160468	0.419509	-0.1888	0.0301	3.55467e-10	-0.011021	0.019234	0.566648	cis		Yes	Not assessed
5:96895352:T:G	rs34261036	ERAP2_8960	COVID_A2	24	-0.0467426	0.0221591	0.0349091	0.448831	2.2906	0.1697	1.60815e-41	0.030518	0.21786	0.888596	cis		No	Not a missense variant or in LD with missense variants
11:118262596:T:A	rs74543584	AMICA1_8232	COVID_B1	27	-0.0759653	0.0356239	0.0329719	0.448831	-0.8273	0.1391	2.72236e-09	0.49717	0.41009	0.225381	cis		No	Not a missense variant or in LD with missense variants
11:117929586:A:G	rs11604677	AMICA1_8232	COVID_A2	27	-0.0759653	0.0356239	0.0329719	0.448831	-0.1419	0.0245	6.96208e-09	0.041553	0.038537	0.280917	cis		Yes	Not assessed
11:118013226:C:G	rs11216678	AMICA1_8232	COVID_A2	27	-0.0759653	0.0356239	0.0329719	0.448831	0.317	0.0476	2.74455e-11	-0.089834	0.058792	0.126513	cis		Yes	Not assessed
11:118083366:A:G	rs657118	AMICA1_8232	COVID_A2	27	-0.0759653	0.0356239	0.0329719	0.448831	-0.1411	0.025	1.66144e-08	0.0011614	0.037398	0.975226	cis		Yes	Not assessed
11:118146823:T:C	rs117181393	AMICA1_8232	COVID_A2	27	-0.0759653	0.0356239	0.0329719	0.448831	-0.3765	0.0654	8.56824e-09	0.18139	0.082418	0.0277463	cis		Yes	Not assessed
11:118156691:A:C	rs117493218	AMICA1_8232	COVID_A2	27	-0.0759653	0.0356239	0.0329719	0.448831	-0.418	0.0608	6.19899e-12	0.097607	0.081041	0.228429	cis		Yes	Not assessed
11:118157379:C:T	rs876479	AMICA1_8232	COVID_A2	27	-0.0759653	0.0356239	0.0329719	0.448831	0.2342	0.0256	5.77629e-20	-0.088805	0.038504	0.0210892	cis		Yes	Not assessed
11:118170218:T:C	rs144511511	AMICA1_8232	COVID_A2	27	-0.0759653	0.0356239	0.0329719	0.448831	0.4619	0.0838	3.54914e-08	0.064805	0.15536	0.676585	cis		Yes	Not assessed
11:118183048:G:A	rs12801779	AMICA1_8232	COVID_A2	27	-0.0759653	0.0356239	0.0329719	0.448831	-0.8224	0.0988	8.5125e-17	-0.022035	0.18033	0.902746	cis		Yes	Not assessed
11:118192634:A:G	rs113521822	AMICA1_8232	COVID_A2	27	-0.0759653	0.0356239	0.0329719	0.448831	-0.4866	0.0597	3.61663e-16	0.0043171	0.064469	0.94661	cis		Yes	Not assessed
11:118193315:G:T	rs45555132	AMICA1_8232	COVID_A2	27	-0.0759653	0.0356239	0.0329719	0.448831	-0.6533	0.0978	2.39009e-11	0.14503	0.11941	0.224536	cis		Yes	Not assessed
11:118206239:C:G	rs11600544	AMICA1_8232	COVID_A2	27	-0.0759653	0.0356239	0.0329719	0.448831	0.9964	0.018	0	-0.071285	0.037514	0.0574037	cis		Yes	Not assessed
11:118220543:C:G	rs77280285	AMICA1_8232	COVID_A2	27	-0.0759653	0.0356239	0.0329719	0.448831	0.6648	0.0837	1.97903e-15	-0.20827	0.08456	0.0137786	cis		Yes	Not assessed
11:118244616:C:T	rs75458655	AMICA1_8232	COVID_A2	27	-0.0759653	0.0356239	0.0329719	0.448831	0.4746	0.0821	7.4366e-09	0.18022	0.12196	0.139489	cis		Yes	Not assessed
11:118275068:CT:C	rs146289219	AMICA1_8232	COVID_A2	27	-0.0759653	0.0356239	0.0329719	0.448831	-0.6858	0.0773	7.18905e-19	-0.15179	0.13721	0.268614	cis		Yes	Not assessed
11:118277556:C:T	rs2187557	AMICA1_8232	COVID_A2	27	-0.0759653	0.0356239	0.0329719	0.448831	-0.315	0.0281	3.6434e-29	-0.018305	0.039484	0.64293	cis		Yes	Not assessed
11:118295882:A:G	rs73026643	AMICA1_8232	COVID_A2	27	-0.0759653	0.0356239	0.0329719	0.448831	0.4854	0.0749	9.13338e-11	0.053233	0.086194	0.536842	cis		Yes	Not assessed
11:118316501:A:G	rs73014296	AMICA1_8232	COVID_A2	27	-0.0759653	0.0356239	0.0329719	0.448831	0.381	0.0622	9.0455e-10	0.094964	0.074532	0.202615	cis		Yes	Not assessed
11:118335978:G:C	rs149673438	AMICA1_8232	COVID_A2	27	-0.0759653	0.0356239	0.0329719	0.448831	0.4476	0.071	2.89639e-10	0.060361	0.094022	0.520881	cis		Yes	Not assessed
11:118361311:C:T	rs77806521	AMICA1_8232	COVID_A2	27	-0.0759653	0.0356239	0.0329719	0.448831	-0.6364	0.078	3.37881e-16	-0.13159	0.09325	0.1582	cis		Yes	Not assessed
11:118398959:A:G	rs45529532	AMICA1_8232	COVID_A2	27	-0.0759653	0.0356239	0.0329719	0.448831	-0.5483	0.0973	1.74907e-08	-0.0012421	0.096124	0.98969	cis		Yes	Not assessed
11:118402248:A:G	rs12420093	AMICA1_8232	COVID_A2	27	-0.0759653	0.0356239	0.0329719	0.448831	0.4124	0.0633	7.26858e-11	-0.069958	0.10965	0.523466	cis		Yes	Not assessed
11:118403526:T:G	rs148247831	AMICA1_8232	COVID_A2	27	-0.0759653	0.0356239	0.0329719	0.448831	-0.4759	0.0758	3.42154e-10	0.24079	0.12862	0.0611922	cis		Yes	Not assessed
11:118483791:G:C	rs9332795	AMICA1_8232	COVID_A2	27	-0.0759653	0.0356239	0.0329719	0.448831	0.5636	0.0898	3.47016e-10	-0.040274	0.15537	0.795471	cis		Yes	Not assessed
11:118520660:A:G	rs576950	AMICA1_8232	COVID_A2	27	-0.0759653	0.0356239	0.0329719	0.448831	-0.2563	0.0268	1.13914e-21	0.005347	0.0388	0.890391	cis		Yes	Not assessed
11:118532247:G:T	rs45558732	AMICA1_8232	COVID_A2	27	-0.0759653	0.0356239	0.0329719	0.448831	0.3949	0.0685	8.16755e-09	-0.035186	0.12023	0.769785	cis		Yes	Not assessed
11:118653094:T:C	rs72999483	AMICA1_8232	COVID_A2	27	-0.0759653	0.0356239	0.0329719	0.448831	0.2905	0.0415	2.55963e-12	0.040334	0.060341	0.503856	cis		Yes	Not assessed
11:118865528:C:CG	rs60431460	AMICA1_8232	COVID_A2	27	-0.0759653	0.0356239	0.0329719	0.448831	-0.1558	0.0244	1.71122e-10	-0.035117	0.037084	0.34366	cis		Yes	Not assessed
5:96495489:G:A	rs156015	ERAP2_8960	COVID_A2	24	-0.0467426	0.0221591	0.0349091	0.448831	-0.1791	0.027	3.2819e-11	0.07498	0.039162	0.0555421	cis		Yes	Not assessed
5:96597878:C:T	rs55751508	ERAP2_8960	COVID_A2	24	-0.0467426	0.0221591	0.0349091	0.448831	-0.2559	0.0395	9.26506e-11	0.054115	0.062374	0.385619	cis		Yes	Not assessed
5:96646595:C:T	rs71630744	ERAP2_8960	COVID_A2	24	-0.0467426	0.0221591	0.0349091	0.448831	0.5516	0.0918	1.87e-09	-0.0039064	0.09525	0.967286	cis		Yes	Not assessed
5:96714975:A:AG	rs66946447	ERAP2_8960	COVID_A2	24	-0.0467426	0.0221591	0.0349091	0.448831	-0.2804	0.0244	1.45052e-30	-0.025626	0.036802	0.486228	cis		Yes	Not assessed
5:96745230:C:T	rs57889668	ERAP2_8960	COVID_A2	24	-0.0467426	0.0221591	0.0349091	0.448831	-0.3237	0.0298	1.74081e-27	0.040883	0.04195	0.329776	cis		Yes	Not assessed
5:96832278:T:A	rs1991011	ERAP2_8960	COVID_A2	24	-0.0467426	0.0221591	0.0349091	0.448831	-0.313	0.0343	7.14953e-20	0.01812	0.048909	0.711022	cis		Yes	Not assessed
5:96849299:G:T	rs78824072	ERAP2_8960	COVID_A2	24	-0.0467426	0.0221591	0.0349091	0.448831	0.6573	0.0484	5.22124e-42	-0.07917	0.076517	0.300822	cis		Yes	Not assessed
5:96856243:C:T	rs185972411	ERAP2_8960	COVID_A2	24	-0.0467426	0.0221591	0.0349091	0.448831	0.5891	0.07	3.90508e-17	0.093248	0.13205	0.480091	cis		Yes	Not assessed
5:96880513:T:C	rs2617448	ERAP2_8960	COVID_A2	24	-0.0467426	0.0221591	0.0349091	0.448831	-0.3065	0.0379	6.11165e-16	0.043691	0.043913	0.319763	cis		Yes	Not assessed
5:96882318:G:T	rs80159277	ERAP2_8960	COVID_A2	24	-0.0467426	0.0221591	0.0349091	0.448831	0.6015	0.0972	6.08275e-10	-0.083943	0.17282	0.627162	cis		Yes	Not assessed
5:96898979:A:C	rs17486181	ERAP2_8960	COVID_A2	24	-0.0467426	0.0221591	0.0349091	0.448831	-1.5546	0.0475	6.15804e-235	0.097461	0.055105	0.0769537	cis		Yes	Not assessed
5:96899759:T:C	rs138109195	ERAP2_8960	COVID_A2	24	-0.0467426	0.0221591	0.0349091	0.448831	0.6281	0.104	1.54666e-09	0.15139	0.12946	0.242244	cis		Yes	Not assessed
5:96916885:T:C	rs2910686	ERAP2_8960	COVID_A2	24	-0.0467426	0.0221591	0.0349091	0.448831	1.0523	0.0168	0	-0.033869	0.027699	0.221423	cis		Yes	Not assessed
5:96940955:G:A	rs151084967	ERAP2_8960	COVID_A2	24	-0.0467426	0.0221591	0.0349091	0.448831	0.8009	0.0952	4.00286e-17	-0.15071	0.12135	0.214257	cis		Yes	Not assessed
5:97001683:C:T	rs150725010	ERAP2_8960	COVID_A2	24	-0.0467426	0.0221591	0.0349091	0.448831	-0.637	0.0868	2.15663e-13	0.087752	0.12159	0.470476	cis		Yes	Not assessed
5:97020862:T:C	rs147209075	ERAP2_8960	COVID_A2	24	-0.0467426	0.0221591	0.0349091	0.448831	-0.5163	0.0867	2.60044e-09	-0.18276	0.15146	0.227565	cis		Yes	Not assessed
5:97041062:T:A	rs7706943	ERAP2_8960	COVID_A2	24	-0.0467426	0.0221591	0.0349091	0.448831	0.2343	0.0278	3.5145e-17	0.032651	0.041014	0.425977	cis		Yes	Not assessed
5:97085840:A:G	rs6888479	ERAP2_8960	COVID_A2	24	-0.0467426	0.0221591	0.0349091	0.448831	-0.5364	0.0567	3.0701e-21	0.065642	0.057914	0.25703	cis		Yes	Not assessed
5:97086776:T:C	rs10038030	ERAP2_8960	COVID_A2	24	-0.0467426	0.0221591	0.0349091	0.448831	0.2545	0.0396	1.30346e-10	-0.01067	0.065596	0.870784	cis		Yes	Not assessed
5:97090466:T:A	rs146989326	ERAP2_8960	COVID_A2	24	-0.0467426	0.0221591	0.0349091	0.448831	0.6365	0.1043	1.04364e-09	-0.15818	0.22257	0.477272	cis		Yes	Not assessed
5:97142297:A:G	rs115059230	ERAP2_8960	COVID_A2	24	-0.0467426	0.0221591	0.0349091	0.448831	-0.3523	0.0491	7.22265e-13	0.079013	0.081263	0.330895	cis		Yes	Not assessed
5:97146631:C:T	rs6556949	ERAP2_8960	COVID_A2	24	-0.0467426	0.0221591	0.0349091	0.448831	-0.1877	0.0293	1.49247e-10	0.0063641	0.046058	0.890101	cis		Yes	Not assessed
5:97272672:C:G	rs1845663	ERAP2_8960	COVID_A2	24	-0.0467426	0.0221591	0.0349091	0.448831	-0.1403	0.0254	3.32081e-08	-0.0097145	0.028515	0.733344	cis		Yes	Not assessed
11:117929586:A:G	rs11604677	AMICA1_8232	COVID_B1	27	-0.0759653	0.0356239	0.0329719	0.448831	-0.1419	0.0245	6.96208e-09	0.013209	0.040149	0.742156	cis		Yes	Not assessed
11:118013226:C:G	rs11216678	AMICA1_8232	COVID_B1	27	-0.0759653	0.0356239	0.0329719	0.448831	0.317	0.0476	2.74455e-11	0.023123	0.093627	0.804932	cis		Yes	Not assessed
11:118083366:A:G	rs657118	AMICA1_8232	COVID_B1	27	-0.0759653	0.0356239	0.0329719	0.448831	-0.1411	0.025	1.66144e-08	-0.062733	0.03989	0.1158	cis		Yes	Not assessed
11:118156691:A:C	rs117493218	AMICA1_8232	COVID_B1	27	-0.0759653	0.0356239	0.0329719	0.448831	-0.418	0.0608	6.19899e-12	0.18647	0.10837	0.0853091	cis		Yes	Not assessed
11:118157379:C:T	rs876479	AMICA1_8232	COVID_B1	27	-0.0759653	0.0356239	0.0329719	0.448831	0.2342	0.0256	5.77629e-20	-0.064314	0.047723	0.17777	cis		Yes	Not assessed
11:118170218:T:C	rs144511511	AMICA1_8232	COVID_B1	27	-0.0759653	0.0356239	0.0329719	0.448831	0.4619	0.0838	3.54914e-08	-0.61105	0.25879	0.0182168	cis		Yes	Not assessed
11:118183048:G:A	rs12801779	AMICA1_8232	COVID_B1	27	-0.0759653	0.0356239	0.0329719	0.448831	-0.8224	0.0988	8.5125e-17	0.1348	0.25313	0.594357	cis		Yes	Not assessed
11:118192634:A:G	rs113521822	AMICA1_8232	COVID_B1	27	-0.0759653	0.0356239	0.0329719	0.448831	-0.4866	0.0597	3.61663e-16	-0.018965	0.086234	0.82593	cis		Yes	Not assessed
11:118193315:G:T	rs45555132	AMICA1_8232	COVID_B1	27	-0.0759653	0.0356239	0.0329719	0.448831	-0.6533	0.0978	2.39009e-11	0.35753	0.17185	0.0374818	cis		Yes	Not assessed
11:118206239:C:G	rs11600544	AMICA1_8232	COVID_B1	27	-0.0759653	0.0356239	0.0329719	0.448831	0.9964	0.018	0	-0.075923	0.041119	0.064831	cis		Yes	Not assessed
11:118220543:C:G	rs77280285	AMICA1_8232	COVID_B1	27	-0.0759653	0.0356239	0.0329719	0.448831	0.6648	0.0837	1.97903e-15	0.048592	0.13244	0.713695	cis		Yes	Not assessed
11:118244616:C:T	rs75458655	AMICA1_8232	COVID_B1	27	-0.0759653	0.0356239	0.0329719	0.448831	0.4746	0.0821	7.4366e-09	0.28388	0.18328	0.121409	cis		Yes	Not assessed
11:118264079:A:AGCCC	rs201577748	AMICA1_8232	COVID_B1	27	-0.0759653	0.0356239	0.0329719	0.448831	0.3929	0.0636	6.50533e-10	0.0085338	0.15001	0.954634	cis		Yes	Not assessed
11:118275068:CT:C	rs146289219	AMICA1_8232	COVID_B1	27	-0.0759653	0.0356239	0.0329719	0.448831	-0.6858	0.0773	7.18905e-19	-0.13741	0.16192	0.396088	cis		Yes	Not assessed
11:118277556:C:T	rs2187557	AMICA1_8232	COVID_B1	27	-0.0759653	0.0356239	0.0329719	0.448831	-0.315	0.0281	3.6434e-29	0.020107	0.042762	0.638207	cis		Yes	Not assessed
11:118295882:A:G	rs73026643	AMICA1_8232	COVID_B1	27	-0.0759653	0.0356239	0.0329719	0.448831	0.4854	0.0749	9.13338e-11	-0.086416	0.16887	0.608839	cis		Yes	Not assessed
11:118335978:G:C	rs149673438	AMICA1_8232	COVID_B1	27	-0.0759653	0.0356239	0.0329719	0.448831	0.4476	0.071	2.89639e-10	0.0028658	0.15278	0.985034	cis		Yes	Not assessed
11:118361311:C:T	rs77806521	AMICA1_8232	COVID_B1	27	-0.0759653	0.0356239	0.0329719	0.448831	-0.6364	0.078	3.37881e-16	0.13074	0.14021	0.3511	cis		Yes	Not assessed
11:118398959:A:G	rs45529532	AMICA1_8232	COVID_B1	27	-0.0759653	0.0356239	0.0329719	0.448831	-0.5483	0.0973	1.74907e-08	0.097093	0.16928	0.566263	cis		Yes	Not assessed
11:118402248:A:G	rs12420093	AMICA1_8232	COVID_B1	27	-0.0759653	0.0356239	0.0329719	0.448831	0.4124	0.0633	7.26858e-11	-0.11431	0.12691	0.367739	cis		Yes	Not assessed
11:118403526:T:G	rs148247831	AMICA1_8232	COVID_B1	27	-0.0759653	0.0356239	0.0329719	0.448831	-0.4759	0.0758	3.42154e-10	0.16739	0.14338	0.243026	cis		Yes	Not assessed
11:118483791:G:C	rs9332795	AMICA1_8232	COVID_B1	27	-0.0759653	0.0356239	0.0329719	0.448831	0.5636	0.0898	3.47016e-10	-0.13044	0.18713	0.485768	cis		Yes	Not assessed
11:118532247:G:T	rs45558732	AMICA1_8232	COVID_B1	27	-0.0759653	0.0356239	0.0329719	0.448831	0.3949	0.0685	8.16755e-09	0.13668	0.15474	0.377081	cis		Yes	Not assessed
11:118653094:T:C	rs72999483	AMICA1_8232	COVID_B1	27	-0.0759653	0.0356239	0.0329719	0.448831	0.2905	0.0415	2.55963e-12	0.070296	0.071603	0.326225	cis		Yes	Not assessed
11:118865528:C:CG	rs60431460	AMICA1_8232	COVID_B1	27	-0.0759653	0.0356239	0.0329719	0.448831	-0.1558	0.0244	1.71122e-10	-0.087823	0.055075	0.1108	cis		Yes	Not assessed
11:117929586:A:G	rs11604677	AMICA1_8232	COVID_B2	27	-0.0759653	0.0356239	0.0329719	0.448831	-0.1419	0.0245	6.96208e-09	0.022859	0.02455	0.351791	cis		Yes	Not assessed
11:118013226:C:G	rs11216678	AMICA1_8232	COVID_B2	27	-0.0759653	0.0356239	0.0329719	0.448831	0.317	0.0476	2.74455e-11	-0.11451	0.045648	0.012123	cis		Yes	Not assessed
11:118083366:A:G	rs657118	AMICA1_8232	COVID_B2	27	-0.0759653	0.0356239	0.0329719	0.448831	-0.1411	0.025	1.66144e-08	-0.02548	0.023886	0.286092	cis		Yes	Not assessed
11:118146823:T:C	rs117181393	AMICA1_8232	COVID_B2	27	-0.0759653	0.0356239	0.0329719	0.448831	-0.3765	0.0654	8.56824e-09	0.12286	0.064972	0.0586286	cis		Yes	Not assessed
11:118156691:A:C	rs117493218	AMICA1_8232	COVID_B2	27	-0.0759653	0.0356239	0.0329719	0.448831	-0.418	0.0608	6.19899e-12	0.14054	0.059005	0.0172268	cis		Yes	Not assessed
11:118170218:T:C	rs144511511	AMICA1_8232	COVID_B2	27	-0.0759653	0.0356239	0.0329719	0.448831	0.4619	0.0838	3.54914e-08	-0.072519	0.11735	0.536594	cis		Yes	Not assessed
11:118183048:G:A	rs12801779	AMICA1_8232	COVID_B2	27	-0.0759653	0.0356239	0.0329719	0.448831	-0.8224	0.0988	8.5125e-17	-0.048786	0.12989	0.707218	cis		Yes	Not assessed
11:118192634:A:G	rs113521822	AMICA1_8232	COVID_B2	27	-0.0759653	0.0356239	0.0329719	0.448831	-0.4866	0.0597	3.61663e-16	0.0053421	0.046247	0.908039	cis		Yes	Not assessed
11:118193315:G:T	rs45555132	AMICA1_8232	COVID_B2	27	-0.0759653	0.0356239	0.0329719	0.448831	-0.6533	0.0978	2.39009e-11	0.066348	0.089996	0.460981	cis		Yes	Not assessed
11:118206239:C:G	rs11600544	AMICA1_8232	COVID_B2	27	-0.0759653	0.0356239	0.0329719	0.448831	0.9964	0.018	0	-0.062989	0.024279	0.00947611	cis		Yes	Not assessed
11:118220543:C:G	rs77280285	AMICA1_8232	COVID_B2	27	-0.0759653	0.0356239	0.0329719	0.448831	0.6648	0.0837	1.97903e-15	-0.091335	0.063376	0.149539	cis		Yes	Not assessed
11:118244616:C:T	rs75458655	AMICA1_8232	COVID_B2	27	-0.0759653	0.0356239	0.0329719	0.448831	0.4746	0.0821	7.4366e-09	0.0070427	0.092184	0.939102	cis		Yes	Not assessed
11:118275068:CT:C	rs146289219	AMICA1_8232	COVID_B2	27	-0.0759653	0.0356239	0.0329719	0.448831	-0.6858	0.0773	7.18905e-19	-0.089828	0.094065	0.3396	cis		Yes	Not assessed
11:118277556:C:T	rs2187557	AMICA1_8232	COVID_B2	27	-0.0759653	0.0356239	0.0329719	0.448831	-0.315	0.0281	3.6434e-29	0.018264	0.025419	0.472438	cis		Yes	Not assessed
11:118295882:A:G	rs73026643	AMICA1_8232	COVID_B2	27	-0.0759653	0.0356239	0.0329719	0.448831	0.4854	0.0749	9.13338e-11	0.078813	0.070205	0.261602	cis		Yes	Not assessed
11:118316501:A:G	rs73014296	AMICA1_8232	COVID_B2	27	-0.0759653	0.0356239	0.0329719	0.448831	0.381	0.0622	9.0455e-10	0.078435	0.058202	0.177776	cis		Yes	Not assessed
11:118335978:G:C	rs149673438	AMICA1_8232	COVID_B2	27	-0.0759653	0.0356239	0.0329719	0.448831	0.4476	0.071	2.89639e-10	0.032229	0.075178	0.66814	cis		Yes	Not assessed
11:118361311:C:T	rs77806521	AMICA1_8232	COVID_B2	27	-0.0759653	0.0356239	0.0329719	0.448831	-0.6364	0.078	3.37881e-16	-0.009783	0.072499	0.892659	cis		Yes	Not assessed
11:118398959:A:G	rs45529532	AMICA1_8232	COVID_B2	27	-0.0759653	0.0356239	0.0329719	0.448831	-0.5483	0.0973	1.74907e-08	0.16038	0.077067	0.0374297	cis		Yes	Not assessed
11:118402248:A:G	rs12420093	AMICA1_8232	COVID_B2	27	-0.0759653	0.0356239	0.0329719	0.448831	0.4124	0.0633	7.26858e-11	-0.13704	0.072276	0.0579514	cis		Yes	Not assessed
11:118403526:T:G	rs148247831	AMICA1_8232	COVID_B2	27	-0.0759653	0.0356239	0.0329719	0.448831	-0.4759	0.0758	3.42154e-10	0.18313	0.086776	0.034826	cis		Yes	Not assessed
11:118483791:G:C	rs9332795	AMICA1_8232	COVID_B2	27	-0.0759653	0.0356239	0.0329719	0.448831	0.5636	0.0898	3.47016e-10	0.076735	0.10649	0.471165	cis		Yes	Not assessed
11:118520660:A:G	rs576950	AMICA1_8232	COVID_B2	27	-0.0759653	0.0356239	0.0329719	0.448831	-0.2563	0.0268	1.13914e-21	-0.026368	0.028158	0.349052	cis		Yes	Not assessed
11:118532247:G:T	rs45558732	AMICA1_8232	COVID_B2	27	-0.0759653	0.0356239	0.0329719	0.448831	0.3949	0.0685	8.16755e-09	0.086469	0.082382	0.293897	cis		Yes	Not assessed
11:118653094:T:C	rs72999483	AMICA1_8232	COVID_B2	27	-0.0759653	0.0356239	0.0329719	0.448831	0.2905	0.0415	2.55963e-12	0.0074567	0.041053	0.855868	cis		Yes	Not assessed
11:118865528:C:CG	rs60431460	AMICA1_8232	COVID_B2	27	-0.0759653	0.0356239	0.0329719	0.448831	-0.1558	0.0244	1.71122e-10	-0.027908	0.026939	0.300216	cis		Yes	Not assessed
21:36148814:C:T	rs190194214	CBR3_14091	COVID_A2	12	0.0733284	0.0363129	0.0434513	0.482496	0.8649	0.1576	4.06639e-08	0.1286	0.29905	0.667175	cis		No	Not a missense variant or in LD with missense variants
21:35958434:C:T	rs7281493	CBR3_14091	COVID_A2	12	0.0733284	0.0363129	0.0434513	0.482496	-0.1761	0.026	1.26072e-11	0.0065588	0.037296	0.860406	cis		Yes	Not assessed
21:35997764:T:C	rs74759823	CBR3_14091	COVID_A2	12	0.0733284	0.0363129	0.0434513	0.482496	-0.4728	0.078	1.34826e-09	0.32656	0.145	0.0243136	cis		Yes	Not assessed
21:36062627:T:A	rs7282320	CBR3_14091	COVID_A2	12	0.0733284	0.0363129	0.0434513	0.482496	-0.2193	0.0248	9.33978e-19	0.0089732	0.037169	0.809233	cis		Yes	Not assessed
21:36075960:C:T	rs62229261	CBR3_14091	COVID_A2	12	0.0733284	0.0363129	0.0434513	0.482496	-0.5653	0.0833	1.15034e-11	-0.26054	0.17099	0.12758	cis		Yes	Not assessed
21:36103800:C:A	rs116906746	CBR3_14091	COVID_A2	12	0.0733284	0.0363129	0.0434513	0.482496	-0.4509	0.0705	1.59767e-10	-0.11063	0.12653	0.381934	cis		Yes	Not assessed
21:36120671:C:T	rs2242800	CBR3_14091	COVID_A2	12	0.0733284	0.0363129	0.0434513	0.482496	-0.5483	0.0825	3.01041e-11	-0.063926	0.088741	0.4713	cis		Yes	Not assessed
21:36159924:G:A	rs1028997	CBR3_14091	COVID_A2	12	0.0733284	0.0363129	0.0434513	0.482496	-0.764	0.0222	1.53491e-259	-0.052849	0.028192	0.0608464	cis		Yes	Not assessed
21:36183667:G:T	rs74743371	CBR3_14091	COVID_A2	12	0.0733284	0.0363129	0.0434513	0.482496	-0.4594	0.069	2.77634e-11	0.017004	0.095335	0.85844	cis		Yes	Not assessed
21:36219648:A:G	rs114993502	CBR3_14091	COVID_A2	12	0.0733284	0.0363129	0.0434513	0.482496	-0.4569	0.0689	3.32631e-11	-0.28885	0.13787	0.036163	cis		Yes	Not assessed
21:36225383:C:T	rs2284631	CBR3_14091	COVID_A2	12	0.0733284	0.0363129	0.0434513	0.482496	0.295	0.0331	4.99456e-19	0.082318	0.048672	0.0907833	cis		Yes	Not assessed
21:36249077:C:T	rs7510057	CBR3_14091	COVID_A2	12	0.0733284	0.0363129	0.0434513	0.482496	0.1607	0.0277	6.57462e-09	-0.011309	0.040533	0.780239	cis		Yes	Not assessed
19:10147583:C:A	rs139742916	ICAM5_8245_27	COVID_A2	11	-0.0800202	0.0403351	0.0472685	0.482496	-0.7839	0.0828	2.8692e-21	0.11886	0.095563	0.213578	cis		Yes	Not assessed
19:10275740:C:T	rs112872667	ICAM5_8245_27	COVID_A2	11	-0.0800202	0.0403351	0.0472685	0.482496	0.2899	0.053	4.50515e-08	-0.06768	0.076132	0.374013	cis		Yes	Not assessed
19:10284116:G:A	rs1799969	ICAM5_8245_27	COVID_A2	11	-0.0800202	0.0403351	0.0472685	0.482496	0.3423	0.039	1.68008e-18	-0.044617	0.046821	0.340627	cis		Yes	Not assessed
19:10289434:G:C	rs281439	ICAM5_8245_27	COVID_A2	11	-0.0800202	0.0403351	0.0472685	0.482496	0.8918	0.0258	8.22661e-262	0.018154	0.043887	0.679128	cis		Yes	Not assessed
19:10292927:C:T	rs74827019	ICAM5_8245_27	COVID_A2	11	-0.0800202	0.0403351	0.0472685	0.482496	0.3443	0.0435	2.47367e-15	-0.11648	0.071083	0.101287	cis		Yes	Not assessed
19:10298650:C:T	rs78415953	ICAM5_8245_27	COVID_A2	11	-0.0800202	0.0403351	0.0472685	0.482496	0.5777	0.0562	8.73059e-25	0.10075	0.064669	0.119249	cis		Yes	Not assessed
19:10334150:G:A	rs2278442	ICAM5_8245_27	COVID_A2	11	-0.0800202	0.0403351	0.0472685	0.482496	0.3335	0.025	1.3546e-40	-0.061643	0.038678	0.110992	cis		Yes	Not assessed
19:10420548:G:C	rs753859	ICAM5_8245_27	COVID_A2	11	-0.0800202	0.0403351	0.0472685	0.482496	-0.2668	0.0243	4.79975e-28	0.060948	0.037157	0.100946	cis		Yes	Not assessed
19:10577400:A:G	rs118167193	ICAM5_8245_27	COVID_A2	11	-0.0800202	0.0403351	0.0472685	0.482496	-0.5924	0.0614	5.0022e-22	0.13271	0.076346	0.0821632	cis		Yes	Not assessed
6:6675655:C:T	rs77102967	ICAM5_8245_27	COVID_A2	11	-0.0800202	0.0403351	0.0472685	0.482496	-1.0155	0.1791	1.42784e-08	0.4681	0.33317	0.160025	trans	AL031123.2	Yes	Not assessed
9:133274295:A:T	rs115478735	ICAM5_8245_27	COVID_A2	11	-0.0800202	0.0403351	0.0472685	0.482496	-0.4098	0.0315	1.08013e-38	0.1862	0.046057	5.28129e-05	trans	ABO	Yes	Not assessed
17:27817713:C:T	rs1014025	VTN_13125_45_3	COVID_A2	28	-0.0507323	0.0257986	0.0492435	0.482496	0.2003	0.0251	1.46239e-15	0.037613	0.037061	0.310156	cis		Yes	Not assessed
17:27931243:G:A	rs35233508	VTN_13125_45_3	COVID_A2	28	-0.0507323	0.0257986	0.0492435	0.482496	0.5302	0.0674	3.64792e-15	-0.074464	0.082729	0.368069	cis		Yes	Not assessed
17:27962469:C:T	rs113218396	VTN_13125_45_3	COVID_A2	28	-0.0507323	0.0257986	0.0492435	0.482496	0.4687	0.0536	2.24198e-18	0.056657	0.081952	0.48935	cis		Yes	Not assessed
17:28018206:G:C	rs62065048	VTN_13125_45_3	COVID_A2	28	-0.0507323	0.0257986	0.0492435	0.482496	-0.4919	0.069	1.01111e-12	0.066206	0.10978	0.546456	cis		Yes	Not assessed
17:28133950:C:A	rs17719191	VTN_13125_45_3	COVID_A2	28	-0.0507323	0.0257986	0.0492435	0.482496	0.5308	0.0548	3.45363e-22	-0.18047	0.083174	0.0300229	cis		Yes	Not assessed
17:28141946:C:T	rs75539018	VTN_13125_45_3	COVID_A2	28	-0.0507323	0.0257986	0.0492435	0.482496	0.5108	0.0519	7.42176e-23	-0.018582	0.064354	0.772775	cis		Yes	Not assessed
17:28214455:A:G	rs148067778	VTN_13125_45_3	COVID_A2	28	-0.0507323	0.0257986	0.0492435	0.482496	-0.4327	0.0526	1.93189e-16	-0.09949	0.089554	0.26659	cis		Yes	Not assessed
17:28232714:G:A	rs57710047	VTN_13125_45_3	COVID_A2	28	-0.0507323	0.0257986	0.0492435	0.482496	-0.2431	0.0337	5.44717e-13	-0.072276	0.04893	0.139641	cis		Yes	Not assessed
17:28239284:G:A	rs139068560	VTN_13125_45_3	COVID_A2	28	-0.0507323	0.0257986	0.0492435	0.482496	-0.5257	0.0815	1.11624e-10	0.025686	0.10485	0.806473	cis		Yes	Not assessed
17:28267792:G:A	rs147777841	VTN_13125_45_3	COVID_A2	28	-0.0507323	0.0257986	0.0492435	0.482496	0.6456	0.0975	3.55479e-11	0.060938	0.16253	0.70771	cis		Yes	Not assessed
17:28278851:T:C	rs117965786	VTN_13125_45_3	COVID_A2	28	-0.0507323	0.0257986	0.0492435	0.482496	0.6751	0.1172	8.3995e-09	-0.10907	0.16856	0.517587	cis		Yes	Not assessed
17:28281654:A:G	rs138244195	VTN_13125_45_3	COVID_A2	28	-0.0507323	0.0257986	0.0492435	0.482496	0.5007	0.084	2.51138e-09	-0.075942	0.12272	0.536033	cis		Yes	Not assessed
17:28284977:C:T	rs117794493	VTN_13125_45_3	COVID_A2	28	-0.0507323	0.0257986	0.0492435	0.482496	-0.4311	0.0777	2.88522e-08	0.10203	0.1168	0.382366	cis		Yes	Not assessed
17:28307288:G:T	rs112296497	VTN_13125_45_3	COVID_A2	28	-0.0507323	0.0257986	0.0492435	0.482496	-0.6968	0.067	2.47933e-25	0.099721	0.10581	0.345961	cis		Yes	Not assessed
17:28310241:C:T	rs71372371	VTN_13125_45_3	COVID_A2	28	-0.0507323	0.0257986	0.0492435	0.482496	-0.5148	0.0533	4.52278e-22	0.12535	0.06277	0.0458281	cis		Yes	Not assessed
17:28319433:C:A	rs72846720	VTN_13125_45_3	COVID_A2	28	-0.0507323	0.0257986	0.0492435	0.482496	-0.5177	0.0627	1.49657e-16	-0.087589	0.11629	0.451333	cis		Yes	Not assessed
17:28331653:C:T	rs117121804	VTN_13125_45_3	COVID_A2	28	-0.0507323	0.0257986	0.0492435	0.482496	0.6284	0.1073	4.72789e-09	0.24458	0.16816	0.145822	cis		Yes	Not assessed
17:28334133:G:A	rs3093718	VTN_13125_45_3	COVID_A2	28	-0.0507323	0.0257986	0.0492435	0.482496	0.4766	0.0605	3.335e-15	0.080877	0.1121	0.470619	cis		Yes	Not assessed
17:28336185:C:G	rs146180490	VTN_13125_45_3	COVID_A2	28	-0.0507323	0.0257986	0.0492435	0.482496	0.7188	0.0995	5.04355e-13	0.33035	0.15192	0.0296676	cis		Yes	Not assessed
17:28347105:TAGCCAGGTCGTA:T	rs140055200	VTN_13125_45_3	COVID_A2	28	-0.0507323	0.0257986	0.0492435	0.482496	-0.531	0.0539	6.74768e-23	-0.0045929	0.068029	0.946173	cis		Yes	Not assessed
17:28367015:T:A	rs2227742	VTN_13125_45_3	COVID_A2	28	-0.0507323	0.0257986	0.0492435	0.482496	-0.5891	0.091	9.56783e-11	-0.059512	0.13977	0.670264	cis		Yes	Not assessed
17:28367840:G:A	rs704	VTN_13125_45_3	COVID_A2	28	-0.0507323	0.0257986	0.0492435	0.482496	1.0198	0.0172	0	-0.040582	0.027261	0.13658	cis		Yes	Not assessed
17:28374084:T:G	rs571052714	VTN_13125_45_3	COVID_A2	28	-0.0507323	0.0257986	0.0492435	0.482496	0.679	0.0776	2.13353e-18	-0.083687	0.14935	0.575247	cis		Yes	Not assessed
17:28395340:G:C	rs117397871	VTN_13125_45_3	COVID_A2	28	-0.0507323	0.0257986	0.0492435	0.482496	0.545	0.0978	2.50969e-08	0.095596	0.15978	0.549641	cis		Yes	Not assessed
17:28407251:G:A	rs41297051	VTN_13125_45_3	COVID_A2	28	-0.0507323	0.0257986	0.0492435	0.482496	0.7617	0.1304	5.18082e-09	-0.26131	0.16468	0.112564	cis		Yes	Not assessed
17:28456565:C:T	rs4794831	VTN_13125_45_3	COVID_A2	28	-0.0507323	0.0257986	0.0492435	0.482496	0.5443	0.0974	2.29309e-08	0.063044	0.12902	0.625098	cis		Yes	Not assessed
17:28473186:A:G	rs3764866	VTN_13125_45_3	COVID_A2	28	-0.0507323	0.0257986	0.0492435	0.482496	-0.2527	0.0248	2.20861e-24	0.034402	0.036313	0.343448	cis		Yes	Not assessed
17:29386227:T:A	rs7218758	VTN_13125_45_3	COVID_A2	28	-0.0507323	0.0257986	0.0492435	0.482496	0.172	0.0301	1.10166e-08	-0.021303	0.042401	0.615374	trans	NUFIP2	Yes	Not assessed
19:10147583:C:A	rs139742916	ICAM5_8245_27	COVID_B2	11	-0.0800202	0.0403351	0.0472685	0.482496	-0.7839	0.0828	2.8692e-21	0.13865	0.074367	0.0622652	cis		Yes	Not assessed
19:10275740:C:T	rs112872667	ICAM5_8245_27	COVID_B2	11	-0.0800202	0.0403351	0.0472685	0.482496	0.2899	0.053	4.50515e-08	-0.036231	0.053171	0.495615	cis		Yes	Not assessed
19:10289434:G:C	rs281439	ICAM5_8245_27	COVID_B2	11	-0.0800202	0.0403351	0.0472685	0.482496	0.8918	0.0258	8.22661e-262	-0.012934	0.028031	0.644499	cis		Yes	Not assessed
19:10292927:C:T	rs74827019	ICAM5_8245_27	COVID_B2	11	-0.0800202	0.0403351	0.0472685	0.482496	0.3443	0.0435	2.47367e-15	-0.088709	0.047689	0.0628634	cis		Yes	Not assessed
19:10298650:C:T	rs78415953	ICAM5_8245_27	COVID_B2	11	-0.0800202	0.0403351	0.0472685	0.482496	0.5777	0.0562	8.73059e-25	0.040836	0.049771	0.411944	cis		Yes	Not assessed
19:10334150:G:A	rs2278442	ICAM5_8245_27	COVID_B2	11	-0.0800202	0.0403351	0.0472685	0.482496	0.3335	0.025	1.3546e-40	-0.068116	0.025228	0.00693362	cis		Yes	Not assessed
19:10420548:G:C	rs753859	ICAM5_8245_27	COVID_B2	11	-0.0800202	0.0403351	0.0472685	0.482496	-0.2668	0.0243	4.79975e-28	0.021938	0.02714	0.418902	cis		Yes	Not assessed
19:10577400:A:G	rs118167193	ICAM5_8245_27	COVID_B2	11	-0.0800202	0.0403351	0.0472685	0.482496	-0.5924	0.0614	5.0022e-22	0.19911	0.057932	0.000588281	cis		Yes	Not assessed
6:6675655:C:T	rs77102967	ICAM5_8245_27	COVID_B2	11	-0.0800202	0.0403351	0.0472685	0.482496	-1.0155	0.1791	1.42784e-08	0.34899	0.21387	0.102725	trans	AL031123.2	Yes	Not assessed
9:133274295:A:T	rs115478735	ICAM5_8245_27	COVID_B2	11	-0.0800202	0.0403351	0.0472685	0.482496	-0.4098	0.0315	1.08013e-38	0.13345	0.032563	4.16358e-05	trans	ABO	Yes	Not assessed
4:987896:C:G	rs148775298	IDUA_3169_70	COVID_D1	16	-0.0681761	0.0344913	0.0480848	0.483695	-1.2357	0.1469	4.03612e-17	0.13976	0.22225	0.529453	cis		No	missense_variant
16:48794762:C:T	rs141202826	CBLN1_9313	COVID_D1	15	-0.0721194	0.0353744	0.0414756	0.483695	-1.1366	0.1618	2.14493e-12	0.49324	0.27475	0.0726167	cis		No	Not a missense variant or in LD with missense variants
14:65475751:C:G	rs146246676	FUT8_8244_16	COVID_D1	16	0.0735113	0.0300035	0.0142821	0.483695	0.8871	0.1267	2.53094e-12	0.23028	0.17525	0.188843	cis		No	Not a missense variant or in LD with missense variants
4:987956:G:A	rs200911718	IDUA_3169_70	COVID_D1	16	-0.0681761	0.0344913	0.0480848	0.483695	0.9707	0.155	3.78658e-10	-0.61871	0.27409	0.0239878	cis		No	Not a missense variant or in LD with missense variants
3:190576048:T:C	rs141211213	IL1RAP_14048_7	COVID_D1	16	0.0657733	0.028171	0.0195546	0.483695	1.1013	0.1752	3.25836e-10	0.16563	0.36665	0.651457	cis		No	Not a missense variant or in LD with missense variants
3:190576048:T:C	rs141211213	IL1RAP_2630_12	COVID_D1	17	0.0638961	0.0274444	0.0199013	0.483695	1.1873	0.175	1.16432e-11	0.16563	0.36665	0.651457	cis		No	Not a missense variant or in LD with missense variants
1:19970294:C:T	rs76854748	PLA2G2A_2692_74_2	COVID_D1	13	-0.0603566	0.030258	0.046072	0.483695	0.9922	0.1374	5.15112e-13	0.10715	0.17749	0.546046	cis		No	Not a missense variant or in LD with missense variants
7:83215887:A:G	rs139692550	SEMA3E_5363_51_3	COVID_D1	19	-0.0688659	0.0282923	0.0149295	0.483695	-0.8126	0.1485	4.4485e-08	-0.27523	0.29547	0.351596	cis		No	Not a missense variant or in LD with missense variants
7:83345809:G:A	rs117307258	SEMA3E_5363_51_3	COVID_D1	19	-0.0688659	0.0282923	0.0149295	0.483695	-1.1095	0.1431	8.95211e-15	0.2981	0.15078	0.0480357	cis		No	Not a missense variant or in LD with missense variants
16:48599248:A:G	rs77479887	CBLN1_9313	COVID_D1	15	-0.0721194	0.0353744	0.0414756	0.483695	-0.7911	0.104	2.81116e-14	-0.33844	0.16233	0.0370794	cis		Yes	Not assessed
16:48872126:C:T	rs118051363	CBLN1_9313	COVID_D1	15	-0.0721194	0.0353744	0.0414756	0.483695	-0.8067	0.1305	6.34514e-10	0.109	0.17621	0.536193	cis		Yes	Not assessed
16:48872176:C:T	rs112130821	CBLN1_9313	COVID_D1	15	-0.0721194	0.0353744	0.0414756	0.483695	-0.9688	0.1406	5.56086e-12	-0.034245	0.17799	0.84743	cis		Yes	Not assessed
16:48890317:A:G	rs116946931	CBLN1_9313	COVID_D1	15	-0.0721194	0.0353744	0.0414756	0.483695	-0.8865	0.1294	7.34124e-12	0.31913	0.14716	0.0301137	cis		Yes	Not assessed
16:48909130:A:G	rs73551389	CBLN1_9313	COVID_D1	15	-0.0721194	0.0353744	0.0414756	0.483695	0.2562	0.0453	1.55276e-08	0.021535	0.050197	0.667916	cis		Yes	Not assessed
16:48929129:T:G	rs2160488	CBLN1_9313	COVID_D1	15	-0.0721194	0.0353744	0.0414756	0.483695	-0.1734	0.0251	4.90266e-12	0.059517	0.026779	0.0262478	cis		Yes	Not assessed
16:48967998:C:T	rs62031961	CBLN1_9313	COVID_D1	15	-0.0721194	0.0353744	0.0414756	0.483695	-0.7699	0.1057	3.24493e-13	0.095223	0.13361	0.476035	cis		Yes	Not assessed
16:48972547:T:A	rs10852587	CBLN1_9313	COVID_D1	15	-0.0721194	0.0353744	0.0414756	0.483695	-1.0805	0.0327	1.97302e-239	0.069927	0.041266	0.0901622	cis		Yes	Not assessed
16:48980288:A:AC	rs5816611	CBLN1_9313	COVID_D1	15	-0.0721194	0.0353744	0.0414756	0.483695	-0.2404	0.0279	6.90394e-18	0.015679	0.0549	0.775191	cis		Yes	Not assessed
16:49019402:T:C	rs117162243	CBLN1_9313	COVID_D1	15	-0.0721194	0.0353744	0.0414756	0.483695	0.6858	0.1125	1.08755e-09	-0.12708	0.14508	0.381068	cis		Yes	Not assessed
16:49054591:A:G	rs143653516	CBLN1_9313	COVID_D1	15	-0.0721194	0.0353744	0.0414756	0.483695	-0.7	0.1073	6.8564e-11	0.10321	0.15173	0.496364	cis		Yes	Not assessed
16:49084473:T:C	rs185056273	CBLN1_9313	COVID_D1	15	-0.0721194	0.0353744	0.0414756	0.483695	0.583	0.0996	4.81584e-09	-0.089027	0.10851	0.41196	cis		Yes	Not assessed
16:49290828:T:G	rs41214	CBLN1_9313	COVID_D1	15	-0.0721194	0.0353744	0.0414756	0.483695	-0.1707	0.0283	1.62141e-09	0.026192	0.029324	0.371754	cis		Yes	Not assessed
16:49335051:T:C	rs12597189	CBLN1_9313	COVID_D1	15	-0.0721194	0.0353744	0.0414756	0.483695	-0.2717	0.0485	2.11817e-08	-0.022355	0.057697	0.698419	cis		Yes	Not assessed
19:58350442:A:G	rs145144275	CRISP2_9282	COVID_D1	13	-0.0785278	0.0347557	0.023857	0.483695	-0.8004	0.1463	4.47629e-08	0.10166	0.16585	0.5399	trans	A1BG	Yes	Not assessed
6:48264595:G:A	rs4711906	CRISP2_9282	COVID_D1	13	-0.0785278	0.0347557	0.023857	0.483695	-0.2405	0.0409	4.09782e-09	0.034949	0.046538	0.452666	trans	PTCHD4	Yes	Not assessed
6:48975153:C:T	rs182853775	CRISP2_9282	COVID_D1	13	-0.0785278	0.0347557	0.023857	0.483695	-1.075	0.1739	6.34095e-10	-0.10707	0.19846	0.589539	cis		Yes	Not assessed
6:49168212:G:T	rs2516122	CRISP2_9282	COVID_D1	13	-0.0785278	0.0347557	0.023857	0.483695	0.1522	0.0246	6.13231e-10	-0.039483	0.026314	0.133496	cis		Yes	Not assessed
6:49211009:T:C	rs72868426	CRISP2_9282	COVID_D1	13	-0.0785278	0.0347557	0.023857	0.483695	0.5496	0.065	2.78169e-17	-0.086212	0.084502	0.307616	cis		Yes	Not assessed
6:49381835:C:T	rs146098784	CRISP2_9282	COVID_D1	13	-0.0785278	0.0347557	0.023857	0.483695	0.5145	0.091	1.56897e-08	-0.026982	0.11284	0.811015	cis		Yes	Not assessed
6:49526528:A:G	rs9367359	CRISP2_9282	COVID_D1	13	-0.0785278	0.0347557	0.023857	0.483695	-0.2046	0.0261	4.53858e-15	-0.0057643	0.027482	0.833864	cis		Yes	Not assessed
6:49560281:C:T	rs144043795	CRISP2_9282	COVID_D1	13	-0.0785278	0.0347557	0.023857	0.483695	0.4274	0.0531	8.34977e-16	-0.035058	0.061304	0.567409	cis		Yes	Not assessed
6:49607545:C:T	rs2306440	CRISP2_9282	COVID_D1	13	-0.0785278	0.0347557	0.023857	0.483695	-0.3931	0.0268	1.03483e-48	0.055136	0.029655	0.062992	cis		Yes	Not assessed
6:49607742:G:T	rs76003618	CRISP2_9282	COVID_D1	13	-0.0785278	0.0347557	0.023857	0.483695	0.4586	0.0724	2.38492e-10	0.012158	0.076635	0.873946	cis		Yes	Not assessed
6:49695854:A:G	rs36069724	CRISP2_9282	COVID_D1	13	-0.0785278	0.0347557	0.023857	0.483695	-1.642	0.0854	2.19288e-82	-0.024188	0.10709	0.821306	cis		Yes	Not assessed
6:49753164:A:G	rs478328	CRISP2_9282	COVID_D1	13	-0.0785278	0.0347557	0.023857	0.483695	0.5695	0.0227	6.70622e-139	-0.067038	0.026639	0.0118515	cis		Yes	Not assessed
6:49827064:C:T	rs17663869	CRISP2_9282	COVID_D1	13	-0.0785278	0.0347557	0.023857	0.483695	-0.9746	0.1039	6.58644e-21	-0.021111	0.15421	0.891112	cis		Yes	Not assessed
14:65188971:A:G	rs142182836	FUT8_8244_16	COVID_D1	16	0.0735113	0.0300035	0.0142821	0.483695	0.644	0.0752	1.09179e-17	-0.065741	0.10006	0.511171	cis		Yes	Not assessed
14:65227455:C:A	rs184503772	FUT8_8244_16	COVID_D1	16	0.0735113	0.0300035	0.0142821	0.483695	1.0798	0.1903	1.39339e-08	-0.14736	0.21284	0.488717	cis		Yes	Not assessed
14:65269909:G:A	rs149614482	FUT8_8244_16	COVID_D1	16	0.0735113	0.0300035	0.0142821	0.483695	0.8225	0.1349	1.08004e-09	-0.01906	0.18527	0.918061	cis		Yes	Not assessed
14:65297290:G:T	rs145597894	FUT8_8244_16	COVID_D1	16	0.0735113	0.0300035	0.0142821	0.483695	0.9608	0.1714	2.07534e-08	0.085701	0.17382	0.621981	cis		Yes	Not assessed
14:65304392:G:A	rs1256543	FUT8_8244_16	COVID_D1	16	0.0735113	0.0300035	0.0142821	0.483695	0.4283	0.0345	2.18065e-35	0.067113	0.039651	0.090533	cis		Yes	Not assessed
14:65328414:G:A	rs111322046	FUT8_8244_16	COVID_D1	16	0.0735113	0.0300035	0.0142821	0.483695	0.904	0.1398	1.00378e-10	0.10773	0.16573	0.515671	cis		Yes	Not assessed
14:65330128:G:C	rs2127870	FUT8_8244_16	COVID_D1	16	0.0735113	0.0300035	0.0142821	0.483695	-1.049	0.0246	0	-0.051843	0.032617	0.111959	cis		Yes	Not assessed
14:65332630:A:T	rs9635250	FUT8_8244_16	COVID_D1	16	0.0735113	0.0300035	0.0142821	0.483695	-0.3782	0.0413	5.31701e-20	-0.11538	0.044656	0.00977322	cis		Yes	Not assessed
14:65389675:G:A	rs72714420	FUT8_8244_16	COVID_D1	16	0.0735113	0.0300035	0.0142821	0.483695	-0.3334	0.0438	2.70154e-14	-0.03188	0.048241	0.508709	cis		Yes	Not assessed
14:65401751:T:A	rs34232599	FUT8_8244_16	COVID_D1	16	0.0735113	0.0300035	0.0142821	0.483695	-0.2636	0.0342	1.28203e-14	0.0063146	0.041938	0.880315	cis		Yes	Not assessed
14:65406519:C:T	rs141774277	FUT8_8244_16	COVID_D1	16	0.0735113	0.0300035	0.0142821	0.483695	1.1443	0.1138	8.70026e-24	-0.0693	0.16824	0.680404	cis		Yes	Not assessed
14:65684165:A:G	rs146518092	FUT8_8244_16	COVID_D1	16	0.0735113	0.0300035	0.0142821	0.483695	1.0195	0.1018	1.31314e-23	0.091847	0.11098	0.407897	cis		Yes	Not assessed
14:65707444:T:C	rs139065544	FUT8_8244_16	COVID_D1	16	0.0735113	0.0300035	0.0142821	0.483695	0.9464	0.1307	4.45356e-13	0.12585	0.16265	0.43908	cis		Yes	Not assessed
14:65824248:A:G	rs12589188	FUT8_8244_16	COVID_D1	16	0.0735113	0.0300035	0.0142821	0.483695	-0.168	0.0274	8.71163e-10	-0.058973	0.02968	0.0469267	cis		Yes	Not assessed
8:105569300:A:T	rs6993770	FUT8_8244_16	COVID_D1	16	0.0735113	0.0300035	0.0142821	0.483695	-0.1756	0.0274	1.46709e-10	-0.071758	0.030004	0.0167745	trans	AC103853.1	Yes	Not assessed
10:63573888:C:G	rs6479908	IDUA_3169_70	COVID_D1	16	-0.0681761	0.0344913	0.0480848	0.483695	-0.1391	0.0251	2.99322e-08	-0.029237	0.026144	0.263436	trans	REEP3	Yes	Not assessed
12:101827005:C:G	rs7964859	IDUA_3169_70	COVID_D1	16	-0.0681761	0.0344913	0.0480848	0.483695	-0.2399	0.027	6.38144e-19	0.017243	0.029758	0.562292	trans	CHPT1	Yes	Not assessed
4:1002470:C:T	rs201682298	IDUA_3169_70	COVID_D1	16	-0.0681761	0.0344913	0.0480848	0.483695	1.0232	0.0835	1.60122e-34	-0.37856	0.13887	0.00641065	cis		Yes	Not assessed
4:1012984:A:G	rs13143527	IDUA_3169_70	COVID_D1	16	-0.0681761	0.0344913	0.0480848	0.483695	-0.2601	0.0258	6.67711e-24	0.00051755	0.028484	0.985503	cis		Yes	Not assessed
4:1016990:T:C	rs55916145	IDUA_3169_70	COVID_D1	16	-0.0681761	0.0344913	0.0480848	0.483695	0.4189	0.0243	1.36102e-66	-0.042739	0.027204	0.11617	cis		Yes	Not assessed
4:1029564:C:T	rs77143521	IDUA_3169_70	COVID_D1	16	-0.0681761	0.0344913	0.0480848	0.483695	-0.5525	0.0749	1.62502e-13	-0.024983	0.090738	0.783062	cis		Yes	Not assessed
4:1171342:G:T	rs11247975	IDUA_3169_70	COVID_D1	16	-0.0681761	0.0344913	0.0480848	0.483695	-0.1459	0.0267	4.64424e-08	0.022838	0.028357	0.420604	cis		Yes	Not assessed
4:714354:T:C	rs73221108	IDUA_3169_70	COVID_D1	16	-0.0681761	0.0344913	0.0480848	0.483695	-0.5847	0.0659	7.14999e-19	-0.086369	0.090754	0.341258	cis		Yes	Not assessed
4:793534:G:A	rs115071561	IDUA_3169_70	COVID_D1	16	-0.0681761	0.0344913	0.0480848	0.483695	0.4981	0.0565	1.18696e-18	-0.0093646	0.064111	0.883867	cis		Yes	Not assessed
4:800972:G:A	rs34951963	IDUA_3169_70	COVID_D1	16	-0.0681761	0.0344913	0.0480848	0.483695	0.5686	0.0901	2.77658e-10	0.10372	0.096513	0.282521	cis		Yes	Not assessed
4:857451:T:C	rs193280704	IDUA_3169_70	COVID_D1	16	-0.0681761	0.0344913	0.0480848	0.483695	1.1238	0.2031	3.14378e-08	-0.28191	0.20551	0.170139	cis		Yes	Not assessed
4:921439:G:A	rs76899536	IDUA_3169_70	COVID_D1	16	-0.0681761	0.0344913	0.0480848	0.483695	0.5586	0.0657	1.85898e-17	-0.14518	0.059869	0.01531	cis		Yes	Not assessed
4:947143:T:C	rs140892583	IDUA_3169_70	COVID_D1	16	-0.0681761	0.0344913	0.0480848	0.483695	-0.554	0.0843	4.97215e-11	0.25844	0.11522	0.024896	cis		Yes	Not assessed
4:991939:A:G	rs3822020	IDUA_3169_70	COVID_D1	16	-0.0681761	0.0344913	0.0480848	0.483695	0.608	0.0235	1.36418e-147	-0.012174	0.027889	0.662462	cis		Yes	Not assessed
3:190559206:G:T	rs2885370	IL1RAP_14048_7	COVID_D1	16	0.0657733	0.028171	0.0195546	0.483695	-0.2086	0.0306	9.29655e-12	-0.095713	0.036383	0.00852075	cis		Yes	Not assessed
3:190568399:A:G	rs71310871	IL1RAP_14048_7	COVID_D1	16	0.0657733	0.028171	0.0195546	0.483695	0.4596	0.0825	2.53414e-08	0.0074114	0.23876	0.975237	cis		Yes	Not assessed
3:190577941:A:G	rs6801017	IL1RAP_14048_7	COVID_D1	16	0.0657733	0.028171	0.0195546	0.483695	-0.2023	0.0306	3.81446e-11	-0.054831	0.032844	0.0950307	cis		Yes	Not assessed
3:190582543:C:A	rs140877895	IL1RAP_14048_7	COVID_D1	16	0.0657733	0.028171	0.0195546	0.483695	0.3615	0.0467	9.8716e-15	0.048132	0.051643	0.351329	cis		Yes	Not assessed
3:190586016:A:G	rs6444435	IL1RAP_14048_7	COVID_D1	16	0.0657733	0.028171	0.0195546	0.483695	-0.1705	0.026	5.46468e-11	-0.0077969	0.031411	0.803963	cis		Yes	Not assessed
3:190594581:C:G	rs73200020	IL1RAP_14048_7	COVID_D1	16	0.0657733	0.028171	0.0195546	0.483695	-0.3292	0.0567	6.39843e-09	-0.03531	0.079474	0.656828	cis		Yes	Not assessed
3:190605340:A:C	rs148444168	IL1RAP_14048_7	COVID_D1	16	0.0657733	0.028171	0.0195546	0.483695	1.2698	0.1265	1.03815e-23	0.19017	0.15703	0.225879	cis		Yes	Not assessed
3:190628271:A:G	rs6444442	IL1RAP_14048_7	COVID_D1	16	0.0657733	0.028171	0.0195546	0.483695	-1.352	0.0246	0	-0.097262	0.039108	0.0128822	cis		Yes	Not assessed
3:190629458:C:A	rs148996090	IL1RAP_14048_7	COVID_D1	16	0.0657733	0.028171	0.0195546	0.483695	1.1107	0.1365	4.05205e-16	-0.13463	0.20523	0.511827	cis		Yes	Not assessed
3:190629943:T:C	rs1024949	IL1RAP_14048_7	COVID_D1	16	0.0657733	0.028171	0.0195546	0.483695	-0.4479	0.0399	3.05432e-29	-0.0019818	0.047557	0.96676	cis		Yes	Not assessed
3:190639782:A:G	rs67249092	IL1RAP_14048_7	COVID_D1	16	0.0657733	0.028171	0.0195546	0.483695	-0.379	0.0345	4.48711e-28	0.051358	0.041691	0.217997	cis		Yes	Not assessed
3:190642782:C:T	rs3935774	IL1RAP_14048_7	COVID_D1	16	0.0657733	0.028171	0.0195546	0.483695	0.7411	0.1119	3.52273e-11	0.24644	0.13749	0.0730655	cis		Yes	Not assessed
3:190657144:G:A	rs78129851	IL1RAP_14048_7	COVID_D1	16	0.0657733	0.028171	0.0195546	0.483695	0.7929	0.1167	1.08806e-11	0.30371	0.15704	0.0531173	cis		Yes	Not assessed
3:190814114:C:T	rs36063565	IL1RAP_14048_7	COVID_D1	16	0.0657733	0.028171	0.0195546	0.483695	0.7522	0.0694	2.2586e-27	-0.029126	0.12396	0.814238	cis		Yes	Not assessed
3:190849419:G:A	rs1466889	IL1RAP_14048_7	COVID_D1	16	0.0657733	0.028171	0.0195546	0.483695	0.1977	0.0339	5.48134e-09	-0.0063105	0.032278	0.844998	cis		Yes	Not assessed
3:190559206:G:T	rs2885370	IL1RAP_2630_12	COVID_D1	17	0.0638961	0.0274444	0.0199013	0.483695	-0.2148	0.0306	2.22492e-12	-0.095713	0.036383	0.00852075	cis		Yes	Not assessed
3:190577941:A:G	rs6801017	IL1RAP_2630_12	COVID_D1	17	0.0638961	0.0274444	0.0199013	0.483695	-0.1903	0.0306	5.00479e-10	-0.054831	0.032844	0.0950307	cis		Yes	Not assessed
3:190582543:C:A	rs140877895	IL1RAP_2630_12	COVID_D1	17	0.0638961	0.0274444	0.0199013	0.483695	0.3963	0.0465	1.56037e-17	0.048132	0.051643	0.351329	cis		Yes	Not assessed
3:190586016:A:G	rs6444435	IL1RAP_2630_12	COVID_D1	17	0.0638961	0.0274444	0.0199013	0.483695	-0.1834	0.026	1.74039e-12	-0.0077969	0.031411	0.803963	cis		Yes	Not assessed
3:190594581:C:G	rs73200020	IL1RAP_2630_12	COVID_D1	17	0.0638961	0.0274444	0.0199013	0.483695	-0.3286	0.0567	6.81527e-09	-0.03531	0.079474	0.656828	cis		Yes	Not assessed
3:190605340:A:C	rs148444168	IL1RAP_2630_12	COVID_D1	17	0.0638961	0.0274444	0.0199013	0.483695	1.2597	0.1266	2.51583e-23	0.19017	0.15703	0.225879	cis		Yes	Not assessed
3:190609231:A:G	rs41268633	IL1RAP_2630_12	COVID_D1	17	0.0638961	0.0274444	0.0199013	0.483695	-0.3187	0.0503	2.35831e-10	-0.0070765	0.065319	0.913728	cis		Yes	Not assessed
3:190615966:C:T	rs62288218	IL1RAP_2630_12	COVID_D1	17	0.0638961	0.0274444	0.0199013	0.483695	-0.3211	0.0536	2.08976e-09	-0.080681	0.067245	0.230214	cis		Yes	Not assessed
3:190628271:A:G	rs6444442	IL1RAP_2630_12	COVID_D1	17	0.0638961	0.0274444	0.0199013	0.483695	-1.3827	0.0241	0	-0.097262	0.039108	0.0128822	cis		Yes	Not assessed
3:190629458:C:A	rs148996090	IL1RAP_2630_12	COVID_D1	17	0.0638961	0.0274444	0.0199013	0.483695	1.1474	0.1364	4.02997e-17	-0.13463	0.20523	0.511827	cis		Yes	Not assessed
3:190629943:T:C	rs1024949	IL1RAP_2630_12	COVID_D1	17	0.0638961	0.0274444	0.0199013	0.483695	-0.4835	0.0398	5.86129e-34	-0.0019818	0.047557	0.96676	cis		Yes	Not assessed
3:190642782:C:T	rs3935774	IL1RAP_2630_12	COVID_D1	17	0.0638961	0.0274444	0.0199013	0.483695	0.796	0.1118	1.08039e-12	0.24644	0.13749	0.0730655	cis		Yes	Not assessed
3:190645805:G:A	rs34879831	IL1RAP_2630_12	COVID_D1	17	0.0638961	0.0274444	0.0199013	0.483695	-0.398	0.0337	3.46195e-32	0.052355	0.04009	0.191574	cis		Yes	Not assessed
3:190657144:G:A	rs78129851	IL1RAP_2630_12	COVID_D1	17	0.0638961	0.0274444	0.0199013	0.483695	0.7929	0.1167	1.08806e-11	0.30371	0.15704	0.0531173	cis		Yes	Not assessed
3:190814114:C:T	rs36063565	IL1RAP_2630_12	COVID_D1	17	0.0638961	0.0274444	0.0199013	0.483695	0.8048	0.0692	2.89901e-31	-0.029126	0.12396	0.814238	cis		Yes	Not assessed
3:190829123:C:T	rs73888716	IL1RAP_2630_12	COVID_D1	17	0.0638961	0.0274444	0.0199013	0.483695	0.2448	0.0398	7.71156e-10	0.0033988	0.041532	0.934777	cis		Yes	Not assessed
5:149998127:TCAAA:T	rs140461335	PDGFRB_3459_49_2	COVID_D1	19	0.0641634	0.0287404	0.0255809	0.483695	-0.2661	0.0387	6.15699e-12	0.088077	0.062982	0.161979	cis		Yes	Not assessed
5:150056045:G:C	rs56327604	PDGFRB_3459_49_2	COVID_D1	19	0.0641634	0.0287404	0.0255809	0.483695	-0.4148	0.0652	1.99191e-10	-0.0053116	0.072971	0.941973	cis		Yes	Not assessed
5:150066032:A:G	rs216145	PDGFRB_3459_49_2	COVID_D1	19	0.0641634	0.0287404	0.0255809	0.483695	-0.2572	0.028	4.08805e-20	-0.037836	0.031214	0.225456	cis		Yes	Not assessed
5:150085686:G:A	rs2237085	PDGFRB_3459_49_2	COVID_D1	19	0.0641634	0.0287404	0.0255809	0.483695	-0.2735	0.0294	1.36896e-20	-0.047573	0.03392	0.160764	cis		Yes	Not assessed
5:150091737:T:C	rs79459330	PDGFRB_3459_49_2	COVID_D1	19	0.0641634	0.0287404	0.0255809	0.483695	0.2624	0.0403	7.45696e-11	0.007888	0.049472	0.873319	cis		Yes	Not assessed
5:150110414:G:A	rs12153782	PDGFRB_3459_49_2	COVID_D1	19	0.0641634	0.0287404	0.0255809	0.483695	0.5175	0.0847	9.97565e-10	0.17939	0.11861	0.130423	cis		Yes	Not assessed
5:150112084:A:G	rs115138219	PDGFRB_3459_49_2	COVID_D1	19	0.0641634	0.0287404	0.0255809	0.483695	0.4571	0.077	2.91413e-09	-0.017714	0.1008	0.860503	cis		Yes	Not assessed
5:150119258:C:T	rs3733676	PDGFRB_3459_49_2	COVID_D1	19	0.0641634	0.0287404	0.0255809	0.483695	-0.5734	0.0618	1.72176e-20	-0.1696	0.072245	0.0188965	cis		Yes	Not assessed
5:150123275:G:C	rs56388645	PDGFRB_3459_49_2	COVID_D1	19	0.0641634	0.0287404	0.0255809	0.483695	-0.5693	0.0911	4.12622e-10	-0.12966	0.090829	0.153431	cis		Yes	Not assessed
5:150124785:C:T	rs56072663	PDGFRB_3459_49_2	COVID_D1	19	0.0641634	0.0287404	0.0255809	0.483695	-0.562	0.0703	1.30301e-15	-0.060475	0.07725	0.433716	cis		Yes	Not assessed
5:150125301:T:C	rs112374268	PDGFRB_3459_49_2	COVID_D1	19	0.0641634	0.0287404	0.0255809	0.483695	-0.514	0.0765	1.83033e-11	-0.23262	0.079803	0.00355771	cis		Yes	Not assessed
5:150128981:C:G	rs2304058	PDGFRB_3459_49_2	COVID_D1	19	0.0641634	0.0287404	0.0255809	0.483695	0.9308	0.0203	0	0.054396	0.026845	0.0427341	cis		Yes	Not assessed
5:150132844:G:A	rs2229558	PDGFRB_3459_49_2	COVID_D1	19	0.0641634	0.0287404	0.0255809	0.483695	-0.7527	0.093	5.79513e-16	0.17019	0.12158	0.161568	cis		Yes	Not assessed
5:150133048:A:G	rs55670260	PDGFRB_3459_49_2	COVID_D1	19	0.0641634	0.0287404	0.0255809	0.483695	-0.5584	0.0843	3.49697e-11	-0.1106	0.089262	0.215327	cis		Yes	Not assessed
5:150147510:C:A	rs115670940	PDGFRB_3459_49_2	COVID_D1	19	0.0641634	0.0287404	0.0255809	0.483695	0.3926	0.0713	3.6643e-08	-0.14348	0.0767	0.0613915	cis		Yes	Not assessed
5:150148335:C:T	rs139009243	PDGFRB_3459_49_2	COVID_D1	19	0.0641634	0.0287404	0.0255809	0.483695	0.5895	0.0798	1.49933e-13	0.13747	0.10025	0.17029	cis		Yes	Not assessed
5:150152786:T:C	rs188825016	PDGFRB_3459_49_2	COVID_D1	19	0.0641634	0.0287404	0.0255809	0.483695	-0.6998	0.1091	1.41472e-10	0.08409	0.13242	0.525412	cis		Yes	Not assessed
5:150193386:C:G	rs917585	PDGFRB_3459_49_2	COVID_D1	19	0.0641634	0.0287404	0.0255809	0.483695	-0.2005	0.0247	4.76242e-16	0.042331	0.02652	0.110446	cis		Yes	Not assessed
5:150225114:A:T	rs72837588	PDGFRB_3459_49_2	COVID_D1	19	0.0641634	0.0287404	0.0255809	0.483695	-0.3179	0.0544	5.10386e-09	-0.086617	0.076032	0.254612	cis		Yes	Not assessed
1:19839965:G:A	rs6426832	PLA2G2A_2692_74_2	COVID_D1	13	-0.0603566	0.030258	0.046072	0.483695	-0.1815	0.0256	1.34264e-12	0.0002436	0.027553	0.992946	cis		Yes	Not assessed
1:19888485:G:C	rs112483005	PLA2G2A_2692_74_2	COVID_D1	13	-0.0603566	0.030258	0.046072	0.483695	0.742	0.0896	1.21889e-16	-0.23961	0.1214	0.0484132	cis		Yes	Not assessed
1:19966255:C:T	rs182776958	PLA2G2A_2692_74_2	COVID_D1	13	-0.0603566	0.030258	0.046072	0.483695	0.7107	0.0959	1.25498e-13	-0.16459	0.10175	0.105751	cis		Yes	Not assessed
1:19971259:A:T	rs10916682	PLA2G2A_2692_74_2	COVID_D1	13	-0.0603566	0.030258	0.046072	0.483695	-0.3583	0.0367	1.62374e-22	0.062569	0.041755	0.134009	cis		Yes	Not assessed
1:19979653:G:C	rs11573156	PLA2G2A_2692_74_2	COVID_D1	13	-0.0603566	0.030258	0.046072	0.483695	1.0205	0.0243	0	-0.057809	0.03124	0.0642444	cis		Yes	Not assessed
1:19984785:G:C	rs116205673	PLA2G2A_2692_74_2	COVID_D1	13	-0.0603566	0.030258	0.046072	0.483695	-0.2729	0.0325	4.5833e-17	0.013586	0.035486	0.701827	cis		Yes	Not assessed
1:20006402:A:G	rs188825593	PLA2G2A_2692_74_2	COVID_D1	13	-0.0603566	0.030258	0.046072	0.483695	0.9578	0.105	7.38154e-20	-0.31636	0.19559	0.105778	cis		Yes	Not assessed
1:20011923:G:A	rs1605318	PLA2G2A_2692_74_2	COVID_D1	13	-0.0603566	0.030258	0.046072	0.483695	0.2669	0.0313	1.49989e-17	-0.029546	0.033769	0.381604	cis		Yes	Not assessed
1:20019699:A:G	rs7545093	PLA2G2A_2692_74_2	COVID_D1	13	-0.0603566	0.030258	0.046072	0.483695	-0.3077	0.0441	3.00855e-12	0.11834	0.053064	0.0257383	cis		Yes	Not assessed
1:20056228:C:T	rs112575131	PLA2G2A_2692_74_2	COVID_D1	13	-0.0603566	0.030258	0.046072	0.483695	0.9016	0.1205	7.31121e-14	0.25175	0.13769	0.0674922	cis		Yes	Not assessed
1:20098865:GC:G	rs34300542	PLA2G2A_2692_74_2	COVID_D1	13	-0.0603566	0.030258	0.046072	0.483695	0.2311	0.0326	1.35126e-12	0.075819	0.061917	0.220754	cis		Yes	Not assessed
1:20381638:G:A	rs151093816	PLA2G2A_2692_74_2	COVID_D1	13	-0.0603566	0.030258	0.046072	0.483695	0.399	0.0718	2.74289e-08	-0.089213	0.073769	0.226526	cis		Yes	Not assessed
22:50188362:C:A	rs5771215	PLXNB2_9216_100_3	COVID_D1	11	-0.101835	0.0498748	0.04117	0.483695	-0.1465	0.0256	1.04871e-08	0.039701	0.027848	0.153975	cis		Yes	Not assessed
22:50215466:G:C	rs909687	PLXNB2_9216_100_3	COVID_D1	11	-0.101835	0.0498748	0.04117	0.483695	0.1393	0.025	2.51831e-08	-0.012808	0.027008	0.635336	cis		Yes	Not assessed
22:50231720:G:A	rs62239326	PLXNB2_9216_100_3	COVID_D1	11	-0.101835	0.0498748	0.04117	0.483695	-0.2174	0.0366	2.85212e-09	0.051333	0.042113	0.222869	cis		Yes	Not assessed
22:50247942:C:T	rs34402301	PLXNB2_9216_100_3	COVID_D1	11	-0.101835	0.0498748	0.04117	0.483695	0.3044	0.05	1.1433e-09	-0.083839	0.061262	0.171146	cis		Yes	Not assessed
22:50279861:C:A	rs112116434	PLXNB2_9216_100_3	COVID_D1	11	-0.101835	0.0498748	0.04117	0.483695	0.6008	0.1045	8.96231e-09	-0.073077	0.14392	0.611621	cis		Yes	Not assessed
22:50283738:T:C	rs28470336	PLXNB2_9216_100_3	COVID_D1	11	-0.101835	0.0498748	0.04117	0.483695	0.3325	0.0528	3.0278e-10	0.064722	0.076475	0.397377	cis		Yes	Not assessed
22:50289363:T:C	rs28573806	PLXNB2_9216_100_3	COVID_D1	11	-0.101835	0.0498748	0.04117	0.483695	0.5315	0.0232	3.73756e-116	-0.057401	0.02863	0.0449711	cis		Yes	Not assessed
22:50292996:C:T	rs117274589	PLXNB2_9216_100_3	COVID_D1	11	-0.101835	0.0498748	0.04117	0.483695	0.4743	0.0743	1.72995e-10	-0.14136	0.096566	0.14323	cis		Yes	Not assessed
22:50300005:A:G	rs28647660	PLXNB2_9216_100_3	COVID_D1	11	-0.101835	0.0498748	0.04117	0.483695	0.4358	0.0495	1.31977e-18	-0.018214	0.05819	0.754274	cis		Yes	Not assessed
22:50313118:GA:G	rs151293382	PLXNB2_9216_100_3	COVID_D1	11	-0.101835	0.0498748	0.04117	0.483695	-0.3573	0.0542	4.33208e-11	-0.083491	0.08986	0.352825	cis		Yes	Not assessed
9:133275050:C:T	rs616154	PLXNB2_9216_100_3	COVID_D1	11	-0.101835	0.0498748	0.04117	0.483695	-0.1358	0.0247	3.84176e-08	0.0041156	0.026363	0.875944	trans	ABO	Yes	Not assessed
1:169406725:T:G	rs182855188	SELP_4154_57_2	COVID_D1	11	0.0876808	0.0372465	0.0185694	0.483695	-0.5102	0.093	4.11087e-08	-0.039801	0.11399	0.726968	cis		Yes	Not assessed
1:169534258:C:T	rs140217668	SELP_4154_57_2	COVID_D1	11	0.0876808	0.0372465	0.0185694	0.483695	-0.5534	0.093	2.67263e-09	-0.12061	0.10408	0.24653	cis		Yes	Not assessed
1:169578479:G:A	rs12755775	SELP_4154_57_2	COVID_D1	11	0.0876808	0.0372465	0.0185694	0.483695	0.2588	0.0415	4.48487e-10	-0.035904	0.058058	0.536301	cis		Yes	Not assessed
1:169593666:C:T	rs6128	SELP_4154_57_2	COVID_D1	11	0.0876808	0.0372465	0.0185694	0.483695	-0.3584	0.0336	1.45762e-26	-0.06858	0.036956	0.0634934	cis		Yes	Not assessed
1:169594713:T:G	rs6136	SELP_4154_57_2	COVID_D1	11	0.0876808	0.0372465	0.0185694	0.483695	-0.8073	0.0371	5.54179e-105	-0.073167	0.042802	0.0873714	cis		Yes	Not assessed
1:169610584:G:T	rs2235303	SELP_4154_57_2	COVID_D1	11	0.0876808	0.0372465	0.0185694	0.483695	-0.2071	0.0247	5.08919e-17	0.0081136	0.027605	0.768821	cis		Yes	Not assessed
1:169766268:A:G	rs79180034	SELP_4154_57_2	COVID_D1	11	0.0876808	0.0372465	0.0185694	0.483695	-0.3715	0.0554	2.00339e-11	-0.018797	0.062716	0.764394	cis		Yes	Not assessed
1:247559286:G:A	rs74227709	SELP_4154_57_2	COVID_D1	11	0.0876808	0.0372465	0.0185694	0.483695	0.3465	0.0467	1.17386e-13	0.0050315	0.05511	0.927255	trans	OR2C3	Yes	Not assessed
3:72317134:G:A	rs9820851	SELP_4154_57_2	COVID_D1	11	0.0876808	0.0372465	0.0185694	0.483695	0.176	0.0313	1.87666e-08	-0.00087303	0.036045	0.980677	trans	RYBP	Yes	Not assessed
8:105569300:A:T	rs6993770	SELP_4154_57_2	COVID_D1	11	0.0876808	0.0372465	0.0185694	0.483695	-0.1788	0.0274	6.77536e-11	-0.071758	0.030004	0.0167745	trans	AC103853.1	Yes	Not assessed
9:133274295:A:T	rs115478735	SELP_4154_57_2	COVID_D1	11	0.0876808	0.0372465	0.0185694	0.483695	-0.4509	0.0313	4.76116e-47	0.067778	0.055755	0.224122	trans	ABO	Yes	Not assessed
7:83100286:T:A	rs185676951	SEMA3E_5363_51_3	COVID_D1	19	-0.0688659	0.0282923	0.0149295	0.483695	-0.6135	0.1077	1.22379e-08	-0.13343	0.12909	0.301314	cis		Yes	Not assessed
7:83107733:A:G	rs6975088	SEMA3E_5363_51_3	COVID_D1	19	-0.0688659	0.0282923	0.0149295	0.483695	0.1412	0.0252	2.10461e-08	0.057107	0.042894	0.183073	cis		Yes	Not assessed
7:83162690:C:T	rs62622792	SEMA3E_5363_51_3	COVID_D1	19	-0.0688659	0.0282923	0.0149295	0.483695	-0.5624	0.0794	1.40941e-12	0.032317	0.091695	0.724508	cis		Yes	Not assessed
7:83167229:A:T	rs62458620	SEMA3E_5363_51_3	COVID_D1	19	-0.0688659	0.0282923	0.0149295	0.483695	0.2902	0.0524	3.05652e-08	-0.070235	0.05985	0.240588	cis		Yes	Not assessed
7:83220570:G:A	rs150009827	SEMA3E_5363_51_3	COVID_D1	19	-0.0688659	0.0282923	0.0149295	0.483695	-0.8829	0.105	4.15035e-17	-0.034883	0.14289	0.807134	cis		Yes	Not assessed
7:83243258:A:T	rs73165984	SEMA3E_5363_51_3	COVID_D1	19	-0.0688659	0.0282923	0.0149295	0.483695	-0.7585	0.1181	1.34034e-10	0.096124	0.12935	0.457402	cis		Yes	Not assessed
7:83333511:G:A	rs34388701	SEMA3E_5363_51_3	COVID_D1	19	-0.0688659	0.0282923	0.0149295	0.483695	0.2811	0.0252	6.78743e-29	-0.03903	0.02766	0.158226	cis		Yes	Not assessed
7:83352025:A:C	rs545409966	SEMA3E_5363_51_3	COVID_D1	19	-0.0688659	0.0282923	0.0149295	0.483695	-1.0421	0.1039	1.12703e-23	0.26997	0.17527	0.123485	cis		Yes	Not assessed
7:83369100:T:C	rs73169960	SEMA3E_5363_51_3	COVID_D1	19	-0.0688659	0.0282923	0.0149295	0.483695	-0.2773	0.0318	2.77893e-18	-0.027089	0.033026	0.412084	cis		Yes	Not assessed
7:83405046:G:C	rs3757607	SEMA3E_5363_51_3	COVID_D1	19	-0.0688659	0.0282923	0.0149295	0.483695	-1.1204	0.0323	1.22418e-263	0.064001	0.039352	0.10387	cis		Yes	Not assessed
7:83427634:G:A	rs74878046	SEMA3E_5363_51_3	COVID_D1	19	-0.0688659	0.0282923	0.0149295	0.483695	0.2973	0.0496	2.04802e-09	0.0015505	0.064475	0.980814	cis		Yes	Not assessed
7:83446937:C:T	rs187536849	SEMA3E_5363_51_3	COVID_D1	19	-0.0688659	0.0282923	0.0149295	0.483695	0.6331	0.1045	1.37505e-09	-0.076669	0.12106	0.526529	cis		Yes	Not assessed
7:83566286:G:T	rs113444060	SEMA3E_5363_51_3	COVID_D1	19	-0.0688659	0.0282923	0.0149295	0.483695	-0.393	0.0559	2.05925e-12	0.036241	0.073917	0.623926	cis		Yes	Not assessed
7:83647552:T:G	rs118126619	SEMA3E_5363_51_3	COVID_D1	19	-0.0688659	0.0282923	0.0149295	0.483695	0.6818	0.0801	1.71165e-17	0.093525	0.10166	0.357584	cis		Yes	Not assessed
7:83649577:C:T	rs109467	SEMA3E_5363_51_3	COVID_D1	19	-0.0688659	0.0282923	0.0149295	0.483695	-0.5101	0.0241	1.96652e-99	0.046137	0.028074	0.100299	cis		Yes	Not assessed
7:83672142:C:T	rs646631	SEMA3E_5363_51_3	COVID_D1	19	-0.0688659	0.0282923	0.0149295	0.483695	-0.1586	0.0252	3.10085e-10	-0.017505	0.027179	0.519534	cis		Yes	Not assessed
7:83793821:T:A	rs12707601	SEMA3E_5363_51_3	COVID_D1	19	-0.0688659	0.0282923	0.0149295	0.483695	0.1423	0.0259	3.92467e-08	0.019371	0.032606	0.55245	cis		Yes	Not assessed
19:13976433:G:A	rs193200684	IL27RA_5132_71	COVID_C2	12	0.0410645	0.0190144	0.0307992	0.495146	-0.8992	0.1492	1.67228e-09	0.14347	0.18053	0.426779	cis		No	Not a missense variant or in LD with missense variants
19:13904630:C:T	rs150059600	IL27RA_5132_71	COVID_C2	12	0.0410645	0.0190144	0.0307992	0.495146	-0.247	0.0348	1.26849e-12	-0.041071	0.021068	0.0512418	cis		Yes	Not assessed
19:13986913:C:T	rs117048985	IL27RA_5132_71	COVID_C2	12	0.0410645	0.0190144	0.0307992	0.495146	-0.9067	0.1398	8.83244e-11	-0.069608	0.12884	0.589013	cis		Yes	Not assessed
19:13992556:G:A	rs143394052	IL27RA_5132_71	COVID_C2	12	0.0410645	0.0190144	0.0307992	0.495146	-0.8173	0.1304	3.66566e-10	0.0073428	0.097841	0.940176	cis		Yes	Not assessed
19:14032339:G:C	rs2306191	IL27RA_5132_71	COVID_C2	12	0.0410645	0.0190144	0.0307992	0.495146	0.3166	0.0375	3.10179e-17	0.024418	0.024538	0.319683	cis		Yes	Not assessed
19:14042481:T:C	rs35026308	IL27RA_5132_71	COVID_C2	12	0.0410645	0.0190144	0.0307992	0.495146	-0.9457	0.0286	9.0312e-240	-0.024692	0.019836	0.213203	cis		Yes	Not assessed
19:14043668:G:C	rs10409832	IL27RA_5132_71	COVID_C2	12	0.0410645	0.0190144	0.0307992	0.495146	-0.2284	0.0381	2.03798e-09	-0.023387	0.026556	0.378498	cis		Yes	Not assessed
19:14044781:T:C	rs62122122	IL27RA_5132_71	COVID_C2	12	0.0410645	0.0190144	0.0307992	0.495146	-0.8755	0.1187	1.63438e-13	0.21895	0.11218	0.0509651	cis		Yes	Not assessed
19:14067016:T:C	rs74183053	IL27RA_5132_71	COVID_C2	12	0.0410645	0.0190144	0.0307992	0.495146	0.1559	0.0263	3.07101e-09	0.0056659	0.016993	0.738813	cis		Yes	Not assessed
19:14172972:T:C	rs117873661	IL27RA_5132_71	COVID_C2	12	0.0410645	0.0190144	0.0307992	0.495146	-0.5951	0.0793	6.17042e-14	-0.035162	0.050569	0.48685	cis		Yes	Not assessed
19:14222653:T:G	rs7259221	IL27RA_5132_71	COVID_C2	12	0.0410645	0.0190144	0.0307992	0.495146	0.1662	0.0297	2.19405e-08	-0.0069053	0.018821	0.713699	cis		Yes	Not assessed
9:133256028:C:T	rs8176743	IL27RA_5132_71	COVID_C2	12	0.0410645	0.0190144	0.0307992	0.495146	0.4929	0.0486	3.5975e-24	0.042539	0.022707	0.061015	trans	ABO	Yes	Not assessed
6:30796702:T:A	rs202196815	C4A_C4B_4481	COVID_A1	26	0.519865	0.206573	0.0118486	0.543102	1.0728	0.1515	1.42924e-12	1.2653	1.2016	0.292335	trans	HCG20	No	Not a missense variant or in LD with missense variants
19:5840622:G:A	rs369325804	FUT3_4548_4	COVID_A2	17	-0.374828	0.17102	0.0284002	0.543102	-0.9539	0.1717	2.76628e-08	-0.066179	0.31851	0.835403	cis		No	Not a missense variant or in LD with missense variants
19:5840622:G:A	rs369325804	FUT3_4548_4	COVID_D1	17	-0.374828	0.17102	0.0284002	0.543102	-0.9539	0.1717	2.76628e-08	-0.36203	0.21975	0.0994629	cis		No	Not a missense variant or in LD with missense variants
6:28100270:T:C	rs73396583	C4A_C4B_4481	COVID_A1	26	0.519865	0.206573	0.0118486	0.543102	0.2305	0.0407	1.48411e-08	0.011534	0.23391	0.960673	trans	ZSCAN9	Yes	Not assessed
6:29842083:G:A	rs1476570	C4A_C4B_4481	COVID_A1	26	0.519865	0.206573	0.0118486	0.543102	0.2064	0.0281	2.05458e-13	-0.28744	0.17925	0.108809	trans	HLA-G	Yes	Not assessed
6:29854294:A:G	rs9258643	C4A_C4B_4481	COVID_A1	26	0.519865	0.206573	0.0118486	0.543102	-0.167	0.0275	1.25756e-09	-0.076258	0.19691	0.698554	trans	HLA-G	Yes	Not assessed
6:30345563:G:C	rs6986	C4A_C4B_4481	COVID_A1	26	0.519865	0.206573	0.0118486	0.543102	0.1643	0.0299	3.90747e-08	0.082738	0.1875	0.659018	trans	RPP21	Yes	Not assessed
6:31268473:A:C	rs9394047	C4A_C4B_4481	COVID_A1	26	0.519865	0.206573	0.0118486	0.543102	0.3722	0.0474	4.08409e-15	0.28504	0.2721	0.294843	cis		Yes	Not assessed		Legend
6:31303926:A:T	rs11962586	C4A_C4B_4481	COVID_A1	26	0.519865	0.206573	0.0118486	0.543102	-0.3455	0.0445	8.22627e-15	0.28229	0.34168	0.408701	cis		Yes	Not assessed		snp	snp used to genetically represent protein probe in the format chr:pos:ref:alt, with position from GRCh38 build
6:31327176:C:T	rs116074669	C4A_C4B_4481	COVID_A1	26	0.519865	0.206573	0.0118486	0.543102	0.2942	0.053	2.84132e-08	0.46185	0.67128	0.491444	cis		Yes	Not assessed		probe	protein probe used by SomaLogic to quantify protein abundance
6:31347808:G:T	rs36119838	C4A_C4B_4481	COVID_A1	26	0.519865	0.206573	0.0118486	0.543102	0.2565	0.0449	1.11201e-08	0.071639	0.20789	0.730395	cis		Yes	Not assessed		outcome	COVID outcome (for definitions, see COVID_definitions)
6:31381950:C:T	rs9266716	C4A_C4B_4481	COVID_A1	26	0.519865	0.206573	0.0118486	0.543102	-0.2208	0.0265	7.94373e-17	-0.048586	0.15545	0.754622	cis		Yes	Not assessed		nsnps	Number of SNPs used as cis-acting instruments for each protein probe
6:31515359:A:G	rs2844495	C4A_C4B_4481	COVID_A1	26	0.519865	0.206573	0.0118486	0.543102	0.2951	0.0258	2.70087e-30	0.14325	0.15411	0.352614	cis		Yes	Not assessed		bxy	log odds ratio of outcome per SD of genetically predicted protein probe
6:31636814:C:T	rs10885	C4A_C4B_4481	COVID_A1	26	0.519865	0.206573	0.0118486	0.543102	-0.3871	0.0302	1.30211e-37	-0.30714	0.21463	0.152424	cis		Yes	Not assessed		bxy_se	standard error of bxy
6:31697675:G:A	rs805273	C4A_C4B_4481	COVID_A1	26	0.519865	0.206573	0.0118486	0.543102	0.5861	0.0549	1.32151e-26	0.45307	0.3392	0.181647	cis		Yes	Not assessed		bxy_p	p-value of bxy
6:31773713:G:C	rs9469051	C4A_C4B_4481	COVID_A1	26	0.519865	0.206573	0.0118486	0.543102	0.3334	0.0353	3.56222e-21	0.39849	0.17242	0.0208241	cis		Yes	Not assessed		fdr	fdr-corrected p-value of bxy for each outcome
6:31849037:G:A	rs190789983	C4A_C4B_4481	COVID_A1	26	0.519865	0.206573	0.0118486	0.543102	0.6602	0.1087	1.25076e-09	1.3301	0.75583	0.0784439	cis		Yes	Not assessed		bzx	Estimate of the association between snp and protein probe
6:31977074:T:C	rs41315816	C4A_C4B_4481	COVID_A1	26	0.519865	0.206573	0.0118486	0.543102	0.4545	0.0511	5.87755e-19	0.90147	0.28733	0.00170452	cis		Yes	Not assessed		bzx_se	standard error of bzx
6:32037872:A:G	rs396458	C4A_C4B_4481	COVID_A1	26	0.519865	0.206573	0.0118486	0.543102	0.4755	0.0349	2.85809e-42	0.15188	0.21407	0.478022	cis		Yes	Not assessed		bzx_pval	p-value of bzx
6:32062923:C:T	rs9267797	C4A_C4B_4481	COVID_A1	26	0.519865	0.206573	0.0118486	0.543102	-0.7688	0.1011	2.86335e-14	-0.85584	0.69355	0.217203	cis		Yes	Not assessed		bzy	Estimate of the association between snp and outcome
6:32162552:C:G	rs34129552	C4A_C4B_4481	COVID_A1	26	0.519865	0.206573	0.0118486	0.543102	0.5082	0.0723	2.07951e-12	0.010056	0.37705	0.978723	cis		Yes	Not assessed		bzy_se	standard error of bzy
6:32211932:A:G	rs16869834	C4A_C4B_4481	COVID_A1	26	0.519865	0.206573	0.0118486	0.543102	-0.6193	0.0575	4.74754e-27	0.50363	0.33118	0.128332	cis		Yes	Not assessed		bzy_pval	p-value of bzy
6:32465869:C:T	rs41291802	C4A_C4B_4481	COVID_A1	26	0.519865	0.206573	0.0118486	0.543102	0.3131	0.0348	2.31703e-19	-0.29877	0.25996	0.250436	cis		Yes	Not assessed		cistrans	whether snp is cis-acting with respect to protein probe
6:32644280:T:A	rs28371173	C4A_C4B_4481	COVID_A1	26	0.519865	0.206573	0.0118486	0.543102	0.3749	0.0343	8.28218e-28	0.63444	0.30059	0.0348025	cis		Yes	Not assessed		transgene	if snp is trans-acting to protein protein probe, the gene with the higher V2G score from Open Targets Genetics portal linked to the variant
6:32763847:T:G	rs1573646	C4A_C4B_4481	COVID_A1	26	0.519865	0.206573	0.0118486	0.543102	0.183	0.0246	1.01432e-13	0.060625	0.14596	0.677883	cis		Yes	Not assessed		cis-eqtl	whether snp has effect on gene expression in any tissues assessed in the Open Targets Genetics Portal
6:32800535:A:G	rs2857149	C4A_C4B_4481	COVID_A1	26	0.519865	0.206573	0.0118486	0.543102	0.1575	0.0262	1.83871e-09	-0.24379	0.22461	0.277748	cis		Yes	Not assessed		missense	whether snp is a missense variant
6:32901268:T:C	rs241402	C4A_C4B_4481	COVID_A1	26	0.519865	0.206573	0.0118486	0.543102	-0.1422	0.0253	1.90347e-08	-0.24722	0.16279	0.128852	cis		Yes	Not assessed
6:32988199:A:G	rs188245	C4A_C4B_4481	COVID_A1	26	0.519865	0.206573	0.0118486	0.543102	-0.174	0.0241	5.20193e-13	-0.21407	0.16006	0.18108	trans	HLA-DMB	Yes	Not assessed
19:48702851:C:G	rs679574	FUT3_4548_4	COVID_A1	17	-0.374828	0.17102	0.0284002	0.543102	-0.1994	0.0243	2.29134e-16	-0.11399	0.15959	0.475062	trans	FUT2	Yes	Not assessed
19:5759405:A:T	rs3097893	FUT3_4548_4	COVID_A1	17	-0.374828	0.17102	0.0284002	0.543102	0.2339	0.0325	6.15865e-13	-0.18322	0.22798	0.421589	cis		Yes	Not assessed
19:5790861:C:T	rs185897394	FUT3_4548_4	COVID_A1	17	-0.374828	0.17102	0.0284002	0.543102	-1.055	0.1914	3.54745e-08	0.24744	0.95965	0.796527	cis		Yes	Not assessed
19:5810373:G:A	rs6510858	FUT3_4548_4	COVID_A1	17	-0.374828	0.17102	0.0284002	0.543102	-0.1931	0.0313	6.85804e-10	-0.12725	0.18608	0.494073	cis		Yes	Not assessed
19:5817525:G:T	rs146715395	FUT3_4548_4	COVID_A1	17	-0.374828	0.17102	0.0284002	0.543102	-0.6874	0.0839	2.5461e-16	-0.14161	0.762	0.85257	cis		Yes	Not assessed
19:5822697:C:G	rs2436519	FUT3_4548_4	COVID_A1	17	-0.374828	0.17102	0.0284002	0.543102	-0.286	0.0262	9.66271e-28	0.11287	0.15006	0.451951	cis		Yes	Not assessed
19:5838649:G:T	rs147625395	FUT3_4548_4	COVID_A1	17	-0.374828	0.17102	0.0284002	0.543102	-0.7873	0.096	2.38313e-16	0.88451	0.55296	0.109689	cis		Yes	Not assessed
19:5839928:C:T	rs112358826	FUT3_4548_4	COVID_A1	17	-0.374828	0.17102	0.0284002	0.543102	-0.8036	0.1156	3.61276e-12	-0.98276	0.64313	0.12649	cis		Yes	Not assessed
19:5840608:C:T	rs708686	FUT3_4548_4	COVID_A1	17	-0.374828	0.17102	0.0284002	0.543102	-0.853	0.0242	3.69035e-272	0.37166	0.15289	0.0150615	cis		Yes	Not assessed
19:5842308:T:A	rs28381972	FUT3_4548_4	COVID_A1	17	-0.374828	0.17102	0.0284002	0.543102	0.3012	0.0465	9.33046e-11	-0.41682	0.41451	0.314621	cis		Yes	Not assessed
19:5844332:C:T	rs3745635	FUT3_4548_4	COVID_A1	17	-0.374828	0.17102	0.0284002	0.543102	-0.7087	0.0944	6.03062e-14	-0.038921	0.59293	0.947663	cis		Yes	Not assessed
19:5852910:G:A	rs28742583	FUT3_4548_4	COVID_A1	17	-0.374828	0.17102	0.0284002	0.543102	-0.6555	0.0754	3.51027e-18	0.092762	0.58282	0.873542	cis		Yes	Not assessed
19:5856563:C:T	rs708687	FUT3_4548_4	COVID_A1	17	-0.374828	0.17102	0.0284002	0.543102	-0.2941	0.033	5.00654e-19	-0.01762	0.21766	0.93548	cis		Yes	Not assessed
19:5856726:C:G	rs112707843	FUT3_4548_4	COVID_A1	17	-0.374828	0.17102	0.0284002	0.543102	0.2369	0.0404	4.52225e-09	0.17536	0.25989	0.499837	cis		Yes	Not assessed
19:5860366:C:G	rs74174349	FUT3_4548_4	COVID_A1	17	-0.374828	0.17102	0.0284002	0.543102	0.5586	0.0963	6.6069e-09	-0.74584	0.87406	0.39349	cis		Yes	Not assessed
19:5867902:G:A	rs778972	FUT3_4548_4	COVID_A1	17	-0.374828	0.17102	0.0284002	0.543102	0.1769	0.0296	2.28191e-09	0.034643	0.18934	0.854824	cis		Yes	Not assessed
19:5990944:T:C	rs8108685	FUT3_4548_4	COVID_A1	17	-0.374828	0.17102	0.0284002	0.543102	-0.3544	0.0594	2.42649e-09	-0.050045	0.43502	0.908413	cis		Yes	Not assessed
10:71771220:C:A	rs10762476	GRN_4992_49	COVID_A1	12	0.404246	0.182271	0.026567	0.543102	-0.195	0.0353	3.31218e-08	0.43821	0.222	0.048391	trans	VSIR	Yes	Not assessed
10:71809561:C:T	rs4747199	GRN_4992_49	COVID_A1	12	0.404246	0.182271	0.026567	0.543102	-0.2365	0.0273	4.59494e-18	0.034924	0.16266	0.829997	trans	CDH23	Yes	Not assessed
10:71881333:G:A	rs7068317	GRN_4992_49	COVID_A1	12	0.404246	0.182271	0.026567	0.543102	0.2044	0.0274	8.66184e-14	0.039948	0.15175	0.792359	trans	PSAP	Yes	Not assessed
16:75252586:G:A	rs72802395	GRN_4992_49	COVID_A1	12	0.404246	0.182271	0.026567	0.543102	-0.2827	0.0443	1.75373e-10	-0.52607	0.26307	0.045529	trans	BCAR1	Yes	Not assessed
17:44352876:C:T	rs5848	GRN_4992_49	COVID_A1	12	0.404246	0.182271	0.026567	0.543102	-0.2763	0.0281	8.13739e-23	0.038772	0.1681	0.817588	cis		Yes	Not assessed
1:108931184:G:A	rs149700491	GRN_4992_49	COVID_A1	12	0.404246	0.182271	0.026567	0.543102	-0.607	0.1033	4.20072e-09	-0.56664	0.74516	0.446999	trans	CLCC1	Yes	Not assessed
1:109060943:C:T	rs9697383	GRN_4992_49	COVID_A1	12	0.404246	0.182271	0.026567	0.543102	0.1497	0.0251	2.45921e-09	0.093846	0.14577	0.519708	trans	TAF13	Yes	Not assessed
1:109155187:A:T	rs57217149	GRN_4992_49	COVID_A1	12	0.404246	0.182271	0.026567	0.543102	-0.3173	0.0491	1.03109e-10	-0.021834	0.35799	0.951367	trans	KIAA1324	Yes	Not assessed
1:109185258:T:C	rs41279684	GRN_4992_49	COVID_A1	12	0.404246	0.182271	0.026567	0.543102	0.2421	0.0328	1.5699e-13	0.18432	0.19349	0.340789	trans	KIAA1324	Yes	Not assessed
1:109225539:T:C	rs7547246	GRN_4992_49	COVID_A1	12	0.404246	0.182271	0.026567	0.543102	-0.2209	0.0307	6.22598e-13	-0.098372	0.18389	0.592684	trans	KIAA1324	Yes	Not assessed
1:109275908:C:T	rs646776	GRN_4992_49	COVID_A1	12	0.404246	0.182271	0.026567	0.543102	0.8254	0.0266	2.11888e-211	0.40499	0.17357	0.0196327	trans	CELSR2	Yes	Not assessed
1:109282936:C:A	rs138361368	GRN_4992_49	COVID_A1	12	0.404246	0.182271	0.026567	0.543102	-0.6325	0.0874	4.59252e-13	-0.45597	0.56398	0.418811	trans	PSRC1	Yes	Not assessed
22:17105741:G:A	rs4819959	IL17RA_2992_59	COVID_A1	12	-0.353472	0.159724	0.0268959	0.543102	0.9127	0.0195	0	-0.3065	0.16018	0.0556876	cis		Yes	Not assessed
22:17117065:C:T	rs9605219	IL17RA_2992_59	COVID_A1	12	-0.353472	0.159724	0.0268959	0.543102	-0.6751	0.0535	1.66566e-36	0.46615	0.31417	0.137875	cis		Yes	Not assessed
22:17126595:T:C	rs77579439	IL17RA_2992_59	COVID_A1	12	-0.353472	0.159724	0.0268959	0.543102	0.8164	0.131	4.60338e-10	0.76487	0.97417	0.432365	cis		Yes	Not assessed
22:17128692:A:G	rs80318002	IL17RA_2992_59	COVID_A1	12	-0.353472	0.159724	0.0268959	0.543102	-0.8841	0.1114	2.08359e-15	0.11191	1.0104	0.911808	cis		Yes	Not assessed
22:17139058:C:T	rs140756712	IL17RA_2992_59	COVID_A1	12	-0.353472	0.159724	0.0268959	0.543102	0.9132	0.1051	3.6607e-18	-0.46859	0.5398	0.38535	cis		Yes	Not assessed
22:17142947:A:G	rs5747009	IL17RA_2992_59	COVID_A1	12	-0.353472	0.159724	0.0268959	0.543102	0.5573	0.0261	3.69703e-101	-0.10146	0.1666	0.542522	cis		Yes	Not assessed
22:17151243:C:T	rs73149858	IL17RA_2992_59	COVID_A1	12	-0.353472	0.159724	0.0268959	0.543102	-0.5339	0.0602	7.39577e-19	0.81427	0.34766	0.0191733	cis		Yes	Not assessed
22:17159155:G:A	rs7287672	IL17RA_2992_59	COVID_A1	12	-0.353472	0.159724	0.0268959	0.543102	0.1631	0.0269	1.33442e-09	-0.26314	0.16663	0.114293	cis		Yes	Not assessed
22:17160290:A:C	rs145618343	IL17RA_2992_59	COVID_A1	12	-0.353472	0.159724	0.0268959	0.543102	-0.7721	0.081	1.54135e-21	-0.39585	0.8476	0.640482	cis		Yes	Not assessed
22:17193227:C:T	rs4819973	IL17RA_2992_59	COVID_A1	12	-0.353472	0.159724	0.0268959	0.543102	0.1955	0.0278	2.03048e-12	-0.12452	0.17213	0.46943	cis		Yes	Not assessed
22:17204928:T:G	rs11704386	IL17RA_2992_59	COVID_A1	12	-0.353472	0.159724	0.0268959	0.543102	0.1973	0.0258	2.05264e-14	-0.20197	0.1504	0.179309	cis		Yes	Not assessed
22:17216052:T:C	rs5748950	IL17RA_2992_59	COVID_A1	12	-0.353472	0.159724	0.0268959	0.543102	-0.1653	0.0285	6.63149e-09	0.16912	0.17243	0.32669	cis		Yes	Not assessed
4:3494956:G:A	rs78770234	LRPAP1_3640_14	COVID_A1	20	0.468184	0.20105	0.0198752	0.543102	-0.6821	0.0688	3.60978e-23	-0.35825	0.376	0.340695	cis		Yes	Not assessed
6:29772569:A:G	rs73401939	LRPAP1_3640_14	COVID_A1	20	0.468184	0.20105	0.0198752	0.543102	1.4114	0.1694	7.96499e-17	0.7016	0.86401	0.416776	trans	ABCF1	Yes	Not assessed
6:29795193:C:T	rs56183732	LRPAP1_3640_14	COVID_A1	20	0.468184	0.20105	0.0198752	0.543102	0.4939	0.0835	3.31936e-09	0.0080026	0.52835	0.987915	trans	ZFP57	Yes	Not assessed
6:29984330:C:G	rs115313680	LRPAP1_3640_14	COVID_A1	20	0.468184	0.20105	0.0198752	0.543102	0.3428	0.057	1.80961e-09	0.28359	0.34482	0.410833	trans	RNF39	Yes	Not assessed
6:30006148:C:T	rs4313034	LRPAP1_3640_14	COVID_A1	20	0.468184	0.20105	0.0198752	0.543102	-0.1886	0.0318	3.0143e-09	-0.43007	0.19103	0.0243652	trans	HLA-A	Yes	Not assessed
6:30379141:T:C	rs7759025	LRPAP1_3640_14	COVID_A1	20	0.468184	0.20105	0.0198752	0.543102	0.3456	0.0559	6.31068e-10	0.27383	0.30754	0.373257	trans	HLA-G	Yes	Not assessed
6:30907020:C:T	rs6920760	LRPAP1_3640_14	COVID_A1	20	0.468184	0.20105	0.0198752	0.543102	0.1739	0.03	6.7646e-09	-0.0063806	0.246	0.979307	trans	DDR1	Yes	Not assessed
6:31302407:T:C	rs9468939	LRPAP1_3640_14	COVID_A1	20	0.468184	0.20105	0.0198752	0.543102	-0.2314	0.0301	1.49795e-14	0.080222	0.15122	0.595766	trans	HLA-C	Yes	Not assessed
6:31303917:C:T	rs9264872	LRPAP1_3640_14	COVID_A1	20	0.468184	0.20105	0.0198752	0.543102	0.469	0.0349	3.60162e-41	0.090893	0.2466	0.712437	trans	HLA-C	Yes	Not assessed
6:31355703:G:A	rs41555513	LRPAP1_3640_14	COVID_A1	20	0.468184	0.20105	0.0198752	0.543102	1.8123	0.0548	7.72131e-240	0.3206	0.55518	0.563622	trans	HLA-B	Yes	Not assessed
6:31379367:G:A	rs3094600	LRPAP1_3640_14	COVID_A1	20	0.468184	0.20105	0.0198752	0.543102	0.1718	0.0276	4.8267e-10	0.0070084	0.16285	0.965673	trans	MICB	Yes	Not assessed
6:31434606:A:G	rs55957433	LRPAP1_3640_14	COVID_A1	20	0.468184	0.20105	0.0198752	0.543102	0.2364	0.0308	1.65e-14	0.43478	0.17358	0.0122527	trans	AL645933.2	Yes	Not assessed
6:31472079:A:G	rs9267145	LRPAP1_3640_14	COVID_A1	20	0.468184	0.20105	0.0198752	0.543102	0.3339	0.0494	1.38843e-11	0.4102	0.25586	0.108886	trans	HCP5	Yes	Not assessed
6:31642607:C:T	rs1077394	LRPAP1_3640_14	COVID_A1	20	0.468184	0.20105	0.0198752	0.543102	-0.1986	0.0261	2.75807e-14	-0.17421	0.16008	0.276477	trans	BAG6	Yes	Not assessed
6:31842489:C:T	rs41284523	LRPAP1_3640_14	COVID_A1	20	0.468184	0.20105	0.0198752	0.543102	0.3564	0.0508	2.28722e-12	0.80852	0.45495	0.0755415	trans	SKIV2L	Yes	Not assessed
6:32229163:C:T	rs399950	LRPAP1_3640_14	COVID_A1	20	0.468184	0.20105	0.0198752	0.543102	0.2283	0.0323	1.57056e-12	0.56742	0.18164	0.00178488	trans	MICB	Yes	Not assessed
6:32321883:T:C	rs2022669	LRPAP1_3640_14	COVID_A1	20	0.468184	0.20105	0.0198752	0.543102	0.3483	0.0597	5.40587e-09	-0.19992	0.28651	0.485317	trans	HLA-DRB5	Yes	Not assessed
6:32458242:C:T	rs148242149	LRPAP1_3640_14	COVID_A1	20	0.468184	0.20105	0.0198752	0.543102	0.7147	0.0942	3.27274e-14	0.41484	0.35542	0.243137	trans	HLA-DRB5	Yes	Not assessed
6:32846882:A:G	rs4711312	LRPAP1_3640_14	COVID_A1	20	0.468184	0.20105	0.0198752	0.543102	0.2352	0.0358	5.03719e-11	-0.31737	0.19291	0.0999345	trans	PSMB8	Yes	Not assessed
6:33859299:C:G	rs73744710	LRPAP1_3640_14	COVID_A1	20	0.468184	0.20105	0.0198752	0.543102	0.8321	0.1296	1.35805e-10	-0.33741	0.86646	0.696971	trans	LINC01016	Yes	Not assessed
6:95431742:G:A	rs10498993	MANEA_8014_359	COVID_A1	13	-0.333123	0.144758	0.0213782	0.543102	-0.4467	0.0707	2.64548e-10	0.030219	0.47913	0.94971	cis		Yes	Not assessed
6:95435809:C:T	rs2716079	MANEA_8014_359	COVID_A1	13	-0.333123	0.144758	0.0213782	0.543102	-0.2772	0.0263	5.65446e-26	0.067602	0.14802	0.647881	cis		Yes	Not assessed
6:95560206:T:C	rs7748108	MANEA_8014_359	COVID_A1	13	-0.333123	0.144758	0.0213782	0.543102	-0.447	0.0277	1.39774e-58	0.20699	0.16401	0.206928	cis		Yes	Not assessed
6:95575816:T:A	rs13205922	MANEA_8014_359	COVID_A1	13	-0.333123	0.144758	0.0213782	0.543102	-1.7002	0.0345	0	0.56073	0.26211	0.032412	cis		Yes	Not assessed
6:95622045:G:A	rs7742378	MANEA_8014_359	COVID_A1	13	-0.333123	0.144758	0.0213782	0.543102	0.3309	0.0375	1.10442e-18	-0.22071	0.24913	0.375659	cis		Yes	Not assessed
6:95651257:T:C	rs6569257	MANEA_8014_359	COVID_A1	13	-0.333123	0.144758	0.0213782	0.543102	0.3455	0.0322	7.37447e-27	-0.13533	0.19279	0.482707	cis		Yes	Not assessed
6:95763994:T:G	rs12209462	MANEA_8014_359	COVID_A1	13	-0.333123	0.144758	0.0213782	0.543102	0.4237	0.0523	5.43578e-16	-0.14396	0.60763	0.812718	cis		Yes	Not assessed
6:95819740:C:G	rs79662282	MANEA_8014_359	COVID_A1	13	-0.333123	0.144758	0.0213782	0.543102	-0.3656	0.0486	5.36837e-14	-0.27331	0.26507	0.3025	cis		Yes	Not assessed
6:95853611:G:A	rs7754801	MANEA_8014_359	COVID_A1	13	-0.333123	0.144758	0.0213782	0.543102	0.1869	0.0289	9.9883e-11	0.14909	0.16382	0.362778	cis		Yes	Not assessed
6:95901651:A:G	rs80028478	MANEA_8014_359	COVID_A1	13	-0.333123	0.144758	0.0213782	0.543102	-0.5998	0.1081	2.88022e-08	0.61739	0.96658	0.522994	cis		Yes	Not assessed
6:95925799:T:C	rs652439	MANEA_8014_359	COVID_A1	13	-0.333123	0.144758	0.0213782	0.543102	0.3089	0.0548	1.73177e-08	0.10302	0.26567	0.698183	cis		Yes	Not assessed
6:95975550:G:C	rs637791	MANEA_8014_359	COVID_A1	13	-0.333123	0.144758	0.0213782	0.543102	0.2543	0.0359	1.40492e-12	-0.32928	0.19636	0.0935581	cis		Yes	Not assessed
6:96012859:G:A	rs9404128	MANEA_8014_359	COVID_A1	13	-0.333123	0.144758	0.0213782	0.543102	-0.2033	0.0258	3.27788e-15	0.12952	0.1512	0.391658	cis		Yes	Not assessed
3:46508307:G:T	rs11714743	TXNDC12_4815_25_3	COVID_A1	27	0.282121	0.129564	0.0294453	0.543102	0.1447	0.0253	1.06921e-08	-0.37977	0.22403	0.0900423	trans	CCR1	Yes	Not assessed
3:46621882:C:T	rs9817414	TXNDC12_4815_25_3	COVID_A1	27	0.282121	0.129564	0.0294453	0.543102	-0.1624	0.0286	1.36023e-08	-0.19358	0.16146	0.230553	trans	CCR1	Yes	Not assessed
3:46835174:C:G	rs56074871	TXNDC12_4815_25_3	COVID_A1	27	0.282121	0.129564	0.0294453	0.543102	-0.2188	0.0303	5.15603e-13	-0.087059	0.1941	0.653773	trans	SCAP	Yes	Not assessed
3:46886201:C:T	rs35163561	TXNDC12_4815_25_3	COVID_A1	27	0.282121	0.129564	0.0294453	0.543102	0.3914	0.0469	7.09638e-17	-0.45418	0.33255	0.172018	trans	TDGF1	Yes	Not assessed
3:47893519:G:A	rs75485436	TXNDC12_4815_25_3	COVID_A1	27	0.282121	0.129564	0.0294453	0.543102	0.9956	0.0954	1.69711e-25	0.65954	0.43033	0.125365	trans	ZNF589	Yes	Not assessed
3:47979792:C:T	rs34170328	TXNDC12_4815_25_3	COVID_A1	27	0.282121	0.129564	0.0294453	0.543102	0.2279	0.0261	2.50649e-18	0.14752	0.16319	0.366008	trans	MAP4	Yes	Not assessed
3:48084796:C:T	rs75072069	TXNDC12_4815_25_3	COVID_A1	27	0.282121	0.129564	0.0294453	0.543102	-0.4576	0.0677	1.38725e-11	1.0605	0.74074	0.152236	trans	ZNF589	Yes	Not assessed
3:48445644:C:A	rs730566	TXNDC12_4815_25_3	COVID_A1	27	0.282121	0.129564	0.0294453	0.543102	-0.3038	0.027	2.2678e-29	0.18466	0.18249	0.31159	trans	TREX1	Yes	Not assessed
3:48510399:G:C	rs7640031	TXNDC12_4815_25_3	COVID_A1	27	0.282121	0.129564	0.0294453	0.543102	0.7199	0.052	1.37849e-43	0.34049	0.28829	0.237576	trans	SHISA5	Yes	Not assessed
3:49274815:C:T	rs143756010	TXNDC12_4815_25_3	COVID_A1	27	0.282121	0.129564	0.0294453	0.543102	-0.392	0.0616	1.97032e-10	-0.53926	0.44654	0.227185	trans	AMT	Yes	Not assessed
3:49302574:A:T	rs11713251	TXNDC12_4815_25_3	COVID_A1	27	0.282121	0.129564	0.0294453	0.543102	-1.4098	0.0908	2.29817e-54	0.31306	1.0217	0.759292	trans	USP4	Yes	Not assessed
3:49406674:T:C	rs146140755	TXNDC12_4815_25_3	COVID_A1	27	0.282121	0.129564	0.0294453	0.543102	0.9441	0.1513	4.37793e-10	0.41667	0.79804	0.601589	trans	RHOA	Yes	Not assessed
3:49700521:G:A	rs35620248	TXNDC12_4815_25_3	COVID_A1	27	0.282121	0.129564	0.0294453	0.543102	-1.3421	0.0464	5.86286e-184	-0.41165	0.28394	0.14712	trans	RNF123	Yes	Not assessed
3:49712272:A:C	rs73077157	TXNDC12_4815_25_3	COVID_A1	27	0.282121	0.129564	0.0294453	0.543102	0.7965	0.0345	6.26096e-118	0.14116	0.19871	0.477467	trans	APEH	Yes	Not assessed
3:49840152:G:T	rs9858428	TXNDC12_4815_25_3	COVID_A1	27	0.282121	0.129564	0.0294453	0.543102	1.0768	0.0349	4.97086e-209	0.086805	0.26499	0.74323	trans	UBA7	Yes	Not assessed
3:50131279:C:T	rs150298538	TXNDC12_4815_25_3	COVID_A1	27	0.282121	0.129564	0.0294453	0.543102	1.0704	0.1357	3.07097e-15	-0.55928	0.93005	0.547611	trans	SEMA3F-AS1	Yes	Not assessed
3:50137453:T:C	rs2526388	TXNDC12_4815_25_3	COVID_A1	27	0.282121	0.129564	0.0294453	0.543102	0.3155	0.0274	1.11377e-30	0.0086282	0.18662	0.963124	trans	RBM6	Yes	Not assessed
3:50515725:A:G	rs35694819	TXNDC12_4815_25_3	COVID_A1	27	0.282121	0.129564	0.0294453	0.543102	-0.317	0.0283	4.01279e-29	-0.16952	0.16547	0.305611	trans	DOCK3	Yes	Not assessed
3:51352545:G:T	rs17051762	TXNDC12_4815_25_3	COVID_A1	27	0.282121	0.129564	0.0294453	0.543102	-0.3144	0.0415	3.56637e-14	-0.3233	0.25572	0.206132	trans	GRM2	Yes	Not assessed
3:51452483:C:T	rs148969828	TXNDC12_4815_25_3	COVID_A1	27	0.282121	0.129564	0.0294453	0.543102	0.9058	0.1625	2.48736e-08	0.3564	0.5787	0.537985	trans	DCAF1	Yes	Not assessed
3:51525051:T:C	rs138169353	TXNDC12_4815_25_3	COVID_A1	27	0.282121	0.129564	0.0294453	0.543102	-0.7653	0.0939	3.63444e-16	-0.96328	0.67208	0.151777	trans	GRM2	Yes	Not assessed
3:51812343:G:A	rs55886133	TXNDC12_4815_25_3	COVID_A1	27	0.282121	0.129564	0.0294453	0.543102	-0.6988	0.1032	1.27615e-11	-0.61908	0.79045	0.43351	trans	ABHD14A	Yes	Not assessed
3:51926762:C:T	rs11709277	TXNDC12_4815_25_3	COVID_A1	27	0.282121	0.129564	0.0294453	0.543102	-0.2567	0.0314	2.95475e-16	0.025852	0.27161	0.924171	trans	ABHD14B	Yes	Not assessed
3:52178645:G:C	rs3852070	TXNDC12_4815_25_3	COVID_A1	27	0.282121	0.129564	0.0294453	0.543102	0.1529	0.0254	1.74757e-09	-0.11103	0.18475	0.547857	trans	ALAS1	Yes	Not assessed
3:52504284:G:C	rs7613444	TXNDC12_4815_25_3	COVID_A1	27	0.282121	0.129564	0.0294453	0.543102	0.2959	0.0334	8.05318e-19	0.14422	0.19755	0.465364	trans	NT5DC2	Yes	Not assessed
3:52688546:T:C	rs35911561	TXNDC12_4815_25_3	COVID_A1	27	0.282121	0.129564	0.0294453	0.543102	-0.2499	0.0384	7.6253e-11	-0.094832	0.23822	0.690567	trans	GNL3	Yes	Not assessed
3:53004770:A:G	rs2581795	TXNDC12_4815_25_3	COVID_A1	27	0.282121	0.129564	0.0294453	0.543102	0.1894	0.0261	3.96633e-13	-0.02705	0.24252	0.91119	trans	SFMBT1	Yes	Not assessed
19:5759405:A:T	rs3097893	FUT3_4548_4	COVID_A2	17	-0.374828	0.17102	0.0284002	0.543102	0.2339	0.0325	6.15865e-13	-0.0094455	0.048853	0.846689	cis		Yes	Not assessed
19:5790861:C:T	rs185897394	FUT3_4548_4	COVID_A2	17	-0.374828	0.17102	0.0284002	0.543102	-1.055	0.1914	3.54745e-08	-0.14065	0.27686	0.61144	cis		Yes	Not assessed
19:5810373:G:A	rs6510858	FUT3_4548_4	COVID_A2	17	-0.374828	0.17102	0.0284002	0.543102	-0.1931	0.0313	6.85804e-10	-0.024241	0.044682	0.587458	cis		Yes	Not assessed
19:5819265:G:T	rs112398182	FUT3_4548_4	COVID_A2	17	-0.374828	0.17102	0.0284002	0.543102	-0.6905	0.0843	2.59098e-16	0.19074	0.097488	0.0504006	cis		Yes	Not assessed
19:5822697:C:G	rs2436519	FUT3_4548_4	COVID_A2	17	-0.374828	0.17102	0.0284002	0.543102	-0.286	0.0262	9.66271e-28	0.030059	0.027549	0.275224	cis		Yes	Not assessed
19:5838649:G:T	rs147625395	FUT3_4548_4	COVID_A2	17	-0.374828	0.17102	0.0284002	0.543102	-0.7873	0.096	2.38313e-16	0.12403	0.11251	0.270292	cis		Yes	Not assessed
19:5839928:C:T	rs112358826	FUT3_4548_4	COVID_A2	17	-0.374828	0.17102	0.0284002	0.543102	-0.8036	0.1156	3.61276e-12	-0.16668	0.16226	0.304307	cis		Yes	Not assessed
19:5840608:C:T	rs708686	FUT3_4548_4	COVID_A2	17	-0.374828	0.17102	0.0284002	0.543102	-0.853	0.0242	3.69035e-272	0.10025	0.038439	0.00910654	cis		Yes	Not assessed
19:5842308:T:A	rs28381972	FUT3_4548_4	COVID_A2	17	-0.374828	0.17102	0.0284002	0.543102	0.3012	0.0465	9.33046e-11	-0.032928	0.065923	0.617433	cis		Yes	Not assessed
19:5844332:C:T	rs3745635	FUT3_4548_4	COVID_A2	17	-0.374828	0.17102	0.0284002	0.543102	-0.7087	0.0944	6.03062e-14	-0.16217	0.10123	0.109157	cis		Yes	Not assessed
19:5852910:G:A	rs28742583	FUT3_4548_4	COVID_A2	17	-0.374828	0.17102	0.0284002	0.543102	-0.6555	0.0754	3.51027e-18	0.27153	0.14143	0.0548718	cis		Yes	Not assessed
19:5856563:C:T	rs708687	FUT3_4548_4	COVID_A2	17	-0.374828	0.17102	0.0284002	0.543102	-0.2941	0.033	5.00654e-19	-0.065108	0.04718	0.167589	cis		Yes	Not assessed
19:5856726:C:G	rs112707843	FUT3_4548_4	COVID_A2	17	-0.374828	0.17102	0.0284002	0.543102	0.2369	0.0404	4.52225e-09	-0.10434	0.061658	0.0906006	cis		Yes	Not assessed
19:5860366:C:G	rs74174349	FUT3_4548_4	COVID_A2	17	-0.374828	0.17102	0.0284002	0.543102	0.5586	0.0963	6.6069e-09	0.11034	0.1195	0.355826	cis		Yes	Not assessed
19:5867902:G:A	rs778972	FUT3_4548_4	COVID_A2	17	-0.374828	0.17102	0.0284002	0.543102	0.1769	0.0296	2.28191e-09	-0.077281	0.043401	0.0749734	cis		Yes	Not assessed
19:5990944:T:C	rs8108685	FUT3_4548_4	COVID_A2	17	-0.374828	0.17102	0.0284002	0.543102	-0.3544	0.0594	2.42649e-09	0.035131	0.098473	0.721273	cis		Yes	Not assessed
19:48702851:C:G	rs679574	FUT3_4548_4	COVID_D1	17	-0.374828	0.17102	0.0284002	0.543102	-0.1994	0.0243	2.29134e-16	-0.0031819	0.026579	0.904709	trans	FUT2	Yes	Not assessed
19:5759405:A:T	rs3097893	FUT3_4548_4	COVID_D1	17	-0.374828	0.17102	0.0284002	0.543102	0.2339	0.0325	6.15865e-13	-0.019047	0.039002	0.625295	cis		Yes	Not assessed
19:5790861:C:T	rs185897394	FUT3_4548_4	COVID_D1	17	-0.374828	0.17102	0.0284002	0.543102	-1.055	0.1914	3.54745e-08	-0.15894	0.16948	0.348342	cis		Yes	Not assessed
19:5810373:G:A	rs6510858	FUT3_4548_4	COVID_D1	17	-0.374828	0.17102	0.0284002	0.543102	-0.1931	0.0313	6.85804e-10	0.036834	0.039313	0.348788	cis		Yes	Not assessed
19:5817525:G:T	rs146715395	FUT3_4548_4	COVID_D1	17	-0.374828	0.17102	0.0284002	0.543102	-0.6874	0.0839	2.5461e-16	0.026928	0.14863	0.85623	cis		Yes	Not assessed
19:5822697:C:G	rs2436519	FUT3_4548_4	COVID_D1	17	-0.374828	0.17102	0.0284002	0.543102	-0.286	0.0262	9.66271e-28	-0.072203	0.02696	0.00740294	cis		Yes	Not assessed
19:5838649:G:T	rs147625395	FUT3_4548_4	COVID_D1	17	-0.374828	0.17102	0.0284002	0.543102	-0.7873	0.096	2.38313e-16	-0.17212	0.12841	0.180117	cis		Yes	Not assessed
19:5839928:C:T	rs112358826	FUT3_4548_4	COVID_D1	17	-0.374828	0.17102	0.0284002	0.543102	-0.8036	0.1156	3.61276e-12	0.1532	0.14352	0.28577	cis		Yes	Not assessed
19:5840608:C:T	rs708686	FUT3_4548_4	COVID_D1	17	-0.374828	0.17102	0.0284002	0.543102	-0.853	0.0242	3.69035e-272	-0.055403	0.029693	0.0620609	cis		Yes	Not assessed
19:5842308:T:A	rs28381972	FUT3_4548_4	COVID_D1	17	-0.374828	0.17102	0.0284002	0.543102	0.3012	0.0465	9.33046e-11	0.039453	0.065978	0.549859	cis		Yes	Not assessed
19:5844332:C:T	rs3745635	FUT3_4548_4	COVID_D1	17	-0.374828	0.17102	0.0284002	0.543102	-0.7087	0.0944	6.03062e-14	-0.10969	0.13265	0.408286	cis		Yes	Not assessed
19:5852910:G:A	rs28742583	FUT3_4548_4	COVID_D1	17	-0.374828	0.17102	0.0284002	0.543102	-0.6555	0.0754	3.51027e-18	-0.04078	0.13865	0.768665	cis		Yes	Not assessed
19:5856563:C:T	rs708687	FUT3_4548_4	COVID_D1	17	-0.374828	0.17102	0.0284002	0.543102	-0.2941	0.033	5.00654e-19	-0.051654	0.039603	0.192133	cis		Yes	Not assessed
19:5856726:C:G	rs112707843	FUT3_4548_4	COVID_D1	17	-0.374828	0.17102	0.0284002	0.543102	0.2369	0.0404	4.52225e-09	-0.050622	0.050175	0.313018	cis		Yes	Not assessed
19:5860366:C:G	rs74174349	FUT3_4548_4	COVID_D1	17	-0.374828	0.17102	0.0284002	0.543102	0.5586	0.0963	6.6069e-09	0.13985	0.11244	0.213583	cis		Yes	Not assessed
19:5867902:G:A	rs778972	FUT3_4548_4	COVID_D1	17	-0.374828	0.17102	0.0284002	0.543102	0.1769	0.0296	2.28191e-09	0.01926	0.031309	0.53845	cis		Yes	Not assessed
19:5990944:T:C	rs8108685	FUT3_4548_4	COVID_D1	17	-0.374828	0.17102	0.0284002	0.543102	-0.3544	0.0594	2.42649e-09	-0.014774	0.083223	0.859098	cis		Yes	Not assessed
6:29965662:C:T	rs2844806	HLA_DQA2_7757_5	COVID_A1	13	0.532707	0.250024	0.0331204	0.549799	-0.1512	0.0249	1.261e-09	-0.014918	0.14494	0.918022	trans	HLA-G	Yes	Not assessed
6:31034750:A:G	rs4248153	HLA_DQA2_7757_5	COVID_A1	13	0.532707	0.250024	0.0331204	0.549799	0.186	0.0256	3.71317e-13	-0.0081429	0.14287	0.954549	trans	MUC22	Yes	Not assessed
6:31303734:A:C	rs13200571	HLA_DQA2_7757_5	COVID_A1	13	0.532707	0.250024	0.0331204	0.549799	-0.2315	0.0333	3.60266e-12	0.20209	0.19678	0.304428	trans	MICB	Yes	Not assessed
6:31347562:C:T	rs9265954	HLA_DQA2_7757_5	COVID_A1	13	0.532707	0.250024	0.0331204	0.549799	-0.2855	0.0351	4.15685e-16	-0.88034	0.39686	0.0265369	trans	MICB	Yes	Not assessed
6:32592757:A:T	rs11756836	HLA_DQA2_7757_5	COVID_A1	13	0.532707	0.250024	0.0331204	0.549799	0.3157	0.0486	8.25468e-11	0.4686	0.3296	0.155107	cis		Yes	Not assessed
6:32616142:T:C	rs33964890	HLA_DQA2_7757_5	COVID_A1	13	0.532707	0.250024	0.0331204	0.549799	0.2165	0.0271	1.36115e-15	-0.18973	0.18261	0.298809	cis		Yes	Not assessed
6:32622382:C:A	rs9271547	HLA_DQA2_7757_5	COVID_A1	13	0.532707	0.250024	0.0331204	0.549799	0.4488	0.0237	5.6841e-80	0.54606	0.17903	0.00228763	cis		Yes	Not assessed
6:32624057:G:T	rs34106969	HLA_DQA2_7757_5	COVID_A1	13	0.532707	0.250024	0.0331204	0.549799	0.2717	0.0333	3.37365e-16	0.43483	0.19746	0.0276571	cis		Yes	Not assessed
6:32644337:A:G	rs9273060	HLA_DQA2_7757_5	COVID_A1	13	0.532707	0.250024	0.0331204	0.549799	-0.4752	0.0275	6.6548e-67	-0.30247	0.19494	0.120757	cis		Yes	Not assessed
6:32674706:A:C	rs1794484	HLA_DQA2_7757_5	COVID_A1	13	0.532707	0.250024	0.0331204	0.549799	0.3093	0.0485	1.80214e-10	-0.556	0.32203	0.084249	cis		Yes	Not assessed
6:32714451:G:A	rs2894381	HLA_DQA2_7757_5	COVID_A1	13	0.532707	0.250024	0.0331204	0.549799	-0.2652	0.0302	1.61371e-18	-0.062923	0.17396	0.717569	cis		Yes	Not assessed
6:32782483:T:A	rs113936637	HLA_DQA2_7757_5	COVID_A1	13	0.532707	0.250024	0.0331204	0.549799	0.3257	0.0515	2.54429e-10	0.52052	0.27764	0.06082	cis		Yes	Not assessed
6:33054998:C:T	rs3097665	HLA_DQA2_7757_5	COVID_A1	13	0.532707	0.250024	0.0331204	0.549799	0.1639	0.0299	4.21484e-08	0.28107	0.23185	0.2254	cis		Yes	Not assessed
13:91779864:C:T	rs72644019	GPC5_4991_12	COVID_A1	11	-0.466577	0.230682	0.0431151	0.614423	-0.8449	0.1371	7.15353e-10	0.3803	0.70213	0.588068	cis		No	Not a missense variant or in LD with missense variants
1:196615191:A:G	rs4657825	CFB_4129	COVID_A1	10	-0.539378	0.27329	0.048422	0.614423	-0.2795	0.029	5.52911e-22	0.32491	0.16686	0.0515106	trans	CFH	Yes	Not assessed
6:31462624:G:A	rs16899661	CFB_4129	COVID_A1	10	-0.539378	0.27329	0.048422	0.614423	-0.3963	0.0625	2.28575e-10	0.72584	0.41243	0.0784229	cis		Yes	Not assessed
6:31495351:G:A	rs9267352	CFB_4129	COVID_A1	10	-0.539378	0.27329	0.048422	0.614423	0.1573	0.028	1.9334e-08	0.15481	0.16603	0.351119	cis		Yes	Not assessed
6:31941563:G:A	rs9332741	CFB_4129	COVID_A1	10	-0.539378	0.27329	0.048422	0.614423	-0.9131	0.0596	5.58126e-53	0.31998	0.38719	0.408568	cis		Yes	Not assessed
6:31943152:G:A	rs2242572	CFB_4129	COVID_A1	10	-0.539378	0.27329	0.048422	0.614423	0.3614	0.0417	4.44955e-18	0.36021	0.28934	0.213155	cis		Yes	Not assessed
6:31956550:G:A	rs9501161	CFB_4129	COVID_A1	10	-0.539378	0.27329	0.048422	0.614423	-0.2949	0.0435	1.20751e-11	0.19483	0.2111	0.356045	cis		Yes	Not assessed
6:32159700:C:A	rs3134950	CFB_4129	COVID_A1	10	-0.539378	0.27329	0.048422	0.614423	0.2056	0.0252	3.38565e-16	-0.30068	0.15333	0.0498791	cis		Yes	Not assessed
6:32465869:C:T	rs41291802	CFB_4129	COVID_A1	10	-0.539378	0.27329	0.048422	0.614423	0.2096	0.0351	2.35068e-09	-0.29877	0.25996	0.250436	cis		Yes	Not assessed
6:32617275:C:A	rs13213778	CFB_4129	COVID_A1	10	-0.539378	0.27329	0.048422	0.614423	-0.4224	0.0708	2.42989e-09	0.27662	0.46105	0.548521	cis		Yes	Not assessed
6:32624068:G:A	rs9271622	CFB_4129	COVID_A1	10	-0.539378	0.27329	0.048422	0.614423	0.189	0.0327	7.47821e-09	-0.1179	0.1773	0.506067	cis		Yes	Not assessed
13:91366901:A:G	rs8001781	GPC5_4991_12	COVID_A1	11	-0.466577	0.230682	0.0431151	0.614423	-0.2325	0.0261	5.19399e-19	0.071779	0.15328	0.63958	cis		Yes	Not assessed
13:91440344:G:A	rs11840977	GPC5_4991_12	COVID_A1	11	-0.466577	0.230682	0.0431151	0.614423	-0.1613	0.0251	1.30752e-10	0.18548	0.14919	0.213777	cis		Yes	Not assessed
13:91442213:G:C	rs75181099	GPC5_4991_12	COVID_A1	11	-0.466577	0.230682	0.0431151	0.614423	0.5793	0.0997	6.23121e-09	0.13154	0.48544	0.786414	cis		Yes	Not assessed
13:91591211:T:A	rs9523369	GPC5_4991_12	COVID_A1	11	-0.466577	0.230682	0.0431151	0.614423	0.2035	0.0343	2.97549e-09	-0.24635	0.22785	0.279611	cis		Yes	Not assessed
13:91678443:C:T	rs163728	GPC5_4991_12	COVID_A1	11	-0.466577	0.230682	0.0431151	0.614423	-0.2337	0.0293	1.51018e-15	0.20549	0.16758	0.220116	cis		Yes	Not assessed
13:91747310:T:C	rs17425635	GPC5_4991_12	COVID_A1	11	-0.466577	0.230682	0.0431151	0.614423	0.2872	0.0428	1.94251e-11	0.091202	0.28943	0.752679	cis		Yes	Not assessed
13:91770692:G:T	rs342702	GPC5_4991_12	COVID_A1	11	-0.466577	0.230682	0.0431151	0.614423	-0.8042	0.0247	1.57672e-232	0.26848	0.23178	0.246725	cis		Yes	Not assessed
13:91904580:T:A	rs9556131	GPC5_4991_12	COVID_A1	11	-0.466577	0.230682	0.0431151	0.614423	-0.3105	0.0406	2.04473e-14	0.42779	0.20762	0.0393558	cis		Yes	Not assessed
13:91922633:G:A	rs79136110	GPC5_4991_12	COVID_A1	11	-0.466577	0.230682	0.0431151	0.614423	-0.507	0.0906	2.1932e-08	-0.50712	0.65257	0.437093	cis		Yes	Not assessed
13:92058636:C:A	rs57609994	GPC5_4991_12	COVID_A1	11	-0.466577	0.230682	0.0431151	0.614423	0.286	0.0357	1.1359e-15	-0.29263	0.20618	0.155813	cis		Yes	Not assessed
19:8302274:C:T	rs9426	TCN2_5584_21_3	COVID_A1	21	-0.300702	0.153037	0.0494271	0.614423	0.6251	0.0683	5.57499e-20	0.23355	0.42515	0.582775	trans	CD320	Yes	Not assessed
19:8319345:A:G	rs3097182	TCN2_5584_21_3	COVID_A1	21	-0.300702	0.153037	0.0494271	0.614423	0.1658	0.0272	1.09036e-09	0.20613	0.15039	0.170488	trans	NDUFA7	Yes	Not assessed
22:29919747:T:C	rs245008	TCN2_5584_21_3	COVID_A1	21	-0.300702	0.153037	0.0494271	0.614423	0.1469	0.0246	2.35018e-09	-0.35337	0.16197	0.0291317	cis		Yes	Not assessed
22:30212155:C:T	rs9614165	TCN2_5584_21_3	COVID_A1	21	-0.300702	0.153037	0.0494271	0.614423	0.1851	0.0292	2.312e-10	-0.22421	0.18786	0.232676	cis		Yes	Not assessed
22:30397148:G:A	rs757660	TCN2_5584_21_3	COVID_A1	21	-0.300702	0.153037	0.0494271	0.614423	-0.1903	0.0271	2.18495e-12	-0.091675	0.16947	0.588541	cis		Yes	Not assessed
22:30499995:A:G	rs5749113	TCN2_5584_21_3	COVID_A1	21	-0.300702	0.153037	0.0494271	0.614423	-0.2515	0.0252	1.86169e-23	0.12354	0.15015	0.410635	cis		Yes	Not assessed
22:30568916:A:G	rs2528456	TCN2_5584_21_3	COVID_A1	21	-0.300702	0.153037	0.0494271	0.614423	0.6923	0.0791	2.0921e-18	-0.6798	0.49287	0.167812	cis		Yes	Not assessed
22:30592775:C:T	rs12484511	TCN2_5584_21_3	COVID_A1	21	-0.300702	0.153037	0.0494271	0.614423	-0.7378	0.0406	8.53593e-74	0.078111	0.24639	0.751227	cis		Yes	Not assessed
22:30608841:C:G	rs5997702	TCN2_5584_21_3	COVID_A1	21	-0.300702	0.153037	0.0494271	0.614423	0.846	0.0683	3.09132e-35	-0.36972	0.43374	0.393992	cis		Yes	Not assessed
22:30609001:G:A	rs117324970	TCN2_5584_21_3	COVID_A1	21	-0.300702	0.153037	0.0494271	0.614423	0.627	0.0697	2.3474e-19	0.36077	0.42717	0.398357	cis		Yes	Not assessed
22:30616769:T:C	rs4820885	TCN2_5584_21_3	COVID_A1	21	-0.300702	0.153037	0.0494271	0.614423	-0.7247	0.0212	4.18599e-256	0.47551	0.1504	0.00156886	cis		Yes	Not assessed
22:30628566:C:G	rs9621051	TCN2_5584_21_3	COVID_A1	21	-0.300702	0.153037	0.0494271	0.614423	-0.7247	0.0558	1.44141e-38	-0.14177	0.30714	0.644382	cis		Yes	Not assessed
22:30633059:A:G	rs138426988	TCN2_5584_21_3	COVID_A1	21	-0.300702	0.153037	0.0494271	0.614423	0.647	0.0651	2.82898e-23	-0.18622	0.38171	0.625651	cis		Yes	Not assessed
22:30643746:G:A	rs76738533	TCN2_5584_21_3	COVID_A1	21	-0.300702	0.153037	0.0494271	0.614423	-0.9041	0.083	1.24785e-27	-0.39417	0.39148	0.313997	cis		Yes	Not assessed
22:30648478:G:A	rs9609030	TCN2_5584_21_3	COVID_A1	21	-0.300702	0.153037	0.0494271	0.614423	0.8981	0.0788	4.31743e-30	-0.78571	0.6658	0.237961	cis		Yes	Not assessed
22:30678107:G:C	rs8138379	TCN2_5584_21_3	COVID_A1	21	-0.300702	0.153037	0.0494271	0.614423	0.2865	0.0253	9.96854e-30	-0.17674	0.14897	0.235459	cis		Yes	Not assessed
22:30698401:T:C	rs112890161	TCN2_5584_21_3	COVID_A1	21	-0.300702	0.153037	0.0494271	0.614423	-0.5366	0.0848	2.48633e-10	0.1257	0.40888	0.75852	cis		Yes	Not assessed
22:30741525:G:A	rs73154638	TCN2_5584_21_3	COVID_A1	21	-0.300702	0.153037	0.0494271	0.614423	0.3717	0.0676	3.82991e-08	-0.50821	0.43553	0.24326	cis		Yes	Not assessed
22:30871681:TAGG:T	rs79532894	TCN2_5584_21_3	COVID_A1	21	-0.300702	0.153037	0.0494271	0.614423	-0.2059	0.0302	9.23933e-12	0.21406	0.21947	0.329387	cis		Yes	Not assessed
22:30875563:C:G	rs5997798	TCN2_5584_21_3	COVID_A1	21	-0.300702	0.153037	0.0494271	0.614423	0.1538	0.0263	4.97791e-09	-0.21101	0.15886	0.184087	cis		Yes	Not assessed
3:68300562:G:A	rs73099617	TCN2_5584_21_3	COVID_A1	21	-0.300702	0.153037	0.0494271	0.614423	-0.264	0.0476	2.91914e-08	0.023692	0.25264	0.925286	trans	FAM19A1	Yes	Not assessed
8:27951253:C:T	rs4395853	POFUT2_6042_52_3	COVID_C2	10	0.0401526	0.0199305	0.0439432	0.618585	-0.2583	0.0272	2.17431e-21	-0.036858	0.014826	0.0129174	trans	SCARA5	Yes	Not assessed
9:114960934:C:T	rs73567432	POFUT2_6042_52_3	COVID_C2	10	0.0401526	0.0199305	0.0439432	0.618585	-0.4002	0.0521	1.57381e-14	0.00029694	0.028536	0.991698	trans	TNFSF8	Yes	Not assessed
9:115017216:G:A	rs12555300	POFUT2_6042_52_3	COVID_C2	10	0.0401526	0.0199305	0.0439432	0.618585	0.2664	0.0449	2.97114e-09	0.013342	0.023046	0.562637	trans	TNFSF8	Yes	Not assessed
9:115028646:A:C	rs34810955	POFUT2_6042_52_3	COVID_C2	10	0.0401526	0.0199305	0.0439432	0.618585	0.2043	0.0313	6.703e-11	-0.0013803	0.018097	0.939202	trans	TNC	Yes	Not assessed
9:115073620:C:T	rs1138545	POFUT2_6042_52_3	COVID_C2	10	0.0401526	0.0199305	0.0439432	0.618585	-0.806	0.0313	3.15771e-146	-0.020188	0.018203	0.267409	trans	TNC	Yes	Not assessed
9:115096638:A:G	rs142514071	POFUT2_6042_52_3	COVID_C2	10	0.0401526	0.0199305	0.0439432	0.618585	-0.806	0.1303	6.18176e-10	-0.078293	0.087136	0.368911	trans	TNC	Yes	Not assessed
9:115103976:A:G	rs541723783	POFUT2_6042_52_3	COVID_C2	10	0.0401526	0.0199305	0.0439432	0.618585	-0.6122	0.0847	4.90653e-13	-0.020134	0.062747	0.748304	trans	TNC	Yes	Not assessed
9:115158816:C:T	rs6478137	POFUT2_6042_52_3	COVID_C2	10	0.0401526	0.0199305	0.0439432	0.618585	0.2405	0.0327	1.91299e-13	0.0087784	0.015817	0.578896	trans	2001-12-01	Yes	Not assessed
9:115208380:T:G	rs1335354	POFUT2_6042_52_3	COVID_C2	10	0.0401526	0.0199305	0.0439432	0.618585	-0.227	0.0276	1.95782e-16	-0.0048597	0.014432	0.73632	trans	2001-12-01	Yes	Not assessed
9:115314255:A:T	rs2157660	POFUT2_6042_52_3	COVID_C2	10	0.0401526	0.0199305	0.0439432	0.618585	0.1456	0.0266	4.40774e-08	0.019757	0.014664	0.177879	trans	AL355601.1	Yes	Not assessed
1:161438667:TTAAG:T	rs541041100	FCGR2B_3310	COVID_C1	32	0.0330844	0.0158067	0.0363441	0.630874	1.1658	0.1799	9.15606e-11	-0.23479	0.22268	0.291708	cis		No	Not a missense variant or in LD with missense variants
1:161626660:A:C	rs573255358	FCGR2B_3310	COVID_C1	32	0.0330844	0.0158067	0.0363441	0.630874	1.1863	0.1401	2.50666e-17	0.35871	0.13059	0.00601723	cis		No	Not a missense variant or in LD with missense variants
1:161676336:C:T	rs112305056	FCGR2B_3310	COVID_C1	32	0.0330844	0.0158067	0.0363441	0.630874	1.0296	0.1542	2.43812e-11	0.032292	0.17299	0.85192	cis		No	Not a missense variant or in LD with missense variants
1:161438667:TTAAG:T	rs541041100	FCGR2B_3310	COVID_C2	32	0.0330844	0.0158067	0.0363441	0.630874	1.1658	0.1799	9.15606e-11	-0.39818	0.18043	0.0273253	cis		No	Not a missense variant or in LD with missense variants
1:161626660:A:C	rs573255358	FCGR2B_3310	COVID_C2	32	0.0330844	0.0158067	0.0363441	0.630874	1.1863	0.1401	2.50666e-17	0.25542	0.11175	0.0222755	cis		No	Not a missense variant or in LD with missense variants
1:161676336:C:T	rs112305056	FCGR2B_3310	COVID_C2	32	0.0330844	0.0158067	0.0363441	0.630874	1.0296	0.1542	2.43812e-11	-0.044008	0.1504	0.769823	cis		No	Not a missense variant or in LD with missense variants
1:161240743:C:T	rs186663604	FCGR2B_3310	COVID_C1	32	0.0330844	0.0158067	0.0363441	0.630874	0.4306	0.0662	7.79358e-11	-0.0013277	0.052752	0.97992	cis		Yes	Not assessed
1:161287569:G:A	rs6656438	FCGR2B_3310	COVID_C1	32	0.0330844	0.0158067	0.0363441	0.630874	0.2244	0.0394	1.2306e-08	-0.014435	0.027373	0.597954	cis		Yes	Not assessed
1:161305681:C:A	rs150182811	FCGR2B_3310	COVID_C1	32	0.0330844	0.0158067	0.0363441	0.630874	0.6603	0.1115	3.18102e-09	0.097115	0.095432	0.308851	cis		Yes	Not assessed
1:161339449:C:T	rs115605940	FCGR2B_3310	COVID_C1	32	0.0330844	0.0158067	0.0363441	0.630874	-0.4106	0.0646	2.07025e-10	0.00030448	0.042841	0.994329	cis		Yes	Not assessed
1:161362517:G:C	rs201210474	FCGR2B_3310	COVID_C1	32	0.0330844	0.0158067	0.0363441	0.630874	-0.6315	0.1047	1.62426e-09	-0.043309	0.10215	0.671584	cis		Yes	Not assessed
1:161405420:G:C	rs112252354	FCGR2B_3310	COVID_C1	32	0.0330844	0.0158067	0.0363441	0.630874	-0.377	0.0616	9.34991e-10	0.0025695	0.045734	0.955196	cis		Yes	Not assessed
1:161419170:T:C	rs4326638	FCGR2B_3310	COVID_C1	32	0.0330844	0.0158067	0.0363441	0.630874	-0.3704	0.0243	1.83826e-52	-0.027246	0.015609	0.0808924	cis		Yes	Not assessed
1:161440388:C:A	rs180854462	FCGR2B_3310	COVID_C1	32	0.0330844	0.0158067	0.0363441	0.630874	-0.3869	0.0635	1.10874e-09	-0.14086	0.082919	0.0893632	cis		Yes	Not assessed
1:161494119:G:A	rs150629305	FCGR2B_3310	COVID_C1	32	0.0330844	0.0158067	0.0363441	0.630874	-0.8272	0.1299	1.9154e-10	-0.10162	0.13631	0.455966	cis		Yes	Not assessed
1:161498640:C:T	rs114797774	FCGR2B_3310	COVID_C1	32	0.0330844	0.0158067	0.0363441	0.630874	0.9165	0.0876	1.28654e-25	-0.054651	0.067019	0.414812	cis		Yes	Not assessed
1:161502999:C:A	rs10800314	FCGR2B_3310	COVID_C1	32	0.0330844	0.0158067	0.0363441	0.630874	0.6669	0.0238	9.01374e-173	0.054058	0.030147	0.0729494	cis		Yes	Not assessed
1:161505324:C:G	rs72717028	FCGR2B_3310	COVID_C1	32	0.0330844	0.0158067	0.0363441	0.630874	-0.6113	0.1046	5.09105e-09	0.025477	0.074066	0.730864	cis		Yes	Not assessed
1:161511740:G:A	rs113590334	FCGR2B_3310	COVID_C1	32	0.0330844	0.0158067	0.0363441	0.630874	-0.3988	0.0619	1.17406e-10	-0.03377	0.043282	0.435254	cis		Yes	Not assessed
1:161532142:G:A	rs115264949	FCGR2B_3310	COVID_C1	32	0.0330844	0.0158067	0.0363441	0.630874	1.1332	0.098	6.32568e-31	0.062824	0.072485	0.386097	cis		Yes	Not assessed
1:161544666:C:T	rs144672514	FCGR2B_3310	COVID_C1	32	0.0330844	0.0158067	0.0363441	0.630874	1.0232	0.1016	7.43207e-24	0.031684	0.086345	0.713659	cis		Yes	Not assessed
1:161594602:T:C	rs115987345	FCGR2B_3310	COVID_C1	32	0.0330844	0.0158067	0.0363441	0.630874	0.9993	0.1203	9.83728e-17	-0.061496	0.12977	0.635582	cis		Yes	Not assessed
1:161595618:T:C	rs114010589	FCGR2B_3310	COVID_C1	32	0.0330844	0.0158067	0.0363441	0.630874	-0.4023	0.0466	5.97388e-18	-0.038144	0.03539	0.281115	cis		Yes	Not assessed
1:161599779:C:T	rs138731942	FCGR2B_3310	COVID_C1	32	0.0330844	0.0158067	0.0363441	0.630874	-0.3368	0.0356	3.05964e-21	-0.012328	0.039704	0.756183	cis		Yes	Not assessed
1:161653235:G:C	rs61804164	FCGR2B_3310	COVID_C1	32	0.0330844	0.0158067	0.0363441	0.630874	-0.455	0.0371	1.41083e-34	0.015565	0.033367	0.640873	cis		Yes	Not assessed
1:161671594:G:A	rs6665610	FCGR2B_3310	COVID_C1	32	0.0330844	0.0158067	0.0363441	0.630874	1.3308	0.0224	0	0.029505	0.023481	0.208917	cis		Yes	Not assessed
1:161682517:C:T	rs111528110	FCGR2B_3310	COVID_C1	32	0.0330844	0.0158067	0.0363441	0.630874	0.8011	0.0627	2.21219e-37	0.027841	0.033113	0.400467	cis		Yes	Not assessed
1:161683325:C:T	rs141350127	FCGR2B_3310	COVID_C1	32	0.0330844	0.0158067	0.0363441	0.630874	1.2534	0.1353	1.97176e-20	0.014394	0.13085	0.912406	cis		Yes	Not assessed
1:161689950:T:C	rs148824583	FCGR2B_3310	COVID_C1	32	0.0330844	0.0158067	0.0363441	0.630874	-0.6665	0.076	1.79084e-18	-0.037838	0.058559	0.518181	cis		Yes	Not assessed
1:161692882:A:C	rs114883413	FCGR2B_3310	COVID_C1	32	0.0330844	0.0158067	0.0363441	0.630874	1.06	0.105	5.79902e-24	0.041654	0.12076	0.730145	cis		Yes	Not assessed
1:161710468:G:A	rs6427618	FCGR2B_3310	COVID_C1	32	0.0330844	0.0158067	0.0363441	0.630874	0.1814	0.0254	9.2162e-13	-0.0054452	0.015879	0.73166	cis		Yes	Not assessed
1:161724126:A:G	rs6696500	FCGR2B_3310	COVID_C1	32	0.0330844	0.0158067	0.0363441	0.630874	0.4261	0.038	3.51427e-29	0.015931	0.022961	0.48779	cis		Yes	Not assessed
1:161744943:G:T	rs115291212	FCGR2B_3310	COVID_C1	32	0.0330844	0.0158067	0.0363441	0.630874	-0.436	0.0554	3.54539e-15	-0.08649	0.036529	0.0178987	cis		Yes	Not assessed
1:161972701:C:G	rs4656342	FCGR2B_3310	COVID_C1	32	0.0330844	0.0158067	0.0363441	0.630874	0.2535	0.0286	7.74461e-19	0.0038662	0.018207	0.831836	cis		Yes	Not assessed
1:161985985:G:A	rs10918374	FCGR2B_3310	COVID_C1	32	0.0330844	0.0158067	0.0363441	0.630874	0.2814	0.0288	1.50211e-22	-9.2144e-05	0.018104	0.995939	cis		Yes	Not assessed
19:42941893:G:A	rs11670711	PSG4_5649_83_3	COVID_C1	14	0.0596589	0.0279857	0.0330265	0.630874	0.2517	0.0417	1.58009e-09	0.00087873	0.023801	0.970549	cis		Yes	Not assessed
19:43025992:C:T	rs117268538	PSG4_5649_83_3	COVID_C1	14	0.0596589	0.0279857	0.0330265	0.630874	-0.3804	0.0582	6.31511e-11	-0.035443	0.053514	0.507771	cis		Yes	Not assessed
19:43043234:G:A	rs13346186	PSG4_5649_83_3	COVID_C1	14	0.0596589	0.0279857	0.0330265	0.630874	0.5462	0.0834	5.78614e-11	-0.059695	0.066529	0.369571	cis		Yes	Not assessed
19:43058394:G:A	rs4530265	PSG4_5649_83_3	COVID_C1	14	0.0596589	0.0279857	0.0330265	0.630874	-0.312	0.0475	5.08516e-11	0.037723	0.041577	0.364246	cis		Yes	Not assessed
19:43063301:C:T	rs34408465	PSG4_5649_83_3	COVID_C1	14	0.0596589	0.0279857	0.0330265	0.630874	0.6527	0.0859	2.99883e-14	0.05877	0.075244	0.434768	cis		Yes	Not assessed
19:43078592:C:T	rs143071276	PSG4_5649_83_3	COVID_C1	14	0.0596589	0.0279857	0.0330265	0.630874	0.5802	0.1037	2.2064e-08	0.2271	0.083725	0.00667876	cis		Yes	Not assessed
19:43123699:T:C	rs2214611	PSG4_5649_83_3	COVID_C1	14	0.0596589	0.0279857	0.0330265	0.630874	0.1801	0.029	5.28685e-10	0.0028687	0.021182	0.892271	cis		Yes	Not assessed
19:43132267:A:G	rs138707456	PSG4_5649_83_3	COVID_C1	14	0.0596589	0.0279857	0.0330265	0.630874	-0.3162	0.0393	8.56828e-16	0.021315	0.047858	0.656045	cis		Yes	Not assessed
19:43167474:T:A	rs148141213	PSG4_5649_83_3	COVID_C1	14	0.0596589	0.0279857	0.0330265	0.630874	0.4753	0.0778	1.00098e-09	0.020746	0.069344	0.764806	cis		Yes	Not assessed
19:43181581:A:C	rs141985707	PSG4_5649_83_3	COVID_C1	14	0.0596589	0.0279857	0.0330265	0.630874	-0.3679	0.0642	1.00118e-08	-0.021799	0.074143	0.768748	cis		Yes	Not assessed
19:43191870:T:A	rs1138888	PSG4_5649_83_3	COVID_C1	14	0.0596589	0.0279857	0.0330265	0.630874	-0.666	0.0245	1.01306e-162	-0.052833	0.019727	0.00740173	cis		Yes	Not assessed
19:43289991:G:T	rs182674396	PSG4_5649_83_3	COVID_C1	14	0.0596589	0.0279857	0.0330265	0.630874	0.7558	0.1269	2.58691e-09	0.078911	0.11876	0.506397	cis		Yes	Not assessed
19:43355397:T:C	rs1962260	PSG4_5649_83_3	COVID_C1	14	0.0596589	0.0279857	0.0330265	0.630874	-0.179	0.0288	5.12339e-10	0.022691	0.027377	0.407198	cis		Yes	Not assessed
2:117049781:T:C	rs147192691	PSG4_5649_83_3	COVID_C1	14	0.0596589	0.0279857	0.0330265	0.630874	-0.6326	0.1137	2.64017e-08	0.163	0.081322	0.0450296	trans		Yes	Not assessed
1:161240743:C:T	rs186663604	FCGR2B_3310	COVID_C2	32	0.0330844	0.0158067	0.0363441	0.630874	0.4306	0.0662	7.79358e-11	0.01046	0.047767	0.826666	cis		Yes	Not assessed
1:161287569:G:A	rs6656438	FCGR2B_3310	COVID_C2	32	0.0330844	0.0158067	0.0363441	0.630874	0.2244	0.0394	1.2306e-08	-0.0029453	0.02417	0.903012	cis		Yes	Not assessed
1:161305681:C:A	rs150182811	FCGR2B_3310	COVID_C2	32	0.0330844	0.0158067	0.0363441	0.630874	0.6603	0.1115	3.18102e-09	0.062087	0.083625	0.457817	cis		Yes	Not assessed
1:161329028:C:T	rs57884260	FCGR2B_3310	COVID_C2	32	0.0330844	0.0158067	0.0363441	0.630874	-0.4505	0.0751	1.98942e-09	-0.049223	0.038553	0.201686	cis		Yes	Not assessed
1:161339449:C:T	rs115605940	FCGR2B_3310	COVID_C2	32	0.0330844	0.0158067	0.0363441	0.630874	-0.4106	0.0646	2.07025e-10	-0.010006	0.036155	0.78197	cis		Yes	Not assessed
1:161362517:G:C	rs201210474	FCGR2B_3310	COVID_C2	32	0.0330844	0.0158067	0.0363441	0.630874	-0.6315	0.1047	1.62426e-09	-0.12127	0.097151	0.211935	cis		Yes	Not assessed
1:161405420:G:C	rs112252354	FCGR2B_3310	COVID_C2	32	0.0330844	0.0158067	0.0363441	0.630874	-0.377	0.0616	9.34991e-10	-0.016116	0.034941	0.64463	cis		Yes	Not assessed
1:161419170:T:C	rs4326638	FCGR2B_3310	COVID_C2	32	0.0330844	0.0158067	0.0363441	0.630874	-0.3704	0.0243	1.83826e-52	-0.030908	0.013565	0.0226962	cis		Yes	Not assessed
1:161440388:C:A	rs180854462	FCGR2B_3310	COVID_C2	32	0.0330844	0.0158067	0.0363441	0.630874	-0.3869	0.0635	1.10874e-09	-0.080206	0.054886	0.143928	cis		Yes	Not assessed
1:161494119:G:A	rs150629305	FCGR2B_3310	COVID_C2	32	0.0330844	0.0158067	0.0363441	0.630874	-0.8272	0.1299	1.9154e-10	-0.065054	0.11865	0.583496	cis		Yes	Not assessed
1:161498640:C:T	rs114797774	FCGR2B_3310	COVID_C2	32	0.0330844	0.0158067	0.0363441	0.630874	0.9165	0.0876	1.28654e-25	-0.030158	0.060439	0.617792	cis		Yes	Not assessed
1:161502999:C:A	rs10800314	FCGR2B_3310	COVID_C2	32	0.0330844	0.0158067	0.0363441	0.630874	0.6669	0.0238	9.01374e-173	0.03471	0.021622	0.108426	cis		Yes	Not assessed
1:161505324:C:G	rs72717028	FCGR2B_3310	COVID_C2	32	0.0330844	0.0158067	0.0363441	0.630874	-0.6113	0.1046	5.09105e-09	0.090437	0.060875	0.13738	cis		Yes	Not assessed
1:161511740:G:A	rs113590334	FCGR2B_3310	COVID_C2	32	0.0330844	0.0158067	0.0363441	0.630874	-0.3988	0.0619	1.17406e-10	-0.038128	0.03429	0.266169	cis		Yes	Not assessed
1:161532142:G:A	rs115264949	FCGR2B_3310	COVID_C2	32	0.0330844	0.0158067	0.0363441	0.630874	1.1332	0.098	6.32568e-31	0.074094	0.061974	0.231866	cis		Yes	Not assessed
1:161541184:C:T	rs141651278	FCGR2B_3310	COVID_C2	32	0.0330844	0.0158067	0.0363441	0.630874	-0.4351	0.0634	6.75351e-12	-0.014158	0.042748	0.740496	cis		Yes	Not assessed
1:161544666:C:T	rs144672514	FCGR2B_3310	COVID_C2	32	0.0330844	0.0158067	0.0363441	0.630874	1.0232	0.1016	7.43207e-24	0.010624	0.077494	0.890956	cis		Yes	Not assessed
1:161594602:T:C	rs115987345	FCGR2B_3310	COVID_C2	32	0.0330844	0.0158067	0.0363441	0.630874	0.9993	0.1203	9.83728e-17	0.027638	0.10571	0.793745	cis		Yes	Not assessed
1:161599779:C:T	rs138731942	FCGR2B_3310	COVID_C2	32	0.0330844	0.0158067	0.0363441	0.630874	-0.3368	0.0356	3.05964e-21	0.0059152	0.030571	0.846575	cis		Yes	Not assessed
1:161648755:G:A	rs56159502	FCGR2B_3310	COVID_C2	32	0.0330844	0.0158067	0.0363441	0.630874	-0.4123	0.0362	4.71674e-30	-0.027897	0.022941	0.223973	cis		Yes	Not assessed
1:161671594:G:A	rs6665610	FCGR2B_3310	COVID_C2	32	0.0330844	0.0158067	0.0363441	0.630874	1.3308	0.0224	0	0.026866	0.020626	0.192735	cis		Yes	Not assessed
1:161682517:C:T	rs111528110	FCGR2B_3310	COVID_C2	32	0.0330844	0.0158067	0.0363441	0.630874	0.8011	0.0627	2.21219e-37	0.018496	0.028236	0.512435	cis		Yes	Not assessed
1:161683325:C:T	rs141350127	FCGR2B_3310	COVID_C2	32	0.0330844	0.0158067	0.0363441	0.630874	1.2534	0.1353	1.97176e-20	0.13352	0.097555	0.171104	cis		Yes	Not assessed
1:161689950:T:C	rs148824583	FCGR2B_3310	COVID_C2	32	0.0330844	0.0158067	0.0363441	0.630874	-0.6665	0.076	1.79084e-18	-0.035127	0.050192	0.484019	cis		Yes	Not assessed
1:161692882:A:C	rs114883413	FCGR2B_3310	COVID_C2	32	0.0330844	0.0158067	0.0363441	0.630874	1.06	0.105	5.79902e-24	0.10682	0.097407	0.272801	cis		Yes	Not assessed
1:161708521:C:T	rs12134087	FCGR2B_3310	COVID_C2	32	0.0330844	0.0158067	0.0363441	0.630874	0.2202	0.0248	6.74445e-19	-0.0033119	0.013344	0.803984	cis		Yes	Not assessed
1:161724126:A:G	rs6696500	FCGR2B_3310	COVID_C2	32	0.0330844	0.0158067	0.0363441	0.630874	0.4261	0.038	3.51427e-29	-0.017223	0.019216	0.370101	cis		Yes	Not assessed
1:161744943:G:T	rs115291212	FCGR2B_3310	COVID_C2	32	0.0330844	0.0158067	0.0363441	0.630874	-0.436	0.0554	3.54539e-15	-0.043149	0.032245	0.180844	cis		Yes	Not assessed
1:161972701:C:G	rs4656342	FCGR2B_3310	COVID_C2	32	0.0330844	0.0158067	0.0363441	0.630874	0.2535	0.0286	7.74461e-19	0.0099184	0.016018	0.535782	cis		Yes	Not assessed
1:161985985:G:A	rs10918374	FCGR2B_3310	COVID_C2	32	0.0330844	0.0158067	0.0363441	0.630874	0.2814	0.0288	1.50211e-22	-0.00932	0.015196	0.539665	cis		Yes	Not assessed
19:51071752:C:T	rs62114140	CD33_3166	COVID_B1	16	0.110375	0.042609	0.00958631	0.89632	-0.2485	0.0424	4.60506e-09	0.088301	0.069705	0.205233	cis		Yes	Not assessed
19:51075598:G:A	rs2569487	CD33_3166	COVID_B1	16	0.110375	0.042609	0.00958631	0.89632	0.1645	0.0284	6.94482e-09	0.042038	0.043673	0.335767	cis		Yes	Not assessed
19:51137073:C:G	rs34681424	CD33_3166	COVID_B1	16	0.110375	0.042609	0.00958631	0.89632	-0.236	0.0416	1.40255e-08	-0.0018168	0.080837	0.982069	cis		Yes	Not assessed
19:51142883:G:C	rs140185670	CD33_3166	COVID_B1	16	0.110375	0.042609	0.00958631	0.89632	-0.351	0.049	7.87777e-13	0.22076	0.10814	0.0412083	cis		Yes	Not assessed
19:51177310:T:C	rs11670380	CD33_3166	COVID_B1	16	0.110375	0.042609	0.00958631	0.89632	0.3147	0.0261	1.77138e-33	0.007293	0.043384	0.866502	cis		Yes	Not assessed
19:51188632:A:G	rs80237306	CD33_3166	COVID_B1	16	0.110375	0.042609	0.00958631	0.89632	-0.7147	0.0754	2.57274e-21	-0.079766	0.16328	0.62518	cis		Yes	Not assessed
19:51217988:G:A	rs79254320	CD33_3166	COVID_B1	16	0.110375	0.042609	0.00958631	0.89632	0.4767	0.0555	8.75852e-18	-0.0055619	0.096917	0.954236	cis		Yes	Not assessed
19:51225221:C:T	rs12459419	CD33_3166	COVID_B1	16	0.110375	0.042609	0.00958631	0.89632	-0.9436	0.0209	0	-0.094564	0.044762	0.0346354	cis		Yes	Not assessed
19:51228619:A:G	rs145402896	CD33_3166	COVID_B1	16	0.110375	0.042609	0.00958631	0.89632	-0.9479	0.1064	5.15718e-19	-0.38979	0.29865	0.191834	cis		Yes	Not assessed
19:51235517:G:A	rs548309496	CD33_3166	COVID_B1	16	0.110375	0.042609	0.00958631	0.89632	1.1357	0.1343	2.75662e-17	-0.054702	0.49778	0.912495	cis		Yes	Not assessed
19:51235972:C:T	rs146995981	CD33_3166	COVID_B1	16	0.110375	0.042609	0.00958631	0.89632	0.3719	0.0439	2.42199e-17	0.20894	0.086357	0.0155422	cis		Yes	Not assessed
19:51258337:G:C	rs62115998	CD33_3166	COVID_B1	16	0.110375	0.042609	0.00958631	0.89632	-1.0727	0.0795	1.71768e-41	-0.20572	0.15831	0.193781	cis		Yes	Not assessed
19:51279712:G:A	rs61291939	CD33_3166	COVID_B1	16	0.110375	0.042609	0.00958631	0.89632	0.4311	0.061	1.58076e-12	-0.01546	0.081021	0.848671	cis		Yes	Not assessed
19:51303082:G:A	rs117496758	CD33_3166	COVID_B1	16	0.110375	0.042609	0.00958631	0.89632	-0.6034	0.0807	7.59947e-14	0.31949	0.19728	0.105345	cis		Yes	Not assessed
19:51363065:C:T	rs10411180	CD33_3166	COVID_B1	16	0.110375	0.042609	0.00958631	0.89632	-0.2249	0.0245	4.32729e-20	-0.034365	0.039724	0.386987	cis		Yes	Not assessed
19:51373988:G:T	rs150582568	CD33_3166	COVID_B1	16	0.110375	0.042609	0.00958631	0.89632	-0.3052	0.0324	4.5215e-21	-0.035723	0.059469	0.54804	cis		Yes	Not assessed
19:48702851:C:G	rs679574	LCT_9017_58	COVID_B1	37	-0.13895	0.0507128	0.00614494	0.89632	-0.1406	0.0244	8.29778e-09	-0.051194	0.039747	0.197747	trans	FUT2	Yes	Not assessed
1:98422365:C:T	rs72721827	LCT_9017_58	COVID_B1	37	-0.13895	0.0507128	0.00614494	0.89632	-0.2487	0.045	3.26372e-08	0.10608	0.076711	0.16671	trans	SNX7	Yes	Not assessed
2:134255274:A:C	rs3908137	LCT_9017_58	COVID_B1	37	-0.13895	0.0507128	0.00614494	0.89632	0.1776	0.0308	8.10626e-09	-0.093828	0.067085	0.16192	trans	MGAT5	Yes	Not assessed
2:134271226:T:C	rs60493954	LCT_9017_58	COVID_B1	37	-0.13895	0.0507128	0.00614494	0.89632	-0.3078	0.0522	3.71176e-09	0.015231	0.070816	0.829706	trans	MGAT5	Yes	Not assessed
2:134523662:G:C	rs2582922	LCT_9017_58	COVID_B1	37	-0.13895	0.0507128	0.00614494	0.89632	-0.1994	0.0342	5.52916e-09	-0.079812	0.07067	0.258745	trans	TMEM163	Yes	Not assessed
2:134528067:A:C	rs6744633	LCT_9017_58	COVID_B1	37	-0.13895	0.0507128	0.00614494	0.89632	-0.2021	0.0289	2.68917e-12	0.0474	0.044152	0.283018	trans	TMEM163	Yes	Not assessed
2:134707046:A:G	rs57891859	LCT_9017_58	COVID_B1	37	-0.13895	0.0507128	0.00614494	0.89632	-0.265	0.0277	1.1028e-21	0.034493	0.04356	0.428448	trans	TMEM163	Yes	Not assessed
2:134734197:T:C	rs79666865	LCT_9017_58	COVID_B1	37	-0.13895	0.0507128	0.00614494	0.89632	-0.7003	0.0926	3.94985e-14	0.47275	0.15756	0.00269586	trans	TMEM163	Yes	Not assessed
2:134741666:A:C	rs6727396	LCT_9017_58	COVID_B1	37	-0.13895	0.0507128	0.00614494	0.89632	-0.2937	0.0353	8.78793e-17	0.065127	0.048663	0.18079	trans	CCNT2	Yes	Not assessed
2:134948751:G:T	rs62168895	LCT_9017_58	COVID_B1	37	-0.13895	0.0507128	0.00614494	0.89632	-0.3291	0.0566	6.08199e-09	0.0010387	0.13432	0.99383	cis		Yes	Not assessed
2:134995143:C:T	rs115220505	LCT_9017_58	COVID_B1	37	-0.13895	0.0507128	0.00614494	0.89632	-0.3787	0.0671	1.66323e-08	-0.046797	0.14198	0.7417	cis		Yes	Not assessed
2:135121682:C:G	rs184273298	LCT_9017_58	COVID_B1	37	-0.13895	0.0507128	0.00614494	0.89632	-0.814	0.1335	1.07822e-09	0.31475	0.35587	0.376452	cis		Yes	Not assessed
2:135130978:G:C	rs146921207	LCT_9017_58	COVID_B1	37	-0.13895	0.0507128	0.00614494	0.89632	-0.8381	0.1185	1.52086e-12	0.1001	0.30171	0.740059	cis		Yes	Not assessed
2:135245387:T:C	rs145643567	LCT_9017_58	COVID_B1	37	-0.13895	0.0507128	0.00614494	0.89632	-0.8381	0.1342	4.23376e-10	0.20145	0.28585	0.480972	cis		Yes	Not assessed
2:135271002:C:T	rs115458360	LCT_9017_58	COVID_B1	37	-0.13895	0.0507128	0.00614494	0.89632	-0.7301	0.1181	6.32748e-10	0.16948	0.21522	0.431005	cis		Yes	Not assessed
2:135348030:G:A	rs111911277	LCT_9017_58	COVID_B1	37	-0.13895	0.0507128	0.00614494	0.89632	-1.0564	0.1461	4.80638e-13	0.22828	0.25908	0.378254	cis		Yes	Not assessed
2:135418191:T:G	rs116470115	LCT_9017_58	COVID_B1	37	-0.13895	0.0507128	0.00614494	0.89632	-0.8098	0.1156	2.4665e-12	0.16064	0.25449	0.527895	cis		Yes	Not assessed
2:135666400:A:G	rs145573563	LCT_9017_58	COVID_B1	37	-0.13895	0.0507128	0.00614494	0.89632	-0.6745	0.1153	4.91701e-09	0.20699	0.23428	0.376958	cis		Yes	Not assessed
2:135709261:C:G	rs6735935	LCT_9017_58	COVID_B1	37	-0.13895	0.0507128	0.00614494	0.89632	-0.7057	0.0989	9.64427e-13	0.23327	0.08001	0.00355107	cis		Yes	Not assessed
2:135746993:TTAG:T	rs201482431	LCT_9017_58	COVID_B1	37	-0.13895	0.0507128	0.00614494	0.89632	-0.6258	0.0941	2.92353e-11	0.18284	0.21831	0.402298	cis		Yes	Not assessed
2:135772821:G:A	rs60996006	LCT_9017_58	COVID_B1	37	-0.13895	0.0507128	0.00614494	0.89632	-0.7674	0.1001	1.76982e-14	-0.19858	0.10379	0.0557114	cis		Yes	Not assessed
2:135836074:A:G	rs148053295	LCT_9017_58	COVID_B1	37	-0.13895	0.0507128	0.00614494	0.89632	-0.7877	0.1235	1.79254e-10	0.17772	0.20673	0.38997	cis		Yes	Not assessed
2:135857243:C:G	rs309181	LCT_9017_58	COVID_B1	37	-0.13895	0.0507128	0.00614494	0.89632	0.8028	0.0257	3.31559e-214	-0.18728	0.063178	0.0030335	cis		Yes	Not assessed
2:135878655:G:C	rs147575785	LCT_9017_58	COVID_B1	37	-0.13895	0.0507128	0.00614494	0.89632	-0.7818	0.1332	4.37456e-09	0.064504	0.26678	0.808945	cis		Yes	Not assessed
2:135900428:A:C	rs148959072	LCT_9017_58	COVID_B1	37	-0.13895	0.0507128	0.00614494	0.89632	-0.7799	0.1132	5.59589e-12	-0.33249	0.2301	0.148463	cis		Yes	Not assessed
2:136005924:G:A	rs190509055	LCT_9017_58	COVID_B1	37	-0.13895	0.0507128	0.00614494	0.89632	-0.9812	0.1682	5.42664e-09	-0.26798	0.3322	0.419849	cis		Yes	Not assessed
2:136040496:C:A	rs114413176	LCT_9017_58	COVID_B1	37	-0.13895	0.0507128	0.00614494	0.89632	-0.5742	0.0903	2.03331e-10	0.070052	0.15224	0.645414	cis		Yes	Not assessed
2:136041948:G:A	rs62160867	LCT_9017_58	COVID_B1	37	-0.13895	0.0507128	0.00614494	0.89632	-0.6017	0.0716	4.3288e-17	0.26895	0.13388	0.044549	cis		Yes	Not assessed
2:136092084:A:C	rs72617027	LCT_9017_58	COVID_B1	37	-0.13895	0.0507128	0.00614494	0.89632	-0.4447	0.069	1.15656e-10	0.1398	0.080544	0.0826174	cis		Yes	Not assessed
2:136136294:C:T	rs16832995	LCT_9017_58	COVID_B1	37	-0.13895	0.0507128	0.00614494	0.89632	-0.3561	0.0457	6.58928e-15	0.15241	0.07374	0.0387477	cis		Yes	Not assessed
2:136172412:T:A	rs529560704	LCT_9017_58	COVID_B1	37	-0.13895	0.0507128	0.00614494	0.89632	-0.501	0.0772	8.60433e-11	0.032607	0.17958	0.855917	cis		Yes	Not assessed
2:136256642:CT:C	rs149343241	LCT_9017_58	COVID_B1	37	-0.13895	0.0507128	0.00614494	0.89632	-0.2979	0.0369	6.84957e-16	0.091375	0.070832	0.197042	cis		Yes	Not assessed
2:136281660:C:A	rs10206655	LCT_9017_58	COVID_B1	37	-0.13895	0.0507128	0.00614494	0.89632	-0.4259	0.0579	1.89807e-13	0.026178	0.076592	0.732513	cis		Yes	Not assessed
2:136400414:A:G	rs1949297	LCT_9017_58	COVID_B1	37	-0.13895	0.0507128	0.00614494	0.89632	0.2226	0.0256	3.45877e-18	-0.076735	0.043998	0.0811492	cis		Yes	Not assessed
2:136423381:C:G	rs13015216	LCT_9017_58	COVID_B1	37	-0.13895	0.0507128	0.00614494	0.89632	0.2527	0.0267	2.95196e-21	-0.011059	0.044825	0.805129	cis		Yes	Not assessed
2:136879174:A:G	rs112257297	LCT_9017_58	COVID_B1	37	-0.13895	0.0507128	0.00614494	0.89632	0.1862	0.0283	4.72016e-11	0.060013	0.049137	0.221957	trans	THSD7B	Yes	Not assessed
9:133274295:A:T	rs115478735	LCT_9017_58	COVID_B1	37	-0.13895	0.0507128	0.00614494	0.89632	-0.1894	0.0321	3.62816e-09	-0.047339	0.063523	0.456135	trans	ABO	Yes	Not assessed
1:98422365:C:T	rs72721827	LCT_9017_58	COVID_B2	37	-0.13895	0.0507128	0.00614494	0.89632	-0.2487	0.045	3.26372e-08	0.051416	0.038593	0.182774	trans	SNX7	Yes	Not assessed
2:134255274:A:C	rs3908137	LCT_9017_58	COVID_B2	37	-0.13895	0.0507128	0.00614494	0.89632	0.1776	0.0308	8.10626e-09	-0.059524	0.038754	0.124552	trans	MGAT5	Yes	Not assessed
2:134271226:T:C	rs60493954	LCT_9017_58	COVID_B2	37	-0.13895	0.0507128	0.00614494	0.89632	-0.3078	0.0522	3.71176e-09	-0.03488	0.035974	0.332251	trans	MGAT5	Yes	Not assessed
2:134523662:G:C	rs2582922	LCT_9017_58	COVID_B2	37	-0.13895	0.0507128	0.00614494	0.89632	-0.1994	0.0342	5.52916e-09	0.054417	0.034652	0.116325	trans	TMEM163	Yes	Not assessed
2:134528067:A:C	rs6744633	LCT_9017_58	COVID_B2	37	-0.13895	0.0507128	0.00614494	0.89632	-0.2021	0.0289	2.68917e-12	0.010042	0.022933	0.66147	trans	TMEM163	Yes	Not assessed
2:134707046:A:G	rs57891859	LCT_9017_58	COVID_B2	37	-0.13895	0.0507128	0.00614494	0.89632	-0.265	0.0277	1.1028e-21	0.024157	0.025662	0.346524	trans	TMEM163	Yes	Not assessed
2:134734197:T:C	rs79666865	LCT_9017_58	COVID_B2	37	-0.13895	0.0507128	0.00614494	0.89632	-0.7003	0.0926	3.94985e-14	0.022701	0.08684	0.793775	trans	TMEM163	Yes	Not assessed
2:134741666:A:C	rs6727396	LCT_9017_58	COVID_B2	37	-0.13895	0.0507128	0.00614494	0.89632	-0.2937	0.0353	8.78793e-17	0.047815	0.027637	0.0836109	trans	CCNT2	Yes	Not assessed
2:134948751:G:T	rs62168895	LCT_9017_58	COVID_B2	37	-0.13895	0.0507128	0.00614494	0.89632	-0.3291	0.0566	6.08199e-09	0.073416	0.0621	0.237118	cis		Yes	Not assessed
2:134995143:C:T	rs115220505	LCT_9017_58	COVID_B2	37	-0.13895	0.0507128	0.00614494	0.89632	-0.3787	0.0671	1.66323e-08	-3.0132e-05	0.06633	0.999638	cis		Yes	Not assessed
2:135121682:C:G	rs184273298	LCT_9017_58	COVID_B2	37	-0.13895	0.0507128	0.00614494	0.89632	-0.814	0.1335	1.07822e-09	0.12921	0.12947	0.318283	cis		Yes	Not assessed
2:135130978:G:C	rs146921207	LCT_9017_58	COVID_B2	37	-0.13895	0.0507128	0.00614494	0.89632	-0.8381	0.1185	1.52086e-12	-0.090277	0.10615	0.395066	cis		Yes	Not assessed
2:135245387:T:C	rs145643567	LCT_9017_58	COVID_B2	37	-0.13895	0.0507128	0.00614494	0.89632	-0.8381	0.1342	4.23376e-10	0.064968	0.1203	0.589163	cis		Yes	Not assessed
2:135308478:C:T	rs147991728	LCT_9017_58	COVID_B2	37	-0.13895	0.0507128	0.00614494	0.89632	-1.0667	0.1633	6.48324e-11	-0.11562	0.17717	0.514018	cis		Yes	Not assessed
2:135348030:G:A	rs111911277	LCT_9017_58	COVID_B2	37	-0.13895	0.0507128	0.00614494	0.89632	-1.0564	0.1461	4.80638e-13	0.027712	0.11067	0.802276	cis		Yes	Not assessed
2:135418191:T:G	rs116470115	LCT_9017_58	COVID_B2	37	-0.13895	0.0507128	0.00614494	0.89632	-0.8098	0.1156	2.4665e-12	-0.061822	0.10362	0.55076	cis		Yes	Not assessed
2:135709261:C:G	rs6735935	LCT_9017_58	COVID_B2	37	-0.13895	0.0507128	0.00614494	0.89632	-0.7057	0.0989	9.64427e-13	0.17516	0.050855	0.000572535	cis		Yes	Not assessed
2:135746993:TTAG:T	rs201482431	LCT_9017_58	COVID_B2	37	-0.13895	0.0507128	0.00614494	0.89632	-0.6258	0.0941	2.92353e-11	0.060843	0.072153	0.399089	cis		Yes	Not assessed
2:135836074:A:G	rs148053295	LCT_9017_58	COVID_B2	37	-0.13895	0.0507128	0.00614494	0.89632	-0.7877	0.1235	1.79254e-10	0.061449	0.15861	0.698444	cis		Yes	Not assessed
2:135857243:C:G	rs309181	LCT_9017_58	COVID_B2	37	-0.13895	0.0507128	0.00614494	0.89632	0.8028	0.0257	3.31559e-214	-0.061666	0.029028	0.0336398	cis		Yes	Not assessed
2:135878655:G:C	rs147575785	LCT_9017_58	COVID_B2	37	-0.13895	0.0507128	0.00614494	0.89632	-0.7818	0.1332	4.37456e-09	-0.13129	0.114	0.249458	cis		Yes	Not assessed
2:135895878:G:T	rs142411099	LCT_9017_58	COVID_B2	37	-0.13895	0.0507128	0.00614494	0.89632	-0.9217	0.1398	4.31056e-11	0.027276	0.1964	0.889545	cis		Yes	Not assessed
2:135900428:A:C	rs148959072	LCT_9017_58	COVID_B2	37	-0.13895	0.0507128	0.00614494	0.89632	-0.7799	0.1132	5.59589e-12	-0.18135	0.12303	0.140473	cis		Yes	Not assessed
2:136005924:G:A	rs190509055	LCT_9017_58	COVID_B2	37	-0.13895	0.0507128	0.00614494	0.89632	-0.9812	0.1682	5.42664e-09	-0.18161	0.15925	0.254116	cis		Yes	Not assessed
2:136040496:C:A	rs114413176	LCT_9017_58	COVID_B2	37	-0.13895	0.0507128	0.00614494	0.89632	-0.5742	0.0903	2.03331e-10	0.067854	0.079457	0.393121	cis		Yes	Not assessed
2:136041948:G:A	rs62160867	LCT_9017_58	COVID_B2	37	-0.13895	0.0507128	0.00614494	0.89632	-0.6017	0.0716	4.3288e-17	0.11925	0.096892	0.218416	cis		Yes	Not assessed
2:136092084:A:C	rs72617027	LCT_9017_58	COVID_B2	37	-0.13895	0.0507128	0.00614494	0.89632	-0.4447	0.069	1.15656e-10	0.084767	0.047832	0.0763644	cis		Yes	Not assessed
2:136136294:C:T	rs16832995	LCT_9017_58	COVID_B2	37	-0.13895	0.0507128	0.00614494	0.89632	-0.3561	0.0457	6.58928e-15	0.01945	0.039426	0.62178	cis		Yes	Not assessed
2:136172412:T:A	rs529560704	LCT_9017_58	COVID_B2	37	-0.13895	0.0507128	0.00614494	0.89632	-0.501	0.0772	8.60433e-11	0.021614	0.079484	0.785677	cis		Yes	Not assessed
2:136256642:CT:C	rs149343241	LCT_9017_58	COVID_B2	37	-0.13895	0.0507128	0.00614494	0.89632	-0.2979	0.0369	6.84957e-16	0.069158	0.035037	0.0483981	cis		Yes	Not assessed
2:136281660:C:A	rs10206655	LCT_9017_58	COVID_B2	37	-0.13895	0.0507128	0.00614494	0.89632	-0.4259	0.0579	1.89807e-13	-0.024313	0.040375	0.547055	cis		Yes	Not assessed
2:136400414:A:G	rs1949297	LCT_9017_58	COVID_B2	37	-0.13895	0.0507128	0.00614494	0.89632	0.2226	0.0256	3.45877e-18	-0.040329	0.027003	0.135306	cis		Yes	Not assessed
2:136423381:C:G	rs13015216	LCT_9017_58	COVID_B2	37	-0.13895	0.0507128	0.00614494	0.89632	0.2527	0.0267	2.95196e-21	0.027229	0.025482	0.285269	cis		Yes	Not assessed
2:136879174:A:G	rs112257297	LCT_9017_58	COVID_B2	37	-0.13895	0.0507128	0.00614494	0.89632	0.1862	0.0283	4.72016e-11	-0.001493	0.026399	0.9549	trans	THSD7B	Yes	Not assessed
3:45636290:G:A	rs36136468	PDGFRL_9713_67_3	COVID_B1	26	0.0753346	0.0371722	0.0426992	0.942354	-0.1717	0.0285	1.69569e-09	-0.058562	0.050192	0.243307	trans	LIMD1	Yes	Not assessed
3:45861352:G:A	rs1024626	PDGFRL_9713_67_3	COVID_B1	26	0.0753346	0.0371722	0.0426992	0.942354	0.3435	0.0593	6.93132e-09	0.022671	0.10958	0.836096	trans	CCR1	Yes	Not assessed
3:45926454:C:T	rs58357264	PDGFRL_9713_67_3	COVID_B1	26	0.0753346	0.0371722	0.0426992	0.942354	0.5269	0.0933	1.62917e-08	-0.081802	0.14327	0.568024	trans	CCR1	Yes	Not assessed
3:46058811:C:T	rs116277633	PDGFRL_9713_67_3	COVID_B1	26	0.0753346	0.0371722	0.0426992	0.942354	0.7188	0.0781	3.46202e-20	0.13371	0.17094	0.434095	trans	CCR2	Yes	Not assessed
3:46159331:A:C	rs9850642	PDGFRL_9713_67_3	COVID_B1	26	0.0753346	0.0371722	0.0426992	0.942354	0.299	0.0242	4.55644e-35	-0.0378	0.044169	0.392106	trans	CCR1	Yes	Not assessed
3:46260117:C:T	rs140597534	PDGFRL_9713_67_3	COVID_B1	26	0.0753346	0.0371722	0.0426992	0.942354	0.7004	0.0944	1.17571e-13	-0.058838	0.17237	0.732842	trans	CCR3	Yes	Not assessed
3:46285357:T:C	rs77116118	PDGFRL_9713_67_3	COVID_B1	26	0.0753346	0.0371722	0.0426992	0.942354	0.6726	0.1098	9.02954e-10	0.071858	0.17551	0.682229	trans	CCR1	Yes	Not assessed
3:46292570:G:C	rs111227877	PDGFRL_9713_67_3	COVID_B1	26	0.0753346	0.0371722	0.0426992	0.942354	0.7373	0.115	1.4428e-10	0.093468	0.29749	0.753378	trans	TDGF1	Yes	Not assessed
3:46313143:ACTT:A	rs201310139	PDGFRL_9713_67_3	COVID_B1	26	0.0753346	0.0371722	0.0426992	0.942354	0.5077	0.0671	3.83949e-14	0.1149	0.16422	0.484133	trans	CCR1	Yes	Not assessed
3:46381434:T:C	rs17141074	PDGFRL_9713_67_3	COVID_B1	26	0.0753346	0.0371722	0.0426992	0.942354	0.8495	0.0957	6.88745e-19	0.3926	0.20286	0.0529504	trans	TDGF1	Yes	Not assessed
3:46427396:G:T	rs2373242	PDGFRL_9713_67_3	COVID_B1	26	0.0753346	0.0371722	0.0426992	0.942354	-0.3174	0.0246	4.36073e-38	-0.0063296	0.040015	0.874314	trans	CCR3	Yes	Not assessed
3:46442084:A:T	rs56226331	PDGFRL_9713_67_3	COVID_B1	26	0.0753346	0.0371722	0.0426992	0.942354	0.9863	0.0971	3.06625e-24	0.16586	0.10368	0.109659	trans	LTF	Yes	Not assessed
3:46448522:T:C	rs137895522	PDGFRL_9713_67_3	COVID_B1	26	0.0753346	0.0371722	0.0426992	0.942354	0.948	0.1725	3.89269e-08	0.063661	0.20961	0.761348	trans	LTF	Yes	Not assessed
3:46459794:C:CCTT	rs10662431	PDGFRL_9713_67_3	COVID_B1	26	0.0753346	0.0371722	0.0426992	0.942354	0.428	0.0692	6.21138e-10	-0.01613	0.20116	0.93609	trans	LTF	Yes	Not assessed
3:46460279:C:G	rs4683234	PDGFRL_9713_67_3	COVID_B1	26	0.0753346	0.0371722	0.0426992	0.942354	1.0394	0.0198	0	0.1031	0.042424	0.0150893	trans	LTF	Yes	Not assessed
3:46462219:C:T	rs59283024	PDGFRL_9713_67_3	COVID_B1	26	0.0753346	0.0371722	0.0426992	0.942354	0.9376	0.1546	1.32214e-09	0.026086	0.096718	0.787382	trans	ALS2CL	Yes	Not assessed
3:46465711:AT:A	rs199969112	PDGFRL_9713_67_3	COVID_B1	26	0.0753346	0.0371722	0.0426992	0.942354	0.7929	0.1179	1.75362e-11	0.25055	0.26836	0.350493	trans	LTF	Yes	Not assessed
3:46473623:C:T	rs115783274	PDGFRL_9713_67_3	COVID_B1	26	0.0753346	0.0371722	0.0426992	0.942354	0.8891	0.0867	1.1249e-24	-0.020108	0.16673	0.904006	trans	LTF	Yes	Not assessed
3:46478298:T:C	rs181998213	PDGFRL_9713_67_3	COVID_B1	26	0.0753346	0.0371722	0.0426992	0.942354	1.0188	0.1422	7.80385e-13	0.36295	0.30935	0.240689	trans	TDGF1	Yes	Not assessed
3:46479133:A:C	rs75149215	PDGFRL_9713_67_3	COVID_B1	26	0.0753346	0.0371722	0.0426992	0.942354	1.0521	0.1135	1.86839e-20	0.27646	0.22696	0.223186	trans	LTF	Yes	Not assessed
3:46550357:C:T	rs9861962	PDGFRL_9713_67_3	COVID_B1	26	0.0753346	0.0371722	0.0426992	0.942354	-0.3062	0.0245	7.65923e-36	0.021524	0.039539	0.586184	trans	TDGF1	Yes	Not assessed
3:46594728:G:A	rs17221605	PDGFRL_9713_67_3	COVID_B1	26	0.0753346	0.0371722	0.0426992	0.942354	-0.2587	0.0415	4.55443e-10	0.099456	0.070188	0.156485	trans	TDGF1	Yes	Not assessed
3:46621354:T:TAA	rs35457559	PDGFRL_9713_67_3	COVID_B1	26	0.0753346	0.0371722	0.0426992	0.942354	-0.1517	0.0268	1.50979e-08	-0.030533	0.056633	0.589792	trans	TDGF1	Yes	Not assessed
3:46655307:T:C	rs17079097	PDGFRL_9713_67_3	COVID_B1	26	0.0753346	0.0371722	0.0426992	0.942354	0.2763	0.0412	1.99607e-11	-0.014674	0.064982	0.821344	trans	ALS2CL	Yes	Not assessed
3:46674156:G:A	rs55991232	PDGFRL_9713_67_3	COVID_B1	26	0.0753346	0.0371722	0.0426992	0.942354	0.168	0.0296	1.38142e-08	-0.063289	0.048124	0.188468	trans	ALS2CL	Yes	Not assessed
3:46794582:G:C	rs148742710	PDGFRL_9713_67_3	COVID_B1	26	0.0753346	0.0371722	0.0426992	0.942354	-0.3235	0.0387	6.31594e-17	0.068145	0.075156	0.364558	trans	TDGF1	Yes	Not assessed
12:111693894:G:T	rs632650	SELL_4831_4_2	COVID_B1	10	0.146899	0.0692894	0.0339999	0.942354	-0.1887	0.0344	4.12383e-08	0.035161	0.052934	0.506535	trans	ACAD10	Yes	Not assessed
12:24423281:A:G	rs75385614	SELL_4831_4_2	COVID_B1	10	0.146899	0.0692894	0.0339999	0.942354	-0.2504	0.0444	1.70406e-08	-0.073224	0.092546	0.428817	trans	BCAT1	Yes	Not assessed
17:7064853:G:A	rs187345738	SELL_4831_4_2	COVID_B1	10	0.146899	0.0692894	0.0339999	0.942354	0.748	0.1351	3.0833e-08	0.28099	0.36036	0.435539	trans	SLC16A11	Yes	Not assessed
1:169608095:A:G	rs2142760	SELL_4831_4_2	COVID_B1	10	0.146899	0.0692894	0.0339999	0.942354	-0.2401	0.025	7.69008e-22	-0.04978	0.052	0.338412	cis		Yes	Not assessed
1:169696410:G:T	rs4987358	SELL_4831_4_2	COVID_B1	10	0.146899	0.0692894	0.0339999	0.942354	-0.5165	0.0261	3.68323e-87	-0.073934	0.043109	0.0863364	cis		Yes	Not assessed
1:169738751:A:C	rs76798248	SELL_4831_4_2	COVID_B1	10	0.146899	0.0692894	0.0339999	0.942354	-0.5348	0.0978	4.54366e-08	-0.11801	0.2012	0.557519	cis		Yes	Not assessed
1:169761346:G:A	rs4656717	SELL_4831_4_2	COVID_B1	10	0.146899	0.0692894	0.0339999	0.942354	0.3057	0.042	3.37374e-13	0.012794	0.069474	0.853892	cis		Yes	Not assessed
1:169768244:A:C	rs562679239	SELL_4831_4_2	COVID_B1	10	0.146899	0.0692894	0.0339999	0.942354	0.3372	0.043	4.43919e-15	-0.033118	0.09259	0.720579	cis		Yes	Not assessed
1:169856388:A:G	rs12128754	SELL_4831_4_2	COVID_B1	10	0.146899	0.0692894	0.0339999	0.942354	0.2484	0.034	2.75453e-13	0.11579	0.051767	0.0253025	cis		Yes	Not assessed
1:170084705:A:G	rs187579255	SELL_4831_4_2	COVID_B1	10	0.146899	0.0692894	0.0339999	0.942354	-0.7193	0.1276	1.7289e-08	0.0097395	0.29678	0.97382	cis		Yes	Not assessed
6:30094873:G:A	rs28780078	USP25_9215_117_3	COVID_B1	18	0.116349	0.0487339	0.0169667	0.942354	0.1937	0.0316	8.8019e-10	0.078263	0.045097	0.0826634	trans	RNF39	Yes	Not assessed
6:30963282:C:T	rs6928738	USP25_9215_117_3	COVID_B1	18	0.116349	0.0487339	0.0169667	0.942354	0.5183	0.0539	6.84707e-22	0.034458	0.10412	0.740686	trans	VARS2	Yes	Not assessed
6:31301933:G:A	rs28367682	USP25_9215_117_3	COVID_B1	18	0.116349	0.0487339	0.0169667	0.942354	0.5053	0.0406	1.47376e-35	-0.018998	0.089591	0.832066	trans	HLA-B	Yes	Not assessed
6:31347808:G:T	rs36119838	USP25_9215_117_3	COVID_B1	18	0.116349	0.0487339	0.0169667	0.942354	0.349	0.0447	5.82843e-15	-0.021096	0.074139	0.775992	trans	LINC02571	Yes	Not assessed
6:31422588:T:C	rs201023435	USP25_9215_117_3	COVID_B1	18	0.116349	0.0487339	0.0169667	0.942354	1.1983	0.0703	3.77378e-65	0.14344	0.12643	0.256568	trans	MICB	Yes	Not assessed
6:31491216:A:G	rs2395490	USP25_9215_117_3	COVID_B1	18	0.116349	0.0487339	0.0169667	0.942354	-0.1874	0.0248	4.14214e-14	0.018501	0.044437	0.67716	trans	MICB	Yes	Not assessed
6:31495154:T:A	rs2534681	USP25_9215_117_3	COVID_B1	18	0.116349	0.0487339	0.0169667	0.942354	0.1659	0.0245	1.27517e-11	-0.0028229	0.039135	0.942497	trans	MICB	Yes	Not assessed
6:31557961:TG:T	rs34877047	USP25_9215_117_3	COVID_B1	18	0.116349	0.0487339	0.0169667	0.942354	-0.5558	0.0803	4.46747e-12	0.33244	0.18786	0.0767912	trans	LST1	Yes	Not assessed
6:31893364:A:T	rs2844457	USP25_9215_117_3	COVID_B1	18	0.116349	0.0487339	0.0169667	0.942354	-0.2122	0.0259	2.54688e-16	-0.061908	0.045187	0.170674	trans	EHMT2	Yes	Not assessed
6:32051735:T:C	rs41316748	USP25_9215_117_3	COVID_B1	18	0.116349	0.0487339	0.0169667	0.942354	1.306	0.0574	1.35202e-114	0.25866	0.11934	0.0302028	trans	MICB	Yes	Not assessed
6:32054370:A:G	rs150622545	USP25_9215_117_3	COVID_B1	18	0.116349	0.0487339	0.0169667	0.942354	-0.3736	0.0533	2.39375e-12	-0.047714	0.095579	0.617631	trans	LST1	Yes	Not assessed
6:32457192:C:T	rs28895195	USP25_9215_117_3	COVID_B1	18	0.116349	0.0487339	0.0169667	0.942354	0.2734	0.0334	2.70886e-16	0.012179	0.076081	0.872819	trans	HLA-DRB5	Yes	Not assessed
6:32613870:A:G	rs9271303	USP25_9215_117_3	COVID_B1	18	0.116349	0.0487339	0.0169667	0.942354	0.1528	0.0247	6.16182e-10	-0.030661	0.04832	0.525728	trans	HLA-DQA2	Yes	Not assessed
6:32642780:G:A	rs28400568	USP25_9215_117_3	COVID_B1	18	0.116349	0.0487339	0.0169667	0.942354	0.4049	0.034	1.06469e-32	0.084452	0.074738	0.258487	trans	HLA-DQA1	Yes	Not assessed
6:32644280:T:A	rs28371173	USP25_9215_117_3	COVID_B1	18	0.116349	0.0487339	0.0169667	0.942354	0.3754	0.0343	7.05234e-28	0.29357	0.22885	0.19956	trans	HLA-DQA1	Yes	Not assessed
6:32661164:G:C	rs9273554	USP25_9215_117_3	COVID_B1	18	0.116349	0.0487339	0.0169667	0.942354	0.5425	0.0435	1.07113e-35	0.11252	0.080182	0.160525	trans	HLA-DQB1	Yes	Not assessed
6:32915656:T:TACA	rs35510212	USP25_9215_117_3	COVID_B1	18	0.116349	0.0487339	0.0169667	0.942354	-0.1597	0.0254	3.22824e-10	0.0032533	0.047617	0.945529	trans	PSMB9	Yes	Not assessed
6:33056103:T:C	rs9277193	USP25_9215_117_3	COVID_B1	18	0.116349	0.0487339	0.0169667	0.942354	-0.1406	0.0247	1.25334e-08	-0.0024795	0.039275	0.949662	trans	HLA-DOA	Yes	Not assessed
