# Supplementary material for: A proteome-wide genetic investigation identifies several SARS-CoV-2-exploited host targets of clinical relevance
Source: eLife. 2021 Aug 17;10:e69719. doi: 10.7554/eLife.69719 (PMC8457835; doi:10.7554/eLife.69719)
Supplement: Supplementary file 4. [file elife-69719-supp4.xlsx]

## Sheet: Sheet1
cis-Mendelian randomization (bxy_p < 0.05)
snp	rsid	probe	outcome	nsnps	bxy	bxy_se	bxy_p	fdr_bxy_p	bzx	bzx_se	bzx_pval	bzy	bzy_se	bzy_pval	cis-eqtl	missense
9:133086422:T:C	rs679779	ABO.9253.52.3	COVID_A2	34	0.129122	0.0298907	1.56162e-05	0.00476294	-0.1375	0.0286	1.52683e-06	0.0076787	0.04372	0.860582	Yes	non_coding_transcript_exon_variant
9:133155928:T:C	rs117595304	ABO.9253.52.3	COVID_A2	34	0.129122	0.0298907	1.56162e-05	0.00476294	0.8535	0.1921	8.87138e-06	-0.076023	0.2986	0.799034	No	missense_variant (but not missense for ABO)
9:133156531:G:A	rs7027827	ABO.9253.52.3	COVID_A2	34	0.129122	0.0298907	1.56162e-05	0.00476294	0.2975	0.0308	4.49838e-22	0.12763	0.046684	0.00625866	Yes	intron_variant		Legend
9:133164763:C:T	rs34394935	ABO.9253.52.3	COVID_A2	34	0.129122	0.0298907	1.56162e-05	0.00476294	0.5606	0.124	6.15576e-06	0.33659	0.37085	0.36408	Yes	upstream_gene_variant		snp	cis-acting snp used to genetically represent protein probe in the format chr:pos:ref:alt, with position from GRCh38 build
9:133165340:C:G	rs9411461	ABO.9253.52.3	COVID_A2	34	0.129122	0.0298907	1.56162e-05	0.00476294	-0.1656	0.028	3.33319e-09	-0.056342	0.041496	0.174537	Yes	upstream_gene_variant		probe	protein probe used by SomaLogic to quantify protein abundance
9:133165512:C:A	rs7044834	ABO.9253.52.3	COVID_A2	34	0.129122	0.0298907	1.56162e-05	0.00476294	-0.2538	0.0385	4.33334e-11	-0.032105	0.052547	0.541215	Yes	upstream_gene_variant		outcome	COVID outcome (for definitions, see COVID_definitions)
9:133183922:G:A	rs60526253	ABO.9253.52.3	COVID_A2	34	0.129122	0.0298907	1.56162e-05	0.00476294	-0.3173	0.0372	1.46893e-17	-0.031379	0.04354	0.471098	Yes	intergenic_variant		nsnps	Number of SNPs used as cis-acting instruments for each protein probe
9:133203795:G:A	rs11244033	ABO.9253.52.3	COVID_A2	34	0.129122	0.0298907	1.56162e-05	0.00476294	0.3777	0.0258	1.5714e-48	0.029515	0.038855	0.447482	Yes	downstream_gene_variant		bxy	log odds ratio of outcome per SD of genetically predicted protein probe
9:133205125:A:C	rs149189328	ABO.9253.52.3	COVID_A2	34	0.129122	0.0298907	1.56162e-05	0.00476294	0.8224	0.0863	1.57969e-21	0.13327	0.15111	0.377809	Yes	downstream_gene_variant		bxy_se	standard error of bxy
9:133211179:TG:T	rs782108791	ABO.9253.52.3	COVID_A2	34	0.129122	0.0298907	1.56162e-05	0.00476294	-0.3558	0.0418	1.71015e-17	0.0020774	0.066953	0.975247	Yes	upstream_gene_variant		bxy_p	p-value of bxy
9:133230925:G:T	rs112785592	ABO.9253.52.3	COVID_A2	34	0.129122	0.0298907	1.56162e-05	0.00476294	-0.561	0.1197	2.77623e-06	0.11184	0.21536	0.60354	Yes	upstream_gene_variant		fdr	fdr-corrected p-value of bxy for each outcome
9:133231250:G:A	rs137987574	ABO.9253.52.3	COVID_A2	34	0.129122	0.0298907	1.56162e-05	0.00476294	-0.5212	0.0986	1.25017e-07	-0.14462	0.16967	0.394014	Yes	upstream_gene_variant		bzx	Estimate of the association between snp and protein probe
9:133239032:G:A	rs142599019	ABO.9253.52.3	COVID_A2	34	0.129122	0.0298907	1.56162e-05	0.00476294	-0.5295	0.1167	5.69858e-06	-0.2486	0.19435	0.200849	Yes	regulatory_region_variant		bzx_se	standard error of bzx
9:133246236:C:T	rs145526382	ABO.9253.52.3	COVID_A2	34	0.129122	0.0298907	1.56162e-05	0.00476294	0.8842	0.0755	1.11611e-31	0.21526	0.10216	0.03511	Yes	downstream_gene_variant		bzx_pval	p-value of bzx
9:133255963:G:T	rs8176744	ABO.9253.52.3	COVID_A2	34	0.129122	0.0298907	1.56162e-05	0.00476294	-0.5209	0.0598	3.01998e-18	-0.35203	0.10827	0.00114835	Yes	non_coding_transcript_exon_variant		bzy	Estimate of the association between snp and outcome
9:133257521:T:TC	rs8176719	ABO.9253.52.3	COVID_A2	34	0.129122	0.0298907	1.56162e-05	0.00476294	1.2044	0.0158	0	0.15094	0.038232	7.88063e-05	Yes	frameshift_variant		bzy_se	standard error of bzy
9:133284592:G:A	rs146174278	ABO.9253.52.3	COVID_A2	34	0.129122	0.0298907	1.56162e-05	0.00476294	-0.5686	0.1215	2.87105e-06	-0.098572	0.19412	0.611601	Yes	intergenic_variant		bzy_pval	p-value of bzy
9:133286683:T:C	rs68032997	ABO.9253.52.3	COVID_A2	34	0.129122	0.0298907	1.56162e-05	0.00476294	-0.4887	0.0626	5.87005e-15	-0.081896	0.089688	0.361179	Yes	regulatory_region_variant
9:133291776:AG:A	rs199659153	ABO.9253.52.3	COVID_A2	34	0.129122	0.0298907	1.56162e-05	0.00476294	-0.455	0.0724	3.28846e-10	-0.069795	0.11763	0.552951	Yes	intergenic_variant
9:133294153:A:C	rs116851371	ABO.9253.52.3	COVID_A2	34	0.129122	0.0298907	1.56162e-05	0.00476294	1.0094	0.1733	5.72558e-09	0.16303	0.25275	0.518911	Yes	intergenic_variant
9:133295160:G:A	rs7869258	ABO.9253.52.3	COVID_A2	34	0.129122	0.0298907	1.56162e-05	0.00476294	0.4292	0.0246	3.61814e-68	0.12101	0.037613	0.00129431	Yes	intergenic_variant
9:133318150:T:C	rs11791119	ABO.9253.52.3	COVID_A2	34	0.129122	0.0298907	1.56162e-05	0.00476294	-0.194	0.0263	1.62595e-13	0.011511	0.039544	0.77098	Yes	intron_variant
9:133319751:C:T	rs12683804	ABO.9253.52.3	COVID_A2	34	0.129122	0.0298907	1.56162e-05	0.00476294	-0.2884	0.029	2.65634e-23	0.010291	0.042433	0.808375	Yes	downstream_gene_variant
9:133321580:C:T	rs79518626	ABO.9253.52.3	COVID_A2	34	0.129122	0.0298907	1.56162e-05	0.00476294	0.7864	0.0566	6.88856e-44	0.065888	0.078672	0.40231	Yes	downstream_gene_variant
9:133341592:C:T	rs78711238	ABO.9253.52.3	COVID_A2	34	0.129122	0.0298907	1.56162e-05	0.00476294	1.149	0.1038	1.7665e-28	-0.050325	0.15913	0.751812	Yes	synonymous_variant
9:133356757:CAGGGGAG:C	rs587680893	ABO.9253.52.3	COVID_A2	34	0.129122	0.0298907	1.56162e-05	0.00476294	0.898	0.0698	7.05405e-38	0.22221	0.11075	0.0448124	Yes	intron_variant
9:133412734:G:A	rs2285488	ABO.9253.52.3	COVID_A2	34	0.129122	0.0298907	1.56162e-05	0.00476294	-0.3874	0.0313	3.48127e-35	-0.035596	0.049695	0.473813	Yes	intron_variant
9:133471682:C:T	rs41307428	ABO.9253.52.3	COVID_A2	34	0.129122	0.0298907	1.56162e-05	0.00476294	0.4277	0.0811	1.33674e-07	-0.070254	0.1166	0.546827	Yes	3_prime_UTR_variant
9:133482710:T:C	rs72779222	ABO.9253.52.3	COVID_A2	34	0.129122	0.0298907	1.56162e-05	0.00476294	-0.316	0.0514	7.85353e-10	-0.13392	0.086103	0.119864	Yes	upstream_gene_variant
9:133483093:A:G	rs34108489	ABO.9253.52.3	COVID_A2	34	0.129122	0.0298907	1.56162e-05	0.00476294	0.1419	0.0287	7.64372e-07	0.033564	0.041513	0.418793	Yes	upstream_gene_variant
9:133509774:G:A	rs28463601	ABO.9253.52.3	COVID_A2	34	0.129122	0.0298907	1.56162e-05	0.00476294	0.2333	0.0449	2.03632e-07	0.072011	0.075489	0.340121	Yes	downstream_gene_variant
9:133517594:A:G	rs9802874	ABO.9253.52.3	COVID_A2	34	0.129122	0.0298907	1.56162e-05	0.00476294	-0.3243	0.0259	5.71387e-36	-0.067622	0.042876	0.11476	Yes	intron_variant
9:133536945:G:T	rs28569945	ABO.9253.52.3	COVID_A2	34	0.129122	0.0298907	1.56162e-05	0.00476294	-0.3032	0.0308	7.26465e-23	-0.031981	0.047906	0.504403	Yes	intron_variant
9:133540399:G:A	rs55750924	ABO.9253.52.3	COVID_A2	34	0.129122	0.0298907	1.56162e-05	0.00476294	-0.2647	0.0491	7.00516e-08	0.042991	0.081609	0.598338	Yes	intron_variant
9:133086422:T:C	rs679779	ABO.9253.52.3	COVID_B2	34	0.114398	0.0298907	1.56162e-05	0.00476294	-0.1375	0.0286	1.52683e-06	0.0035097	0.031759	0.912005	Yes	non_coding_transcript_exon_variant
9:133155928:T:C	rs117595304	ABO.9253.52.3	COVID_B2	34	0.114398	0.0298907	1.56162e-05	0.00476294	0.8535	0.1921	8.87138e-06	0.20625	0.21781	0.343676	No	missense_variant (but not missense for ABO)
9:133156531:G:A	rs7027827	ABO.9253.52.3	COVID_B2	34	0.114398	0.0298907	1.56162e-05	0.00476294	0.2975	0.0308	4.49838e-22	0.085999	0.031936	0.00708432	Yes	intron_variant
9:133164763:C:T	rs34394935	ABO.9253.52.3	COVID_B2	34	0.114398	0.0298907	1.56162e-05	0.00476294	0.5606	0.124	6.15576e-06	0.16513	0.2615	0.527732	Yes	upstream_gene_variant
9:133165340:C:G	rs9411461	ABO.9253.52.3	COVID_B2	34	0.114398	0.0298907	1.56162e-05	0.00476294	-0.1656	0.028	3.33319e-09	-0.027157	0.030049	0.366124	Yes	upstream_gene_variant
9:133165512:C:A	rs7044834	ABO.9253.52.3	COVID_B2	34	0.114398	0.0298907	1.56162e-05	0.00476294	-0.2538	0.0385	4.33334e-11	-0.063047	0.038731	0.103564	Yes	upstream_gene_variant
9:133183922:G:A	rs60526253	ABO.9253.52.3	COVID_B2	34	0.114398	0.0298907	1.56162e-05	0.00476294	-0.3173	0.0372	1.46893e-17	-0.042701	0.033338	0.200246	Yes	intergenic_variant
9:133203795:G:A	rs11244033	ABO.9253.52.3	COVID_B2	34	0.114398	0.0298907	1.56162e-05	0.00476294	0.3777	0.0258	1.5714e-48	0.0042721	0.026197	0.870459	Yes	downstream_gene_variant
9:133205125:A:C	rs149189328	ABO.9253.52.3	COVID_B2	34	0.114398	0.0298907	1.56162e-05	0.00476294	0.8224	0.0863	1.57969e-21	0.15158	0.099986	0.129516	Yes	downstream_gene_variant
9:133211179:TG:T	rs782108791	ABO.9253.52.3	COVID_B2	34	0.114398	0.0298907	1.56162e-05	0.00476294	-0.3558	0.0418	1.71015e-17	0.028411	0.045643	0.533639	Yes	upstream_gene_variant
9:133230925:G:T	rs112785592	ABO.9253.52.3	COVID_B2	34	0.114398	0.0298907	1.56162e-05	0.00476294	-0.561	0.1197	2.77623e-06	0.21957	0.15623	0.159894	Yes	upstream_gene_variant
9:133231250:G:A	rs137987574	ABO.9253.52.3	COVID_B2	34	0.114398	0.0298907	1.56162e-05	0.00476294	-0.5212	0.0986	1.25017e-07	-0.18422	0.12917	0.153816	Yes	upstream_gene_variant
9:133239032:G:A	rs142599019	ABO.9253.52.3	COVID_B2	34	0.114398	0.0298907	1.56162e-05	0.00476294	-0.5295	0.1167	5.69858e-06	-0.037645	0.16115	0.815294	Yes	regulatory_region_variant
9:133246236:C:T	rs145526382	ABO.9253.52.3	COVID_B2	34	0.114398	0.0298907	1.56162e-05	0.00476294	0.8842	0.0755	1.11611e-31	0.11228	0.072811	0.123055	Yes	downstream_gene_variant
9:133255963:G:T	rs8176744	ABO.9253.52.3	COVID_B2	34	0.114398	0.0298907	1.56162e-05	0.00476294	-0.5209	0.0598	3.01998e-18	-0.20303	0.077337	0.00865819	Yes	non_coding_transcript_exon_variant
9:133257521:T:TC	rs8176719	ABO.9253.52.3	COVID_B2	34	0.114398	0.0298907	1.56162e-05	0.00476294	1.2044	0.0158	0	0.14495	0.025451	1.23186e-08	Yes	frameshift_variant
9:133284592:G:A	rs146174278	ABO.9253.52.3	COVID_B2	34	0.114398	0.0298907	1.56162e-05	0.00476294	-0.5686	0.1215	2.87105e-06	-0.20132	0.14577	0.167254	Yes	intergenic_variant
9:133286683:T:C	rs68032997	ABO.9253.52.3	COVID_B2	34	0.114398	0.0298907	1.56162e-05	0.00476294	-0.4887	0.0626	5.87005e-15	-0.028657	0.057499	0.618208	Yes	regulatory_region_variant
9:133291776:AG:A	rs199659153	ABO.9253.52.3	COVID_B2	34	0.114398	0.0298907	1.56162e-05	0.00476294	-0.455	0.0724	3.28846e-10	-0.077908	0.084513	0.356609	Yes	intergenic_variant
9:133294153:A:C	rs116851371	ABO.9253.52.3	COVID_B2	34	0.114398	0.0298907	1.56162e-05	0.00476294	1.0094	0.1733	5.72558e-09	-0.077737	0.25708	0.762359	Yes	intergenic_variant
9:133295160:G:A	rs7869258	ABO.9253.52.3	COVID_B2	34	0.114398	0.0298907	1.56162e-05	0.00476294	0.4292	0.0246	3.61814e-68	0.067615	0.024378	0.00554385	Yes	intergenic_variant
9:133319751:C:T	rs12683804	ABO.9253.52.3	COVID_B2	34	0.114398	0.0298907	1.56162e-05	0.00476294	-0.2884	0.029	2.65634e-23	-0.032874	0.029223	0.260616	Yes	downstream_gene_variant
9:133321580:C:T	rs79518626	ABO.9253.52.3	COVID_B2	34	0.114398	0.0298907	1.56162e-05	0.00476294	0.7864	0.0566	6.88856e-44	0.018647	0.049775	0.707939	Yes	downstream_gene_variant
9:133326519:G:A	rs76771223	ABO.9253.52.3	COVID_B2	34	0.114398	0.0298907	1.56162e-05	0.00476294	-0.3461	0.0405	1.27783e-17	0.034758	0.078508	0.65796	Yes	downstream_gene_variant
9:133341592:C:T	rs78711238	ABO.9253.52.3	COVID_B2	34	0.114398	0.0298907	1.56162e-05	0.00476294	1.149	0.1038	1.7665e-28	0.11029	0.10991	0.31564	Yes	synonymous_variant
9:133356757:CAGGGGAG:C	rs587680893	ABO.9253.52.3	COVID_B2	34	0.114398	0.0298907	1.56162e-05	0.00476294	0.898	0.0698	7.05405e-38	0.12914	0.077905	0.0973861	Yes	intron_variant
9:133412734:G:A	rs2285488	ABO.9253.52.3	COVID_B2	34	0.114398	0.0298907	1.56162e-05	0.00476294	-0.3874	0.0313	3.48127e-35	0.00097743	0.033768	0.976908	Yes	intron_variant
9:133471682:C:T	rs41307428	ABO.9253.52.3	COVID_B2	34	0.114398	0.0298907	1.56162e-05	0.00476294	0.4277	0.0811	1.33674e-07	0.068511	0.081207	0.39886	Yes	3_prime_UTR_variant
9:133482710:T:C	rs72779222	ABO.9253.52.3	COVID_B2	34	0.114398	0.0298907	1.56162e-05	0.00476294	-0.316	0.0514	7.85353e-10	-0.044135	0.059682	0.459602	Yes	upstream_gene_variant
9:133483093:A:G	rs34108489	ABO.9253.52.3	COVID_B2	34	0.114398	0.0298907	1.56162e-05	0.00476294	0.1419	0.0287	7.64372e-07	0.011323	0.029759	0.703582	Yes	upstream_gene_variant
9:133509774:G:A	rs28463601	ABO.9253.52.3	COVID_B2	34	0.114398	0.0298907	1.56162e-05	0.00476294	0.2333	0.0449	2.03632e-07	0.097025	0.051338	0.0587679	Yes	downstream_gene_variant
9:133517594:A:G	rs9802874	ABO.9253.52.3	COVID_B2	34	0.114398	0.0298907	1.56162e-05	0.00476294	-0.3243	0.0259	5.71387e-36	-0.020331	0.029574	0.491792	Yes	intron_variant
9:133536945:G:T	rs28569945	ABO.9253.52.3	COVID_B2	34	0.114398	0.0298907	1.56162e-05	0.00476294	-0.3032	0.0308	7.26465e-23	-0.021159	0.029571	0.47428	Yes	intron_variant
9:133540399:G:A	rs55750924	ABO.9253.52.3	COVID_B2	34	0.114398	0.0298907	1.56162e-05	0.00476294	-0.2647	0.0491	7.00516e-08	-0.0029145	0.053028	0.956169	Yes	intron_variant
9:133086422:T:C	rs679779	ABO.9253.52.3	COVID_C1	34	0.0652197	0.0298907	1.56162e-05	0.00476294	-0.1375	0.0286	1.52683e-06	0.0047748	0.026995	0.859605	Yes	non_coding_transcript_exon_variant
9:133155928:T:C	rs117595304	ABO.9253.52.3	COVID_C1	34	0.0652197	0.0298907	1.56162e-05	0.00476294	0.8535	0.1921	8.87138e-06	0.11568	0.14605	0.428327	No	missense_variant (but not missense for ABO)
9:133156531:G:A	rs7027827	ABO.9253.52.3	COVID_C1	34	0.0652197	0.0298907	1.56162e-05	0.00476294	0.2975	0.0308	4.49838e-22	0.045517	0.023537	0.0531317	Yes	intron_variant
9:133164763:C:T	rs34394935	ABO.9253.52.3	COVID_C1	34	0.0652197	0.0298907	1.56162e-05	0.00476294	0.5606	0.124	6.15576e-06	-0.0067646	0.13777	0.960839	Yes	upstream_gene_variant
9:133165340:C:G	rs9411461	ABO.9253.52.3	COVID_C1	34	0.0652197	0.0298907	1.56162e-05	0.00476294	-0.1656	0.028	3.33319e-09	0.012614	0.021904	0.564699	Yes	upstream_gene_variant
9:133165512:C:A	rs7044834	ABO.9253.52.3	COVID_C1	34	0.0652197	0.0298907	1.56162e-05	0.00476294	-0.2538	0.0385	4.33334e-11	-0.034208	0.025506	0.179864	Yes	upstream_gene_variant
9:133183922:G:A	rs60526253	ABO.9253.52.3	COVID_C1	34	0.0652197	0.0298907	1.56162e-05	0.00476294	-0.3173	0.0372	1.46893e-17	-0.051159	0.025325	0.0433731	Yes	intergenic_variant
9:133203795:G:A	rs11244033	ABO.9253.52.3	COVID_C1	34	0.0652197	0.0298907	1.56162e-05	0.00476294	0.3777	0.0258	1.5714e-48	-0.0011904	0.016793	0.943488	Yes	downstream_gene_variant
9:133205125:A:C	rs149189328	ABO.9253.52.3	COVID_C1	34	0.0652197	0.0298907	1.56162e-05	0.00476294	0.8224	0.0863	1.57969e-21	0.016747	0.063063	0.790578	Yes	downstream_gene_variant
9:133211179:TG:T	rs782108791	ABO.9253.52.3	COVID_C1	34	0.0652197	0.0298907	1.56162e-05	0.00476294	-0.3558	0.0418	1.71015e-17	0.0088114	0.032859	0.788578	Yes	upstream_gene_variant
9:133230925:G:T	rs112785592	ABO.9253.52.3	COVID_C1	34	0.0652197	0.0298907	1.56162e-05	0.00476294	-0.561	0.1197	2.77623e-06	0.38544	0.16944	0.0229187	Yes	upstream_gene_variant
9:133231250:G:A	rs137987574	ABO.9253.52.3	COVID_C1	34	0.0652197	0.0298907	1.56162e-05	0.00476294	-0.5212	0.0986	1.25017e-07	0.031124	0.095324	0.74404	Yes	upstream_gene_variant
9:133239032:G:A	rs142599019	ABO.9253.52.3	COVID_C1	34	0.0652197	0.0298907	1.56162e-05	0.00476294	-0.5295	0.1167	5.69858e-06	0.11094	0.10191	0.276327	Yes	regulatory_region_variant
9:133246236:C:T	rs145526382	ABO.9253.52.3	COVID_C1	34	0.0652197	0.0298907	1.56162e-05	0.00476294	0.8842	0.0755	1.11611e-31	0.066913	0.052247	0.200297	Yes	downstream_gene_variant
9:133255963:G:T	rs8176744	ABO.9253.52.3	COVID_C1	34	0.0652197	0.0298907	1.56162e-05	0.00476294	-0.5209	0.0598	3.01998e-18	-0.071308	0.048605	0.142351	Yes	non_coding_transcript_exon_variant
9:133257521:T:TC	rs8176719	ABO.9253.52.3	COVID_C1	34	0.0652197	0.0298907	1.56162e-05	0.00476294	1.2044	0.0158	0	0.091631	0.018929	1.29335e-06	Yes	frameshift_variant
9:133284592:G:A	rs146174278	ABO.9253.52.3	COVID_C1	34	0.0652197	0.0298907	1.56162e-05	0.00476294	-0.5686	0.1215	2.87105e-06	-0.081907	0.11332	0.469807	Yes	intergenic_variant
9:133286683:T:C	rs68032997	ABO.9253.52.3	COVID_C1	34	0.0652197	0.0298907	1.56162e-05	0.00476294	-0.4887	0.0626	5.87005e-15	0.032582	0.036413	0.370899	Yes	regulatory_region_variant
9:133291776:AG:A	rs199659153	ABO.9253.52.3	COVID_C1	34	0.0652197	0.0298907	1.56162e-05	0.00476294	-0.455	0.0724	3.28846e-10	-0.015379	0.065715	0.814965	Yes	intergenic_variant
9:133294153:A:C	rs116851371	ABO.9253.52.3	COVID_C1	34	0.0652197	0.0298907	1.56162e-05	0.00476294	1.0094	0.1733	5.72558e-09	-0.24456	0.28096	0.384058	Yes	intergenic_variant
9:133295160:G:A	rs7869258	ABO.9253.52.3	COVID_C1	34	0.0652197	0.0298907	1.56162e-05	0.00476294	0.4292	0.0246	3.61814e-68	0.013494	0.016213	0.405242	Yes	intergenic_variant
9:133319751:C:T	rs12683804	ABO.9253.52.3	COVID_C1	34	0.0652197	0.0298907	1.56162e-05	0.00476294	-0.2884	0.029	2.65634e-23	-0.0017843	0.019779	0.928119	Yes	downstream_gene_variant
9:133321580:C:T	rs79518626	ABO.9253.52.3	COVID_C1	34	0.0652197	0.0298907	1.56162e-05	0.00476294	0.7864	0.0566	6.88856e-44	0.046483	0.032485	0.152457	Yes	downstream_gene_variant
9:133326519:G:A	rs76771223	ABO.9253.52.3	COVID_C1	34	0.0652197	0.0298907	1.56162e-05	0.00476294	-0.3461	0.0405	1.27783e-17	-0.075292	0.04626	0.103613	Yes	downstream_gene_variant
9:133341592:C:T	rs78711238	ABO.9253.52.3	COVID_C1	34	0.0652197	0.0298907	1.56162e-05	0.00476294	1.149	0.1038	1.7665e-28	0.035597	0.069934	0.610746	Yes	synonymous_variant
9:133356757:CAGGGGAG:C	rs587680893	ABO.9253.52.3	COVID_C1	34	0.0652197	0.0298907	1.56162e-05	0.00476294	0.898	0.0698	7.05405e-38	-0.081648	0.080221	0.308779	Yes	intron_variant
9:133412734:G:A	rs2285488	ABO.9253.52.3	COVID_C1	34	0.0652197	0.0298907	1.56162e-05	0.00476294	-0.3874	0.0313	3.48127e-35	-0.033318	0.021908	0.128306	Yes	intron_variant
9:133470606:C:A	rs149166186	ABO.9253.52.3	COVID_C1	34	0.0652197	0.0298907	1.56162e-05	0.00476294	1.1558	0.233	7.03065e-07	0.29605	0.23514	0.208017	No	3_prime_UTR_variant
9:133471682:C:T	rs41307428	ABO.9253.52.3	COVID_C1	34	0.0652197	0.0298907	1.56162e-05	0.00476294	0.4277	0.0811	1.33674e-07	0.044709	0.05152	0.385504	Yes	3_prime_UTR_variant
9:133479288:G:GC	rs11454477	ABO.9253.52.3	COVID_C1	34	0.0652197	0.0298907	1.56162e-05	0.00476294	-0.8466	0.0565	9.33216e-51	-0.069483	0.05666	0.22008	Yes	upstream_gene_variant
9:133482710:T:C	rs72779222	ABO.9253.52.3	COVID_C1	34	0.0652197	0.0298907	1.56162e-05	0.00476294	-0.316	0.0514	7.85353e-10	0.022896	0.040365	0.570562	Yes	upstream_gene_variant
9:133483093:A:G	rs34108489	ABO.9253.52.3	COVID_C1	34	0.0652197	0.0298907	1.56162e-05	0.00476294	0.1419	0.0287	7.64372e-07	0.022349	0.020899	0.284898	Yes	upstream_gene_variant
9:133509774:G:A	rs28463601	ABO.9253.52.3	COVID_C1	34	0.0652197	0.0298907	1.56162e-05	0.00476294	0.2333	0.0449	2.03632e-07	0.10124	0.033732	0.00268826	Yes	downstream_gene_variant
9:133517594:A:G	rs9802874	ABO.9253.52.3	COVID_C1	34	0.0652197	0.0298907	1.56162e-05	0.00476294	-0.3243	0.0259	5.71387e-36	0.003984	0.019615	0.839049	Yes	intron_variant
9:133536945:G:T	rs28569945	ABO.9253.52.3	COVID_C1	34	0.0652197	0.0298907	1.56162e-05	0.00476294	-0.3032	0.0308	7.26465e-23	-0.019525	0.018467	0.290379	Yes	intron_variant
9:133540399:G:A	rs55750924	ABO.9253.52.3	COVID_C1	34	0.0652197	0.0298907	1.56162e-05	0.00476294	-0.2647	0.0491	7.00516e-08	-0.011073	0.0331	0.737978	Yes	intron_variant
9:133086422:T:C	rs679779	ABO.9253.52.3	COVID_C2	34	0.0739725	0.0298907	1.56162e-05	0.00476294	-0.1375	0.0286	1.52683e-06	-0.0018186	0.019837	0.926955	Yes	non_coding_transcript_exon_variant
9:133155928:T:C	rs117595304	ABO.9253.52.3	COVID_C2	34	0.0739725	0.0298907	1.56162e-05	0.00476294	0.8535	0.1921	8.87138e-06	0.082428	0.13195	0.532174	No	missense_variant (but not missense for ABO)
9:133156531:G:A	rs7027827	ABO.9253.52.3	COVID_C2	34	0.0739725	0.0298907	1.56162e-05	0.00476294	0.2975	0.0308	4.49838e-22	0.038534	0.019292	0.0457809	Yes	intron_variant
9:133164763:C:T	rs34394935	ABO.9253.52.3	COVID_C2	34	0.0739725	0.0298907	1.56162e-05	0.00476294	0.5606	0.124	6.15576e-06	-0.02259	0.1269	0.858712	Yes	upstream_gene_variant
9:133165340:C:G	rs9411461	ABO.9253.52.3	COVID_C2	34	0.0739725	0.0298907	1.56162e-05	0.00476294	-0.1656	0.028	3.33319e-09	0.012919	0.017345	0.456377	Yes	upstream_gene_variant
9:133165512:C:A	rs7044834	ABO.9253.52.3	COVID_C2	34	0.0739725	0.0298907	1.56162e-05	0.00476294	-0.2538	0.0385	4.33334e-11	-0.029758	0.021948	0.17515	Yes	upstream_gene_variant
9:133183922:G:A	rs60526253	ABO.9253.52.3	COVID_C2	34	0.0739725	0.0298907	1.56162e-05	0.00476294	-0.3173	0.0372	1.46893e-17	-0.047066	0.020488	0.0216047	Yes	intergenic_variant
9:133203795:G:A	rs11244033	ABO.9253.52.3	COVID_C2	34	0.0739725	0.0298907	1.56162e-05	0.00476294	0.3777	0.0258	1.5714e-48	0.006862	0.014464	0.635201	Yes	downstream_gene_variant
9:133205125:A:C	rs149189328	ABO.9253.52.3	COVID_C2	34	0.0739725	0.0298907	1.56162e-05	0.00476294	0.8224	0.0863	1.57969e-21	0.02605	0.056149	0.642688	Yes	downstream_gene_variant
9:133211179:TG:T	rs782108791	ABO.9253.52.3	COVID_C2	34	0.0739725	0.0298907	1.56162e-05	0.00476294	-0.3558	0.0418	1.71015e-17	-0.0042559	0.027092	0.875173	Yes	upstream_gene_variant
9:133230925:G:T	rs112785592	ABO.9253.52.3	COVID_C2	34	0.0739725	0.0298907	1.56162e-05	0.00476294	-0.561	0.1197	2.77623e-06	0.1784	0.10202	0.0803469	Yes	upstream_gene_variant
9:133231250:G:A	rs137987574	ABO.9253.52.3	COVID_C2	34	0.0739725	0.0298907	1.56162e-05	0.00476294	-0.5212	0.0986	1.25017e-07	-0.027317	0.077759	0.725361	Yes	upstream_gene_variant
9:133239032:G:A	rs142599019	ABO.9253.52.3	COVID_C2	34	0.0739725	0.0298907	1.56162e-05	0.00476294	-0.5295	0.1167	5.69858e-06	0.038533	0.086481	0.655911	Yes	regulatory_region_variant
9:133246236:C:T	rs145526382	ABO.9253.52.3	COVID_C2	34	0.0739725	0.0298907	1.56162e-05	0.00476294	0.8842	0.0755	1.11611e-31	0.045655	0.043151	0.290042	Yes	downstream_gene_variant
9:133255963:G:T	rs8176744	ABO.9253.52.3	COVID_C2	34	0.0739725	0.0298907	1.56162e-05	0.00476294	-0.5209	0.0598	3.01998e-18	-0.06667	0.040761	0.101917	Yes	non_coding_transcript_exon_variant
9:133257521:T:TC	rs8176719	ABO.9253.52.3	COVID_C2	34	0.0739725	0.0298907	1.56162e-05	0.00476294	1.2044	0.0158	0	0.10032	0.015491	9.41746e-11	Yes	frameshift_variant
9:133284592:G:A	rs146174278	ABO.9253.52.3	COVID_C2	34	0.0739725	0.0298907	1.56162e-05	0.00476294	-0.5686	0.1215	2.87105e-06	-0.07642	0.092936	0.410914	Yes	intergenic_variant
9:133286683:T:C	rs68032997	ABO.9253.52.3	COVID_C2	34	0.0739725	0.0298907	1.56162e-05	0.00476294	-0.4887	0.0626	5.87005e-15	0.00080772	0.031738	0.979696	Yes	regulatory_region_variant
9:133291776:AG:A	rs199659153	ABO.9253.52.3	COVID_C2	34	0.0739725	0.0298907	1.56162e-05	0.00476294	-0.455	0.0724	3.28846e-10	-0.01367	0.054207	0.800901	Yes	intergenic_variant
9:133294153:A:C	rs116851371	ABO.9253.52.3	COVID_C2	34	0.0739725	0.0298907	1.56162e-05	0.00476294	1.0094	0.1733	5.72558e-09	-0.10667	0.15972	0.504225	Yes	intergenic_variant
9:133295160:G:A	rs7869258	ABO.9253.52.3	COVID_C2	34	0.0739725	0.0298907	1.56162e-05	0.00476294	0.4292	0.0246	3.61814e-68	0.017874	0.01375	0.193626	Yes	intergenic_variant
9:133319751:C:T	rs12683804	ABO.9253.52.3	COVID_C2	34	0.0739725	0.0298907	1.56162e-05	0.00476294	-0.2884	0.029	2.65634e-23	-0.012525	0.016598	0.450484	Yes	downstream_gene_variant
9:133321580:C:T	rs79518626	ABO.9253.52.3	COVID_C2	34	0.0739725	0.0298907	1.56162e-05	0.00476294	0.7864	0.0566	6.88856e-44	0.044218	0.027714	0.110598	Yes	downstream_gene_variant
9:133326519:G:A	rs76771223	ABO.9253.52.3	COVID_C2	34	0.0739725	0.0298907	1.56162e-05	0.00476294	-0.3461	0.0405	1.27783e-17	0.01158	0.040116	0.772839	Yes	downstream_gene_variant
9:133341592:C:T	rs78711238	ABO.9253.52.3	COVID_C2	34	0.0739725	0.0298907	1.56162e-05	0.00476294	1.149	0.1038	1.7665e-28	0.058339	0.059952	0.330506	Yes	synonymous_variant
9:133356757:CAGGGGAG:C	rs587680893	ABO.9253.52.3	COVID_C2	34	0.0739725	0.0298907	1.56162e-05	0.00476294	0.898	0.0698	7.05405e-38	-0.029362	0.061076	0.630698	Yes	intron_variant
9:133412734:G:A	rs2285488	ABO.9253.52.3	COVID_C2	34	0.0739725	0.0298907	1.56162e-05	0.00476294	-0.3874	0.0313	3.48127e-35	-0.03327	0.018623	0.0740182	Yes	intron_variant
9:133471682:C:T	rs41307428	ABO.9253.52.3	COVID_C2	34	0.0739725	0.0298907	1.56162e-05	0.00476294	0.4277	0.0811	1.33674e-07	0.026349	0.041626	0.526738	Yes	3_prime_UTR_variant
9:133482710:T:C	rs72779222	ABO.9253.52.3	COVID_C2	34	0.0739725	0.0298907	1.56162e-05	0.00476294	-0.316	0.0514	7.85353e-10	0.0075791	0.031634	0.81065	Yes	upstream_gene_variant
9:133483093:A:G	rs34108489	ABO.9253.52.3	COVID_C2	34	0.0739725	0.0298907	1.56162e-05	0.00476294	0.1419	0.0287	7.64372e-07	0.0081811	0.017144	0.63322	Yes	upstream_gene_variant
9:133509774:G:A	rs28463601	ABO.9253.52.3	COVID_C2	34	0.0739725	0.0298907	1.56162e-05	0.00476294	0.2333	0.0449	2.03632e-07	0.067744	0.027503	0.0137722	Yes	downstream_gene_variant
9:133517594:A:G	rs9802874	ABO.9253.52.3	COVID_C2	34	0.0739725	0.0298907	1.56162e-05	0.00476294	-0.3243	0.0259	5.71387e-36	5.356e-05	0.016118	0.997349	Yes	intron_variant
9:133536945:G:T	rs28569945	ABO.9253.52.3	COVID_C2	34	0.0739725	0.0298907	1.56162e-05	0.00476294	-0.3032	0.0308	7.26465e-23	-0.022149	0.01634	0.175256	Yes	intron_variant
9:133540399:G:A	rs55750924	ABO.9253.52.3	COVID_C2	34	0.0739725	0.0298907	1.56162e-05	0.00476294	-0.2647	0.0491	7.00516e-08	-0.0092729	0.028756	0.747098	Yes	intron_variant
19:10020725:T:C	rs2233796	ICAM1.4342.10.3	COVID_A2	38	0.0809463	0.0223853	0.000299143	0.0456193	-0.4332	0.0925	2.82371e-06	0.12016	0.14869	0.419019	Yes	synonymous_variant
19:10032024:C:A	rs11671270	ICAM1.4342.10.3	COVID_A2	38	0.0809463	0.0223853	0.000299143	0.0456193	-0.1869	0.0343	5.06596e-08	0.047159	0.050851	0.353721	Yes	intergenic_variant
19:10080866:T:C	rs5027494	ICAM1.4342.10.3	COVID_A2	38	0.0809463	0.0223853	0.000299143	0.0456193	-0.1552	0.0266	5.39241e-09	0.051196	0.038157	0.179687	Yes	intergenic_variant
19:10094559:C:T	rs80198180	ICAM1.4342.10.3	COVID_A2	38	0.0809463	0.0223853	0.000299143	0.0456193	-0.6054	0.1075	1.78517e-08	-0.26	0.23601	0.270615	Yes	non_coding_transcript_exon_variant
19:10103476:G:A	rs192542025	ICAM1.4342.10.3	COVID_A2	38	0.0809463	0.0223853	0.000299143	0.0456193	0.4438	0.0831	9.26632e-08	-0.18427	0.17059	0.280057	Yes	upstream_gene_variant
19:10119356:C:T	rs112407609	ICAM1.4342.10.3	COVID_A2	38	0.0809463	0.0223853	0.000299143	0.0456193	-0.504	0.0518	2.2519e-22	0.13936	0.083635	0.0956561	Yes	non_coding_transcript_exon_variant
19:10139286:C:T	rs79772680	ICAM1.4342.10.3	COVID_A2	38	0.0809463	0.0223853	0.000299143	0.0456193	-0.3313	0.0667	6.79908e-07	-0.11281	0.072584	0.120137	Yes	intron_variant
19:10201319:C:T	rs147728875	ICAM1.4342.10.3	COVID_A2	38	0.0809463	0.0223853	0.000299143	0.0456193	0.4251	0.0863	8.39987e-07	-0.089	0.14533	0.540274	Yes	intron_variant
19:10223426:C:T	rs183589749	ICAM1.4342.10.3	COVID_A2	38	0.0809463	0.0223853	0.000299143	0.0456193	-0.6784	0.1479	4.49913e-06	0.30405	0.31419	0.333181	No	intron_variant
19:10225247:A:G	rs74179903	ICAM1.4342.10.3	COVID_A2	38	0.0809463	0.0223853	0.000299143	0.0456193	-0.4284	0.0545	3.82449e-15	-0.1071	0.089327	0.230541	Yes	intron_variant
19:10273947:A:G	rs5030348	ICAM1.4342.10.3	COVID_A2	38	0.0809463	0.0223853	0.000299143	0.0456193	0.2749	0.0249	2.44595e-28	-0.031346	0.038306	0.413183	Yes	intron_variant
19:10279106:G:T	rs76923681	ICAM1.4342.10.3	COVID_A2	38	0.0809463	0.0223853	0.000299143	0.0456193	-0.6588	0.0858	1.61186e-14	-0.071494	0.16821	0.670816	Yes	intron_variant
19:10284355:G:A	rs3093033	ICAM1.4342.10.3	COVID_A2	38	0.0809463	0.0223853	0.000299143	0.0456193	0.5856	0.1136	2.53726e-07	0.18095	0.13121	0.167868	Yes	intron_variant
19:10284532:C:T	rs1801714	ICAM1.4342.10.3	COVID_A2	38	0.0809463	0.0223853	0.000299143	0.0456193	-0.7653	0.0704	1.58909e-27	0.12729	0.10922	0.243839	Yes	missense_variant
19:10285007:A:G	rs5498	ICAM1.4342.10.3	COVID_A2	38	0.0809463	0.0223853	0.000299143	0.0456193	-1.1988	0.0136	0	-0.096651	0.027895	0.000530597	Yes	missense_variant
19:10285093:G:A	rs115766769	ICAM1.4342.10.3	COVID_A2	38	0.0809463	0.0223853	0.000299143	0.0456193	-0.9245	0.1376	1.8329e-11	-0.10553	0.18398	0.566242	Yes	non_coding_transcript_exon_variant
19:10286457:C:T	rs114170067	ICAM1.4342.10.3	COVID_A2	38	0.0809463	0.0223853	0.000299143	0.0456193	0.6953	0.0551	1.66179e-36	-0.081449	0.083415	0.328851	Yes	3_prime_UTR_variant
19:10297905:G:T	rs148215750	ICAM1.4342.10.3	COVID_A2	38	0.0809463	0.0223853	0.000299143	0.0456193	0.4026	0.0575	2.52804e-12	-0.056033	0.064315	0.38363	Yes	downstream_gene_variant
19:10300761:A:G	rs112138598	ICAM1.4342.10.3	COVID_A2	38	0.0809463	0.0223853	0.000299143	0.0456193	0.4278	0.0571	6.77704e-14	0.13899	0.090736	0.12557	Yes	downstream_gene_variant
19:10301733:G:A	rs140735577	ICAM1.4342.10.3	COVID_A2	38	0.0809463	0.0223853	0.000299143	0.0456193	0.5831	0.0482	1.08863e-33	0.22701	0.08514	0.0076688	Yes	downstream_gene_variant
19:10306201:C:T	rs11882594	ICAM1.4342.10.3	COVID_A2	38	0.0809463	0.0223853	0.000299143	0.0456193	0.4364	0.0465	6.29485e-21	0.042877	0.069604	0.537886	Yes	intron_variant
19:10317208:G:A	rs113337445	ICAM1.4342.10.3	COVID_A2	38	0.0809463	0.0223853	0.000299143	0.0456193	0.5697	0.0912	4.19187e-10	0.20911	0.14586	0.151676	Yes	3_prime_UTR_variant
19:10324188:G:A	rs78439352	ICAM1.4342.10.3	COVID_A2	38	0.0809463	0.0223853	0.000299143	0.0456193	-0.4454	0.0559	1.61524e-15	-0.060541	0.061901	0.32806	Yes	intron_variant
19:10330063:C:T	rs3181050	ICAM1.4342.10.3	COVID_A2	38	0.0809463	0.0223853	0.000299143	0.0456193	0.3991	0.0511	5.71081e-15	0.081536	0.072492	0.260691	Yes	intron_variant
19:10337759:G:C	rs148996243	ICAM1.4342.10.3	COVID_A2	38	0.0809463	0.0223853	0.000299143	0.0456193	-0.749	0.1153	8.24304e-11	0.050178	0.20435	0.806031	Yes	intron_variant
19:10347871:G:T	rs510506	ICAM1.4342.10.3	COVID_A2	38	0.0809463	0.0223853	0.000299143	0.0456193	0.3622	0.0337	6.07087e-27	0.10272	0.037124	0.00565846	Yes	downstream_gene_variant
19:10365316:C:A	rs192036904	ICAM1.4342.10.3	COVID_A2	38	0.0809463	0.0223853	0.000299143	0.0456193	-0.8915	0.1794	6.71804e-07	0.14934	0.33046	0.65133	No	intron_variant
19:10373177:C:T	rs566948570	ICAM1.4342.10.3	COVID_A2	38	0.0809463	0.0223853	0.000299143	0.0456193	0.7778	0.143	5.35321e-08	0.19728	0.35615	0.579631	No	intron_variant
19:10456649:C:T	rs143756038	ICAM1.4342.10.3	COVID_A2	38	0.0809463	0.0223853	0.000299143	0.0456193	-0.6283	0.0993	2.49503e-10	0.13703	0.17305	0.428447	Yes	intron_variant
19:10482464:T:TC	rs56839405	ICAM1.4342.10.3	COVID_A2	38	0.0809463	0.0223853	0.000299143	0.0456193	0.2309	0.0269	9.19148e-18	-0.0040394	0.039793	0.919145	Yes	downstream_gene_variant
19:10485452:A:C	rs62131890	ICAM1.4342.10.3	COVID_A2	38	0.0809463	0.0223853	0.000299143	0.0456193	-0.4738	0.0498	1.8337e-21	-0.088586	0.0837	0.289884	Yes	downstream_gene_variant
19:10520145:T:C	rs79016212	ICAM1.4342.10.3	COVID_A2	38	0.0809463	0.0223853	0.000299143	0.0456193	0.4274	0.0939	5.32267e-06	0.11219	0.16268	0.490423	Yes	upstream_gene_variant
19:10597216:A:G	rs4804512	ICAM1.4342.10.3	COVID_A2	38	0.0809463	0.0223853	0.000299143	0.0456193	-0.152	0.0294	2.34009e-07	-0.019757	0.04184	0.636781	Yes	downstream_gene_variant
19:10608379:G:A	rs148688267	ICAM1.4342.10.3	COVID_A2	38	0.0809463	0.0223853	0.000299143	0.0456193	-0.617	0.1132	5.02199e-08	-0.14218	0.22766	0.532281	Yes	intron_variant
19:10640375:G:C	rs117419803	ICAM1.4342.10.3	COVID_A2	38	0.0809463	0.0223853	0.000299143	0.0456193	-0.4013	0.0737	5.17916e-08	0.060961	0.071443	0.393503	Yes	intron_variant
19:10835740:C:T	rs73007599	ICAM1.4342.10.3	COVID_A2	38	0.0809463	0.0223853	0.000299143	0.0456193	0.1505	0.0322	2.95514e-06	0.039981	0.048328	0.408076	Yes	intron_variant
19:11003676:A:G	rs12983316	ICAM1.4342.10.3	COVID_A2	38	0.0809463	0.0223853	0.000299143	0.0456193	-0.2232	0.0332	1.78153e-11	-0.059901	0.038435	0.119114	Yes	intron_variant
19:9985006:T:C	rs8103054	ICAM1.4342.10.3	COVID_A2	38	0.0809463	0.0223853	0.000299143	0.0456193	-0.203	0.0396	2.9555e-07	0.019981	0.043876	0.648824	Yes	intron_variant
19:10020725:T:C	rs2233796	ICAM1.4342.10.3	COVID_B2	38	0.0432798	0.0223853	0.000299143	0.0456193	-0.4332	0.0925	2.82371e-06	-0.069966	0.096583	0.468812	Yes	synonymous_variant
19:10032024:C:A	rs11671270	ICAM1.4342.10.3	COVID_B2	38	0.0432798	0.0223853	0.000299143	0.0456193	-0.1869	0.0343	5.06596e-08	0.0099348	0.034105	0.770822	Yes	intergenic_variant
19:10080866:T:C	rs5027494	ICAM1.4342.10.3	COVID_B2	38	0.0432798	0.0223853	0.000299143	0.0456193	-0.1552	0.0266	5.39241e-09	0.015418	0.026998	0.567946	Yes	intergenic_variant
19:10094559:C:T	rs80198180	ICAM1.4342.10.3	COVID_B2	38	0.0432798	0.0223853	0.000299143	0.0456193	-0.6054	0.1075	1.78517e-08	-0.17036	0.17177	0.321299	Yes	non_coding_transcript_exon_variant
19:10103476:G:A	rs192542025	ICAM1.4342.10.3	COVID_B2	38	0.0432798	0.0223853	0.000299143	0.0456193	0.4438	0.0831	9.26632e-08	0.005937	0.11136	0.957482	Yes	upstream_gene_variant
19:10119356:C:T	rs112407609	ICAM1.4342.10.3	COVID_B2	38	0.0432798	0.0223853	0.000299143	0.0456193	-0.504	0.0518	2.2519e-22	0.039642	0.057928	0.493765	Yes	non_coding_transcript_exon_variant
19:10139286:C:T	rs79772680	ICAM1.4342.10.3	COVID_B2	38	0.0432798	0.0223853	0.000299143	0.0456193	-0.3313	0.0667	6.79908e-07	-0.13587	0.059181	0.0216851	Yes	intron_variant
19:10148229:G:A	rs6511610	ICAM1.4342.10.3	COVID_B2	38	0.0432798	0.0223853	0.000299143	0.0456193	0.2955	0.0256	8.01117e-31	-0.034569	0.027856	0.21461	Yes	intron_variant
19:10201319:C:T	rs147728875	ICAM1.4342.10.3	COVID_B2	38	0.0432798	0.0223853	0.000299143	0.0456193	0.4251	0.0863	8.39987e-07	-0.1997	0.095188	0.0359093	Yes	intron_variant
19:10223426:C:T	rs183589749	ICAM1.4342.10.3	COVID_B2	38	0.0432798	0.0223853	0.000299143	0.0456193	-0.6784	0.1479	4.49913e-06	0.13202	0.23895	0.580605	No	intron_variant
19:10225247:A:G	rs74179903	ICAM1.4342.10.3	COVID_B2	38	0.0432798	0.0223853	0.000299143	0.0456193	-0.4284	0.0545	3.82449e-15	0.077096	0.057876	0.182831	Yes	intron_variant
19:10273947:A:G	rs5030348	ICAM1.4342.10.3	COVID_B2	38	0.0432798	0.0223853	0.000299143	0.0456193	0.2749	0.0249	2.44595e-28	-0.03247	0.025208	0.197717	Yes	intron_variant
19:10279106:G:T	rs76923681	ICAM1.4342.10.3	COVID_B2	38	0.0432798	0.0223853	0.000299143	0.0456193	-0.6588	0.0858	1.61186e-14	0.031368	0.11331	0.781908	Yes	intron_variant
19:10284355:G:A	rs3093033	ICAM1.4342.10.3	COVID_B2	38	0.0432798	0.0223853	0.000299143	0.0456193	0.5856	0.1136	2.53726e-07	0.24361	0.1089	0.0252859	Yes	intron_variant
19:10284532:C:T	rs1801714	ICAM1.4342.10.3	COVID_B2	38	0.0432798	0.0223853	0.000299143	0.0456193	-0.7653	0.0704	1.58909e-27	0.088069	0.07252	0.224591	Yes	missense_variant
19:10285007:A:G	rs5498	ICAM1.4342.10.3	COVID_B2	38	0.0432798	0.0223853	0.000299143	0.0456193	-1.1988	0.0136	0	-0.048706	0.020999	0.020371	Yes	missense_variant
19:10285093:G:A	rs115766769	ICAM1.4342.10.3	COVID_B2	38	0.0432798	0.0223853	0.000299143	0.0456193	-0.9245	0.1376	1.8329e-11	-0.064014	0.13688	0.640024	Yes	non_coding_transcript_exon_variant
19:10286457:C:T	rs114170067	ICAM1.4342.10.3	COVID_B2	38	0.0432798	0.0223853	0.000299143	0.0456193	0.6953	0.0551	1.66179e-36	-0.062769	0.054321	0.247878	Yes	3_prime_UTR_variant
19:10297905:G:T	rs148215750	ICAM1.4342.10.3	COVID_B2	38	0.0432798	0.0223853	0.000299143	0.0456193	0.4026	0.0575	2.52804e-12	-0.051882	0.050113	0.300529	Yes	downstream_gene_variant
19:10300761:A:G	rs112138598	ICAM1.4342.10.3	COVID_B2	38	0.0432798	0.0223853	0.000299143	0.0456193	0.4278	0.0571	6.77704e-14	0.042909	0.064727	0.50738	Yes	downstream_gene_variant
19:10301733:G:A	rs140735577	ICAM1.4342.10.3	COVID_B2	38	0.0432798	0.0223853	0.000299143	0.0456193	0.5831	0.0482	1.08863e-33	0.088355	0.061706	0.152181	Yes	downstream_gene_variant
19:10306201:C:T	rs11882594	ICAM1.4342.10.3	COVID_B2	38	0.0432798	0.0223853	0.000299143	0.0456193	0.4364	0.0465	6.29485e-21	0.014719	0.043794	0.736798	Yes	intron_variant
19:10317208:G:A	rs113337445	ICAM1.4342.10.3	COVID_B2	38	0.0432798	0.0223853	0.000299143	0.0456193	0.5697	0.0912	4.19187e-10	0.10785	0.098959	0.275781	Yes	3_prime_UTR_variant
19:10324188:G:A	rs78439352	ICAM1.4342.10.3	COVID_B2	38	0.0432798	0.0223853	0.000299143	0.0456193	-0.4454	0.0559	1.61524e-15	-0.062311	0.045864	0.174272	Yes	intron_variant
19:10330063:C:T	rs3181050	ICAM1.4342.10.3	COVID_B2	38	0.0432798	0.0223853	0.000299143	0.0456193	0.3991	0.0511	5.71081e-15	0.033169	0.048924	0.497791	Yes	intron_variant
19:10337759:G:C	rs148996243	ICAM1.4342.10.3	COVID_B2	38	0.0432798	0.0223853	0.000299143	0.0456193	-0.749	0.1153	8.24304e-11	-0.097527	0.15522	0.529798	Yes	intron_variant
19:10347871:G:T	rs510506	ICAM1.4342.10.3	COVID_B2	38	0.0432798	0.0223853	0.000299143	0.0456193	0.3622	0.0337	6.07087e-27	0.015545	0.027378	0.570176	Yes	downstream_gene_variant
19:10456649:C:T	rs143756038	ICAM1.4342.10.3	COVID_B2	38	0.0432798	0.0223853	0.000299143	0.0456193	-0.6283	0.0993	2.49503e-10	0.17265	0.12226	0.157904	Yes	intron_variant
19:10482464:T:TC	rs56839405	ICAM1.4342.10.3	COVID_B2	38	0.0432798	0.0223853	0.000299143	0.0456193	0.2309	0.0269	9.19148e-18	-0.0017698	0.029952	0.952882	Yes	downstream_gene_variant
19:10485452:A:C	rs62131890	ICAM1.4342.10.3	COVID_B2	38	0.0432798	0.0223853	0.000299143	0.0456193	-0.4738	0.0498	1.8337e-21	-0.14069	0.055866	0.0117907	Yes	downstream_gene_variant
19:10520145:T:C	rs79016212	ICAM1.4342.10.3	COVID_B2	38	0.0432798	0.0223853	0.000299143	0.0456193	0.4274	0.0939	5.32267e-06	0.11056	0.10749	0.303686	Yes	upstream_gene_variant
19:10597216:A:G	rs4804512	ICAM1.4342.10.3	COVID_B2	38	0.0432798	0.0223853	0.000299143	0.0456193	-0.152	0.0294	2.34009e-07	-0.036387	0.030877	0.238617	Yes	downstream_gene_variant
19:10608379:G:A	rs148688267	ICAM1.4342.10.3	COVID_B2	38	0.0432798	0.0223853	0.000299143	0.0456193	-0.617	0.1132	5.02199e-08	0.12667	0.16831	0.451691	Yes	intron_variant
19:10640375:G:C	rs117419803	ICAM1.4342.10.3	COVID_B2	38	0.0432798	0.0223853	0.000299143	0.0456193	-0.4013	0.0737	5.17916e-08	0.014956	0.055146	0.786232	Yes	intron_variant
19:10835740:C:T	rs73007599	ICAM1.4342.10.3	COVID_B2	38	0.0432798	0.0223853	0.000299143	0.0456193	0.1505	0.0322	2.95514e-06	0.036419	0.033705	0.27991	Yes	intron_variant
19:11003676:A:G	rs12983316	ICAM1.4342.10.3	COVID_B2	38	0.0432798	0.0223853	0.000299143	0.0456193	-0.2232	0.0332	1.78153e-11	-0.012628	0.029298	0.666454	Yes	intron_variant
19:9985006:T:C	rs8103054	ICAM1.4342.10.3	COVID_B2	38	0.0432798	0.0223853	0.000299143	0.0456193	-0.203	0.0396	2.9555e-07	0.049691	0.031552	0.115281	Yes	intron_variant
10:88773786:C:T	rs303468	FAS.9459.7.3	COVID_A2	11	0.204151	0.0662352	0.00205465	0.208889	-0.2292	0.0518	9.65717e-06	-0.076543	0.073387	0.296946	Yes	Not assessed
10:88807037:A:G	rs303529	FAS.9459.7.3	COVID_A2	11	0.204151	0.0662352	0.00205465	0.208889	-0.5317	0.0967	3.83147e-08	-0.073905	0.12865	0.565653	Yes	Not assessed
10:88824634:G:A	rs139740751	FAS.9459.7.3	COVID_A2	11	0.204151	0.0662352	0.00205465	0.208889	-0.4827	0.093	2.0993e-07	-0.01118	0.11723	0.924022	Yes	Not assessed
10:88826771:G:A	rs183337847	FAS.9459.7.3	COVID_A2	11	0.204151	0.0662352	0.00205465	0.208889	-0.5224	0.1173	8.44668e-06	-0.32429	0.1446	0.0249181	Yes	Not assessed
10:88842660:A:C	rs1214562	FAS.9459.7.3	COVID_A2	11	0.204151	0.0662352	0.00205465	0.208889	-0.1346	0.0257	1.62895e-07	-0.044996	0.028964	0.1203	Yes	Not assessed
10:88999045:C:T	rs186205233	FAS.9459.7.3	COVID_A2	11	0.204151	0.0662352	0.00205465	0.208889	-0.4575	0.0861	1.07487e-07	-0.13639	0.10854	0.208903	Yes	Not assessed
10:89008923:G:A	rs28362318	FAS.9459.7.3	COVID_A2	11	0.204151	0.0662352	0.00205465	0.208889	-0.7245	0.1383	1.61789e-07	0.16256	0.23887	0.496164	No	Not a missense variant or in LD with missense variants
10:89009208:A:G	rs7911226	FAS.9459.7.3	COVID_A2	11	0.204151	0.0662352	0.00205465	0.208889	-0.3632	0.0264	4.5865e-43	-0.11653	0.030053	0.000105543	Yes	Not assessed
10:89013768:G:A	rs9658771	FAS.9459.7.3	COVID_A2	11	0.204151	0.0662352	0.00205465	0.208889	-0.4224	0.0848	6.32134e-07	0.010083	0.14808	0.945713	Yes	Not assessed
10:89024178:G:C	rs7089946	FAS.9459.7.3	COVID_A2	11	0.204151	0.0662352	0.00205465	0.208889	-0.2091	0.025	6.06269e-17	0.0079304	0.028198	0.778526	Yes	Not assessed
10:89136091:C:T	rs9651494	FAS.9459.7.3	COVID_A2	11	0.204151	0.0662352	0.00205465	0.208889	0.2495	0.0298	5.64166e-17	-0.0074819	0.044632	0.86687	Yes	Not assessed
8:11630596:G:A	rs73201424	CTSB.3061.61.2	COVID_A2	5	0.223463	0.0751996	0.00296254	0.225894	-0.2322	0.0471	8.22564e-07	-0.067179	0.066789	0.314493	Yes	Not assessed
8:11640604:A:C	rs12674847	CTSB.3061.61.2	COVID_A2	5	0.223463	0.0751996	0.00296254	0.225894	-0.1304	0.0278	2.72342e-06	-0.029901	0.040664	0.462145	Yes	Not assessed
8:11795641:T:C	rs7845566	CTSB.3061.61.2	COVID_A2	5	0.223463	0.0751996	0.00296254	0.225894	-0.1815	0.0324	2.12074e-08	0.002761	0.051363	0.957131	Yes	Not assessed
8:11847939:G:A	rs1692819	CTSB.3061.61.2	COVID_A2	5	0.223463	0.0751996	0.00296254	0.225894	0.4246	0.0274	3.67165e-54	0.097135	0.031766	0.00222947	Yes	Not assessed
8:11910694:G:T	rs146943626	CTSB.3061.61.2	COVID_A2	5	0.223463	0.0751996	0.00296254	0.225894	0.3731	0.0703	1.11289e-07	0.02658	0.11145	0.811499	Yes	Not assessed
8:11630596:G:A	rs73201424	CTSB.3061.61.2	COVID_B2	5	0.134156	0.0751996	0.00296254	0.225894	-0.2322	0.0471	8.22564e-07	0.030397	0.044955	0.498936	Yes	Not assessed
8:11640604:A:C	rs12674847	CTSB.3061.61.2	COVID_B2	5	0.134156	0.0751996	0.00296254	0.225894	-0.1304	0.0278	2.72342e-06	-0.062312	0.027344	0.0226779	Yes	Not assessed
8:11795641:T:C	rs7845566	CTSB.3061.61.2	COVID_B2	5	0.134156	0.0751996	0.00296254	0.225894	-0.1815	0.0324	2.12074e-08	-0.031897	0.034727	0.358353	Yes	Not assessed
8:11847939:G:A	rs1692819	CTSB.3061.61.2	COVID_B2	5	0.134156	0.0751996	0.00296254	0.225894	0.4246	0.0274	3.67165e-54	0.060978	0.024474	0.012719	Yes	Not assessed
8:11910694:G:T	rs146943626	CTSB.3061.61.2	COVID_B2	5	0.134156	0.0751996	0.00296254	0.225894	0.3731	0.0703	1.11289e-07	0.007693	0.074675	0.917947	Yes	Not assessed
10:88807037:A:G	rs303529	FAS.5392.73.2	COVID_A2	9	0.205727	0.0721407	0.00434801	0.265229	-0.4809	0.0968	6.76556e-07	-0.073905	0.12865	0.565653	Yes	Not assessed
10:88824634:G:A	rs139740751	FAS.5392.73.2	COVID_A2	9	0.205727	0.0721407	0.00434801	0.265229	-0.4456	0.0931	1.69925e-06	-0.01118	0.11723	0.924022	Yes	Not assessed
10:88858469:T:G	rs1147603	FAS.5392.73.2	COVID_A2	9	0.205727	0.0721407	0.00434801	0.265229	0.1221	0.0259	2.4256e-06	0.063184	0.029207	0.0305168	Yes	Not assessed
10:88999045:C:T	rs186205233	FAS.5392.73.2	COVID_A2	9	0.205727	0.0721407	0.00434801	0.265229	-0.4367	0.0862	4.05995e-07	-0.13639	0.10854	0.208903	Yes	Not assessed
10:89008923:G:A	rs28362318	FAS.5392.73.2	COVID_A2	9	0.205727	0.0721407	0.00434801	0.265229	-0.7885	0.1382	1.16003e-08	0.16256	0.23887	0.496164	No	Not a missense variant or in LD with missense variants
10:89009208:A:G	rs7911226	FAS.5392.73.2	COVID_A2	9	0.205727	0.0721407	0.00434801	0.265229	-0.3192	0.0265	2.0537e-33	-0.11653	0.030053	0.000105543	Yes	Not assessed
10:89013768:G:A	rs9658771	FAS.5392.73.2	COVID_A2	9	0.205727	0.0721407	0.00434801	0.265229	-0.3878	0.0848	4.8053e-06	0.010083	0.14808	0.945713	Yes	Not assessed
10:89024178:G:C	rs7089946	FAS.5392.73.2	COVID_A2	9	0.205727	0.0721407	0.00434801	0.265229	-0.2066	0.025	1.40871e-16	0.0079304	0.028198	0.778526	Yes	Not assessed
10:89136091:C:T	rs9651494	FAS.5392.73.2	COVID_A2	9	0.205727	0.0721407	0.00434801	0.265229	0.234	0.0298	4.08316e-15	-0.0074819	0.044632	0.86687	Yes	Not assessed
2:36689759:A:AT	rs139272388	VIT.6234.74.3	COVID_D1	11	0.162108	0.0490299	0.000945357	0.287389	-0.2337	0.0391	2.27309e-09	0.0056406	0.059788	0.924836	Yes	Not assessed
2:36705350:A:T	rs10490666	VIT.6234.74.3	COVID_D1	11	0.162108	0.0490299	0.000945357	0.287389	0.3471	0.0264	1.75367e-39	0.052635	0.028834	0.0679333	Yes	Not assessed
2:36708263:C:T	rs12712516	VIT.6234.74.3	COVID_D1	11	0.162108	0.0490299	0.000945357	0.287389	-0.1771	0.0265	2.34069e-11	-0.016928	0.032089	0.597824	Yes	Not assessed
2:36713453:C:T	rs11691187	VIT.6234.74.3	COVID_D1	11	0.162108	0.0490299	0.000945357	0.287389	-0.1619	0.0256	2.54517e-10	0.0015562	0.027526	0.954915	Yes	Not assessed
2:36719648:C:T	rs76208090	VIT.6234.74.3	COVID_D1	11	0.162108	0.0490299	0.000945357	0.287389	0.2662	0.055	1.29839e-06	-0.064801	0.064249	0.313171	Yes	Not assessed
2:36742610:C:G	rs11689624	VIT.6234.74.3	COVID_D1	11	0.162108	0.0490299	0.000945357	0.287389	-0.2181	0.0408	9.01239e-08	-0.10601	0.043895	0.0157317	Yes	Not assessed
2:36750494:A:G	rs114444970	VIT.6234.74.3	COVID_D1	11	0.162108	0.0490299	0.000945357	0.287389	0.5536	0.0835	3.35823e-11	0.037791	0.10925	0.729408	Yes	Not assessed
2:36761511:C:A	rs193191365	VIT.6234.74.3	COVID_D1	11	0.162108	0.0490299	0.000945357	0.287389	0.5222	0.1069	1.03461e-06	-0.082845	0.15245	0.586838	Yes	Not assessed
2:36766152:C:T	rs78846063	VIT.6234.74.3	COVID_D1	11	0.162108	0.0490299	0.000945357	0.287389	-0.5921	0.1327	8.12194e-06	-0.23354	0.13318	0.0795048	Yes	Not assessed
2:36766797:C:A	rs1468810	VIT.6234.74.3	COVID_D1	11	0.162108	0.0490299	0.000945357	0.287389	-0.3033	0.0244	1.78899e-35	-0.053063	0.027156	0.0507005	Yes	Not assessed
2:36773813:C:G	rs140104536	VIT.6234.74.3	COVID_D1	11	0.162108	0.0490299	0.000945357	0.287389	-1.2956	0.1106	1.07695e-31	-0.20802	0.12569	0.0979196	Yes	Not assessed
1:161052103:G:C	rs12749496	FCGR2A.3309.2.2	COVID_A2	50	0.0771903	0.0284576	0.00667849	0.33949	-0.1256	0.0283	9.07301e-06	-0.034378	0.042827	0.422138	Yes	Not assessed
1:161097231:TTTTC:T	rs950925195	FCGR2A.3309.2.2	COVID_A2	50	0.0771903	0.0284576	0.00667849	0.33949	0.4138	0.0897	3.96602e-06	0.10064	0.13006	0.439051	No	Not a missense variant or in LD with missense variants
1:161207411:G:A	rs186017571	FCGR2A.3309.2.2	COVID_A2	50	0.0771903	0.0284576	0.00667849	0.33949	-0.822	0.1606	3.08292e-07	0.14467	0.31409	0.645085	No	Not a missense variant or in LD with missense variants
1:161214307:A:G	rs1136224	FCGR2A.3309.2.2	COVID_A2	50	0.0771903	0.0284576	0.00667849	0.33949	-0.2511	0.0349	6.25329e-13	-0.054409	0.052839	0.303145	Yes	Not assessed
1:161221549:C:T	rs12721035	FCGR2A.3309.2.2	COVID_A2	50	0.0771903	0.0284576	0.00667849	0.33949	0.2533	0.0528	1.6078e-06	-0.036027	0.082416	0.662013	Yes	Not assessed
1:161233981:A:T	rs149151778	FCGR2A.3309.2.2	COVID_A2	50	0.0771903	0.0284576	0.00667849	0.33949	0.409	0.0794	2.58917e-07	-0.035987	0.14471	0.803606	Yes	Not assessed
1:161240743:C:T	rs186663604	FCGR2A.3309.2.2	COVID_A2	50	0.0771903	0.0284576	0.00667849	0.33949	0.3456	0.0663	1.86142e-07	0.064598	0.13252	0.625933	Yes	Not assessed
1:161266666:A:G	rs6427580	FCGR2A.3309.2.2	COVID_A2	50	0.0771903	0.0284576	0.00667849	0.33949	0.1142	0.0254	6.92232e-06	0.004852	0.0377	0.897595	Yes	Not assessed
1:161284456:A:G	rs41270859	FCGR2A.3309.2.2	COVID_A2	50	0.0771903	0.0284576	0.00667849	0.33949	0.555	0.0865	1.39732e-10	0.25094	0.10197	0.0138581	Yes	Not assessed
1:161300146:C:T	rs142255949	FCGR2A.3309.2.2	COVID_A2	50	0.0771903	0.0284576	0.00667849	0.33949	0.4753	0.1015	2.8304e-06	0.15564	0.11105	0.161055	Yes	Not assessed
1:161312594:T:C	rs4131826	FCGR2A.3309.2.2	COVID_A2	50	0.0771903	0.0284576	0.00667849	0.33949	0.2159	0.0255	2.52515e-17	0.042387	0.039523	0.283512	Yes	Not assessed
1:161330175:A:G	rs114037282	FCGR2A.3309.2.2	COVID_A2	50	0.0771903	0.0284576	0.00667849	0.33949	0.6384	0.1398	4.95879e-06	0.10982	0.31421	0.726705	Yes	Not assessed
1:161362517:G:C	rs201210474	FCGR2A.3309.2.2	COVID_A2	50	0.0771903	0.0284576	0.00667849	0.33949	-0.7365	0.1045	1.81707e-12	0.17742	0.24706	0.47268	Yes	Not assessed
1:161380563:C:T	rs138734661	FCGR2A.3309.2.2	COVID_A2	50	0.0771903	0.0284576	0.00667849	0.33949	-0.4972	0.0505	7.16502e-23	-0.14867	0.055861	0.00778101	Yes	Not assessed
1:161405420:G:C	rs112252354	FCGR2A.3309.2.2	COVID_A2	50	0.0771903	0.0284576	0.00667849	0.33949	-0.5573	0.0612	8.53108e-20	-0.095303	0.068864	0.16638	Yes	Not assessed
1:161410911:G:C	rs143029017	FCGR2A.3309.2.2	COVID_A2	50	0.0771903	0.0284576	0.00667849	0.33949	-0.5425	0.0506	8.08204e-27	0.040451	0.072381	0.576256	Yes	Not assessed
1:161413769:A:C	rs143135133	FCGR2A.3309.2.2	COVID_A2	50	0.0771903	0.0284576	0.00667849	0.33949	0.5057	0.0743	1.00217e-11	0.010496	0.14492	0.942263	Yes	Not assessed
1:161438667:TTAAG:T	rs541041100	FCGR2A.3309.2.2	COVID_A2	50	0.0771903	0.0284576	0.00667849	0.33949	0.8119	0.1805	6.8576e-06	0.63926	0.34966	0.0675146	No	Not a missense variant or in LD with missense variants
1:161440015:G:A	rs79106728	FCGR2A.3309.2.2	COVID_A2	50	0.0771903	0.0284576	0.00667849	0.33949	0.3154	0.0525	1.88268e-09	-0.084565	0.059373	0.154359	Yes	Not assessed
1:161483076:G:T	rs71639066	FCGR2A.3309.2.2	COVID_A2	50	0.0771903	0.0284576	0.00667849	0.33949	0.4469	0.0634	1.80343e-12	0.13166	0.069017	0.056437	Yes	Not assessed
1:161490956:G:A	rs116789381	FCGR2A.3309.2.2	COVID_A2	50	0.0771903	0.0284576	0.00667849	0.33949	-0.5587	0.1136	8.73732e-07	0.056497	0.1717	0.742122	Yes	Not assessed
1:161494119:G:A	rs150629305	FCGR2A.3309.2.2	COVID_A2	50	0.0771903	0.0284576	0.00667849	0.33949	-0.8036	0.1299	6.15939e-10	-0.35993	0.25491	0.157953	Yes	Not assessed
1:161495597:A:G	rs114587108	FCGR2A.3309.2.2	COVID_A2	50	0.0771903	0.0284576	0.00667849	0.33949	0.494	0.0737	2.04394e-11	0.082177	0.092028	0.37188	Yes	Not assessed
1:161498640:C:T	rs114797774	FCGR2A.3309.2.2	COVID_A2	50	0.0771903	0.0284576	0.00667849	0.33949	0.7118	0.0882	7.01286e-16	0.027793	0.16214	0.863899	Yes	Not assessed
1:161498819:A:C	rs74124991	FCGR2A.3309.2.2	COVID_A2	50	0.0771903	0.0284576	0.00667849	0.33949	0.5223	0.0825	2.43721e-10	0.16378	0.084392	0.052294	Yes	Not assessed
1:161500469:A:G	rs72717025	FCGR2A.3309.2.2	COVID_A2	50	0.0771903	0.0284576	0.00667849	0.33949	0.928	0.1181	3.91102e-15	-0.038316	0.21071	0.855706	Yes	Not assessed
1:161505324:C:G	rs72717028	FCGR2A.3309.2.2	COVID_A2	50	0.0771903	0.0284576	0.00667849	0.33949	-0.7357	0.1044	1.82902e-12	-0.19846	0.15215	0.192107	Yes	Not assessed
1:161506085:G:A	rs56315079	FCGR2A.3309.2.2	COVID_A2	50	0.0771903	0.0284576	0.00667849	0.33949	0.7459	0.0606	8.14426e-35	-0.087996	0.10926	0.420599	Yes	Not assessed
1:161508456:C:T	rs12120402	FCGR2A.3309.2.2	COVID_A2	50	0.0771903	0.0284576	0.00667849	0.33949	0.6889	0.0516	1.17223e-40	-0.04018	0.070165	0.566882	Yes	Not assessed
1:161509955:A:G	rs1801274	FCGR2A.3309.2.2	COVID_A2	50	0.0771903	0.0284576	0.00667849	0.33949	1.2389	0.0126	0	0.071916	0.036249	0.047262	Yes	Not assessed
1:161511740:G:A	rs113590334	FCGR2A.3309.2.2	COVID_A2	50	0.0771903	0.0284576	0.00667849	0.33949	-0.6161	0.0614	1.07828e-23	0.033562	0.092781	0.717551	Yes	Not assessed
1:161514409:A:C	rs139121685	FCGR2A.3309.2.2	COVID_A2	50	0.0771903	0.0284576	0.00667849	0.33949	-0.814	0.0734	1.40416e-28	-0.1175	0.12508	0.347526	Yes	Not assessed
1:161520250:T:C	rs2446629	FCGR2A.3309.2.2	COVID_A2	50	0.0771903	0.0284576	0.00667849	0.33949	0.4324	0.092	2.60161e-06	-0.026892	0.1993	0.892665	Yes	Not assessed
1:161520680:C:G	rs387693	FCGR2A.3309.2.2	COVID_A2	50	0.0771903	0.0284576	0.00667849	0.33949	0.342	0.0245	2.76584e-44	0.040615	0.038101	0.286432	Yes	Not assessed
1:161520734:T:C	rs71632953	FCGR2A.3309.2.2	COVID_A2	50	0.0771903	0.0284576	0.00667849	0.33949	0.6938	0.0662	1.06335e-25	0.024979	0.083124	0.763794	Yes	Not assessed
1:161521338:C:T	rs10919139	FCGR2A.3309.2.2	COVID_A2	50	0.0771903	0.0284576	0.00667849	0.33949	0.6215	0.1166	9.81108e-08	0.29155	0.19555	0.135982	Yes	Not assessed
1:161523905:G:A	rs41297664	FCGR2A.3309.2.2	COVID_A2	50	0.0771903	0.0284576	0.00667849	0.33949	-0.9227	0.1551	2.69678e-09	-0.0562	0.32142	0.861198	Yes	Not assessed
1:161540103:G:A	rs115002999	FCGR2A.3309.2.2	COVID_A2	50	0.0771903	0.0284576	0.00667849	0.33949	-0.6921	0.0708	1.43555e-22	-0.085455	0.1254	0.495581	Yes	Not assessed
1:161541184:C:T	rs141651278	FCGR2A.3309.2.2	COVID_A2	50	0.0771903	0.0284576	0.00667849	0.33949	-0.6027	0.063	1.10408e-21	0.038561	0.086716	0.65655	Yes	Not assessed
1:161544969:C:A	rs200065826	FCGR2A.3309.2.2	COVID_A2	50	0.0771903	0.0284576	0.00667849	0.33949	0.821	0.1539	9.57381e-08	-0.022239	0.35087	0.949462	No	Not a missense variant or in LD with missense variants
1:161546570:G:A	rs71632960	FCGR2A.3309.2.2	COVID_A2	50	0.0771903	0.0284576	0.00667849	0.33949	-0.5245	0.0591	7.00664e-19	-0.0029755	0.083921	0.971716	Yes	Not assessed
1:161556397:C:T	rs138010330	FCGR2A.3309.2.2	COVID_A2	50	0.0771903	0.0284576	0.00667849	0.33949	0.6521	0.0892	2.66075e-13	0.013368	0.1592	0.93308	Yes	Not assessed
1:161608316:G:T	rs141762637	FCGR2A.3309.2.2	COVID_A2	50	0.0771903	0.0284576	0.00667849	0.33949	0.3667	0.0821	7.95081e-06	0.020526	0.14221	0.885235	Yes	Not assessed
1:161619966:C:T	rs61802332	FCGR2A.3309.2.2	COVID_A2	50	0.0771903	0.0284576	0.00667849	0.33949	-0.3034	0.0258	6.29651e-32	0.007947	0.040369	0.843938	Yes	Not assessed
1:161707994:G:A	rs1954173	FCGR2A.3309.2.2	COVID_A2	50	0.0771903	0.0284576	0.00667849	0.33949	0.1707	0.0258	3.68353e-11	0.0031711	0.036784	0.931301	Yes	Not assessed
1:161747095:G:A	rs35801335	FCGR2A.3309.2.2	COVID_A2	50	0.0771903	0.0284576	0.00667849	0.33949	-0.4381	0.0621	1.72911e-12	-0.10954	0.080199	0.171985	Yes	Not assessed
1:161768448:A:C	rs4657101	FCGR2A.3309.2.2	COVID_A2	50	0.0771903	0.0284576	0.00667849	0.33949	-0.1956	0.0295	3.34532e-11	0.027459	0.032085	0.392097	Yes	Not assessed
1:161797001:T:G	rs185667728	FCGR2A.3309.2.2	COVID_A2	50	0.0771903	0.0284576	0.00667849	0.33949	0.6308	0.1355	3.2343e-06	-0.19897	0.25758	0.439843	Yes	Not assessed
1:161931418:C:T	rs61809464	FCGR2A.3309.2.2	COVID_A2	50	0.0771903	0.0284576	0.00667849	0.33949	0.3086	0.0471	5.67651e-11	-0.048166	0.08472	0.569674	Yes	Not assessed
1:161986014:C:T	rs2341465	FCGR2A.3309.2.2	COVID_A2	50	0.0771903	0.0284576	0.00667849	0.33949	-0.2034	0.0256	1.93702e-15	-0.014047	0.039046	0.71903	Yes	Not assessed
21:35482658:T:C	rs2834944	CBR3.14091.42.3	COVID_A2	20	0.092319	0.0357544	0.00982215	0.427965	-0.1316	0.028	2.60161e-06	-0.043527	0.032923	0.18614	Yes	Not assessed
21:35958434:C:T	rs7281493	CBR3.14091.42.3	COVID_A2	20	0.092319	0.0357544	0.00982215	0.427965	-0.1761	0.026	1.26072e-11	0.0065588	0.037296	0.860406	Yes	Not assessed
21:35997764:T:C	rs74759823	CBR3.14091.42.3	COVID_A2	20	0.092319	0.0357544	0.00982215	0.427965	-0.4728	0.078	1.34826e-09	0.32656	0.145	0.0243136	Yes	Not assessed
21:36062627:T:A	rs7282320	CBR3.14091.42.3	COVID_A2	20	0.092319	0.0357544	0.00982215	0.427965	-0.2193	0.0248	9.33978e-19	0.0089732	0.037169	0.809233	Yes	Not assessed
21:36069724:AAGAAAACCCCTC:A	rs146234708	CBR3.14091.42.3	COVID_A2	20	0.092319	0.0357544	0.00982215	0.427965	-0.6094	0.1276	1.78939e-06	-0.32355	0.20111	0.107655	Yes	Not assessed
21:36075960:C:T	rs62229261	CBR3.14091.42.3	COVID_A2	20	0.092319	0.0357544	0.00982215	0.427965	-0.5653	0.0833	1.15034e-11	-0.26054	0.17099	0.12758	Yes	Not assessed
21:36095817:T:C	rs77474176	CBR3.14091.42.3	COVID_A2	20	0.092319	0.0357544	0.00982215	0.427965	-0.4819	0.0902	9.16369e-08	0.15494	0.14412	0.282341	Yes	Not assessed
21:36103800:C:A	rs116906746	CBR3.14091.42.3	COVID_A2	20	0.092319	0.0357544	0.00982215	0.427965	-0.4509	0.0705	1.59767e-10	-0.11063	0.12653	0.381934	Yes	Not assessed
21:36120671:C:T	rs2242800	CBR3.14091.42.3	COVID_A2	20	0.092319	0.0357544	0.00982215	0.427965	-0.5483	0.0825	3.01041e-11	-0.063926	0.088741	0.4713	Yes	Not assessed
21:36148814:C:T	rs190194214	CBR3.14091.42.3	COVID_A2	20	0.092319	0.0357544	0.00982215	0.427965	0.8649	0.1576	4.06639e-08	0.1286	0.29905	0.667175	No	Not a missense variant or in LD with missense variants
21:36155449:T:C	rs59047459	CBR3.14091.42.3	COVID_A2	20	0.092319	0.0357544	0.00982215	0.427965	0.4864	0.1051	3.69262e-06	0.25775	0.10082	0.010572	Yes	Not assessed
21:36157225:G:A	rs141526940	CBR3.14091.42.3	COVID_A2	20	0.092319	0.0357544	0.00982215	0.427965	-0.6511	0.1389	2.76502e-06	-0.067759	0.1928	0.725253	No	Not a missense variant or in LD with missense variants
21:36159924:G:A	rs1028997	CBR3.14091.42.3	COVID_A2	20	0.092319	0.0357544	0.00982215	0.427965	-0.764	0.0222	1.53491e-259	-0.052849	0.028192	0.0608464	Yes	Not assessed
21:36173689:C:G	rs186865571	CBR3.14091.42.3	COVID_A2	20	0.092319	0.0357544	0.00982215	0.427965	0.9857	0.2103	2.77085e-06	-0.17102	0.41607	0.681046	No	Not a missense variant or in LD with missense variants
21:36183667:G:T	rs74743371	CBR3.14091.42.3	COVID_A2	20	0.092319	0.0357544	0.00982215	0.427965	-0.4594	0.069	2.77634e-11	0.017004	0.095335	0.85844	Yes	Not assessed
21:36190650:G:C	rs139433318	CBR3.14091.42.3	COVID_A2	20	0.092319	0.0357544	0.00982215	0.427965	-0.405	0.083	1.06345e-06	-0.18062	0.12198	0.138677	Yes	Not assessed
21:36203436:C:T	rs34593061	CBR3.14091.42.3	COVID_A2	20	0.092319	0.0357544	0.00982215	0.427965	-0.3507	0.0744	2.43247e-06	0.25527	0.12657	0.0437134	Yes	Not assessed
21:36219648:A:G	rs114993502	CBR3.14091.42.3	COVID_A2	20	0.092319	0.0357544	0.00982215	0.427965	-0.4569	0.0689	3.32631e-11	-0.28885	0.13787	0.036163	Yes	Not assessed
21:36225383:C:T	rs2284631	CBR3.14091.42.3	COVID_A2	20	0.092319	0.0357544	0.00982215	0.427965	0.295	0.0331	4.99456e-19	0.082318	0.048672	0.0907833	Yes	Not assessed
21:36249077:C:T	rs7510057	CBR3.14091.42.3	COVID_A2	20	0.092319	0.0357544	0.00982215	0.427965	0.1607	0.0277	6.57462e-09	-0.011309	0.040533	0.780239	Yes	Not assessed
3:98045784:C:T	rs144393567	ST3GAL6.6947.4.3	COVID_A2	16	-0.0767877	0.0319016	0.0160834	0.495591	-0.5873	0.0723	4.54431e-16	-0.022727	0.12689	0.857853	Yes	Not assessed
3:98091215:G:T	rs112431248	ST3GAL6.6947.4.3	COVID_A2	16	-0.0767877	0.0319016	0.0160834	0.495591	0.2015	0.0447	6.5494e-06	0.097058	0.072298	0.179443	Yes	Not assessed
3:98418100:G:A	rs377602728	ST3GAL6.6947.4.3	COVID_A2	16	-0.0767877	0.0319016	0.0160834	0.495591	-0.1222	0.0264	3.67812e-06	0.0058511	0.040719	0.885742	Yes	Not assessed
3:98545436:A:G	rs59241261	ST3GAL6.6947.4.3	COVID_A2	16	-0.0767877	0.0319016	0.0160834	0.495591	-0.2469	0.0452	4.69768e-08	-0.05563	0.055086	0.312555	Yes	Not assessed
3:98583758:G:A	rs3828372	ST3GAL6.6947.4.3	COVID_A2	16	-0.0767877	0.0319016	0.0160834	0.495591	0.2004	0.0258	8.00871e-15	-0.025617	0.037786	0.497804	Yes	Not assessed
3:98773647:C:CAT	rs5851138	ST3GAL6.6947.4.3	COVID_A2	16	-0.0767877	0.0319016	0.0160834	0.495591	-0.7173	0.0443	5.75492e-59	0.075554	0.080772	0.349583	Yes	Not assessed
3:98780118:G:A	rs11914715	ST3GAL6.6947.4.3	COVID_A2	16	-0.0767877	0.0319016	0.0160834	0.495591	0.2019	0.0343	3.94943e-09	-0.043247	0.037714	0.251502	Yes	Not assessed
3:98790861:G:A	rs72934623	ST3GAL6.6947.4.3	COVID_A2	16	-0.0767877	0.0319016	0.0160834	0.495591	-1.8784	0.0447	0	0.13232	0.062784	0.0350705	Yes	Not assessed
3:98882676:G:A	rs150233732	ST3GAL6.6947.4.3	COVID_A2	16	-0.0767877	0.0319016	0.0160834	0.495591	0.2582	0.0509	3.92228e-07	0.019554	0.081001	0.809242	Yes	Not assessed
3:99083096:G:A	rs190118085	ST3GAL6.6947.4.3	COVID_A2	16	-0.0767877	0.0319016	0.0160834	0.495591	-1.2083	0.1622	9.37336e-14	0.38156	0.28456	0.17996	No	Not a missense variant or in LD with missense variants
3:99165891:C:A	rs115903975	ST3GAL6.6947.4.3	COVID_A2	16	-0.0767877	0.0319016	0.0160834	0.495591	-0.8179	0.1216	1.74209e-11	0.20874	0.14409	0.147428	Yes	Not assessed
3:99319487:C:T	rs9871288	ST3GAL6.6947.4.3	COVID_A2	16	-0.0767877	0.0319016	0.0160834	0.495591	-0.2581	0.0274	4.52344e-21	0.034137	0.040938	0.404354	Yes	Not assessed
3:99338723:T:C	rs4501152	ST3GAL6.6947.4.3	COVID_A2	16	-0.0767877	0.0319016	0.0160834	0.495591	0.1792	0.0311	8.30945e-09	0.01205	0.033364	0.717974	Yes	Not assessed
3:99503565:T:C	rs142840786	ST3GAL6.6947.4.3	COVID_A2	16	-0.0767877	0.0319016	0.0160834	0.495591	-0.4716	0.1018	3.61079e-06	-0.20814	0.16812	0.2157	Yes	Not assessed
3:99610643:G:A	rs181066468	ST3GAL6.6947.4.3	COVID_A2	16	-0.0767877	0.0319016	0.0160834	0.495591	-1.1029	0.1547	1.00893e-12	-0.065385	0.38792	0.866148	No	Not a missense variant or in LD with missense variants
3:99634999:A:G	rs187619910	ST3GAL6.6947.4.3	COVID_A2	16	-0.0767877	0.0319016	0.0160834	0.495591	-0.6523	0.134	1.12784e-06	-0.14999	0.27621	0.58711	Yes	Not assessed
17:27560332:C:T	rs35246887	VTN.13125.45.3	COVID_A2	40	-0.0567306	0.0255349	0.0263045	0.495591	0.1772	0.0362	9.82919e-07	-0.039574	0.057141	0.488581	Yes	Not assessed
17:27568007:G:A	rs4795747	VTN.13125.45.3	COVID_A2	40	-0.0567306	0.0255349	0.0263045	0.495591	0.2474	0.053	3.04258e-06	0.014533	0.061554	0.813354	Yes	Not assessed
17:27817713:C:T	rs1014025	VTN.13125.45.3	COVID_A2	40	-0.0567306	0.0255349	0.0263045	0.495591	0.2003	0.0251	1.46239e-15	0.037613	0.037061	0.310156	Yes	Not assessed
17:27931243:G:A	rs35233508	VTN.13125.45.3	COVID_A2	40	-0.0567306	0.0255349	0.0263045	0.495591	0.5302	0.0674	3.64792e-15	-0.074464	0.082729	0.368069	Yes	Not assessed
17:27962469:C:T	rs113218396	VTN.13125.45.3	COVID_A2	40	-0.0567306	0.0255349	0.0263045	0.495591	0.4687	0.0536	2.24198e-18	0.056657	0.081952	0.48935	Yes	Not assessed
17:28018206:G:C	rs62065048	VTN.13125.45.3	COVID_A2	40	-0.0567306	0.0255349	0.0263045	0.495591	-0.4919	0.069	1.01111e-12	0.066206	0.10978	0.546456	Yes	Not assessed
17:28042309:G:A	rs35668234	VTN.13125.45.3	COVID_A2	40	-0.0567306	0.0255349	0.0263045	0.495591	0.5153	0.1093	2.42249e-06	0.076787	0.161	0.633406	Yes	Not assessed
17:28133950:C:A	rs17719191	VTN.13125.45.3	COVID_A2	40	-0.0567306	0.0255349	0.0263045	0.495591	0.5308	0.0548	3.45363e-22	-0.18047	0.083174	0.0300229	Yes	Not assessed
17:28141946:C:T	rs75539018	VTN.13125.45.3	COVID_A2	40	-0.0567306	0.0255349	0.0263045	0.495591	0.5108	0.0519	7.42176e-23	-0.018582	0.064354	0.772775	Yes	Not assessed
17:28214455:A:G	rs148067778	VTN.13125.45.3	COVID_A2	40	-0.0567306	0.0255349	0.0263045	0.495591	-0.4327	0.0526	1.93189e-16	-0.09949	0.089554	0.26659	Yes	Not assessed
17:28232714:G:A	rs57710047	VTN.13125.45.3	COVID_A2	40	-0.0567306	0.0255349	0.0263045	0.495591	-0.2431	0.0337	5.44717e-13	-0.072276	0.04893	0.139641	Yes	Not assessed
17:28239284:G:A	rs139068560	VTN.13125.45.3	COVID_A2	40	-0.0567306	0.0255349	0.0263045	0.495591	-0.5257	0.0815	1.11624e-10	0.025686	0.10485	0.806473	Yes	Not assessed
17:28267792:G:A	rs147777841	VTN.13125.45.3	COVID_A2	40	-0.0567306	0.0255349	0.0263045	0.495591	0.6456	0.0975	3.55479e-11	0.060938	0.16253	0.70771	Yes	Not assessed
17:28278851:T:C	rs117965786	VTN.13125.45.3	COVID_A2	40	-0.0567306	0.0255349	0.0263045	0.495591	0.6751	0.1172	8.3995e-09	-0.10907	0.16856	0.517587	Yes	Not assessed
17:28281654:A:G	rs138244195	VTN.13125.45.3	COVID_A2	40	-0.0567306	0.0255349	0.0263045	0.495591	0.5007	0.084	2.51138e-09	-0.075942	0.12272	0.536033	Yes	Not assessed
17:28284977:C:T	rs117794493	VTN.13125.45.3	COVID_A2	40	-0.0567306	0.0255349	0.0263045	0.495591	-0.4311	0.0777	2.88522e-08	0.10203	0.1168	0.382366	Yes	Not assessed
17:28299140:A:C	rs181760761	VTN.13125.45.3	COVID_A2	40	-0.0567306	0.0255349	0.0263045	0.495591	-0.4472	0.0971	4.11355e-06	-0.081835	0.11931	0.492775	Yes	Not assessed
17:28307288:G:T	rs112296497	VTN.13125.45.3	COVID_A2	40	-0.0567306	0.0255349	0.0263045	0.495591	-0.6968	0.067	2.47933e-25	0.099721	0.10581	0.345961	Yes	Not assessed
17:28310241:C:T	rs71372371	VTN.13125.45.3	COVID_A2	40	-0.0567306	0.0255349	0.0263045	0.495591	-0.5148	0.0533	4.52278e-22	0.12535	0.06277	0.0458281	Yes	Not assessed
17:28319433:C:A	rs72846720	VTN.13125.45.3	COVID_A2	40	-0.0567306	0.0255349	0.0263045	0.495591	-0.5177	0.0627	1.49657e-16	-0.087589	0.11629	0.451333	Yes	Not assessed
17:28331653:C:T	rs117121804	VTN.13125.45.3	COVID_A2	40	-0.0567306	0.0255349	0.0263045	0.495591	0.6284	0.1073	4.72789e-09	0.24458	0.16816	0.145822	Yes	Not assessed
17:28334133:G:A	rs3093718	VTN.13125.45.3	COVID_A2	40	-0.0567306	0.0255349	0.0263045	0.495591	0.4766	0.0605	3.335e-15	0.080877	0.1121	0.470619	Yes	Not assessed
17:28336185:C:G	rs146180490	VTN.13125.45.3	COVID_A2	40	-0.0567306	0.0255349	0.0263045	0.495591	0.7188	0.0995	5.04355e-13	0.33035	0.15192	0.0296676	Yes	Not assessed
17:28347105:TAGCCAGGTCGTA:T	rs140055200	VTN.13125.45.3	COVID_A2	40	-0.0567306	0.0255349	0.0263045	0.495591	-0.531	0.0539	6.74768e-23	-0.0045929	0.068029	0.946173	Yes	Not assessed
17:28347374:C:CA	rs3093723	VTN.13125.45.3	COVID_A2	40	-0.0567306	0.0255349	0.0263045	0.495591	-0.5635	0.1099	2.93789e-07	-0.32364	0.21234	0.127469	Yes	Not assessed
17:28358128:A:G	rs139205941	VTN.13125.45.3	COVID_A2	40	-0.0567306	0.0255349	0.0263045	0.495591	-0.6914	0.129	8.33649e-08	0.10031	0.19264	0.602567	Yes	Not assessed
17:28367015:T:A	rs2227742	VTN.13125.45.3	COVID_A2	40	-0.0567306	0.0255349	0.0263045	0.495591	-0.5891	0.091	9.56783e-11	-0.059512	0.13977	0.670264	Yes	Not assessed
17:28367840:G:A	rs704	VTN.13125.45.3	COVID_A2	40	-0.0567306	0.0255349	0.0263045	0.495591	1.0198	0.0172	0	-0.040582	0.027261	0.13658	Yes	Not assessed
17:28374084:T:G	rs571052714	VTN.13125.45.3	COVID_A2	40	-0.0567306	0.0255349	0.0263045	0.495591	0.679	0.0776	2.13353e-18	-0.083687	0.14935	0.575247	Yes	Not assessed
17:28395340:G:C	rs117397871	VTN.13125.45.3	COVID_A2	40	-0.0567306	0.0255349	0.0263045	0.495591	0.545	0.0978	2.50969e-08	0.095596	0.15978	0.549641	Yes	Not assessed
17:28407251:G:A	rs41297051	VTN.13125.45.3	COVID_A2	40	-0.0567306	0.0255349	0.0263045	0.495591	0.7617	0.1304	5.18082e-09	-0.26131	0.16468	0.112564	Yes	Not assessed
17:28414292:T:C	rs117348742	VTN.13125.45.3	COVID_A2	40	-0.0567306	0.0255349	0.0263045	0.495591	-0.523	0.0978	8.91044e-08	0.10474	0.10851	0.334416	Yes	Not assessed
17:28419875:C:T	rs147850750	VTN.13125.45.3	COVID_A2	40	-0.0567306	0.0255349	0.0263045	0.495591	-0.4494	0.0861	1.79395e-07	-0.062303	0.11011	0.571513	Yes	Not assessed
17:28433946:C:CAT	rs200409538	VTN.13125.45.3	COVID_A2	40	-0.0567306	0.0255349	0.0263045	0.495591	-0.4567	0.0913	5.66825e-07	-0.13635	0.1591	0.39144	Yes	Not assessed
17:28444547:A:G	rs111661889	VTN.13125.45.3	COVID_A2	40	-0.0567306	0.0255349	0.0263045	0.495591	-0.3496	0.0762	4.4767e-06	-0.019615	0.10743	0.855124	Yes	Not assessed
17:28456565:C:T	rs4794831	VTN.13125.45.3	COVID_A2	40	-0.0567306	0.0255349	0.0263045	0.495591	0.5443	0.0974	2.29309e-08	0.063044	0.12902	0.625098	Yes	Not assessed
17:28473186:A:G	rs3764866	VTN.13125.45.3	COVID_A2	40	-0.0567306	0.0255349	0.0263045	0.495591	-0.2527	0.0248	2.20861e-24	0.034402	0.036313	0.343448	Yes	Not assessed
17:29040962:G:A	rs146469611	VTN.13125.45.3	COVID_A2	40	-0.0567306	0.0255349	0.0263045	0.495591	0.6846	0.1346	3.65345e-07	-0.011844	0.27467	0.965605	Yes	Not assessed
17:29274352:A:G	rs56267272	VTN.13125.45.3	COVID_A2	40	-0.0567306	0.0255349	0.0263045	0.495591	-0.1255	0.027	3.34928e-06	0.02168	0.04165	0.602695	Yes	Not assessed
17:29340236:C:T	rs8079721	VTN.13125.45.3	COVID_A2	40	-0.0567306	0.0255349	0.0263045	0.495591	0.1638	0.031	1.26482e-07	-0.031765	0.043035	0.460441	Yes	Not assessed
2:134838398:GTTTT:G	rs1221107172	LCT.9017.58.3	COVID_A2	34	-0.088752	0.0395697	0.0249012	0.495591	-0.2615	0.0385	1.1043e-11	0.050148	0.048473	0.300877	Yes	Not assessed
2:134885144:G:A	rs111999127	LCT.9017.58.3	COVID_A2	34	-0.088752	0.0395697	0.0249012	0.495591	-0.2855	0.0311	4.30834e-20	0.055428	0.042972	0.197098	Yes	Not assessed
2:134925890:A:G	rs188166278	LCT.9017.58.3	COVID_A2	34	-0.088752	0.0395697	0.0249012	0.495591	-0.6726	0.1138	3.41342e-09	0.22166	0.15886	0.16292	Yes	Not assessed
2:134995143:C:T	rs115220505	LCT.9017.58.3	COVID_A2	34	-0.088752	0.0395697	0.0249012	0.495591	-0.3787	0.0671	1.66323e-08	0.098891	0.084988	0.244591	Yes	Not assessed
2:135121682:C:G	rs184273298	LCT.9017.58.3	COVID_A2	34	-0.088752	0.0395697	0.0249012	0.495591	-0.814	0.1335	1.07822e-09	0.189	0.15738	0.229784	Yes	Not assessed
2:135130978:G:C	rs146921207	LCT.9017.58.3	COVID_A2	34	-0.088752	0.0395697	0.0249012	0.495591	-0.8381	0.1185	1.52086e-12	0.027848	0.12897	0.829045	Yes	Not assessed
2:135245387:T:C	rs145643567	LCT.9017.58.3	COVID_A2	34	-0.088752	0.0395697	0.0249012	0.495591	-0.8381	0.1342	4.23376e-10	0.20756	0.14911	0.163925	Yes	Not assessed
2:135308478:C:T	rs147991728	LCT.9017.58.3	COVID_A2	34	-0.088752	0.0395697	0.0249012	0.495591	-1.0667	0.1633	6.48324e-11	-0.19142	0.207	0.355104	Yes	Not assessed
2:135335864:T:G	rs74789552	LCT.9017.58.3	COVID_A2	34	-0.088752	0.0395697	0.0249012	0.495591	-0.5336	0.1083	8.34785e-07	0.24723	0.11941	0.0384121	Yes	Not assessed
2:135348030:G:A	rs111911277	LCT.9017.58.3	COVID_A2	34	-0.088752	0.0395697	0.0249012	0.495591	-1.0564	0.1461	4.80638e-13	0.0072114	0.14003	0.958928	Yes	Not assessed
2:135418191:T:G	rs116470115	LCT.9017.58.3	COVID_A2	34	-0.088752	0.0395697	0.0249012	0.495591	-0.8098	0.1156	2.4665e-12	0.018315	0.12665	0.885018	Yes	Not assessed
2:135709261:C:G	rs6735935	LCT.9017.58.3	COVID_A2	34	-0.088752	0.0395697	0.0249012	0.495591	-0.7057	0.0989	9.64427e-13	0.12668	0.085559	0.138709	Yes	Not assessed
2:135746993:TTAG:T	rs201482431	LCT.9017.58.3	COVID_A2	34	-0.088752	0.0395697	0.0249012	0.495591	-0.6258	0.0941	2.92353e-11	0.1067	0.086487	0.21731	Yes	Not assessed
2:135816059:A:G	rs62158999	LCT.9017.58.3	COVID_A2	34	-0.088752	0.0395697	0.0249012	0.495591	-0.7912	0.1244	2.01585e-10	0.00038365	0.13595	0.997748	Yes	Not assessed
2:135857243:C:G	rs309181	LCT.9017.58.3	COVID_A2	34	-0.088752	0.0395697	0.0249012	0.495591	0.8028	0.0257	3.31559e-214	-0.14307	0.040522	0.000414501	Yes	Not assessed
2:135878655:G:C	rs147575785	LCT.9017.58.3	COVID_A2	34	-0.088752	0.0395697	0.0249012	0.495591	-0.7818	0.1332	4.37456e-09	-0.1003	0.13803	0.467438	Yes	Not assessed
2:135895878:G:T	rs142411099	LCT.9017.58.3	COVID_A2	34	-0.088752	0.0395697	0.0249012	0.495591	-0.9217	0.1398	4.31056e-11	-0.23582	0.19745	0.23235	Yes	Not assessed
2:135900428:A:C	rs148959072	LCT.9017.58.3	COVID_A2	34	-0.088752	0.0395697	0.0249012	0.495591	-0.7799	0.1132	5.59589e-12	-0.29457	0.16988	0.0829201	Yes	Not assessed
2:136005924:G:A	rs190509055	LCT.9017.58.3	COVID_A2	34	-0.088752	0.0395697	0.0249012	0.495591	-0.9812	0.1682	5.42664e-09	-0.24897	0.20662	0.228217	Yes	Not assessed
2:136017226:C:T	rs79141855	LCT.9017.58.3	COVID_A2	34	-0.088752	0.0395697	0.0249012	0.495591	-0.6991	0.1292	6.2677e-08	-0.18166	0.13765	0.186927	Yes	Not assessed
2:136040496:C:A	rs114413176	LCT.9017.58.3	COVID_A2	34	-0.088752	0.0395697	0.0249012	0.495591	-0.5742	0.0903	2.03331e-10	0.12496	0.10861	0.249922	Yes	Not assessed
2:136043502:G:C	rs184538984	LCT.9017.58.3	COVID_A2	34	-0.088752	0.0395697	0.0249012	0.495591	-0.8665	0.1751	7.47489e-07	0.17638	0.15405	0.252229	No	Not a missense variant or in LD with missense variants
2:136056533:C:T	rs115711565	LCT.9017.58.3	COVID_A2	34	-0.088752	0.0395697	0.0249012	0.495591	-0.5607	0.1032	5.53711e-08	0.29772	0.12425	0.0165689	Yes	Not assessed
2:136092084:A:C	rs72617027	LCT.9017.58.3	COVID_A2	34	-0.088752	0.0395697	0.0249012	0.495591	-0.4447	0.069	1.15656e-10	0.11451	0.072654	0.115003	Yes	Not assessed
2:136136294:C:T	rs16832995	LCT.9017.58.3	COVID_A2	34	-0.088752	0.0395697	0.0249012	0.495591	-0.3561	0.0457	6.58928e-15	0.03484	0.055886	0.533014	Yes	Not assessed
2:136172412:T:A	rs529560704	LCT.9017.58.3	COVID_A2	34	-0.088752	0.0395697	0.0249012	0.495591	-0.501	0.0772	8.60433e-11	0.139	0.10175	0.17191	Yes	Not assessed
2:136172515:C:G	rs75082903	LCT.9017.58.3	COVID_A2	34	-0.088752	0.0395697	0.0249012	0.495591	-0.3662	0.07	1.68205e-07	-0.040373	0.076945	0.599792	Yes	Not assessed
2:136256642:CT:C	rs149343241	LCT.9017.58.3	COVID_A2	34	-0.088752	0.0395697	0.0249012	0.495591	-0.2979	0.0369	6.84957e-16	0.11078	0.046574	0.0173795	Yes	Not assessed
2:136281660:C:A	rs10206655	LCT.9017.58.3	COVID_A2	34	-0.088752	0.0395697	0.0249012	0.495591	-0.4259	0.0579	1.89807e-13	-0.03799	0.056116	0.498412	Yes	Not assessed
2:136307639:G:A	rs116134631	LCT.9017.58.3	COVID_A2	34	-0.088752	0.0395697	0.0249012	0.495591	-0.4014	0.081	7.21239e-07	0.19	0.10412	0.0680286	Yes	Not assessed
2:136316562:G:A	rs6708702	LCT.9017.58.3	COVID_A2	34	-0.088752	0.0395697	0.0249012	0.495591	-0.1328	0.0269	7.94136e-07	0.049315	0.029781	0.0977377	Yes	Not assessed
2:136400414:A:G	rs1949297	LCT.9017.58.3	COVID_A2	34	-0.088752	0.0395697	0.0249012	0.495591	0.2226	0.0256	3.45877e-18	-0.038418	0.042483	0.365829	Yes	Not assessed
2:136423381:C:G	rs13015216	LCT.9017.58.3	COVID_A2	34	-0.088752	0.0395697	0.0249012	0.495591	0.2527	0.0267	2.95196e-21	-0.0051223	0.037621	0.891698	Yes	Not assessed
2:136644762:A:G	rs7597355	LCT.9017.58.3	COVID_A2	34	-0.088752	0.0395697	0.0249012	0.495591	0.189	0.0347	5.1317e-08	-0.0142	0.043597	0.744643	Yes	Not assessed
8:62800107:T:C	rs7816541	GGH.9370.69.3	COVID_A2	9	-0.122318	0.054081	0.0237123	0.495591	-0.1291	0.0249	2.16318e-07	-0.045357	0.03763	0.228072	Yes	Not assessed
8:62891646:A:T	rs17273723	GGH.9370.69.3	COVID_A2	9	-0.122318	0.054081	0.0237123	0.495591	-0.2889	0.0649	8.52869e-06	-0.10007	0.08701	0.250104	Yes	Not assessed
8:63011205:T:C	rs10957266	GGH.9370.69.3	COVID_A2	9	-0.122318	0.054081	0.0237123	0.495591	0.7985	0.0456	1.18174e-68	-0.10281	0.054677	0.0600651	Yes	Not assessed
8:63053066:A:G	rs7001383	GGH.9370.69.3	COVID_A2	9	-0.122318	0.054081	0.0237123	0.495591	-0.3719	0.0249	1.92912e-50	0.049265	0.027793	0.0763002	Yes	Not assessed
8:63120681:G:C	rs148184939	GGH.9370.69.3	COVID_A2	9	-0.122318	0.054081	0.0237123	0.495591	-0.6101	0.0758	8.36011e-16	0.18506	0.096474	0.055081	Yes	Not assessed
8:63135620:T:C	rs192554442	GGH.9370.69.3	COVID_A2	9	-0.122318	0.054081	0.0237123	0.495591	-0.5354	0.086	4.79773e-10	-0.18265	0.12465	0.142838	Yes	Not assessed
8:63141279:TTTA:T	rs986938806	GGH.9370.69.3	COVID_A2	9	-0.122318	0.054081	0.0237123	0.495591	-0.1999	0.0298	1.97237e-11	0.053079	0.047276	0.261545	Yes	Not assessed
8:63402500:G:C	rs533884861	GGH.9370.69.3	COVID_A2	9	-0.122318	0.054081	0.0237123	0.495591	0.7414	0.1547	1.64714e-06	-0.23199	0.42181	0.582328	No	Not a missense variant or in LD with missense variants
8:63442061:G:A	rs1560506	GGH.9370.69.3	COVID_A2	9	-0.122318	0.054081	0.0237123	0.495591	-0.1244	0.0265	2.67469e-06	0.00059444	0.029629	0.983993	Yes	Not assessed
5:96441847:G:C	rs6896567	ERAP2.8960.3.3	COVID_A2	43	-0.0481625	0.0218662	0.0276231	0.495591	-0.1704	0.0314	5.73889e-08	-0.083868	0.043215	0.0522929	Yes	Not assessed
5:96477573:C:T	rs7703705	ERAP2.8960.3.3	COVID_A2	43	-0.0481625	0.0218662	0.0276231	0.495591	-0.1352	0.0304	8.69287e-06	0.032189	0.033804	0.340983	Yes	Not assessed
5:96495489:G:A	rs156015	ERAP2.8960.3.3	COVID_A2	43	-0.0481625	0.0218662	0.0276231	0.495591	-0.1791	0.027	3.2819e-11	0.07498	0.039162	0.0555421	Yes	Not assessed
5:96597878:C:T	rs55751508	ERAP2.8960.3.3	COVID_A2	43	-0.0481625	0.0218662	0.0276231	0.495591	-0.2559	0.0395	9.26506e-11	0.054115	0.062374	0.385619	Yes	Not assessed
5:96621124:C:T	rs4582302	ERAP2.8960.3.3	COVID_A2	43	-0.0481625	0.0218662	0.0276231	0.495591	0.1227	0.0254	1.36048e-06	-0.0094877	0.037109	0.798205	Yes	Not assessed
5:96643177:T:C	rs115299460	ERAP2.8960.3.3	COVID_A2	43	-0.0481625	0.0218662	0.0276231	0.495591	0.547	0.1093	5.59855e-07	0.031226	0.21567	0.88488	Yes	Not assessed
5:96646595:C:T	rs71630744	ERAP2.8960.3.3	COVID_A2	43	-0.0481625	0.0218662	0.0276231	0.495591	0.5516	0.0918	1.87e-09	-0.0039064	0.09525	0.967286	Yes	Not assessed
5:96714975:A:AG	rs66946447	ERAP2.8960.3.3	COVID_A2	43	-0.0481625	0.0218662	0.0276231	0.495591	-0.2804	0.0244	1.45052e-30	-0.025626	0.036802	0.486228	Yes	Not assessed
5:96716300:C:A	rs113910560	ERAP2.8960.3.3	COVID_A2	43	-0.0481625	0.0218662	0.0276231	0.495591	-0.6297	0.1314	1.64932e-06	-0.065609	0.22017	0.765709	Yes	Not assessed
5:96745230:C:T	rs57889668	ERAP2.8960.3.3	COVID_A2	43	-0.0481625	0.0218662	0.0276231	0.495591	-0.3237	0.0298	1.74081e-27	0.040883	0.04195	0.329776	Yes	Not assessed
5:96812507:A:G	rs112966089	ERAP2.8960.3.3	COVID_A2	43	-0.0481625	0.0218662	0.0276231	0.495591	0.8516	0.1675	3.69219e-07	-0.19193	0.35159	0.585141	Yes	Not assessed
5:96831854:T:A	rs182303438	ERAP2.8960.3.3	COVID_A2	43	-0.0481625	0.0218662	0.0276231	0.495591	0.6268	0.1322	2.1235e-06	0.36	0.25383	0.156111	Yes	Not assessed
5:96832278:T:A	rs1991011	ERAP2.8960.3.3	COVID_A2	43	-0.0481625	0.0218662	0.0276231	0.495591	-0.313	0.0343	7.14953e-20	0.01812	0.048909	0.711022	Yes	Not assessed
5:96849299:G:T	rs78824072	ERAP2.8960.3.3	COVID_A2	43	-0.0481625	0.0218662	0.0276231	0.495591	0.6573	0.0484	5.22124e-42	-0.07917	0.076517	0.300822	Yes	Not assessed
5:96856243:C:T	rs185972411	ERAP2.8960.3.3	COVID_A2	43	-0.0481625	0.0218662	0.0276231	0.495591	0.5891	0.07	3.90508e-17	0.093248	0.13205	0.480091	Yes	Not assessed
5:96880513:T:C	rs2617448	ERAP2.8960.3.3	COVID_A2	43	-0.0481625	0.0218662	0.0276231	0.495591	-0.3065	0.0379	6.11165e-16	0.043691	0.043913	0.319763	Yes	Not assessed
5:96882318:G:T	rs80159277	ERAP2.8960.3.3	COVID_A2	43	-0.0481625	0.0218662	0.0276231	0.495591	0.6015	0.0972	6.08275e-10	-0.083943	0.17282	0.627162	Yes	Not assessed
5:96885510:A:C	rs116686438	ERAP2.8960.3.3	COVID_A2	43	-0.0481625	0.0218662	0.0276231	0.495591	-0.7951	0.1555	3.16775e-07	-0.24193	0.3858	0.530602	Yes	Not assessed
5:96895352:T:G	rs34261036	ERAP2.8960.3.3	COVID_A2	43	-0.0481625	0.0218662	0.0276231	0.495591	2.2906	0.1697	1.60815e-41	0.030518	0.21786	0.888596	No	Not a missense variant or in LD with missense variants
5:96898979:A:C	rs17486181	ERAP2.8960.3.3	COVID_A2	43	-0.0481625	0.0218662	0.0276231	0.495591	-1.5546	0.0475	6.15804e-235	0.097461	0.055105	0.0769537	Yes	Not assessed
5:96899759:T:C	rs138109195	ERAP2.8960.3.3	COVID_A2	43	-0.0481625	0.0218662	0.0276231	0.495591	0.6281	0.104	1.54666e-09	0.15139	0.12946	0.242244	Yes	Not assessed
5:96907742:G:A	rs186357316	ERAP2.8960.3.3	COVID_A2	43	-0.0481625	0.0218662	0.0276231	0.495591	0.648	0.1211	8.74939e-08	-0.10611	0.23543	0.652201	Yes	Not assessed
5:96916885:T:C	rs2910686	ERAP2.8960.3.3	COVID_A2	43	-0.0481625	0.0218662	0.0276231	0.495591	1.0523	0.0168	0	-0.033869	0.027699	0.221423	Yes	Not assessed
5:96940955:G:A	rs151084967	ERAP2.8960.3.3	COVID_A2	43	-0.0481625	0.0218662	0.0276231	0.495591	0.8009	0.0952	4.00286e-17	-0.15071	0.12135	0.214257	Yes	Not assessed
5:96954351:A:G	rs72775862	ERAP2.8960.3.3	COVID_A2	43	-0.0481625	0.0218662	0.0276231	0.495591	-0.5827	0.1251	3.19492e-06	0.25859	0.17704	0.144117	Yes	Not assessed
5:97001683:C:T	rs150725010	ERAP2.8960.3.3	COVID_A2	43	-0.0481625	0.0218662	0.0276231	0.495591	-0.637	0.0868	2.15663e-13	0.087752	0.12159	0.470476	Yes	Not assessed
5:97008813:T:C	rs56140709	ERAP2.8960.3.3	COVID_A2	43	-0.0481625	0.0218662	0.0276231	0.495591	-0.3505	0.0648	6.33951e-08	-0.01345	0.071348	0.850475	Yes	Not assessed
5:97020862:T:C	rs147209075	ERAP2.8960.3.3	COVID_A2	43	-0.0481625	0.0218662	0.0276231	0.495591	-0.5163	0.0867	2.60044e-09	-0.18276	0.15146	0.227565	Yes	Not assessed
5:97026897:G:A	rs27297	ERAP2.8960.3.3	COVID_A2	43	-0.0481625	0.0218662	0.0276231	0.495591	-0.8101	0.1786	5.73762e-06	0.21473	0.18166	0.237188	Yes	Not assessed
5:97030387:G:C	rs78432477	ERAP2.8960.3.3	COVID_A2	43	-0.0481625	0.0218662	0.0276231	0.495591	0.4966	0.0959	2.23904e-07	-0.23622	0.18855	0.21027	Yes	Not assessed
5:97041062:T:A	rs7706943	ERAP2.8960.3.3	COVID_A2	43	-0.0481625	0.0218662	0.0276231	0.495591	0.2343	0.0278	3.5145e-17	0.032651	0.041014	0.425977	Yes	Not assessed
5:97064414:C:T	rs112797517	ERAP2.8960.3.3	COVID_A2	43	-0.0481625	0.0218662	0.0276231	0.495591	-0.4551	0.0909	5.53997e-07	0.022573	0.11431	0.843458	Yes	Not assessed
5:97064678:G:A	rs116683283	ERAP2.8960.3.3	COVID_A2	43	-0.0481625	0.0218662	0.0276231	0.495591	-0.6329	0.1268	5.99665e-07	0.013739	0.19118	0.94271	Yes	Not assessed
5:97085840:A:G	rs6888479	ERAP2.8960.3.3	COVID_A2	43	-0.0481625	0.0218662	0.0276231	0.495591	-0.5364	0.0567	3.0701e-21	0.065642	0.057914	0.25703	Yes	Not assessed
5:97086776:T:C	rs10038030	ERAP2.8960.3.3	COVID_A2	43	-0.0481625	0.0218662	0.0276231	0.495591	0.2545	0.0396	1.30346e-10	-0.01067	0.065596	0.870784	Yes	Not assessed
5:97090466:T:A	rs146989326	ERAP2.8960.3.3	COVID_A2	43	-0.0481625	0.0218662	0.0276231	0.495591	0.6365	0.1043	1.04364e-09	-0.15818	0.22257	0.477272	Yes	Not assessed
5:97094046:G:A	rs143795124	ERAP2.8960.3.3	COVID_A2	43	-0.0481625	0.0218662	0.0276231	0.495591	-0.498	0.1099	5.85962e-06	-0.14309	0.19994	0.474198	Yes	Not assessed
5:97142297:A:G	rs115059230	ERAP2.8960.3.3	COVID_A2	43	-0.0481625	0.0218662	0.0276231	0.495591	-0.3523	0.0491	7.22265e-13	0.079013	0.081263	0.330895	Yes	Not assessed
5:97145221:C:T	rs111370908	ERAP2.8960.3.3	COVID_A2	43	-0.0481625	0.0218662	0.0276231	0.495591	0.2606	0.0549	2.06647e-06	0.2709	0.10018	0.0068483	Yes	Not assessed
5:97146631:C:T	rs6556949	ERAP2.8960.3.3	COVID_A2	43	-0.0481625	0.0218662	0.0276231	0.495591	-0.1877	0.0293	1.49247e-10	0.0063641	0.046058	0.890101	Yes	Not assessed
5:97173239:C:T	rs35713904	ERAP2.8960.3.3	COVID_A2	43	-0.0481625	0.0218662	0.0276231	0.495591	0.417	0.088	2.15161e-06	0.049702	0.10208	0.626334	Yes	Not assessed
5:97272672:C:G	rs1845663	ERAP2.8960.3.3	COVID_A2	43	-0.0481625	0.0218662	0.0276231	0.495591	-0.1403	0.0254	3.32081e-08	-0.0097145	0.028515	0.733344	Yes	Not assessed
5:97722561:G:A	rs116772355	ERAP2.8960.3.3	COVID_A2	43	-0.0481625	0.0218662	0.0276231	0.495591	-0.2472	0.055	6.97187e-06	-0.016094	0.076031	0.832359	Yes	Not assessed
19:5573333:C:T	rs8112148	FUT3.4548.4.2	COVID_A2	25	-0.100338	0.0414436	0.0154743	0.495591	-0.1396	0.03	3.26612e-06	-0.0064655	0.042387	0.878765	Yes	Not assessed
19:5759405:A:T	rs3097893	FUT3.4548.4.2	COVID_A2	25	-0.100338	0.0414436	0.0154743	0.495591	0.2339	0.0325	6.15865e-13	-0.0094455	0.048853	0.846689	Yes	Not assessed
19:5764739:G:A	rs147124149	FUT3.4548.4.2	COVID_A2	25	-0.100338	0.0414436	0.0154743	0.495591	-0.3097	0.0629	8.4928e-07	0.042874	0.087203	0.622962	Yes	Not assessed
19:5790861:C:T	rs185897394	FUT3.4548.4.2	COVID_A2	25	-0.100338	0.0414436	0.0154743	0.495591	-1.055	0.1914	3.54745e-08	-0.14065	0.27686	0.61144	Yes	Not assessed
19:5810373:G:A	rs6510858	FUT3.4548.4.2	COVID_A2	25	-0.100338	0.0414436	0.0154743	0.495591	-0.1931	0.0313	6.85804e-10	-0.024241	0.044682	0.587458	Yes	Not assessed
19:5810465:C:T	rs144763935	FUT3.4548.4.2	COVID_A2	25	-0.100338	0.0414436	0.0154743	0.495591	0.4791	0.0881	5.38401e-08	-0.24531	0.13695	0.0732552	Yes	Not assessed
19:5819265:G:T	rs112398182	FUT3.4548.4.2	COVID_A2	25	-0.100338	0.0414436	0.0154743	0.495591	-0.6905	0.0843	2.59098e-16	0.19074	0.097488	0.0504006	Yes	Not assessed
19:5821601:C:T	rs117800360	FUT3.4548.4.2	COVID_A2	25	-0.100338	0.0414436	0.0154743	0.495591	-0.6453	0.1284	5.01597e-07	-0.11332	0.25822	0.66077	No	Not a missense variant or in LD with missense variants
19:5822697:C:G	rs2436519	FUT3.4548.4.2	COVID_A2	25	-0.100338	0.0414436	0.0154743	0.495591	-0.286	0.0262	9.66271e-28	0.030059	0.027549	0.275224	Yes	Not assessed
19:5834535:C:T	rs143814846	FUT3.4548.4.2	COVID_A2	25	-0.100338	0.0414436	0.0154743	0.495591	-0.6917	0.1493	3.60485e-06	0.26816	0.21926	0.221321	Yes	Not assessed
19:5838649:G:T	rs147625395	FUT3.4548.4.2	COVID_A2	25	-0.100338	0.0414436	0.0154743	0.495591	-0.7873	0.096	2.38313e-16	0.12403	0.11251	0.270292	Yes	Not assessed
19:5839928:C:T	rs112358826	FUT3.4548.4.2	COVID_A2	25	-0.100338	0.0414436	0.0154743	0.495591	-0.8036	0.1156	3.61276e-12	-0.16668	0.16226	0.304307	Yes	Not assessed
19:5840608:C:T	rs708686	FUT3.4548.4.2	COVID_A2	25	-0.100338	0.0414436	0.0154743	0.495591	-0.853	0.0242	3.69035e-272	0.10025	0.038439	0.00910654	Yes	Not assessed
19:5840622:G:A	rs369325804	FUT3.4548.4.2	COVID_A2	25	-0.100338	0.0414436	0.0154743	0.495591	-0.9539	0.1717	2.76628e-08	-0.066179	0.31851	0.835403	No	Not a missense variant or in LD with missense variants
19:5842308:T:A	rs28381972	FUT3.4548.4.2	COVID_A2	25	-0.100338	0.0414436	0.0154743	0.495591	0.3012	0.0465	9.33046e-11	-0.032928	0.065923	0.617433	Yes	Not assessed
19:5844332:C:T	rs3745635	FUT3.4548.4.2	COVID_A2	25	-0.100338	0.0414436	0.0154743	0.495591	-0.7087	0.0944	6.03062e-14	-0.16217	0.10123	0.109157	Yes	Not assessed
19:5844793:C:G	rs145362171	FUT3.4548.4.2	COVID_A2	25	-0.100338	0.0414436	0.0154743	0.495591	-0.6871	0.1306	1.43194e-07	0.12301	0.15431	0.425357	Yes	Not assessed
19:5850335:C:T	rs117095068	FUT3.4548.4.2	COVID_A2	25	-0.100338	0.0414436	0.0154743	0.495591	0.4766	0.1002	1.96991e-06	0.25276	0.19307	0.190479	Yes	Not assessed
19:5852910:G:A	rs28742583	FUT3.4548.4.2	COVID_A2	25	-0.100338	0.0414436	0.0154743	0.495591	-0.6555	0.0754	3.51027e-18	0.27153	0.14143	0.0548718	Yes	Not assessed
19:5856563:C:T	rs708687	FUT3.4548.4.2	COVID_A2	25	-0.100338	0.0414436	0.0154743	0.495591	-0.2941	0.033	5.00654e-19	-0.065108	0.04718	0.167589	Yes	Not assessed
19:5856726:C:G	rs112707843	FUT3.4548.4.2	COVID_A2	25	-0.100338	0.0414436	0.0154743	0.495591	0.2369	0.0404	4.52225e-09	-0.10434	0.061658	0.0906006	Yes	Not assessed
19:5860366:C:G	rs74174349	FUT3.4548.4.2	COVID_A2	25	-0.100338	0.0414436	0.0154743	0.495591	0.5586	0.0963	6.6069e-09	0.11034	0.1195	0.355826	Yes	Not assessed
19:5867902:G:A	rs778972	FUT3.4548.4.2	COVID_A2	25	-0.100338	0.0414436	0.0154743	0.495591	0.1769	0.0296	2.28191e-09	-0.077281	0.043401	0.0749734	Yes	Not assessed
19:5878269:C:T	rs72989043	FUT3.4548.4.2	COVID_A2	25	-0.100338	0.0414436	0.0154743	0.495591	-0.2071	0.0421	8.68809e-07	-0.090627	0.069482	0.192123	Yes	Not assessed
19:5990944:T:C	rs8108685	FUT3.4548.4.2	COVID_A2	25	-0.100338	0.0414436	0.0154743	0.495591	-0.3544	0.0594	2.42649e-09	0.035131	0.098473	0.721273	Yes	Not assessed
11:119971851:C:T	rs116893335	OAF.6414.8.3	COVID_A2	7	-0.114119	0.0508214	0.0247368	0.495591	0.8331	0.1677	6.77169e-07	0.35506	0.284	0.211222	Yes	Not assessed
11:120108035:T:G	rs605742	OAF.6414.8.3	COVID_A2	7	-0.114119	0.0508214	0.0247368	0.495591	-0.1896	0.0427	8.98415e-06	-0.001647	0.062305	0.978911	Yes	Not assessed
11:120139944:G:C	rs77379157	OAF.6414.8.3	COVID_A2	7	-0.114119	0.0508214	0.0247368	0.495591	-0.2842	0.064	8.9698e-06	0.072688	0.10659	0.495277	Yes	Not assessed
11:120153773:G:GC	rs71301642	OAF.6414.8.3	COVID_A2	7	-0.114119	0.0508214	0.0247368	0.495591	-0.3459	0.0676	3.10658e-07	0.085086	0.11425	0.456432	Yes	Not assessed
11:120185708:A:T	rs2444239	OAF.6414.8.3	COVID_A2	7	-0.114119	0.0508214	0.0247368	0.495591	0.3699	0.0243	2.5183e-52	-0.018407	0.027296	0.50009	Yes	Not assessed
11:120188786:G:A	rs10892546	OAF.6414.8.3	COVID_A2	7	-0.114119	0.0508214	0.0247368	0.495591	-0.4965	0.1049	2.21139e-06	0.034715	0.097039	0.720536	Yes	Not assessed
11:120227620:C:T	rs117554512	OAF.6414.8.3	COVID_A2	7	-0.114119	0.0508214	0.0247368	0.495591	0.6816	0.0431	2.47615e-56	-0.12195	0.051178	0.0171787	Yes	Not assessed
1:169608095:A:G	rs2142760	SELL.4831.4.2	COVID_A2	11	-0.114018	0.0516941	0.0274102	0.495591	-0.2401	0.025	7.69008e-22	0.019699	0.037283	0.597247	Yes	Not assessed
1:169696410:G:T	rs4987358	SELL.4831.4.2	COVID_A2	11	-0.114018	0.0516941	0.0274102	0.495591	-0.5165	0.0261	3.68323e-87	0.063861	0.030599	0.0368855	Yes	Not assessed
1:169698686:G:A	rs189331391	SELL.4831.4.2	COVID_A2	11	-0.114018	0.0516941	0.0274102	0.495591	-0.5838	0.1287	5.72957e-06	-0.011708	0.20837	0.955192	Yes	Not assessed
1:169702272:A:G	rs4987320	SELL.4831.4.2	COVID_A2	11	-0.114018	0.0516941	0.0274102	0.495591	0.2978	0.0427	3.07531e-12	-0.025493	0.043733	0.559945	Yes	Not assessed
1:169738751:A:C	rs76798248	SELL.4831.4.2	COVID_A2	11	-0.114018	0.0516941	0.0274102	0.495591	-0.5348	0.0978	4.54366e-08	-0.084912	0.13097	0.51677	Yes	Not assessed
1:169768244:A:C	rs562679239	SELL.4831.4.2	COVID_A2	11	-0.114018	0.0516941	0.0274102	0.495591	0.3372	0.043	4.43919e-15	-0.061701	0.064103	0.335784	Yes	Not assessed
1:169837395:G:T	rs17602009	SELL.4831.4.2	COVID_A2	11	-0.114018	0.0516941	0.0274102	0.495591	-0.4507	0.0919	9.3788e-07	-0.13245	0.15306	0.386848	Yes	Not assessed
1:169856388:A:G	rs12128754	SELL.4831.4.2	COVID_A2	11	-0.114018	0.0516941	0.0274102	0.495591	0.2484	0.034	2.75453e-13	-0.0092132	0.037474	0.805794	Yes	Not assessed
1:169906736:G:C	rs150754861	SELL.4831.4.2	COVID_A2	11	-0.114018	0.0516941	0.0274102	0.495591	-0.4481	0.099	6.0036e-06	0.096528	0.13729	0.481996	Yes	Not assessed
1:170084705:A:G	rs187579255	SELL.4831.4.2	COVID_A2	11	-0.114018	0.0516941	0.0274102	0.495591	-0.7193	0.1276	1.7289e-08	0.10867	0.23031	0.637039	Yes	Not assessed
1:170532434:A:G	rs148024641	SELL.4831.4.2	COVID_A2	11	-0.114018	0.0516941	0.0274102	0.495591	-0.2414	0.0535	6.41739e-06	0.1403	0.10143	0.166597	Yes	Not assessed
11:125392985:T:C	rs61917821	PATE4.8065.245.3	COVID_A2	7	0.134619	0.0603599	0.0257291	0.495591	0.2982	0.0645	3.77763e-06	0.079219	0.090492	0.381342	Yes	Not assessed
11:125565866:T:A	rs76986270	PATE4.8065.245.3	COVID_A2	7	0.134619	0.0603599	0.0257291	0.495591	0.2929	0.0435	1.6582e-11	0.15777	0.061685	0.0105375	Yes	Not assessed
11:125701046:A:T	rs12288034	PATE4.8065.245.3	COVID_A2	7	0.134619	0.0603599	0.0257291	0.495591	-0.1811	0.0373	1.20248e-06	0.0075209	0.0446	0.866088	Yes	Not assessed
11:125778321:C:T	rs517463	PATE4.8065.245.3	COVID_A2	7	0.134619	0.0603599	0.0257291	0.495591	-0.1847	0.0285	9.1297e-11	-0.013423	0.031621	0.671204	Yes	Not assessed
11:125828759:T:A	rs875500	PATE4.8065.245.3	COVID_A2	7	0.134619	0.0603599	0.0257291	0.495591	-0.4819	0.0262	1.49118e-75	-0.061561	0.029506	0.0369434	Yes	Not assessed
11:125865773:G:C	rs113034193	PATE4.8065.245.3	COVID_A2	7	0.134619	0.0603599	0.0257291	0.495591	-0.1782	0.0396	6.79535e-06	-0.078298	0.067742	0.247752	Yes	Not assessed
11:125959610:A:C	rs77555036	PATE4.8065.245.3	COVID_A2	7	0.134619	0.0603599	0.0257291	0.495591	-0.189	0.04	2.30115e-06	0.077829	0.064587	0.228193	Yes	Not assessed
19:40402215:A:G	rs184390842	MIA.2687.2.1	COVID_A2	12	-0.0857196	0.0368464	0.0199972	0.495591	0.2937	0.066	8.58703e-06	0.066795	0.10616	0.529224	Yes	Not assessed
19:40531367:G:C	rs112093859	MIA.2687.2.1	COVID_A2	12	-0.0857196	0.0368464	0.0199972	0.495591	0.5003	0.1093	4.70993e-06	-0.093026	0.10211	0.362276	Yes	Not assessed
19:40644628:C:T	rs112395012	MIA.2687.2.1	COVID_A2	12	-0.0857196	0.0368464	0.0199972	0.495591	0.2183	0.0439	6.60387e-07	-0.12436	0.048601	0.0105036	Yes	Not assessed
19:40659987:G:A	rs183384892	MIA.2687.2.1	COVID_A2	12	-0.0857196	0.0368464	0.0199972	0.495591	1.5053	0.1792	4.46054e-17	-0.3346	0.27552	0.224583	No	Not a missense variant or in LD with missense variants
19:40700850:A:C	rs2604885	MIA.2687.2.1	COVID_A2	12	-0.0857196	0.0368464	0.0199972	0.495591	0.194	0.0251	1.08323e-14	0.007546	0.028744	0.792917	Yes	Not assessed
19:40769143:T:C	rs2604877	MIA.2687.2.1	COVID_A2	12	-0.0857196	0.0368464	0.0199972	0.495591	1.4417	0.0424	2.05598e-253	-0.11075	0.054	0.0402742	Yes	Not assessed
19:40789954:G:T	rs7245595	MIA.2687.2.1	COVID_A2	12	-0.0857196	0.0368464	0.0199972	0.495591	-0.2553	0.0257	2.96572e-23	0.0069339	0.038539	0.857216	Yes	Not assessed
19:40833083:C:G	rs2258380	MIA.2687.2.1	COVID_A2	12	-0.0857196	0.0368464	0.0199972	0.495591	-0.2252	0.0296	2.78137e-14	-0.016403	0.046074	0.72183	Yes	Not assessed
19:40919919:C:T	rs138937335	MIA.2687.2.1	COVID_A2	12	-0.0857196	0.0368464	0.0199972	0.495591	0.6634	0.092	5.55957e-13	-0.11801	0.10527	0.262278	Yes	Not assessed
19:40920139:G:GT	rs55779134	MIA.2687.2.1	COVID_A2	12	-0.0857196	0.0368464	0.0199972	0.495591	-0.1578	0.0258	9.57855e-10	0.045549	0.038745	0.239751	Yes	Not assessed
19:41008915:T:C	rs4061281	MIA.2687.2.1	COVID_A2	12	-0.0857196	0.0368464	0.0199972	0.495591	0.2162	0.0282	1.76524e-14	0.003912	0.040844	0.923696	Yes	Not assessed
19:41360424:G:C	rs112293892	MIA.2687.2.1	COVID_A2	12	-0.0857196	0.0368464	0.0199972	0.495591	0.3278	0.0635	2.44058e-07	-0.040718	0.085825	0.635193	Yes	Not assessed
2:134838398:GTTTT:G	rs1221107172	LCT.9017.58.3	COVID_B1	34	-0.124355	0.0395697	0.0249012	0.495591	-0.2615	0.0385	1.1043e-11	-0.09229	0.097656	0.344632	Yes	Not assessed
2:134855149:G:C	rs112237628	LCT.9017.58.3	COVID_B1	34	-0.124355	0.0395697	0.0249012	0.495591	-0.6198	0.1248	6.82261e-07	0.56721	0.24307	0.0196206	Yes	Not assessed
2:134885144:G:A	rs111999127	LCT.9017.58.3	COVID_B1	34	-0.124355	0.0395697	0.0249012	0.495591	-0.2855	0.0311	4.30834e-20	0.02275	0.058559	0.697648	Yes	Not assessed
2:134981880:CTTTT:C	rs971238545	LCT.9017.58.3	COVID_B1	34	-0.124355	0.0395697	0.0249012	0.495591	-0.6036	0.116	1.95624e-07	0.016202	0.13131	0.9018	Yes	Not assessed
2:134995143:C:T	rs115220505	LCT.9017.58.3	COVID_B1	34	-0.124355	0.0395697	0.0249012	0.495591	-0.3787	0.0671	1.66323e-08	-0.046797	0.14198	0.7417	Yes	Not assessed
2:135121682:C:G	rs184273298	LCT.9017.58.3	COVID_B1	34	-0.124355	0.0395697	0.0249012	0.495591	-0.814	0.1335	1.07822e-09	0.31475	0.35587	0.376452	Yes	Not assessed
2:135130978:G:C	rs146921207	LCT.9017.58.3	COVID_B1	34	-0.124355	0.0395697	0.0249012	0.495591	-0.8381	0.1185	1.52086e-12	0.1001	0.30171	0.740059	Yes	Not assessed
2:135245387:T:C	rs145643567	LCT.9017.58.3	COVID_B1	34	-0.124355	0.0395697	0.0249012	0.495591	-0.8381	0.1342	4.23376e-10	0.20145	0.28585	0.480972	Yes	Not assessed
2:135271002:C:T	rs115458360	LCT.9017.58.3	COVID_B1	34	-0.124355	0.0395697	0.0249012	0.495591	-0.7301	0.1181	6.32748e-10	0.16948	0.21522	0.431005	Yes	Not assessed
2:135335864:T:G	rs74789552	LCT.9017.58.3	COVID_B1	34	-0.124355	0.0395697	0.0249012	0.495591	-0.5336	0.1083	8.34785e-07	-0.12226	0.24709	0.620742	Yes	Not assessed
2:135348030:G:A	rs111911277	LCT.9017.58.3	COVID_B1	34	-0.124355	0.0395697	0.0249012	0.495591	-1.0564	0.1461	4.80638e-13	0.22828	0.25908	0.378254	Yes	Not assessed
2:135418191:T:G	rs116470115	LCT.9017.58.3	COVID_B1	34	-0.124355	0.0395697	0.0249012	0.495591	-0.8098	0.1156	2.4665e-12	0.16064	0.25449	0.527895	Yes	Not assessed
2:135666400:A:G	rs145573563	LCT.9017.58.3	COVID_B1	34	-0.124355	0.0395697	0.0249012	0.495591	-0.6745	0.1153	4.91701e-09	0.20699	0.23428	0.376958	Yes	Not assessed
2:135709261:C:G	rs6735935	LCT.9017.58.3	COVID_B1	34	-0.124355	0.0395697	0.0249012	0.495591	-0.7057	0.0989	9.64427e-13	0.23327	0.08001	0.00355107	Yes	Not assessed
2:135746993:TTAG:T	rs201482431	LCT.9017.58.3	COVID_B1	34	-0.124355	0.0395697	0.0249012	0.495591	-0.6258	0.0941	2.92353e-11	0.18284	0.21831	0.402298	Yes	Not assessed
2:135772821:G:A	rs60996006	LCT.9017.58.3	COVID_B1	34	-0.124355	0.0395697	0.0249012	0.495591	-0.7674	0.1001	1.76982e-14	-0.19858	0.10379	0.0557114	Yes	Not assessed
2:135836074:A:G	rs148053295	LCT.9017.58.3	COVID_B1	34	-0.124355	0.0395697	0.0249012	0.495591	-0.7877	0.1235	1.79254e-10	0.17772	0.20673	0.38997	Yes	Not assessed
2:135857243:C:G	rs309181	LCT.9017.58.3	COVID_B1	34	-0.124355	0.0395697	0.0249012	0.495591	0.8028	0.0257	3.31559e-214	-0.18728	0.063178	0.0030335	Yes	Not assessed
2:135878655:G:C	rs147575785	LCT.9017.58.3	COVID_B1	34	-0.124355	0.0395697	0.0249012	0.495591	-0.7818	0.1332	4.37456e-09	0.064504	0.26678	0.808945	Yes	Not assessed
2:135900428:A:C	rs148959072	LCT.9017.58.3	COVID_B1	34	-0.124355	0.0395697	0.0249012	0.495591	-0.7799	0.1132	5.59589e-12	-0.33249	0.2301	0.148463	Yes	Not assessed
2:136005924:G:A	rs190509055	LCT.9017.58.3	COVID_B1	34	-0.124355	0.0395697	0.0249012	0.495591	-0.9812	0.1682	5.42664e-09	-0.26798	0.3322	0.419849	Yes	Not assessed
2:136017226:C:T	rs79141855	LCT.9017.58.3	COVID_B1	34	-0.124355	0.0395697	0.0249012	0.495591	-0.6991	0.1292	6.2677e-08	-0.11078	0.2635	0.674181	Yes	Not assessed
2:136040496:C:A	rs114413176	LCT.9017.58.3	COVID_B1	34	-0.124355	0.0395697	0.0249012	0.495591	-0.5742	0.0903	2.03331e-10	0.070052	0.15224	0.645414	Yes	Not assessed
2:136041948:G:A	rs62160867	LCT.9017.58.3	COVID_B1	34	-0.124355	0.0395697	0.0249012	0.495591	-0.6017	0.0716	4.3288e-17	0.26895	0.13388	0.044549	Yes	Not assessed
2:136043502:G:C	rs184538984	LCT.9017.58.3	COVID_B1	34	-0.124355	0.0395697	0.0249012	0.495591	-0.8665	0.1751	7.47489e-07	-0.34137	0.34991	0.329266	No	Not a missense variant or in LD with missense variants
2:136092084:A:C	rs72617027	LCT.9017.58.3	COVID_B1	34	-0.124355	0.0395697	0.0249012	0.495591	-0.4447	0.069	1.15656e-10	0.1398	0.080544	0.0826174	Yes	Not assessed
2:136136294:C:T	rs16832995	LCT.9017.58.3	COVID_B1	34	-0.124355	0.0395697	0.0249012	0.495591	-0.3561	0.0457	6.58928e-15	0.15241	0.07374	0.0387477	Yes	Not assessed
2:136172412:T:A	rs529560704	LCT.9017.58.3	COVID_B1	34	-0.124355	0.0395697	0.0249012	0.495591	-0.501	0.0772	8.60433e-11	0.032607	0.17958	0.855917	Yes	Not assessed
2:136172515:C:G	rs75082903	LCT.9017.58.3	COVID_B1	34	-0.124355	0.0395697	0.0249012	0.495591	-0.3662	0.07	1.68205e-07	-0.019707	0.12344	0.873158	Yes	Not assessed
2:136256642:CT:C	rs149343241	LCT.9017.58.3	COVID_B1	34	-0.124355	0.0395697	0.0249012	0.495591	-0.2979	0.0369	6.84957e-16	0.091375	0.070832	0.197042	Yes	Not assessed
2:136281660:C:A	rs10206655	LCT.9017.58.3	COVID_B1	34	-0.124355	0.0395697	0.0249012	0.495591	-0.4259	0.0579	1.89807e-13	0.026178	0.076592	0.732513	Yes	Not assessed
2:136307639:G:A	rs116134631	LCT.9017.58.3	COVID_B1	34	-0.124355	0.0395697	0.0249012	0.495591	-0.4014	0.081	7.21239e-07	-0.016699	0.15492	0.914161	Yes	Not assessed
2:136316562:G:A	rs6708702	LCT.9017.58.3	COVID_B1	34	-0.124355	0.0395697	0.0249012	0.495591	-0.1328	0.0269	7.94136e-07	0.034526	0.042413	0.41562	Yes	Not assessed
2:136396155:C:T	rs10170322	LCT.9017.58.3	COVID_B1	34	-0.124355	0.0395697	0.0249012	0.495591	-0.144	0.0288	5.73303e-07	0.034431	0.066506	0.604659	Yes	Not assessed
2:136400414:A:G	rs1949297	LCT.9017.58.3	COVID_B1	34	-0.124355	0.0395697	0.0249012	0.495591	0.2226	0.0256	3.45877e-18	-0.076735	0.043998	0.0811492	Yes	Not assessed
2:136423381:C:G	rs13015216	LCT.9017.58.3	COVID_B1	34	-0.124355	0.0395697	0.0249012	0.495591	0.2527	0.0267	2.95196e-21	-0.011059	0.044825	0.805129	Yes	Not assessed
2:136644762:A:G	rs7597355	LCT.9017.58.3	COVID_B1	34	-0.124355	0.0395697	0.0249012	0.495591	0.189	0.0347	5.1317e-08	0.051358	0.05482	0.348837	Yes	Not assessed
1:169608095:A:G	rs2142760	SELL.4831.4.2	COVID_B1	11	0.152375	0.0516941	0.0274102	0.495591	-0.2401	0.025	7.69008e-22	-0.04978	0.052	0.338412	Yes	Not assessed
1:169696410:G:T	rs4987358	SELL.4831.4.2	COVID_B1	11	0.152375	0.0516941	0.0274102	0.495591	-0.5165	0.0261	3.68323e-87	-0.073934	0.043109	0.0863364	Yes	Not assessed
1:169698686:G:A	rs189331391	SELL.4831.4.2	COVID_B1	11	0.152375	0.0516941	0.0274102	0.495591	-0.5838	0.1287	5.72957e-06	-0.5542	0.31122	0.0749559	Yes	Not assessed
1:169738751:A:C	rs76798248	SELL.4831.4.2	COVID_B1	11	0.152375	0.0516941	0.0274102	0.495591	-0.5348	0.0978	4.54366e-08	-0.11801	0.2012	0.557519	Yes	Not assessed
1:169761346:G:A	rs4656717	SELL.4831.4.2	COVID_B1	11	0.152375	0.0516941	0.0274102	0.495591	0.3057	0.042	3.37374e-13	0.012794	0.069474	0.853892	Yes	Not assessed
1:169768244:A:C	rs562679239	SELL.4831.4.2	COVID_B1	11	0.152375	0.0516941	0.0274102	0.495591	0.3372	0.043	4.43919e-15	-0.033118	0.09259	0.720579	Yes	Not assessed
1:169837395:G:T	rs17602009	SELL.4831.4.2	COVID_B1	11	0.152375	0.0516941	0.0274102	0.495591	-0.4507	0.0919	9.3788e-07	-0.11341	0.19628	0.563401	Yes	Not assessed
1:169856388:A:G	rs12128754	SELL.4831.4.2	COVID_B1	11	0.152375	0.0516941	0.0274102	0.495591	0.2484	0.034	2.75453e-13	0.11579	0.051767	0.0253025	Yes	Not assessed
1:169906736:G:C	rs150754861	SELL.4831.4.2	COVID_B1	11	0.152375	0.0516941	0.0274102	0.495591	-0.4481	0.099	6.0036e-06	-0.15853	0.27834	0.568979	Yes	Not assessed
1:170084705:A:G	rs187579255	SELL.4831.4.2	COVID_B1	11	0.152375	0.0516941	0.0274102	0.495591	-0.7193	0.1276	1.7289e-08	0.0097395	0.29678	0.97382	Yes	Not assessed
1:170532434:A:G	rs148024641	SELL.4831.4.2	COVID_B1	11	0.152375	0.0516941	0.0274102	0.495591	-0.2414	0.0535	6.41739e-06	0.06938	0.10485	0.508159	Yes	Not assessed
2:134838398:GTTTT:G	rs1221107172	LCT.9017.58.3	COVID_B2	34	-0.0707857	0.0395697	0.0249012	0.495591	-0.2615	0.0385	1.1043e-11	-0.014014	0.037757	0.710516	Yes	Not assessed
2:134885144:G:A	rs111999127	LCT.9017.58.3	COVID_B2	34	-0.0707857	0.0395697	0.0249012	0.495591	-0.2855	0.0311	4.30834e-20	0.051334	0.030451	0.0918362	Yes	Not assessed
2:134925890:A:G	rs188166278	LCT.9017.58.3	COVID_B2	34	-0.0707857	0.0395697	0.0249012	0.495591	-0.6726	0.1138	3.41342e-09	0.10162	0.12872	0.42984	Yes	Not assessed
2:134995143:C:T	rs115220505	LCT.9017.58.3	COVID_B2	34	-0.0707857	0.0395697	0.0249012	0.495591	-0.3787	0.0671	1.66323e-08	-3.0132e-05	0.06633	0.999638	Yes	Not assessed
2:135121682:C:G	rs184273298	LCT.9017.58.3	COVID_B2	34	-0.0707857	0.0395697	0.0249012	0.495591	-0.814	0.1335	1.07822e-09	0.12921	0.12947	0.318283	Yes	Not assessed
2:135130978:G:C	rs146921207	LCT.9017.58.3	COVID_B2	34	-0.0707857	0.0395697	0.0249012	0.495591	-0.8381	0.1185	1.52086e-12	-0.090277	0.10615	0.395066	Yes	Not assessed
2:135245387:T:C	rs145643567	LCT.9017.58.3	COVID_B2	34	-0.0707857	0.0395697	0.0249012	0.495591	-0.8381	0.1342	4.23376e-10	0.064968	0.1203	0.589163	Yes	Not assessed
2:135308478:C:T	rs147991728	LCT.9017.58.3	COVID_B2	34	-0.0707857	0.0395697	0.0249012	0.495591	-1.0667	0.1633	6.48324e-11	-0.11562	0.17717	0.514018	Yes	Not assessed
2:135335864:T:G	rs74789552	LCT.9017.58.3	COVID_B2	34	-0.0707857	0.0395697	0.0249012	0.495591	-0.5336	0.1083	8.34785e-07	0.13088	0.096782	0.176274	Yes	Not assessed
2:135348030:G:A	rs111911277	LCT.9017.58.3	COVID_B2	34	-0.0707857	0.0395697	0.0249012	0.495591	-1.0564	0.1461	4.80638e-13	0.027712	0.11067	0.802276	Yes	Not assessed
2:135418191:T:G	rs116470115	LCT.9017.58.3	COVID_B2	34	-0.0707857	0.0395697	0.0249012	0.495591	-0.8098	0.1156	2.4665e-12	-0.061822	0.10362	0.55076	Yes	Not assessed
2:135709261:C:G	rs6735935	LCT.9017.58.3	COVID_B2	34	-0.0707857	0.0395697	0.0249012	0.495591	-0.7057	0.0989	9.64427e-13	0.17516	0.050855	0.000572535	Yes	Not assessed
2:135746993:TTAG:T	rs201482431	LCT.9017.58.3	COVID_B2	34	-0.0707857	0.0395697	0.0249012	0.495591	-0.6258	0.0941	2.92353e-11	0.060843	0.072153	0.399089	Yes	Not assessed
2:135836074:A:G	rs148053295	LCT.9017.58.3	COVID_B2	34	-0.0707857	0.0395697	0.0249012	0.495591	-0.7877	0.1235	1.79254e-10	0.061449	0.15861	0.698444	Yes	Not assessed
2:135857243:C:G	rs309181	LCT.9017.58.3	COVID_B2	34	-0.0707857	0.0395697	0.0249012	0.495591	0.8028	0.0257	3.31559e-214	-0.061666	0.029028	0.0336398	Yes	Not assessed
2:135878655:G:C	rs147575785	LCT.9017.58.3	COVID_B2	34	-0.0707857	0.0395697	0.0249012	0.495591	-0.7818	0.1332	4.37456e-09	-0.13129	0.114	0.249458	Yes	Not assessed
2:135895878:G:T	rs142411099	LCT.9017.58.3	COVID_B2	34	-0.0707857	0.0395697	0.0249012	0.495591	-0.9217	0.1398	4.31056e-11	0.027276	0.1964	0.889545	Yes	Not assessed
2:135900428:A:C	rs148959072	LCT.9017.58.3	COVID_B2	34	-0.0707857	0.0395697	0.0249012	0.495591	-0.7799	0.1132	5.59589e-12	-0.18135	0.12303	0.140473	Yes	Not assessed
2:136005924:G:A	rs190509055	LCT.9017.58.3	COVID_B2	34	-0.0707857	0.0395697	0.0249012	0.495591	-0.9812	0.1682	5.42664e-09	-0.18161	0.15925	0.254116	Yes	Not assessed
2:136017226:C:T	rs79141855	LCT.9017.58.3	COVID_B2	34	-0.0707857	0.0395697	0.0249012	0.495591	-0.6991	0.1292	6.2677e-08	0.0072294	0.099289	0.941956	Yes	Not assessed
2:136040496:C:A	rs114413176	LCT.9017.58.3	COVID_B2	34	-0.0707857	0.0395697	0.0249012	0.495591	-0.5742	0.0903	2.03331e-10	0.067854	0.079457	0.393121	Yes	Not assessed
2:136041948:G:A	rs62160867	LCT.9017.58.3	COVID_B2	34	-0.0707857	0.0395697	0.0249012	0.495591	-0.6017	0.0716	4.3288e-17	0.11925	0.096892	0.218416	Yes	Not assessed
2:136043502:G:C	rs184538984	LCT.9017.58.3	COVID_B2	34	-0.0707857	0.0395697	0.0249012	0.495591	-0.8665	0.1751	7.47489e-07	0.051975	0.12896	0.686925	No	Not a missense variant or in LD with missense variants
2:136056533:C:T	rs115711565	LCT.9017.58.3	COVID_B2	34	-0.0707857	0.0395697	0.0249012	0.495591	-0.5607	0.1032	5.53711e-08	0.10771	0.09524	0.258084	Yes	Not assessed
2:136092084:A:C	rs72617027	LCT.9017.58.3	COVID_B2	34	-0.0707857	0.0395697	0.0249012	0.495591	-0.4447	0.069	1.15656e-10	0.084767	0.047832	0.0763644	Yes	Not assessed
2:136136294:C:T	rs16832995	LCT.9017.58.3	COVID_B2	34	-0.0707857	0.0395697	0.0249012	0.495591	-0.3561	0.0457	6.58928e-15	0.01945	0.039426	0.62178	Yes	Not assessed
2:136172412:T:A	rs529560704	LCT.9017.58.3	COVID_B2	34	-0.0707857	0.0395697	0.0249012	0.495591	-0.501	0.0772	8.60433e-11	0.021614	0.079484	0.785677	Yes	Not assessed
2:136172515:C:G	rs75082903	LCT.9017.58.3	COVID_B2	34	-0.0707857	0.0395697	0.0249012	0.495591	-0.3662	0.07	1.68205e-07	0.033114	0.058968	0.574417	Yes	Not assessed
2:136256642:CT:C	rs149343241	LCT.9017.58.3	COVID_B2	34	-0.0707857	0.0395697	0.0249012	0.495591	-0.2979	0.0369	6.84957e-16	0.069158	0.035037	0.0483981	Yes	Not assessed
2:136281660:C:A	rs10206655	LCT.9017.58.3	COVID_B2	34	-0.0707857	0.0395697	0.0249012	0.495591	-0.4259	0.0579	1.89807e-13	-0.024313	0.040375	0.547055	Yes	Not assessed
2:136307639:G:A	rs116134631	LCT.9017.58.3	COVID_B2	34	-0.0707857	0.0395697	0.0249012	0.495591	-0.4014	0.081	7.21239e-07	0.12341	0.079279	0.119553	Yes	Not assessed
2:136316562:G:A	rs6708702	LCT.9017.58.3	COVID_B2	34	-0.0707857	0.0395697	0.0249012	0.495591	-0.1328	0.0269	7.94136e-07	0.020204	0.022023	0.358931	Yes	Not assessed
2:136396155:C:T	rs10170322	LCT.9017.58.3	COVID_B2	34	-0.0707857	0.0395697	0.0249012	0.495591	-0.144	0.0288	5.73303e-07	0.063783	0.045793	0.163664	Yes	Not assessed
2:136400414:A:G	rs1949297	LCT.9017.58.3	COVID_B2	34	-0.0707857	0.0395697	0.0249012	0.495591	0.2226	0.0256	3.45877e-18	-0.040329	0.027003	0.135306	Yes	Not assessed
2:136423381:C:G	rs13015216	LCT.9017.58.3	COVID_B2	34	-0.0707857	0.0395697	0.0249012	0.495591	0.2527	0.0267	2.95196e-21	0.027229	0.025482	0.285269	Yes	Not assessed
2:136644762:A:G	rs7597355	LCT.9017.58.3	COVID_B2	34	-0.0707857	0.0395697	0.0249012	0.495591	0.189	0.0347	5.1317e-08	0.00088876	0.029998	0.976364	Yes	Not assessed
11:119971851:C:T	rs116893335	OAF.6414.8.3	COVID_B2	7	-0.097931	0.0508214	0.0247368	0.495591	0.8331	0.1677	6.77169e-07	0.15256	0.19242	0.427866	Yes	Not assessed
11:120108035:T:G	rs605742	OAF.6414.8.3	COVID_B2	7	-0.097931	0.0508214	0.0247368	0.495591	-0.1896	0.0427	8.98415e-06	-0.00086151	0.041536	0.983452	Yes	Not assessed
11:120139944:G:C	rs77379157	OAF.6414.8.3	COVID_B2	7	-0.097931	0.0508214	0.0247368	0.495591	-0.2842	0.064	8.9698e-06	0.011285	0.07342	0.877843	Yes	Not assessed
11:120153773:G:GC	rs71301642	OAF.6414.8.3	COVID_B2	7	-0.097931	0.0508214	0.0247368	0.495591	-0.3459	0.0676	3.10658e-07	-0.036307	0.082629	0.660373	Yes	Not assessed
11:120185708:A:T	rs2444239	OAF.6414.8.3	COVID_B2	7	-0.097931	0.0508214	0.0247368	0.495591	0.3699	0.0243	2.5183e-52	-0.026509	0.022202	0.232481	Yes	Not assessed
11:120188786:G:A	rs10892546	OAF.6414.8.3	COVID_B2	7	-0.097931	0.0508214	0.0247368	0.495591	-0.4965	0.1049	2.21139e-06	0.051377	0.06032	0.394358	Yes	Not assessed
11:120227620:C:T	rs117554512	OAF.6414.8.3	COVID_B2	7	-0.097931	0.0508214	0.0247368	0.495591	0.6816	0.0431	2.47615e-56	-0.079575	0.038511	0.0388008	Yes	Not assessed
19:40402215:A:G	rs184390842	MIA.2687.2.1	COVID_B2	12	-0.0533652	0.0368464	0.0199972	0.495591	0.2937	0.066	8.58703e-06	0.13251	0.0699	0.0579986	Yes	Not assessed
19:40531367:G:C	rs112093859	MIA.2687.2.1	COVID_B2	12	-0.0533652	0.0368464	0.0199972	0.495591	0.5003	0.1093	4.70993e-06	-0.051663	0.070658	0.464675	Yes	Not assessed
19:40644628:C:T	rs112395012	MIA.2687.2.1	COVID_B2	12	-0.0533652	0.0368464	0.0199972	0.495591	0.2183	0.0439	6.60387e-07	-0.093274	0.035937	0.00944571	Yes	Not assessed
19:40659987:G:A	rs183384892	MIA.2687.2.1	COVID_B2	12	-0.0533652	0.0368464	0.0199972	0.495591	1.5053	0.1792	4.46054e-17	-0.19553	0.21719	0.367976	No	Not a missense variant or in LD with missense variants
19:40700850:A:C	rs2604885	MIA.2687.2.1	COVID_B2	12	-0.0533652	0.0368464	0.0199972	0.495591	0.194	0.0251	1.08323e-14	0.0041831	0.021584	0.846328	Yes	Not assessed
19:40769143:T:C	rs2604877	MIA.2687.2.1	COVID_B2	12	-0.0533652	0.0368464	0.0199972	0.495591	1.4417	0.0424	2.05598e-253	-0.062235	0.037595	0.0978421	Yes	Not assessed
19:40789954:G:T	rs7245595	MIA.2687.2.1	COVID_B2	12	-0.0533652	0.0368464	0.0199972	0.495591	-0.2553	0.0257	2.96572e-23	0.012175	0.025425	0.632039	Yes	Not assessed
19:40833083:C:G	rs2258380	MIA.2687.2.1	COVID_B2	12	-0.0533652	0.0368464	0.0199972	0.495591	-0.2252	0.0296	2.78137e-14	0.011742	0.03036	0.698935	Yes	Not assessed
19:40919919:C:T	rs138937335	MIA.2687.2.1	COVID_B2	12	-0.0533652	0.0368464	0.0199972	0.495591	0.6634	0.092	5.55957e-13	-0.11664	0.0846	0.16798	Yes	Not assessed
19:40920139:G:GT	rs55779134	MIA.2687.2.1	COVID_B2	12	-0.0533652	0.0368464	0.0199972	0.495591	-0.1578	0.0258	9.57855e-10	0.014153	0.027083	0.601267	Yes	Not assessed
19:41008915:T:C	rs4061281	MIA.2687.2.1	COVID_B2	12	-0.0533652	0.0368464	0.0199972	0.495591	0.2162	0.0282	1.76524e-14	0.021881	0.027843	0.431943	Yes	Not assessed
19:41360424:G:C	rs112293892	MIA.2687.2.1	COVID_B2	12	-0.0533652	0.0368464	0.0199972	0.495591	0.3278	0.0635	2.44058e-07	0.055683	0.065912	0.398218	Yes	Not assessed
8:62800107:T:C	rs7816541	GGH.9370.69.3	COVID_C1	9	0.069518	0.054081	0.0237123	0.495591	-0.1291	0.0249	2.16318e-07	0.0061035	0.018568	0.742374	Yes	Not assessed
8:62891646:A:T	rs17273723	GGH.9370.69.3	COVID_C1	9	0.069518	0.054081	0.0237123	0.495591	-0.2889	0.0649	8.52869e-06	-0.061771	0.050353	0.219913	Yes	Not assessed
8:63011205:T:C	rs10957266	GGH.9370.69.3	COVID_C1	9	0.069518	0.054081	0.0237123	0.495591	0.7985	0.0456	1.18174e-68	0.077868	0.02774	0.00499951	Yes	Not assessed
8:63053066:A:G	rs7001383	GGH.9370.69.3	COVID_C1	9	0.069518	0.054081	0.0237123	0.495591	-0.3719	0.0249	1.92912e-50	-0.0026694	0.018663	0.886265	Yes	Not assessed
8:63120681:G:C	rs148184939	GGH.9370.69.3	COVID_C1	9	0.069518	0.054081	0.0237123	0.495591	-0.6101	0.0758	8.36011e-16	0.058624	0.067403	0.384435	Yes	Not assessed
8:63135620:T:C	rs192554442	GGH.9370.69.3	COVID_C1	9	0.069518	0.054081	0.0237123	0.495591	-0.5354	0.086	4.79773e-10	-0.059735	0.066683	0.370357	Yes	Not assessed
8:63402500:G:C	rs533884861	GGH.9370.69.3	COVID_C1	9	0.069518	0.054081	0.0237123	0.495591	0.7414	0.1547	1.64714e-06	0.15551	0.14336	0.278032	No	Not a missense variant or in LD with missense variants
8:63442061:G:A	rs1560506	GGH.9370.69.3	COVID_C1	9	0.069518	0.054081	0.0237123	0.495591	-0.1244	0.0265	2.67469e-06	-0.00092513	0.01711	0.95688	Yes	Not assessed
19:5573333:C:T	rs8112148	FUT3.4548.4.2	COVID_D1	25	0.0765623	0.0414436	0.0154743	0.495591	-0.1396	0.03	3.26612e-06	-0.010779	0.031555	0.732656	Yes	Not assessed
19:5759405:A:T	rs3097893	FUT3.4548.4.2	COVID_D1	25	0.0765623	0.0414436	0.0154743	0.495591	0.2339	0.0325	6.15865e-13	-0.019047	0.039002	0.625295	Yes	Not assessed
19:5764739:G:A	rs147124149	FUT3.4548.4.2	COVID_D1	25	0.0765623	0.0414436	0.0154743	0.495591	-0.3097	0.0629	8.4928e-07	-0.13791	0.089444	0.123108	Yes	Not assessed
19:5790861:C:T	rs185897394	FUT3.4548.4.2	COVID_D1	25	0.0765623	0.0414436	0.0154743	0.495591	-1.055	0.1914	3.54745e-08	-0.15894	0.16948	0.348342	Yes	Not assessed
19:5810373:G:A	rs6510858	FUT3.4548.4.2	COVID_D1	25	0.0765623	0.0414436	0.0154743	0.495591	-0.1931	0.0313	6.85804e-10	0.036834	0.039313	0.348788	Yes	Not assessed
19:5810465:C:T	rs144763935	FUT3.4548.4.2	COVID_D1	25	0.0765623	0.0414436	0.0154743	0.495591	0.4791	0.0881	5.38401e-08	-0.060551	0.14425	0.674658	Yes	Not assessed
19:5817525:G:T	rs146715395	FUT3.4548.4.2	COVID_D1	25	0.0765623	0.0414436	0.0154743	0.495591	-0.6874	0.0839	2.5461e-16	0.026928	0.14863	0.85623	Yes	Not assessed
19:5822697:C:G	rs2436519	FUT3.4548.4.2	COVID_D1	25	0.0765623	0.0414436	0.0154743	0.495591	-0.286	0.0262	9.66271e-28	-0.072203	0.02696	0.00740294	Yes	Not assessed
19:5834535:C:T	rs143814846	FUT3.4548.4.2	COVID_D1	25	0.0765623	0.0414436	0.0154743	0.495591	-0.6917	0.1493	3.60485e-06	0.17302	0.16003	0.27962	Yes	Not assessed
19:5838649:G:T	rs147625395	FUT3.4548.4.2	COVID_D1	25	0.0765623	0.0414436	0.0154743	0.495591	-0.7873	0.096	2.38313e-16	-0.17212	0.12841	0.180117	Yes	Not assessed
19:5839928:C:T	rs112358826	FUT3.4548.4.2	COVID_D1	25	0.0765623	0.0414436	0.0154743	0.495591	-0.8036	0.1156	3.61276e-12	0.1532	0.14352	0.28577	Yes	Not assessed
19:5840608:C:T	rs708686	FUT3.4548.4.2	COVID_D1	25	0.0765623	0.0414436	0.0154743	0.495591	-0.853	0.0242	3.69035e-272	-0.055403	0.029693	0.0620609	Yes	Not assessed
19:5840622:G:A	rs369325804	FUT3.4548.4.2	COVID_D1	25	0.0765623	0.0414436	0.0154743	0.495591	-0.9539	0.1717	2.76628e-08	-0.36203	0.21975	0.0994629	No	Not a missense variant or in LD with missense variants
19:5842308:T:A	rs28381972	FUT3.4548.4.2	COVID_D1	25	0.0765623	0.0414436	0.0154743	0.495591	0.3012	0.0465	9.33046e-11	0.039453	0.065978	0.549859	Yes	Not assessed
19:5844332:C:T	rs3745635	FUT3.4548.4.2	COVID_D1	25	0.0765623	0.0414436	0.0154743	0.495591	-0.7087	0.0944	6.03062e-14	-0.10969	0.13265	0.408286	Yes	Not assessed
19:5844793:C:G	rs145362171	FUT3.4548.4.2	COVID_D1	25	0.0765623	0.0414436	0.0154743	0.495591	-0.6871	0.1306	1.43194e-07	-0.0294	0.19456	0.879889	Yes	Not assessed
19:5850335:C:T	rs117095068	FUT3.4548.4.2	COVID_D1	25	0.0765623	0.0414436	0.0154743	0.495591	0.4766	0.1002	1.96991e-06	0.17023	0.15975	0.286603	Yes	Not assessed
19:5852910:G:A	rs28742583	FUT3.4548.4.2	COVID_D1	25	0.0765623	0.0414436	0.0154743	0.495591	-0.6555	0.0754	3.51027e-18	-0.04078	0.13865	0.768665	Yes	Not assessed
19:5856563:C:T	rs708687	FUT3.4548.4.2	COVID_D1	25	0.0765623	0.0414436	0.0154743	0.495591	-0.2941	0.033	5.00654e-19	-0.051654	0.039603	0.192133	Yes	Not assessed
19:5856726:C:G	rs112707843	FUT3.4548.4.2	COVID_D1	25	0.0765623	0.0414436	0.0154743	0.495591	0.2369	0.0404	4.52225e-09	-0.050622	0.050175	0.313018	Yes	Not assessed
19:5860366:C:G	rs74174349	FUT3.4548.4.2	COVID_D1	25	0.0765623	0.0414436	0.0154743	0.495591	0.5586	0.0963	6.6069e-09	0.13985	0.11244	0.213583	Yes	Not assessed
19:5867902:G:A	rs778972	FUT3.4548.4.2	COVID_D1	25	0.0765623	0.0414436	0.0154743	0.495591	0.1769	0.0296	2.28191e-09	0.01926	0.031309	0.53845	Yes	Not assessed
19:5878269:C:T	rs72989043	FUT3.4548.4.2	COVID_D1	25	0.0765623	0.0414436	0.0154743	0.495591	-0.2071	0.0421	8.68809e-07	0.059483	0.060116	0.322433	Yes	Not assessed
19:5990944:T:C	rs8108685	FUT3.4548.4.2	COVID_D1	25	0.0765623	0.0414436	0.0154743	0.495591	-0.3544	0.0594	2.42649e-09	-0.014774	0.083223	0.859098	Yes	Not assessed
19:5573333:C:T	rs8112148	FUT3.4548.4.2	COVID_A1	25	-0.418665	0.0414436	0.0154743	0.495591	-0.1396	0.03	3.26612e-06	0.040238	0.16136	0.803076	Yes	Not assessed
19:5759405:A:T	rs3097893	FUT3.4548.4.2	COVID_A1	25	-0.418665	0.0414436	0.0154743	0.495591	0.2339	0.0325	6.15865e-13	-0.18322	0.22798	0.421589	Yes	Not assessed
19:5764739:G:A	rs147124149	FUT3.4548.4.2	COVID_A1	25	-0.418665	0.0414436	0.0154743	0.495591	-0.3097	0.0629	8.4928e-07	0.19793	0.33504	0.554678	Yes	Not assessed
19:5790861:C:T	rs185897394	FUT3.4548.4.2	COVID_A1	25	-0.418665	0.0414436	0.0154743	0.495591	-1.055	0.1914	3.54745e-08	0.24744	0.95965	0.796527	Yes	Not assessed
19:5810373:G:A	rs6510858	FUT3.4548.4.2	COVID_A1	25	-0.418665	0.0414436	0.0154743	0.495591	-0.1931	0.0313	6.85804e-10	-0.12725	0.18608	0.494073	Yes	Not assessed
19:5810465:C:T	rs144763935	FUT3.4548.4.2	COVID_A1	25	-0.418665	0.0414436	0.0154743	0.495591	0.4791	0.0881	5.38401e-08	-0.31873	0.77795	0.682022	Yes	Not assessed
19:5817525:G:T	rs146715395	FUT3.4548.4.2	COVID_A1	25	-0.418665	0.0414436	0.0154743	0.495591	-0.6874	0.0839	2.5461e-16	-0.14161	0.762	0.85257	Yes	Not assessed
19:5822697:C:G	rs2436519	FUT3.4548.4.2	COVID_A1	25	-0.418665	0.0414436	0.0154743	0.495591	-0.286	0.0262	9.66271e-28	0.11287	0.15006	0.451951	Yes	Not assessed
19:5838649:G:T	rs147625395	FUT3.4548.4.2	COVID_A1	25	-0.418665	0.0414436	0.0154743	0.495591	-0.7873	0.096	2.38313e-16	0.88451	0.55296	0.109689	Yes	Not assessed
19:5839928:C:T	rs112358826	FUT3.4548.4.2	COVID_A1	25	-0.418665	0.0414436	0.0154743	0.495591	-0.8036	0.1156	3.61276e-12	-0.98276	0.64313	0.12649	Yes	Not assessed
19:5840608:C:T	rs708686	FUT3.4548.4.2	COVID_A1	25	-0.418665	0.0414436	0.0154743	0.495591	-0.853	0.0242	3.69035e-272	0.37166	0.15289	0.0150615	Yes	Not assessed
19:5842308:T:A	rs28381972	FUT3.4548.4.2	COVID_A1	25	-0.418665	0.0414436	0.0154743	0.495591	0.3012	0.0465	9.33046e-11	-0.41682	0.41451	0.314621	Yes	Not assessed
19:5844332:C:T	rs3745635	FUT3.4548.4.2	COVID_A1	25	-0.418665	0.0414436	0.0154743	0.495591	-0.7087	0.0944	6.03062e-14	-0.038921	0.59293	0.947663	Yes	Not assessed
19:5844793:C:G	rs145362171	FUT3.4548.4.2	COVID_A1	25	-0.418665	0.0414436	0.0154743	0.495591	-0.6871	0.1306	1.43194e-07	0.59021	0.57641	0.305863	Yes	Not assessed
19:5850335:C:T	rs117095068	FUT3.4548.4.2	COVID_A1	25	-0.418665	0.0414436	0.0154743	0.495591	0.4766	0.1002	1.96991e-06	0.3866	0.61776	0.53144	Yes	Not assessed
19:5852910:G:A	rs28742583	FUT3.4548.4.2	COVID_A1	25	-0.418665	0.0414436	0.0154743	0.495591	-0.6555	0.0754	3.51027e-18	0.092762	0.58282	0.873542	Yes	Not assessed
19:5856563:C:T	rs708687	FUT3.4548.4.2	COVID_A1	25	-0.418665	0.0414436	0.0154743	0.495591	-0.2941	0.033	5.00654e-19	-0.01762	0.21766	0.93548	Yes	Not assessed
19:5856726:C:G	rs112707843	FUT3.4548.4.2	COVID_A1	25	-0.418665	0.0414436	0.0154743	0.495591	0.2369	0.0404	4.52225e-09	0.17536	0.25989	0.499837	Yes	Not assessed
19:5860366:C:G	rs74174349	FUT3.4548.4.2	COVID_A1	25	-0.418665	0.0414436	0.0154743	0.495591	0.5586	0.0963	6.6069e-09	-0.74584	0.87406	0.39349	Yes	Not assessed
19:5867902:G:A	rs778972	FUT3.4548.4.2	COVID_A1	25	-0.418665	0.0414436	0.0154743	0.495591	0.1769	0.0296	2.28191e-09	0.034643	0.18934	0.854824	Yes	Not assessed
19:5878269:C:T	rs72989043	FUT3.4548.4.2	COVID_A1	25	-0.418665	0.0414436	0.0154743	0.495591	-0.2071	0.0421	8.68809e-07	0.10762	0.27572	0.696297	Yes	Not assessed
19:5990944:T:C	rs8108685	FUT3.4548.4.2	COVID_A1	25	-0.418665	0.0414436	0.0154743	0.495591	-0.3544	0.0594	2.42649e-09	-0.050045	0.43502	0.908413	Yes	Not assessed
1:169608095:A:G	rs2142760	SELL.4831.4.2	COVID_A1	11	0.542338	0.0516941	0.0274102	0.495591	-0.2401	0.025	7.69008e-22	-0.21516	0.15103	0.154268	Yes	Not assessed
1:169696410:G:T	rs4987358	SELL.4831.4.2	COVID_A1	11	0.542338	0.0516941	0.0274102	0.495591	-0.5165	0.0261	3.68323e-87	-0.24269	0.16051	0.130536	Yes	Not assessed
1:169698686:G:A	rs189331391	SELL.4831.4.2	COVID_A1	11	0.542338	0.0516941	0.0274102	0.495591	-0.5838	0.1287	5.72957e-06	-0.84907	0.92642	0.359401	Yes	Not assessed
1:169702272:A:G	rs4987320	SELL.4831.4.2	COVID_A1	11	0.542338	0.0516941	0.0274102	0.495591	0.2978	0.0427	3.07531e-12	0.13603	0.23296	0.559274	Yes	Not assessed
1:169768244:A:C	rs562679239	SELL.4831.4.2	COVID_A1	11	0.542338	0.0516941	0.0274102	0.495591	0.3372	0.043	4.43919e-15	-0.25738	0.36276	0.478011	Yes	Not assessed
1:169837395:G:T	rs17602009	SELL.4831.4.2	COVID_A1	11	0.542338	0.0516941	0.0274102	0.495591	-0.4507	0.0919	9.3788e-07	-0.20093	0.71867	0.779795	Yes	Not assessed
1:169856388:A:G	rs12128754	SELL.4831.4.2	COVID_A1	11	0.542338	0.0516941	0.0274102	0.495591	0.2484	0.034	2.75453e-13	0.11442	0.21583	0.596015	Yes	Not assessed
1:170084705:A:G	rs187579255	SELL.4831.4.2	COVID_A1	11	0.542338	0.0516941	0.0274102	0.495591	-0.7193	0.1276	1.7289e-08	-1.3032	0.79996	0.103296	Yes	Not assessed
1:170532434:A:G	rs148024641	SELL.4831.4.2	COVID_A1	11	0.542338	0.0516941	0.0274102	0.495591	-0.2414	0.0535	6.41739e-06	-0.14261	0.34854	0.682419	Yes	Not assessed
19:40402215:A:G	rs184390842	MIA.2687.2.1	COVID_A1	12	0.384334	0.0368464	0.0199972	0.495591	0.2937	0.066	8.58703e-06	0.73742	0.47689	0.12203	Yes	Not assessed
19:40531367:G:C	rs112093859	MIA.2687.2.1	COVID_A1	12	0.384334	0.0368464	0.0199972	0.495591	0.5003	0.1093	4.70993e-06	0.16498	0.65416	0.800885	Yes	Not assessed
19:40538126:C:T	rs4803345	MIA.2687.2.1	COVID_A1	12	0.384334	0.0368464	0.0199972	0.495591	0.5037	0.0896	1.8914e-08	0.008455	0.42053	0.983959	Yes	Not assessed
19:40693872:C:CT	rs77595071	MIA.2687.2.1	COVID_A1	12	0.384334	0.0368464	0.0199972	0.495591	0.254	0.0564	6.68289e-06	0.24553	0.33638	0.46544	Yes	Not assessed
19:40700850:A:C	rs2604885	MIA.2687.2.1	COVID_A1	12	0.384334	0.0368464	0.0199972	0.495591	0.194	0.0251	1.08323e-14	-0.028535	0.15286	0.851916	Yes	Not assessed
19:40769143:T:C	rs2604877	MIA.2687.2.1	COVID_A1	12	0.384334	0.0368464	0.0199972	0.495591	1.4417	0.0424	2.05598e-253	0.63746	0.27641	0.0210988	Yes	Not assessed
19:40789954:G:T	rs7245595	MIA.2687.2.1	COVID_A1	12	0.384334	0.0368464	0.0199972	0.495591	-0.2553	0.0257	2.96572e-23	-0.033368	0.15281	0.827147	Yes	Not assessed
19:40833083:C:G	rs2258380	MIA.2687.2.1	COVID_A1	12	0.384334	0.0368464	0.0199972	0.495591	-0.2252	0.0296	2.78137e-14	0.074333	0.17079	0.663395	Yes	Not assessed
19:40919919:C:T	rs138937335	MIA.2687.2.1	COVID_A1	12	0.384334	0.0368464	0.0199972	0.495591	0.6634	0.092	5.55957e-13	-1.1846	0.60705	0.051009	Yes	Not assessed
19:40920139:G:GT	rs55779134	MIA.2687.2.1	COVID_A1	12	0.384334	0.0368464	0.0199972	0.495591	-0.1578	0.0258	9.57855e-10	-0.23841	0.21004	0.256346	Yes	Not assessed
19:41008915:T:C	rs4061281	MIA.2687.2.1	COVID_A1	12	0.384334	0.0368464	0.0199972	0.495591	0.2162	0.0282	1.76524e-14	0.056046	0.20861	0.788188	Yes	Not assessed
19:41360424:G:C	rs112293892	MIA.2687.2.1	COVID_A1	12	0.384334	0.0368464	0.0199972	0.495591	0.3278	0.0635	2.44058e-07	-0.031582	0.46647	0.946021	Yes	Not assessed
17:7416006:C:T	rs76733190	ATP1B2.7218.87.3	COVID_A1	5	1.35546	0.459812	0.00319992	0.519129	0.3555	0.0646	3.73179e-08	1.1431	0.47714	0.0165872	Yes	Not assessed
17:7588228:T:C	rs78555071	ATP1B2.7218.87.3	COVID_A1	5	1.35546	0.459812	0.00319992	0.519129	0.3292	0.0568	6.80065e-09	0.18821	0.32065	0.557228	Yes	Not assessed
17:7608756:G:A	rs11653545	ATP1B2.7218.87.3	COVID_A1	5	1.35546	0.459812	0.00319992	0.519129	0.4917	0.0916	7.9657e-08	0.83732	0.64191	0.192091	Yes	Not assessed
17:7651454:C:T	rs1642762	ATP1B2.7218.87.3	COVID_A1	5	1.35546	0.459812	0.00319992	0.519129	-0.2881	0.0255	1.34181e-29	-0.39679	0.14715	0.00700724	Yes	Not assessed
17:7668134:G:A	rs1614984	ATP1B2.7218.87.3	COVID_A1	5	1.35546	0.459812	0.00319992	0.519129	-0.1544	0.0251	7.68046e-10	-0.12223	0.15314	0.424778	Yes	Not assessed
17:1733780:A:G	rs3809871	SERPINF1.9211.19.3	COVID_A1	8	0.730757	0.314957	0.0203313	0.519129	0.1187	0.0247	1.54236e-06	0.10941	0.16417	0.505128	Yes	Not assessed
17:1762959:C:T	rs62088172	SERPINF1.9211.19.3	COVID_A1	8	0.730757	0.314957	0.0203313	0.519129	-0.4449	0.0251	2.68437e-70	-0.30492	0.1532	0.0465536	Yes	Not assessed
17:1775044:A:T	rs3891224	SERPINF1.9211.19.3	COVID_A1	8	0.730757	0.314957	0.0203313	0.519129	0.4585	0.0693	3.68645e-11	0.5553	0.33226	0.0946661	Yes	Not assessed
17:1793767:C:G	rs76253868	SERPINF1.9211.19.3	COVID_A1	8	0.730757	0.314957	0.0203313	0.519129	0.2938	0.0422	3.35272e-12	0.49189	0.28611	0.0855718	Yes	Not assessed
17:1809210:C:T	rs72822473	SERPINF1.9211.19.3	COVID_A1	8	0.730757	0.314957	0.0203313	0.519129	0.2789	0.0599	3.22266e-06	-0.33006	0.53822	0.539715	Yes	Not assessed
17:1810662:C:T	rs149746603	SERPINF1.9211.19.3	COVID_A1	8	0.730757	0.314957	0.0203313	0.519129	-0.4952	0.1022	1.26356e-06	0.92942	0.99951	0.352435	Yes	Not assessed
17:1833336:T:A	rs146658825	SERPINF1.9211.19.3	COVID_A1	8	0.730757	0.314957	0.0203313	0.519129	-0.2833	0.0549	2.46566e-07	-0.27625	0.35442	0.435719	Yes	Not assessed
17:1878323:A:G	rs17338857	SERPINF1.9211.19.3	COVID_A1	8	0.730757	0.314957	0.0203313	0.519129	-0.2917	0.0647	6.52873e-06	0.27968	0.3287	0.394843	Yes	Not assessed
6:94581952:T:C	rs72933434	MANEA.8014.359.3	COVID_A1	18	-0.344915	0.14431	0.0168437	0.519129	-0.4557	0.089	3.05172e-07	0.11592	0.84863	0.89135	Yes	Not assessed
6:94672897:G:C	rs55733846	MANEA.8014.359.3	COVID_A1	18	-0.344915	0.14431	0.0168437	0.519129	-0.3092	0.057	5.8097e-08	-0.28549	0.35556	0.422015	Yes	Not assessed
6:94745633:C:T	rs145451537	MANEA.8014.359.3	COVID_A1	18	-0.344915	0.14431	0.0168437	0.519129	-0.7453	0.158	2.39244e-06	-0.49842	0.9258	0.590324	Yes	Not assessed
6:95431742:G:A	rs10498993	MANEA.8014.359.3	COVID_A1	18	-0.344915	0.14431	0.0168437	0.519129	-0.4467	0.0707	2.64548e-10	0.030219	0.47913	0.94971	Yes	Not assessed
6:95435809:C:T	rs2716079	MANEA.8014.359.3	COVID_A1	18	-0.344915	0.14431	0.0168437	0.519129	-0.2772	0.0263	5.65446e-26	0.067602	0.14802	0.647881	Yes	Not assessed
6:95560206:T:C	rs7748108	MANEA.8014.359.3	COVID_A1	18	-0.344915	0.14431	0.0168437	0.519129	-0.447	0.0277	1.39774e-58	0.20699	0.16401	0.206928	Yes	Not assessed
6:95575816:T:A	rs13205922	MANEA.8014.359.3	COVID_A1	18	-0.344915	0.14431	0.0168437	0.519129	-1.7002	0.0345	0	0.56073	0.26211	0.032412	Yes	Not assessed
6:95622045:G:A	rs7742378	MANEA.8014.359.3	COVID_A1	18	-0.344915	0.14431	0.0168437	0.519129	0.3309	0.0375	1.10442e-18	-0.22071	0.24913	0.375659	Yes	Not assessed
6:95651257:T:C	rs6569257	MANEA.8014.359.3	COVID_A1	18	-0.344915	0.14431	0.0168437	0.519129	0.3455	0.0322	7.37447e-27	-0.13533	0.19279	0.482707	Yes	Not assessed
6:95716355:T:G	rs79788128	MANEA.8014.359.3	COVID_A1	18	-0.344915	0.14431	0.0168437	0.519129	0.3736	0.0738	4.14162e-07	-0.39749	0.52429	0.448362	Yes	Not assessed
6:95763994:T:G	rs12209462	MANEA.8014.359.3	COVID_A1	18	-0.344915	0.14431	0.0168437	0.519129	0.4237	0.0523	5.43578e-16	-0.14396	0.60763	0.812718	Yes	Not assessed
6:95819740:C:G	rs79662282	MANEA.8014.359.3	COVID_A1	18	-0.344915	0.14431	0.0168437	0.519129	-0.3656	0.0486	5.36837e-14	-0.27331	0.26507	0.3025	Yes	Not assessed
6:95853611:G:A	rs7754801	MANEA.8014.359.3	COVID_A1	18	-0.344915	0.14431	0.0168437	0.519129	0.1869	0.0289	9.9883e-11	0.14909	0.16382	0.362778	Yes	Not assessed
6:95901651:A:G	rs80028478	MANEA.8014.359.3	COVID_A1	18	-0.344915	0.14431	0.0168437	0.519129	-0.5998	0.1081	2.88022e-08	0.61739	0.96658	0.522994	Yes	Not assessed
6:95925799:T:C	rs652439	MANEA.8014.359.3	COVID_A1	18	-0.344915	0.14431	0.0168437	0.519129	0.3089	0.0548	1.73177e-08	0.10302	0.26567	0.698183	Yes	Not assessed
6:95975550:G:C	rs637791	MANEA.8014.359.3	COVID_A1	18	-0.344915	0.14431	0.0168437	0.519129	0.2543	0.0359	1.40492e-12	-0.32928	0.19636	0.0935581	Yes	Not assessed
6:96012859:G:A	rs9404128	MANEA.8014.359.3	COVID_A1	18	-0.344915	0.14431	0.0168437	0.519129	-0.2033	0.0258	3.27788e-15	0.12952	0.1512	0.391658	Yes	Not assessed
6:96105758:G:C	rs9322667	MANEA.8014.359.3	COVID_A1	18	-0.344915	0.14431	0.0168437	0.519129	0.4829	0.1026	2.51848e-06	0.20843	0.75595	0.782764	Yes	Not assessed
22:29919747:T:C	rs245008	TCN2.5584.21.3	COVID_A1	24	-0.40058	0.159765	0.0121654	0.519129	0.1469	0.0246	2.35018e-09	-0.35337	0.16197	0.0291317	Yes	Not assessed
22:30212155:C:T	rs9614165	TCN2.5584.21.3	COVID_A1	24	-0.40058	0.159765	0.0121654	0.519129	0.1851	0.0292	2.312e-10	-0.22421	0.18786	0.232676	Yes	Not assessed
22:30397148:G:A	rs757660	TCN2.5584.21.3	COVID_A1	24	-0.40058	0.159765	0.0121654	0.519129	-0.1903	0.0271	2.18495e-12	-0.091675	0.16947	0.588541	Yes	Not assessed
22:30440461:G:A	rs150634171	TCN2.5584.21.3	COVID_A1	24	-0.40058	0.159765	0.0121654	0.519129	-0.5538	0.1136	1.08808e-06	0.63428	0.56461	0.26127	Yes	Not assessed
22:30499995:A:G	rs5749113	TCN2.5584.21.3	COVID_A1	24	-0.40058	0.159765	0.0121654	0.519129	-0.2515	0.0252	1.86169e-23	0.12354	0.15015	0.410635	Yes	Not assessed
22:30568916:A:G	rs2528456	TCN2.5584.21.3	COVID_A1	24	-0.40058	0.159765	0.0121654	0.519129	0.6923	0.0791	2.0921e-18	-0.6798	0.49287	0.167812	Yes	Not assessed
22:30592775:C:T	rs12484511	TCN2.5584.21.3	COVID_A1	24	-0.40058	0.159765	0.0121654	0.519129	-0.7378	0.0406	8.53593e-74	0.078111	0.24639	0.751227	Yes	Not assessed
22:30608841:C:G	rs5997702	TCN2.5584.21.3	COVID_A1	24	-0.40058	0.159765	0.0121654	0.519129	0.846	0.0683	3.09132e-35	-0.36972	0.43374	0.393992	Yes	Not assessed
22:30609001:G:A	rs117324970	TCN2.5584.21.3	COVID_A1	24	-0.40058	0.159765	0.0121654	0.519129	0.627	0.0697	2.3474e-19	0.36077	0.42717	0.398357	Yes	Not assessed
22:30616769:T:C	rs4820885	TCN2.5584.21.3	COVID_A1	24	-0.40058	0.159765	0.0121654	0.519129	-0.7247	0.0212	4.18599e-256	0.47551	0.1504	0.00156886	Yes	Not assessed
22:30622988:T:C	rs1131603	TCN2.5584.21.3	COVID_A1	24	-0.40058	0.159765	0.0121654	0.519129	-0.2636	0.0585	6.60664e-06	0.47718	0.28062	0.0890465	Yes	Not assessed
22:30628566:C:G	rs9621051	TCN2.5584.21.3	COVID_A1	24	-0.40058	0.159765	0.0121654	0.519129	-0.7247	0.0558	1.44141e-38	-0.14177	0.30714	0.644382	Yes	Not assessed
22:30633059:A:G	rs138426988	TCN2.5584.21.3	COVID_A1	24	-0.40058	0.159765	0.0121654	0.519129	0.647	0.0651	2.82898e-23	-0.18622	0.38171	0.625651	Yes	Not assessed
22:30643746:G:A	rs76738533	TCN2.5584.21.3	COVID_A1	24	-0.40058	0.159765	0.0121654	0.519129	-0.9041	0.083	1.24785e-27	-0.39417	0.39148	0.313997	Yes	Not assessed
22:30648478:G:A	rs9609030	TCN2.5584.21.3	COVID_A1	24	-0.40058	0.159765	0.0121654	0.519129	0.8981	0.0788	4.31743e-30	-0.78571	0.6658	0.237961	Yes	Not assessed
22:30678107:G:C	rs8138379	TCN2.5584.21.3	COVID_A1	24	-0.40058	0.159765	0.0121654	0.519129	0.2865	0.0253	9.96854e-30	-0.17674	0.14897	0.235459	Yes	Not assessed
22:30698401:T:C	rs112890161	TCN2.5584.21.3	COVID_A1	24	-0.40058	0.159765	0.0121654	0.519129	-0.5366	0.0848	2.48633e-10	0.1257	0.40888	0.75852	Yes	Not assessed
22:30741525:G:A	rs73154638	TCN2.5584.21.3	COVID_A1	24	-0.40058	0.159765	0.0121654	0.519129	0.3717	0.0676	3.82991e-08	-0.50821	0.43553	0.24326	Yes	Not assessed
22:30871681:TAGG:T	rs79532894	TCN2.5584.21.3	COVID_A1	24	-0.40058	0.159765	0.0121654	0.519129	-0.2059	0.0302	9.23933e-12	0.21406	0.21947	0.329387	Yes	Not assessed
22:30875563:C:G	rs5997798	TCN2.5584.21.3	COVID_A1	24	-0.40058	0.159765	0.0121654	0.519129	0.1538	0.0263	4.97791e-09	-0.21101	0.15886	0.184087	Yes	Not assessed
22:31075991:TGGCTATTATTAGGCCCGGC:T	rs199969593	TCN2.5584.21.3	COVID_A1	24	-0.40058	0.159765	0.0121654	0.519129	-0.3834	0.0762	4.86667e-07	-0.060021	0.48613	0.901737	Yes	Not assessed
22:31077183:G:A	rs5753453	TCN2.5584.21.3	COVID_A1	24	-0.40058	0.159765	0.0121654	0.519129	-0.2576	0.0504	3.2027e-07	-0.01285	0.34125	0.969962	Yes	Not assessed
22:31388413:G:A	rs7290752	TCN2.5584.21.3	COVID_A1	24	-0.40058	0.159765	0.0121654	0.519129	-0.3095	0.0603	2.85661e-07	-0.025579	0.33261	0.9387	Yes	Not assessed
22:31570288:T:C	rs2092905	TCN2.5584.21.3	COVID_A1	24	-0.40058	0.159765	0.0121654	0.519129	-0.1389	0.0292	1.96638e-06	0.309	0.17576	0.078734	Yes	Not assessed
7:48924154:T:C	rs28657937	VWC2.11121.56.3	COVID_A1	8	-0.680773	0.302787	0.0245534	0.519129	-0.1149	0.0254	6.07902e-06	-0.11063	0.19851	0.577321	Yes	Not assessed
7:49576607:G:A	rs10269783	VWC2.11121.56.3	COVID_A1	8	-0.680773	0.302787	0.0245534	0.519129	0.1788	0.0259	5.07456e-12	-0.31879	0.15354	0.0378693	Yes	Not assessed
7:49607997:C:T	rs12056163	VWC2.11121.56.3	COVID_A1	8	-0.680773	0.302787	0.0245534	0.519129	-0.1278	0.0282	5.84514e-06	-0.030981	0.16993	0.855335	Yes	Not assessed
7:49715389:G:A	rs1425882	VWC2.11121.56.3	COVID_A1	8	-0.680773	0.302787	0.0245534	0.519129	-0.1977	0.0248	1.56412e-15	0.11016	0.15655	0.481636	Yes	Not assessed
7:49718162:C:A	rs148681119	VWC2.11121.56.3	COVID_A1	8	-0.680773	0.302787	0.0245534	0.519129	0.7535	0.0862	2.30445e-18	-0.65436	0.53881	0.224574	Yes	Not assessed
7:49772968:C:A	rs79259707	VWC2.11121.56.3	COVID_A1	8	-0.680773	0.302787	0.0245534	0.519129	-0.5094	0.0352	1.83186e-47	0.46587	0.225	0.0384024	Yes	Not assessed
7:49778361:T:C	rs17663710	VWC2.11121.56.3	COVID_A1	8	-0.680773	0.302787	0.0245534	0.519129	-0.4841	0.0821	3.71365e-09	-0.31447	0.48542	0.517094	Yes	Not assessed
7:49802781:A:C	rs79731913	VWC2.11121.56.3	COVID_A1	8	-0.680773	0.302787	0.0245534	0.519129	0.3159	0.0498	2.24788e-10	0.15231	0.33134	0.645747	Yes	Not assessed
6:32446513:A:G	rs9268671	COL11A2.11278.4.3	COVID_A1	7	0.81548	0.321316	0.0111506	0.519129	0.1221	0.0263	3.44076e-06	0.11813	0.15942	0.458694	Yes	Not assessed
6:33009267:G:A	rs11753831	COL11A2.11278.4.3	COVID_A1	7	0.81548	0.321316	0.0111506	0.519129	0.3232	0.0419	1.22314e-14	0.42582	0.22988	0.0639745	Yes	Not assessed
6:33032658:T:G	rs9277036	COL11A2.11278.4.3	COVID_A1	7	0.81548	0.321316	0.0111506	0.519129	0.2854	0.0518	3.59543e-08	0.020118	0.28755	0.944223	Yes	Not assessed
6:33126619:G:A	rs115753837	COL11A2.11278.4.3	COVID_A1	7	0.81548	0.321316	0.0111506	0.519129	0.5943	0.0716	1.03867e-16	0.27721	0.35754	0.438147	Yes	Not assessed
6:33158082:G:T	rs3129205	COL11A2.11278.4.3	COVID_A1	7	0.81548	0.321316	0.0111506	0.519129	0.27	0.026	2.91341e-25	0.24037	0.15428	0.119231	Yes	Not assessed
6:33173698:C:T	rs970901	COL11A2.11278.4.3	COVID_A1	7	0.81548	0.321316	0.0111506	0.519129	0.146	0.0245	2.53501e-09	-0.17458	0.15102	0.247679	Yes	Not assessed
6:33361076:C:A	rs143233688	COL11A2.11278.4.3	COVID_A1	7	0.81548	0.321316	0.0111506	0.519129	0.8268	0.1715	1.42847e-06	1.0715	0.42646	0.0119864	Yes	Not assessed
6:30995699:G:C	rs146774270	C4A.C4B.4481.34.2	COVID_A1	24	0.539683	0.206494	0.00896079	0.519129	-0.3425	0.0749	4.81333e-06	0.054512	0.59086	0.926492	Yes	Not assessed
6:31011426:A:C	rs7739491	C4A.C4B.4481.34.2	COVID_A1	24	0.539683	0.206494	0.00896079	0.519129	0.1603	0.0261	8.16108e-10	-0.0092064	0.15552	0.952795	Yes	Not assessed
6:31268473:A:C	rs9394047	C4A.C4B.4481.34.2	COVID_A1	24	0.539683	0.206494	0.00896079	0.519129	0.3722	0.0474	4.08409e-15	0.28504	0.2721	0.294843	Yes	Not assessed
6:31303926:A:T	rs11962586	C4A.C4B.4481.34.2	COVID_A1	24	0.539683	0.206494	0.00896079	0.519129	-0.3455	0.0445	8.22627e-15	0.28229	0.34168	0.408701	Yes	Not assessed
6:31327176:C:T	rs116074669	C4A.C4B.4481.34.2	COVID_A1	24	0.539683	0.206494	0.00896079	0.519129	0.2942	0.053	2.84132e-08	0.46185	0.67128	0.491444	Yes	Not assessed
6:31347808:G:T	rs36119838	C4A.C4B.4481.34.2	COVID_A1	24	0.539683	0.206494	0.00896079	0.519129	0.2565	0.0449	1.11201e-08	0.071639	0.20789	0.730395	Yes	Not assessed
6:31381950:C:T	rs9266716	C4A.C4B.4481.34.2	COVID_A1	24	0.539683	0.206494	0.00896079	0.519129	-0.2208	0.0265	7.94373e-17	-0.048586	0.15545	0.754622	Yes	Not assessed
6:31515359:A:G	rs2844495	C4A.C4B.4481.34.2	COVID_A1	24	0.539683	0.206494	0.00896079	0.519129	0.2951	0.0258	2.70087e-30	0.14325	0.15411	0.352614	Yes	Not assessed
6:31636814:C:T	rs10885	C4A.C4B.4481.34.2	COVID_A1	24	0.539683	0.206494	0.00896079	0.519129	-0.3871	0.0302	1.30211e-37	-0.30714	0.21463	0.152424	Yes	Not assessed
6:31697675:G:A	rs805273	C4A.C4B.4481.34.2	COVID_A1	24	0.539683	0.206494	0.00896079	0.519129	0.5861	0.0549	1.32151e-26	0.45307	0.3392	0.181647	Yes	Not assessed
6:31773713:G:C	rs9469051	C4A.C4B.4481.34.2	COVID_A1	24	0.539683	0.206494	0.00896079	0.519129	0.3334	0.0353	3.56222e-21	0.39849	0.17242	0.0208241	Yes	Not assessed
6:31849037:G:A	rs190789983	C4A.C4B.4481.34.2	COVID_A1	24	0.539683	0.206494	0.00896079	0.519129	0.6602	0.1087	1.25076e-09	1.3301	0.75583	0.0784439	Yes	Not assessed
6:31977074:T:C	rs41315816	C4A.C4B.4481.34.2	COVID_A1	24	0.539683	0.206494	0.00896079	0.519129	0.4545	0.0511	5.87755e-19	0.90147	0.28733	0.00170452	Yes	Not assessed
6:32037872:A:G	rs396458	C4A.C4B.4481.34.2	COVID_A1	24	0.539683	0.206494	0.00896079	0.519129	0.4755	0.0349	2.85809e-42	0.15188	0.21407	0.478022	Yes	Not assessed
6:32062923:C:T	rs9267797	C4A.C4B.4481.34.2	COVID_A1	24	0.539683	0.206494	0.00896079	0.519129	-0.7688	0.1011	2.86335e-14	-0.85584	0.69355	0.217203	Yes	Not assessed
6:32162552:C:G	rs34129552	C4A.C4B.4481.34.2	COVID_A1	24	0.539683	0.206494	0.00896079	0.519129	0.5082	0.0723	2.07951e-12	0.010056	0.37705	0.978723	Yes	Not assessed
6:32211932:A:G	rs16869834	C4A.C4B.4481.34.2	COVID_A1	24	0.539683	0.206494	0.00896079	0.519129	-0.6193	0.0575	4.74754e-27	0.50363	0.33118	0.128332	Yes	Not assessed
6:32458242:C:T	rs148242149	C4A.C4B.4481.34.2	COVID_A1	24	0.539683	0.206494	0.00896079	0.519129	0.4726	0.0946	5.8601e-07	0.41484	0.35542	0.243137	Yes	Not assessed
6:32465869:C:T	rs41291802	C4A.C4B.4481.34.2	COVID_A1	24	0.539683	0.206494	0.00896079	0.519129	0.3131	0.0348	2.31703e-19	-0.29877	0.25996	0.250436	Yes	Not assessed
6:32644280:T:A	rs28371173	C4A.C4B.4481.34.2	COVID_A1	24	0.539683	0.206494	0.00896079	0.519129	0.3749	0.0343	8.28218e-28	0.63444	0.30059	0.0348025	Yes	Not assessed
6:32763847:T:G	rs1573646	C4A.C4B.4481.34.2	COVID_A1	24	0.539683	0.206494	0.00896079	0.519129	0.183	0.0246	1.01432e-13	0.060625	0.14596	0.677883	Yes	Not assessed
6:32800535:A:G	rs2857149	C4A.C4B.4481.34.2	COVID_A1	24	0.539683	0.206494	0.00896079	0.519129	0.1575	0.0262	1.83871e-09	-0.24379	0.22461	0.277748	Yes	Not assessed
6:32901268:T:C	rs241402	C4A.C4B.4481.34.2	COVID_A1	24	0.539683	0.206494	0.00896079	0.519129	-0.1422	0.0253	1.90347e-08	-0.24722	0.16279	0.128852	Yes	Not assessed
6:32975254:TTAAG:T	rs34388614	C4A.C4B.4481.34.2	COVID_A1	24	0.539683	0.206494	0.00896079	0.519129	-0.1508	0.0241	3.91796e-10	-0.25779	0.19064	0.1763	Yes	Not assessed
17:1728145:G:C	rs62090046	SERPINF1.7735.17.3	COVID_A1	7	0.729437	0.330076	0.0271116	0.535002	-0.4715	0.1031	4.80263e-06	0.89884	0.62931	0.153207	Yes	Not assessed
17:1733780:A:G	rs3809871	SERPINF1.7735.17.3	COVID_A1	7	0.729437	0.330076	0.0271116	0.535002	0.1234	0.0247	5.85464e-07	0.10941	0.16417	0.505128	Yes	Not assessed
17:1762959:C:T	rs62088172	SERPINF1.7735.17.3	COVID_A1	7	0.729437	0.330076	0.0271116	0.535002	-0.4284	0.0252	8.21199e-65	-0.30492	0.1532	0.0465536	Yes	Not assessed
17:1773615:C:T	rs1894286	SERPINF1.7735.17.3	COVID_A1	7	0.729437	0.330076	0.0271116	0.535002	0.3822	0.0703	5.42765e-08	0.53735	0.33441	0.108085	Yes	Not assessed
17:1793767:C:G	rs76253868	SERPINF1.7735.17.3	COVID_A1	7	0.729437	0.330076	0.0271116	0.535002	0.2633	0.0423	4.82828e-10	0.49189	0.28611	0.0855718	Yes	Not assessed
17:1809210:C:T	rs72822473	SERPINF1.7735.17.3	COVID_A1	7	0.729437	0.330076	0.0271116	0.535002	0.3133	0.0599	1.69158e-07	-0.33006	0.53822	0.539715	Yes	Not assessed
17:1900718:C:G	rs34120859	SERPINF1.7735.17.3	COVID_A1	7	0.729437	0.330076	0.0271116	0.535002	0.1512	0.0303	6.03484e-07	0.06564	0.17394	0.705898	Yes	Not assessed
1:179589189:G:A	rs368115293	QSOX1.6217.23.3	COVID_B2	8	0.100907	0.0427604	0.0182835	0.55399	0.5299	0.1063	6.19784e-07	-0.034296	0.11732	0.770035	Yes	Not assessed
1:180074404:G:A	rs1981314	QSOX1.6217.23.3	COVID_B2	8	0.100907	0.0427604	0.0182835	0.55399	-0.1481	0.0318	3.20488e-06	-0.035384	0.024791	0.153496	Yes	Not assessed
1:180130177:G:A	rs34342132	QSOX1.6217.23.3	COVID_B2	8	0.100907	0.0427604	0.0182835	0.55399	-0.2409	0.0469	2.79961e-07	-0.018113	0.05457	0.739948	Yes	Not assessed
1:180148779:A:G	rs12745791	QSOX1.6217.23.3	COVID_B2	8	0.100907	0.0427604	0.0182835	0.55399	-0.2717	0.0297	5.79178e-20	-0.0017996	0.024304	0.940974	Yes	Not assessed
1:180152649:C:T	rs79468905	QSOX1.6217.23.3	COVID_B2	8	0.100907	0.0427604	0.0182835	0.55399	0.3035	0.0578	1.51387e-07	0.089097	0.055016	0.105345	Yes	Not assessed
1:180167576:T:C	rs3753809	QSOX1.6217.23.3	COVID_B2	8	0.100907	0.0427604	0.0182835	0.55399	-0.3287	0.0616	9.4999e-08	-0.086131	0.053003	0.104158	Yes	Not assessed
1:180191099:C:T	rs12091590	QSOX1.6217.23.3	COVID_B2	8	0.100907	0.0427604	0.0182835	0.55399	-0.7395	0.1434	2.51067e-07	-0.044307	0.099724	0.656828	Yes	Not assessed
1:180194255:A:G	rs12371	QSOX1.6217.23.3	COVID_B2	8	0.100907	0.0427604	0.0182835	0.55399	0.6995	0.0426	1.37142e-60	0.070346	0.038118	0.0649678	Yes	Not assessed
12:27679129:T:G	rs61917495	MANSC4.9578.263.3	COVID_B2	7	0.112823	0.0459261	0.0140251	0.55399	0.4115	0.0875	2.56546e-06	-0.072675	0.091823	0.428671	Yes	Not assessed
12:27752757:A:G	rs10771361	MANSC4.9578.263.3	COVID_B2	7	0.112823	0.0459261	0.0140251	0.55399	-0.2326	0.0243	1.04841e-21	-0.016533	0.021899	0.450269	Yes	Not assessed
12:27759464:C:T	rs150053510	MANSC4.9578.263.3	COVID_B2	7	0.112823	0.0459261	0.0140251	0.55399	0.6227	0.1118	2.5508e-08	0.14456	0.11157	0.195083	Yes	Not assessed
12:27774948:T:C	rs36138811	MANSC4.9578.263.3	COVID_B2	7	0.112823	0.0459261	0.0140251	0.55399	0.6369	0.0277	5.50491e-117	0.068184	0.030472	0.0252475	Yes	Not assessed
12:27806128:G:A	rs73088203	MANSC4.9578.263.3	COVID_B2	7	0.112823	0.0459261	0.0140251	0.55399	-0.24	0.0347	4.63179e-12	-0.1201	0.03638	0.000962501	Yes	Not assessed
12:27817179:T:C	rs10843000	MANSC4.9578.263.3	COVID_B2	7	0.112823	0.0459261	0.0140251	0.55399	0.1882	0.0307	8.77173e-10	0.001354	0.03215	0.966407	Yes	Not assessed
12:27821931:T:C	rs111440247	MANSC4.9578.263.3	COVID_B2	7	0.112823	0.0459261	0.0140251	0.55399	0.5826	0.1202	1.25392e-06	0.25817	0.17277	0.135098	Yes	Not assessed
12:27679129:T:G	rs61917495	MANSC4.9578.263.3	COVID_C2	7	0.0533082	0.0459261	0.0140251	0.55399	0.4115	0.0875	2.56546e-06	0.023133	0.056499	0.682216	Yes	Not assessed
12:27752757:A:G	rs10771361	MANSC4.9578.263.3	COVID_C2	7	0.0533082	0.0459261	0.0140251	0.55399	-0.2326	0.0243	1.04841e-21	-0.015122	0.01358	0.265473	Yes	Not assessed
12:27759464:C:T	rs150053510	MANSC4.9578.263.3	COVID_C2	7	0.0533082	0.0459261	0.0140251	0.55399	0.6227	0.1118	2.5508e-08	-0.0096546	0.063729	0.879586	Yes	Not assessed
12:27774948:T:C	rs36138811	MANSC4.9578.263.3	COVID_C2	7	0.0533082	0.0459261	0.0140251	0.55399	0.6369	0.0277	5.50491e-117	0.029158	0.017199	0.0900126	Yes	Not assessed
12:27806128:G:A	rs73088203	MANSC4.9578.263.3	COVID_C2	7	0.0533082	0.0459261	0.0140251	0.55399	-0.24	0.0347	4.63179e-12	-0.05169	0.020066	0.00999509	Yes	Not assessed
12:27817179:T:C	rs10843000	MANSC4.9578.263.3	COVID_C2	7	0.0533082	0.0459261	0.0140251	0.55399	0.1882	0.0307	8.77173e-10	0.023751	0.018577	0.201067	Yes	Not assessed
12:27821931:T:C	rs111440247	MANSC4.9578.263.3	COVID_C2	7	0.0533082	0.0459261	0.0140251	0.55399	0.5826	0.1202	1.25392e-06	0.13512	0.085359	0.11343	Yes	Not assessed
3:54105071:A:G	rs12374095	CACNA2D3.8885.6.3	COVID_A1	6	-0.945837	0.441993	0.03236	0.558732	0.1935	0.0315	8.10502e-10	0.096929	0.18123	0.592761	Yes	Not assessed
3:54119490:G:A	rs34084772	CACNA2D3.8885.6.3	COVID_A1	6	-0.945837	0.441993	0.03236	0.558732	-0.2329	0.0323	5.5736e-13	0.34238	0.20134	0.0890357	Yes	Not assessed
3:54123689:A:G	rs114218694	CACNA2D3.8885.6.3	COVID_A1	6	-0.945837	0.441993	0.03236	0.558732	0.8608	0.1312	5.34569e-11	-0.16116	0.60737	0.790747	Yes	Not assessed
3:54566416:G:C	rs2030395	CACNA2D3.8885.6.3	COVID_A1	6	-0.945837	0.441993	0.03236	0.558732	-0.1198	0.0252	1.99462e-06	0.23452	0.14502	0.105845	Yes	Not assessed
3:54879582:G:C	rs78258914	CACNA2D3.8885.6.3	COVID_A1	6	-0.945837	0.441993	0.03236	0.558732	0.2345	0.051	4.26486e-06	-0.31757	0.29815	0.286815	Yes	Not assessed
3:55055459:A:G	rs77985438	CACNA2D3.8885.6.3	COVID_A1	6	-0.945837	0.441993	0.03236	0.558732	0.294	0.0557	1.30405e-07	-0.63921	0.34145	0.0612003	Yes	Not assessed
22:16993290:G:A	rs112401805	IL17RA.2992.59.2	COVID_A1	17	-0.331544	0.158604	0.0365826	0.558732	-0.461	0.101	5.01029e-06	0.072523	0.66302	0.912899	Yes	Not assessed
22:17018004:C:T	rs534023765	IL17RA.2992.59.2	COVID_A1	17	-0.331544	0.158604	0.0365826	0.558732	0.3754	0.0717	1.64357e-07	-0.40903	0.55718	0.462883	Yes	Not assessed
22:17099923:T:C	rs9606615	IL17RA.2992.59.2	COVID_A1	17	-0.331544	0.158604	0.0365826	0.558732	-0.1267	0.0255	6.74285e-07	-0.17784	0.17437	0.307776	Yes	Not assessed
22:17105741:G:A	rs4819959	IL17RA.2992.59.2	COVID_A1	17	-0.331544	0.158604	0.0365826	0.558732	0.9127	0.0195	0	-0.3065	0.16018	0.0556876	Yes	Not assessed
22:17117065:C:T	rs9605219	IL17RA.2992.59.2	COVID_A1	17	-0.331544	0.158604	0.0365826	0.558732	-0.6751	0.0535	1.66566e-36	0.46615	0.31417	0.137875	Yes	Not assessed
22:17126595:T:C	rs77579439	IL17RA.2992.59.2	COVID_A1	17	-0.331544	0.158604	0.0365826	0.558732	0.8164	0.131	4.60338e-10	0.76487	0.97417	0.432365	Yes	Not assessed
22:17128692:A:G	rs80318002	IL17RA.2992.59.2	COVID_A1	17	-0.331544	0.158604	0.0365826	0.558732	-0.8841	0.1114	2.08359e-15	0.11191	1.0104	0.911808	Yes	Not assessed
22:17139058:C:T	rs140756712	IL17RA.2992.59.2	COVID_A1	17	-0.331544	0.158604	0.0365826	0.558732	0.9132	0.1051	3.6607e-18	-0.46859	0.5398	0.38535	Yes	Not assessed
22:17142947:A:G	rs5747009	IL17RA.2992.59.2	COVID_A1	17	-0.331544	0.158604	0.0365826	0.558732	0.5573	0.0261	3.69703e-101	-0.10146	0.1666	0.542522	Yes	Not assessed
22:17151243:C:T	rs73149858	IL17RA.2992.59.2	COVID_A1	17	-0.331544	0.158604	0.0365826	0.558732	-0.5339	0.0602	7.39577e-19	0.81427	0.34766	0.0191733	Yes	Not assessed
22:17157426:T:C	rs113824702	IL17RA.2992.59.2	COVID_A1	17	-0.331544	0.158604	0.0365826	0.558732	0.733	0.1385	1.20709e-07	-1.2802	0.83392	0.124745	Yes	Not assessed
22:17159155:G:A	rs7287672	IL17RA.2992.59.2	COVID_A1	17	-0.331544	0.158604	0.0365826	0.558732	0.1631	0.0269	1.33442e-09	-0.26314	0.16663	0.114293	Yes	Not assessed
22:17160290:A:C	rs145618343	IL17RA.2992.59.2	COVID_A1	17	-0.331544	0.158604	0.0365826	0.558732	-0.7721	0.081	1.54135e-21	-0.39585	0.8476	0.640482	Yes	Not assessed
22:17193227:C:T	rs4819973	IL17RA.2992.59.2	COVID_A1	17	-0.331544	0.158604	0.0365826	0.558732	0.1955	0.0278	2.03048e-12	-0.12452	0.17213	0.46943	Yes	Not assessed
22:17204928:T:G	rs11704386	IL17RA.2992.59.2	COVID_A1	17	-0.331544	0.158604	0.0365826	0.558732	0.1973	0.0258	2.05264e-14	-0.20197	0.1504	0.179309	Yes	Not assessed
22:17215567:T:C	rs9617973	IL17RA.2992.59.2	COVID_A1	17	-0.331544	0.158604	0.0365826	0.558732	0.5467	0.1081	4.25113e-07	0.62371	1.0128	0.538008	Yes	Not assessed
22:17216052:T:C	rs5748950	IL17RA.2992.59.2	COVID_A1	17	-0.331544	0.158604	0.0365826	0.558732	-0.1653	0.0285	6.63149e-09	0.16912	0.17243	0.32669	Yes	Not assessed
6:31755003:C:T	rs3130486	HLA.DQA2.7757.5.3	COVID_A1	16	0.535258	0.256219	0.036702	0.558732	-0.165	0.0278	2.93395e-09	0.15778	0.15686	0.31448	Yes	Not assessed
6:31770041:C:G	rs115526889	HLA.DQA2.7757.5.3	COVID_A1	16	0.535258	0.256219	0.036702	0.558732	0.4182	0.0819	3.28655e-07	-0.67395	0.58131	0.246308	Yes	Not assessed
6:32238910:A:T	rs511027	HLA.DQA2.7757.5.3	COVID_A1	16	0.535258	0.256219	0.036702	0.558732	0.1822	0.0384	2.08721e-06	0.19336	0.2359	0.412405	Yes	Not assessed
6:32427115:A:G	rs114852064	HLA.DQA2.7757.5.3	COVID_A1	16	0.535258	0.256219	0.036702	0.558732	0.5354	0.1055	3.87738e-07	-0.022513	0.77199	0.976735	Yes	Not assessed
6:32448666:G:T	rs9268690	HLA.DQA2.7757.5.3	COVID_A1	16	0.535258	0.256219	0.036702	0.558732	-0.4786	0.0954	5.2547e-07	-0.58077	0.6252	0.352923	Yes	Not assessed
6:32592757:A:T	rs11756836	HLA.DQA2.7757.5.3	COVID_A1	16	0.535258	0.256219	0.036702	0.558732	0.3157	0.0486	8.25468e-11	0.4686	0.3296	0.155107	Yes	Not assessed
6:32616142:T:C	rs33964890	HLA.DQA2.7757.5.3	COVID_A1	16	0.535258	0.256219	0.036702	0.558732	0.2165	0.0271	1.36115e-15	-0.18973	0.18261	0.298809	Yes	Not assessed
6:32622382:C:A	rs9271547	HLA.DQA2.7757.5.3	COVID_A1	16	0.535258	0.256219	0.036702	0.558732	0.4488	0.0237	5.6841e-80	0.54606	0.17903	0.00228763	Yes	Not assessed
6:32624057:G:T	rs34106969	HLA.DQA2.7757.5.3	COVID_A1	16	0.535258	0.256219	0.036702	0.558732	0.2717	0.0333	3.37365e-16	0.43483	0.19746	0.0276571	Yes	Not assessed
6:32644337:A:G	rs9273060	HLA.DQA2.7757.5.3	COVID_A1	16	0.535258	0.256219	0.036702	0.558732	-0.4752	0.0275	6.6548e-67	-0.30247	0.19494	0.120757	Yes	Not assessed
6:32674706:A:C	rs1794484	HLA.DQA2.7757.5.3	COVID_A1	16	0.535258	0.256219	0.036702	0.558732	0.3093	0.0485	1.80214e-10	-0.556	0.32203	0.084249	Yes	Not assessed
6:32714451:G:A	rs2894381	HLA.DQA2.7757.5.3	COVID_A1	16	0.535258	0.256219	0.036702	0.558732	-0.2652	0.0302	1.61371e-18	-0.062923	0.17396	0.717569	Yes	Not assessed
6:32782483:T:A	rs113936637	HLA.DQA2.7757.5.3	COVID_A1	16	0.535258	0.256219	0.036702	0.558732	0.3257	0.0515	2.54429e-10	0.52052	0.27764	0.06082	Yes	Not assessed
6:33000710:G:A	rs28496707	HLA.DQA2.7757.5.3	COVID_A1	16	0.535258	0.256219	0.036702	0.558732	-0.1728	0.0385	7.17898e-06	-0.50285	0.2443	0.0395585	Yes	Not assessed
6:33003931:G:A	rs3128931	HLA.DQA2.7757.5.3	COVID_A1	16	0.535258	0.256219	0.036702	0.558732	0.1324	0.0283	2.89058e-06	0.23651	0.18395	0.198537	Yes	Not assessed
6:33054998:C:T	rs3097665	HLA.DQA2.7757.5.3	COVID_A1	16	0.535258	0.256219	0.036702	0.558732	0.1639	0.0299	4.21484e-08	0.28107	0.23185	0.2254	Yes	Not assessed
9:134855857:G:T	rs59586663	FCN1.3613.62.5	COVID_A1	8	0.465384	0.229381	0.0424716	0.571436	-0.6096	0.0957	1.89144e-10	0.22417	0.57754	0.697908	Yes	Not assessed
9:134881503:C:T	rs72776336	FCN1.3613.62.5	COVID_A1	8	0.465384	0.229381	0.0424716	0.571436	0.5245	0.1157	5.80759e-06	-0.27376	0.75046	0.715268	Yes	Not assessed
9:134905553:G:A	rs11103571	FCN1.3613.62.5	COVID_A1	8	0.465384	0.229381	0.0424716	0.571436	0.2641	0.0288	4.7241e-20	0.14729	0.17164	0.390819	Yes	Not assessed
9:134962817:C:T	rs62571473	FCN1.3613.62.5	COVID_A1	8	0.465384	0.229381	0.0424716	0.571436	-0.3269	0.0391	6.23928e-17	0.066066	0.24086	0.78386	Yes	Not assessed
9:134963026:G:A	rs11103602	FCN1.3613.62.5	COVID_A1	8	0.465384	0.229381	0.0424716	0.571436	0.5827	0.0266	2.27652e-106	0.30751	0.15703	0.0501962	Yes	Not assessed
9:134966583:C:T	rs75575054	FCN1.3613.62.5	COVID_A1	8	0.465384	0.229381	0.0424716	0.571436	-0.5717	0.1241	4.08974e-06	-0.19816	0.69325	0.774999	Yes	Not assessed
9:134967719:G:A	rs56171858	FCN1.3613.62.5	COVID_A1	8	0.465384	0.229381	0.0424716	0.571436	-0.2863	0.0594	1.43655e-06	-0.28861	0.32531	0.37498	Yes	Not assessed
9:134983690:G:C	rs11103612	FCN1.3613.62.5	COVID_A1	8	0.465384	0.229381	0.0424716	0.571436	-0.1398	0.0249	1.9718e-08	0.11754	0.15541	0.449456	Yes	Not assessed
11:117929586:A:G	rs11604677	AMICA1.8232.90.3	COVID_A2	36	-0.0748281	0.0354593	0.0348368	0.577448	-0.1419	0.0245	6.96208e-09	0.041553	0.038537	0.280917	Yes	Not assessed
11:118013226:C:G	rs11216678	AMICA1.8232.90.3	COVID_A2	36	-0.0748281	0.0354593	0.0348368	0.577448	0.317	0.0476	2.74455e-11	-0.089834	0.058792	0.126513	Yes	Not assessed
11:118083366:A:G	rs657118	AMICA1.8232.90.3	COVID_A2	36	-0.0748281	0.0354593	0.0348368	0.577448	-0.1411	0.025	1.66144e-08	0.0011614	0.037398	0.975226	Yes	Not assessed
11:118146823:T:C	rs117181393	AMICA1.8232.90.3	COVID_A2	36	-0.0748281	0.0354593	0.0348368	0.577448	-0.3765	0.0654	8.56824e-09	0.18139	0.082418	0.0277463	Yes	Not assessed
11:118155254:C:T	rs645451	AMICA1.8232.90.3	COVID_A2	36	-0.0748281	0.0354593	0.0348368	0.577448	-0.2568	0.0514	5.84986e-07	-0.0347	0.068411	0.611995	Yes	Not assessed
11:118156691:A:C	rs117493218	AMICA1.8232.90.3	COVID_A2	36	-0.0748281	0.0354593	0.0348368	0.577448	-0.418	0.0608	6.19899e-12	0.097607	0.081041	0.228429	Yes	Not assessed
11:118157379:C:T	rs876479	AMICA1.8232.90.3	COVID_A2	36	-0.0748281	0.0354593	0.0348368	0.577448	0.2342	0.0256	5.77629e-20	-0.088805	0.038504	0.0210892	Yes	Not assessed
11:118161508:C:T	rs116979688	AMICA1.8232.90.3	COVID_A2	36	-0.0748281	0.0354593	0.0348368	0.577448	0.3858	0.0785	8.89414e-07	-0.24134	0.13144	0.0663395	Yes	Not assessed
11:118170218:T:C	rs144511511	AMICA1.8232.90.3	COVID_A2	36	-0.0748281	0.0354593	0.0348368	0.577448	0.4619	0.0838	3.54914e-08	0.064805	0.15536	0.676585	Yes	Not assessed
11:118183048:G:A	rs12801779	AMICA1.8232.90.3	COVID_A2	36	-0.0748281	0.0354593	0.0348368	0.577448	-0.8224	0.0988	8.5125e-17	-0.022035	0.18033	0.902746	Yes	Not assessed
11:118192634:A:G	rs113521822	AMICA1.8232.90.3	COVID_A2	36	-0.0748281	0.0354593	0.0348368	0.577448	-0.4866	0.0597	3.61663e-16	0.0043171	0.064469	0.94661	Yes	Not assessed
11:118193315:G:T	rs45555132	AMICA1.8232.90.3	COVID_A2	36	-0.0748281	0.0354593	0.0348368	0.577448	-0.6533	0.0978	2.39009e-11	0.14503	0.11941	0.224536	Yes	Not assessed
11:118206239:C:G	rs11600544	AMICA1.8232.90.3	COVID_A2	36	-0.0748281	0.0354593	0.0348368	0.577448	0.9964	0.018	0	-0.071285	0.037514	0.0574037	Yes	Not assessed
11:118209234:G:A	rs188755908	AMICA1.8232.90.3	COVID_A2	36	-0.0748281	0.0354593	0.0348368	0.577448	-0.6241	0.137	5.22675e-06	0.32898	0.21134	0.119556	Yes	Not assessed
11:118220543:C:G	rs77280285	AMICA1.8232.90.3	COVID_A2	36	-0.0748281	0.0354593	0.0348368	0.577448	0.6648	0.0837	1.97903e-15	-0.20827	0.08456	0.0137786	Yes	Not assessed
11:118244616:C:T	rs75458655	AMICA1.8232.90.3	COVID_A2	36	-0.0748281	0.0354593	0.0348368	0.577448	0.4746	0.0821	7.4366e-09	0.18022	0.12196	0.139489	Yes	Not assessed
11:118251488:T:G	rs117864380	AMICA1.8232.90.3	COVID_A2	36	-0.0748281	0.0354593	0.0348368	0.577448	-0.5958	0.1143	1.86214e-07	-0.20127	0.16677	0.227482	Yes	Not assessed
11:118263192:TTAAAG:T	rs1157490573	AMICA1.8232.90.3	COVID_A2	36	-0.0748281	0.0354593	0.0348368	0.577448	-0.5089	0.0937	5.59879e-08	-0.21547	0.15395	0.16163	Yes	Not assessed
11:118263321:T:C	rs189554439	AMICA1.8232.90.3	COVID_A2	36	-0.0748281	0.0354593	0.0348368	0.577448	-0.5438	0.1155	2.49883e-06	-0.030312	0.18017	0.866394	Yes	Not assessed
11:118275068:CT:C	rs146289219	AMICA1.8232.90.3	COVID_A2	36	-0.0748281	0.0354593	0.0348368	0.577448	-0.6858	0.0773	7.18905e-19	-0.15179	0.13721	0.268614	Yes	Not assessed
11:118277556:C:T	rs2187557	AMICA1.8232.90.3	COVID_A2	36	-0.0748281	0.0354593	0.0348368	0.577448	-0.315	0.0281	3.6434e-29	-0.018305	0.039484	0.64293	Yes	Not assessed
11:118295882:A:G	rs73026643	AMICA1.8232.90.3	COVID_A2	36	-0.0748281	0.0354593	0.0348368	0.577448	0.4854	0.0749	9.13338e-11	0.053233	0.086194	0.536842	Yes	Not assessed
11:118306637:G:T	rs146411033	AMICA1.8232.90.3	COVID_A2	36	-0.0748281	0.0354593	0.0348368	0.577448	-0.9143	0.1832	6.01545e-07	0.36753	0.35913	0.306124	No	Not a missense variant or in LD with missense variants
11:118316501:A:G	rs73014296	AMICA1.8232.90.3	COVID_A2	36	-0.0748281	0.0354593	0.0348368	0.577448	0.381	0.0622	9.0455e-10	0.094964	0.074532	0.202615	Yes	Not assessed
11:118335978:G:C	rs149673438	AMICA1.8232.90.3	COVID_A2	36	-0.0748281	0.0354593	0.0348368	0.577448	0.4476	0.071	2.89639e-10	0.060361	0.094022	0.520881	Yes	Not assessed
11:118348793:C:T	rs140572326	AMICA1.8232.90.3	COVID_A2	36	-0.0748281	0.0354593	0.0348368	0.577448	-0.7436	0.1586	2.75182e-06	0.089778	0.25743	0.727279	Yes	Not assessed
11:118361311:C:T	rs77806521	AMICA1.8232.90.3	COVID_A2	36	-0.0748281	0.0354593	0.0348368	0.577448	-0.6364	0.078	3.37881e-16	-0.13159	0.09325	0.1582	Yes	Not assessed
11:118398959:A:G	rs45529532	AMICA1.8232.90.3	COVID_A2	36	-0.0748281	0.0354593	0.0348368	0.577448	-0.5483	0.0973	1.74907e-08	-0.0012421	0.096124	0.98969	Yes	Not assessed
11:118402248:A:G	rs12420093	AMICA1.8232.90.3	COVID_A2	36	-0.0748281	0.0354593	0.0348368	0.577448	0.4124	0.0633	7.26858e-11	-0.069958	0.10965	0.523466	Yes	Not assessed
11:118403526:T:G	rs148247831	AMICA1.8232.90.3	COVID_A2	36	-0.0748281	0.0354593	0.0348368	0.577448	-0.4759	0.0758	3.42154e-10	0.24079	0.12862	0.0611922	Yes	Not assessed
11:118483791:G:C	rs9332795	AMICA1.8232.90.3	COVID_A2	36	-0.0748281	0.0354593	0.0348368	0.577448	0.5636	0.0898	3.47016e-10	-0.040274	0.15537	0.795471	Yes	Not assessed
11:118520660:A:G	rs576950	AMICA1.8232.90.3	COVID_A2	36	-0.0748281	0.0354593	0.0348368	0.577448	-0.2563	0.0268	1.13914e-21	0.005347	0.0388	0.890391	Yes	Not assessed
11:118532247:G:T	rs45558732	AMICA1.8232.90.3	COVID_A2	36	-0.0748281	0.0354593	0.0348368	0.577448	0.3949	0.0685	8.16755e-09	-0.035186	0.12023	0.769785	Yes	Not assessed
11:118653094:T:C	rs72999483	AMICA1.8232.90.3	COVID_A2	36	-0.0748281	0.0354593	0.0348368	0.577448	0.2905	0.0415	2.55963e-12	0.040334	0.060341	0.503856	Yes	Not assessed
11:118713138:C:T	rs12803363	AMICA1.8232.90.3	COVID_A2	36	-0.0748281	0.0354593	0.0348368	0.577448	-0.313	0.06	1.82172e-07	0.16042	0.092572	0.0831096	Yes	Not assessed
11:118865528:C:CG	rs60431460	AMICA1.8232.90.3	COVID_A2	36	-0.0748281	0.0354593	0.0348368	0.577448	-0.1558	0.0244	1.71122e-10	-0.035117	0.037084	0.34366	Yes	Not assessed
1:153875146:G:A	rs111795967	IL6R.8092.29.3	COVID_A2	39	-0.0522845	0.0249301	0.0359722	0.577448	0.4444	0.0756	4.14484e-09	0.10439	0.084257	0.215365	Yes	Not assessed
1:153891132:T:C	rs137949898	IL6R.8092.29.3	COVID_A2	39	-0.0522845	0.0249301	0.0359722	0.577448	0.3969	0.0889	8.02309e-06	-0.18452	0.1229	0.133256	Yes	Not assessed
1:154182111:T:C	rs61806853	IL6R.8092.29.3	COVID_A2	39	-0.0522845	0.0249301	0.0359722	0.577448	0.4936	0.0573	7.03637e-18	0.065648	0.064412	0.308113	Yes	Not assessed
1:154291980:C:A	rs11810847	IL6R.8092.29.3	COVID_A2	39	-0.0522845	0.0249301	0.0359722	0.577448	-0.1876	0.04	2.73205e-06	0.034735	0.045922	0.449415	Yes	Not assessed
1:154370041:C:T	rs79438587	IL6R.8092.29.3	COVID_A2	39	-0.0522845	0.0249301	0.0359722	0.577448	0.3917	0.0338	4.699e-31	0.074038	0.050121	0.139626	Yes	Not assessed
1:154395747:G:A	rs147763778	IL6R.8092.29.3	COVID_A2	39	-0.0522845	0.0249301	0.0359722	0.577448	0.4384	0.0596	1.89922e-13	-0.13932	0.090923	0.125452	Yes	Not assessed
1:154420375:G:A	rs146389272	IL6R.8092.29.3	COVID_A2	39	-0.0522845	0.0249301	0.0359722	0.577448	0.4935	0.0697	1.43797e-12	-0.0098092	0.10362	0.924581	Yes	Not assessed
1:154421941:T:A	rs4601580	IL6R.8092.29.3	COVID_A2	39	-0.0522845	0.0249301	0.0359722	0.577448	0.3413	0.0259	1.18078e-39	0.089461	0.039153	0.0223182	Yes	Not assessed
1:154430995:G:A	rs143318546	IL6R.8092.29.3	COVID_A2	39	-0.0522845	0.0249301	0.0359722	0.577448	-0.8036	0.1437	2.24203e-08	0.42623	0.24857	0.0863951	No	Not a missense variant or in LD with missense variants
1:154431149:G:A	rs540848324	IL6R.8092.29.3	COVID_A2	39	-0.0522845	0.0249301	0.0359722	0.577448	0.7295	0.1447	4.61981e-07	0.24138	0.26155	0.356068	Yes	Not assessed
1:154431978:C:T	rs116037345	IL6R.8092.29.3	COVID_A2	39	-0.0522845	0.0249301	0.0359722	0.577448	-0.6086	0.0713	1.39232e-17	-0.060944	0.076283	0.424337	Yes	Not assessed
1:154436958:A:G	rs79778789	IL6R.8092.29.3	COVID_A2	39	-0.0522845	0.0249301	0.0359722	0.577448	0.849	0.0884	7.68467e-22	-0.15535	0.13002	0.232159	Yes	Not assessed
1:154439292:G:A	rs76093405	IL6R.8092.29.3	COVID_A2	39	-0.0522845	0.0249301	0.0359722	0.577448	-0.6381	0.0777	2.16892e-16	-0.18288	0.099173	0.0651758	Yes	Not assessed
1:154443199:G:T	rs79219014	IL6R.8092.29.3	COVID_A2	39	-0.0522845	0.0249301	0.0359722	0.577448	0.7069	0.0768	3.43499e-20	-0.012005	0.089568	0.893377	Yes	Not assessed
1:154443202:A:G	rs558681060	IL6R.8092.29.3	COVID_A2	39	-0.0522845	0.0249301	0.0359722	0.577448	0.9886	0.1634	1.44681e-09	0.60372	0.34688	0.0817837	No	Not a missense variant or in LD with missense variants
1:154443593:G:A	rs116141616	IL6R.8092.29.3	COVID_A2	39	-0.0522845	0.0249301	0.0359722	0.577448	-0.4697	0.0721	7.29015e-11	0.04697	0.082635	0.569761	Yes	Not assessed
1:154444329:C:T	rs139952834	IL6R.8092.29.3	COVID_A2	39	-0.0522845	0.0249301	0.0359722	0.577448	-0.6409	0.1072	2.2514e-09	-0.11504	0.16943	0.497149	Yes	Not assessed
1:154447857:G:A	rs113580743	IL6R.8092.29.3	COVID_A2	39	-0.0522845	0.0249301	0.0359722	0.577448	-0.525	0.0605	4.03903e-18	0.092923	0.10189	0.361772	Yes	Not assessed
1:154453714:G:A	rs12739228	IL6R.8092.29.3	COVID_A2	39	-0.0522845	0.0249301	0.0359722	0.577448	-0.6425	0.0648	3.57814e-23	-0.083646	0.077903	0.282948	Yes	Not assessed
1:154453788:C:T	rs4129267	IL6R.8092.29.3	COVID_A2	39	-0.0522845	0.0249301	0.0359722	0.577448	1.1023	0.0159	0	-0.059534	0.028448	0.0363732	Yes	Not assessed
1:154466204:G:A	rs35013949	IL6R.8092.29.3	COVID_A2	39	-0.0522845	0.0249301	0.0359722	0.577448	0.6456	0.1285	5.05734e-07	-0.037024	0.19333	0.848129	Yes	Not assessed
1:154467408:CTT:C	rs143915141	IL6R.8092.29.3	COVID_A2	39	-0.0522845	0.0249301	0.0359722	0.577448	-0.5791	0.1218	1.98923e-06	0.24775	0.12613	0.0495019	Yes	Not assessed
1:154470538:C:T	rs79925547	IL6R.8092.29.3	COVID_A2	39	-0.0522845	0.0249301	0.0359722	0.577448	0.779	0.1154	1.47404e-11	-0.059411	0.16724	0.722407	Yes	Not assessed
1:154497349:T:C	rs140615642	IL6R.8092.29.3	COVID_A2	39	-0.0522845	0.0249301	0.0359722	0.577448	0.5638	0.0836	1.54064e-11	-0.084224	0.17037	0.621052	Yes	Not assessed
1:154511179:A:G	rs116059394	IL6R.8092.29.3	COVID_A2	39	-0.0522845	0.0249301	0.0359722	0.577448	-0.5916	0.056	4.36277e-26	0.035327	0.088594	0.690076	Yes	Not assessed
1:154525677:T:C	rs75631461	IL6R.8092.29.3	COVID_A2	39	-0.0522845	0.0249301	0.0359722	0.577448	0.6022	0.0958	3.25724e-10	-0.054679	0.12687	0.66648	Yes	Not assessed
1:154529836:C:T	rs116710125	IL6R.8092.29.3	COVID_A2	39	-0.0522845	0.0249301	0.0359722	0.577448	-0.5956	0.0558	1.34939e-26	-0.076333	0.099838	0.444528	Yes	Not assessed
1:154536585:G:A	rs147830103	IL6R.8092.29.3	COVID_A2	39	-0.0522845	0.0249301	0.0359722	0.577448	-0.6744	0.084	9.86142e-16	-0.0032133	0.093788	0.972669	Yes	Not assessed
1:154543928:C:T	rs76289529	IL6R.8092.29.3	COVID_A2	39	-0.0522845	0.0249301	0.0359722	0.577448	0.6686	0.0678	6.12164e-23	0.068353	0.096908	0.480599	Yes	Not assessed
1:154558912:G:A	rs145464582	IL6R.8092.29.3	COVID_A2	39	-0.0522845	0.0249301	0.0359722	0.577448	0.6622	0.1007	4.83376e-11	0.18489	0.19561	0.344558	Yes	Not assessed
1:154562004:C:T	rs149551556	IL6R.8092.29.3	COVID_A2	39	-0.0522845	0.0249301	0.0359722	0.577448	-0.5627	0.0949	3.04045e-09	0.13209	0.11986	0.270446	Yes	Not assessed
1:154569241:G:A	rs138398618	IL6R.8092.29.3	COVID_A2	39	-0.0522845	0.0249301	0.0359722	0.577448	-0.4872	0.1028	2.14458e-06	-0.072157	0.14551	0.619972	Yes	Not assessed
1:154577015:G:C	rs12125018	IL6R.8092.29.3	COVID_A2	39	-0.0522845	0.0249301	0.0359722	0.577448	0.5227	0.1062	8.57319e-07	0.12661	0.17038	0.457419	Yes	Not assessed
1:154607518:G:A	rs145558655	IL6R.8092.29.3	COVID_A2	39	-0.0522845	0.0249301	0.0359722	0.577448	0.6572	0.1161	1.50812e-08	0.27111	0.1989	0.172868	Yes	Not assessed
1:154659152:ACTGCG:A	rs201012281	IL6R.8092.29.3	COVID_A2	39	-0.0522845	0.0249301	0.0359722	0.577448	0.7369	0.0885	8.32298e-17	-0.0020308	0.15687	0.989671	Yes	Not assessed
1:154678568:C:G	rs6426877	IL6R.8092.29.3	COVID_A2	39	-0.0522845	0.0249301	0.0359722	0.577448	-0.2553	0.0248	7.47188e-25	0.008277	0.038203	0.828475	Yes	Not assessed
1:154716012:T:C	rs58892549	IL6R.8092.29.3	COVID_A2	39	-0.0522845	0.0249301	0.0359722	0.577448	0.4402	0.0536	2.16294e-16	-0.090324	0.060209	0.133569	Yes	Not assessed
1:154725148:C:G	rs141444337	IL6R.8092.29.3	COVID_A2	39	-0.0522845	0.0249301	0.0359722	0.577448	-0.4572	0.0637	7.10527e-13	-0.11733	0.10276	0.253543	Yes	Not assessed
1:154734827:G:A	rs72700223	IL6R.8092.29.3	COVID_A2	39	-0.0522845	0.0249301	0.0359722	0.577448	-0.2645	0.052	3.64658e-07	-0.11483	0.073133	0.11638	Yes	Not assessed
11:117929586:A:G	rs11604677	AMICA1.8232.90.3	COVID_B1	36	-0.0826122	0.0354593	0.0348368	0.577448	-0.1419	0.0245	6.96208e-09	0.013209	0.040149	0.742156	Yes	Not assessed
11:118013226:C:G	rs11216678	AMICA1.8232.90.3	COVID_B1	36	-0.0826122	0.0354593	0.0348368	0.577448	0.317	0.0476	2.74455e-11	0.023123	0.093627	0.804932	Yes	Not assessed
11:118083366:A:G	rs657118	AMICA1.8232.90.3	COVID_B1	36	-0.0826122	0.0354593	0.0348368	0.577448	-0.1411	0.025	1.66144e-08	-0.062733	0.03989	0.1158	Yes	Not assessed
11:118155254:C:T	rs645451	AMICA1.8232.90.3	COVID_B1	36	-0.0826122	0.0354593	0.0348368	0.577448	-0.2568	0.0514	5.84986e-07	-0.14927	0.091866	0.104191	Yes	Not assessed
11:118156691:A:C	rs117493218	AMICA1.8232.90.3	COVID_B1	36	-0.0826122	0.0354593	0.0348368	0.577448	-0.418	0.0608	6.19899e-12	0.18647	0.10837	0.0853091	Yes	Not assessed
11:118157379:C:T	rs876479	AMICA1.8232.90.3	COVID_B1	36	-0.0826122	0.0354593	0.0348368	0.577448	0.2342	0.0256	5.77629e-20	-0.064314	0.047723	0.17777	Yes	Not assessed
11:118161508:C:T	rs116979688	AMICA1.8232.90.3	COVID_B1	36	-0.0826122	0.0354593	0.0348368	0.577448	0.3858	0.0785	8.89414e-07	-0.23266	0.15699	0.138339	Yes	Not assessed
11:118170218:T:C	rs144511511	AMICA1.8232.90.3	COVID_B1	36	-0.0826122	0.0354593	0.0348368	0.577448	0.4619	0.0838	3.54914e-08	-0.61105	0.25879	0.0182168	Yes	Not assessed
11:118183048:G:A	rs12801779	AMICA1.8232.90.3	COVID_B1	36	-0.0826122	0.0354593	0.0348368	0.577448	-0.8224	0.0988	8.5125e-17	0.1348	0.25313	0.594357	Yes	Not assessed
11:118192634:A:G	rs113521822	AMICA1.8232.90.3	COVID_B1	36	-0.0826122	0.0354593	0.0348368	0.577448	-0.4866	0.0597	3.61663e-16	-0.018965	0.086234	0.82593	Yes	Not assessed
11:118193315:G:T	rs45555132	AMICA1.8232.90.3	COVID_B1	36	-0.0826122	0.0354593	0.0348368	0.577448	-0.6533	0.0978	2.39009e-11	0.35753	0.17185	0.0374818	Yes	Not assessed
11:118206239:C:G	rs11600544	AMICA1.8232.90.3	COVID_B1	36	-0.0826122	0.0354593	0.0348368	0.577448	0.9964	0.018	0	-0.075923	0.041119	0.064831	Yes	Not assessed
11:118209234:G:A	rs188755908	AMICA1.8232.90.3	COVID_B1	36	-0.0826122	0.0354593	0.0348368	0.577448	-0.6241	0.137	5.22675e-06	0.38024	0.29663	0.19989	Yes	Not assessed
11:118220543:C:G	rs77280285	AMICA1.8232.90.3	COVID_B1	36	-0.0826122	0.0354593	0.0348368	0.577448	0.6648	0.0837	1.97903e-15	0.048592	0.13244	0.713695	Yes	Not assessed
11:118244616:C:T	rs75458655	AMICA1.8232.90.3	COVID_B1	36	-0.0826122	0.0354593	0.0348368	0.577448	0.4746	0.0821	7.4366e-09	0.28388	0.18328	0.121409	Yes	Not assessed
11:118251488:T:G	rs117864380	AMICA1.8232.90.3	COVID_B1	36	-0.0826122	0.0354593	0.0348368	0.577448	-0.5958	0.1143	1.86214e-07	0.15202	0.24662	0.537621	Yes	Not assessed
11:118262596:T:A	rs74543584	AMICA1.8232.90.3	COVID_B1	36	-0.0826122	0.0354593	0.0348368	0.577448	-0.8273	0.1391	2.72236e-09	0.49717	0.41009	0.225381	No	not missense for AMICA1
11:118263192:TTAAAG:T	rs1157490573	AMICA1.8232.90.3	COVID_B1	36	-0.0826122	0.0354593	0.0348368	0.577448	-0.5089	0.0937	5.59879e-08	-0.39255	0.21014	0.0617564	Yes	Not assessed
11:118263321:T:C	rs189554439	AMICA1.8232.90.3	COVID_B1	36	-0.0826122	0.0354593	0.0348368	0.577448	-0.5438	0.1155	2.49883e-06	-0.30193	0.38021	0.427129	Yes	Not assessed
11:118264079:A:AGCCC	rs201577748	AMICA1.8232.90.3	COVID_B1	36	-0.0826122	0.0354593	0.0348368	0.577448	0.3929	0.0636	6.50533e-10	0.0085338	0.15001	0.954634	Yes	Not assessed
11:118275068:CT:C	rs146289219	AMICA1.8232.90.3	COVID_B1	36	-0.0826122	0.0354593	0.0348368	0.577448	-0.6858	0.0773	7.18905e-19	-0.13741	0.16192	0.396088	Yes	Not assessed
11:118277556:C:T	rs2187557	AMICA1.8232.90.3	COVID_B1	36	-0.0826122	0.0354593	0.0348368	0.577448	-0.315	0.0281	3.6434e-29	0.020107	0.042762	0.638207	Yes	Not assessed
11:118295882:A:G	rs73026643	AMICA1.8232.90.3	COVID_B1	36	-0.0826122	0.0354593	0.0348368	0.577448	0.4854	0.0749	9.13338e-11	-0.086416	0.16887	0.608839	Yes	Not assessed
11:118306637:G:T	rs146411033	AMICA1.8232.90.3	COVID_B1	36	-0.0826122	0.0354593	0.0348368	0.577448	-0.9143	0.1832	6.01545e-07	-0.56204	0.40524	0.165463	No	Not a missense variant or in LD with missense variants
11:118335978:G:C	rs149673438	AMICA1.8232.90.3	COVID_B1	36	-0.0826122	0.0354593	0.0348368	0.577448	0.4476	0.071	2.89639e-10	0.0028658	0.15278	0.985034	Yes	Not assessed
11:118348793:C:T	rs140572326	AMICA1.8232.90.3	COVID_B1	36	-0.0826122	0.0354593	0.0348368	0.577448	-0.7436	0.1586	2.75182e-06	0.32256	0.23619	0.172039	Yes	Not assessed
11:118361311:C:T	rs77806521	AMICA1.8232.90.3	COVID_B1	36	-0.0826122	0.0354593	0.0348368	0.577448	-0.6364	0.078	3.37881e-16	0.13074	0.14021	0.3511	Yes	Not assessed
11:118398959:A:G	rs45529532	AMICA1.8232.90.3	COVID_B1	36	-0.0826122	0.0354593	0.0348368	0.577448	-0.5483	0.0973	1.74907e-08	0.097093	0.16928	0.566263	Yes	Not assessed
11:118402248:A:G	rs12420093	AMICA1.8232.90.3	COVID_B1	36	-0.0826122	0.0354593	0.0348368	0.577448	0.4124	0.0633	7.26858e-11	-0.11431	0.12691	0.367739	Yes	Not assessed
11:118403526:T:G	rs148247831	AMICA1.8232.90.3	COVID_B1	36	-0.0826122	0.0354593	0.0348368	0.577448	-0.4759	0.0758	3.42154e-10	0.16739	0.14338	0.243026	Yes	Not assessed
11:118483791:G:C	rs9332795	AMICA1.8232.90.3	COVID_B1	36	-0.0826122	0.0354593	0.0348368	0.577448	0.5636	0.0898	3.47016e-10	-0.13044	0.18713	0.485768	Yes	Not assessed
11:118532247:G:T	rs45558732	AMICA1.8232.90.3	COVID_B1	36	-0.0826122	0.0354593	0.0348368	0.577448	0.3949	0.0685	8.16755e-09	0.13668	0.15474	0.377081	Yes	Not assessed
11:118653094:T:C	rs72999483	AMICA1.8232.90.3	COVID_B1	36	-0.0826122	0.0354593	0.0348368	0.577448	0.2905	0.0415	2.55963e-12	0.070296	0.071603	0.326225	Yes	Not assessed
11:118713138:C:T	rs12803363	AMICA1.8232.90.3	COVID_B1	36	-0.0826122	0.0354593	0.0348368	0.577448	-0.313	0.06	1.82172e-07	0.021974	0.1092	0.840521	Yes	Not assessed
11:118865528:C:CG	rs60431460	AMICA1.8232.90.3	COVID_B1	36	-0.0826122	0.0354593	0.0348368	0.577448	-0.1558	0.0244	1.71122e-10	-0.087823	0.055075	0.1108	Yes	Not assessed
11:117929586:A:G	rs11604677	AMICA1.8232.90.3	COVID_B2	36	-0.0698391	0.0354593	0.0348368	0.577448	-0.1419	0.0245	6.96208e-09	0.022859	0.02455	0.351791	Yes	Not assessed
11:118013226:C:G	rs11216678	AMICA1.8232.90.3	COVID_B2	36	-0.0698391	0.0354593	0.0348368	0.577448	0.317	0.0476	2.74455e-11	-0.11451	0.045648	0.012123	Yes	Not assessed
11:118083366:A:G	rs657118	AMICA1.8232.90.3	COVID_B2	36	-0.0698391	0.0354593	0.0348368	0.577448	-0.1411	0.025	1.66144e-08	-0.02548	0.023886	0.286092	Yes	Not assessed
11:118146823:T:C	rs117181393	AMICA1.8232.90.3	COVID_B2	36	-0.0698391	0.0354593	0.0348368	0.577448	-0.3765	0.0654	8.56824e-09	0.12286	0.064972	0.0586286	Yes	Not assessed
11:118155254:C:T	rs645451	AMICA1.8232.90.3	COVID_B2	36	-0.0698391	0.0354593	0.0348368	0.577448	-0.2568	0.0514	5.84986e-07	-0.077077	0.047487	0.104564	Yes	Not assessed
11:118156691:A:C	rs117493218	AMICA1.8232.90.3	COVID_B2	36	-0.0698391	0.0354593	0.0348368	0.577448	-0.418	0.0608	6.19899e-12	0.14054	0.059005	0.0172268	Yes	Not assessed
11:118161508:C:T	rs116979688	AMICA1.8232.90.3	COVID_B2	36	-0.0698391	0.0354593	0.0348368	0.577448	0.3858	0.0785	8.89414e-07	-0.23648	0.090108	0.00868002	Yes	Not assessed
11:118170218:T:C	rs144511511	AMICA1.8232.90.3	COVID_B2	36	-0.0698391	0.0354593	0.0348368	0.577448	0.4619	0.0838	3.54914e-08	-0.072519	0.11735	0.536594	Yes	Not assessed
11:118183048:G:A	rs12801779	AMICA1.8232.90.3	COVID_B2	36	-0.0698391	0.0354593	0.0348368	0.577448	-0.8224	0.0988	8.5125e-17	-0.048786	0.12989	0.707218	Yes	Not assessed
11:118192634:A:G	rs113521822	AMICA1.8232.90.3	COVID_B2	36	-0.0698391	0.0354593	0.0348368	0.577448	-0.4866	0.0597	3.61663e-16	0.0053421	0.046247	0.908039	Yes	Not assessed
11:118193315:G:T	rs45555132	AMICA1.8232.90.3	COVID_B2	36	-0.0698391	0.0354593	0.0348368	0.577448	-0.6533	0.0978	2.39009e-11	0.066348	0.089996	0.460981	Yes	Not assessed
11:118206239:C:G	rs11600544	AMICA1.8232.90.3	COVID_B2	36	-0.0698391	0.0354593	0.0348368	0.577448	0.9964	0.018	0	-0.062989	0.024279	0.00947611	Yes	Not assessed
11:118209234:G:A	rs188755908	AMICA1.8232.90.3	COVID_B2	36	-0.0698391	0.0354593	0.0348368	0.577448	-0.6241	0.137	5.22675e-06	0.28127	0.16835	0.094772	Yes	Not assessed
11:118220543:C:G	rs77280285	AMICA1.8232.90.3	COVID_B2	36	-0.0698391	0.0354593	0.0348368	0.577448	0.6648	0.0837	1.97903e-15	-0.091335	0.063376	0.149539	Yes	Not assessed
11:118244616:C:T	rs75458655	AMICA1.8232.90.3	COVID_B2	36	-0.0698391	0.0354593	0.0348368	0.577448	0.4746	0.0821	7.4366e-09	0.0070427	0.092184	0.939102	Yes	Not assessed
11:118251488:T:G	rs117864380	AMICA1.8232.90.3	COVID_B2	36	-0.0698391	0.0354593	0.0348368	0.577448	-0.5958	0.1143	1.86214e-07	0.039711	0.12181	0.744419	Yes	Not assessed
11:118263192:TTAAAG:T	rs1157490573	AMICA1.8232.90.3	COVID_B2	36	-0.0698391	0.0354593	0.0348368	0.577448	-0.5089	0.0937	5.59879e-08	-0.24677	0.11977	0.0393636	Yes	Not assessed
11:118263321:T:C	rs189554439	AMICA1.8232.90.3	COVID_B2	36	-0.0698391	0.0354593	0.0348368	0.577448	-0.5438	0.1155	2.49883e-06	-0.011215	0.1371	0.934804	Yes	Not assessed
11:118275068:CT:C	rs146289219	AMICA1.8232.90.3	COVID_B2	36	-0.0698391	0.0354593	0.0348368	0.577448	-0.6858	0.0773	7.18905e-19	-0.089828	0.094065	0.3396	Yes	Not assessed
11:118277556:C:T	rs2187557	AMICA1.8232.90.3	COVID_B2	36	-0.0698391	0.0354593	0.0348368	0.577448	-0.315	0.0281	3.6434e-29	0.018264	0.025419	0.472438	Yes	Not assessed
11:118295882:A:G	rs73026643	AMICA1.8232.90.3	COVID_B2	36	-0.0698391	0.0354593	0.0348368	0.577448	0.4854	0.0749	9.13338e-11	0.078813	0.070205	0.261602	Yes	Not assessed
11:118306637:G:T	rs146411033	AMICA1.8232.90.3	COVID_B2	36	-0.0698391	0.0354593	0.0348368	0.577448	-0.9143	0.1832	6.01545e-07	0.1207	0.31188	0.69875	No	Not a missense variant or in LD with missense variants
11:118316501:A:G	rs73014296	AMICA1.8232.90.3	COVID_B2	36	-0.0698391	0.0354593	0.0348368	0.577448	0.381	0.0622	9.0455e-10	0.078435	0.058202	0.177776	Yes	Not assessed
11:118335978:G:C	rs149673438	AMICA1.8232.90.3	COVID_B2	36	-0.0698391	0.0354593	0.0348368	0.577448	0.4476	0.071	2.89639e-10	0.032229	0.075178	0.66814	Yes	Not assessed
11:118348793:C:T	rs140572326	AMICA1.8232.90.3	COVID_B2	36	-0.0698391	0.0354593	0.0348368	0.577448	-0.7436	0.1586	2.75182e-06	0.085172	0.18216	0.640094	Yes	Not assessed
11:118361311:C:T	rs77806521	AMICA1.8232.90.3	COVID_B2	36	-0.0698391	0.0354593	0.0348368	0.577448	-0.6364	0.078	3.37881e-16	-0.009783	0.072499	0.892659	Yes	Not assessed
11:118398959:A:G	rs45529532	AMICA1.8232.90.3	COVID_B2	36	-0.0698391	0.0354593	0.0348368	0.577448	-0.5483	0.0973	1.74907e-08	0.16038	0.077067	0.0374297	Yes	Not assessed
11:118402248:A:G	rs12420093	AMICA1.8232.90.3	COVID_B2	36	-0.0698391	0.0354593	0.0348368	0.577448	0.4124	0.0633	7.26858e-11	-0.13704	0.072276	0.0579514	Yes	Not assessed
11:118403526:T:G	rs148247831	AMICA1.8232.90.3	COVID_B2	36	-0.0698391	0.0354593	0.0348368	0.577448	-0.4759	0.0758	3.42154e-10	0.18313	0.086776	0.034826	Yes	Not assessed
11:118483791:G:C	rs9332795	AMICA1.8232.90.3	COVID_B2	36	-0.0698391	0.0354593	0.0348368	0.577448	0.5636	0.0898	3.47016e-10	0.076735	0.10649	0.471165	Yes	Not assessed
11:118520660:A:G	rs576950	AMICA1.8232.90.3	COVID_B2	36	-0.0698391	0.0354593	0.0348368	0.577448	-0.2563	0.0268	1.13914e-21	-0.026368	0.028158	0.349052	Yes	Not assessed
11:118532247:G:T	rs45558732	AMICA1.8232.90.3	COVID_B2	36	-0.0698391	0.0354593	0.0348368	0.577448	0.3949	0.0685	8.16755e-09	0.086469	0.082382	0.293897	Yes	Not assessed
11:118653094:T:C	rs72999483	AMICA1.8232.90.3	COVID_B2	36	-0.0698391	0.0354593	0.0348368	0.577448	0.2905	0.0415	2.55963e-12	0.0074567	0.041053	0.855868	Yes	Not assessed
11:118713138:C:T	rs12803363	AMICA1.8232.90.3	COVID_B2	36	-0.0698391	0.0354593	0.0348368	0.577448	-0.313	0.06	1.82172e-07	0.11687	0.062709	0.0623656	Yes	Not assessed
11:118865528:C:CG	rs60431460	AMICA1.8232.90.3	COVID_B2	36	-0.0698391	0.0354593	0.0348368	0.577448	-0.1558	0.0244	1.71122e-10	-0.027908	0.026939	0.300216	Yes	Not assessed
1:153875146:G:A	rs111795967	IL6R.8092.29.3	COVID_B2	39	-0.0624651	0.0249301	0.0359722	0.577448	0.4444	0.0756	4.14484e-09	0.011813	0.067162	0.860382	Yes	Not assessed
1:153891132:T:C	rs137949898	IL6R.8092.29.3	COVID_B2	39	-0.0624651	0.0249301	0.0359722	0.577448	0.3969	0.0889	8.02309e-06	-0.068786	0.090796	0.448697	Yes	Not assessed
1:154182111:T:C	rs61806853	IL6R.8092.29.3	COVID_B2	39	-0.0624651	0.0249301	0.0359722	0.577448	0.4936	0.0573	7.03637e-18	0.042149	0.052511	0.422166	Yes	Not assessed
1:154291980:C:A	rs11810847	IL6R.8092.29.3	COVID_B2	39	-0.0624651	0.0249301	0.0359722	0.577448	-0.1876	0.04	2.73205e-06	0.054865	0.034402	0.110752	Yes	Not assessed
1:154370041:C:T	rs79438587	IL6R.8092.29.3	COVID_B2	39	-0.0624651	0.0249301	0.0359722	0.577448	0.3917	0.0338	4.699e-31	-0.0075833	0.0365	0.835415	Yes	Not assessed
1:154395747:G:A	rs147763778	IL6R.8092.29.3	COVID_B2	39	-0.0624651	0.0249301	0.0359722	0.577448	0.4384	0.0596	1.89922e-13	0.016105	0.063664	0.800292	Yes	Not assessed
1:154420375:G:A	rs146389272	IL6R.8092.29.3	COVID_B2	39	-0.0624651	0.0249301	0.0359722	0.577448	0.4935	0.0697	1.43797e-12	0.010446	0.072898	0.886056	Yes	Not assessed
1:154421941:T:A	rs4601580	IL6R.8092.29.3	COVID_B2	39	-0.0624651	0.0249301	0.0359722	0.577448	0.3413	0.0259	1.18078e-39	0.030346	0.026152	0.245898	Yes	Not assessed
1:154430995:G:A	rs143318546	IL6R.8092.29.3	COVID_B2	39	-0.0624651	0.0249301	0.0359722	0.577448	-0.8036	0.1437	2.24203e-08	0.0098687	0.19565	0.959771	No	Not a missense variant or in LD with missense variants
1:154431149:G:A	rs540848324	IL6R.8092.29.3	COVID_B2	39	-0.0624651	0.0249301	0.0359722	0.577448	0.7295	0.1447	4.61981e-07	0.18473	0.19679	0.347876	Yes	Not assessed
1:154431978:C:T	rs116037345	IL6R.8092.29.3	COVID_B2	39	-0.0624651	0.0249301	0.0359722	0.577448	-0.6086	0.0713	1.39232e-17	-0.07279	0.060966	0.2325	Yes	Not assessed
1:154436958:A:G	rs79778789	IL6R.8092.29.3	COVID_B2	39	-0.0624651	0.0249301	0.0359722	0.577448	0.849	0.0884	7.68467e-22	-0.095142	0.091676	0.29936	Yes	Not assessed
1:154439292:G:A	rs76093405	IL6R.8092.29.3	COVID_B2	39	-0.0624651	0.0249301	0.0359722	0.577448	-0.6381	0.0777	2.16892e-16	-0.08405	0.076458	0.271639	Yes	Not assessed
1:154443199:G:T	rs79219014	IL6R.8092.29.3	COVID_B2	39	-0.0624651	0.0249301	0.0359722	0.577448	0.7069	0.0768	3.43499e-20	-0.0034654	0.071393	0.961286	Yes	Not assessed
1:154443202:A:G	rs558681060	IL6R.8092.29.3	COVID_B2	39	-0.0624651	0.0249301	0.0359722	0.577448	0.9886	0.1634	1.44681e-09	0.17325	0.24375	0.477227	No	Not a missense variant or in LD with missense variants
1:154443593:G:A	rs116141616	IL6R.8092.29.3	COVID_B2	39	-0.0624651	0.0249301	0.0359722	0.577448	-0.4697	0.0721	7.29015e-11	0.037899	0.065158	0.560804	Yes	Not assessed
1:154444329:C:T	rs139952834	IL6R.8092.29.3	COVID_B2	39	-0.0624651	0.0249301	0.0359722	0.577448	-0.6409	0.1072	2.2514e-09	0.046198	0.12999	0.722293	Yes	Not assessed
1:154447857:G:A	rs113580743	IL6R.8092.29.3	COVID_B2	39	-0.0624651	0.0249301	0.0359722	0.577448	-0.525	0.0605	4.03903e-18	0.083711	0.073293	0.253395	Yes	Not assessed
1:154453714:G:A	rs12739228	IL6R.8092.29.3	COVID_B2	39	-0.0624651	0.0249301	0.0359722	0.577448	-0.6425	0.0648	3.57814e-23	0.014053	0.060148	0.815264	Yes	Not assessed
1:154453788:C:T	rs4129267	IL6R.8092.29.3	COVID_B2	39	-0.0624651	0.0249301	0.0359722	0.577448	1.1023	0.0159	0	-0.065937	0.021362	0.00202426	Yes	Not assessed
1:154466204:G:A	rs35013949	IL6R.8092.29.3	COVID_B2	39	-0.0624651	0.0249301	0.0359722	0.577448	0.6456	0.1285	5.05734e-07	-0.0012969	0.14613	0.992919	Yes	Not assessed
1:154467408:CTT:C	rs143915141	IL6R.8092.29.3	COVID_B2	39	-0.0624651	0.0249301	0.0359722	0.577448	-0.5791	0.1218	1.98923e-06	0.12255	0.068925	0.0754006	Yes	Not assessed
1:154470538:C:T	rs79925547	IL6R.8092.29.3	COVID_B2	39	-0.0624651	0.0249301	0.0359722	0.577448	0.779	0.1154	1.47404e-11	-0.074897	0.11901	0.529131	Yes	Not assessed
1:154497349:T:C	rs140615642	IL6R.8092.29.3	COVID_B2	39	-0.0624651	0.0249301	0.0359722	0.577448	0.5638	0.0836	1.54064e-11	-0.097382	0.12693	0.442957	Yes	Not assessed
1:154511179:A:G	rs116059394	IL6R.8092.29.3	COVID_B2	39	-0.0624651	0.0249301	0.0359722	0.577448	-0.5916	0.056	4.36277e-26	0.070142	0.059776	0.24063	Yes	Not assessed
1:154525677:T:C	rs75631461	IL6R.8092.29.3	COVID_B2	39	-0.0624651	0.0249301	0.0359722	0.577448	0.6022	0.0958	3.25724e-10	-0.026714	0.089556	0.765479	Yes	Not assessed
1:154529836:C:T	rs116710125	IL6R.8092.29.3	COVID_B2	39	-0.0624651	0.0249301	0.0359722	0.577448	-0.5956	0.0558	1.34939e-26	-0.047614	0.066365	0.473092	Yes	Not assessed
1:154536585:G:A	rs147830103	IL6R.8092.29.3	COVID_B2	39	-0.0624651	0.0249301	0.0359722	0.577448	-0.6744	0.084	9.86142e-16	0.055926	0.072516	0.440575	Yes	Not assessed
1:154543928:C:T	rs76289529	IL6R.8092.29.3	COVID_B2	39	-0.0624651	0.0249301	0.0359722	0.577448	0.6686	0.0678	6.12164e-23	0.075949	0.068312	0.266226	Yes	Not assessed
1:154558912:G:A	rs145464582	IL6R.8092.29.3	COVID_B2	39	-0.0624651	0.0249301	0.0359722	0.577448	0.6622	0.1007	4.83376e-11	-0.020542	0.14065	0.883882	Yes	Not assessed
1:154562004:C:T	rs149551556	IL6R.8092.29.3	COVID_B2	39	-0.0624651	0.0249301	0.0359722	0.577448	-0.5627	0.0949	3.04045e-09	0.13097	0.09891	0.185459	Yes	Not assessed
1:154569241:G:A	rs138398618	IL6R.8092.29.3	COVID_B2	39	-0.0624651	0.0249301	0.0359722	0.577448	-0.4872	0.1028	2.14458e-06	0.15628	0.11287	0.166174	Yes	Not assessed
1:154577015:G:C	rs12125018	IL6R.8092.29.3	COVID_B2	39	-0.0624651	0.0249301	0.0359722	0.577448	0.5227	0.1062	8.57319e-07	0.12146	0.12233	0.320764	Yes	Not assessed
1:154607518:G:A	rs145558655	IL6R.8092.29.3	COVID_B2	39	-0.0624651	0.0249301	0.0359722	0.577448	0.6572	0.1161	1.50812e-08	0.19428	0.16511	0.239327	Yes	Not assessed
1:154659152:ACTGCG:A	rs201012281	IL6R.8092.29.3	COVID_B2	39	-0.0624651	0.0249301	0.0359722	0.577448	0.7369	0.0885	8.32298e-17	-0.060411	0.10827	0.576867	Yes	Not assessed
1:154678568:C:G	rs6426877	IL6R.8092.29.3	COVID_B2	39	-0.0624651	0.0249301	0.0359722	0.577448	-0.2553	0.0248	7.47188e-25	-0.011054	0.028772	0.700835	Yes	Not assessed
1:154716012:T:C	rs58892549	IL6R.8092.29.3	COVID_B2	39	-0.0624651	0.0249301	0.0359722	0.577448	0.4402	0.0536	2.16294e-16	-0.046758	0.042845	0.275128	Yes	Not assessed
1:154725148:C:G	rs141444337	IL6R.8092.29.3	COVID_B2	39	-0.0624651	0.0249301	0.0359722	0.577448	-0.4572	0.0637	7.10527e-13	0.0049014	0.073537	0.946859	Yes	Not assessed
1:154734827:G:A	rs72700223	IL6R.8092.29.3	COVID_B2	39	-0.0624651	0.0249301	0.0359722	0.577448	-0.2645	0.052	3.64658e-07	-0.049028	0.045295	0.279068	Yes	Not assessed
11:117929586:A:G	rs11604677	AMICA1.8232.90.3	COVID_C2	36	-0.0268209	0.0354593	0.0348368	0.577448	-0.1419	0.0245	6.96208e-09	0.00025829	0.013558	0.984801	Yes	Not assessed
11:118013226:C:G	rs11216678	AMICA1.8232.90.3	COVID_C2	36	-0.0268209	0.0354593	0.0348368	0.577448	0.317	0.0476	2.74455e-11	-0.026302	0.027677	0.34195	Yes	Not assessed
11:118083366:A:G	rs657118	AMICA1.8232.90.3	COVID_C2	36	-0.0268209	0.0354593	0.0348368	0.577448	-0.1411	0.025	1.66144e-08	-0.004129	0.013364	0.757349	Yes	Not assessed
11:118155254:C:T	rs645451	AMICA1.8232.90.3	COVID_C2	36	-0.0268209	0.0354593	0.0348368	0.577448	-0.2568	0.0514	5.84986e-07	-0.014494	0.026622	0.586141	Yes	Not assessed
11:118156691:A:C	rs117493218	AMICA1.8232.90.3	COVID_C2	36	-0.0268209	0.0354593	0.0348368	0.577448	-0.418	0.0608	6.19899e-12	0.08095	0.035176	0.0213755	Yes	Not assessed
11:118157379:C:T	rs876479	AMICA1.8232.90.3	COVID_C2	36	-0.0268209	0.0354593	0.0348368	0.577448	0.2342	0.0256	5.77629e-20	-0.028069	0.014874	0.0591444	Yes	Not assessed
11:118161508:C:T	rs116979688	AMICA1.8232.90.3	COVID_C2	36	-0.0268209	0.0354593	0.0348368	0.577448	0.3858	0.0785	8.89414e-07	-0.027867	0.050262	0.579281	Yes	Not assessed
11:118170218:T:C	rs144511511	AMICA1.8232.90.3	COVID_C2	36	-0.0268209	0.0354593	0.0348368	0.577448	0.4619	0.0838	3.54914e-08	0.01845	0.070166	0.792591	Yes	Not assessed
11:118183048:G:A	rs12801779	AMICA1.8232.90.3	COVID_C2	36	-0.0268209	0.0354593	0.0348368	0.577448	-0.8224	0.0988	8.5125e-17	-0.12628	0.073295	0.0849065	Yes	Not assessed
11:118192634:A:G	rs113521822	AMICA1.8232.90.3	COVID_C2	36	-0.0268209	0.0354593	0.0348368	0.577448	-0.4866	0.0597	3.61663e-16	0.027197	0.028126	0.333559	Yes	Not assessed
11:118193315:G:T	rs45555132	AMICA1.8232.90.3	COVID_C2	36	-0.0268209	0.0354593	0.0348368	0.577448	-0.6533	0.0978	2.39009e-11	0.05599	0.055888	0.316428	Yes	Not assessed
11:118206239:C:G	rs11600544	AMICA1.8232.90.3	COVID_C2	36	-0.0268209	0.0354593	0.0348368	0.577448	0.9964	0.018	0	-0.019499	0.013693	0.154443	Yes	Not assessed
11:118209234:G:A	rs188755908	AMICA1.8232.90.3	COVID_C2	36	-0.0268209	0.0354593	0.0348368	0.577448	-0.6241	0.137	5.22675e-06	-0.0081724	0.0969	0.932787	Yes	Not assessed
11:118220543:C:G	rs77280285	AMICA1.8232.90.3	COVID_C2	36	-0.0268209	0.0354593	0.0348368	0.577448	0.6648	0.0837	1.97903e-15	0.0080451	0.04009	0.840952	Yes	Not assessed
11:118244616:C:T	rs75458655	AMICA1.8232.90.3	COVID_C2	36	-0.0268209	0.0354593	0.0348368	0.577448	0.4746	0.0821	7.4366e-09	0.011242	0.05223	0.82958	Yes	Not assessed
11:118251488:T:G	rs117864380	AMICA1.8232.90.3	COVID_C2	36	-0.0268209	0.0354593	0.0348368	0.577448	-0.5958	0.1143	1.86214e-07	0.025833	0.076973	0.737164	Yes	Not assessed
11:118262596:T:A	rs74543584	AMICA1.8232.90.3	COVID_C2	36	-0.0268209	0.0354593	0.0348368	0.577448	-0.8273	0.1391	2.72236e-09	-0.032611	0.13145	0.804067	No	Not a missense variant or in LD with missense variants
11:118263192:TTAAAG:T	rs1157490573	AMICA1.8232.90.3	COVID_C2	36	-0.0268209	0.0354593	0.0348368	0.577448	-0.5089	0.0937	5.59879e-08	-0.048086	0.065841	0.465185	Yes	Not assessed
11:118263321:T:C	rs189554439	AMICA1.8232.90.3	COVID_C2	36	-0.0268209	0.0354593	0.0348368	0.577448	-0.5438	0.1155	2.49883e-06	-0.07324	0.086639	0.397917	Yes	Not assessed
11:118264079:A:AGCCC	rs201577748	AMICA1.8232.90.3	COVID_C2	36	-0.0268209	0.0354593	0.0348368	0.577448	0.3929	0.0636	6.50533e-10	0.0092149	0.059801	0.877537	Yes	Not assessed
11:118275068:CT:C	rs146289219	AMICA1.8232.90.3	COVID_C2	36	-0.0268209	0.0354593	0.0348368	0.577448	-0.6858	0.0773	7.18905e-19	-0.013505	0.053086	0.799188	Yes	Not assessed
11:118277556:C:T	rs2187557	AMICA1.8232.90.3	COVID_C2	36	-0.0268209	0.0354593	0.0348368	0.577448	-0.315	0.0281	3.6434e-29	0.013671	0.014493	0.345536	Yes	Not assessed
11:118295882:A:G	rs73026643	AMICA1.8232.90.3	COVID_C2	36	-0.0268209	0.0354593	0.0348368	0.577448	0.4854	0.0749	9.13338e-11	0.022819	0.045564	0.616503	Yes	Not assessed
11:118306637:G:T	rs146411033	AMICA1.8232.90.3	COVID_C2	36	-0.0268209	0.0354593	0.0348368	0.577448	-0.9143	0.1832	6.01545e-07	0.11014	0.13483	0.413997	No	Not a missense variant or in LD with missense variants
11:118335978:G:C	rs149673438	AMICA1.8232.90.3	COVID_C2	36	-0.0268209	0.0354593	0.0348368	0.577448	0.4476	0.071	2.89639e-10	-0.001265	0.047259	0.978645	Yes	Not assessed
11:118348793:C:T	rs140572326	AMICA1.8232.90.3	COVID_C2	36	-0.0268209	0.0354593	0.0348368	0.577448	-0.7436	0.1586	2.75182e-06	0.1554	0.091432	0.0892017	Yes	Not assessed
11:118361311:C:T	rs77806521	AMICA1.8232.90.3	COVID_C2	36	-0.0268209	0.0354593	0.0348368	0.577448	-0.6364	0.078	3.37881e-16	0.03012	0.045097	0.504201	Yes	Not assessed
11:118398959:A:G	rs45529532	AMICA1.8232.90.3	COVID_C2	36	-0.0268209	0.0354593	0.0348368	0.577448	-0.5483	0.0973	1.74907e-08	0.090079	0.050557	0.074793	Yes	Not assessed
11:118402248:A:G	rs12420093	AMICA1.8232.90.3	COVID_C2	36	-0.0268209	0.0354593	0.0348368	0.577448	0.4124	0.0633	7.26858e-11	-0.093366	0.037497	0.0127758	Yes	Not assessed
11:118403526:T:G	rs148247831	AMICA1.8232.90.3	COVID_C2	36	-0.0268209	0.0354593	0.0348368	0.577448	-0.4759	0.0758	3.42154e-10	0.12042	0.047774	0.0117149	Yes	Not assessed
11:118483791:G:C	rs9332795	AMICA1.8232.90.3	COVID_C2	36	-0.0268209	0.0354593	0.0348368	0.577448	0.5636	0.0898	3.47016e-10	0.012031	0.058016	0.835718	Yes	Not assessed
11:118520660:A:G	rs576950	AMICA1.8232.90.3	COVID_C2	36	-0.0268209	0.0354593	0.0348368	0.577448	-0.2563	0.0268	1.13914e-21	-0.003384	0.016798	0.840345	Yes	Not assessed
11:118532247:G:T	rs45558732	AMICA1.8232.90.3	COVID_C2	36	-0.0268209	0.0354593	0.0348368	0.577448	0.3949	0.0685	8.16755e-09	0.041942	0.04674	0.369534	Yes	Not assessed
11:118653094:T:C	rs72999483	AMICA1.8232.90.3	COVID_C2	36	-0.0268209	0.0354593	0.0348368	0.577448	0.2905	0.0415	2.55963e-12	-0.0284	0.023354	0.22396	Yes	Not assessed
11:118865528:C:CG	rs60431460	AMICA1.8232.90.3	COVID_C2	36	-0.0268209	0.0354593	0.0348368	0.577448	-0.1558	0.0244	1.71122e-10	-0.019736	0.017111	0.248742	Yes	Not assessed
1:153875146:G:A	rs111795967	IL6R.8092.29.3	COVID_C2	39	-0.0295671	0.0249301	0.0359722	0.577448	0.4444	0.0756	4.14484e-09	0.029837	0.041844	0.475813	Yes	Not assessed
1:153891132:T:C	rs137949898	IL6R.8092.29.3	COVID_C2	39	-0.0295671	0.0249301	0.0359722	0.577448	0.3969	0.0889	8.02309e-06	-0.10251	0.0546	0.0604534	Yes	Not assessed
1:154182111:T:C	rs61806853	IL6R.8092.29.3	COVID_C2	39	-0.0295671	0.0249301	0.0359722	0.577448	0.4936	0.0573	7.03637e-18	-0.0026723	0.033647	0.936697	Yes	Not assessed
1:154291980:C:A	rs11810847	IL6R.8092.29.3	COVID_C2	39	-0.0295671	0.0249301	0.0359722	0.577448	-0.1876	0.04	2.73205e-06	0.032877	0.020897	0.115652	Yes	Not assessed
1:154370041:C:T	rs79438587	IL6R.8092.29.3	COVID_C2	39	-0.0295671	0.0249301	0.0359722	0.577448	0.3917	0.0338	4.699e-31	-0.02627	0.020288	0.195371	Yes	Not assessed
1:154395747:G:A	rs147763778	IL6R.8092.29.3	COVID_C2	39	-0.0295671	0.0249301	0.0359722	0.577448	0.4384	0.0596	1.89922e-13	-0.022735	0.037237	0.541498	Yes	Not assessed
1:154420375:G:A	rs146389272	IL6R.8092.29.3	COVID_C2	39	-0.0295671	0.0249301	0.0359722	0.577448	0.4935	0.0697	1.43797e-12	0.023594	0.040397	0.559184	Yes	Not assessed
1:154421941:T:A	rs4601580	IL6R.8092.29.3	COVID_C2	39	-0.0295671	0.0249301	0.0359722	0.577448	0.3413	0.0259	1.18078e-39	0.009619	0.014823	0.516388	Yes	Not assessed
1:154430995:G:A	rs143318546	IL6R.8092.29.3	COVID_C2	39	-0.0295671	0.0249301	0.0359722	0.577448	-0.8036	0.1437	2.24203e-08	0.15676	0.11742	0.181864	No	Not a missense variant or in LD with missense variants
1:154431149:G:A	rs540848324	IL6R.8092.29.3	COVID_C2	39	-0.0295671	0.0249301	0.0359722	0.577448	0.7295	0.1447	4.61981e-07	-0.099476	0.11193	0.374146	Yes	Not assessed
1:154431978:C:T	rs116037345	IL6R.8092.29.3	COVID_C2	39	-0.0295671	0.0249301	0.0359722	0.577448	-0.6086	0.0713	1.39232e-17	-0.056808	0.039211	0.1474	Yes	Not assessed
1:154436958:A:G	rs79778789	IL6R.8092.29.3	COVID_C2	39	-0.0295671	0.0249301	0.0359722	0.577448	0.849	0.0884	7.68467e-22	-0.010044	0.054668	0.854227	Yes	Not assessed
1:154439292:G:A	rs76093405	IL6R.8092.29.3	COVID_C2	39	-0.0295671	0.0249301	0.0359722	0.577448	-0.6381	0.0777	2.16892e-16	-0.067726	0.046099	0.141794	Yes	Not assessed
1:154443199:G:T	rs79219014	IL6R.8092.29.3	COVID_C2	39	-0.0295671	0.0249301	0.0359722	0.577448	0.7069	0.0768	3.43499e-20	-0.028099	0.045915	0.540552	Yes	Not assessed
1:154443202:A:G	rs558681060	IL6R.8092.29.3	COVID_C2	39	-0.0295671	0.0249301	0.0359722	0.577448	0.9886	0.1634	1.44681e-09	0.15656	0.12755	0.219657	No	Not a missense variant or in LD with missense variants
1:154443593:G:A	rs116141616	IL6R.8092.29.3	COVID_C2	39	-0.0295671	0.0249301	0.0359722	0.577448	-0.4697	0.0721	7.29015e-11	0.033828	0.041611	0.416242	Yes	Not assessed
1:154444329:C:T	rs139952834	IL6R.8092.29.3	COVID_C2	39	-0.0295671	0.0249301	0.0359722	0.577448	-0.6409	0.1072	2.2514e-09	0.057804	0.068287	0.397282	Yes	Not assessed
1:154447857:G:A	rs113580743	IL6R.8092.29.3	COVID_C2	39	-0.0295671	0.0249301	0.0359722	0.577448	-0.525	0.0605	4.03903e-18	0.006471	0.03935	0.869379	Yes	Not assessed
1:154453714:G:A	rs12739228	IL6R.8092.29.3	COVID_C2	39	-0.0295671	0.0249301	0.0359722	0.577448	-0.6425	0.0648	3.57814e-23	-0.016866	0.037223	0.650472	Yes	Not assessed
1:154453788:C:T	rs4129267	IL6R.8092.29.3	COVID_C2	39	-0.0295671	0.0249301	0.0359722	0.577448	1.1023	0.0159	0	-0.03555	0.013199	0.00707304	Yes	Not assessed
1:154466204:G:A	rs35013949	IL6R.8092.29.3	COVID_C2	39	-0.0295671	0.0249301	0.0359722	0.577448	0.6456	0.1285	5.05734e-07	-0.13683	0.077549	0.0776591	Yes	Not assessed
1:154467408:CTT:C	rs143915141	IL6R.8092.29.3	COVID_C2	39	-0.0295671	0.0249301	0.0359722	0.577448	-0.5791	0.1218	1.98923e-06	0.075274	0.041642	0.0706616	Yes	Not assessed
1:154470538:C:T	rs79925547	IL6R.8092.29.3	COVID_C2	39	-0.0295671	0.0249301	0.0359722	0.577448	0.779	0.1154	1.47404e-11	0.052387	0.071202	0.461882	Yes	Not assessed
1:154497349:T:C	rs140615642	IL6R.8092.29.3	COVID_C2	39	-0.0295671	0.0249301	0.0359722	0.577448	0.5638	0.0836	1.54064e-11	0.0040122	0.063258	0.949427	Yes	Not assessed
1:154511179:A:G	rs116059394	IL6R.8092.29.3	COVID_C2	39	-0.0295671	0.0249301	0.0359722	0.577448	-0.5916	0.056	4.36277e-26	0.045514	0.033217	0.170624	Yes	Not assessed
1:154525677:T:C	rs75631461	IL6R.8092.29.3	COVID_C2	39	-0.0295671	0.0249301	0.0359722	0.577448	0.6022	0.0958	3.25724e-10	0.0098566	0.04809	0.837602	Yes	Not assessed
1:154529836:C:T	rs116710125	IL6R.8092.29.3	COVID_C2	39	-0.0295671	0.0249301	0.0359722	0.577448	-0.5956	0.0558	1.34939e-26	-0.029882	0.035055	0.393974	Yes	Not assessed
1:154536585:G:A	rs147830103	IL6R.8092.29.3	COVID_C2	39	-0.0295671	0.0249301	0.0359722	0.577448	-0.6744	0.084	9.86142e-16	-0.0091992	0.044831	0.837418	Yes	Not assessed
1:154543928:C:T	rs76289529	IL6R.8092.29.3	COVID_C2	39	-0.0295671	0.0249301	0.0359722	0.577448	0.6686	0.0678	6.12164e-23	0.065402	0.040398	0.10546	Yes	Not assessed
1:154558912:G:A	rs145464582	IL6R.8092.29.3	COVID_C2	39	-0.0295671	0.0249301	0.0359722	0.577448	0.6622	0.1007	4.83376e-11	-0.046232	0.069489	0.50585	Yes	Not assessed
1:154562004:C:T	rs149551556	IL6R.8092.29.3	COVID_C2	39	-0.0295671	0.0249301	0.0359722	0.577448	-0.5627	0.0949	3.04045e-09	0.025028	0.060008	0.676622	Yes	Not assessed
1:154569241:G:A	rs138398618	IL6R.8092.29.3	COVID_C2	39	-0.0295671	0.0249301	0.0359722	0.577448	-0.4872	0.1028	2.14458e-06	0.11439	0.065837	0.0823037	Yes	Not assessed
1:154577015:G:C	rs12125018	IL6R.8092.29.3	COVID_C2	39	-0.0295671	0.0249301	0.0359722	0.577448	0.5227	0.1062	8.57319e-07	0.015952	0.064854	0.805707	Yes	Not assessed
1:154607518:G:A	rs145558655	IL6R.8092.29.3	COVID_C2	39	-0.0295671	0.0249301	0.0359722	0.577448	0.6572	0.1161	1.50812e-08	0.031139	0.082071	0.704379	Yes	Not assessed
1:154659152:ACTGCG:A	rs201012281	IL6R.8092.29.3	COVID_C2	39	-0.0295671	0.0249301	0.0359722	0.577448	0.7369	0.0885	8.32298e-17	-0.04559	0.067196	0.497478	Yes	Not assessed
1:154678568:C:G	rs6426877	IL6R.8092.29.3	COVID_C2	39	-0.0295671	0.0249301	0.0359722	0.577448	-0.2553	0.0248	7.47188e-25	-0.00038807	0.018552	0.983311	Yes	Not assessed
1:154716012:T:C	rs58892549	IL6R.8092.29.3	COVID_C2	39	-0.0295671	0.0249301	0.0359722	0.577448	0.4402	0.0536	2.16294e-16	-0.011843	0.026303	0.652528	Yes	Not assessed
1:154725148:C:G	rs141444337	IL6R.8092.29.3	COVID_C2	39	-0.0295671	0.0249301	0.0359722	0.577448	-0.4572	0.0637	7.10527e-13	-0.033631	0.041054	0.412678	Yes	Not assessed
1:154734827:G:A	rs72700223	IL6R.8092.29.3	COVID_C2	39	-0.0295671	0.0249301	0.0359722	0.577448	-0.2645	0.052	3.64658e-07	-0.050207	0.026034	0.0537909	Yes	Not assessed
5:156659687:G:C	rs530423599	HAVCR1.9021.1.3	COVID_B2	9	-0.126613	0.0571124	0.0266293	0.624968	-0.7151	0.1429	5.60949e-07	0.11696	0.20026	0.559193	No	Not a missense variant or in LD with missense variants
5:156677273:C:T	rs13189396	HAVCR1.9021.1.3	COVID_B2	9	-0.126613	0.0571124	0.0266293	0.624968	-0.5919	0.1259	2.58447e-06	0.10529	0.1618	0.515213	Yes	Not assessed
5:156849475:C:T	rs72803090	HAVCR1.9021.1.3	COVID_B2	9	-0.126613	0.0571124	0.0266293	0.624968	-0.1579	0.0255	5.93464e-10	0.014237	0.027151	0.600026	Yes	Not assessed
5:157039767:T:C	rs6889164	HAVCR1.9021.1.3	COVID_B2	9	-0.126613	0.0571124	0.0266293	0.624968	-0.4257	0.0262	2.30426e-59	0.054702	0.028785	0.0573853	Yes	Not assessed
5:157045616:TA:T	rs147859844	HAVCR1.9021.1.3	COVID_B2	9	-0.126613	0.0571124	0.0266293	0.624968	0.3953	0.0872	5.80811e-06	0.03835	0.1085	0.723746	Yes	Not assessed
5:157055285:C:G	rs56084311	HAVCR1.9021.1.3	COVID_B2	9	-0.126613	0.0571124	0.0266293	0.624968	-1.0496	0.1112	3.76897e-21	0.25208	0.15953	0.114074	Yes	Not assessed
5:157060224:T:C	rs4704841	HAVCR1.9021.1.3	COVID_B2	9	-0.126613	0.0571124	0.0266293	0.624968	0.2674	0.0262	1.86186e-24	-0.0044213	0.028513	0.876772	Yes	Not assessed
5:157073920:A:T	rs2862720	HAVCR1.9021.1.3	COVID_B2	9	-0.126613	0.0571124	0.0266293	0.624968	-0.2375	0.0408	5.84691e-09	0.03278	0.040493	0.418215	Yes	Not assessed
5:157287198:A:G	rs17655440	HAVCR1.9021.1.3	COVID_B2	9	-0.126613	0.0571124	0.0266293	0.624968	-0.3526	0.0792	8.50662e-06	0.12493	0.071277	0.0796468	Yes	Not assessed
5:156352280:AC:A	rs565668498	HAVCR2.5134.52.2	COVID_B2	17	0.0881206	0.0402971	0.0287593	0.624968	0.5299	0.1171	6.03407e-06	-0.025799	0.13036	0.843119	Yes	Not assessed
5:156366975:A:G	rs11741970	HAVCR2.5134.52.2	COVID_B2	17	0.0881206	0.0402971	0.0287593	0.624968	0.238	0.0421	1.57482e-08	0.046045	0.037197	0.215765	Yes	Not assessed
5:156676126:C:T	rs32081	HAVCR2.5134.52.2	COVID_B2	17	0.0881206	0.0402971	0.0287593	0.624968	-0.3628	0.0774	2.76781e-06	0.015909	0.092509	0.863459	Yes	Not assessed
5:156837113:G:A	rs80042789	HAVCR2.5134.52.2	COVID_B2	17	0.0881206	0.0402971	0.0287593	0.624968	0.5412	0.1211	7.85737e-06	0.093441	0.075748	0.217361	Yes	Not assessed
5:156979709:C:G	rs4704831	HAVCR2.5134.52.2	COVID_B2	17	0.0881206	0.0402971	0.0287593	0.624968	-0.1489	0.0262	1.32193e-08	-0.028379	0.025363	0.263177	Yes	Not assessed
5:157100241:G:A	rs73308313	HAVCR2.5134.52.2	COVID_B2	17	0.0881206	0.0402971	0.0287593	0.624968	-0.2028	0.0444	4.93417e-06	0.026301	0.0421	0.53215	Yes	Not assessed
5:157103019:C:T	rs574904410	HAVCR2.5134.52.2	COVID_B2	17	0.0881206	0.0402971	0.0287593	0.624968	0.7735	0.1242	4.72854e-10	-0.012882	0.228	0.954943	No	Not a missense variant or in LD with missense variants
5:157105355:C:A	rs7445342	HAVCR2.5134.52.2	COVID_B2	17	0.0881206	0.0402971	0.0287593	0.624968	-0.7355	0.0286	7.58758e-146	-0.061361	0.031081	0.0483558	Yes	Not assessed
5:157106375:C:T	rs149887583	HAVCR2.5134.52.2	COVID_B2	17	0.0881206	0.0402971	0.0287593	0.624968	0.6383	0.1144	2.41148e-08	-0.062545	0.15027	0.677251	Yes	Not assessed
5:157129472:A:G	rs137998443	HAVCR2.5134.52.2	COVID_B2	17	0.0881206	0.0402971	0.0287593	0.624968	0.8296	0.1742	1.91359e-06	0.051864	0.24903	0.835023	No	Not a missense variant or in LD with missense variants
5:157146907:C:T	rs190411505	HAVCR2.5134.52.2	COVID_B2	17	0.0881206	0.0402971	0.0287593	0.624968	1.0578	0.1884	1.96961e-08	-0.05845	0.2502	0.815285	Yes	Not assessed
5:157175578:G:T	rs60714766	HAVCR2.5134.52.2	COVID_B2	17	0.0881206	0.0402971	0.0287593	0.624968	-0.2107	0.0279	4.28719e-14	-0.0008211	0.029291	0.977636	Yes	Not assessed
5:157204589:C:T	rs190229691	HAVCR2.5134.52.2	COVID_B2	17	0.0881206	0.0402971	0.0287593	0.624968	0.5565	0.1232	6.27084e-06	0.12444	0.15936	0.434877	Yes	Not assessed
5:157239789:T:G	rs30118	HAVCR2.5134.52.2	COVID_B2	17	0.0881206	0.0402971	0.0287593	0.624968	-0.1255	0.0256	9.46999e-07	-0.013393	0.022047	0.543536	Yes	Not assessed
5:157320322:AC:A	rs544637895	HAVCR2.5134.52.2	COVID_B2	17	0.0881206	0.0402971	0.0287593	0.624968	0.6018	0.1032	5.49658e-09	-0.069233	0.14996	0.644313	Yes	Not assessed
5:157590095:C:G	rs79027205	HAVCR2.5134.52.2	COVID_B2	17	0.0881206	0.0402971	0.0287593	0.624968	0.3746	0.0787	1.93739e-06	0.0084772	0.089	0.924117	Yes	Not assessed
5:157595894:T:C	rs115698787	HAVCR2.5134.52.2	COVID_B2	17	0.0881206	0.0402971	0.0287593	0.624968	0.2067	0.0391	1.24716e-07	0.0080679	0.034282	0.813945	Yes	Not assessed
6:73695048:C:T	rs79717953	CD109.3290.50.2	COVID_B2	9	0.104316	0.0474695	0.0279817	0.624968	0.6499	0.1182	3.83453e-08	-0.069448	0.15568	0.655529	Yes	Not assessed
6:73711300:C:G	rs72953385	CD109.3290.50.2	COVID_B2	9	0.104316	0.0474695	0.0279817	0.624968	0.5089	0.0533	1.32425e-21	0.074934	0.053309	0.159827	Yes	Not assessed
6:73741552:G:C	rs13195592	CD109.3290.50.2	COVID_B2	9	0.104316	0.0474695	0.0279817	0.624968	0.5064	0.0935	6.09325e-08	0.060989	0.10193	0.549612	Yes	Not assessed
6:73752687:G:A	rs78274829	CD109.3290.50.2	COVID_B2	9	0.104316	0.0474695	0.0279817	0.624968	-0.3236	0.0675	1.63428e-06	0.087658	0.074679	0.240476	Yes	Not assessed
6:73794007:G:A	rs6903575	CD109.3290.50.2	COVID_B2	9	0.104316	0.0474695	0.0279817	0.624968	0.4146	0.0236	4.34732e-69	0.045059	0.020592	0.0286565	Yes	Not assessed
6:73817320:T:G	rs41307147	CD109.3290.50.2	COVID_B2	9	0.104316	0.0474695	0.0279817	0.624968	-0.2585	0.0584	9.58322e-06	-0.13935	0.071568	0.0515228	Yes	Not assessed
6:73851003:G:A	rs576021126	CD109.3290.50.2	COVID_B2	9	0.104316	0.0474695	0.0279817	0.624968	0.2882	0.0601	1.62398e-06	-0.074142	0.10495	0.479908	Yes	Not assessed
6:73874677:TA:T	rs1237066073	CD109.3290.50.2	COVID_B2	9	0.104316	0.0474695	0.0279817	0.624968	-0.2667	0.0541	8.23308e-07	0.014746	0.048116	0.759249	Yes	Not assessed
6:74040903:C:T	rs12665559	CD109.3290.50.2	COVID_B2	9	0.104316	0.0474695	0.0279817	0.624968	0.1223	0.0255	1.61802e-06	0.017398	0.024252	0.473137	Yes	Not assessed
19:51477049:T:G	rs115494840	SIGLEC14.8248.222.3	COVID_B2	21	0.0525225	0.0240359	0.0288764	0.624968	-0.2956	0.0451	5.58946e-11	0.031398	0.038221	0.41137	Yes	Not assessed
19:51502415:G:A	rs1551556	SIGLEC14.8248.222.3	COVID_B2	21	0.0525225	0.0240359	0.0288764	0.624968	0.2275	0.0252	1.75193e-19	0.0242	0.021346	0.25692	Yes	Not assessed
19:51508750:C:G	rs116875108	SIGLEC14.8248.222.3	COVID_B2	21	0.0525225	0.0240359	0.0288764	0.624968	0.5171	0.0845	9.38537e-10	0.045639	0.098266	0.64233	Yes	Not assessed
19:51556454:T:A	rs12980547	SIGLEC14.8248.222.3	COVID_B2	21	0.0525225	0.0240359	0.0288764	0.624968	0.4539	0.0828	4.2082e-08	0.24431	0.11469	0.033157	Yes	Not assessed
19:51573721:C:T	rs8110809	SIGLEC14.8248.222.3	COVID_B2	21	0.0525225	0.0240359	0.0288764	0.624968	-0.2389	0.0246	2.69655e-22	-0.033673	0.021256	0.113156	Yes	Not assessed
19:51593650:G:A	rs57351606	SIGLEC14.8248.222.3	COVID_B2	21	0.0525225	0.0240359	0.0288764	0.624968	-0.3857	0.0441	2.20987e-18	-0.05237	0.037604	0.163719	Yes	Not assessed
19:51599350:C:G	rs55712999	SIGLEC14.8248.222.3	COVID_B2	21	0.0525225	0.0240359	0.0288764	0.624968	-0.2	0.026	1.44505e-14	-0.0057508	0.027025	0.831486	Yes	Not assessed
19:51600530:A:G	rs11672546	SIGLEC14.8248.222.3	COVID_B2	21	0.0525225	0.0240359	0.0288764	0.624968	0.333	0.0482	4.89068e-12	-0.00032545	0.048975	0.994698	Yes	Not assessed
19:51606866:C:T	rs144234698	SIGLEC14.8248.222.3	COVID_B2	21	0.0525225	0.0240359	0.0288764	0.624968	-0.7819	0.1375	1.29635e-08	-0.12774	0.17153	0.456447	Yes	Not assessed
19:51611832:T:A	rs74861892	SIGLEC14.8248.222.3	COVID_B2	21	0.0525225	0.0240359	0.0288764	0.624968	-1.2673	0.1611	3.64577e-15	-0.42845	0.23945	0.0735651	Yes	Not assessed
19:51612691:C:G	rs73050865	SIGLEC14.8248.222.3	COVID_B2	21	0.0525225	0.0240359	0.0288764	0.624968	-1.0255	0.0691	7.97862e-50	0.016217	0.059107	0.783803	Yes	Not assessed
19:51619189:C:T	rs138536366	SIGLEC14.8248.222.3	COVID_B2	21	0.0525225	0.0240359	0.0288764	0.624968	0.2719	0.0378	6.33265e-13	-0.019791	0.036474	0.587401	Yes	Not assessed
19:51627384:T:A	rs1106476	SIGLEC14.8248.222.3	COVID_B2	21	0.0525225	0.0240359	0.0288764	0.624968	-1.1918	0.0317	0	-0.069527	0.034612	0.0445632	Yes	Not assessed
19:51628480:A:G	rs4284742	SIGLEC14.8248.222.3	COVID_B2	21	0.0525225	0.0240359	0.0288764	0.624968	-0.3876	0.0304	3.11745e-37	-0.052812	0.029409	0.07253	Yes	Not assessed
19:51657400:T:C	rs142507298	SIGLEC14.8248.222.3	COVID_B2	21	0.0525225	0.0240359	0.0288764	0.624968	-1.2719	0.1339	2.1216e-21	-0.030176	0.19463	0.876787	Yes	Not assessed
19:51668989:C:T	rs10409116	SIGLEC14.8248.222.3	COVID_B2	21	0.0525225	0.0240359	0.0288764	0.624968	-0.2475	0.0268	2.58106e-20	-0.0021971	0.023272	0.924784	Yes	Not assessed
19:51676686:T:C	rs12974234	SIGLEC14.8248.222.3	COVID_B2	21	0.0525225	0.0240359	0.0288764	0.624968	-0.2724	0.0257	3.0047e-26	0.0015185	0.027119	0.955347	Yes	Not assessed
19:51676749:C:T	rs114049499	SIGLEC14.8248.222.3	COVID_B2	21	0.0525225	0.0240359	0.0288764	0.624968	0.196	0.0387	4.0926e-07	-0.049127	0.042191	0.244264	Yes	Not assessed
19:51712063:G:A	rs7252881	SIGLEC14.8248.222.3	COVID_B2	21	0.0525225	0.0240359	0.0288764	0.624968	0.2458	0.0273	2.1831e-19	0.04228	0.029353	0.149755	Yes	Not assessed
19:51894424:G:A	rs148610266	SIGLEC14.8248.222.3	COVID_B2	21	0.0525225	0.0240359	0.0288764	0.624968	-0.5082	0.066	1.36066e-14	0.086623	0.093353	0.353455	Yes	Not assessed
19:51981613:A:G	rs76530089	SIGLEC14.8248.222.3	COVID_B2	21	0.0525225	0.0240359	0.0288764	0.624968	-0.8522	0.1827	3.09403e-06	0.19649	0.26811	0.463637	Yes	Not assessed
5:156677273:C:T	rs13189396	HAVCR1.9021.1.3	COVID_D1	9	0.121943	0.0571124	0.0266293	0.624968	-0.5919	0.1259	2.58447e-06	-0.1565	0.16544	0.344168	Yes	Not assessed
5:156849475:C:T	rs72803090	HAVCR1.9021.1.3	COVID_D1	9	0.121943	0.0571124	0.0266293	0.624968	-0.1579	0.0255	5.93464e-10	-0.055026	0.028357	0.0523222	Yes	Not assessed
5:157039767:T:C	rs6889164	HAVCR1.9021.1.3	COVID_D1	9	0.121943	0.0571124	0.0266293	0.624968	-0.4257	0.0262	2.30426e-59	-0.062222	0.034747	0.0733389	Yes	Not assessed
5:157045616:TA:T	rs147859844	HAVCR1.9021.1.3	COVID_D1	9	0.121943	0.0571124	0.0266293	0.624968	0.3953	0.0872	5.80811e-06	0.013406	0.17745	0.939779	Yes	Not assessed
5:157055285:C:G	rs56084311	HAVCR1.9021.1.3	COVID_D1	9	0.121943	0.0571124	0.0266293	0.624968	-1.0496	0.1112	3.76897e-21	0.051451	0.11533	0.655511	Yes	Not assessed
5:157060224:T:C	rs4704841	HAVCR1.9021.1.3	COVID_D1	9	0.121943	0.0571124	0.0266293	0.624968	0.2674	0.0262	1.86186e-24	0.041296	0.029203	0.157332	Yes	Not assessed
5:157073920:A:T	rs2862720	HAVCR1.9021.1.3	COVID_D1	9	0.121943	0.0571124	0.0266293	0.624968	-0.2375	0.0408	5.84691e-09	-0.033504	0.046937	0.475346	Yes	Not assessed
5:157166109:C:T	rs144795715	HAVCR1.9021.1.3	COVID_D1	9	0.121943	0.0571124	0.0266293	0.624968	-0.8479	0.1739	1.08373e-06	0.034222	0.32295	0.915609	No	Not a missense variant or in LD with missense variants
5:157287198:A:G	rs17655440	HAVCR1.9021.1.3	COVID_D1	9	0.121943	0.0571124	0.0266293	0.624968	-0.3526	0.0792	8.50662e-06	-0.14813	0.078179	0.058125	Yes	Not assessed
3:52003106:G:C	rs139537794	ITIH1.7955.195.3	COVID_A2	17	0.0851286	0.0429926	0.047695	0.62829	-0.4523	0.0826	4.35572e-08	-0.087184	0.13142	0.507075	Yes	Not assessed		cis-eqtl	whether snp has effect on gene expression in any tissues assessed in the Open Targets Genetics Portal
3:52178645:G:C	rs3852070	ITIH1.7955.195.3	COVID_A2	17	0.0851286	0.0429926	0.047695	0.62829	0.1227	0.0254	1.36048e-06	-0.048365	0.043133	0.262161	Yes	Not assessed		missense	whether snp is a missense variant
3:52280647:C:T	rs73088790	ITIH1.7955.195.3	COVID_A2	17	0.0851286	0.0429926	0.047695	0.62829	0.2152	0.0487	9.92086e-06	0.049261	0.069778	0.480208	Yes	Not assessed
3:52315831:A:G	rs17327818	ITIH1.7955.195.3	COVID_A2	17	0.0851286	0.0429926	0.047695	0.62829	-0.3676	0.0603	1.08629e-09	-0.021444	0.068558	0.754443	Yes	Not assessed
3:52359426:C:G	rs2306864	ITIH1.7955.195.3	COVID_A2	17	0.0851286	0.0429926	0.047695	0.62829	0.3122	0.0419	9.25834e-14	-0.061045	0.064071	0.340706	Yes	Not assessed
3:52422026:C:T	rs114199672	ITIH1.7955.195.3	COVID_A2	17	0.0851286	0.0429926	0.047695	0.62829	-0.3438	0.0714	1.47107e-06	0.014842	0.097718	0.879277	Yes	Not assessed
3:52533061:G:A	rs75586899	ITIH1.7955.195.3	COVID_A2	17	0.0851286	0.0429926	0.047695	0.62829	-0.5391	0.096	1.95853e-08	-0.073288	0.12802	0.567002	Yes	Not assessed
3:52659350:G:C	rs35198201	ITIH1.7955.195.3	COVID_A2	17	0.0851286	0.0429926	0.047695	0.62829	0.2475	0.0412	1.8866e-09	-0.045816	0.046727	0.326838	Yes	Not assessed
3:52667950:G:A	rs34537989	ITIH1.7955.195.3	COVID_A2	17	0.0851286	0.0429926	0.047695	0.62829	-0.4832	0.0685	1.73828e-12	-0.14339	0.10587	0.17561	Yes	Not assessed
3:52727554:C:T	rs35386691	ITIH1.7955.195.3	COVID_A2	17	0.0851286	0.0429926	0.047695	0.62829	0.3311	0.0511	9.20563e-11	-0.032565	0.060067	0.587719	Yes	Not assessed
3:52786995:A:G	rs1042779	ITIH1.7955.195.3	COVID_A2	17	0.0851286	0.0429926	0.047695	0.62829	-0.6463	0.0231	2.98013e-172	-0.05598	0.028028	0.0457939	Yes	Not assessed
3:52835814:G:C	rs146671178	ITIH1.7955.195.3	COVID_A2	17	0.0851286	0.0429926	0.047695	0.62829	0.5001	0.0958	1.78681e-07	0.084301	0.16989	0.619747	Yes	Not assessed
3:53016732:C:T	rs77432708	ITIH1.7955.195.3	COVID_A2	17	0.0851286	0.0429926	0.047695	0.62829	-0.5034	0.0694	4.05831e-13	-0.0132	0.079604	0.868298	Yes	Not assessed
3:53119661:C:CTA	rs201731603	ITIH1.7955.195.3	COVID_A2	17	0.0851286	0.0429926	0.047695	0.62829	-0.4861	0.0759	1.50883e-10	0.17514	0.11758	0.136345	Yes	Not assessed
3:53178558:C:G	rs2306571	ITIH1.7955.195.3	COVID_A2	17	0.0851286	0.0429926	0.047695	0.62829	-0.1199	0.0252	1.95582e-06	-0.067054	0.038355	0.0804213	Yes	Not assessed
3:53248533:C:G	rs11720625	ITIH1.7955.195.3	COVID_A2	17	0.0851286	0.0429926	0.047695	0.62829	-0.1468	0.0248	3.23207e-09	-0.021825	0.036443	0.549253	Yes	Not assessed
3:53522631:G:T	rs3774424	ITIH1.7955.195.3	COVID_A2	17	0.0851286	0.0429926	0.047695	0.62829	-0.131	0.0282	3.39434e-06	0.020704	0.043143	0.631304	Yes	Not assessed
20:32730144:A:C	rs5022933	BPIFB1.11246.3.3	COVID_A2	12	0.130505	0.0647193	0.0437494	0.62829	-0.269	0.0603	8.15674e-06	-0.093104	0.089445	0.297918	Yes	Not assessed
20:32809452:GATTC:G	rs138092501	BPIFB1.11246.3.3	COVID_A2	12	0.130505	0.0647193	0.0437494	0.62829	-0.1264	0.0251	4.75717e-07	-0.024782	0.037922	0.513434	Yes	Not assessed
20:32993353:G:A	rs4911112	BPIFB1.11246.3.3	COVID_A2	12	0.130505	0.0647193	0.0437494	0.62829	0.1896	0.026	3.0469e-13	0.052232	0.02883	0.0700289	Yes	Not assessed
20:33062277:C:T	rs78868293	BPIFB1.11246.3.3	COVID_A2	12	0.130505	0.0647193	0.0437494	0.62829	-0.3688	0.0574	1.31794e-10	-0.09001	0.068399	0.188189	Yes	Not assessed
20:33085006:C:T	rs71349705	BPIFB1.11246.3.3	COVID_A2	12	0.130505	0.0647193	0.0437494	0.62829	-0.2757	0.059	2.97003e-06	-0.10167	0.077862	0.19163	Yes	Not assessed
20:33106254:C:T	rs2424961	BPIFB1.11246.3.3	COVID_A2	12	0.130505	0.0647193	0.0437494	0.62829	-0.4366	0.0245	4.90771e-71	-0.058453	0.037283	0.116923	Yes	Not assessed
20:33109389:T:C	rs6088102	BPIFB1.11246.3.3	COVID_A2	12	0.130505	0.0647193	0.0437494	0.62829	-0.1841	0.0254	4.22872e-13	0.0038804	0.028396	0.891305	Yes	Not assessed
20:33115542:A:C	rs542213402	BPIFB1.11246.3.3	COVID_A2	12	0.130505	0.0647193	0.0437494	0.62829	0.3262	0.0682	1.72706e-06	0.098508	0.13648	0.470432	Yes	Not assessed
20:33256503:TG:T	rs201624347	BPIFB1.11246.3.3	COVID_A2	12	0.130505	0.0647193	0.0437494	0.62829	-0.144	0.0309	3.15911e-06	0.0067603	0.044524	0.879317	Yes	Not assessed
20:33290337:C:T	rs1884886	BPIFB1.11246.3.3	COVID_A2	12	0.130505	0.0647193	0.0437494	0.62829	0.2408	0.0336	7.68458e-13	0.085361	0.052894	0.106568	Yes	Not assessed
20:33303949:T:C	rs117258330	BPIFB1.11246.3.3	COVID_A2	12	0.130505	0.0647193	0.0437494	0.62829	-1.1327	0.1455	6.97796e-15	-0.068601	0.22186	0.757163	Yes	Not assessed
20:33712865:G:A	rs34587839	BPIFB1.11246.3.3	COVID_A2	12	0.130505	0.0647193	0.0437494	0.62829	-0.1496	0.0335	7.9818e-06	0.010077	0.038256	0.792235	Yes	Not assessed
19:5571262:C:T	rs8104036	FUT5.4549.78.2	COVID_A2	19	-0.0793259	0.0403738	0.0494392	0.62829	-0.1475	0.0318	3.51177e-06	-0.0021679	0.043734	0.960465	Yes	Not assessed
19:5822661:G:A	rs138224262	FUT5.4549.78.2	COVID_A2	19	-0.0793259	0.0403738	0.0494392	0.62829	0.413	0.091	5.66661e-06	-0.18073	0.17439	0.300036	Yes	Not assessed
19:5830291:G:A	rs778809	FUT5.4549.78.2	COVID_A2	19	-0.0793259	0.0403738	0.0494392	0.62829	-0.58	0.025	4.55321e-119	0.080284	0.02892	0.005502	Yes	Not assessed
19:5838584:C:T	rs8101385	FUT5.4549.78.2	COVID_A2	19	-0.0793259	0.0403738	0.0494392	0.62829	-0.3948	0.0451	2.0614e-18	0.059438	0.047798	0.213674	Yes	Not assessed
19:5842308:T:A	rs28381972	FUT5.4549.78.2	COVID_A2	19	-0.0793259	0.0403738	0.0494392	0.62829	0.2639	0.0465	1.38471e-08	-0.032928	0.065923	0.617433	Yes	Not assessed
19:5842576:C:T	rs74663821	FUT5.4549.78.2	COVID_A2	19	-0.0793259	0.0403738	0.0494392	0.62829	-0.9122	0.0925	6.10552e-23	-0.073015	0.097292	0.45297	Yes	Not assessed
19:5850335:C:T	rs117095068	FUT5.4549.78.2	COVID_A2	19	-0.0793259	0.0403738	0.0494392	0.62829	0.7217	0.0997	4.52952e-13	0.25276	0.19307	0.190479	Yes	Not assessed
19:5851840:A:G	rs28362441	FUT5.4549.78.2	COVID_A2	19	-0.0793259	0.0403738	0.0494392	0.62829	0.3774	0.0753	5.38806e-07	-0.1244	0.098176	0.205115	Yes	Not assessed
19:5852910:G:A	rs28742583	FUT5.4549.78.2	COVID_A2	19	-0.0793259	0.0403738	0.0494392	0.62829	-0.4284	0.0759	1.65885e-08	0.27153	0.14143	0.0548718	Yes	Not assessed
19:5853390:G:A	rs34552692	FUT5.4549.78.2	COVID_A2	19	-0.0793259	0.0403738	0.0494392	0.62829	-0.1804	0.0273	3.89393e-11	-0.048324	0.041028	0.238864	Yes	Not assessed
19:5866062:A:C	rs8101625	FUT5.4549.78.2	COVID_A2	19	-0.0793259	0.0403738	0.0494392	0.62829	0.4083	0.0243	2.34093e-63	-0.017155	0.036517	0.638511	Yes	Not assessed
19:5887744:C:T	rs146992497	FUT5.4549.78.2	COVID_A2	19	-0.0793259	0.0403738	0.0494392	0.62829	-0.4398	0.0823	9.09859e-08	0.010596	0.10319	0.918213	Yes	Not assessed
19:5898622:C:T	rs4807822	FUT5.4549.78.2	COVID_A2	19	-0.0793259	0.0403738	0.0494392	0.62829	-0.2642	0.0245	4.11132e-27	0.054865	0.036461	0.132386	Yes	Not assessed
19:5905823:C:T	rs117517033	FUT5.4549.78.2	COVID_A2	19	-0.0793259	0.0403738	0.0494392	0.62829	0.4053	0.0813	6.1885e-07	0.14914	0.08561	0.0814934	Yes	Not assessed
19:5933096:G:A	rs41276876	FUT5.4549.78.2	COVID_A2	19	-0.0793259	0.0403738	0.0494392	0.62829	0.4134	0.0931	8.97974e-06	0.10578	0.15794	0.503018	Yes	Not assessed
19:5990944:T:C	rs8108685	FUT5.4549.78.2	COVID_A2	19	-0.0793259	0.0403738	0.0494392	0.62829	-0.403	0.0593	1.07599e-11	0.035131	0.098473	0.721273	Yes	Not assessed
19:5995571:T:C	rs2302222	FUT5.4549.78.2	COVID_A2	19	-0.0793259	0.0403738	0.0494392	0.62829	0.1811	0.0267	1.17892e-11	0.01647	0.038676	0.67022	Yes	Not assessed
19:6028489:A:G	rs76454064	FUT5.4549.78.2	COVID_A2	19	-0.0793259	0.0403738	0.0494392	0.62829	0.3804	0.0783	1.18435e-06	-0.011618	0.083729	0.889642	Yes	Not assessed
19:6074426:G:A	rs72991066	FUT5.4549.78.2	COVID_A2	19	-0.0793259	0.0403738	0.0494392	0.62829	0.3253	0.0519	3.66131e-10	0.053938	0.079644	0.498255	Yes	Not assessed
1:153472033:T:C	rs1853956	IL6R.4139.71.2	COVID_A2	39	-0.0493014	0.0249212	0.0478963	0.62829	-0.1652	0.036	4.45612e-06	0.028932	0.040668	0.476824	Yes	Not assessed
1:153875146:G:A	rs111795967	IL6R.4139.71.2	COVID_A2	39	-0.0493014	0.0249212	0.0478963	0.62829	0.4209	0.0756	2.58479e-08	0.10439	0.084257	0.215365	Yes	Not assessed
1:154055413:G:A	rs191486923	IL6R.4139.71.2	COVID_A2	39	-0.0493014	0.0249212	0.0478963	0.62829	0.6094	0.1376	9.4768e-06	-0.13051	0.12084	0.280132	Yes	Not assessed
1:154182111:T:C	rs61806853	IL6R.4139.71.2	COVID_A2	39	-0.0493014	0.0249212	0.0478963	0.62829	0.4957	0.0573	5.10681e-18	0.065648	0.064412	0.308113	Yes	Not assessed
1:154291980:C:A	rs11810847	IL6R.4139.71.2	COVID_A2	39	-0.0493014	0.0249212	0.0478963	0.62829	-0.1971	0.04	8.32884e-07	0.034735	0.045922	0.449415	Yes	Not assessed
1:154370041:C:T	rs79438587	IL6R.4139.71.2	COVID_A2	39	-0.0493014	0.0249212	0.0478963	0.62829	0.405	0.0338	4.40219e-33	0.074038	0.050121	0.139626	Yes	Not assessed
1:154395747:G:A	rs147763778	IL6R.4139.71.2	COVID_A2	39	-0.0493014	0.0249212	0.0478963	0.62829	0.4284	0.0596	6.5786e-13	-0.13932	0.090923	0.125452	Yes	Not assessed
1:154420375:G:A	rs146389272	IL6R.4139.71.2	COVID_A2	39	-0.0493014	0.0249212	0.0478963	0.62829	0.4949	0.0697	1.24369e-12	-0.0098092	0.10362	0.924581	Yes	Not assessed
1:154430995:G:A	rs143318546	IL6R.4139.71.2	COVID_A2	39	-0.0493014	0.0249212	0.0478963	0.62829	-0.766	0.1438	9.99346e-08	0.42623	0.24857	0.0863951	No	Not a missense variant or in LD with missense variants
1:154431149:G:A	rs540848324	IL6R.4139.71.2	COVID_A2	39	-0.0493014	0.0249212	0.0478963	0.62829	0.8297	0.1446	9.5859e-09	0.24138	0.26155	0.356068	Yes	Not assessed
1:154431978:C:T	rs116037345	IL6R.4139.71.2	COVID_A2	39	-0.0493014	0.0249212	0.0478963	0.62829	-0.5764	0.0714	6.86877e-16	-0.060944	0.076283	0.424337	Yes	Not assessed
1:154436958:A:G	rs79778789	IL6R.4139.71.2	COVID_A2	39	-0.0493014	0.0249212	0.0478963	0.62829	0.7852	0.0887	8.57253e-19	-0.15535	0.13002	0.232159	Yes	Not assessed
1:154439292:G:A	rs76093405	IL6R.4139.71.2	COVID_A2	39	-0.0493014	0.0249212	0.0478963	0.62829	-0.7066	0.0775	7.69344e-20	-0.18288	0.099173	0.0651758	Yes	Not assessed
1:154441428:G:A	rs114660934	IL6R.4139.71.2	COVID_A2	39	-0.0493014	0.0249212	0.0478963	0.62829	-0.4534	0.0592	1.87702e-14	0.073727	0.071462	0.302215	Yes	Not assessed
1:154443199:G:T	rs79219014	IL6R.4139.71.2	COVID_A2	39	-0.0493014	0.0249212	0.0478963	0.62829	0.7582	0.0767	4.82293e-23	-0.012005	0.089568	0.893377	Yes	Not assessed
1:154443202:A:G	rs558681060	IL6R.4139.71.2	COVID_A2	39	-0.0493014	0.0249212	0.0478963	0.62829	1.0061	0.1634	7.40037e-10	0.60372	0.34688	0.0817837	No	Not a missense variant or in LD with missense variants
1:154443593:G:A	rs116141616	IL6R.4139.71.2	COVID_A2	39	-0.0493014	0.0249212	0.0478963	0.62829	-0.4498	0.0722	4.66683e-10	0.04697	0.082635	0.569761	Yes	Not assessed
1:154444329:C:T	rs139952834	IL6R.4139.71.2	COVID_A2	39	-0.0493014	0.0249212	0.0478963	0.62829	-0.6506	0.1072	1.28685e-09	-0.11504	0.16943	0.497149	Yes	Not assessed
1:154447857:G:A	rs113580743	IL6R.4139.71.2	COVID_A2	39	-0.0493014	0.0249212	0.0478963	0.62829	-0.5141	0.0605	1.93683e-17	0.092923	0.10189	0.361772	Yes	Not assessed
1:154452980:G:A	rs12126142	IL6R.4139.71.2	COVID_A2	39	-0.0493014	0.0249212	0.0478963	0.62829	1.1104	0.0156	0	-0.061741	0.028446	0.0299718	Yes	Not assessed
1:154453714:G:A	rs12739228	IL6R.4139.71.2	COVID_A2	39	-0.0493014	0.0249212	0.0478963	0.62829	-0.6841	0.0647	3.9581e-26	-0.083646	0.077903	0.282948	Yes	Not assessed
1:154466204:G:A	rs35013949	IL6R.4139.71.2	COVID_A2	39	-0.0493014	0.0249212	0.0478963	0.62829	0.663	0.1285	2.47566e-07	-0.037024	0.19333	0.848129	Yes	Not assessed
1:154467408:CTT:C	rs143915141	IL6R.4139.71.2	COVID_A2	39	-0.0493014	0.0249212	0.0478963	0.62829	-0.541	0.1218	8.92477e-06	0.24775	0.12613	0.0495019	Yes	Not assessed
1:154470538:C:T	rs79925547	IL6R.4139.71.2	COVID_A2	39	-0.0493014	0.0249212	0.0478963	0.62829	0.752	0.1155	7.47404e-11	-0.059411	0.16724	0.722407	Yes	Not assessed
1:154497349:T:C	rs140615642	IL6R.4139.71.2	COVID_A2	39	-0.0493014	0.0249212	0.0478963	0.62829	0.5468	0.0836	6.12439e-11	-0.084224	0.17037	0.621052	Yes	Not assessed
1:154525677:T:C	rs75631461	IL6R.4139.71.2	COVID_A2	39	-0.0493014	0.0249212	0.0478963	0.62829	0.6628	0.0956	4.1185e-12	-0.054679	0.12687	0.66648	Yes	Not assessed
1:154529836:C:T	rs116710125	IL6R.4139.71.2	COVID_A2	39	-0.0493014	0.0249212	0.0478963	0.62829	-0.6158	0.0558	2.56635e-28	-0.076333	0.099838	0.444528	Yes	Not assessed
1:154536585:G:A	rs147830103	IL6R.4139.71.2	COVID_A2	39	-0.0493014	0.0249212	0.0478963	0.62829	-0.6467	0.084	1.3734e-14	-0.0032133	0.093788	0.972669	Yes	Not assessed
1:154543928:C:T	rs76289529	IL6R.4139.71.2	COVID_A2	39	-0.0493014	0.0249212	0.0478963	0.62829	0.6656	0.0678	9.50296e-23	0.068353	0.096908	0.480599	Yes	Not assessed
1:154558912:G:A	rs145464582	IL6R.4139.71.2	COVID_A2	39	-0.0493014	0.0249212	0.0478963	0.62829	0.7285	0.1006	4.43583e-13	0.18489	0.19561	0.344558	Yes	Not assessed
1:154562004:C:T	rs149551556	IL6R.4139.71.2	COVID_A2	39	-0.0493014	0.0249212	0.0478963	0.62829	-0.6651	0.0947	2.16795e-12	0.13209	0.11986	0.270446	Yes	Not assessed
1:154569241:G:A	rs138398618	IL6R.4139.71.2	COVID_A2	39	-0.0493014	0.0249212	0.0478963	0.62829	-0.5044	0.1027	9.04319e-07	-0.072157	0.14551	0.619972	Yes	Not assessed
1:154577015:G:C	rs12125018	IL6R.4139.71.2	COVID_A2	39	-0.0493014	0.0249212	0.0478963	0.62829	0.556	0.1062	1.64624e-07	0.12661	0.17038	0.457419	Yes	Not assessed
1:154584187:G:A	rs1127311	IL6R.4139.71.2	COVID_A2	39	-0.0493014	0.0249212	0.0478963	0.62829	0.2543	0.0245	3.07085e-25	-0.052412	0.027628	0.0578199	Yes	Not assessed
1:154659152:ACTGCG:A	rs201012281	IL6R.4139.71.2	COVID_A2	39	-0.0493014	0.0249212	0.0478963	0.62829	0.7864	0.0884	5.79333e-19	-0.0020308	0.15687	0.989671	Yes	Not assessed
1:154694215:G:A	rs6690912	IL6R.4139.71.2	COVID_A2	39	-0.0493014	0.0249212	0.0478963	0.62829	0.3835	0.0683	1.96637e-08	0.027486	0.080131	0.731588	Yes	Not assessed
1:154710300:C:T	rs11264245	IL6R.4139.71.2	COVID_A2	39	-0.0493014	0.0249212	0.0478963	0.62829	0.4469	0.0548	3.48864e-16	-0.11976	0.062848	0.0567086	Yes	Not assessed
1:154725148:C:G	rs141444337	IL6R.4139.71.2	COVID_A2	39	-0.0493014	0.0249212	0.0478963	0.62829	-0.4456	0.0637	2.6471e-12	-0.11733	0.10276	0.253543	Yes	Not assessed
1:154734827:G:A	rs72700223	IL6R.4139.71.2	COVID_A2	39	-0.0493014	0.0249212	0.0478963	0.62829	-0.234	0.052	6.79535e-06	-0.11483	0.073133	0.11638	Yes	Not assessed
6:32996479:T:C	rs73409695	TAPBP.12378.71.3	COVID_A2	14	0.0935714	0.0468518	0.0458055	0.62829	0.2798	0.0587	1.87352e-06	-0.040014	0.073227	0.584765	Yes	Not assessed
6:33064891:A:G	rs17214573	TAPBP.12378.71.3	COVID_A2	14	0.0935714	0.0468518	0.0458055	0.62829	0.2847	0.0319	4.46647e-19	0.057243	0.04616	0.214939	Yes	Not assessed
6:33125516:A:G	rs116026607	TAPBP.12378.71.3	COVID_A2	14	0.0935714	0.0468518	0.0458055	0.62829	0.6459	0.1343	1.51398e-06	-0.036446	0.1381	0.791849	Yes	Not assessed
6:33148933:A:G	rs3903051	TAPBP.12378.71.3	COVID_A2	14	0.0935714	0.0468518	0.0458055	0.62829	-0.1338	0.0257	1.9272e-07	-0.013036	0.03665	0.722074	Yes	Not assessed
6:33157187:G:A	rs55880953	TAPBP.12378.71.3	COVID_A2	14	0.0935714	0.0468518	0.0458055	0.62829	0.3002	0.033	9.28873e-20	0.02201	0.042819	0.607235	Yes	Not assessed
6:33288876:G:A	rs34931270	TAPBP.12378.71.3	COVID_A2	14	0.0935714	0.0468518	0.0458055	0.62829	-0.322	0.0728	9.73051e-06	0.013571	0.092973	0.883947	Yes	Not assessed
6:33304176:G:A	rs144706539	TAPBP.12378.71.3	COVID_A2	14	0.0935714	0.0468518	0.0458055	0.62829	1.9829	0.0964	5.1492e-94	0.17575	0.11302	0.119938	Yes	Not assessed
6:33313727:C:A	rs45583737	TAPBP.12378.71.3	COVID_A2	14	0.0935714	0.0468518	0.0458055	0.62829	-0.9305	0.1475	2.81799e-10	-0.22523	0.20662	0.275683	Yes	Not assessed
6:33340353:T:A	rs3130269	TAPBP.12378.71.3	COVID_A2	14	0.0935714	0.0468518	0.0458055	0.62829	-0.3938	0.0234	1.49456e-63	-0.0082003	0.036325	0.821397	Yes	Not assessed
6:33359045:G:A	rs145494894	TAPBP.12378.71.3	COVID_A2	14	0.0935714	0.0468518	0.0458055	0.62829	-0.375	0.0683	4.00836e-08	0.076441	0.12429	0.538541	Yes	Not assessed
6:33371704:A:T	rs9278026	TAPBP.12378.71.3	COVID_A2	14	0.0935714	0.0468518	0.0458055	0.62829	-0.1512	0.0338	7.69954e-06	0.010201	0.038364	0.790316	Yes	Not assessed
6:33523226:G:A	rs79586148	TAPBP.12378.71.3	COVID_A2	14	0.0935714	0.0468518	0.0458055	0.62829	-0.3278	0.0557	3.97816e-09	-0.11432	0.065137	0.0792473	Yes	Not assessed
6:33636212:G:A	rs9368769	TAPBP.12378.71.3	COVID_A2	14	0.0935714	0.0468518	0.0458055	0.62829	0.1463	0.0282	2.12629e-07	-0.013078	0.040369	0.745967	Yes	Not assessed
6:33886387:C:G	rs78995700	TAPBP.12378.71.3	COVID_A2	14	0.0935714	0.0468518	0.0458055	0.62829	0.2754	0.0622	9.52641e-06	-0.020937	0.085812	0.807241	Yes	Not assessed
1:153472033:T:C	rs1853956	IL6R.4139.71.2	COVID_B2	39	-0.0573112	0.0249212	0.0478963	0.62829	-0.1652	0.036	4.45612e-06	0.0081011	0.030537	0.790788	Yes	Not assessed
1:153875146:G:A	rs111795967	IL6R.4139.71.2	COVID_B2	39	-0.0573112	0.0249212	0.0478963	0.62829	0.4209	0.0756	2.58479e-08	0.011813	0.067162	0.860382	Yes	Not assessed
1:154055413:G:A	rs191486923	IL6R.4139.71.2	COVID_B2	39	-0.0573112	0.0249212	0.0478963	0.62829	0.6094	0.1376	9.4768e-06	-0.075316	0.098721	0.445512	Yes	Not assessed
1:154182111:T:C	rs61806853	IL6R.4139.71.2	COVID_B2	39	-0.0573112	0.0249212	0.0478963	0.62829	0.4957	0.0573	5.10681e-18	0.042149	0.052511	0.422166	Yes	Not assessed
1:154291980:C:A	rs11810847	IL6R.4139.71.2	COVID_B2	39	-0.0573112	0.0249212	0.0478963	0.62829	-0.1971	0.04	8.32884e-07	0.054865	0.034402	0.110752	Yes	Not assessed
1:154370041:C:T	rs79438587	IL6R.4139.71.2	COVID_B2	39	-0.0573112	0.0249212	0.0478963	0.62829	0.405	0.0338	4.40219e-33	-0.0075833	0.0365	0.835415	Yes	Not assessed
1:154395747:G:A	rs147763778	IL6R.4139.71.2	COVID_B2	39	-0.0573112	0.0249212	0.0478963	0.62829	0.4284	0.0596	6.5786e-13	0.016105	0.063664	0.800292	Yes	Not assessed
1:154420375:G:A	rs146389272	IL6R.4139.71.2	COVID_B2	39	-0.0573112	0.0249212	0.0478963	0.62829	0.4949	0.0697	1.24369e-12	0.010446	0.072898	0.886056	Yes	Not assessed
1:154421941:T:A	rs4601580	IL6R.4139.71.2	COVID_B2	39	-0.0573112	0.0249212	0.0478963	0.62829	0.3392	0.0259	3.44681e-39	0.030346	0.026152	0.245898	Yes	Not assessed
1:154430995:G:A	rs143318546	IL6R.4139.71.2	COVID_B2	39	-0.0573112	0.0249212	0.0478963	0.62829	-0.766	0.1438	9.99346e-08	0.0098687	0.19565	0.959771	No	Not a missense variant or in LD with missense variants
1:154431149:G:A	rs540848324	IL6R.4139.71.2	COVID_B2	39	-0.0573112	0.0249212	0.0478963	0.62829	0.8297	0.1446	9.5859e-09	0.18473	0.19679	0.347876	Yes	Not assessed
1:154431978:C:T	rs116037345	IL6R.4139.71.2	COVID_B2	39	-0.0573112	0.0249212	0.0478963	0.62829	-0.5764	0.0714	6.86877e-16	-0.07279	0.060966	0.2325	Yes	Not assessed
1:154436958:A:G	rs79778789	IL6R.4139.71.2	COVID_B2	39	-0.0573112	0.0249212	0.0478963	0.62829	0.7852	0.0887	8.57253e-19	-0.095142	0.091676	0.29936	Yes	Not assessed
1:154439292:G:A	rs76093405	IL6R.4139.71.2	COVID_B2	39	-0.0573112	0.0249212	0.0478963	0.62829	-0.7066	0.0775	7.69344e-20	-0.08405	0.076458	0.271639	Yes	Not assessed
1:154441428:G:A	rs114660934	IL6R.4139.71.2	COVID_B2	39	-0.0573112	0.0249212	0.0478963	0.62829	-0.4534	0.0592	1.87702e-14	0.087306	0.055838	0.117921	Yes	Not assessed
1:154443199:G:T	rs79219014	IL6R.4139.71.2	COVID_B2	39	-0.0573112	0.0249212	0.0478963	0.62829	0.7582	0.0767	4.82293e-23	-0.0034654	0.071393	0.961286	Yes	Not assessed
1:154443202:A:G	rs558681060	IL6R.4139.71.2	COVID_B2	39	-0.0573112	0.0249212	0.0478963	0.62829	1.0061	0.1634	7.40037e-10	0.17325	0.24375	0.477227	No	Not a missense variant or in LD with missense variants
1:154443593:G:A	rs116141616	IL6R.4139.71.2	COVID_B2	39	-0.0573112	0.0249212	0.0478963	0.62829	-0.4498	0.0722	4.66683e-10	0.037899	0.065158	0.560804	Yes	Not assessed
1:154444329:C:T	rs139952834	IL6R.4139.71.2	COVID_B2	39	-0.0573112	0.0249212	0.0478963	0.62829	-0.6506	0.1072	1.28685e-09	0.046198	0.12999	0.722293	Yes	Not assessed
1:154447857:G:A	rs113580743	IL6R.4139.71.2	COVID_B2	39	-0.0573112	0.0249212	0.0478963	0.62829	-0.5141	0.0605	1.93683e-17	0.083711	0.073293	0.253395	Yes	Not assessed
1:154452980:G:A	rs12126142	IL6R.4139.71.2	COVID_B2	39	-0.0573112	0.0249212	0.0478963	0.62829	1.1104	0.0156	0	-0.066898	0.021394	0.00176629	Yes	Not assessed
1:154453714:G:A	rs12739228	IL6R.4139.71.2	COVID_B2	39	-0.0573112	0.0249212	0.0478963	0.62829	-0.6841	0.0647	3.9581e-26	0.014053	0.060148	0.815264	Yes	Not assessed
1:154466204:G:A	rs35013949	IL6R.4139.71.2	COVID_B2	39	-0.0573112	0.0249212	0.0478963	0.62829	0.663	0.1285	2.47566e-07	-0.0012969	0.14613	0.992919	Yes	Not assessed
1:154467408:CTT:C	rs143915141	IL6R.4139.71.2	COVID_B2	39	-0.0573112	0.0249212	0.0478963	0.62829	-0.541	0.1218	8.92477e-06	0.12255	0.068925	0.0754006	Yes	Not assessed
1:154470538:C:T	rs79925547	IL6R.4139.71.2	COVID_B2	39	-0.0573112	0.0249212	0.0478963	0.62829	0.752	0.1155	7.47404e-11	-0.074897	0.11901	0.529131	Yes	Not assessed
1:154497349:T:C	rs140615642	IL6R.4139.71.2	COVID_B2	39	-0.0573112	0.0249212	0.0478963	0.62829	0.5468	0.0836	6.12439e-11	-0.097382	0.12693	0.442957	Yes	Not assessed
1:154525677:T:C	rs75631461	IL6R.4139.71.2	COVID_B2	39	-0.0573112	0.0249212	0.0478963	0.62829	0.6628	0.0956	4.1185e-12	-0.026714	0.089556	0.765479	Yes	Not assessed
1:154529836:C:T	rs116710125	IL6R.4139.71.2	COVID_B2	39	-0.0573112	0.0249212	0.0478963	0.62829	-0.6158	0.0558	2.56635e-28	-0.047614	0.066365	0.473092	Yes	Not assessed
1:154536585:G:A	rs147830103	IL6R.4139.71.2	COVID_B2	39	-0.0573112	0.0249212	0.0478963	0.62829	-0.6467	0.084	1.3734e-14	0.055926	0.072516	0.440575	Yes	Not assessed
1:154543928:C:T	rs76289529	IL6R.4139.71.2	COVID_B2	39	-0.0573112	0.0249212	0.0478963	0.62829	0.6656	0.0678	9.50296e-23	0.075949	0.068312	0.266226	Yes	Not assessed
1:154558912:G:A	rs145464582	IL6R.4139.71.2	COVID_B2	39	-0.0573112	0.0249212	0.0478963	0.62829	0.7285	0.1006	4.43583e-13	-0.020542	0.14065	0.883882	Yes	Not assessed
1:154562004:C:T	rs149551556	IL6R.4139.71.2	COVID_B2	39	-0.0573112	0.0249212	0.0478963	0.62829	-0.6651	0.0947	2.16795e-12	0.13097	0.09891	0.185459	Yes	Not assessed
1:154569241:G:A	rs138398618	IL6R.4139.71.2	COVID_B2	39	-0.0573112	0.0249212	0.0478963	0.62829	-0.5044	0.1027	9.04319e-07	0.15628	0.11287	0.166174	Yes	Not assessed
1:154577015:G:C	rs12125018	IL6R.4139.71.2	COVID_B2	39	-0.0573112	0.0249212	0.0478963	0.62829	0.556	0.1062	1.64624e-07	0.12146	0.12233	0.320764	Yes	Not assessed
1:154584187:G:A	rs1127311	IL6R.4139.71.2	COVID_B2	39	-0.0573112	0.0249212	0.0478963	0.62829	0.2543	0.0245	3.07085e-25	-0.027752	0.02173	0.201557	Yes	Not assessed
1:154659152:ACTGCG:A	rs201012281	IL6R.4139.71.2	COVID_B2	39	-0.0573112	0.0249212	0.0478963	0.62829	0.7864	0.0884	5.79333e-19	-0.060411	0.10827	0.576867	Yes	Not assessed
1:154694215:G:A	rs6690912	IL6R.4139.71.2	COVID_B2	39	-0.0573112	0.0249212	0.0478963	0.62829	0.3835	0.0683	1.96637e-08	-0.015883	0.064028	0.804085	Yes	Not assessed
1:154710300:C:T	rs11264245	IL6R.4139.71.2	COVID_B2	39	-0.0573112	0.0249212	0.0478963	0.62829	0.4469	0.0548	3.48864e-16	-0.096491	0.049227	0.0499814	Yes	Not assessed
1:154725148:C:G	rs141444337	IL6R.4139.71.2	COVID_B2	39	-0.0573112	0.0249212	0.0478963	0.62829	-0.4456	0.0637	2.6471e-12	0.0049014	0.073537	0.946859	Yes	Not assessed
1:154734827:G:A	rs72700223	IL6R.4139.71.2	COVID_B2	39	-0.0573112	0.0249212	0.0478963	0.62829	-0.234	0.052	6.79535e-06	-0.049028	0.045295	0.279068	Yes	Not assessed
1:153472033:T:C	rs1853956	IL6R.4139.71.2	COVID_C2	39	-0.0287866	0.0249212	0.0478963	0.62829	-0.1652	0.036	4.45612e-06	0.0072685	0.01865	0.696735	Yes	Not assessed
1:153875146:G:A	rs111795967	IL6R.4139.71.2	COVID_C2	39	-0.0287866	0.0249212	0.0478963	0.62829	0.4209	0.0756	2.58479e-08	0.029837	0.041844	0.475813	Yes	Not assessed
1:154055413:G:A	rs191486923	IL6R.4139.71.2	COVID_C2	39	-0.0287866	0.0249212	0.0478963	0.62829	0.6094	0.1376	9.4768e-06	-0.081241	0.064133	0.205242	Yes	Not assessed
1:154182111:T:C	rs61806853	IL6R.4139.71.2	COVID_C2	39	-0.0287866	0.0249212	0.0478963	0.62829	0.4957	0.0573	5.10681e-18	-0.0026723	0.033647	0.936697	Yes	Not assessed
1:154291980:C:A	rs11810847	IL6R.4139.71.2	COVID_C2	39	-0.0287866	0.0249212	0.0478963	0.62829	-0.1971	0.04	8.32884e-07	0.032877	0.020897	0.115652	Yes	Not assessed
1:154370041:C:T	rs79438587	IL6R.4139.71.2	COVID_C2	39	-0.0287866	0.0249212	0.0478963	0.62829	0.405	0.0338	4.40219e-33	-0.02627	0.020288	0.195371	Yes	Not assessed
1:154395747:G:A	rs147763778	IL6R.4139.71.2	COVID_C2	39	-0.0287866	0.0249212	0.0478963	0.62829	0.4284	0.0596	6.5786e-13	-0.022735	0.037237	0.541498	Yes	Not assessed
1:154420375:G:A	rs146389272	IL6R.4139.71.2	COVID_C2	39	-0.0287866	0.0249212	0.0478963	0.62829	0.4949	0.0697	1.24369e-12	0.023594	0.040397	0.559184	Yes	Not assessed
1:154421941:T:A	rs4601580	IL6R.4139.71.2	COVID_C2	39	-0.0287866	0.0249212	0.0478963	0.62829	0.3392	0.0259	3.44681e-39	0.009619	0.014823	0.516388	Yes	Not assessed
1:154430995:G:A	rs143318546	IL6R.4139.71.2	COVID_C2	39	-0.0287866	0.0249212	0.0478963	0.62829	-0.766	0.1438	9.99346e-08	0.15676	0.11742	0.181864	No	Not a missense variant or in LD with missense variants
1:154431149:G:A	rs540848324	IL6R.4139.71.2	COVID_C2	39	-0.0287866	0.0249212	0.0478963	0.62829	0.8297	0.1446	9.5859e-09	-0.099476	0.11193	0.374146	Yes	Not assessed
1:154431978:C:T	rs116037345	IL6R.4139.71.2	COVID_C2	39	-0.0287866	0.0249212	0.0478963	0.62829	-0.5764	0.0714	6.86877e-16	-0.056808	0.039211	0.1474	Yes	Not assessed
1:154436958:A:G	rs79778789	IL6R.4139.71.2	COVID_C2	39	-0.0287866	0.0249212	0.0478963	0.62829	0.7852	0.0887	8.57253e-19	-0.010044	0.054668	0.854227	Yes	Not assessed
1:154439292:G:A	rs76093405	IL6R.4139.71.2	COVID_C2	39	-0.0287866	0.0249212	0.0478963	0.62829	-0.7066	0.0775	7.69344e-20	-0.067726	0.046099	0.141794	Yes	Not assessed
1:154441428:G:A	rs114660934	IL6R.4139.71.2	COVID_C2	39	-0.0287866	0.0249212	0.0478963	0.62829	-0.4534	0.0592	1.87702e-14	0.042627	0.035035	0.223719	Yes	Not assessed
1:154443199:G:T	rs79219014	IL6R.4139.71.2	COVID_C2	39	-0.0287866	0.0249212	0.0478963	0.62829	0.7582	0.0767	4.82293e-23	-0.028099	0.045915	0.540552	Yes	Not assessed
1:154443202:A:G	rs558681060	IL6R.4139.71.2	COVID_C2	39	-0.0287866	0.0249212	0.0478963	0.62829	1.0061	0.1634	7.40037e-10	0.15656	0.12755	0.219657	No	Not a missense variant or in LD with missense variants
1:154443593:G:A	rs116141616	IL6R.4139.71.2	COVID_C2	39	-0.0287866	0.0249212	0.0478963	0.62829	-0.4498	0.0722	4.66683e-10	0.033828	0.041611	0.416242	Yes	Not assessed
1:154444329:C:T	rs139952834	IL6R.4139.71.2	COVID_C2	39	-0.0287866	0.0249212	0.0478963	0.62829	-0.6506	0.1072	1.28685e-09	0.057804	0.068287	0.397282	Yes	Not assessed
1:154447857:G:A	rs113580743	IL6R.4139.71.2	COVID_C2	39	-0.0287866	0.0249212	0.0478963	0.62829	-0.5141	0.0605	1.93683e-17	0.006471	0.03935	0.869379	Yes	Not assessed
1:154452980:G:A	rs12126142	IL6R.4139.71.2	COVID_C2	39	-0.0287866	0.0249212	0.0478963	0.62829	1.1104	0.0156	0	-0.036724	0.013229	0.00550284	Yes	Not assessed
1:154453714:G:A	rs12739228	IL6R.4139.71.2	COVID_C2	39	-0.0287866	0.0249212	0.0478963	0.62829	-0.6841	0.0647	3.9581e-26	-0.016866	0.037223	0.650472	Yes	Not assessed
1:154466204:G:A	rs35013949	IL6R.4139.71.2	COVID_C2	39	-0.0287866	0.0249212	0.0478963	0.62829	0.663	0.1285	2.47566e-07	-0.13683	0.077549	0.0776591	Yes	Not assessed
1:154467408:CTT:C	rs143915141	IL6R.4139.71.2	COVID_C2	39	-0.0287866	0.0249212	0.0478963	0.62829	-0.541	0.1218	8.92477e-06	0.075274	0.041642	0.0706616	Yes	Not assessed
1:154470538:C:T	rs79925547	IL6R.4139.71.2	COVID_C2	39	-0.0287866	0.0249212	0.0478963	0.62829	0.752	0.1155	7.47404e-11	0.052387	0.071202	0.461882	Yes	Not assessed
1:154497349:T:C	rs140615642	IL6R.4139.71.2	COVID_C2	39	-0.0287866	0.0249212	0.0478963	0.62829	0.5468	0.0836	6.12439e-11	0.0040122	0.063258	0.949427	Yes	Not assessed
1:154525677:T:C	rs75631461	IL6R.4139.71.2	COVID_C2	39	-0.0287866	0.0249212	0.0478963	0.62829	0.6628	0.0956	4.1185e-12	0.0098566	0.04809	0.837602	Yes	Not assessed
1:154529836:C:T	rs116710125	IL6R.4139.71.2	COVID_C2	39	-0.0287866	0.0249212	0.0478963	0.62829	-0.6158	0.0558	2.56635e-28	-0.029882	0.035055	0.393974	Yes	Not assessed
1:154536585:G:A	rs147830103	IL6R.4139.71.2	COVID_C2	39	-0.0287866	0.0249212	0.0478963	0.62829	-0.6467	0.084	1.3734e-14	-0.0091992	0.044831	0.837418	Yes	Not assessed
1:154543928:C:T	rs76289529	IL6R.4139.71.2	COVID_C2	39	-0.0287866	0.0249212	0.0478963	0.62829	0.6656	0.0678	9.50296e-23	0.065402	0.040398	0.10546	Yes	Not assessed
1:154558912:G:A	rs145464582	IL6R.4139.71.2	COVID_C2	39	-0.0287866	0.0249212	0.0478963	0.62829	0.7285	0.1006	4.43583e-13	-0.046232	0.069489	0.50585	Yes	Not assessed
1:154562004:C:T	rs149551556	IL6R.4139.71.2	COVID_C2	39	-0.0287866	0.0249212	0.0478963	0.62829	-0.6651	0.0947	2.16795e-12	0.025028	0.060008	0.676622	Yes	Not assessed
1:154569241:G:A	rs138398618	IL6R.4139.71.2	COVID_C2	39	-0.0287866	0.0249212	0.0478963	0.62829	-0.5044	0.1027	9.04319e-07	0.11439	0.065837	0.0823037	Yes	Not assessed
1:154577015:G:C	rs12125018	IL6R.4139.71.2	COVID_C2	39	-0.0287866	0.0249212	0.0478963	0.62829	0.556	0.1062	1.64624e-07	0.015952	0.064854	0.805707	Yes	Not assessed
1:154584187:G:A	rs1127311	IL6R.4139.71.2	COVID_C2	39	-0.0287866	0.0249212	0.0478963	0.62829	0.2543	0.0245	3.07085e-25	-0.0023558	0.013538	0.861855	Yes	Not assessed
1:154659152:ACTGCG:A	rs201012281	IL6R.4139.71.2	COVID_C2	39	-0.0287866	0.0249212	0.0478963	0.62829	0.7864	0.0884	5.79333e-19	-0.04559	0.067196	0.497478	Yes	Not assessed
1:154694215:G:A	rs6690912	IL6R.4139.71.2	COVID_C2	39	-0.0287866	0.0249212	0.0478963	0.62829	0.3835	0.0683	1.96637e-08	-0.046602	0.040541	0.250349	Yes	Not assessed
1:154710300:C:T	rs11264245	IL6R.4139.71.2	COVID_C2	39	-0.0287866	0.0249212	0.0478963	0.62829	0.4469	0.0548	3.48864e-16	-0.01367	0.031187	0.661152	Yes	Not assessed
1:154725148:C:G	rs141444337	IL6R.4139.71.2	COVID_C2	39	-0.0287866	0.0249212	0.0478963	0.62829	-0.4456	0.0637	2.6471e-12	-0.033631	0.041054	0.412678	Yes	Not assessed
1:154734827:G:A	rs72700223	IL6R.4139.71.2	COVID_C2	39	-0.0287866	0.0249212	0.0478963	0.62829	-0.234	0.052	6.79535e-06	-0.050207	0.026034	0.0537909	Yes	Not assessed
20:32730144:A:C	rs5022933	BPIFB1.11246.3.3	COVID_A1	12	0.71546	0.0647193	0.0437494	0.62829	-0.269	0.0603	8.15674e-06	-0.2255	0.45808	0.622527	Yes	Not assessed
20:32809452:GATTC:G	rs138092501	BPIFB1.11246.3.3	COVID_A1	12	0.71546	0.0647193	0.0437494	0.62829	-0.1264	0.0251	4.75717e-07	-0.10194	0.19013	0.591848	Yes	Not assessed
20:32993353:G:A	rs4911112	BPIFB1.11246.3.3	COVID_A1	12	0.71546	0.0647193	0.0437494	0.62829	0.1896	0.026	3.0469e-13	0.10905	0.15654	0.486036	Yes	Not assessed
20:33062113:A:G	rs383753	BPIFB1.11246.3.3	COVID_A1	12	0.71546	0.0647193	0.0437494	0.62829	-0.3535	0.0659	8.13141e-08	-0.071122	0.55545	0.898114	Yes	Not assessed
20:33062277:C:T	rs78868293	BPIFB1.11246.3.3	COVID_A1	12	0.71546	0.0647193	0.0437494	0.62829	-0.3688	0.0574	1.31794e-10	-0.14387	0.36507	0.693515	Yes	Not assessed
20:33085006:C:T	rs71349705	BPIFB1.11246.3.3	COVID_A1	12	0.71546	0.0647193	0.0437494	0.62829	-0.2757	0.059	2.97003e-06	-0.60663	0.31612	0.054986	Yes	Not assessed
20:33102295:G:A	rs138963020	BPIFB1.11246.3.3	COVID_A1	12	0.71546	0.0647193	0.0437494	0.62829	0.3482	0.0736	2.2344e-06	0.77567	0.50042	0.121132	Yes	Not assessed
20:33106254:C:T	rs2424961	BPIFB1.11246.3.3	COVID_A1	12	0.71546	0.0647193	0.0437494	0.62829	-0.4366	0.0245	4.90771e-71	-0.41467	0.14938	0.00550423	Yes	Not assessed
20:33109389:T:C	rs6088102	BPIFB1.11246.3.3	COVID_A1	12	0.71546	0.0647193	0.0437494	0.62829	-0.1841	0.0254	4.22872e-13	-0.16495	0.16033	0.303566	Yes	Not assessed
20:33144633:C:T	rs118129424	BPIFB1.11246.3.3	COVID_A1	12	0.71546	0.0647193	0.0437494	0.62829	-0.3524	0.0791	8.38462e-06	-0.42496	0.48222	0.378178	Yes	Not assessed
20:33168138:GCCA:G	rs11470590	BPIFB1.11246.3.3	COVID_A1	12	0.71546	0.0647193	0.0437494	0.62829	0.1255	0.0271	3.6391e-06	0.20253	0.19726	0.304554	Yes	Not assessed
20:33173147:T:G	rs76549422	BPIFB1.11246.3.3	COVID_A1	12	0.71546	0.0647193	0.0437494	0.62829	-0.4773	0.0729	5.85768e-11	0.2652	0.56318	0.637714	Yes	Not assessed
20:33290337:C:T	rs1884886	BPIFB1.11246.3.3	COVID_A1	12	0.71546	0.0647193	0.0437494	0.62829	0.2408	0.0336	7.68458e-13	-0.12397	0.20846	0.552048	Yes	Not assessed
20:33712865:G:A	rs34587839	BPIFB1.11246.3.3	COVID_A1	12	0.71546	0.0647193	0.0437494	0.62829	-0.1496	0.0335	7.9818e-06	0.0054501	0.19964	0.978221	Yes	Not assessed
1:11820684:A:T	rs145724263	NPPB.7655.11.3	COVID_C2	5	-0.105931	0.0433039	0.0144364	0.633139	0.254	0.0341	9.42785e-14	-0.013198	0.023722	0.577964	Yes	Not assessed
1:11837163:G:A	rs142864983	NPPB.7655.11.3	COVID_C2	5	-0.105931	0.0433039	0.0144364	0.633139	0.5395	0.1207	7.83075e-06	-0.074681	0.069708	0.284016	Yes	Not assessed
1:11859214:A:G	rs198389	NPPB.7655.11.3	COVID_C2	5	-0.105931	0.0433039	0.0144364	0.633139	0.2934	0.0253	4.27587e-31	-0.047642	0.015582	0.0022319	Yes	Not assessed
1:12015623:G:A	rs79893269	NPPB.7655.11.3	COVID_C2	5	-0.105931	0.0433039	0.0144364	0.633139	-0.3074	0.0539	1.17611e-08	-0.012196	0.030058	0.684927	Yes	Not assessed
1:12016480:A:T	rs71647026	NPPB.7655.11.3	COVID_C2	5	-0.105931	0.0433039	0.0144364	0.633139	0.1887	0.0426	9.44179e-06	-0.0037046	0.023404	0.874229	Yes	Not assessed
10:7541179:C:T	rs116379401	ITIH5.8233.2.3	COVID_C2	9	-0.0750759	0.0279045	0.0071355	0.633139	0.4252	0.0945	6.81228e-06	-0.14083	0.072733	0.0528359	Yes	Not assessed
10:7565335:C:A	rs10795552	ITIH5.8233.2.3	COVID_C2	9	-0.0750759	0.0279045	0.0071355	0.633139	-0.2354	0.029	4.769e-16	-0.0034388	0.018687	0.853997	Yes	Not assessed
10:7578818:C:T	rs7905962	ITIH5.8233.2.3	COVID_C2	9	-0.0750759	0.0279045	0.0071355	0.633139	0.1354	0.0254	9.78303e-08	0.0081254	0.019935	0.683571	Yes	Not assessed
10:7579912:T:G	rs36056263	ITIH5.8233.2.3	COVID_C2	9	-0.0750759	0.0279045	0.0071355	0.633139	-1.2753	0.132	4.39968e-22	0.05898	0.093268	0.527144	Yes	Not assessed
10:7580046:G:A	rs41298373	ITIH5.8233.2.3	COVID_C2	9	-0.0750759	0.0279045	0.0071355	0.633139	-0.4545	0.0417	1.16172e-27	0.018145	0.023565	0.441301	Yes	Not assessed
10:7606310:T:C	rs11255233	ITIH5.8233.2.3	COVID_C2	9	-0.0750759	0.0279045	0.0071355	0.633139	-0.2195	0.0288	2.50691e-14	0.052477	0.016185	0.0011856	Yes	Not assessed
10:7658746:A:G	rs7909223	ITIH5.8233.2.3	COVID_C2	9	-0.0750759	0.0279045	0.0071355	0.633139	0.3222	0.0286	1.9373e-29	-0.030778	0.014979	0.0399038	Yes	Not assessed
10:7660380:A:G	rs7094085	ITIH5.8233.2.3	COVID_C2	9	-0.0750759	0.0279045	0.0071355	0.633139	0.2504	0.0374	2.15396e-11	-0.012952	0.019252	0.501099	Yes	Not assessed
10:7674176:T:A	rs7896525	ITIH5.8233.2.3	COVID_C2	9	-0.0750759	0.0279045	0.0071355	0.633139	-0.124	0.0263	2.41914e-06	-0.0025597	0.016273	0.87501	Yes	Not assessed
20:14393927:A:G	rs6110271	FLRT3.13123.3.3	COVID_C2	7	0.0745093	0.0299747	0.0129283	0.633139	-0.2288	0.0342	2.23081e-11	0.016756	0.020947	0.423755	Yes	Not assessed
20:14544658:G:A	rs6135175	FLRT3.13123.3.3	COVID_C2	7	0.0745093	0.0299747	0.0129283	0.633139	-0.3458	0.0445	7.80003e-15	-0.022251	0.020367	0.274612	Yes	Not assessed
20:14708500:T:C	rs11908097	FLRT3.13123.3.3	COVID_C2	7	0.0745093	0.0299747	0.0129283	0.633139	0.4444	0.0278	1.60979e-57	0.033798	0.016523	0.0408044	Yes	Not assessed
20:14710923:C:T	rs73104513	FLRT3.13123.3.3	COVID_C2	7	0.0745093	0.0299747	0.0129283	0.633139	-0.3863	0.0382	4.85948e-24	-0.045638	0.0218	0.0363058	Yes	Not assessed
20:14714733:C:G	rs11087104	FLRT3.13123.3.3	COVID_C2	7	0.0745093	0.0299747	0.0129283	0.633139	-0.1449	0.0321	6.36106e-06	-0.016728	0.018434	0.364167	Yes	Not assessed
20:14768219:C:T	rs149195265	FLRT3.13123.3.3	COVID_C2	7	0.0745093	0.0299747	0.0129283	0.633139	0.4797	0.0996	1.4627e-06	-0.059684	0.07419	0.421123	Yes	Not assessed
20:14934935:G:T	rs73092191	FLRT3.13123.3.3	COVID_C2	7	0.0745093	0.0299747	0.0129283	0.633139	-0.2324	0.0339	7.10848e-12	-0.046384	0.020425	0.0231505	Yes	Not assessed
12:6971024:C:G	rs11064480	C1RL.9348.1.3	COVID_A1	10	0.668433	0.340287	0.0494925	0.636947	-0.4553	0.0626	3.51166e-13	-0.59545	0.34706	0.0862174	Yes	Not assessed
12:7048879:A:G	rs188925382	C1RL.9348.1.3	COVID_A1	10	0.668433	0.340287	0.0494925	0.636947	-0.4428	0.0757	4.93333e-09	-0.19272	0.6777	0.776124	Yes	Not assessed
12:7094560:T:C	rs3168379	C1RL.9348.1.3	COVID_A1	10	0.668433	0.340287	0.0494925	0.636947	-0.2848	0.0408	2.94357e-12	-0.40636	0.35332	0.250095	Yes	Not assessed
12:7097267:A:G	rs11613834	C1RL.9348.1.3	COVID_A1	10	0.668433	0.340287	0.0494925	0.636947	-0.3247	0.0255	3.86001e-37	-0.14269	0.16692	0.392639	Yes	Not assessed
12:7100001:G:A	rs61917913	C1RL.9348.1.3	COVID_A1	10	0.668433	0.340287	0.0494925	0.636947	-0.4478	0.0575	6.81719e-15	-0.23575	0.50598	0.641267	Yes	Not assessed
12:7111611:A:C	rs4013723	C1RL.9348.1.3	COVID_A1	10	0.668433	0.340287	0.0494925	0.636947	-0.2807	0.0472	2.73045e-09	0.24799	0.27895	0.373996	Yes	Not assessed
12:7186755:A:C	rs77007122	C1RL.9348.1.3	COVID_A1	10	0.668433	0.340287	0.0494925	0.636947	-1.0601	0.083	2.34165e-37	-0.93001	0.69246	0.179255	Yes	Not assessed
12:7206088:C:T	rs10161542	C1RL.9348.1.3	COVID_A1	10	0.668433	0.340287	0.0494925	0.636947	-0.1228	0.0273	6.85414e-06	-0.17077	0.17688	0.334316	Yes	Not assessed
12:7238195:A:C	rs77834629	C1RL.9348.1.3	COVID_A1	10	0.668433	0.340287	0.0494925	0.636947	-0.2849	0.0556	2.98961e-07	-0.23077	0.36362	0.525659	Yes	Not assessed
12:7265153:C:T	rs73055887	C1RL.9348.1.3	COVID_A1	10	0.668433	0.340287	0.0494925	0.636947	-0.4083	0.087	2.69091e-06	-0.3698	0.47344	0.434749	Yes	Not assessed
17:57966635:A:G	rs6503842	MPO.2580.83.2	COVID_D1	6	-0.175197	0.0807804	0.0300978	0.645988	-0.1409	0.0302	3.07773e-06	0.041209	0.034711	0.235148	Yes	Not assessed
17:58268002:C:T	rs8178414	MPO.2580.83.2	COVID_D1	6	-0.175197	0.0807804	0.0300978	0.645988	-0.4972	0.1107	7.07505e-06	0.15918	0.11088	0.151114	Yes	Not assessed
17:58273136:A:T	rs35400724	MPO.2580.83.2	COVID_D1	6	-0.175197	0.0807804	0.0300978	0.645988	-0.2185	0.0482	5.80981e-06	0.092018	0.046156	0.0461925	Yes	Not assessed
17:58281068:C:T	rs34097845	MPO.2580.83.2	COVID_D1	6	-0.175197	0.0807804	0.0300978	0.645988	-0.5736	0.0497	8.17312e-31	0.080502	0.07705	0.296114	Yes	Not assessed
17:58316272:T:C	rs2526381	MPO.2580.83.2	COVID_D1	6	-0.175197	0.0807804	0.0300978	0.645988	0.2633	0.033	1.47777e-15	-0.023038	0.036539	0.528365	Yes	Not assessed
17:59050421:A:T	rs191529281	MPO.2580.83.2	COVID_D1	6	-0.175197	0.0807804	0.0300978	0.645988	-1.3372	0.1569	1.55976e-17	-0.11079	0.34644	0.749123	No	Not a missense variant or in LD with missense variants
11:60788825:C:A	rs7123684	TMEM132A.7871.16.3	COVID_D1	10	0.0986407	0.0481964	0.0406933	0.645988	-0.2127	0.029	2.22579e-13	-0.02242	0.03482	0.519651	Yes	Not assessed
11:60868266:C:T	rs56291461	TMEM132A.7871.16.3	COVID_D1	10	0.0986407	0.0481964	0.0406933	0.645988	-0.4861	0.0913	1.01395e-07	-0.13367	0.10039	0.183022	Yes	Not assessed
11:60931260:G:A	rs11230521	TMEM132A.7871.16.3	COVID_D1	10	0.0986407	0.0481964	0.0406933	0.645988	0.6176	0.0274	1.67765e-112	0.075657	0.034668	0.0290852	Yes	Not assessed
11:60955538:G:A	rs541591	TMEM132A.7871.16.3	COVID_D1	10	0.0986407	0.0481964	0.0406933	0.645988	-1.1623	0.085	1.44955e-42	-0.017829	0.11296	0.874587	Yes	Not assessed
11:60955950:A:G	rs72918838	TMEM132A.7871.16.3	COVID_D1	10	0.0986407	0.0481964	0.0406933	0.645988	-0.1762	0.0263	2.08963e-11	-0.040124	0.031841	0.20762	Yes	Not assessed
11:60993435:C:T	rs11230554	TMEM132A.7871.16.3	COVID_D1	10	0.0986407	0.0481964	0.0406933	0.645988	0.2744	0.0523	1.54886e-07	0.015121	0.061409	0.805501	Yes	Not assessed
11:61015636:C:T	rs2074229	TMEM132A.7871.16.3	COVID_D1	10	0.0986407	0.0481964	0.0406933	0.645988	0.1781	0.0247	5.5736e-13	-0.010966	0.02926	0.707826	Yes	Not assessed
11:61045866:C:T	rs111543883	TMEM132A.7871.16.3	COVID_D1	10	0.0986407	0.0481964	0.0406933	0.645988	0.4188	0.0814	2.67573e-07	0.12605	0.11346	0.266584	Yes	Not assessed
11:61060461:C:T	rs11230581	TMEM132A.7871.16.3	COVID_D1	10	0.0986407	0.0481964	0.0406933	0.645988	0.1212	0.0257	2.40582e-06	-0.0065398	0.030458	0.829989	Yes	Not assessed
11:61119047:T:C	rs79811054	TMEM132A.7871.16.3	COVID_D1	10	0.0986407	0.0481964	0.0406933	0.645988	0.2322	0.041	1.4839e-08	-0.013209	0.050796	0.794833	Yes	Not assessed
20:55201293:T:G	rs2148697	CBLN4.5688.65.3	COVID_D1	5	-0.245531	0.0866564	0.00460584	0.645988	0.1174	0.0257	4.92181e-06	-0.052064	0.02738	0.0572321	Yes	Not assessed
20:55561623:C:G	rs6069316	CBLN4.5688.65.3	COVID_D1	5	-0.245531	0.0866564	0.00460584	0.645988	-0.1866	0.0289	1.06977e-10	0.01155	0.032292	0.720587	Yes	Not assessed
20:55694664:C:T	rs4811612	CBLN4.5688.65.3	COVID_D1	5	-0.245531	0.0866564	0.00460584	0.645988	0.1546	0.0256	1.55012e-09	-0.084546	0.028155	0.00267441	Yes	Not assessed
20:55872891:C:T	rs74447607	CBLN4.5688.65.3	COVID_D1	5	-0.245531	0.0866564	0.00460584	0.645988	-0.2177	0.0312	3.00342e-12	0.043251	0.034236	0.206474	Yes	Not assessed
20:56178849:G:A	rs2870717	CBLN4.5688.65.3	COVID_D1	5	-0.245531	0.0866564	0.00460584	0.645988	-0.1217	0.0258	2.39284e-06	-0.0040404	0.028285	0.886412	Yes	Not assessed
16:48599248:A:G	rs77479887	CBLN1.9313.27.3	COVID_D1	20	-0.0718081	0.0352374	0.0415662	0.645988	-0.7911	0.104	2.81116e-14	-0.33844	0.16233	0.0370794	Yes	Not assessed
16:48692752:C:A	rs72788431	CBLN1.9313.27.3	COVID_D1	20	-0.0718081	0.0352374	0.0415662	0.645988	-0.1732	0.0362	1.71388e-06	0.04645	0.041495	0.262964	Yes	Not assessed
16:48794762:C:T	rs141202826	CBLN1.9313.27.3	COVID_D1	20	-0.0718081	0.0352374	0.0415662	0.645988	-1.1366	0.1618	2.14493e-12	0.49324	0.27475	0.0726167	No	Not a missense variant or in LD with missense variants
16:48867187:C:T	rs144822478	CBLN1.9313.27.3	COVID_D1	20	-0.0718081	0.0352374	0.0415662	0.645988	-0.5632	0.1083	1.98893e-07	0.072436	0.13856	0.601129	Yes	Not assessed
16:48872126:C:T	rs118051363	CBLN1.9313.27.3	COVID_D1	20	-0.0718081	0.0352374	0.0415662	0.645988	-0.8067	0.1305	6.34514e-10	0.109	0.17621	0.536193	Yes	Not assessed
16:48872176:C:T	rs112130821	CBLN1.9313.27.3	COVID_D1	20	-0.0718081	0.0352374	0.0415662	0.645988	-0.9688	0.1406	5.56086e-12	-0.034245	0.17799	0.84743	Yes	Not assessed
16:48890317:A:G	rs116946931	CBLN1.9313.27.3	COVID_D1	20	-0.0718081	0.0352374	0.0415662	0.645988	-0.8865	0.1294	7.34124e-12	0.31913	0.14716	0.0301137	Yes	Not assessed
16:48909130:A:G	rs73551389	CBLN1.9313.27.3	COVID_D1	20	-0.0718081	0.0352374	0.0415662	0.645988	0.2562	0.0453	1.55276e-08	0.021535	0.050197	0.667916	Yes	Not assessed
16:48929129:T:G	rs2160488	CBLN1.9313.27.3	COVID_D1	20	-0.0718081	0.0352374	0.0415662	0.645988	-0.1734	0.0251	4.90266e-12	0.059517	0.026779	0.0262478	Yes	Not assessed
16:48967998:C:T	rs62031961	CBLN1.9313.27.3	COVID_D1	20	-0.0718081	0.0352374	0.0415662	0.645988	-0.7699	0.1057	3.24493e-13	0.095223	0.13361	0.476035	Yes	Not assessed
16:48972547:T:A	rs10852587	CBLN1.9313.27.3	COVID_D1	20	-0.0718081	0.0352374	0.0415662	0.645988	-1.0805	0.0327	1.97302e-239	0.069927	0.041266	0.0901622	Yes	Not assessed
16:48977338:G:A	rs6500208	CBLN1.9313.27.3	COVID_D1	20	-0.0718081	0.0352374	0.0415662	0.645988	0.1602	0.0308	1.97901e-07	0.0022081	0.033543	0.947514	Yes	Not assessed
16:48980288:A:AC	rs5816611	CBLN1.9313.27.3	COVID_D1	20	-0.0718081	0.0352374	0.0415662	0.645988	-0.2404	0.0279	6.90394e-18	0.015679	0.0549	0.775191	Yes	Not assessed
16:48984013:C:T	rs147398563	CBLN1.9313.27.3	COVID_D1	20	-0.0718081	0.0352374	0.0415662	0.645988	-0.666	0.1428	3.10324e-06	-0.09656	0.27793	0.728272	No	Not a missense variant or in LD with missense variants
16:49019402:T:C	rs117162243	CBLN1.9313.27.3	COVID_D1	20	-0.0718081	0.0352374	0.0415662	0.645988	0.6858	0.1125	1.08755e-09	-0.12708	0.14508	0.381068	Yes	Not assessed
16:49019551:G:T	rs6500209	CBLN1.9313.27.3	COVID_D1	20	-0.0718081	0.0352374	0.0415662	0.645988	-0.1335	0.0275	1.20663e-06	0.054729	0.038576	0.155977	Yes	Not assessed
16:49054591:A:G	rs143653516	CBLN1.9313.27.3	COVID_D1	20	-0.0718081	0.0352374	0.0415662	0.645988	-0.7	0.1073	6.8564e-11	0.10321	0.15173	0.496364	Yes	Not assessed
16:49084473:T:C	rs185056273	CBLN1.9313.27.3	COVID_D1	20	-0.0718081	0.0352374	0.0415662	0.645988	0.583	0.0996	4.81584e-09	-0.089027	0.10851	0.41196	Yes	Not assessed
16:49290828:T:G	rs41214	CBLN1.9313.27.3	COVID_D1	20	-0.0718081	0.0352374	0.0415662	0.645988	-0.1707	0.0283	1.62141e-09	0.026192	0.029324	0.371754	Yes	Not assessed
16:49335051:T:C	rs12597189	CBLN1.9313.27.3	COVID_D1	20	-0.0718081	0.0352374	0.0415662	0.645988	-0.2717	0.0485	2.11817e-08	-0.022355	0.057697	0.698419	Yes	Not assessed
5:149953433:C:T	rs245064	PDGFRB.3459.49.2	COVID_D1	26	0.059579	0.028505	0.0366064	0.645988	-0.1185	0.0252	2.57145e-06	-0.037685	0.026872	0.160799	Yes	Not assessed
5:149998127:TCAAA:T	rs140461335	PDGFRB.3459.49.2	COVID_D1	26	0.059579	0.028505	0.0366064	0.645988	-0.2661	0.0387	6.15699e-12	0.088077	0.062982	0.161979	Yes	Not assessed
5:150056045:G:C	rs56327604	PDGFRB.3459.49.2	COVID_D1	26	0.059579	0.028505	0.0366064	0.645988	-0.4148	0.0652	1.99191e-10	-0.0053116	0.072971	0.941973	Yes	Not assessed
5:150066032:A:G	rs216145	PDGFRB.3459.49.2	COVID_D1	26	0.059579	0.028505	0.0366064	0.645988	-0.2572	0.028	4.08805e-20	-0.037836	0.031214	0.225456	Yes	Not assessed
5:150085686:G:A	rs2237085	PDGFRB.3459.49.2	COVID_D1	26	0.059579	0.028505	0.0366064	0.645988	-0.2735	0.0294	1.36896e-20	-0.047573	0.03392	0.160764	Yes	Not assessed
5:150091737:T:C	rs79459330	PDGFRB.3459.49.2	COVID_D1	26	0.059579	0.028505	0.0366064	0.645988	0.2624	0.0403	7.45696e-11	0.007888	0.049472	0.873319	Yes	Not assessed
5:150110414:G:A	rs12153782	PDGFRB.3459.49.2	COVID_D1	26	0.059579	0.028505	0.0366064	0.645988	0.5175	0.0847	9.97565e-10	0.17939	0.11861	0.130423	Yes	Not assessed
5:150112084:A:G	rs115138219	PDGFRB.3459.49.2	COVID_D1	26	0.059579	0.028505	0.0366064	0.645988	0.4571	0.077	2.91413e-09	-0.017714	0.1008	0.860503	Yes	Not assessed
5:150119258:C:T	rs3733676	PDGFRB.3459.49.2	COVID_D1	26	0.059579	0.028505	0.0366064	0.645988	-0.5734	0.0618	1.72176e-20	-0.1696	0.072245	0.0188965	Yes	Not assessed
5:150123275:G:C	rs56388645	PDGFRB.3459.49.2	COVID_D1	26	0.059579	0.028505	0.0366064	0.645988	-0.5693	0.0911	4.12622e-10	-0.12966	0.090829	0.153431	Yes	Not assessed
5:150124785:C:T	rs56072663	PDGFRB.3459.49.2	COVID_D1	26	0.059579	0.028505	0.0366064	0.645988	-0.562	0.0703	1.30301e-15	-0.060475	0.07725	0.433716	Yes	Not assessed
5:150125301:T:C	rs112374268	PDGFRB.3459.49.2	COVID_D1	26	0.059579	0.028505	0.0366064	0.645988	-0.514	0.0765	1.83033e-11	-0.23262	0.079803	0.00355771	Yes	Not assessed
5:150128981:C:G	rs2304058	PDGFRB.3459.49.2	COVID_D1	26	0.059579	0.028505	0.0366064	0.645988	0.9308	0.0203	0	0.054396	0.026845	0.0427341	Yes	Not assessed
5:150132844:G:A	rs2229558	PDGFRB.3459.49.2	COVID_D1	26	0.059579	0.028505	0.0366064	0.645988	-0.7527	0.093	5.79513e-16	0.17019	0.12158	0.161568	Yes	Not assessed
5:150133048:A:G	rs55670260	PDGFRB.3459.49.2	COVID_D1	26	0.059579	0.028505	0.0366064	0.645988	-0.5584	0.0843	3.49697e-11	-0.1106	0.089262	0.215327	Yes	Not assessed
5:150133218:G:A	rs73796324	PDGFRB.3459.49.2	COVID_D1	26	0.059579	0.028505	0.0366064	0.645988	-0.8349	0.1571	1.0698e-07	0.13954	0.17099	0.414459	Yes	Not assessed
5:150135395:T:G	rs758589	PDGFRB.3459.49.2	COVID_D1	26	0.059579	0.028505	0.0366064	0.645988	0.4697	0.1004	2.89282e-06	0.18286	0.16643	0.27189	Yes	Not assessed
5:150138942:C:T	rs17110948	PDGFRB.3459.49.2	COVID_D1	26	0.059579	0.028505	0.0366064	0.645988	0.2807	0.0531	1.24848e-07	0.040751	0.058021	0.482461	Yes	Not assessed
5:150139960:C:T	rs111884151	PDGFRB.3459.49.2	COVID_D1	26	0.059579	0.028505	0.0366064	0.645988	0.3272	0.064	3.17923e-07	0.013613	0.075755	0.85739	Yes	Not assessed
5:150147510:C:A	rs115670940	PDGFRB.3459.49.2	COVID_D1	26	0.059579	0.028505	0.0366064	0.645988	0.3926	0.0713	3.6643e-08	-0.14348	0.0767	0.0613915	Yes	Not assessed
5:150148335:C:T	rs139009243	PDGFRB.3459.49.2	COVID_D1	26	0.059579	0.028505	0.0366064	0.645988	0.5895	0.0798	1.49933e-13	0.13747	0.10025	0.17029	Yes	Not assessed
5:150152786:T:C	rs188825016	PDGFRB.3459.49.2	COVID_D1	26	0.059579	0.028505	0.0366064	0.645988	-0.6998	0.1091	1.41472e-10	0.08409	0.13242	0.525412	Yes	Not assessed
5:150193386:C:G	rs917585	PDGFRB.3459.49.2	COVID_D1	26	0.059579	0.028505	0.0366064	0.645988	-0.2005	0.0247	4.76242e-16	0.042331	0.02652	0.110446	Yes	Not assessed
5:150206806:G:T	rs12652602	PDGFRB.3459.49.2	COVID_D1	26	0.059579	0.028505	0.0366064	0.645988	0.1352	0.0282	1.63222e-06	-0.026863	0.030751	0.382355	Yes	Not assessed
5:150225114:A:T	rs72837588	PDGFRB.3459.49.2	COVID_D1	26	0.059579	0.028505	0.0366064	0.645988	-0.3179	0.0544	5.10386e-09	-0.086617	0.076032	0.254612	Yes	Not assessed
5:150270190:G:A	rs4958443	PDGFRB.3459.49.2	COVID_D1	26	0.059579	0.028505	0.0366064	0.645988	-0.2249	0.0449	5.47395e-07	-0.10437	0.04785	0.0291693	Yes	Not assessed
2:150906530:C:T	rs116667811	TNFAIP6.5036.50.1	COVID_D1	15	0.109338	0.0441186	0.013202	0.645988	0.4143	0.0724	1.05045e-08	0.096995	0.077981	0.213563	Yes	Not assessed
2:150976094:C:T	rs6433094	TNFAIP6.5036.50.1	COVID_D1	15	0.109338	0.0441186	0.013202	0.645988	-0.1327	0.0261	3.69001e-07	-0.0016368	0.027717	0.952909	Yes	Not assessed
2:151193094:A:G	rs289880	TNFAIP6.5036.50.1	COVID_D1	15	0.109338	0.0441186	0.013202	0.645988	0.3053	0.056	4.98665e-08	6.3434e-05	0.065558	0.999228	Yes	Not assessed
2:151217491:A:G	rs114838449	TNFAIP6.5036.50.1	COVID_D1	15	0.109338	0.0441186	0.013202	0.645988	0.3482	0.0746	3.04797e-06	0.017154	0.070405	0.807504	Yes	Not assessed
2:151229488:T:C	rs115545121	TNFAIP6.5036.50.1	COVID_D1	15	0.109338	0.0441186	0.013202	0.645988	0.7451	0.1075	4.17395e-12	0.081266	0.12188	0.504919	Yes	Not assessed
2:151256107:GC:G	rs200153724	TNFAIP6.5036.50.1	COVID_D1	15	0.109338	0.0441186	0.013202	0.645988	0.3957	0.0778	3.65466e-07	0.096231	0.16252	0.553772	Yes	Not assessed
2:151280667:C:T	rs289828	TNFAIP6.5036.50.1	COVID_D1	15	0.109338	0.0441186	0.013202	0.645988	-0.5479	0.0237	3.04193e-118	-0.059675	0.026869	0.0263536	Yes	Not assessed
2:151312215:G:C	rs149814201	TNFAIP6.5036.50.1	COVID_D1	15	0.109338	0.0441186	0.013202	0.645988	0.5106	0.0769	3.14126e-11	-0.01344	0.090394	0.881804	Yes	Not assessed
2:151347901:T:C	rs4664371	TNFAIP6.5036.50.1	COVID_D1	15	0.109338	0.0441186	0.013202	0.645988	0.1754	0.0306	9.9238e-09	0.049461	0.032942	0.133237	Yes	Not assessed
2:151352489:T:G	rs189411855	TNFAIP6.5036.50.1	COVID_D1	15	0.109338	0.0441186	0.013202	0.645988	0.4273	0.0965	9.512e-06	0.011297	0.14837	0.939307	Yes	Not assessed
2:151367866:A:T	rs7560143	TNFAIP6.5036.50.1	COVID_D1	15	0.109338	0.0441186	0.013202	0.645988	-0.3657	0.0348	7.88381e-26	-0.062945	0.037449	0.092798	Yes	Not assessed
2:151552119:T:C	rs146484052	TNFAIP6.5036.50.1	COVID_D1	15	0.109338	0.0441186	0.013202	0.645988	0.4437	0.076	5.27811e-09	0.10897	0.087971	0.215455	Yes	Not assessed
2:151618125:T:G	rs113766142	TNFAIP6.5036.50.1	COVID_D1	15	0.109338	0.0441186	0.013202	0.645988	-0.3137	0.0701	7.63986e-06	0.12241	0.082898	0.139774	Yes	Not assessed
2:151718132:C:T	rs145934092	TNFAIP6.5036.50.1	COVID_D1	15	0.109338	0.0441186	0.013202	0.645988	-0.2311	0.0486	1.98305e-06	0.0056137	0.054197	0.917503	Yes	Not assessed
2:152191402:T:TA	rs35437315	TNFAIP6.5036.50.1	COVID_D1	15	0.109338	0.0441186	0.013202	0.645988	0.5753	0.1154	6.18758e-07	0.50032	0.18094	0.00569026	Yes	Not assessed
4:1002470:C:T	rs201682298	IDUA.3169.70.2	COVID_D1	20	-0.0776782	0.0361727	0.0317595	0.645988	1.0232	0.0835	1.60122e-34	-0.37856	0.13887	0.00641065	Yes	Not assessed
4:1012984:A:G	rs13143527	IDUA.3169.70.2	COVID_D1	20	-0.0776782	0.0361727	0.0317595	0.645988	-0.2601	0.0258	6.67711e-24	0.00051755	0.028484	0.985503	Yes	Not assessed
4:1016990:T:C	rs55916145	IDUA.3169.70.2	COVID_D1	20	-0.0776782	0.0361727	0.0317595	0.645988	0.4189	0.0243	1.36102e-66	-0.042739	0.027204	0.11617	Yes	Not assessed
4:1029564:C:T	rs77143521	IDUA.3169.70.2	COVID_D1	20	-0.0776782	0.0361727	0.0317595	0.645988	-0.5525	0.0749	1.62502e-13	-0.024983	0.090738	0.783062	Yes	Not assessed
4:1119469:G:A	rs1904931	IDUA.3169.70.2	COVID_D1	20	-0.0776782	0.0361727	0.0317595	0.645988	-0.2559	0.0555	4.01101e-06	-0.095833	0.069589	0.168473	Yes	Not assessed
4:1171342:G:T	rs11247975	IDUA.3169.70.2	COVID_D1	20	-0.0776782	0.0361727	0.0317595	0.645988	-0.1459	0.0267	4.64424e-08	0.022838	0.028357	0.420604	Yes	Not assessed
4:1417598:C:T	rs13146372	IDUA.3169.70.2	COVID_D1	20	-0.0776782	0.0361727	0.0317595	0.645988	-0.1357	0.026	1.79668e-07	-0.028859	0.02897	0.319168	Yes	Not assessed
4:714354:T:C	rs73221108	IDUA.3169.70.2	COVID_D1	20	-0.0776782	0.0361727	0.0317595	0.645988	-0.5847	0.0659	7.14999e-19	-0.086369	0.090754	0.341258	Yes	Not assessed
4:793534:G:A	rs115071561	IDUA.3169.70.2	COVID_D1	20	-0.0776782	0.0361727	0.0317595	0.645988	0.4981	0.0565	1.18696e-18	-0.0093646	0.064111	0.883867	Yes	Not assessed
4:800972:G:A	rs34951963	IDUA.3169.70.2	COVID_D1	20	-0.0776782	0.0361727	0.0317595	0.645988	0.5686	0.0901	2.77658e-10	0.10372	0.096513	0.282521	Yes	Not assessed
4:857451:T:C	rs193280704	IDUA.3169.70.2	COVID_D1	20	-0.0776782	0.0361727	0.0317595	0.645988	1.1238	0.2031	3.14378e-08	-0.28191	0.20551	0.170139	Yes	Not assessed
4:884260:C:T	rs899387	IDUA.3169.70.2	COVID_D1	20	-0.0776782	0.0361727	0.0317595	0.645988	-0.1382	0.0285	1.24009e-06	-0.0016308	0.029715	0.956233	Yes	Not assessed
4:902313:A:C	rs115384752	IDUA.3169.70.2	COVID_D1	20	-0.0776782	0.0361727	0.0317595	0.645988	-0.426	0.0908	2.71037e-06	0.13569	0.13678	0.321182	Yes	Not assessed
4:921439:G:A	rs76899536	IDUA.3169.70.2	COVID_D1	20	-0.0776782	0.0361727	0.0317595	0.645988	0.5586	0.0657	1.85898e-17	-0.14518	0.059869	0.01531	Yes	Not assessed
4:944757:G:A	rs147280206	IDUA.3169.70.2	COVID_D1	20	-0.0776782	0.0361727	0.0317595	0.645988	0.4645	0.1006	3.88772e-06	-0.13497	0.1715	0.431284	Yes	Not assessed
4:947143:T:C	rs140892583	IDUA.3169.70.2	COVID_D1	20	-0.0776782	0.0361727	0.0317595	0.645988	-0.554	0.0843	4.97215e-11	0.25844	0.11522	0.024896	Yes	Not assessed
4:964712:G:A	rs149329010	IDUA.3169.70.2	COVID_D1	20	-0.0776782	0.0361727	0.0317595	0.645988	-0.5056	0.102	7.16405e-07	-0.056679	0.11953	0.63537	Yes	Not assessed
4:987896:C:G	rs148775298	IDUA.3169.70.2	COVID_D1	20	-0.0776782	0.0361727	0.0317595	0.645988	-1.2357	0.1469	4.03612e-17	0.13976	0.22225	0.529453	No	Not a missense variant or in LD with missense variants
4:987956:G:A	rs200911718	IDUA.3169.70.2	COVID_D1	20	-0.0776782	0.0361727	0.0317595	0.645988	0.9707	0.155	3.78658e-10	-0.61871	0.27409	0.0239878	No	Not a missense variant or in LD with missense variants
4:991939:A:G	rs3822020	IDUA.3169.70.2	COVID_D1	20	-0.0776782	0.0361727	0.0317595	0.645988	0.608	0.0235	1.36418e-147	-0.012174	0.027889	0.662462	Yes	Not assessed
1:202971485:T:G	rs7553960	CHI3L1.11104.13.3	COVID_D1	33	-0.0488916	0.0241571	0.0429802	0.645988	-0.2852	0.0613	3.27889e-06	-0.097298	0.07245	0.179282	Yes	Not assessed
1:203048035:G:A	rs754893	CHI3L1.11104.13.3	COVID_D1	33	-0.0488916	0.0241571	0.0429802	0.645988	-0.2614	0.0496	1.36304e-07	-0.026888	0.061224	0.660535	Yes	Not assessed
1:203074051:T:G	rs66681392	CHI3L1.11104.13.3	COVID_D1	33	-0.0488916	0.0241571	0.0429802	0.645988	0.2138	0.0345	5.75124e-10	-0.019273	0.038056	0.612549	Yes	Not assessed
1:203082926:T:G	rs61821092	CHI3L1.11104.13.3	COVID_D1	33	-0.0488916	0.0241571	0.0429802	0.645988	0.2742	0.0406	1.44127e-11	0.019117	0.052216	0.71428	Yes	Not assessed
1:203096787:G:A	rs115867608	CHI3L1.11104.13.3	COVID_D1	33	-0.0488916	0.0241571	0.0429802	0.645988	0.9755	0.1217	1.0959e-15	-0.12413	0.17913	0.488334	No	Not a missense variant or in LD with missense variants
1:203131170:C:A	rs12135643	CHI3L1.11104.13.3	COVID_D1	33	-0.0488916	0.0241571	0.0429802	0.645988	-0.2835	0.0322	1.31616e-18	0.036162	0.033345	0.278152	Yes	Not assessed
1:203142176:A:G	rs10800901	CHI3L1.11104.13.3	COVID_D1	33	-0.0488916	0.0241571	0.0429802	0.645988	-0.1349	0.0278	1.21904e-06	-0.012885	0.02997	0.667247	Yes	Not assessed
1:203146364:C:T	rs189025316	CHI3L1.11104.13.3	COVID_D1	33	-0.0488916	0.0241571	0.0429802	0.645988	0.8263	0.161	2.86226e-07	-0.077865	0.25752	0.762374	No	Not a missense variant or in LD with missense variants
1:203154709:T:C	rs4423076	CHI3L1.11104.13.3	COVID_D1	33	-0.0488916	0.0241571	0.0429802	0.645988	0.2628	0.0378	3.59172e-12	-0.080979	0.041694	0.0521102	Yes	Not assessed
1:203160386:C:T	rs138319404	CHI3L1.11104.13.3	COVID_D1	33	-0.0488916	0.0241571	0.0429802	0.645988	1.0283	0.1219	3.295e-17	0.078207	0.1484	0.598193	Yes	Not assessed
1:203167497:G:A	rs72739545	CHI3L1.11104.13.3	COVID_D1	33	-0.0488916	0.0241571	0.0429802	0.645988	0.9153	0.1355	1.42853e-11	-0.25872	0.15023	0.0850407	Yes	Not assessed
1:203177038:C:G	rs883125	CHI3L1.11104.13.3	COVID_D1	33	-0.0488916	0.0241571	0.0429802	0.645988	0.5388	0.0326	2.32179e-61	0.0145	0.037598	0.699749	Yes	Not assessed
1:203177458:A:G	rs2364572	CHI3L1.11104.13.3	COVID_D1	33	-0.0488916	0.0241571	0.0429802	0.645988	-0.4822	0.0711	1.18526e-11	-0.090075	0.093948	0.337672	Yes	Not assessed
1:203178297:G:T	rs143089140	CHI3L1.11104.13.3	COVID_D1	33	-0.0488916	0.0241571	0.0429802	0.645988	0.9368	0.1768	1.16667e-07	-0.12227	0.20934	0.559171	Yes	Not assessed
1:203181771:C:G	rs35405821	CHI3L1.11104.13.3	COVID_D1	33	-0.0488916	0.0241571	0.0429802	0.645988	-1.0287	0.0176	0	0.050858	0.026382	0.0538858	Yes	Not assessed
1:203182666:G:C	rs12409713	CHI3L1.11104.13.3	COVID_D1	33	-0.0488916	0.0241571	0.0429802	0.645988	0.5205	0.0977	9.95556e-08	0.05935	0.12073	0.623007	Yes	Not assessed
1:203183958:C:T	rs142982301	CHI3L1.11104.13.3	COVID_D1	33	-0.0488916	0.0241571	0.0429802	0.645988	0.8774	0.167	1.48918e-07	-0.25198	0.20754	0.224699	No	Not a missense variant or in LD with missense variants
1:203187533:A:C	rs140716503	CHI3L1.11104.13.3	COVID_D1	33	-0.0488916	0.0241571	0.0429802	0.645988	0.9527	0.1302	2.5319e-13	0.14473	0.1808	0.423422	Yes	Not assessed
1:203189114:C:T	rs116415868	CHI3L1.11104.13.3	COVID_D1	33	-0.0488916	0.0241571	0.0429802	0.645988	-0.6411	0.1211	1.19688e-07	-0.29129	0.16788	0.0827216	No	Not a missense variant or in LD with missense variants
1:203190788:G:A	rs76492247	CHI3L1.11104.13.3	COVID_D1	33	-0.0488916	0.0241571	0.0429802	0.645988	-0.45	0.0604	9.31062e-14	-0.060996	0.087319	0.484838	Yes	Not assessed
1:203192233:G:A	rs4950930	CHI3L1.11104.13.3	COVID_D1	33	-0.0488916	0.0241571	0.0429802	0.645988	-0.3911	0.0601	7.64181e-11	0.072572	0.067773	0.284255	Yes	Not assessed
1:203193153:G:A	rs72739564	CHI3L1.11104.13.3	COVID_D1	33	-0.0488916	0.0241571	0.0429802	0.645988	-0.3749	0.0616	1.15738e-09	0.045109	0.074255	0.543527	Yes	Not assessed
1:203195038:C:T	rs149559227	CHI3L1.11104.13.3	COVID_D1	33	-0.0488916	0.0241571	0.0429802	0.645988	-0.7054	0.1509	2.945e-06	-0.21364	0.15179	0.159288	Yes	Not assessed
1:203212165:G:A	rs138430675	CHI3L1.11104.13.3	COVID_D1	33	-0.0488916	0.0241571	0.0429802	0.645988	0.8961	0.1284	2.97348e-12	-0.037293	0.16885	0.825198	Yes	Not assessed
1:203217538:C:G	rs41308417	CHI3L1.11104.13.3	COVID_D1	33	-0.0488916	0.0241571	0.0429802	0.645988	-0.4236	0.0734	7.87477e-09	-0.031817	0.096067	0.740496	Yes	Not assessed
1:203220506:A:G	rs2486959	CHI3L1.11104.13.3	COVID_D1	33	-0.0488916	0.0241571	0.0429802	0.645988	0.423	0.0318	2.257e-40	-0.0071643	0.034323	0.834658	Yes	Not assessed
1:203225416:C:CATT	rs140940634	CHI3L1.11104.13.3	COVID_D1	33	-0.0488916	0.0241571	0.0429802	0.645988	-0.3336	0.0372	3.02655e-19	-0.028389	0.068819	0.679961	Yes	Not assessed
1:203227881:G:A	rs140482839	CHI3L1.11104.13.3	COVID_D1	33	-0.0488916	0.0241571	0.0429802	0.645988	1.0395	0.1924	6.56062e-08	-0.38437	0.26189	0.142192	No	Not a missense variant or in LD with missense variants
1:203231068:T:C	rs17533071	CHI3L1.11104.13.3	COVID_D1	33	-0.0488916	0.0241571	0.0429802	0.645988	-0.1945	0.0247	3.42125e-15	0.02242	0.028183	0.426314	Yes	Not assessed
1:203236187:C:T	rs111369200	CHI3L1.11104.13.3	COVID_D1	33	-0.0488916	0.0241571	0.0429802	0.645988	0.4703	0.0715	4.7803e-11	-0.087177	0.092402	0.345449	Yes	Not assessed
1:203237117:C:T	rs12747110	CHI3L1.11104.13.3	COVID_D1	33	-0.0488916	0.0241571	0.0429802	0.645988	0.463	0.1024	6.14075e-06	0.026401	0.12434	0.83185	Yes	Not assessed
1:203239894:C:T	rs116622976	CHI3L1.11104.13.3	COVID_D1	33	-0.0488916	0.0241571	0.0429802	0.645988	0.6092	0.0833	2.60611e-13	0.20975	0.1238	0.0902149	Yes	Not assessed
1:203319299:G:C	rs12240123	CHI3L1.11104.13.3	COVID_D1	33	-0.0488916	0.0241571	0.0429802	0.645988	-0.2841	0.0396	7.27087e-13	-0.037131	0.042111	0.377917	Yes	Not assessed
15:49149142:C:A	rs75026498	FGF7.14031.18.3	COVID_D1	7	-0.175592	0.0842675	0.0371838	0.645988	-0.4276	0.0747	1.03904e-08	0.0063236	0.099749	0.949452	Yes	Not assessed
15:49579681:C:G	rs12899680	FGF7.14031.18.3	COVID_D1	7	-0.175592	0.0842675	0.0371838	0.645988	-0.1751	0.0248	1.65924e-12	-0.008576	0.026514	0.746353	Yes	Not assessed
15:49760175:G:A	rs118020827	FGF7.14031.18.3	COVID_D1	7	-0.175592	0.0842675	0.0371838	0.645988	0.5557	0.0915	1.25367e-09	-0.11991	0.11788	0.309048	Yes	Not assessed
15:49766684:A:G	rs519915	FGF7.14031.18.3	COVID_D1	7	-0.175592	0.0842675	0.0371838	0.645988	-0.1327	0.0248	8.75631e-08	0.023059	0.026625	0.386454	Yes	Not assessed
15:49961348:G:C	rs11070738	FGF7.14031.18.3	COVID_D1	7	-0.175592	0.0842675	0.0371838	0.645988	-0.1281	0.0243	1.35236e-07	0.010532	0.026535	0.691434	Yes	Not assessed
15:50072644:T:C	rs7162172	FGF7.14031.18.3	COVID_D1	7	-0.175592	0.0842675	0.0371838	0.645988	-0.1856	0.0258	6.30132e-13	0.10065	0.027555	0.000259503	Yes	Not assessed
15:50258988:A:G	rs854155	FGF7.14031.18.3	COVID_D1	7	-0.175592	0.0842675	0.0371838	0.645988	0.1154	0.0248	3.26782e-06	-0.025392	0.026826	0.343871	Yes	Not assessed
4:17512654:G:T	rs2597782	QDPR.11257.1.3	COVID_D1	8	0.108392	0.0530256	0.0409392	0.645988	0.3189	0.0423	4.73563e-14	0.057349	0.046018	0.21268	Yes	Not assessed
4:17518443:C:T	rs28719835	QDPR.11257.1.3	COVID_D1	8	0.108392	0.0530256	0.0409392	0.645988	-0.5668	0.0275	2.19078e-94	-0.066177	0.031008	0.0328271	Yes	Not assessed
4:17529010:G:A	rs146963227	QDPR.11257.1.3	COVID_D1	8	0.108392	0.0530256	0.0409392	0.645988	-0.7367	0.141	1.74322e-07	-0.011819	0.17322	0.945602	Yes	Not assessed
4:17529813:G:T	rs73234972	QDPR.11257.1.3	COVID_D1	8	0.108392	0.0530256	0.0409392	0.645988	-0.5899	0.1164	4.02293e-07	0.014633	0.12244	0.90487	Yes	Not assessed
4:17548229:GCCT:G	rs370028680	QDPR.11257.1.3	COVID_D1	8	0.108392	0.0530256	0.0409392	0.645988	-0.5238	0.1052	6.38848e-07	-0.47026	0.20698	0.0230861	Yes	Not assessed
4:17551129:A:G	rs7678754	QDPR.11257.1.3	COVID_D1	8	0.108392	0.0530256	0.0409392	0.645988	-0.1532	0.0257	2.50562e-09	-0.016505	0.028228	0.558747	Yes	Not assessed
4:17605333:C:T	rs76160459	QDPR.11257.1.3	COVID_D1	8	0.108392	0.0530256	0.0409392	0.645988	0.2118	0.0466	5.49185e-06	-0.0079255	0.056109	0.887671	Yes	Not assessed
4:18206568:T:G	rs77460972	QDPR.11257.1.3	COVID_D1	8	0.108392	0.0530256	0.0409392	0.645988	-0.1838	0.04	4.32749e-06	0.0078386	0.046448	0.865985	Yes	Not assessed
9:133207796:T:C	rs118152780	ADAMTS13.3175.51.5	COVID_D1	8	-0.100657	0.0409121	0.0138816	0.645988	-0.3914	0.0714	4.21037e-08	0.032805	0.10042	0.743911	Yes	Not assessed
9:133256205:G:C	rs7853989	ADAMTS13.3175.51.5	COVID_D1	8	-0.100657	0.0409121	0.0138816	0.645988	-0.276	0.043	1.37529e-10	0.04248	0.047018	0.366269	Yes	Not assessed
9:133284710:G:A	rs72775457	ADAMTS13.3175.51.5	COVID_D1	8	-0.100657	0.0409121	0.0138816	0.645988	-0.5268	0.0726	3.98121e-13	0.032195	0.047933	0.501796	Yes	Not assessed
9:133410264:G:A	rs28551042	ADAMTS13.3175.51.5	COVID_D1	8	-0.100657	0.0409121	0.0138816	0.645988	0.74	0.0631	9.22306e-32	0.062433	0.065819	0.342847	Yes	Not assessed
9:133433011:T:G	rs71503194	ADAMTS13.3175.51.5	COVID_D1	8	-0.100657	0.0409121	0.0138816	0.645988	-0.8719	0.0404	2.66971e-103	0.13811	0.047824	0.00387847	Yes	Not assessed
9:133449556:C:G	rs2301613	ADAMTS13.3175.51.5	COVID_D1	8	-0.100657	0.0409121	0.0138816	0.645988	-0.2545	0.0253	8.36003e-24	0.030644	0.030307	0.311959	Yes	Not assessed
9:133494060:A:G	rs736418	ADAMTS13.3175.51.5	COVID_D1	8	-0.100657	0.0409121	0.0138816	0.645988	-0.1746	0.03	5.88476e-09	0.013526	0.040547	0.73869	Yes	Not assessed
9:133512978:A:G	rs28469613	ADAMTS13.3175.51.5	COVID_D1	8	-0.100657	0.0409121	0.0138816	0.645988	-0.1852	0.0249	1.02414e-13	0.019545	0.033564	0.560351	Yes	Not assessed
7:83091834:T:G	rs73170036	SEMA3E.5363.51.3	COVID_D1	30	-0.0660335	0.0278044	0.0175522	0.645988	0.2993	0.0553	6.22215e-08	-0.078069	0.073514	0.288253	Yes	Not assessed
7:83100286:T:A	rs185676951	SEMA3E.5363.51.3	COVID_D1	30	-0.0660335	0.0278044	0.0175522	0.645988	-0.6135	0.1077	1.22379e-08	-0.13343	0.12909	0.301314	Yes	Not assessed
7:83107733:A:G	rs6975088	SEMA3E.5363.51.3	COVID_D1	30	-0.0660335	0.0278044	0.0175522	0.645988	0.1412	0.0252	2.10461e-08	0.057107	0.042894	0.183073	Yes	Not assessed
7:83131554:T:C	rs35378304	SEMA3E.5363.51.3	COVID_D1	30	-0.0660335	0.0278044	0.0175522	0.645988	0.1583	0.0301	1.44734e-07	-0.0037632	0.029932	0.89995	Yes	Not assessed
7:83160589:T:G	rs12668225	SEMA3E.5363.51.3	COVID_D1	30	-0.0660335	0.0278044	0.0175522	0.645988	0.2146	0.043	6.01616e-07	-0.0045624	0.04557	0.92025	Yes	Not assessed
7:83162690:C:T	rs62622792	SEMA3E.5363.51.3	COVID_D1	30	-0.0660335	0.0278044	0.0175522	0.645988	-0.5624	0.0794	1.40941e-12	0.032317	0.091695	0.724508	Yes	Not assessed
7:83167229:A:T	rs62458620	SEMA3E.5363.51.3	COVID_D1	30	-0.0660335	0.0278044	0.0175522	0.645988	0.2902	0.0524	3.05652e-08	-0.070235	0.05985	0.240588	Yes	Not assessed
7:83215887:A:G	rs139692550	SEMA3E.5363.51.3	COVID_D1	30	-0.0660335	0.0278044	0.0175522	0.645988	-0.8126	0.1485	4.4485e-08	-0.27523	0.29547	0.351596	No	Not a missense variant or in LD with missense variants
7:83220570:G:A	rs150009827	SEMA3E.5363.51.3	COVID_D1	30	-0.0660335	0.0278044	0.0175522	0.645988	-0.8829	0.105	4.15035e-17	-0.034883	0.14289	0.807134	Yes	Not assessed
7:83243258:A:T	rs73165984	SEMA3E.5363.51.3	COVID_D1	30	-0.0660335	0.0278044	0.0175522	0.645988	-0.7585	0.1181	1.34034e-10	0.096124	0.12935	0.457402	Yes	Not assessed
7:83316882:C:T	rs145664992	SEMA3E.5363.51.3	COVID_D1	30	-0.0660335	0.0278044	0.0175522	0.645988	0.4887	0.1069	4.84102e-06	-0.083991	0.13976	0.547863	Yes	Not assessed
7:83333511:G:A	rs34388701	SEMA3E.5363.51.3	COVID_D1	30	-0.0660335	0.0278044	0.0175522	0.645988	0.2811	0.0252	6.78743e-29	-0.03903	0.02766	0.158226	Yes	Not assessed
7:83345809:G:A	rs117307258	SEMA3E.5363.51.3	COVID_D1	30	-0.0660335	0.0278044	0.0175522	0.645988	-1.1095	0.1431	8.95211e-15	0.2981	0.15078	0.0480357	No	Not a missense variant or in LD with missense variants
7:83352025:A:C	rs545409966	SEMA3E.5363.51.3	COVID_D1	30	-0.0660335	0.0278044	0.0175522	0.645988	-1.0421	0.1039	1.12703e-23	0.26997	0.17527	0.123485	Yes	Not assessed
7:83369100:T:C	rs73169960	SEMA3E.5363.51.3	COVID_D1	30	-0.0660335	0.0278044	0.0175522	0.645988	-0.2773	0.0318	2.77893e-18	-0.027089	0.033026	0.412084	Yes	Not assessed
7:83405046:G:C	rs3757607	SEMA3E.5363.51.3	COVID_D1	30	-0.0660335	0.0278044	0.0175522	0.645988	-1.1204	0.0323	1.22418e-263	0.064001	0.039352	0.10387	Yes	Not assessed
7:83427634:G:A	rs74878046	SEMA3E.5363.51.3	COVID_D1	30	-0.0660335	0.0278044	0.0175522	0.645988	0.2973	0.0496	2.04802e-09	0.0015505	0.064475	0.980814	Yes	Not assessed
7:83446937:C:T	rs187536849	SEMA3E.5363.51.3	COVID_D1	30	-0.0660335	0.0278044	0.0175522	0.645988	0.6331	0.1045	1.37505e-09	-0.076669	0.12106	0.526529	Yes	Not assessed
7:83535678:T:C	rs78489729	SEMA3E.5363.51.3	COVID_D1	30	-0.0660335	0.0278044	0.0175522	0.645988	0.5665	0.1114	3.67087e-07	-0.054896	0.11964	0.646347	Yes	Not assessed
7:83538923:T:C	rs62477040	SEMA3E.5363.51.3	COVID_D1	30	-0.0660335	0.0278044	0.0175522	0.645988	-0.1432	0.0322	8.69948e-06	0.0278	0.036308	0.443872	Yes	Not assessed
7:83566286:G:T	rs113444060	SEMA3E.5363.51.3	COVID_D1	30	-0.0660335	0.0278044	0.0175522	0.645988	-0.393	0.0559	2.05925e-12	0.036241	0.073917	0.623926	Yes	Not assessed
7:83614561:A:T	rs116852579	SEMA3E.5363.51.3	COVID_D1	30	-0.0660335	0.0278044	0.0175522	0.645988	0.4702	0.0907	2.17033e-07	0.18895	0.10873	0.0822477	Yes	Not assessed
7:83647552:T:G	rs118126619	SEMA3E.5363.51.3	COVID_D1	30	-0.0660335	0.0278044	0.0175522	0.645988	0.6818	0.0801	1.71165e-17	0.093525	0.10166	0.357584	Yes	Not assessed
7:83649577:C:T	rs109467	SEMA3E.5363.51.3	COVID_D1	30	-0.0660335	0.0278044	0.0175522	0.645988	-0.5101	0.0241	1.96652e-99	0.046137	0.028074	0.100299	Yes	Not assessed
7:83672142:C:T	rs646631	SEMA3E.5363.51.3	COVID_D1	30	-0.0660335	0.0278044	0.0175522	0.645988	-0.1586	0.0252	3.10085e-10	-0.017505	0.027179	0.519534	Yes	Not assessed
7:83684319:A:G	rs187029140	SEMA3E.5363.51.3	COVID_D1	30	-0.0660335	0.0278044	0.0175522	0.645988	0.4538	0.0992	4.77138e-06	-0.059813	0.14459	0.679113	Yes	Not assessed
7:83781175:T:C	rs10271673	SEMA3E.5363.51.3	COVID_D1	30	-0.0660335	0.0278044	0.0175522	0.645988	0.1109	0.0248	7.75733e-06	-0.0063091	0.026759	0.813607	Yes	Not assessed
7:83793821:T:A	rs12707601	SEMA3E.5363.51.3	COVID_D1	30	-0.0660335	0.0278044	0.0175522	0.645988	0.1423	0.0259	3.92467e-08	0.019371	0.032606	0.55245	Yes	Not assessed
7:83939472:T:C	rs701310	SEMA3E.5363.51.3	COVID_D1	30	-0.0660335	0.0278044	0.0175522	0.645988	-0.1405	0.0262	8.20346e-08	-0.0015982	0.027527	0.953701	Yes	Not assessed
7:84150931:C:T	rs538943730	SEMA3E.5363.51.3	COVID_D1	30	-0.0660335	0.0278044	0.0175522	0.645988	-0.2653	0.06	9.79425e-06	-0.008392	0.11991	0.944205	Yes	Not assessed
1:169388498:C:T	rs114778133	SELP.4154.57.2	COVID_D1	10	0.105584	0.0424078	0.0127839	0.645988	-0.3772	0.08	2.41711e-06	-0.0426	0.086788	0.623532	Yes	Not assessed
1:169406725:T:G	rs182855188	SELP.4154.57.2	COVID_D1	10	0.105584	0.0424078	0.0127839	0.645988	-0.5102	0.093	4.11087e-08	-0.039801	0.11399	0.726968	Yes	Not assessed
1:169534258:C:T	rs140217668	SELP.4154.57.2	COVID_D1	10	0.105584	0.0424078	0.0127839	0.645988	-0.5534	0.093	2.67263e-09	-0.12061	0.10408	0.24653	Yes	Not assessed
1:169578479:G:A	rs12755775	SELP.4154.57.2	COVID_D1	10	0.105584	0.0424078	0.0127839	0.645988	0.2588	0.0415	4.48487e-10	-0.035904	0.058058	0.536301	Yes	Not assessed
1:169592036:T:C	rs3917836	SELP.4154.57.2	COVID_D1	10	0.105584	0.0424078	0.0127839	0.645988	0.2316	0.0426	5.43009e-08	0.067319	0.048551	0.165575	Yes	Not assessed
1:169593666:C:T	rs6128	SELP.4154.57.2	COVID_D1	10	0.105584	0.0424078	0.0127839	0.645988	-0.3584	0.0336	1.45762e-26	-0.06858	0.036956	0.0634934	Yes	Not assessed
1:169594713:T:G	rs6136	SELP.4154.57.2	COVID_D1	10	0.105584	0.0424078	0.0127839	0.645988	-0.8073	0.0371	5.54179e-105	-0.073167	0.042802	0.0873714	Yes	Not assessed
1:169610584:G:T	rs2235303	SELP.4154.57.2	COVID_D1	10	0.105584	0.0424078	0.0127839	0.645988	-0.2071	0.0247	5.08919e-17	0.0081136	0.027605	0.768821	Yes	Not assessed
1:169766268:A:G	rs79180034	SELP.4154.57.2	COVID_D1	10	0.105584	0.0424078	0.0127839	0.645988	-0.3715	0.0554	2.00339e-11	-0.018797	0.062716	0.764394	Yes	Not assessed
1:170019672:A:G	rs71635640	SELP.4154.57.2	COVID_D1	10	0.105584	0.0424078	0.0127839	0.645988	-0.292	0.0604	1.33523e-06	-0.030714	0.076204	0.686912	Yes	Not assessed
1:19833581:C:T	rs4655239	PLA2G2A.2692.74.2	COVID_D1	17	-0.0632158	0.0303399	0.0371978	0.645988	-0.1464	0.0298	8.9807e-07	0.025134	0.032991	0.446153	Yes	Not assessed
1:19839965:G:A	rs6426832	PLA2G2A.2692.74.2	COVID_D1	17	-0.0632158	0.0303399	0.0371978	0.645988	-0.1815	0.0256	1.34264e-12	0.0002436	0.027553	0.992946	Yes	Not assessed
1:19888485:G:C	rs112483005	PLA2G2A.2692.74.2	COVID_D1	17	-0.0632158	0.0303399	0.0371978	0.645988	0.742	0.0896	1.21889e-16	-0.23961	0.1214	0.0484132	Yes	Not assessed
1:19949375:G:C	rs12083280	PLA2G2A.2692.74.2	COVID_D1	17	-0.0632158	0.0303399	0.0371978	0.645988	0.1708	0.0327	1.75818e-07	-0.051826	0.039699	0.191732	Yes	Not assessed
1:19966255:C:T	rs182776958	PLA2G2A.2692.74.2	COVID_D1	17	-0.0632158	0.0303399	0.0371978	0.645988	0.7107	0.0959	1.25498e-13	-0.16459	0.10175	0.105751	Yes	Not assessed
1:19970056:G:A	rs116826061	PLA2G2A.2692.74.2	COVID_D1	17	-0.0632158	0.0303399	0.0371978	0.645988	-0.3214	0.0689	3.0902e-06	0.0593	0.075721	0.433546	Yes	Not assessed
1:19970294:C:T	rs76854748	PLA2G2A.2692.74.2	COVID_D1	17	-0.0632158	0.0303399	0.0371978	0.645988	0.9922	0.1374	5.15112e-13	0.10715	0.17749	0.546046	No	Not a missense variant or in LD with missense variants
1:19971259:A:T	rs10916682	PLA2G2A.2692.74.2	COVID_D1	17	-0.0632158	0.0303399	0.0371978	0.645988	-0.3583	0.0367	1.62374e-22	0.062569	0.041755	0.134009	Yes	Not assessed
1:19979653:G:C	rs11573156	PLA2G2A.2692.74.2	COVID_D1	17	-0.0632158	0.0303399	0.0371978	0.645988	1.0205	0.0243	0	-0.057809	0.03124	0.0642444	Yes	Not assessed
1:19984785:G:C	rs116205673	PLA2G2A.2692.74.2	COVID_D1	17	-0.0632158	0.0303399	0.0371978	0.645988	-0.2729	0.0325	4.5833e-17	0.013586	0.035486	0.701827	Yes	Not assessed
1:20006402:A:G	rs188825593	PLA2G2A.2692.74.2	COVID_D1	17	-0.0632158	0.0303399	0.0371978	0.645988	0.9578	0.105	7.38154e-20	-0.31636	0.19559	0.105778	Yes	Not assessed
1:20011923:G:A	rs1605318	PLA2G2A.2692.74.2	COVID_D1	17	-0.0632158	0.0303399	0.0371978	0.645988	0.2669	0.0313	1.49989e-17	-0.029546	0.033769	0.381604	Yes	Not assessed
1:20019699:A:G	rs7545093	PLA2G2A.2692.74.2	COVID_D1	17	-0.0632158	0.0303399	0.0371978	0.645988	-0.3077	0.0441	3.00855e-12	0.11834	0.053064	0.0257383	Yes	Not assessed
1:20056228:C:T	rs112575131	PLA2G2A.2692.74.2	COVID_D1	17	-0.0632158	0.0303399	0.0371978	0.645988	0.9016	0.1205	7.31121e-14	0.25175	0.13769	0.0674922	Yes	Not assessed
1:20098865:GC:G	rs34300542	PLA2G2A.2692.74.2	COVID_D1	17	-0.0632158	0.0303399	0.0371978	0.645988	0.2311	0.0326	1.35126e-12	0.075819	0.061917	0.220754	Yes	Not assessed
1:20115140:A:G	rs10916711	PLA2G2A.2692.74.2	COVID_D1	17	-0.0632158	0.0303399	0.0371978	0.645988	0.1335	0.0261	3.13836e-07	-0.023338	0.030057	0.437479	Yes	Not assessed
1:20381638:G:A	rs151093816	PLA2G2A.2692.74.2	COVID_D1	17	-0.0632158	0.0303399	0.0371978	0.645988	0.399	0.0718	2.74289e-08	-0.089213	0.073769	0.226526	Yes	Not assessed
3:190505402:G:A	rs6444430	IL1RAP.14048.7.3	COVID_D1	21	0.0656752	0.028014	0.0190592	0.645988	0.1543	0.0326	2.21085e-06	0.066157	0.044086	0.13345	Yes	Not assessed
3:190554342:A:T	rs9825315	IL1RAP.14048.7.3	COVID_D1	21	0.0656752	0.028014	0.0190592	0.645988	-0.1285	0.0264	1.13062e-06	0.018684	0.029361	0.524545	Yes	Not assessed
3:190559206:G:T	rs2885370	IL1RAP.14048.7.3	COVID_D1	21	0.0656752	0.028014	0.0190592	0.645988	-0.2086	0.0306	9.29655e-12	-0.095713	0.036383	0.00852075	Yes	Not assessed
3:190568399:A:G	rs71310871	IL1RAP.14048.7.3	COVID_D1	21	0.0656752	0.028014	0.0190592	0.645988	0.4596	0.0825	2.53414e-08	0.0074114	0.23876	0.975237	Yes	Not assessed
3:190576048:T:C	rs141211213	IL1RAP.14048.7.3	COVID_D1	21	0.0656752	0.028014	0.0190592	0.645988	1.1013	0.1752	3.25836e-10	0.16563	0.36665	0.651457	No	Not a missense variant or in LD with missense variants
3:190577941:A:G	rs6801017	IL1RAP.14048.7.3	COVID_D1	21	0.0656752	0.028014	0.0190592	0.645988	-0.2023	0.0306	3.81446e-11	-0.054831	0.032844	0.0950307	Yes	Not assessed
3:190582543:C:A	rs140877895	IL1RAP.14048.7.3	COVID_D1	21	0.0656752	0.028014	0.0190592	0.645988	0.3615	0.0467	9.8716e-15	0.048132	0.051643	0.351329	Yes	Not assessed
3:190586016:A:G	rs6444435	IL1RAP.14048.7.3	COVID_D1	21	0.0656752	0.028014	0.0190592	0.645988	-0.1705	0.026	5.46468e-11	-0.0077969	0.031411	0.803963	Yes	Not assessed
3:190594581:C:G	rs73200020	IL1RAP.14048.7.3	COVID_D1	21	0.0656752	0.028014	0.0190592	0.645988	-0.3292	0.0567	6.39843e-09	-0.03531	0.079474	0.656828	Yes	Not assessed
3:190605340:A:C	rs148444168	IL1RAP.14048.7.3	COVID_D1	21	0.0656752	0.028014	0.0190592	0.645988	1.2698	0.1265	1.03815e-23	0.19017	0.15703	0.225879	Yes	Not assessed
3:190609231:A:G	rs41268633	IL1RAP.14048.7.3	COVID_D1	21	0.0656752	0.028014	0.0190592	0.645988	-0.2514	0.0504	6.09775e-07	-0.0070765	0.065319	0.913728	Yes	Not assessed
3:190615966:C:T	rs62288218	IL1RAP.14048.7.3	COVID_D1	21	0.0656752	0.028014	0.0190592	0.645988	-0.2566	0.0537	1.76697e-06	-0.080681	0.067245	0.230214	Yes	Not assessed
3:190628271:A:G	rs6444442	IL1RAP.14048.7.3	COVID_D1	21	0.0656752	0.028014	0.0190592	0.645988	-1.352	0.0246	0	-0.097262	0.039108	0.0128822	Yes	Not assessed
3:190629458:C:A	rs148996090	IL1RAP.14048.7.3	COVID_D1	21	0.0656752	0.028014	0.0190592	0.645988	1.1107	0.1365	4.05205e-16	-0.13463	0.20523	0.511827	Yes	Not assessed
3:190629943:T:C	rs1024949	IL1RAP.14048.7.3	COVID_D1	21	0.0656752	0.028014	0.0190592	0.645988	-0.4479	0.0399	3.05432e-29	-0.0019818	0.047557	0.96676	Yes	Not assessed
3:190639782:A:G	rs67249092	IL1RAP.14048.7.3	COVID_D1	21	0.0656752	0.028014	0.0190592	0.645988	-0.379	0.0345	4.48711e-28	0.051358	0.041691	0.217997	Yes	Not assessed
3:190642782:C:T	rs3935774	IL1RAP.14048.7.3	COVID_D1	21	0.0656752	0.028014	0.0190592	0.645988	0.7411	0.1119	3.52273e-11	0.24644	0.13749	0.0730655	Yes	Not assessed
3:190657144:G:A	rs78129851	IL1RAP.14048.7.3	COVID_D1	21	0.0656752	0.028014	0.0190592	0.645988	0.7929	0.1167	1.08806e-11	0.30371	0.15704	0.0531173	Yes	Not assessed
3:190770113:A:G	rs6771380	IL1RAP.14048.7.3	COVID_D1	21	0.0656752	0.028014	0.0190592	0.645988	0.1331	0.0267	6.19558e-07	-0.024891	0.028322	0.379479	Yes	Not assessed
3:190814114:C:T	rs36063565	IL1RAP.14048.7.3	COVID_D1	21	0.0656752	0.028014	0.0190592	0.645988	0.7522	0.0694	2.2586e-27	-0.029126	0.12396	0.814238	Yes	Not assessed
3:190849419:G:A	rs1466889	IL1RAP.14048.7.3	COVID_D1	21	0.0656752	0.028014	0.0190592	0.645988	0.1977	0.0339	5.48134e-09	-0.0063105	0.032278	0.844998	Yes	Not assessed
3:190443354:AT:A	rs11343024	IL1RAP.2630.12.2	COVID_D1	22	0.0631817	0.0272662	0.020492	0.645988	0.1351	0.0294	4.32255e-06	-0.0051782	0.046687	0.911685	Yes	Not assessed
3:190505402:G:A	rs6444430	IL1RAP.2630.12.2	COVID_D1	22	0.0631817	0.0272662	0.020492	0.645988	0.1621	0.0326	6.61316e-07	0.066157	0.044086	0.13345	Yes	Not assessed
3:190554336:A:G	rs9825312	IL1RAP.2630.12.2	COVID_D1	22	0.0631817	0.0272662	0.020492	0.645988	-0.1348	0.0265	3.6417e-07	0.017872	0.029364	0.542765	Yes	Not assessed
3:190559206:G:T	rs2885370	IL1RAP.2630.12.2	COVID_D1	22	0.0631817	0.0272662	0.020492	0.645988	-0.2148	0.0306	2.22492e-12	-0.095713	0.036383	0.00852075	Yes	Not assessed
3:190568399:A:G	rs71310871	IL1RAP.2630.12.2	COVID_D1	22	0.0631817	0.0272662	0.020492	0.645988	0.3994	0.0826	1.32911e-06	0.0074114	0.23876	0.975237	Yes	Not assessed
3:190576048:T:C	rs141211213	IL1RAP.2630.12.2	COVID_D1	22	0.0631817	0.0272662	0.020492	0.645988	1.1873	0.175	1.16432e-11	0.16563	0.36665	0.651457	No	Not a missense variant or in LD with missense variants
3:190577941:A:G	rs6801017	IL1RAP.2630.12.2	COVID_D1	22	0.0631817	0.0272662	0.020492	0.645988	-0.1903	0.0306	5.00479e-10	-0.054831	0.032844	0.0950307	Yes	Not assessed
3:190582543:C:A	rs140877895	IL1RAP.2630.12.2	COVID_D1	22	0.0631817	0.0272662	0.020492	0.645988	0.3963	0.0465	1.56037e-17	0.048132	0.051643	0.351329	Yes	Not assessed
3:190586016:A:G	rs6444435	IL1RAP.2630.12.2	COVID_D1	22	0.0631817	0.0272662	0.020492	0.645988	-0.1834	0.026	1.74039e-12	-0.0077969	0.031411	0.803963	Yes	Not assessed
3:190594581:C:G	rs73200020	IL1RAP.2630.12.2	COVID_D1	22	0.0631817	0.0272662	0.020492	0.645988	-0.3286	0.0567	6.81527e-09	-0.03531	0.079474	0.656828	Yes	Not assessed
3:190605340:A:C	rs148444168	IL1RAP.2630.12.2	COVID_D1	22	0.0631817	0.0272662	0.020492	0.645988	1.2597	0.1266	2.51583e-23	0.19017	0.15703	0.225879	Yes	Not assessed
3:190609231:A:G	rs41268633	IL1RAP.2630.12.2	COVID_D1	22	0.0631817	0.0272662	0.020492	0.645988	-0.3187	0.0503	2.35831e-10	-0.0070765	0.065319	0.913728	Yes	Not assessed
3:190615966:C:T	rs62288218	IL1RAP.2630.12.2	COVID_D1	22	0.0631817	0.0272662	0.020492	0.645988	-0.3211	0.0536	2.08976e-09	-0.080681	0.067245	0.230214	Yes	Not assessed
3:190628271:A:G	rs6444442	IL1RAP.2630.12.2	COVID_D1	22	0.0631817	0.0272662	0.020492	0.645988	-1.3827	0.0241	0	-0.097262	0.039108	0.0128822	Yes	Not assessed
3:190629458:C:A	rs148996090	IL1RAP.2630.12.2	COVID_D1	22	0.0631817	0.0272662	0.020492	0.645988	1.1474	0.1364	4.02997e-17	-0.13463	0.20523	0.511827	Yes	Not assessed
3:190629943:T:C	rs1024949	IL1RAP.2630.12.2	COVID_D1	22	0.0631817	0.0272662	0.020492	0.645988	-0.4835	0.0398	5.86129e-34	-0.0019818	0.047557	0.96676	Yes	Not assessed
3:190642782:C:T	rs3935774	IL1RAP.2630.12.2	COVID_D1	22	0.0631817	0.0272662	0.020492	0.645988	0.796	0.1118	1.08039e-12	0.24644	0.13749	0.0730655	Yes	Not assessed
3:190645805:G:A	rs34879831	IL1RAP.2630.12.2	COVID_D1	22	0.0631817	0.0272662	0.020492	0.645988	-0.398	0.0337	3.46195e-32	0.052355	0.04009	0.191574	Yes	Not assessed
3:190657144:G:A	rs78129851	IL1RAP.2630.12.2	COVID_D1	22	0.0631817	0.0272662	0.020492	0.645988	0.7929	0.1167	1.08806e-11	0.30371	0.15704	0.0531173	Yes	Not assessed
3:190770113:A:G	rs6771380	IL1RAP.2630.12.2	COVID_D1	22	0.0631817	0.0272662	0.020492	0.645988	0.124	0.0267	3.41405e-06	-0.024891	0.028322	0.379479	Yes	Not assessed
3:190814114:C:T	rs36063565	IL1RAP.2630.12.2	COVID_D1	22	0.0631817	0.0272662	0.020492	0.645988	0.8048	0.0692	2.89901e-31	-0.029126	0.12396	0.814238	Yes	Not assessed
3:190829123:C:T	rs73888716	IL1RAP.2630.12.2	COVID_D1	22	0.0631817	0.0272662	0.020492	0.645988	0.2448	0.0398	7.71156e-10	0.0033988	0.041532	0.934777	Yes	Not assessed
20:34907268:C:T	rs145186586	CPNE1.5346.24.3	COVID_D1	15	-0.0946387	0.0395855	0.0168143	0.645988	-0.4903	0.0628	5.84146e-15	-0.15006	0.083824	0.0734251	Yes	Not assessed
20:35242541:C:A	rs144720724	CPNE1.5346.24.3	COVID_D1	15	-0.0946387	0.0395855	0.0168143	0.645988	-0.8145	0.1542	1.27711e-07	0.26516	0.18469	0.151087	Yes	Not assessed
20:35260269:C:T	rs58804088	CPNE1.5346.24.3	COVID_D1	15	-0.0946387	0.0395855	0.0168143	0.645988	-0.525	0.1088	1.39745e-06	0.07643	0.1032	0.458936	Yes	Not assessed
20:35275830:A:G	rs6060341	CPNE1.5346.24.3	COVID_D1	15	-0.0946387	0.0395855	0.0168143	0.645988	-0.2171	0.0305	1.09478e-12	0.027153	0.030594	0.374795	Yes	Not assessed
20:35499409:T:C	rs112321518	CPNE1.5346.24.3	COVID_D1	15	-0.0946387	0.0395855	0.0168143	0.645988	-0.3959	0.074	8.79542e-08	0.11662	0.079976	0.144789	Yes	Not assessed
20:35550722:G:A	rs117248227	CPNE1.5346.24.3	COVID_D1	15	-0.0946387	0.0395855	0.0168143	0.645988	-1.0016	0.139	5.77229e-13	0.25104	0.24406	0.303668	Yes	Not assessed
20:35567506:A:C	rs117707590	CPNE1.5346.24.3	COVID_D1	15	-0.0946387	0.0395855	0.0168143	0.645988	-1.059	0.1989	1.01352e-07	0.14513	0.19672	0.460667	No	Not a missense variant or in LD with missense variants
20:35626801:T:C	rs2425068	CPNE1.5346.24.3	COVID_D1	15	-0.0946387	0.0395855	0.0168143	0.645988	-0.5144	0.0512	9.48269e-24	0.035399	0.059224	0.550031	Yes	Not assessed
20:35630751:G:C	rs12481228	CPNE1.5346.24.3	COVID_D1	15	-0.0946387	0.0395855	0.0168143	0.645988	-0.977	0.0379	1.55049e-146	0.10257	0.043295	0.0178316	Yes	Not assessed
20:35636604:G:A	rs13041114	CPNE1.5346.24.3	COVID_D1	15	-0.0946387	0.0395855	0.0168143	0.645988	0.2739	0.0517	1.1716e-07	-0.10253	0.071063	0.149076	Yes	Not assessed
20:36029780:A:C	rs62213167	CPNE1.5346.24.3	COVID_D1	15	-0.0946387	0.0395855	0.0168143	0.645988	0.1376	0.0291	2.2616e-06	-0.052484	0.038459	0.172356	Yes	Not assessed
20:36141855:C:A	rs11697873	CPNE1.5346.24.3	COVID_D1	15	-0.0946387	0.0395855	0.0168143	0.645988	-0.6307	0.0982	1.3396e-10	-0.037267	0.15281	0.807325	Yes	Not assessed
20:36262442:C:T	rs2425196	CPNE1.5346.24.3	COVID_D1	15	-0.0946387	0.0395855	0.0168143	0.645988	-0.4339	0.0826	1.4962e-07	0.049131	0.087957	0.576449	Yes	Not assessed
20:36301513:G:A	rs189477530	CPNE1.5346.24.3	COVID_D1	15	-0.0946387	0.0395855	0.0168143	0.645988	-0.7524	0.1618	3.31637e-06	-0.11861	0.31684	0.708142	No	Not a missense variant or in LD with missense variants
20:36395210:A:G	rs2425247	CPNE1.5346.24.3	COVID_D1	15	-0.0946387	0.0395855	0.0168143	0.645988	-0.1247	0.0257	1.22136e-06	-0.01711	0.027392	0.532211	Yes	Not assessed
11:102549935:C:T	rs78379132	MMP12.4496.60.2	COVID_D1	11	0.105802	0.0521549	0.0424985	0.645988	-0.3869	0.0832	3.31548e-06	0.09057	0.092468	0.327346	Yes	Not assessed
11:102684481:G:C	rs140637416	MMP12.4496.60.2	COVID_D1	11	0.105802	0.0521549	0.0424985	0.645988	-0.302	0.0564	8.57412e-08	-0.085103	0.066626	0.201488	Yes	Not assessed
11:102848803:C:T	rs114176245	MMP12.4496.60.2	COVID_D1	11	0.105802	0.0521549	0.0424985	0.645988	-0.7818	0.0349	3.83583e-111	-0.087304	0.042055	0.0378987	Yes	Not assessed
11:102877643:A:G	rs74926032	MMP12.4496.60.2	COVID_D1	11	0.105802	0.0521549	0.0424985	0.645988	0.2726	0.0608	7.34105e-06	-0.04002	0.077899	0.607432	Yes	Not assessed
11:102896801:T:A	rs7939898	MMP12.4496.60.2	COVID_D1	11	0.105802	0.0521549	0.0424985	0.645988	0.2177	0.0255	1.37448e-17	0.096163	0.047099	0.0411793	Yes	Not assessed
11:102916531:C:T	rs185686655	MMP12.4496.60.2	COVID_D1	11	0.105802	0.0521549	0.0424985	0.645988	0.3037	0.0521	5.57022e-09	0.033869	0.06546	0.604877	Yes	Not assessed
11:102935729:T:C	rs66740390	MMP12.4496.60.2	COVID_D1	11	0.105802	0.0521549	0.0424985	0.645988	0.1836	0.0318	7.76025e-09	0.0097123	0.035554	0.784722	Yes	Not assessed
11:102975087:C:T	rs539860	MMP12.4496.60.2	COVID_D1	11	0.105802	0.0521549	0.0424985	0.645988	-0.1476	0.0259	1.20624e-08	-0.0057214	0.03043	0.850862	Yes	Not assessed
11:103070884:T:C	rs148898767	MMP12.4496.60.2	COVID_D1	11	0.105802	0.0521549	0.0424985	0.645988	-0.6236	0.1077	7.03203e-09	-0.061423	0.14766	0.677428	Yes	Not assessed
11:103073356:T:C	rs149640034	MMP12.4496.60.2	COVID_D1	11	0.105802	0.0521549	0.0424985	0.645988	-0.7049	0.1234	1.11448e-08	-0.083362	0.2488	0.737583	Yes	Not assessed
11:103419634:A:G	rs117021498	MMP12.4496.60.2	COVID_D1	11	0.105802	0.0521549	0.0424985	0.645988	-0.558	0.0712	4.61149e-15	-0.018667	0.095482	0.844999	Yes	Not assessed
17:57966635:A:G	rs6503842	MPO.2580.83.2	COVID_A1	6	-1.00005	0.0807804	0.0300978	0.645988	-0.1409	0.0302	3.07773e-06	0.14275	0.17314	0.409668	Yes	Not assessed
17:58268002:C:T	rs8178414	MPO.2580.83.2	COVID_A1	6	-1.00005	0.0807804	0.0300978	0.645988	-0.4972	0.1107	7.07505e-06	2.6351	0.68053	0.000107889	Yes	Not assessed
17:58273136:A:T	rs35400724	MPO.2580.83.2	COVID_A1	6	-1.00005	0.0807804	0.0300978	0.645988	-0.2185	0.0482	5.80981e-06	-0.11057	0.2877	0.700738	Yes	Not assessed
17:58281068:C:T	rs34097845	MPO.2580.83.2	COVID_A1	6	-1.00005	0.0807804	0.0300978	0.645988	-0.5736	0.0497	8.17312e-31	0.071706	0.38823	0.853465	Yes	Not assessed
17:58316272:T:C	rs2526381	MPO.2580.83.2	COVID_A1	6	-1.00005	0.0807804	0.0300978	0.645988	0.2633	0.033	1.47777e-15	-0.34665	0.1991	0.0816687	Yes	Not assessed
11:60788825:C:A	rs7123684	TMEM132A.7871.16.3	COVID_A1	10	-0.506668	0.0481964	0.0406933	0.645988	-0.2127	0.029	2.22579e-13	0.41422	0.17331	0.016846	Yes	Not assessed
11:60868266:C:T	rs56291461	TMEM132A.7871.16.3	COVID_A1	10	-0.506668	0.0481964	0.0406933	0.645988	-0.4861	0.0913	1.01395e-07	-0.33918	0.46767	0.468296	Yes	Not assessed
11:60931260:G:A	rs11230521	TMEM132A.7871.16.3	COVID_A1	10	-0.506668	0.0481964	0.0406933	0.645988	0.6176	0.0274	1.67765e-112	-0.42342	0.17604	0.0161615	Yes	Not assessed
11:60955538:G:A	rs541591	TMEM132A.7871.16.3	COVID_A1	10	-0.506668	0.0481964	0.0406933	0.645988	-1.1623	0.085	1.44955e-42	0.19037	0.43183	0.659325	Yes	Not assessed
11:60955950:A:G	rs72918838	TMEM132A.7871.16.3	COVID_A1	10	-0.506668	0.0481964	0.0406933	0.645988	-0.1762	0.0263	2.08963e-11	0.051621	0.15793	0.743774	Yes	Not assessed
11:60993435:C:T	rs11230554	TMEM132A.7871.16.3	COVID_A1	10	-0.506668	0.0481964	0.0406933	0.645988	0.2744	0.0523	1.54886e-07	-0.032019	0.37959	0.932777	Yes	Not assessed
11:61015636:C:T	rs2074229	TMEM132A.7871.16.3	COVID_A1	10	-0.506668	0.0481964	0.0406933	0.645988	0.1781	0.0247	5.5736e-13	-0.060673	0.16601	0.714755	Yes	Not assessed
11:61060461:C:T	rs11230581	TMEM132A.7871.16.3	COVID_A1	10	-0.506668	0.0481964	0.0406933	0.645988	0.1212	0.0257	2.40582e-06	0.023439	0.15567	0.880316	Yes	Not assessed
11:61119047:T:C	rs79811054	TMEM132A.7871.16.3	COVID_A1	10	-0.506668	0.0481964	0.0406933	0.645988	0.2322	0.041	1.4839e-08	0.0012026	0.24602	0.9961	Yes	Not assessed
19:51071752:C:T	rs62114140	CD33.3166.92.1	COVID_B1	21	0.117053	0.0423958	0.00576327	0.740714	-0.2485	0.0424	4.60506e-09	0.088301	0.069705	0.205233	Yes	Not assessed
19:51075598:G:A	rs2569487	CD33.3166.92.1	COVID_B1	21	0.117053	0.0423958	0.00576327	0.740714	0.1645	0.0284	6.94482e-09	0.042038	0.043673	0.335767	Yes	Not assessed
19:51137073:C:G	rs34681424	CD33.3166.92.1	COVID_B1	21	0.117053	0.0423958	0.00576327	0.740714	-0.236	0.0416	1.40255e-08	-0.0018168	0.080837	0.982069	Yes	Not assessed
19:51142883:G:C	rs140185670	CD33.3166.92.1	COVID_B1	21	0.117053	0.0423958	0.00576327	0.740714	-0.351	0.049	7.87777e-13	0.22076	0.10814	0.0412083	Yes	Not assessed
19:51177310:T:C	rs11670380	CD33.3166.92.1	COVID_B1	21	0.117053	0.0423958	0.00576327	0.740714	0.3147	0.0261	1.77138e-33	0.007293	0.043384	0.866502	Yes	Not assessed
19:51188632:A:G	rs80237306	CD33.3166.92.1	COVID_B1	21	0.117053	0.0423958	0.00576327	0.740714	-0.7147	0.0754	2.57274e-21	-0.079766	0.16328	0.62518	Yes	Not assessed
19:51217625:G:T	rs113518563	CD33.3166.92.1	COVID_B1	21	0.117053	0.0423958	0.00576327	0.740714	0.2811	0.0525	8.5895e-08	-0.020048	0.097214	0.836615	Yes	Not assessed
19:51217988:G:A	rs79254320	CD33.3166.92.1	COVID_B1	21	0.117053	0.0423958	0.00576327	0.740714	0.4767	0.0555	8.75852e-18	-0.0055619	0.096917	0.954236	Yes	Not assessed
19:51225221:C:T	rs12459419	CD33.3166.92.1	COVID_B1	21	0.117053	0.0423958	0.00576327	0.740714	-0.9436	0.0209	0	-0.094564	0.044762	0.0346354	Yes	Not assessed
19:51227217:TCCTTTCTATAAATG:T	rs1282600325	CD33.3166.92.1	COVID_B1	21	0.117053	0.0423958	0.00576327	0.740714	0.2819	0.0518	5.26606e-08	-0.23749	0.11587	0.0404011	Yes	Not assessed
19:51228619:A:G	rs145402896	CD33.3166.92.1	COVID_B1	21	0.117053	0.0423958	0.00576327	0.740714	-0.9479	0.1064	5.15718e-19	-0.38979	0.29865	0.191834	Yes	Not assessed
19:51235517:G:A	rs548309496	CD33.3166.92.1	COVID_B1	21	0.117053	0.0423958	0.00576327	0.740714	1.1357	0.1343	2.75662e-17	-0.054702	0.49778	0.912495	Yes	Not assessed
19:51235972:C:T	rs146995981	CD33.3166.92.1	COVID_B1	21	0.117053	0.0423958	0.00576327	0.740714	0.3719	0.0439	2.42199e-17	0.20894	0.086357	0.0155422	Yes	Not assessed
19:51258337:G:C	rs62115998	CD33.3166.92.1	COVID_B1	21	0.117053	0.0423958	0.00576327	0.740714	-1.0727	0.0795	1.71768e-41	-0.20572	0.15831	0.193781	Yes	Not assessed
19:51268068:T:G	rs140829879	CD33.3166.92.1	COVID_B1	21	0.117053	0.0423958	0.00576327	0.740714	0.3479	0.068	3.11791e-07	0.23549	0.12943	0.0688445	Yes	Not assessed
19:51279712:G:A	rs61291939	CD33.3166.92.1	COVID_B1	21	0.117053	0.0423958	0.00576327	0.740714	0.4311	0.061	1.58076e-12	-0.01546	0.081021	0.848671	Yes	Not assessed
19:51303082:G:A	rs117496758	CD33.3166.92.1	COVID_B1	21	0.117053	0.0423958	0.00576327	0.740714	-0.6034	0.0807	7.59947e-14	0.31949	0.19728	0.105345	Yes	Not assessed
19:51308534:A:G	rs10407329	CD33.3166.92.1	COVID_B1	21	0.117053	0.0423958	0.00576327	0.740714	0.3244	0.0712	5.20924e-06	0.056999	0.073749	0.439594	Yes	Not assessed
19:51363065:C:T	rs10411180	CD33.3166.92.1	COVID_B1	21	0.117053	0.0423958	0.00576327	0.740714	-0.2249	0.0245	4.32729e-20	-0.034365	0.039724	0.386987	Yes	Not assessed
19:51370052:C:T	rs62114169	CD33.3166.92.1	COVID_B1	21	0.117053	0.0423958	0.00576327	0.740714	0.1998	0.0388	2.61203e-07	-0.060515	0.068622	0.377852	Yes	Not assessed
19:51373988:G:T	rs150582568	CD33.3166.92.1	COVID_B1	21	0.117053	0.0423958	0.00576327	0.740714	-0.3052	0.0324	4.5215e-21	-0.035723	0.059469	0.54804	Yes	Not assessed
2:142972309:T:C	rs10928161	KYNU.4559.64.2	COVID_B1	5	-0.257904	0.102298	0.0116986	0.740714	0.2047	0.0457	7.4919e-06	0.11586	0.075102	0.122903	Yes	Not assessed
2:143001734:C:A	rs149139909	KYNU.4559.64.2	COVID_B1	5	-0.257904	0.102298	0.0116986	0.740714	-0.7896	0.1184	2.57695e-11	0.33064	0.24921	0.184591	Yes	Not assessed
2:143043636:C:A	rs73961713	KYNU.4559.64.2	COVID_B1	5	-0.257904	0.102298	0.0116986	0.740714	-0.509	0.0316	2.2563e-58	0.14179	0.05255	0.00697172	Yes	Not assessed
2:143123647:CACATCCAGTCTCGTGTTATTAAATGGTGCTTTTAT:C	rs577637672	KYNU.4559.64.2	COVID_B1	5	-0.257904	0.102298	0.0116986	0.740714	-0.6153	0.1246	7.8846e-07	0.16377	0.33198	0.621792	No	Not a missense variant or in LD with missense variants
2:143269647:G:A	rs16858955	KYNU.4559.64.2	COVID_B1	5	-0.257904	0.102298	0.0116986	0.740714	-0.2716	0.0596	5.18778e-06	0.13487	0.097841	0.168061	Yes	Not assessed
1:22494673:G:A	rs75098738	C1QC.14100.63.3	COVID_B1	12	0.182115	0.0681069	0.00749619	0.740714	0.4046	0.0763	1.1407e-07	-0.037738	0.15743	0.810553	Yes	Not assessed
1:22555842:G:C	rs35458366	C1QC.14100.63.3	COVID_B1	12	0.182115	0.0681069	0.00749619	0.740714	-0.1359	0.0245	2.90714e-08	-0.04863	0.040452	0.229299	Yes	Not assessed
1:22588588:G:A	rs474152	C1QC.14100.63.3	COVID_B1	12	0.182115	0.0681069	0.00749619	0.740714	0.2966	0.0255	2.8547e-31	0.093839	0.04062	0.0208789	Yes	Not assessed
1:22608048:T:C	rs61087408	C1QC.14100.63.3	COVID_B1	12	0.182115	0.0681069	0.00749619	0.740714	0.3839	0.0415	2.23231e-20	0.18354	0.098509	0.0624369	Yes	Not assessed
1:22615055:C:T	rs139104615	C1QC.14100.63.3	COVID_B1	12	0.182115	0.0681069	0.00749619	0.740714	0.9372	0.1173	1.35191e-15	0.23253	0.21595	0.28158	Yes	Not assessed
1:22617716:G:A	rs78865058	C1QC.14100.63.3	COVID_B1	12	0.182115	0.0681069	0.00749619	0.740714	1.0754	0.0603	3.83757e-71	0.076478	0.10846	0.480732	Yes	Not assessed
1:22625308:C:T	rs141126950	C1QC.14100.63.3	COVID_B1	12	0.182115	0.0681069	0.00749619	0.740714	0.9376	0.1066	1.42416e-18	0.065742	0.22236	0.767493	Yes	Not assessed
1:22644149:C:T	rs15940	C1QC.14100.63.3	COVID_B1	12	0.182115	0.0681069	0.00749619	0.740714	-0.2773	0.0279	2.81448e-23	0.019056	0.050716	0.707111	Yes	Not assessed
1:22669759:C:T	rs159179	C1QC.14100.63.3	COVID_B1	12	0.182115	0.0681069	0.00749619	0.740714	-0.2338	0.0497	2.54832e-06	-0.11557	0.070308	0.100224	Yes	Not assessed
1:22691071:A:C	rs294227	C1QC.14100.63.3	COVID_B1	12	0.182115	0.0681069	0.00749619	0.740714	-0.5651	0.0827	8.30806e-12	-0.20416	0.17513	0.24371	Yes	Not assessed
1:22739950:T:C	rs12730314	C1QC.14100.63.3	COVID_B1	12	0.182115	0.0681069	0.00749619	0.740714	-0.1661	0.0265	3.65892e-10	-0.048309	0.042278	0.253184	Yes	Not assessed
1:22753079:C:T	rs55798378	C1QC.14100.63.3	COVID_B1	12	0.182115	0.0681069	0.00749619	0.740714	0.1582	0.0335	2.33091e-06	0.013018	0.062425	0.834809	Yes	Not assessed
1:157456445:C:T	rs56368575	FCRL3.4440.15.2	COVID_B1	11	-0.206321	0.0793632	0.00933023	0.740714	-0.1317	0.0278	2.16467e-06	-0.0056533	0.057032	0.921039	Yes	Not assessed
1:157504837:G:A	rs11585674	FCRL3.4440.15.2	COVID_B1	11	-0.206321	0.0793632	0.00933023	0.740714	0.1487	0.0306	1.17696e-06	-0.012511	0.058365	0.830268	Yes	Not assessed
1:157509738:C:T	rs12118214	FCRL3.4440.15.2	COVID_B1	11	-0.206321	0.0793632	0.00933023	0.740714	0.1669	0.0307	5.43428e-08	-0.058713	0.067383	0.383573	Yes	Not assessed
1:157515714:G:A	rs115493285	FCRL3.4440.15.2	COVID_B1	11	-0.206321	0.0793632	0.00933023	0.740714	0.2952	0.0566	1.83275e-07	-0.044682	0.10238	0.662523	Yes	Not assessed
1:157538936:T:C	rs77241354	FCRL3.4440.15.2	COVID_B1	11	-0.206321	0.0793632	0.00933023	0.740714	0.2778	0.0572	1.19392e-06	0.21664	0.11041	0.0497461	Yes	Not assessed
1:157587005:G:T	rs115489340	FCRL3.4440.15.2	COVID_B1	11	-0.206321	0.0793632	0.00933023	0.740714	0.3789	0.0729	2.01953e-07	0.20787	0.21262	0.328243	Yes	Not assessed
1:157701026:A:G	rs7528684	FCRL3.4440.15.2	COVID_B1	11	-0.206321	0.0793632	0.00933023	0.740714	0.5253	0.0233	1.50125e-112	-0.1161	0.042011	0.00571742	Yes	Not assessed
1:157746108:C:G	rs79628425	FCRL3.4440.15.2	COVID_B1	11	-0.206321	0.0793632	0.00933023	0.740714	0.2697	0.0571	2.32057e-06	-0.12949	0.10171	0.202972	Yes	Not assessed
1:157747386:G:C	rs115272582	FCRL3.4440.15.2	COVID_B1	11	-0.206321	0.0793632	0.00933023	0.740714	0.4376	0.0927	2.35145e-06	-0.15837	0.19442	0.415315	Yes	Not assessed
1:157788521:AG:A	rs200232093	FCRL3.4440.15.2	COVID_B1	11	-0.206321	0.0793632	0.00933023	0.740714	0.3482	0.0756	4.10843e-06	0.071847	0.14468	0.619476	Yes	Not assessed
1:157926317:T:C	rs6675917	FCRL3.4440.15.2	COVID_B1	11	-0.206321	0.0793632	0.00933023	0.740714	0.1495	0.0269	2.73477e-08	-0.071992	0.052254	0.168286	Yes	Not assessed
9:136136778:G:A	rs148650343	QSOX2.8397.147.3	COVID_B1	8	0.283198	0.112662	0.011947	0.740714	-0.2917	0.0584	5.88775e-07	-0.36437	0.15924	0.022127	Yes	Not assessed
9:136181443:A:G	rs146465934	QSOX2.8397.147.3	COVID_B1	8	0.283198	0.112662	0.011947	0.740714	0.3148	0.0687	4.60018e-06	0.0059295	0.098502	0.951999	Yes	Not assessed
9:136199675:G:A	rs34356735	QSOX2.8397.147.3	COVID_B1	8	0.283198	0.112662	0.011947	0.740714	0.4033	0.0875	4.04332e-06	-0.21513	0.19683	0.274405	Yes	Not assessed
9:136207096:G:A	rs113189561	QSOX2.8397.147.3	COVID_B1	8	0.283198	0.112662	0.011947	0.740714	0.3265	0.0709	4.12312e-06	0.011793	0.15578	0.939655	Yes	Not assessed
9:136213967:A:AAC	rs77836657	QSOX2.8397.147.3	COVID_B1	8	0.283198	0.112662	0.011947	0.740714	-0.3556	0.0238	1.77808e-50	-0.080779	0.045276	0.0743999	Yes	Not assessed
9:136216078:C:T	rs78554234	QSOX2.8397.147.3	COVID_B1	8	0.283198	0.112662	0.011947	0.740714	-0.417	0.0725	8.83379e-09	-0.43858	0.13529	0.00118787	Yes	Not assessed
9:136234349:G:T	rs113703846	QSOX2.8397.147.3	COVID_B1	8	0.283198	0.112662	0.011947	0.740714	0.3625	0.0651	2.57153e-08	0.22743	0.1297	0.0795148	Yes	Not assessed
9:136259042:A:C	rs34514016	QSOX2.8397.147.3	COVID_B1	8	0.283198	0.112662	0.011947	0.740714	-0.1438	0.0249	7.69072e-09	-0.025552	0.040036	0.523327	Yes	Not assessed
9:136136778:G:A	rs148650343	QSOX2.8397.147.3	COVID_A1	8	0.949181	0.112662	0.011947	0.740714	-0.2917	0.0584	5.88775e-07	-0.71105	0.45848	0.120929	Yes	Not assessed
9:136181443:A:G	rs146465934	QSOX2.8397.147.3	COVID_A1	8	0.949181	0.112662	0.011947	0.740714	0.3148	0.0687	4.60018e-06	0.043567	0.34813	0.900408	Yes	Not assessed
9:136199675:G:A	rs34356735	QSOX2.8397.147.3	COVID_A1	8	0.949181	0.112662	0.011947	0.740714	0.4033	0.0875	4.04332e-06	-0.52428	0.52018	0.313511	Yes	Not assessed
9:136207096:G:A	rs113189561	QSOX2.8397.147.3	COVID_A1	8	0.949181	0.112662	0.011947	0.740714	0.3265	0.0709	4.12312e-06	0.99656	0.75263	0.185469	Yes	Not assessed
9:136213967:A:AAC	rs77836657	QSOX2.8397.147.3	COVID_A1	8	0.949181	0.112662	0.011947	0.740714	-0.3556	0.0238	1.77808e-50	-0.13109	0.18611	0.481203	Yes	Not assessed
9:136216078:C:T	rs78554234	QSOX2.8397.147.3	COVID_A1	8	0.949181	0.112662	0.011947	0.740714	-0.417	0.0725	8.83379e-09	-1.1306	0.33297	0.000685031	Yes	Not assessed
9:136234349:G:T	rs113703846	QSOX2.8397.147.3	COVID_A1	8	0.949181	0.112662	0.011947	0.740714	0.3625	0.0651	2.57153e-08	0.838	0.50557	0.0974113	Yes	Not assessed
9:136259042:A:C	rs34514016	QSOX2.8397.147.3	COVID_A1	8	0.949181	0.112662	0.011947	0.740714	-0.1438	0.0249	7.69072e-09	-0.098518	0.15071	0.51331	Yes	Not assessed
6:45830119:A:G	rs10948259	ENPP5.6556.5.3	COVID_B2	24	-0.0492232	0.0246254	0.0456213	0.811778	0.1378	0.0259	1.03503e-07	-0.0315	0.025652	0.219457	Yes	Not assessed
6:45848088:G:A	rs12180540	ENPP5.6556.5.3	COVID_B2	24	-0.0492232	0.0246254	0.0456213	0.811778	-0.1156	0.0257	6.85781e-06	0.013028	0.026618	0.624528	Yes	Not assessed
6:45917961:C:T	rs11758298	ENPP5.6556.5.3	COVID_B2	24	-0.0492232	0.0246254	0.0456213	0.811778	0.2356	0.0334	1.73981e-12	-0.0032569	0.036962	0.929785	Yes	Not assessed
6:45958531:A:C	rs4563714	ENPP5.6556.5.3	COVID_B2	24	-0.0492232	0.0246254	0.0456213	0.811778	0.275	0.0442	4.91736e-10	0.055743	0.037502	0.137173	Yes	Not assessed
6:45958864:A:C	rs80230088	ENPP5.6556.5.3	COVID_B2	24	-0.0492232	0.0246254	0.0456213	0.811778	-0.3435	0.0582	3.58987e-09	0.026657	0.05187	0.607308	Yes	Not assessed
6:46009471:T:C	rs62400487	ENPP5.6556.5.3	COVID_B2	24	-0.0492232	0.0246254	0.0456213	0.811778	-1.2657	0.1502	3.55355e-17	0.032193	0.19691	0.870132	Yes	Not assessed
6:46027070:A:G	rs140313527	ENPP5.6556.5.3	COVID_B2	24	-0.0492232	0.0246254	0.0456213	0.811778	-0.8576	0.1397	8.31111e-10	0.039243	0.20067	0.844955	No	Not a missense variant or in LD with missense variants
6:46049254:C:A	rs6902893	ENPP5.6556.5.3	COVID_B2	24	-0.0492232	0.0246254	0.0456213	0.811778	0.1222	0.0252	1.23956e-06	-0.061795	0.027865	0.0265783	Yes	Not assessed
6:46066630:T:G	rs946223	ENPP5.6556.5.3	COVID_B2	24	-0.0492232	0.0246254	0.0456213	0.811778	-0.2182	0.0245	5.28486e-19	0.030808	0.028155	0.273855	Yes	Not assessed
6:46135368:G:A	rs138753664	ENPP5.6556.5.3	COVID_B2	24	-0.0492232	0.0246254	0.0456213	0.811778	0.7437	0.1029	4.92309e-13	0.10056	0.14923	0.500401	Yes	Not assessed
6:46161008:C:T	rs1047153	ENPP5.6556.5.3	COVID_B2	24	-0.0492232	0.0246254	0.0456213	0.811778	-0.7891	0.0214	1.21411e-297	0.025001	0.026337	0.342482	Yes	Not assessed
6:46163088:G:T	rs77991465	ENPP5.6556.5.3	COVID_B2	24	-0.0492232	0.0246254	0.0456213	0.811778	-1.7019	0.0477	8.29642e-279	0.11571	0.055099	0.0357255	Yes	Not assessed
6:46166799:T:C	rs72860294	ENPP5.6556.5.3	COVID_B2	24	-0.0492232	0.0246254	0.0456213	0.811778	0.4655	0.095	9.58367e-07	-0.090207	0.13602	0.507209	Yes	Not assessed
6:46168657:T:C	rs76394257	ENPP5.6556.5.3	COVID_B2	24	-0.0492232	0.0246254	0.0456213	0.811778	0.4891	0.0793	6.92828e-10	-0.12005	0.082346	0.144876	Yes	Not assessed
6:46188566:AC:A	rs576784239	ENPP5.6556.5.3	COVID_B2	24	-0.0492232	0.0246254	0.0456213	0.811778	0.764	0.149	2.93589e-07	-0.33694	0.2169	0.120319	No	Not a missense variant or in LD with missense variants
6:46189121:G:C	rs727133	ENPP5.6556.5.3	COVID_B2	24	-0.0492232	0.0246254	0.0456213	0.811778	-0.1835	0.0281	6.56604e-11	-0.00032705	0.03107	0.991601	Yes	Not assessed
6:46190360:C:A	rs74918287	ENPP5.6556.5.3	COVID_B2	24	-0.0492232	0.0246254	0.0456213	0.811778	0.458	0.0846	6.17316e-08	0.03768	0.077569	0.627137	Yes	Not assessed
6:46198932:A:T	rs79959226	ENPP5.6556.5.3	COVID_B2	24	-0.0492232	0.0246254	0.0456213	0.811778	-0.2739	0.0403	1.07172e-11	0.025625	0.039167	0.512951	Yes	Not assessed
6:46221174:T:C	rs76140014	ENPP5.6556.5.3	COVID_B2	24	-0.0492232	0.0246254	0.0456213	0.811778	0.3944	0.0716	3.62151e-08	-0.013276	0.073674	0.856996	Yes	Not assessed
6:46232897:G:A	rs79715432	ENPP5.6556.5.3	COVID_B2	24	-0.0492232	0.0246254	0.0456213	0.811778	0.4428	0.0698	2.24108e-10	-0.0054437	0.070523	0.938472	Yes	Not assessed
6:46289241:T:A	rs183086357	ENPP5.6556.5.3	COVID_B2	24	-0.0492232	0.0246254	0.0456213	0.811778	0.1833	0.0329	2.52659e-08	0.040071	0.044318	0.365905	Yes	Not assessed
6:46319028:T:C	rs1009439	ENPP5.6556.5.3	COVID_B2	24	-0.0492232	0.0246254	0.0456213	0.811778	0.5584	0.0611	6.29648e-20	0.077244	0.060684	0.203057	Yes	Not assessed
6:46438574:C:T	rs62402384	ENPP5.6556.5.3	COVID_B2	24	-0.0492232	0.0246254	0.0456213	0.811778	0.3497	0.0753	3.41578e-06	-0.05014	0.10038	0.617426	Yes	Not assessed
6:46847384:C:T	rs73736668	ENPP5.6556.5.3	COVID_B2	24	-0.0492232	0.0246254	0.0456213	0.811778	-0.3182	0.0719	9.61786e-06	0.095411	0.055813	0.0873628	Yes	Not assessed
7:23035265:G:C	rs4330588	GPNMB.8606.39.3	COVID_B1	5	0.223573	0.106262	0.0353808	0.823569	0.2056	0.0436	2.41004e-06	-0.0054206	0.076905	0.943808	Yes	Not assessed
7:23230784:G:A	rs116616384	GPNMB.8606.39.3	COVID_B1	5	0.223573	0.106262	0.0353808	0.823569	-1.1486	0.2234	2.72626e-07	-0.48956	0.22623	0.0304649	Yes	Not assessed
7:23273552:T:C	rs2268748	GPNMB.8606.39.3	COVID_B1	5	0.223573	0.106262	0.0353808	0.823569	0.6868	0.0619	1.32193e-28	0.18287	0.10204	0.0731105	Yes	Not assessed
7:23299841:T:C	rs149821	GPNMB.8606.39.3	COVID_B1	5	0.223573	0.106262	0.0353808	0.823569	-0.1749	0.0247	1.43147e-12	-0.02455	0.03986	0.537957	Yes	Not assessed
7:23521031:G:T	rs117216056	GPNMB.8606.39.3	COVID_B1	5	0.223573	0.106262	0.0353808	0.823569	-0.72	0.1605	7.25791e-06	0.36075	0.30142	0.231371	Yes	Not assessed
7:145474821:T:C	rs10808033	CNTNAP2.6965.19.3	COVID_B1	8	0.232344	0.0994075	0.0194241	0.823569	0.1389	0.0282	8.41312e-07	0.051893	0.057859	0.369779	Yes	Not assessed
7:145506519:A:C	rs13231345	CNTNAP2.6965.19.3	COVID_B1	8	0.232344	0.0994075	0.0194241	0.823569	-0.1876	0.0365	2.75139e-07	0.085116	0.06867	0.215163	Yes	Not assessed
7:145553079:G:C	rs62502899	CNTNAP2.6965.19.3	COVID_B1	8	0.232344	0.0994075	0.0194241	0.823569	0.7877	0.1663	2.17311e-06	-0.039894	0.35165	0.909675	No	Not a missense variant or in LD with missense variants
7:145681495:G:C	rs10274393	CNTNAP2.6965.19.3	COVID_B1	8	0.232344	0.0994075	0.0194241	0.823569	-0.4332	0.0264	1.64652e-60	-0.11457	0.045077	0.011033	Yes	Not assessed
7:145905677:CAGAT:C	rs142526895	CNTNAP2.6965.19.3	COVID_B1	8	0.232344	0.0994075	0.0194241	0.823569	0.1175	0.026	6.20647e-06	0.11297	0.06924	0.10277	Yes	Not assessed
7:146010132:A:G	rs116895610	CNTNAP2.6965.19.3	COVID_B1	8	0.232344	0.0994075	0.0194241	0.823569	0.412	0.0835	8.05081e-07	0.24391	0.15326	0.111502	Yes	Not assessed
7:146496871:C:T	rs35652175	CNTNAP2.6965.19.3	COVID_B1	8	0.232344	0.0994075	0.0194241	0.823569	0.198	0.0436	5.59125e-06	0.040548	0.076669	0.596895	Yes	Not assessed
7:146663509:A:T	rs12669096	CNTNAP2.6965.19.3	COVID_B1	8	0.232344	0.0994075	0.0194241	0.823569	0.1398	0.031	6.49263e-06	0.014141	0.046004	0.758549	No	Not a missense variant or in LD with missense variants
17:4531155:C:T	rs61399373	GLTPD2.7948.129.3	COVID_B1	6	-0.247858	0.120078	0.0390036	0.823569	-0.6681	0.1421	2.58107e-06	-0.46912	0.42319	0.267632	Yes	Not assessed
17:4722929:C:T	rs34183984	GLTPD2.7948.129.3	COVID_B1	6	-0.247858	0.120078	0.0390036	0.823569	-0.2399	0.0484	7.17332e-07	0.027757	0.085857	0.746473	Yes	Not assessed
17:4728893:G:A	rs72824994	GLTPD2.7948.129.3	COVID_B1	6	-0.247858	0.120078	0.0390036	0.823569	0.1711	0.037	3.75821e-06	-0.0079819	0.062624	0.898578	Yes	Not assessed
17:4746797:T:C	rs17765093	GLTPD2.7948.129.3	COVID_B1	6	-0.247858	0.120078	0.0390036	0.823569	0.1536	0.0277	2.93742e-08	-0.05701	0.04608	0.216014	Yes	Not assessed
17:4764677:C:A	rs75679663	GLTPD2.7948.129.3	COVID_B1	6	-0.247858	0.120078	0.0390036	0.823569	-0.9782	0.123	1.82276e-15	0.27441	0.2102	0.191733	Yes	Not assessed
17:4781933:G:A	rs34460487	GLTPD2.7948.129.3	COVID_B1	6	-0.247858	0.120078	0.0390036	0.823569	0.2669	0.0259	6.68782e-25	-0.076158	0.045192	0.0919481	Yes	Not assessed
19:780596:G:A	rs10406309	PRTN3.13720.95.3	COVID_B1	10	0.215725	0.104228	0.0384769	0.823569	0.28	0.057	9.0023e-07	-0.012213	0.075442	0.871396	Yes	Not assessed
19:808474:G:A	rs149887681	PRTN3.13720.95.3	COVID_B1	10	0.215725	0.104228	0.0384769	0.823569	0.2315	0.0498	3.34205e-06	-0.055721	0.10342	0.590036	Yes	Not assessed
19:832508:A:G	rs182040973	PRTN3.13720.95.3	COVID_B1	10	0.215725	0.104228	0.0384769	0.823569	-0.6694	0.1274	1.48575e-07	-0.89733	0.40563	0.0269536	Yes	Not assessed
19:833153:T:A	rs111742863	PRTN3.13720.95.3	COVID_B1	10	0.215725	0.104228	0.0384769	0.823569	0.2543	0.033	1.29761e-14	0.0447	0.069043	0.517358	Yes	Not assessed
19:836043:T:C	rs10425544	PRTN3.13720.95.3	COVID_B1	10	0.215725	0.104228	0.0384769	0.823569	0.5656	0.0271	9.85682e-97	0.18933	0.070663	0.00737681	Yes	Not assessed
19:847944:G:A	rs150802678	PRTN3.13720.95.3	COVID_B1	10	0.215725	0.104228	0.0384769	0.823569	0.7439	0.1281	6.35331e-09	-0.062168	0.25288	0.805806	Yes	Not assessed
19:849959:G:A	rs351108	PRTN3.13720.95.3	COVID_B1	10	0.215725	0.104228	0.0384769	0.823569	0.2508	0.0341	1.91158e-13	-0.082198	0.07274	0.258466	Yes	Not assessed
19:856482:C:T	rs6510983	PRTN3.13720.95.3	COVID_B1	10	0.215725	0.104228	0.0384769	0.823569	-0.2343	0.0302	8.60902e-15	-0.032938	0.059896	0.582374	Yes	Not assessed
19:862912:C:T	rs3826945	PRTN3.13720.95.3	COVID_B1	10	0.215725	0.104228	0.0384769	0.823569	-0.1715	0.0275	4.47859e-10	-0.11784	0.05783	0.0415803	Yes	Not assessed
19:919009:G:A	rs116900244	PRTN3.13720.95.3	COVID_B1	10	0.215725	0.104228	0.0384769	0.823569	-0.2375	0.0388	9.29117e-10	0.071713	0.11008	0.514748	Yes	Not assessed
19:812172:C:T	rs1059714	PRTN3.3514.49.2	COVID_B1	11	0.199533	0.098413	0.0426104	0.823569	-0.6186	0.1066	6.51381e-09	-0.21079	0.26768	0.431007	Yes	Not assessed
19:832280:G:A	rs140711404	PRTN3.3514.49.2	COVID_B1	11	0.199533	0.098413	0.0426104	0.823569	-0.2462	0.0544	6.01859e-06	0.02205	0.099672	0.824917	Yes	Not assessed
19:832508:A:G	rs182040973	PRTN3.3514.49.2	COVID_B1	11	0.199533	0.098413	0.0426104	0.823569	-0.7319	0.1274	9.19764e-09	-0.89733	0.40563	0.0269536	Yes	Not assessed
19:833153:T:A	rs111742863	PRTN3.3514.49.2	COVID_B1	11	0.199533	0.098413	0.0426104	0.823569	0.2856	0.0329	3.92818e-18	0.0447	0.069043	0.517358	Yes	Not assessed
19:836043:T:C	rs10425544	PRTN3.3514.49.2	COVID_B1	11	0.199533	0.098413	0.0426104	0.823569	0.5991	0.0269	7.00188e-110	0.18933	0.070663	0.00737681	Yes	Not assessed
19:843687:C:G	rs2301878	PRTN3.3514.49.2	COVID_B1	11	0.199533	0.098413	0.0426104	0.823569	-0.342	0.0773	9.67462e-06	0.33066	0.14789	0.0253615	Yes	Not assessed
19:843822:C:T	rs116985340	PRTN3.3514.49.2	COVID_B1	11	0.199533	0.098413	0.0426104	0.823569	0.1669	0.0327	3.32591e-07	-0.061088	0.065903	0.353959	Yes	Not assessed
19:849959:G:A	rs351108	PRTN3.3514.49.2	COVID_B1	11	0.199533	0.098413	0.0426104	0.823569	0.2544	0.0341	8.62533e-14	-0.082198	0.07274	0.258466	Yes	Not assessed
19:855162:T:A	rs7250194	PRTN3.3514.49.2	COVID_B1	11	0.199533	0.098413	0.0426104	0.823569	-0.2924	0.0316	2.17943e-20	-0.019788	0.060503	0.743624	Yes	Not assessed
19:865835:T:C	rs1651896	PRTN3.3514.49.2	COVID_B1	11	0.199533	0.098413	0.0426104	0.823569	-0.132	0.0272	1.21644e-06	-0.10525	0.045163	0.0197825	Yes	Not assessed
19:933655:A:G	rs28587615	PRTN3.3514.49.2	COVID_B1	11	0.199533	0.098413	0.0426104	0.823569	-0.1306	0.0269	1.20375e-06	0.037869	0.05674	0.504509	Yes	Not assessed
9:5510644:A:G	rs16923189	PDCD1LG2.3004.67.2	COVID_B1	5	0.170992	0.0838912	0.0415235	0.823569	0.3879	0.0259	1.04057e-50	0.034958	0.042358	0.409202	Yes	Not assessed
9:5510838:A:T	rs34954342	PDCD1LG2.3004.67.2	COVID_B1	5	0.170992	0.0838912	0.0415235	0.823569	0.3614	0.03	2.01953e-33	0.10253	0.054742	0.0610728	Yes	Not assessed
9:5539537:G:A	rs10975172	PDCD1LG2.3004.67.2	COVID_B1	5	0.170992	0.0838912	0.0415235	0.823569	-0.2025	0.0435	3.2371e-06	-0.03021	0.076544	0.693083	Yes	Not assessed
9:5557708:T:C	rs7854413	PDCD1LG2.3004.67.2	COVID_B1	5	0.170992	0.0838912	0.0415235	0.823569	-0.2934	0.0425	5.07261e-12	-0.071067	0.056331	0.207094	Yes	Not assessed
9:5571105:A:G	rs41280729	PDCD1LG2.3004.67.2	COVID_B1	5	0.170992	0.0838912	0.0415235	0.823569	0.2483	0.0512	1.23705e-06	0.080985	0.093707	0.387458	Yes	Not assessed
10:88233010:C:T	rs1888641	LIPN.8097.77.3	COVID_B1	40	0.0791724	0.0380157	0.0372855	0.823569	0.1172	0.0247	2.08569e-06	-0.048083	0.039488	0.223353	Yes	Not assessed
10:88290480:G:C	rs118177025	LIPN.8097.77.3	COVID_B1	40	0.0791724	0.0380157	0.0372855	0.823569	0.5228	0.0645	5.25609e-16	0.089778	0.13158	0.495045	Yes	Not assessed
10:88291599:C:G	rs74146697	LIPN.8097.77.3	COVID_B1	40	0.0791724	0.0380157	0.0372855	0.823569	-0.3246	0.065	5.91886e-07	-0.033917	0.090417	0.707573	Yes	Not assessed
10:88334704:T:G	rs1346226	LIPN.8097.77.3	COVID_B1	40	0.0791724	0.0380157	0.0372855	0.823569	-0.1466	0.0247	2.93447e-09	-0.0047375	0.039862	0.905396	Yes	Not assessed
10:88405454:A:C	rs113874807	LIPN.8097.77.3	COVID_B1	40	0.0791724	0.0380157	0.0372855	0.823569	0.5369	0.0706	2.8531e-14	0.14204	0.14264	0.31935	Yes	Not assessed
10:88406793:T:A	rs138689948	LIPN.8097.77.3	COVID_B1	40	0.0791724	0.0380157	0.0372855	0.823569	-0.3825	0.0809	2.26676e-06	-0.28717	0.16721	0.0859022	Yes	Not assessed
10:88448987:C:T	rs10887822	LIPN.8097.77.3	COVID_B1	40	0.0791724	0.0380157	0.0372855	0.823569	-0.3601	0.0347	3.13816e-25	-0.025008	0.05264	0.634733	Yes	Not assessed
10:88520306:G:A	rs1325903	LIPN.8097.77.3	COVID_B1	40	0.0791724	0.0380157	0.0372855	0.823569	-0.2137	0.0286	7.89682e-14	0.045389	0.048707	0.351399	Yes	Not assessed
10:88542538:A:G	rs2576156	LIPN.8097.77.3	COVID_B1	40	0.0791724	0.0380157	0.0372855	0.823569	-0.6391	0.1213	1.37352e-07	0.18641	0.34035	0.583897	Yes	Not assessed
10:88624922:A:T	rs117215233	LIPN.8097.77.3	COVID_B1	40	0.0791724	0.0380157	0.0372855	0.823569	0.5216	0.1164	7.42594e-06	-0.19495	0.25821	0.450246	Yes	Not assessed
10:88662735:C:A	rs57686780	LIPN.8097.77.3	COVID_B1	40	0.0791724	0.0380157	0.0372855	0.823569	-0.517	0.0298	2.00731e-67	-0.014465	0.060142	0.809932	Yes	Not assessed
10:88677074:C:T	rs78422685	LIPN.8097.77.3	COVID_B1	40	0.0791724	0.0380157	0.0372855	0.823569	0.7591	0.1084	2.50955e-12	0.47771	0.28977	0.099233	Yes	Not assessed
10:88699811:C:T	rs151027853	LIPN.8097.77.3	COVID_B1	40	0.0791724	0.0380157	0.0372855	0.823569	1.112	0.1137	1.37044e-22	0.036025	0.25388	0.887161	Yes	Not assessed
10:88710970:G:T	rs140842984	LIPN.8097.77.3	COVID_B1	40	0.0791724	0.0380157	0.0372855	0.823569	0.7209	0.0939	1.62456e-14	0.20735	0.20875	0.320567	Yes	Not assessed
10:88716347:G:A	rs138672063	LIPN.8097.77.3	COVID_B1	40	0.0791724	0.0380157	0.0372855	0.823569	-0.8473	0.1172	4.84696e-13	-0.28512	0.21787	0.190646	Yes	Not assessed
10:88725380:T:C	rs6586151	LIPN.8097.77.3	COVID_B1	40	0.0791724	0.0380157	0.0372855	0.823569	-0.6089	0.1116	4.86725e-08	-0.16189	0.10679	0.129528	Yes	Not assessed
10:88735237:C:A	rs145540303	LIPN.8097.77.3	COVID_B1	40	0.0791724	0.0380157	0.0372855	0.823569	0.8402	0.1288	6.87808e-11	-0.0035021	0.37301	0.992509	Yes	Not assessed
10:88742657:A:T	rs17349080	LIPN.8097.77.3	COVID_B1	40	0.0791724	0.0380157	0.0372855	0.823569	-0.638	0.0695	4.31668e-20	-0.011027	0.09814	0.910538	Yes	Not assessed
10:88759433:G:A	rs74464727	LIPN.8097.77.3	COVID_B1	40	0.0791724	0.0380157	0.0372855	0.823569	-0.6134	0.056	6.38783e-28	0.045154	0.095008	0.634598	Yes	Not assessed
10:88766035:C:T	rs10509554	LIPN.8097.77.3	COVID_B1	40	0.0791724	0.0380157	0.0372855	0.823569	1.0165	0.0213	0	0.082159	0.043947	0.061553	Yes	Not assessed
10:88769466:A:G	rs79261067	LIPN.8097.77.3	COVID_B1	40	0.0791724	0.0380157	0.0372855	0.823569	0.9995	0.0963	3.08917e-25	0.059801	0.1465	0.683128	Yes	Not assessed
10:88777048:T:G	rs303482	LIPN.8097.77.3	COVID_B1	40	0.0791724	0.0380157	0.0372855	0.823569	-0.5552	0.0918	1.46718e-09	-0.046915	0.20287	0.817116	Yes	Not assessed
10:88782301:C:T	rs79856860	LIPN.8097.77.3	COVID_B1	40	0.0791724	0.0380157	0.0372855	0.823569	-0.5958	0.0563	3.58885e-26	-0.071077	0.10579	0.501667	Yes	Not assessed
10:88788644:C:T	rs58092908	LIPN.8097.77.3	COVID_B1	40	0.0791724	0.0380157	0.0372855	0.823569	-0.6569	0.1165	1.71412e-08	-0.13988	0.10915	0.200004	Yes	Not assessed
10:88801146:C:T	rs148190505	LIPN.8097.77.3	COVID_B1	40	0.0791724	0.0380157	0.0372855	0.823569	-0.6479	0.1306	7.01494e-07	-0.21864	0.25519	0.39157	Yes	Not assessed
10:88807549:G:A	rs3979140	LIPN.8097.77.3	COVID_B1	40	0.0791724	0.0380157	0.0372855	0.823569	-0.5579	0.0255	4.16939e-106	-0.0033393	0.052131	0.948926	Yes	Not assessed
10:88812844:C:T	rs182064879	LIPN.8097.77.3	COVID_B1	40	0.0791724	0.0380157	0.0372855	0.823569	-0.5785	0.0929	4.75069e-10	0.1949	0.18346	0.288074	Yes	Not assessed
10:88818090:G:A	rs72807379	LIPN.8097.77.3	COVID_B1	40	0.0791724	0.0380157	0.0372855	0.823569	0.5497	0.0843	6.99524e-11	0.029061	0.17874	0.870843	Yes	Not assessed
10:88828397:A:G	rs1977537	LIPN.8097.77.3	COVID_B1	40	0.0791724	0.0380157	0.0372855	0.823569	-0.3655	0.0295	2.9667e-35	0.054675	0.052788	0.30032	Yes	Not assessed
10:88829306:G:A	rs138961480	LIPN.8097.77.3	COVID_B1	40	0.0791724	0.0380157	0.0372855	0.823569	-0.966	0.1552	4.83937e-10	0.75986	0.38407	0.0478789	No	Not a missense variant or in LD with missense variants
10:88832379:T:C	rs145014328	LIPN.8097.77.3	COVID_B1	40	0.0791724	0.0380157	0.0372855	0.823569	-0.4876	0.0615	2.21889e-15	-0.057201	0.10584	0.588888	Yes	Not assessed
10:88845808:G:A	rs72807396	LIPN.8097.77.3	COVID_B1	40	0.0791724	0.0380157	0.0372855	0.823569	-0.3412	0.0748	5.07901e-06	-0.063626	0.15335	0.67821	Yes	Not assessed
10:88848481:A:G	rs1147601	LIPN.8097.77.3	COVID_B1	40	0.0791724	0.0380157	0.0372855	0.823569	0.1901	0.0288	4.09236e-11	0.010594	0.050449	0.833672	Yes	Not assessed
10:88859875:G:A	rs7911106	LIPN.8097.77.3	COVID_B1	40	0.0791724	0.0380157	0.0372855	0.823569	-0.3945	0.0414	1.58828e-21	0.026667	0.063848	0.676193	Yes	Not assessed
10:88868693:A:T	rs187671346	LIPN.8097.77.3	COVID_B1	40	0.0791724	0.0380157	0.0372855	0.823569	0.7439	0.1433	2.08935e-07	-0.10044	0.35285	0.77591	No	Not a missense variant or in LD with missense variants
10:88910507:A:C	rs149637846	LIPN.8097.77.3	COVID_B1	40	0.0791724	0.0380157	0.0372855	0.823569	1.0792	0.1741	5.69183e-10	-0.40576	0.38797	0.295628	No	Not a missense variant or in LD with missense variants
10:88910845:T:A	rs142109544	LIPN.8097.77.3	COVID_B1	40	0.0791724	0.0380157	0.0372855	0.823569	-0.7636	0.1375	2.80079e-08	-0.53194	0.27696	0.0547773	Yes	Not assessed
10:89126826:C:A	rs77301006	LIPN.8097.77.3	COVID_B1	40	0.0791724	0.0380157	0.0372855	0.823569	0.664	0.1456	5.10467e-06	0.69274	0.33333	0.0376872	Yes	Not assessed
10:89221804:A:G	rs10509568	LIPN.8097.77.3	COVID_B1	40	0.0791724	0.0380157	0.0372855	0.823569	-0.1717	0.0344	5.99808e-07	-0.037391	0.053967	0.488404	Yes	Not assessed
10:89253532:T:C	rs111445995	LIPN.8097.77.3	COVID_B1	40	0.0791724	0.0380157	0.0372855	0.823569	0.6938	0.1358	3.23896e-07	0.41625	0.31537	0.186876	Yes	Not assessed
19:780596:G:A	rs10406309	PRTN3.13720.95.3	COVID_A1	10	0.733279	0.104228	0.0384769	0.823569	0.28	0.057	9.0023e-07	-0.30669	0.40035	0.443644	Yes	Not assessed
19:808474:G:A	rs149887681	PRTN3.13720.95.3	COVID_A1	10	0.733279	0.104228	0.0384769	0.823569	0.2315	0.0498	3.34205e-06	0.069122	0.33587	0.836947	Yes	Not assessed
19:833153:T:A	rs111742863	PRTN3.13720.95.3	COVID_A1	10	0.733279	0.104228	0.0384769	0.823569	0.2543	0.033	1.29761e-14	0.064763	0.20011	0.746213	Yes	Not assessed
19:836043:T:C	rs10425544	PRTN3.13720.95.3	COVID_A1	10	0.733279	0.104228	0.0384769	0.823569	0.5656	0.0271	9.85682e-97	0.75667	0.20333	0.00019813	Yes	Not assessed
19:847944:G:A	rs150802678	PRTN3.13720.95.3	COVID_A1	10	0.733279	0.104228	0.0384769	0.823569	0.7439	0.1281	6.35331e-09	-0.27	0.63107	0.668764	Yes	Not assessed
19:849959:G:A	rs351108	PRTN3.13720.95.3	COVID_A1	10	0.733279	0.104228	0.0384769	0.823569	0.2508	0.0341	1.91158e-13	-0.6041	0.20491	0.00319709	Yes	Not assessed
19:856482:C:T	rs6510983	PRTN3.13720.95.3	COVID_A1	10	0.733279	0.104228	0.0384769	0.823569	-0.2343	0.0302	8.60902e-15	-0.1441	0.18635	0.439359	Yes	Not assessed
19:862912:C:T	rs3826945	PRTN3.13720.95.3	COVID_A1	10	0.733279	0.104228	0.0384769	0.823569	-0.1715	0.0275	4.47859e-10	-0.12775	0.15916	0.422176	Yes	Not assessed
19:934373:G:A	rs350153	PRTN3.13720.95.3	COVID_A1	10	0.733279	0.104228	0.0384769	0.823569	-0.1569	0.0333	2.45645e-06	-0.028967	0.23934	0.903668	Yes	Not assessed
19:832280:G:A	rs140711404	PRTN3.3514.49.2	COVID_A1	11	0.658492	0.098413	0.0426104	0.823569	-0.2462	0.0544	6.01859e-06	0.089551	0.30991	0.772613	Yes	Not assessed
19:833153:T:A	rs111742863	PRTN3.3514.49.2	COVID_A1	11	0.658492	0.098413	0.0426104	0.823569	0.2856	0.0329	3.92818e-18	0.064763	0.20011	0.746213	Yes	Not assessed
19:836043:T:C	rs10425544	PRTN3.3514.49.2	COVID_A1	11	0.658492	0.098413	0.0426104	0.823569	0.5991	0.0269	7.00188e-110	0.75667	0.20333	0.00019813	Yes	Not assessed
19:843687:C:G	rs2301878	PRTN3.3514.49.2	COVID_A1	11	0.658492	0.098413	0.0426104	0.823569	-0.342	0.0773	9.67462e-06	0.25139	0.37584	0.503575	Yes	Not assessed
19:843822:C:T	rs116985340	PRTN3.3514.49.2	COVID_A1	11	0.658492	0.098413	0.0426104	0.823569	0.1669	0.0327	3.32591e-07	0.15026	0.20196	0.456871	Yes	Not assessed
19:849959:G:A	rs351108	PRTN3.3514.49.2	COVID_A1	11	0.658492	0.098413	0.0426104	0.823569	0.2544	0.0341	8.62533e-14	-0.6041	0.20491	0.00319709	Yes	Not assessed
19:855162:T:A	rs7250194	PRTN3.3514.49.2	COVID_A1	11	0.658492	0.098413	0.0426104	0.823569	-0.2924	0.0316	2.17943e-20	-0.14731	0.18546	0.427024	Yes	Not assessed
19:865835:T:C	rs1651896	PRTN3.3514.49.2	COVID_A1	11	0.658492	0.098413	0.0426104	0.823569	-0.132	0.0272	1.21644e-06	-0.049508	0.15698	0.752475	Yes	Not assessed
19:933655:A:G	rs28587615	PRTN3.3514.49.2	COVID_A1	11	0.658492	0.098413	0.0426104	0.823569	-0.1306	0.0269	1.20375e-06	0.12986	0.16465	0.430285	Yes	Not assessed
16:69515685:C:T	rs74325711	NQO1.9837.60.3	COVID_C2	20	-0.0397186	0.0185282	0.0320585	0.832786	0.3668	0.0387	2.59113e-21	-0.018348	0.020592	0.372915	Yes	Not assessed
16:69567760:T:G	rs185392254	NQO1.9837.60.3	COVID_C2	20	-0.0397186	0.0185282	0.0320585	0.832786	-0.9317	0.1694	3.79791e-08	0.08024	0.11333	0.478932	No	Not a missense variant or in LD with missense variants
16:69617954:CG:C	rs549460104	NQO1.9837.60.3	COVID_C2	20	-0.0397186	0.0185282	0.0320585	0.832786	0.2762	0.0407	1.15093e-11	-0.041486	0.027434	0.13048	Yes	Not assessed
16:69659135:T:A	rs72783107	NQO1.9837.60.3	COVID_C2	20	-0.0397186	0.0185282	0.0320585	0.832786	0.1935	0.0417	3.47924e-06	-0.031473	0.033945	0.353835	Yes	Not assessed
16:69682266:T:C	rs146818663	NQO1.9837.60.3	COVID_C2	20	-0.0397186	0.0185282	0.0320585	0.832786	-0.7696	0.1108	3.76193e-12	0.10833	0.1209	0.370237	Yes	Not assessed
16:69702948:G:A	rs12232410	NQO1.9837.60.3	COVID_C2	20	-0.0397186	0.0185282	0.0320585	0.832786	-0.7499	0.0283	1.01576e-154	0.027313	0.015086	0.0702204	Yes	Not assessed
16:69711598:C:T	rs117363962	NQO1.9837.60.3	COVID_C2	20	-0.0397186	0.0185282	0.0320585	0.832786	-0.6535	0.1171	2.39552e-08	0.22961	0.089376	0.0101982	Yes	Not assessed
16:69723076:C:T	rs555135666	NQO1.9837.60.3	COVID_C2	20	-0.0397186	0.0185282	0.0320585	0.832786	-0.7842	0.1448	6.10337e-08	0.086665	0.12172	0.476463	Yes	Not assessed
16:69761420:A:T	rs56140069	NQO1.9837.60.3	COVID_C2	20	-0.0397186	0.0185282	0.0320585	0.832786	0.1975	0.0321	7.61998e-10	-0.0083632	0.020074	0.676957	Yes	Not assessed
16:69836054:C:T	rs145297356	NQO1.9837.60.3	COVID_C2	20	-0.0397186	0.0185282	0.0320585	0.832786	-0.6121	0.1204	3.69788e-07	-0.039074	0.081518	0.631704	Yes	Not assessed
16:69853786:A:T	rs75920310	NQO1.9837.60.3	COVID_C2	20	-0.0397186	0.0185282	0.0320585	0.832786	-0.4708	0.0634	1.12043e-13	0.038004	0.03426	0.267309	Yes	Not assessed
16:69880589:A:T	rs182741457	NQO1.9837.60.3	COVID_C2	20	-0.0397186	0.0185282	0.0320585	0.832786	-0.7172	0.1388	2.37694e-07	0.09354	0.1118	0.402777	Yes	Not assessed
16:69938583:T:A	rs9302605	NQO1.9837.60.3	COVID_C2	20	-0.0397186	0.0185282	0.0320585	0.832786	-0.1924	0.0297	9.28759e-11	0.0091654	0.020824	0.659838	Yes	Not assessed
16:70232193:T:C	rs145087140	NQO1.9837.60.3	COVID_C2	20	-0.0397186	0.0185282	0.0320585	0.832786	-0.5812	0.0975	2.5066e-09	-0.12074	0.084964	0.155296	Yes	Not assessed
16:70335022:T:C	rs117884257	NQO1.9837.60.3	COVID_C2	20	-0.0397186	0.0185282	0.0320585	0.832786	-0.6479	0.1448	7.66091e-06	-0.16304	0.13225	0.217644	Yes	Not assessed
16:70451879:C:T	rs149300580	NQO1.9837.60.3	COVID_C2	20	-0.0397186	0.0185282	0.0320585	0.832786	-0.4799	0.0854	1.9158e-08	0.077791	0.089624	0.38541	Yes	Not assessed
16:70481697:T:G	rs6416698	NQO1.9837.60.3	COVID_C2	20	-0.0397186	0.0185282	0.0320585	0.832786	0.1834	0.0252	3.39364e-13	-0.018539	0.016436	0.259341	Yes	Not assessed
16:70627062:A:G	rs145630960	NQO1.9837.60.3	COVID_C2	20	-0.0397186	0.0185282	0.0320585	0.832786	-0.6896	0.133	2.16058e-07	0.12896	0.10589	0.223274	Yes	Not assessed
16:70660097:C:A	rs4985556	NQO1.9837.60.3	COVID_C2	20	-0.0397186	0.0185282	0.0320585	0.832786	0.2159	0.0376	9.35531e-09	0.021703	0.021536	0.313572	Yes	Not assessed
16:70692673:G:T	rs192139454	NQO1.9837.60.3	COVID_C2	20	-0.0397186	0.0185282	0.0320585	0.832786	-0.3047	0.044	4.35976e-12	-0.0028787	0.030816	0.925573	Yes	Not assessed
3:53576936:G:A	rs115697371	IL17RB.5084.154.3	COVID_C1	8	0.0704399	0.0320472	0.0279487	0.956467	0.2288	0.0432	1.18175e-07	-0.0089032	0.030364	0.769357	Yes	Not assessed
3:53768921:C:A	rs114702541	IL17RB.5084.154.3	COVID_C1	8	0.0704399	0.0320472	0.0279487	0.956467	0.562	0.0927	1.33966e-09	0.0335	0.064204	0.601827	Yes	Not assessed
3:53777279:G:A	rs3774586	IL17RB.5084.154.3	COVID_C1	8	0.0704399	0.0320472	0.0279487	0.956467	0.1408	0.0259	5.44003e-08	0.01594	0.01612	0.322744	Yes	Not assessed
3:53790637:G:A	rs35187993	IL17RB.5084.154.3	COVID_C1	8	0.0704399	0.0320472	0.0279487	0.956467	0.3104	0.066	2.56328e-06	0.021012	0.047389	0.657481	Yes	Not assessed
3:53848634:A:G	rs2232333	IL17RB.5084.154.3	COVID_C1	8	0.0704399	0.0320472	0.0279487	0.956467	0.4192	0.0257	8.20497e-60	0.041462	0.017796	0.0198141	Yes	Not assessed
3:53858803:T:C	rs2232346	IL17RB.5084.154.3	COVID_C1	8	0.0704399	0.0320472	0.0279487	0.956467	1.1818	0.0636	4.51445e-77	0.05087	0.049664	0.305702	Yes	Not assessed
3:53884828:G:C	rs9878461	IL17RB.5084.154.3	COVID_C1	8	0.0704399	0.0320472	0.0279487	0.956467	-0.2264	0.0401	1.64333e-08	-0.027026	0.024738	0.274618	Yes	Not assessed
3:54168901:C:G	rs73085918	IL17RB.5084.154.3	COVID_C1	8	0.0704399	0.0320472	0.0279487	0.956467	0.85	0.1468	7.03065e-09	0.10238	0.15548	0.510232	No	Not a missense variant or in LD with missense variants
1:161086424:G:C	rs12410477	FCGR2B.3310.62.1	COVID_C1	44	0.0354149	0.0156387	0.0235387	0.956467	-0.2163	0.0431	5.20598e-07	-0.080906	0.029453	0.00601518	Yes	Not assessed
1:161183606:C:T	rs145282062	FCGR2B.3310.62.1	COVID_C1	44	0.0354149	0.0156387	0.0235387	0.956467	-0.2314	0.0484	1.74433e-06	-0.035511	0.034737	0.306648	Yes	Not assessed
1:161233981:A:T	rs149151778	FCGR2B.3310.62.1	COVID_C1	44	0.0354149	0.0156387	0.0235387	0.956467	0.3535	0.0795	8.72641e-06	0.10085	0.06425	0.116497	Yes	Not assessed
1:161240743:C:T	rs186663604	FCGR2B.3310.62.1	COVID_C1	44	0.0354149	0.0156387	0.0235387	0.956467	0.4306	0.0662	7.79358e-11	-0.0013277	0.052752	0.97992	Yes	Not assessed
1:161256950:C:T	rs116659856	FCGR2B.3310.62.1	COVID_C1	44	0.0354149	0.0156387	0.0235387	0.956467	0.6859	0.1302	1.37881e-07	0.12565	0.14364	0.381707	Yes	Not assessed
1:161260983:A:G	rs150752639	FCGR2B.3310.62.1	COVID_C1	44	0.0354149	0.0156387	0.0235387	0.956467	0.3514	0.0667	1.37644e-07	0.049648	0.048133	0.302318	Yes	Not assessed
1:161263237:GTTTTTGTTTTTT:G	rs147957868	FCGR2B.3310.62.1	COVID_C1	44	0.0354149	0.0156387	0.0235387	0.956467	-0.1933	0.0404	1.71283e-06	-0.015584	0.042304	0.712589	Yes	Not assessed
1:161287569:G:A	rs6656438	FCGR2B.3310.62.1	COVID_C1	44	0.0354149	0.0156387	0.0235387	0.956467	0.2244	0.0394	1.2306e-08	-0.014435	0.027373	0.597954	Yes	Not assessed
1:161300146:C:T	rs142255949	FCGR2B.3310.62.1	COVID_C1	44	0.0354149	0.0156387	0.0235387	0.956467	0.5072	0.1015	5.82157e-07	0.002829	0.086567	0.97393	Yes	Not assessed
1:161305681:C:A	rs150182811	FCGR2B.3310.62.1	COVID_C1	44	0.0354149	0.0156387	0.0235387	0.956467	0.6603	0.1115	3.18102e-09	0.097115	0.095432	0.308851	Yes	Not assessed
1:161339449:C:T	rs115605940	FCGR2B.3310.62.1	COVID_C1	44	0.0354149	0.0156387	0.0235387	0.956467	-0.4106	0.0646	2.07025e-10	0.00030448	0.042841	0.994329	Yes	Not assessed
1:161362517:G:C	rs201210474	FCGR2B.3310.62.1	COVID_C1	44	0.0354149	0.0156387	0.0235387	0.956467	-0.6315	0.1047	1.62426e-09	-0.043309	0.10215	0.671584	Yes	Not assessed
1:161405420:G:C	rs112252354	FCGR2B.3310.62.1	COVID_C1	44	0.0354149	0.0156387	0.0235387	0.956467	-0.377	0.0616	9.34991e-10	0.0025695	0.045734	0.955196	Yes	Not assessed
1:161419170:T:C	rs4326638	FCGR2B.3310.62.1	COVID_C1	44	0.0354149	0.0156387	0.0235387	0.956467	-0.3704	0.0243	1.83826e-52	-0.027246	0.015609	0.0808924	Yes	Not assessed
1:161438667:TTAAG:T	rs541041100	FCGR2B.3310.62.1	COVID_C1	44	0.0354149	0.0156387	0.0235387	0.956467	1.1658	0.1799	9.15606e-11	-0.23479	0.22268	0.291708	No	Not a missense variant or in LD with missense variants
1:161440388:C:A	rs180854462	FCGR2B.3310.62.1	COVID_C1	44	0.0354149	0.0156387	0.0235387	0.956467	-0.3869	0.0635	1.10874e-09	-0.14086	0.082919	0.0893632	Yes	Not assessed
1:161494119:G:A	rs150629305	FCGR2B.3310.62.1	COVID_C1	44	0.0354149	0.0156387	0.0235387	0.956467	-0.8272	0.1299	1.9154e-10	-0.10162	0.13631	0.455966	Yes	Not assessed
1:161498640:C:T	rs114797774	FCGR2B.3310.62.1	COVID_C1	44	0.0354149	0.0156387	0.0235387	0.956467	0.9165	0.0876	1.28654e-25	-0.054651	0.067019	0.414812	Yes	Not assessed
1:161502999:C:A	rs10800314	FCGR2B.3310.62.1	COVID_C1	44	0.0354149	0.0156387	0.0235387	0.956467	0.6669	0.0238	9.01374e-173	0.054058	0.030147	0.0729494	Yes	Not assessed
1:161505324:C:G	rs72717028	FCGR2B.3310.62.1	COVID_C1	44	0.0354149	0.0156387	0.0235387	0.956467	-0.6113	0.1046	5.09105e-09	0.025477	0.074066	0.730864	Yes	Not assessed
1:161511740:G:A	rs113590334	FCGR2B.3310.62.1	COVID_C1	44	0.0354149	0.0156387	0.0235387	0.956467	-0.3988	0.0619	1.17406e-10	-0.03377	0.043282	0.435254	Yes	Not assessed
1:161532142:G:A	rs115264949	FCGR2B.3310.62.1	COVID_C1	44	0.0354149	0.0156387	0.0235387	0.956467	1.1332	0.098	6.32568e-31	0.062824	0.072485	0.386097	Yes	Not assessed
1:161537659:G:C	rs151061115	FCGR2B.3310.62.1	COVID_C1	44	0.0354149	0.0156387	0.0235387	0.956467	0.3023	0.0578	1.69415e-07	0.0434	0.048499	0.37086	Yes	Not assessed
1:161544666:C:T	rs144672514	FCGR2B.3310.62.1	COVID_C1	44	0.0354149	0.0156387	0.0235387	0.956467	1.0232	0.1016	7.43207e-24	0.031684	0.086345	0.713659	Yes	Not assessed
1:161594602:T:C	rs115987345	FCGR2B.3310.62.1	COVID_C1	44	0.0354149	0.0156387	0.0235387	0.956467	0.9993	0.1203	9.83728e-17	-0.061496	0.12977	0.635582	Yes	Not assessed
1:161595618:T:C	rs114010589	FCGR2B.3310.62.1	COVID_C1	44	0.0354149	0.0156387	0.0235387	0.956467	-0.4023	0.0466	5.97388e-18	-0.038144	0.03539	0.281115	Yes	Not assessed
1:161599779:C:T	rs138731942	FCGR2B.3310.62.1	COVID_C1	44	0.0354149	0.0156387	0.0235387	0.956467	-0.3368	0.0356	3.05964e-21	-0.012328	0.039704	0.756183	Yes	Not assessed
1:161611879:T:C	rs549425051	FCGR2B.3310.62.1	COVID_C1	44	0.0354149	0.0156387	0.0235387	0.956467	0.7923	0.1668	2.03417e-06	-0.26664	0.20449	0.192259	No	Not a missense variant or in LD with missense variants
1:161626660:A:C	rs573255358	FCGR2B.3310.62.1	COVID_C1	44	0.0354149	0.0156387	0.0235387	0.956467	1.1863	0.1401	2.50666e-17	0.35871	0.13059	0.00601723	No	Not a missense variant or in LD with missense variants
1:161653235:G:C	rs61804164	FCGR2B.3310.62.1	COVID_C1	44	0.0354149	0.0156387	0.0235387	0.956467	-0.455	0.0371	1.41083e-34	0.015565	0.033367	0.640873	Yes	Not assessed
1:161671594:G:A	rs6665610	FCGR2B.3310.62.1	COVID_C1	44	0.0354149	0.0156387	0.0235387	0.956467	1.3308	0.0224	0	0.029505	0.023481	0.208917	Yes	Not assessed
1:161676336:C:T	rs112305056	FCGR2B.3310.62.1	COVID_C1	44	0.0354149	0.0156387	0.0235387	0.956467	1.0296	0.1542	2.43812e-11	0.032292	0.17299	0.85192	No	Not a missense variant or in LD with missense variants
1:161682517:C:T	rs111528110	FCGR2B.3310.62.1	COVID_C1	44	0.0354149	0.0156387	0.0235387	0.956467	0.8011	0.0627	2.21219e-37	0.027841	0.033113	0.400467	Yes	Not assessed
1:161683325:C:T	rs141350127	FCGR2B.3310.62.1	COVID_C1	44	0.0354149	0.0156387	0.0235387	0.956467	1.2534	0.1353	1.97176e-20	0.014394	0.13085	0.912406	Yes	Not assessed
1:161689950:T:C	rs148824583	FCGR2B.3310.62.1	COVID_C1	44	0.0354149	0.0156387	0.0235387	0.956467	-0.6665	0.076	1.79084e-18	-0.037838	0.058559	0.518181	Yes	Not assessed
1:161692882:A:C	rs114883413	FCGR2B.3310.62.1	COVID_C1	44	0.0354149	0.0156387	0.0235387	0.956467	1.06	0.105	5.79902e-24	0.041654	0.12076	0.730145	Yes	Not assessed
1:161705577:A:T	rs12036723	FCGR2B.3310.62.1	COVID_C1	44	0.0354149	0.0156387	0.0235387	0.956467	-0.2626	0.052	4.4181e-07	0.0069869	0.049548	0.88786	Yes	Not assessed
1:161710468:G:A	rs6427618	FCGR2B.3310.62.1	COVID_C1	44	0.0354149	0.0156387	0.0235387	0.956467	0.1814	0.0254	9.2162e-13	-0.0054452	0.015879	0.73166	Yes	Not assessed
1:161724126:A:G	rs6696500	FCGR2B.3310.62.1	COVID_C1	44	0.0354149	0.0156387	0.0235387	0.956467	0.4261	0.038	3.51427e-29	0.015931	0.022961	0.48779	Yes	Not assessed
1:161744943:G:T	rs115291212	FCGR2B.3310.62.1	COVID_C1	44	0.0354149	0.0156387	0.0235387	0.956467	-0.436	0.0554	3.54539e-15	-0.08649	0.036529	0.0178987	Yes	Not assessed
1:161912399:G:A	rs72708088	FCGR2B.3310.62.1	COVID_C1	44	0.0354149	0.0156387	0.0235387	0.956467	-0.3622	0.0713	3.77546e-07	0.016304	0.055257	0.76795	Yes	Not assessed
1:161972701:C:G	rs4656342	FCGR2B.3310.62.1	COVID_C1	44	0.0354149	0.0156387	0.0235387	0.956467	0.2535	0.0286	7.74461e-19	0.0038662	0.018207	0.831836	Yes	Not assessed
1:161985985:G:A	rs10918374	FCGR2B.3310.62.1	COVID_C1	44	0.0354149	0.0156387	0.0235387	0.956467	0.2814	0.0288	1.50211e-22	-9.2144e-05	0.018104	0.995939	Yes	Not assessed
1:162006683:G:A	rs12093822	FCGR2B.3310.62.1	COVID_C1	44	0.0354149	0.0156387	0.0235387	0.956467	0.2217	0.0413	7.95975e-08	0.033981	0.025087	0.175569	Yes	Not assessed
9:91778765:T:C	rs10992094	ASPN.6451.64.3	COVID_C1	15	-0.0722408	0.0307561	0.0188325	0.956467	0.193	0.0362	9.74093e-08	-0.030388	0.022151	0.170108	Yes	Not assessed
9:91970422:C:T	rs139581125	ASPN.6451.64.3	COVID_C1	15	-0.0722408	0.0307561	0.0188325	0.956467	-0.4297	0.0745	8.03201e-09	-0.07474	0.053685	0.163863	Yes	Not assessed
9:92003744:C:T	rs61246786	ASPN.6451.64.3	COVID_C1	15	-0.0722408	0.0307561	0.0188325	0.956467	-0.4325	0.076	1.26453e-08	0.080132	0.031498	0.010958	Yes	Not assessed
9:92032020:T:C	rs7944	ASPN.6451.64.3	COVID_C1	15	-0.0722408	0.0307561	0.0188325	0.956467	-0.3732	0.0507	1.8261e-13	-0.0058755	0.033918	0.862473	Yes	Not assessed
9:92264426:T:A	rs139365191	ASPN.6451.64.3	COVID_C1	15	-0.0722408	0.0307561	0.0188325	0.956467	-0.4626	0.0947	1.03482e-06	-0.063046	0.073139	0.388686	Yes	Not assessed
9:92284377:G:C	rs78155973	ASPN.6451.64.3	COVID_C1	15	-0.0722408	0.0307561	0.0188325	0.956467	0.3288	0.0431	2.37003e-14	-0.042239	0.035805	0.238121	Yes	Not assessed
9:92307309:G:A	rs75149413	ASPN.6451.64.3	COVID_C1	15	-0.0722408	0.0307561	0.0188325	0.956467	-0.7905	0.101	5.00712e-15	0.044936	0.075467	0.55155	Yes	Not assessed
9:92367311:G:C	rs112730655	ASPN.6451.64.3	COVID_C1	15	-0.0722408	0.0307561	0.0188325	0.956467	0.4238	0.062	8.17287e-12	-0.023811	0.039871	0.550373	Yes	Not assessed
9:92380989:A:C	rs62566405	ASPN.6451.64.3	COVID_C1	15	-0.0722408	0.0307561	0.0188325	0.956467	-0.4177	0.0858	1.12563e-06	-0.041648	0.065318	0.523722	Yes	Not assessed
9:92425098:A:T	rs2516568	ASPN.6451.64.3	COVID_C1	15	-0.0722408	0.0307561	0.0188325	0.956467	-0.4724	0.025	1.23034e-79	0.022436	0.019479	0.249401	Yes	Not assessed
9:92451647:A:G	rs564507908	ASPN.6451.64.3	COVID_C1	15	-0.0722408	0.0307561	0.0188325	0.956467	0.362	0.0563	1.27738e-10	-0.0010426	0.048366	0.982802	Yes	Not assessed
[truncated: 243 more rows]
