# Supplementary material for: A proteome-wide genetic investigation identifies several SARS-CoV-2-exploited host targets of clinical relevance
Source: eLife. 2021 Aug 17;10:e69719. doi: 10.7554/eLife.69719 (PMC8457835; doi:10.7554/eLife.69719)
Supplement: Supplementary file 5. [file elife-69719-supp5.xlsx]

## Sheet: Sheet1
Evaluation of pan-MR association of protein probes that have passed the 5% FDR
probe	nSNPs	outcome	nCases	mr_beta	mr_se	mr_p
ABO_9253	21	Very severe respiratory confirmed covid vs not hospitalised covid	269	-0.167629	0.135416	0.215759
ABO_9253	23	Very severe respiratory confirmed covid vs. population	4336	0.128816	0.0299982	1.75369e-05
ABO_9253	23	Hospitalized covid vs. not hospitalized covid	2430	-0.0301212	0.0356272	0.397856
ABO_9253	23	Hospitalized covid vs. population	7885	0.115192	0.0200604	9.34177e-09
ABO_9253	24	Covid vs. lab/self-reported negative	11085	0.065711	0.0145295	6.10862e-06		Legend
ABO_9253	23	Covid vs. population	17965	0.0746665	0.0120412	5.61273e-10		probe	protein probe used by SomaLogic to quantify protein abundance
ABO_9253	21	Predicted covid from self-reported symptoms vs. predicted or self-reported non-covid	3204	0.0524119	0.0273694	0.055495		outcome	COVID outcome (for definitions, see COVID_definitions)
ADGRF5_6409	16	Very severe respiratory confirmed covid vs not hospitalised covid	269	-0.0741254	0.149608	0.620273		nCases	Number of cases
ADGRF5_6409	14	Very severe respiratory confirmed covid vs. population	4336	-0.149484	0.0411488	0.00028039		mr_beta	Wald ratio representing per coloc_snp alt allele beta of right_trait divided by coloc_snp per alt allele beta of left_trait
ADGRF5_6409	16	Hospitalized covid vs. not hospitalized covid	2430	0.0425596	0.0363086	0.241132		mr_se	standard error of mr_beta
ADGRF5_6409	15	Hospitalized covid vs. population	7885	-0.00718493	0.0210173	0.732458		mr_p	p-value of mr_beta
ADGRF5_6409	15	Covid vs. lab/self-reported negative	11085	0.00196135	0.0149732	0.895783
ADGRF5_6409	15	Covid vs. population	17965	-0.00652676	0.0124327	0.599607
ADGRF5_6409	17	Predicted covid from self-reported symptoms vs. predicted or self-reported non-covid	3204	0.00138541	0.0309259	0.964268
CD209_3029	13	Very severe respiratory confirmed covid vs not hospitalised covid	269	-0.163507	0.181723	0.368249
CD209_3029	13	Very severe respiratory confirmed covid vs. population	4336	0.177386	0.043436	4.42973e-05
CD209_3029	14	Hospitalized covid vs. not hospitalized covid	2430	-0.0102729	0.0515351	0.841999
CD209_3029	13	Hospitalized covid vs. population	7885	0.167509	0.0297712	1.83849e-08
CD209_3029	14	Covid vs. lab/self-reported negative	11085	0.100316	0.021036	1.85347e-06
CD209_3029	13	Covid vs. population	17965	0.105882	0.0174377	1.26308e-09
CD209_3029	13	Predicted covid from self-reported symptoms vs. predicted or self-reported non-covid	3204	0.0469461	0.0389895	0.228562
FAM3D_13102	12	Very severe respiratory confirmed covid vs not hospitalised covid	269	0.040632	0.171343	0.812549
FAM3D_13102	13	Very severe respiratory confirmed covid vs. population	4336	0.141865	0.0353804	6.07966e-05
FAM3D_13102	12	Hospitalized covid vs. not hospitalized covid	2430	0.0301814	0.0480917	0.530279
FAM3D_13102	13	Hospitalized covid vs. population	7885	0.102526	0.0259328	7.70081e-05
FAM3D_13102	13	Covid vs. lab/self-reported negative	11085	0.074991	0.0194912	0.000119367
FAM3D_13102	13	Covid vs. population	17965	0.0673596	0.0159568	2.42831e-05
FAM3D_13102	12	Predicted covid from self-reported symptoms vs. predicted or self-reported non-covid	3204	0.00835368	0.0347702	0.810133
ICAM1_4342_10	25	Very severe respiratory confirmed covid vs not hospitalised covid	269	0.233599	0.123338	0.0582287
ICAM1_4342_10	23	Very severe respiratory confirmed covid vs. population	4336	0.081848	0.0226276	0.00029783
ICAM1_4342_10	25	Hospitalized covid vs. not hospitalized covid	2430	0.0663107	0.0328168	0.0433179
ICAM1_4342_10	24	Hospitalized covid vs. population	7885	0.0448446	0.0171802	0.0090476
ICAM1_4342_10	26	Covid vs. lab/self-reported negative	11085	-0.0116189	0.0127872	0.363545
ICAM1_4342_10	24	Covid vs. population	17965	0.014943	0.0105368	0.156143
ICAM1_4342_10	26	Predicted covid from self-reported symptoms vs. predicted or self-reported non-covid	3204	-0.00594054	0.0216048	0.783344
IL6R_8092_29	26	Very severe respiratory confirmed covid vs not hospitalised covid	269	-0.0875662	0.129254	0.498107
IL6R_8092_29	31	Very severe respiratory confirmed covid vs. population	4336	-0.0476108	0.0251012	0.0578603
IL6R_8092_29	31	Hospitalized covid vs. not hospitalized covid	2430	-0.0399967	0.0368424	0.27765
IL6R_8092_29	31	Hospitalized covid vs. population	7885	-0.0591008	0.0189245	0.00179031
IL6R_8092_29	31	Covid vs. lab/self-reported negative	11085	-0.0244656	0.0144107	0.0895569
IL6R_8092_29	31	Covid vs. population	17965	-0.0286742	0.0117582	0.0147417
IL6R_8092_29	31	Predicted covid from self-reported symptoms vs. predicted or self-reported non-covid	3204	-0.0150479	0.0236133	0.523951
QSOX2_8397_147_3	19	Very severe respiratory confirmed covid vs not hospitalised covid	269	0.130255	0.194637	0.503354
QSOX2_8397_147_3	19	Very severe respiratory confirmed covid vs. population	4336	0.169655	0.0401147	2.34487e-05
QSOX2_8397_147_3	18	Hospitalized covid vs. not hospitalized covid	2430	0.062116	0.0522099	0.23415
QSOX2_8397_147_3	20	Hospitalized covid vs. population	7885	0.115415	0.0279594	3.66013e-05
QSOX2_8397_147_3	20	Covid vs. lab/self-reported negative	11085	0.0651158	0.0215169	0.00247598
QSOX2_8397_147_3	20	Covid vs. population	17965	0.0624129	0.0177383	0.00043395
QSOX2_8397_147_3	20	Predicted covid from self-reported symptoms vs. predicted or self-reported non-covid	3204	0.0228049	0.0423617	0.590343
SELE_3470_1_2	12	Very severe respiratory confirmed covid vs not hospitalised covid	269	0.0681996	0.185082	0.712513
SELE_3470_1_2	15	Very severe respiratory confirmed covid vs. population	4336	-0.148941	0.0382734	9.96223e-05
SELE_3470_1_2	12	Hospitalized covid vs. not hospitalized covid	2430	0.0114378	0.0520428	0.826045
SELE_3470_1_2	15	Hospitalized covid vs. population	7885	-0.124041	0.0268296	3.77701e-06
SELE_3470_1_2	15	Covid vs. lab/self-reported negative	11085	-0.0581063	0.0212452	0.00623741
SELE_3470_1_2	15	Covid vs. population	17965	-0.0658136	0.0174784	0.000166267
SELE_3470_1_2	13	Predicted covid from self-reported symptoms vs. predicted or self-reported non-covid	3204	-0.0492841	0.043173	0.253641
TIE1_2844_53_2	10	Very severe respiratory confirmed covid vs. population	4336	0.0751942	0.0448208	0.0934132
TIE1_2844_53_2	10	Hospitalized covid vs. not hospitalized covid	2430	0.0273514	0.0510812	0.592338
TIE1_2844_53_2	10	Hospitalized covid vs. population	7885	0.104204	0.030774	0.000708939
TIE1_2844_53_2	9	Covid vs. lab/self-reported negative	11085	0.0170731	0.0210268	0.416808
TIE1_2844_53_2	10	Covid vs. population	17965	0.0516387	0.017662	0.0034588
TIE1_2844_53_2	10	Predicted covid from self-reported symptoms vs. predicted or self-reported non-covid	3204	0.0102575	0.0401539	0.798372
