# Supplementary material for: A proteome-wide genetic investigation identifies several SARS-CoV-2-exploited host targets of clinical relevance
Source: eLife. 2021 Aug 17;10:e69719. doi: 10.7554/eLife.69719 (PMC8457835; doi:10.7554/eLife.69719)
Supplement: Supplementary file 6. [file elife-69719-supp6.xlsx]

## Sheet: Sheet1
Protein-wide association of the ABO signal
gene	probe_sun	variant_sun	rsid_sun	beta_sun	se_sun	logp_sun	p_sun	probe_emilsson	variant_emilsson	rsid_emilsson	beta_emilsson	se_emilsson	p_emilsson	probe_suhre	variant_suhre	rsid_suhre	beta_suhre	se_suhre	p_suhre
ABO	ABO.9253	9_133257521_T_TC	rs8176719	1.2044	0.0158	-1267.64	0	ABO.9253.52.3	9_133263862_C_A	rs657152	1.341	0.0113644	1e-307	NA	NA	NULL	NA	NA	NA
CD209	CD209.3029	9_133257521_T_TC	rs8176719	0.7728	0.0225	-257.22	6.0256e-258	CD209.3029.52.2	9_133263862_C_A	rs657152	0.8483	0.0180797	1e-307	CD209.3029.52.2	9_133263862_C_A	rs657152	0.7552	0.0375721	1.274e-75
QSOX2	QSOX2.8397.147.3	9_133257521_T_TC	rs8176719	0.721	0.023	-214.11	7.76247e-215	QSOX2.8397.147.3	9_133263862_C_A	rs657152	0.5203	0.0201589	1.715e-138	NA	NA	NULL	NA	NA	NA
SELE	SELE.3470.1.2	9_133257521_T_TC	rs8176719	-0.6772	0.0234	-182.73	1.86209e-183	SELE.3470.1.2	9_133263862_C_A	rs657152	-0.6077	0.0196096	5.512e-194	SELE.3470.1.2	9_133263862_C_A	rs657152	-0.6272	0.0381973	9.139e-54
FAM3D	FAM3D.13102	9_133257521_T_TC	rs8176719	0.5631	0.0243	-117.62	2.39883e-118	FAM3D.13102.1.3	9_133263862_C_A	rs657152	0.5295	0.0201714	6.533e-143	NA	NA	NULL	NA	NA	NA
GOLM1	GOLM1.8983.7	9_133257521_T_TC	rs8176719	0.4509	0.025	-71.75	1.77828e-72	GOLM1.8983.7.3	9_133263862_C_A	rs657152	0.3599	0.0207077	7.419e-66	NA	NA	NULL	NA	NA	NA			Legend
F8	F8.13499	9_133257521_T_TC	rs8176719	0.4472	0.025	-70.6	2.51189e-71	F8.13499.30.3	9_133263862_C_A	rs657152	0.3572	0.0201013	1.102e-68	NA	NA	NULL	NA	NA	NA			gene	HGNC gene symbol of protein
TIE1	TIE1.2844.53.2	9_133257521_T_TC	rs8176719	0.4439	0.0251	-69.43	3.71535e-70	TIE1.2844.53.2	9_133263862_C_A	rs657152	0.368	0.0206394	4.025e-69	TIE1.2844.53.2	9_133263862_C_A	rs657152	0.4628	0.0428519	8.454e-26			probe_sun	protein probe from Sun et al
C1GALT1C1	C1GALT1C1.5735	9_133257521_T_TC	rs8176719	0.3736	0.0254	-48.15	7.07946e-49	C1GALT1C1.5735.54.3	9_133263862_C_A	rs657152	0.2047	0.0213096	1.13e-21	NA	NA	NULL	NA	NA	NA			variant_sun	variant (chr_pos_ref_alt) used in Sun et al, with position from GRCh38 build
KDR	KDR.3651.50	9_133257521_T_TC	rs8176719	-0.3617	0.0254	-45.12	7.58578e-46	NA	NA	NULL	NA	NA	NA	NA	NA	NULL	NA	NA	NA			beta_sun	Effect per alt allele of variant_sun
IL3RA	IL3RA.13744.37	9_133257521_T_TC	rs8176719	-0.3599	0.0255	-44.55	2.81838e-45	IL3RA.13744.37.3	9_133263862_C_A	rs657152	-0.248	0.0200972	1.657e-34	NA	NA	NULL	NA	NA	NA			se_sun	standard error of beta_sun
GLCE	GLCE.7808.5	9_133257521_T_TC	rs8176719	0.3565	0.0255	-43.67	2.13796e-44	GLCE.7808.5.3	9_133263862_C_A	rs657152	0.2238	0.0212738	1.278e-25	NA	NA	NULL	NA	NA	NA			logp_sun	log10 (p-value) of association between variant_sun and probe_sun
ADGRF5	ADGRF5.6409	9_133257521_T_TC	rs8176719	-0.3056	0.0257	-31.88	1.31826e-32	ADGRF5.6409.57.3	9_133263862_C_A	rs657152	-0.3286	0.0210237	6.989e-54	NA	NA	NULL	NA	NA	NA			p_sun	p-value of association between variant_sun and probe_sun
FLT4	FLT4.2358.19	9_133257521_T_TC	rs8176719	-0.2885	0.0258	-28.39	4.0738e-29	FLT4.2358.19.2	9_133263862_C_A	rs657152	-0.2838	0.0210067	6.276e-41	FLT4.2358.19.2	9_133263862_C_A	rs657152	-0.3119	0.0438246	2.115e-12			probe_emilsson	protein probe from Emilsson et al
INSR	INSR.3448.13	9_133257521_T_TC	rs8176719	-0.2839	0.0258	-27.48	3.31131e-28	INSR.3448.13.2	9_133263862_C_A	rs657152	-0.3279	0.0206226	1.274e-55	INSR.3448.13.2	9_133263862_C_A	rs657152	-0.3502	0.0434977	2.332e-15			variant_emilsson	variant (chr_pos_ref_alt) used in Emilsson et al (r2 > 0.9 with variant_sun) , with position from GRCh38 build
CHST15	CHST15.4469	9_133257521_T_TC	rs8176719	-0.2408	0.0259	-19.84	1.44544e-20	CHST15.4469.78.2	9_133263862_C_A	rs657152	-0.2365	0.0207456	9.517e-30	CHST15.4469.78.2	9_133263862_C_A	rs657152	-0.2972	0.04306	9.117e-12			beta_emilsson	Effect per alt allele of variant_emilsson
CHST15	CHST15.4469	9_133257521_T_TC	rs8176719	-0.2408	0.0259	-19.84	1.44544e-20	CHST15.14097.86.3	9_133263862_C_A	rs657152	-0.2188	0.0207197	8.462e-26	CHST15.4469.78.2	9_133263862_C_A	rs657152	-0.2972	0.04306	9.117e-12			se_emilsson	standard error of beta_emilsson
B3GNT2	B3GNT2.7980	9_133257521_T_TC	rs8176719	0.2399	0.0259	-19.7	1.99526e-20	B3GNT2.7980.72.3	9_133263862_C_A	rs657152	0.1677	0.0212278	3.351e-15	NA	NA	NULL	NA	NA	NA			p_emilsson	p-value of association between variant_emilsson and probe_emilsson
SELP	SELP.4154.57.2	9_133257521_T_TC	rs8176719	-0.2364	0.0259	-19.13	7.4131e-20	SELP.4154.57.2	9_133263862_C_A	rs657152	-0.1537	0.0212881	5.944e-13	NA	NA	NULL	NA	NA	NA			probe_suhre	protein probe from Suhre et al
MET	MET.2837.3	9_133257521_T_TC	rs8176719	-0.2299	0.0259	-18.14	7.24436e-19	MET.2837.3.2	9_133263862_C_A	rs657152	-0.2341	0.0211472	3.667e-28	MET.2837.3.2	9_133263862_C_A	rs657152	-0.2928	0.0415673	3.494e-12			variant_suhre	variant (chr_pos_ref_alt) used in Suhre et al (r2 > 0.9 with variant_sun), , with position from GRCh38 build
MET	MET.2837.3	9_133257521_T_TC	rs8176719	-0.2299	0.0259	-18.14	7.24436e-19	MET.11814.29.3	9_133263862_C_A	rs657152	-0.1444	0.0212415	1.179e-11	MET.2837.3.2	9_133263862_C_A	rs657152	-0.2928	0.0415673	3.494e-12			beta_suhre	Effect per alt allele of variant_suhre
CHST15	CHST15.14097	9_133257521_T_TC	rs8176719	-0.2183	0.026	-16.38	4.16869e-17	CHST15.4469.78.2	9_133263862_C_A	rs657152	-0.2365	0.0207456	9.517e-30	CHST15.4469.78.2	9_133263862_C_A	rs657152	-0.2972	0.04306	9.117e-12			se_suhre	standard error of beta_suhre
CHST15	CHST15.14097	9_133257521_T_TC	rs8176719	-0.2183	0.026	-16.38	4.16869e-17	CHST15.14097.86.3	9_133263862_C_A	rs657152	-0.2188	0.0207197	8.462e-26	CHST15.4469.78.2	9_133263862_C_A	rs657152	-0.2972	0.04306	9.117e-12			p_suhre	p-value of association between variant_suhre and probe_suhre
ICAM5	ICAM5.8245.27	9_133257521_T_TC	rs8176719	-0.2071	0.026	-14.78	1.65959e-15	ICAM5.8245.27.3	9_133263862_C_A	rs657152	-0.314	0.0208499	3.065e-50	NA	NA	NULL	NA	NA	NA
ICAM5	ICAM5.8245.27	9_133257521_T_TC	rs8176719	-0.2071	0.026	-14.78	1.65959e-15	ICAM5.5124.62.3	9_133263862_C_A	rs657152	-0.198	0.0211448	1.107e-20	NA	NA	NULL	NA	NA	NA
DSG2	DSG2.9484	9_133257521_T_TC	rs8176719	0.2037	0.026	-14.33	4.67735e-15	DSG2.9484.75.3	9_133263862_C_A	rs657152	0.1413	0.0206609	8.895e-12	NA	NA	NULL	NA	NA	NA
TPST2	TPST2.8024.64.3	9_133257521_T_TC	rs8176719	0.2023	0.026	-14.14	7.24436e-15	NA	NA	NULL	NA	NA	NA	NA	NA	NULL	NA	NA	NA
MBL2	MBL2.3000.66	9_133257521_T_TC	rs8176719	0.1986	0.026	-13.65	2.23872e-14	MBL2.3000.66.1	9_133263862_C_A	rs657152	0.2017	0.0210389	1.356e-21	NA	NA	NULL	NA	NA	NA
FAM3B	FAM3B.9177	9_133257521_T_TC	rs8176719	0.1928	0.026	-12.88	1.31826e-13	FAM3B.9177.6.3	9_133263862_C_A	rs657152	0.146	0.0211963	6.334e-12	NA	NA	NULL	NA	NA	NA
CHST11	CHST11.7779	9_133257521_T_TC	rs8176719	0.1871	0.026	-12.18	6.60693e-13	NA	NA	NULL	NA	NA	NA	NA	NA	NULL	NA	NA	NA
KIN	KIN.14643.27	9_133257521_T_TC	rs8176719	-0.1768	0.0261	-10.93	1.1749e-11	KIN.14643.27.3	9_133263862_C_A	rs657152	-0.2303	0.020804	3.499e-28	NA	NA	NULL	NA	NA	NA
CASC4	NA	NA	NULL	NA	NA	NA	NA	CASC4.8838.10.3	9_133263862_C_A	rs657152	0.2399	0.0211366	1.57e-29	NA	NA	NULL	NA	NA	NA
CASC4	NA	NA	NULL	NA	NA	NA	NA	CASC4.10613.33.3	9_133263862_C_A	rs657152	0.1907	0.021163	2.79e-19	NA	NA	NULL	NA	NA	NA
CCL28	NA	NA	NULL	NA	NA	NA	NA	CCL28.2890.59.2	9_133263862_C_A	rs657152	-0.1539	0.021304	5.74e-13	NA	NA	NULL	NA	NA	NA
CD200	NA	NA	NULL	NA	NA	NA	NA	CD200.5112.73.3	9_133263862_C_A	rs657152	-0.1557	0.0209923	1.385e-13	NA	NA	NULL	NA	NA	NA
CD36	NA	NA	NULL	NA	NA	NA	NA	CD36.2973.15.2	9_133263862_C_A	rs657152	0.2284	0.020726	5.963e-28	CD36.2973.15.2	9_133263862_C_A	rs657152	-0.345	0.0404265	5.237e-17
DPEP2	NA	NA	NULL	NA	NA	NA	NA	DPEP2.8327.26.3	9_133263862_C_A	rs657152	-0.1659	0.0209788	3.155e-15	NA	NA	NULL	NA	NA	NA
ENG	NA	NA	NULL	NA	NA	NA	NA	ENG.4908.6.1	9_133263862_C_A	rs657152	-0.1349	0.0211409	1.913e-10	NA	NA	NULL	NA	NA	NA
EPHA4	NA	NA	NULL	NA	NA	NA	NA	EPHA4.7190.50.3	9_133263862_C_A	rs657152	-0.1785	0.0205409	4.758e-18	NA	NA	NULL	NA	NA	NA
FAM177A1	NA	NA	NULL	NA	NA	NA	NA	FAM177A1.8039.41.3	9_133263862_C_A	rs657152	-0.1384	0.021474	1.261e-10	NA	NA	NULL	NA	NA	NA
GNS	NA	NA	NULL	NA	NA	NA	NA	GNS.3616.3.5	9_133263862_C_A	rs657152	-0.1615	0.0213992	5.194e-14	NA	NA	NULL	NA	NA	NA
ICAM1	NA	NA	NULL	NA	NA	NA	NA	ICAM1.4342.10.3	9_133263862_C_A	rs657152	-0.157	0.0213605	2.281e-13	NA	NA	NULL	NA	NA	NA
ICAM2	NA	NA	NULL	NA	NA	NA	NA	ICAM2.14756.29.3	9_133263862_C_A	rs657152	-0.4129	0.0207905	1.017e-84	NA	NA	NULL	NA	NA	NA
ICAM2	NA	NA	NULL	NA	NA	NA	NA	ICAM2.5486.73.3	9_133263862_C_A	rs657152	-0.1459	0.0213961	1.018e-11	NA	NA	NULL	NA	NA	NA
ICAM4	NA	NA	NULL	NA	NA	NA	NA	ICAM4.6550.4.3	9_133263862_C_A	rs657152	-0.1435	0.0213478	1.986e-11	NA	NA	NULL	NA	NA	NA
LIFR	NA	NA	NULL	NA	NA	NA	NA	LIFR.5837.49.3	9_133263862_C_A	rs657152	-0.1567	0.0212619	1.962e-13	NA	NA	NULL	NA	NA	NA
LRRC32	NA	NA	NULL	NA	NA	NA	NA	LRRC32.7551.33.4	9_133263862_C_A	rs657152	0.2225	0.0205828	5.799e-27	NA	NA	NULL	NA	NA	NA
PNPLA2	NA	NA	NULL	NA	NA	NA	NA	PNPLA2.9802.27.3	9_133263862_C_A	rs657152	-0.1714	0.0212708	9.485e-16	NA	NA	NULL	NA	NA	NA
ROBO4	NA	NA	NULL	NA	NA	NA	NA	ROBO4.9232.1.3	9_133263862_C_A	rs657152	-0.1788	0.0205896	5.014e-18	NA	NA	NULL	NA	NA	NA
SHANK3	NA	NA	NULL	NA	NA	NA	NA	SHANK3.13242.134.3	9_133263862_C_A	rs657152	0.3216	0.0204971	3.068e-54	NA	NA	NULL	NA	NA	NA
VWF	NA	NA	NULL	NA	NA	NA	NA	VWF.3050.7.2	9_133263862_C_A	rs657152	0.2803	0.0207784	7.996e-41	VWF.3050.7.2	9_133263862_C_A	rs657152	0.3889	0.0425027	3.164e-19
