# Supplementary material for: A proteome-wide genetic investigation identifies several SARS-CoV-2-exploited host targets of clinical relevance
Source: eLife. 2021 Aug 17;10:e69719. doi: 10.7554/eLife.69719 (PMC8457835; doi:10.7554/eLife.69719)
Supplement: Supplementary file 7. [file elife-69719-supp7.xlsx]

## Sheet: Sheet1
Protein-wide colocalisation analysis
nsnps	PP.H0.abf	PP.H1.abf	PP.H2.abf	PP.H3.abf	PP.H4.abf	coloc_snp	left_trait	right_trait	rsid	mr_beta	mr_se	mr_lci	mr_uci	mr_p	cis-eqtl	missense
8127	0	1.14726e-07	0	5.01821e-07	0.999999	9:133257521:T:TC	ENSG00000175164_ABO.9253.52.3_sun_pQTL	ENSG00000175164_ABO.9253.52.3_COVID_C2_h	rs8176719	0.0832946	0.012862	0.0580855	0.108504	9.41746e-11	Yes	Not missense or in LD with missense variants
7953	0	9.2821e-06	0	5.96709e-05	0.999931	9:133257521:T:TC	ENSG00000175164_ABO.9253.52.3_sun_pQTL	ENSG00000175164_ABO.9253.52.3_COVID_B2_h	rs8176719	0.12035	0.0211317	0.078933	0.161768	1.23186e-08	Yes	Not missense or in LD with missense variants
8162	0	0.00095929	0	0.000500486	0.99854	9:133257521:T:TC	ENSG00000175164_ABO.9253.52.3_sun_pQTL	ENSG00000175164_ABO.9253.52.3_COVID_C1_h	rs8176719	0.0760802	0.0157165	0.0452764	0.106884	1.29335e-06	Yes	Not missense or in LD with missense variants
7872	0	0.0274809	0	0.0220772	0.950442	9:133257521:T:TC	ENSG00000175164_ABO.9253.52.3_sun_pQTL	ENSG00000175164_ABO.9253.52.3_COVID_A2_h	rs8176719	0.125324	0.0317436	0.0631075	0.18754	7.88063e-05	Yes	Not missense or in LD with missense variants
7063	2.12863e-37	0.0397139	1.34866e-37	0.0242259	0.93606	10:89009208:A:G	ENSG00000026103_FAS.9459.7.3_sun_pQTL	ENSG00000026103_FAS.9459.7.3_COVID_A2_h	rs7911226	0.320843	0.082745	0.158665	0.48302	0.000105543	Yes	Not missense or in LD with missense variants
7060	5.45092e-28	0.0497644	3.45369e-28	0.030611	0.919625	10:89009208:A:G	ENSG00000026103_FAS.5392.73.2_sun_pQTL	ENSG00000026103_FAS.5392.73.2_COVID_A2_h	rs7911226	0.365069	0.094151	0.180536	0.549601	0.000105543	Yes	Not missense or in LD with missense variants
5301	3.35541e-22	0.0179815	1.92652e-21	0.102362	0.879656	12:112919388:G:A	ENSG00000089127_OAS1.10361.25.3_sun_pQTL	ENSG00000089127_OAS1.10361.25.3_COVID_C2_h	rs10774671	-0.240304	0.0502091	-0.338712	-0.141896	1.70082e-06	Yes	missense
4244	0.0191438	0.114025	0.00472199	0.0272904	0.834819	1:155133406:T:G	ENSG00000169231_THBS3.8982.65.3_sun_pQTL	ENSG00000169231_THBS3.8982.65.3_COVID_C1_h	rs4971066	0.530782	0.135726	0.264764	0.796799	9.20326e-05	Yes	Not missense or in LD with missense variants		Legends
5209	5.9221e-24	0.000317237	3.41727e-21	0.18224	0.817443	12:112919637:G:A	ENSG00000089127_OAS1.10361.25.3_sun_pQTL	ENSG00000089127_OAS1.10361.25.3_COVID_B2_h	rs2660	-0.460436	0.0864874	-0.629948	-0.290924	1.01656e-07	Yes	missense		nsnps	Number of SNPs representing the coloc region
5156	3.17261e-25	1.69854e-05	5.39376e-21	0.288057	0.711926	12:112923312:C:T	ENSG00000089127_OAS1.10361.25.3_sun_pQTL	ENSG00000089127_OAS1.10361.25.3_COVID_A2_h	rs10850097	-0.658437	0.112289	-0.878518	-0.438355	4.52424e-09	Not assessed	Not assessed		PP.H0.abf	Posterior probability of no association with either trait
3938	0.00167979	0.245543	0.00035112	0.0506231	0.701802	3:50302191:C:T	ENSG00000114378_HYAL1.8309.12.3_sun_pQTL	ENSG00000114378_HYAL1.8309.12.3_COVID_D1_h	rs116482870	0.646588	0.193348	0.267633	1.02554	0.000825291	Not assessed	Not assessed		PP.H1.abf	Posterior probability of association with left_trait, not with right_trait
6837	8.42115e-16	0.229894	4.10477e-16	0.1114	0.658706	8:27949917:G:C	ENSG00000168079_SCARA5.10419.1.3_sun_pQTL	ENSG00000168079_SCARA5.10419.1.3_COVID_B2_h	rs2685417	-0.412685	0.107121	-0.622637	-0.202732	0.000116906	Not assessed	Not assessed		PP.H2.abf	Posterior probability of association with right_trait, not with left_trait
6398	2.61178e-34	0.255147	9.75242e-35	0.0946222	0.650231	1:22735058:G:A	ENSG00000133216_EPHB2.8225.86.3_sun_pQTL	ENSG00000133216_EPHB2.8225.86.3_COVID_D1_h	rs6687487	-0.248122	0.0788027	-0.402572	-0.0936711	0.0016403	Not assessed	Not assessed		PP.H3.abf	Posterior probability of independent genetic signals by left_trait and right_trait
6401	3.10899e-17	0.261392	1.16164e-17	0.0970249	0.641583	1:22735058:G:A	ENSG00000133216_EPHB2.5077.28.3_sun_pQTL	ENSG00000133216_EPHB2.5077.28.3_COVID_D1_h	rs6687487	-0.333187	0.105819	-0.540589	-0.125785	0.0016403	Not assessed	Not assessed		PP.H4.abf	Posterior probability of shared genetic signals by left_trait and right_trait
6401	4.73202e-13	0.273739	1.7678e-13	0.10164	0.624621	1:22735058:G:A	ENSG00000133216_EPHB2.8348.4.3_sun_pQTL	ENSG00000133216_EPHB2.8348.4.3_COVID_D1_h	rs6687487	-0.37377	0.118708	-0.606433	-0.141106	0.0016403	Not assessed	Not assessed		coloc_snp	candidate colocalising signal in the format chr:pos:ref:alt, with position from GRCh38 build
4577	4.87101e-211	0.25733	2.96504e-211	0.156053	0.586617	2:135851076:G:A	ENSG00000115850_LCT.9017.58.3_sun_pQTL	ENSG00000115850_LCT.9017.58.3_COVID_B2_h	rs4988235	-0.137737	0.0395889	-0.21533	-0.0601441	0.000502949	Not assessed	Not assessed		left_trait	cis-region of proteomic trait in the format EnsemblID_Probe_DataSource
6133	3.70048e-08	0.304802	1.43083e-08	0.117277	0.57792	15:50072644:T:C	ENSG00000140285_FGF7.14031.18.3_sun_pQTL	ENSG00000140285_FGF7.14031.18.3_COVID_D1_h	rs7162172	-0.542295	0.148464	-0.83328	-0.25131	0.000259503	Not assessed	Not assessed		right_trait	corresponding cis-region of COVID-19 phenotype in the format EnsemblID_Probe_DataSource
6067	4.79933e-101	0.265316	3.01517e-101	0.166116	0.568567	19:836043:T:C	ENSG00000196415_PRTN3.3514.49.2_sun_pQTL	ENSG00000196415_PRTN3.3514.49.2_COVID_A1_h	rs10425544	1.26301	0.339392	0.597814	1.92821	0.00019813	Not assessed	Not assessed		rsid	rsid of coloc_snp
6071	2.75129e-88	0.270899	1.72991e-88	0.169772	0.55933	19:836043:T:C	ENSG00000196415_PRTN3.13720.95.3_sun_pQTL	ENSG00000196415_PRTN3.13720.95.3_COVID_A1_h	rs10425544	1.33782	0.359494	0.633222	2.04241	0.00019813	Not assessed	Not assessed		mr_beta	Wald ratio representing per coloc_snp alt allele beta of right_trait divided by coloc_snp per alt allele beta of left_trait
6339	1.89062e-47	0.306156	8.3725e-48	0.13502	0.558824	8:11847939:G:A	ENSG00000164733_CTSB.3061.61.2_sun_pQTL	ENSG00000164733_CTSB.3061.61.2_COVID_A2_h	rs1692819	0.228768	0.0748139	0.0821356	0.375401	0.00222947	Not assessed	Not assessed		mr_se	standard error of mr_beta
4212	0.0416407	0.247873	0.0218988	0.129797	0.55879	1:155133406:T:G	ENSG00000169231_THBS3.8982.65.3_sun_pQTL	ENSG00000169231_THBS3.8982.65.3_COVID_C2_h	rs4971066	0.441383	0.116377	0.213288	0.669478	0.00014902	Not assessed	Not assessed		mr_lci	lower bound of the 95% confidence interval of mr_beta
4541	1.22601e-211	0.0642335	8.43635e-211	0.441507	0.494259	2:135851076:G:A	ENSG00000115850_LCT.9017.58.3_sun_pQTL	ENSG00000115850_LCT.9017.58.3_COVID_A2_h	rs4988235	-0.201727	0.0560137	-0.311512	-0.0919423	0.000316521	Not assessed	Not assessed		mr_uci	upper bound of the 95% confidence interval of mr_beta
6472	0.0608891	0.025773	0.295435	0.124558	0.493345	12:7270611:C:T	ENSG00000139197_PEX5.5915.58.3_sun_pQTL	ENSG00000139197_PEX5.5915.58.3_COVID_C1_h	rs111654488	-0.930619	0.199313	-1.32127	-0.539973	3.02471e-06	Not assessed	Not assessed		mr_p	p-value of mr_beta
6554	0.0813227	0.278216	0.0354164	0.12068	0.484365	1:58943480:G:A	ENSG00000177606_JUN.10356.21.3_sun_pQTL	ENSG00000177606_JUN.10356.21.3_COVID_D1_h	rs72680107	-0.784736	0.244711	-1.26436	-0.305111	0.00134226	Not assessed	Not assessed		cis-eqtl	whether coloc_snp is a cis-eqtl (assessed only for shared signals at PP.H4.abf > 0.6)
5482	0.00978431	0.143771	0.0233346	0.342399	0.480711	8:8471238:C:A	ENSG00000176782_DEFB104A.5763.67.3_sun_pQTL	ENSG00000176782_DEFB104A.5763.67.3_COVID_B1_h	rs553751473	1.14527	0.350075	0.459133	1.8314	0.00106982	Not assessed	Not assessed		missense	whether snp is a missense variant
4364	0	0.402645	0	0.122474	0.474881	1:154453788:C:T	ENSG00000160712_IL6R.8092.29.3_sun_pQTL	ENSG00000160712_IL6R.8092.29.3_COVID_B2_h	rs4129267	-0.0598177	0.0193795	-0.0978007	-0.0218346	0.00202426	Not assessed	Not assessed
5444	2.77296e-245	0.327047	1.75677e-245	0.20673	0.466223	22:30616769:T:C	ENSG00000185339_TCN2.5584.21.3_sun_pQTL	ENSG00000185339_TCN2.5584.21.3_COVID_A1_h	rs4820885	-0.656147	0.207534	-1.06291	-0.249388	0.00156886	Not assessed	Not assessed
10080	1.10307e-83	0.331943	6.89979e-84	0.207172	0.460886	10:5974436:C:A	ENSG00000134470_IL15RA.14054.17.3_sun_pQTL	ENSG00000134470_IL15RA.14054.17.3_COVID_C2_h	rs7086174	0.0955617	0.0280189	0.0406457	0.150478	0.000648162	Not assessed	Not assessed
4364	0	0.416519	0	0.126758	0.456723	1:154452980:G:A	ENSG00000160712_IL6R.4139.71.2_sun_pQTL	ENSG00000160712_IL6R.4139.71.2_COVID_B2_h	rs12126142	-0.0602468	0.0192669	-0.0980092	-0.0224843	0.00176629	Not assessed	Not assessed
8104	0.164268	0.0999115	0.181806	0.110135	0.44388	4:57228720:T:C	ENSG00000128050_PAICS.9841.197.3_sun_pQTL	ENSG00000128050_PAICS.9841.197.3_COVID_A2_h	rs2109589	-1.36495	0.311262	-1.97501	-0.754889	1.15871e-05	Not assessed	Not assessed
5818	0.024374	0.00856021	0.395752	0.138556	0.432758	17:49863303:C:T	ENSG00000005882_PDK2.12651.21.3_sun_pQTL	ENSG00000005882_PDK2.12651.21.3_COVID_B2_h	rs77534576	-1.52544	0.294464	-2.10258	-0.948307	2.21389e-07	Not assessed	Not assessed
5638	1.35139e-54	0.423188	4.62924e-55	0.144533	0.432279	20:38340105:T:C	ENSG00000101425_BPI.4126.22.1_sun_pQTL	ENSG00000101425_BPI.4126.22.1_COVID_B2_h	rs77603326	0.150868	0.0493209	0.0542013	0.247536	0.0022214	Not assessed	Not assessed
7845	3.29501e-91	0.367317	1.91548e-91	0.213113	0.41957	9:133433011:T:G	ENSG00000160323_ADAMTS13.3175.51.5_sun_pQTL	ENSG00000160323_ADAMTS13.3175.51.5_COVID_D1_h	rs71503194	-0.158401	0.0548503	-0.265906	-0.0508965	0.00387847	Not assessed	Not assessed
10077	5.70654e-22	0.37394	3.57084e-22	0.233599	0.392461	10:5966995:C:T	ENSG00000134470_IL15RA.3445.53.2_sun_pQTL	ENSG00000134470_IL15RA.3445.53.2_COVID_C2_h	rs8177683	0.164209	0.0505003	0.0652304	0.263188	0.00114739	Not assessed	Not assessed
4714	0.132593	0.371897	0.0290147	0.0809948	0.3855	20:33547920:GTTACAC:G	ENSG00000149600_COMMD7.2823.7.1_sun_pQTL	ENSG00000149600_COMMD7.2823.7.1_COVID_C2_h	rs146837639	0.591298	0.174184	0.249904	0.932692	0.000687097	Not assessed	Not assessed
6888	1.38968e-10	0.349877	1.09349e-10	0.27493	0.375193	8:61627575:G:T	ENSG00000198363_ASPH.6998.106.3_sun_pQTL	ENSG00000198363_ASPH.6998.106.3_COVID_A2_h	rs112760834	0.434526	0.149727	0.141067	0.727985	0.00370638	Not assessed	Not assessed
6114	8.51216e-25	0.487811	2.4887e-25	0.142252	0.369937	1:11859214:A:G	ENSG00000120937_NPPB.7655.11.3_sun_pQTL	ENSG00000120937_NPPB.7655.11.3_COVID_C2_h	rs198389	-0.162379	0.0531084	-0.26647	-0.0582885	0.0022319	Not assessed	Not assessed
7482	1.18626e-11	0.405231	6.92647e-12	0.236251	0.358518	21:45950063:C:A	ENSG00000142156_COL6A1.11150.3.3_sun_pQTL	ENSG00000142156_COL6A1.11150.3.3_COVID_B1_h	rs867197	-0.500663	0.189834	-0.872731	-0.128594	0.00835528	Not assessed	Not assessed
7912	3.1962e-07	0.407804	1.87767e-07	0.23922	0.352975	10:43148018:A:G	ENSG00000169826_CSGALNACT2.10772.21.3_sun_pQTL	ENSG00000169826_CSGALNACT2.10772.21.3_COVID_B2_h	rs2435349	0.448929	0.151015	0.152946	0.744913	0.00295145	Not assessed	Not assessed
4344	0.000888297	0.459711	0.000371448	0.191884	0.347145	12:56100038:A:C	ENSG00000065361_ERBB3.2617.56.35_sun_pQTL	ENSG00000065361_ERBB3.2617.56.35_COVID_A1_h	rs2292238	-2.94453	1.02939	-4.9621	-0.926956	0.00423036	Not assessed	Not assessed
7046	8.12571e-101	0.428093	4.2931e-101	0.225831	0.346076	19:836043:T:C	ENSG00000196415_PRTN3.3514.49.2_sun_pQTL	ENSG00000196415_PRTN3.3514.49.2_COVID_B1_h	rs10425544	0.316024	0.117949	0.084849	0.547199	0.00737681	Not assessed	Not assessed
7112	0.116874	0.113448	0.215228	0.208573	0.345877	19:35739969:A:G	ENSG00000188508_KRTDAP.5739.75.3_sun_pQTL	ENSG00000188508_KRTDAP.5739.75.3_COVID_C1_h	rs144495330	0.976173	0.207968	0.568563	1.38378	2.68108e-06	Not assessed	Not assessed
7050	4.58621e-88	0.432787	2.42412e-88	0.228418	0.338795	19:836043:T:C	ENSG00000196415_PRTN3.13720.95.3_sun_pQTL	ENSG00000196415_PRTN3.13720.95.3_COVID_B1_h	rs10425544	0.334742	0.124935	0.0898746	0.579609	0.00737681	Not assessed	Not assessed
6522	0.00071608	0.000530789	0.381025	0.282097	0.335631	19:10355447:C:T	ENSG00000105371_ICAM4.6550.4.3_sun_pQTL	ENSG00000105371_ICAM4.6550.4.3_COVID_A2_h	rs11085727	-2.33147	0.392679	-3.10111	-1.56183	2.89675e-09	Not assessed	Not assessed
8088	1.57133e-15	0.46932	7.05597e-16	0.210425	0.320255	16:57360481:T:C	ENSG00000102962_CCL22.3508.78.3_sun_pQTL	ENSG00000102962_CCL22.3508.78.3_COVID_C1_h	rs41398344	-0.179479	0.0688721	-0.314466	-0.0444919	0.0091614	Not assessed	Not assessed
7792	2.95817e-110	0.439099	1.73234e-110	0.256838	0.304063	19:5830291:G:A	ENSG00000130383_FUT5.4549.78.2_sun_pQTL	ENSG00000130383_FUT5.4549.78.2_COVID_A2_h	rs778809	-0.138421	0.0498621	-0.236149	-0.0406928	0.005502	Not assessed	Not assessed
6578	2.09949e-17	0.481261	9.54015e-18	0.218386	0.300353	6:45949262:G:T	ENSG00000112782_CLIC5.12475.48.3_sun_pQTL	ENSG00000112782_CLIC5.12475.48.3_COVID_B1_h	rs35822882	-0.496307	0.186797	-0.862422	-0.130193	0.00788533	Not assessed	Not assessed
7842	1.33083e-104	0.453506	7.31289e-105	0.248903	0.297591	1:157701026:A:G	ENSG00000160856_FCRL3.4440.15.2_sun_pQTL	ENSG00000160856_FCRL3.4440.15.2_COVID_B1_h	rs7528684	-0.221017	0.0799753	-0.377765	-0.0642679	0.00571742	Not assessed	Not assessed
5712	2.68126e-23	0.461108	1.46566e-23	0.251769	0.287124	17:7651454:C:T	ENSG00000129244_ATP1B2.7218.87.3_sun_pQTL	ENSG00000129244_ATP1B2.7218.87.3_COVID_A1_h	rs1642762	1.37726	0.51076	0.376193	2.37834	0.00700724	Not assessed	Not assessed
7221	4.75706e-17	0.473452	2.51912e-17	0.250443	0.276105	5:55967493:TA:T	ENSG00000134352_IL6ST.2620.4.2_sun_pQTL	ENSG00000134352_IL6ST.2620.4.2_COVID_A2_h	rs35693103	0.47189	0.141526	0.194504	0.749276	0.00085514	Not assessed	Not assessed
4065	4.39905e-64	0.527881	1.67649e-64	0.200905	0.271214	20:33106254:C:T	ENSG00000125999_BPIFB1.11246.3.3_sun_pQTL	ENSG00000125999_BPIFB1.11246.3.3_COVID_A1_h	rs2424961	0.949771	0.342144	0.279181	1.62036	0.00550423	Not assessed	Not assessed
6238	0.295466	0.161646	0.177433	0.0968028	0.268653	22:38278994:G:C	ENSG00000100083_GGA1.13594.158.3_sun_pQTL	ENSG00000100083_GGA1.13594.158.3_COVID_B2_h	rs62230168	-0.986937	0.25286	-1.48253	-0.491341	9.49672e-05	Not assessed	Not assessed
9282	5.03538e-41	0.442956	3.29643e-41	0.289716	0.267329	21:41346335:C:T	ENSG00000183844_FAM3B.5618.50.3_sun_pQTL	ENSG00000183844_FAM3B.5618.50.3_COVID_B1_h	rs57529409	0.201082	0.0783591	0.0475015	0.354663	0.0102829	Not assessed	Not assessed
6439	5.12217e-20	0.534953	1.90958e-20	0.199169	0.265879	4:109932659:G:A	ENSG00000138798_EGF.5509.7.3_sun_pQTL	ENSG00000138798_EGF.5509.7.3_COVID_D1_h	rs28734982	0.367043	0.119254	0.133309	0.600777	0.00208518	Not assessed	Not assessed
8075	1.66765e-15	0.497677	8.05694e-16	0.240181	0.262142	16:57360481:T:C	ENSG00000102962_CCL22.3508.78.3_sun_pQTL	ENSG00000102962_CCL22.3508.78.3_COVID_C2_h	rs41398344	-0.159178	0.0642488	-0.285104	-0.033253	0.0132295	Not assessed	Not assessed
6249	6.11227e-05	0.000840001	0.0502675	0.690561	0.25827	17:45961419:A:G	ENSG00000073969_NSF.13992.12.3_sun_pQTL	ENSG00000073969_NSF.13992.12.3_COVID_B2_h	rs62063281	-1.34439	0.26862	-1.87087	-0.817902	5.59223e-07	Not assessed	Not assessed
5212	0.00367345	0.514309	0.00159069	0.222449	0.257977	1:1351441:G:C	ENSG00000162576_MXRA8.10521.10.3_sun_pQTL	ENSG00000162576_MXRA8.10521.10.3_COVID_B1_h	rs61766214	-1.00759	0.332427	-1.65913	-0.356044	0.00243737	Not assessed	Not assessed
6565	3.79553e-58	0.541812	1.43377e-58	0.204416	0.253772	8:63011205:T:C	ENSG00000137563_GGH.9370.69.3_sun_pQTL	ENSG00000137563_GGH.9370.69.3_COVID_C1_h	rs10957266	0.0975178	0.0347401	0.0294284	0.165607	0.00499951	Not assessed	Not assessed
5613	0.309279	0.251741	0.104199	0.0845636	0.250218	1:114310231:A:T	ENSG00000116774_OLFML3.8660.33.3_sun_pQTL	ENSG00000116774_OLFML3.8660.33.3_COVID_D1_h	rs190519665	-1.54241	0.402603	-2.3315	-0.753324	0.000127572	Not assessed	Not assessed
6152	0.00141431	0.0189816	0.0506004	0.678866	0.250137	17:45720994:A:G	ENSG00000073969_NSF.13992.12.3_sun_pQTL	ENSG00000073969_NSF.13992.12.3_COVID_A2_h	rs55938136	-0.966181	0.272824	-1.50091	-0.431457	0.00039799	Not assessed	Not assessed
4735	1.37928e-11	0.631931	2.58748e-12	0.118298	0.249771	3:52443064:T:C	ENSG00000010319_SEMA3G.5628.21.3_sun_pQTL	ENSG00000010319_SEMA3G.5628.21.3_COVID_C2_h	rs2016575	-0.192356	0.0643915	-0.318561	-0.0661507	0.00281467	Not assessed	Not assessed
6458	1.78436e-11	0.430279	1.33074e-11	0.320644	0.249077	21:45950063:C:A	ENSG00000142156_COL6A1.11150.3.3_sun_pQTL	ENSG00000142156_COL6A1.11150.3.3_COVID_A1_h	rs867197	-1.85035	0.692759	-3.20814	-0.492572	0.00756272	Not assessed	Not assessed
6270	6.47157e-14	0.498801	3.29093e-14	0.253403	0.247797	7:137331551:C:A	ENSG00000105894_PTN.3045.72.2_sun_pQTL	ENSG00000105894_PTN.3045.72.2_COVID_B1_h	rs1431093	-0.483424	0.183889	-0.84384	-0.123009	0.0085663	Not assessed	Not assessed
7745	8.01574e-19	0.502791	4.00419e-19	0.250918	0.246291	11:104160870:C:G	ENSG00000170962_PDGFD.9341.1.3_sun_pQTL	ENSG00000170962_PDGFD.9341.1.3_COVID_A2_h	rs7950273	0.373227	0.142139	0.0946394	0.651814	0.00864489	Not assessed	Not assessed
11217	6.57027e-13	0.464767	4.1343e-13	0.292209	0.243023	16:84805155:G:A	ENSG00000103196_CRISPLD2.5691.2.3_sun_pQTL	ENSG00000103196_CRISPLD2.5691.2.3_COVID_D1_h	rs12921670	0.350715	0.131706	0.092577	0.608853	0.00774767	Not assessed	Not assessed
7369	2.91153e-46	0.506359	1.45483e-46	0.252777	0.240864	14:20678425:C:T	ENSG00000258818_RNASE4.5644.60.3_sun_pQTL	ENSG00000258818_RNASE4.5644.60.3_COVID_B1_h	rs12588573	-0.26304	0.103865	-0.466612	-0.0594676	0.0113249	Not assessed	Not assessed
7864	2.10534e-259	0.478633	1.2386e-259	0.281347	0.24002	19:5840608:C:T	ENSG00000171124_FUT3.4548.4.2_sun_pQTL	ENSG00000171124_FUT3.4548.4.2_COVID_A2_h	rs708686	-0.117526	0.0450633	-0.205849	-0.0292039	0.00910654	Not assessed	Not assessed
8202	3.86017e-16	0.491874	2.1089e-16	0.268482	0.239644	14:20965208:A:C	ENSG00000169385_RNASE2.8394.56.3_sun_pQTL	ENSG00000169385_RNASE2.8394.56.3_COVID_B1_h	rs56204594	-0.431445	0.166631	-0.758037	-0.104854	0.00961936	Not assessed	Not assessed
5289	4.69668e-07	0.563345	1.64713e-07	0.197327	0.239327	11:16836252:C:T	ENSG00000166689_PLEKHA7.12731.12.3_sun_pQTL	ENSG00000166689_PLEKHA7.12731.12.3_COVID_D1_h	rs382280	0.429671	0.175566	0.0855689	0.773773	0.0143909	Not assessed	Not assessed
5255	0.166195	0.0739462	0.360999	0.160383	0.238477	2:165484074:T:A	ENSG00000115290_GRB14.13628.58.3_sun_pQTL	ENSG00000115290_GRB14.13628.58.3_COVID_C2_h	rs16850755	-0.810059	0.186361	-1.17532	-0.444798	1.38194e-05	Not assessed	Not assessed
13638	1.17126e-72	0.269226	2.14694e-72	0.493256	0.237518	6:32622382:C:A	ENSG00000237541_HLA.DQA2.7757.5.3_sun_pQTL	ENSG00000237541_HLA.DQA2.7757.5.3_COVID_A1_h	rs9271547	1.21671	0.398908	0.434866	1.99856	0.00228763	Not assessed	Not assessed
5677	7.79476e-05	0.562275	2.87928e-05	0.207467	0.230152	10:87414976:T:G	ENSG00000107789_MINPP1.5586.66.3_sun_pQTL	ENSG00000107789_MINPP1.5586.66.3_COVID_A2_h	rs3128161	0.646578	0.199115	0.25632	1.03684	0.00116521	Not assessed	Not assessed
6346	0.0164407	0.419623	0.0126747	0.323273	0.227988	7:79433960:T:C	ENSG00000187391_MAGI2.14066.49.3_sun_pQTL	ENSG00000187391_MAGI2.14066.49.3_COVID_A1_h	rs17152499	3.156	1.20269	0.798765	5.51323	0.00868752	Not assessed	Not assessed
4913	1.25201e-09	0.549441	5.08878e-10	0.223092	0.227467	1:12188885:A:G	ENSG00000028137_TNFRSF1B.8368.102.3_sun_pQTL	ENSG00000028137_TNFRSF1B.8368.102.3_COVID_D1_h	rs945439	0.360686	0.138722	0.088796	0.632576	0.00932062	Not assessed	Not assessed
5792	0.123822	0.0435893	0.451228	0.158623	0.222738	17:49863303:C:T	ENSG00000005882_PDK2.12651.21.3_sun_pQTL	ENSG00000005882_PDK2.12651.21.3_COVID_A2_h	rs77534576	-1.84074	0.373266	-2.57233	-1.10915	8.16235e-07	Not assessed	Not assessed
5995	6.44852e-47	0.5705	2.35727e-47	0.208326	0.221175	11:120227620:C:T	ENSG00000184232_OAF.6414.8.3_sun_pQTL	ENSG00000184232_OAF.6414.8.3_COVID_A2_h	rs117554512	-0.178917	0.0750851	-0.326081	-0.0317532	0.0171787	Not assessed	Not assessed
6879	0.00019546	0.540171	8.72941e-05	0.241026	0.21852	19:43652320:T:C	ENSG00000011422_PLAUR.2652.15.1_sun_pQTL	ENSG00000011422_PLAUR.2652.15.1_COVID_D1_h	rs2302524	0.429585	0.167789	0.100724	0.758446	0.0104592	Not assessed	Not assessed
5733	2.00271e-54	0.626461	4.98591e-55	0.155745	0.217794	20:38340105:T:C	ENSG00000101425_BPI.4126.22.1_sun_pQTL	ENSG00000101425_BPI.4126.22.1_COVID_C2_h	rs77603326	0.0794789	0.0292924	0.0220668	0.136891	0.00666182	Not assessed	Not assessed
5643	3.52761e-20	0.507493	1.91717e-20	0.275593	0.216914	22:37565346:C:T	ENSG00000100079_LGALS2.3033.57.1_sun_pQTL	ENSG00000100079_LGALS2.3033.57.1_COVID_A1_h	rs5756729	1.36509	0.5364	0.313766	2.41642	0.0109305	Not assessed	Not assessed
6438	2.83967e-51	0.479506	1.80297e-51	0.304234	0.21626	2:143043636:C:A	ENSG00000115919_KYNU.4559.64.2_sun_pQTL	ENSG00000115919_KYNU.4559.64.2_COVID_B1_h	rs73961713	-0.278566	0.103242	-0.480916	-0.0762159	0.00697172	Not assessed	Not assessed
9345	0.0224429	0.493682	0.0117172	0.257532	0.214626	7:55169103:C:T	ENSG00000146648_EGFR.2677.1.1_sun_pQTL	ENSG00000146648_EGFR.2677.1.1_COVID_D1_h	rs10081281	0.790076	0.296326	0.209288	1.37086	0.00767048	Not assessed	Not assessed
4244	0.00084121	0.26488	0.00164758	0.518575	0.214057	7:100212212:C:T	ENSG00000160862_AZGP1.9312.8.3_sun_pQTL	ENSG00000160862_AZGP1.9312.8.3_COVID_A2_h	rs1617502	1.28289	0.318079	0.659469	1.90632	5.50112e-05	Not assessed	Not assessed
7688	2.70664e-11	0.51867	1.409e-11	0.269793	0.211537	14:20812519:G:A	ENSG00000129538_RNASE1.7211.2.3_sun_pQTL	ENSG00000129538_RNASE1.7211.2.3_COVID_B1_h	rs17254387	0.566334	0.236321	0.103154	1.02951	0.0165542	Not assessed	Not assessed
5733	4.49489e-51	0.578114	1.63868e-51	0.210549	0.211337	11:108486410:G:A	ENSG00000178202_KDELC2.8296.117.3_sun_pQTL	ENSG00000178202_KDELC2.8296.117.3_COVID_B2_h	rs74911261	0.124201	0.0533549	0.019627	0.228774	0.0199216	Not assessed	Not assessed
7236	0.35123	0.224505	0.130432	0.083161	0.210673	12:69154473:A:G	ENSG00000135679_MDM2.4245.80.2_sun_pQTL	ENSG00000135679_MDM2.4245.80.2_COVID_C2_h	rs12318262	-0.65221	0.158523	-0.962908	-0.341511	3.88361e-05	Not assessed	Not assessed
5433	9.32678e-77	0.561762	3.78772e-77	0.227928	0.21031	4:73853224:C:A	ENSG00000109272_PF4V1.5663.18.3_sun_pQTL	ENSG00000109272_PF4V1.5663.18.3_COVID_B1_h	rs941758	-0.218169	0.0900466	-0.394657	-0.0416809	0.0153995	Not assessed	Not assessed
7774	3.11665e-11	0.579743	1.13011e-11	0.210007	0.210249	3:105527480:G:A	ENSG00000170017_ALCAM.5451.1.3_sun_pQTL	ENSG00000170017_ALCAM.5451.1.3_COVID_C2_h	rs9843750	-0.191237	0.0667589	-0.322082	-0.060392	0.00417547	Not assessed	Not assessed
6342	0.00107077	0.415059	0.000963102	0.373113	0.209794	15:78255107:C:A	ENSG00000140403_DNAJA4.9744.139.3_sun_pQTL	ENSG00000140403_DNAJA4.9744.139.3_COVID_A1_h	rs11639191	2.90291	1.07359	0.798703	5.00711	0.00685274	Not assessed	Not assessed
7950	0.159936	0.447281	0.0485634	0.135605	0.208614	3:112308988:G:T	ENSG00000091972_CD200.5112.73.3_sun_pQTL	ENSG00000091972_CD200.5112.73.3_COVID_C2_h	rs1879514	-0.564428	0.143844	-0.846358	-0.282499	8.71315e-05	Not assessed	Not assessed
6787	1.45712e-152	0.604075	4.59823e-153	0.190423	0.205502	19:43191870:T:A	ENSG00000243137_PSG4.5649.83.3_sun_pQTL	ENSG00000243137_PSG4.5649.83.3_COVID_C1_h	rs1138888	0.0793288	0.0296201	0.0212745	0.137383	0.00740173	Not assessed	Not assessed
7257	6.25787e-16	0.537767	3.0182e-16	0.259164	0.203069	3:126992227:G:A	ENSG00000114554_PLXNA1.9005.16.3_sun_pQTL	ENSG00000114554_PLXNA1.9005.16.3_COVID_B1_h	rs4679138	0.515851	0.1751	0.172662	0.85904	0.00321869	Not assessed	Not assessed
4755	1.45542e-11	0.66694	2.84269e-12	0.130063	0.202998	3:52443064:T:C	ENSG00000010319_SEMA3G.5628.21.3_sun_pQTL	ENSG00000010319_SEMA3G.5628.21.3_COVID_C1_h	rs2016575	-0.213026	0.0751358	-0.360289	-0.0657621	0.0045796	Not assessed	Not assessed
6375	0.0123434	0.17247	0.0409921	0.572567	0.201627	17:45680782:C:T	ENSG00000073969_NSF.13992.12.3_sun_pQTL	ENSG00000073969_NSF.13992.12.3_COVID_C2_h	rs62055697	-0.583287	0.15676	-0.89053	-0.276043	0.000198517	Not assessed	Not assessed
8451	2.21e-87	0.489839	1.39883e-87	0.309845	0.200316	6:169224805:A:G	ENSG00000186340_THBS2.3339.33.1_sun_pQTL	ENSG00000186340_THBS2.3339.33.1_COVID_B1_h	rs73043857	0.19452	0.0813619	0.0350535	0.353987	0.0168118	Not assessed	Not assessed
6980	1.19975e-23	0.624599	3.38023e-24	0.175778	0.199624	17:82331408:A:G	ENSG00000141574_SECTM1.13093.6.3_sun_pQTL	ENSG00000141574_SECTM1.13093.6.3_COVID_C1_h	rs4789763	-0.156264	0.0578111	-0.269571	-0.0429562	0.00687148	Not assessed	Not assessed
7851	0.110618	0.0674812	0.38771	0.236319	0.197871	4:100295923:T:A	ENSG00000196616_ADH1B.9834.62.3_sun_pQTL	ENSG00000196616_ADH1B.9834.62.3_COVID_C1_h	rs4130109	1.20676	0.245072	0.726423	1.68709	8.4756e-07	Not assessed	Not assessed
7202	0.00129957	0.514981	0.000723366	0.286453	0.196543	15:78249427:C:T	ENSG00000140403_DNAJA4.9744.139.3_sun_pQTL	ENSG00000140403_DNAJA4.9744.139.3_COVID_B1_h	rs1519819	0.91619	0.305889	0.316659	1.51572	0.00274287	Not assessed	Not assessed
6951	8.41676e-60	0.590057	3.10391e-60	0.217407	0.192536	1:161538827:A:G	ENSG00000162747_FCGR3B.3311.27.1_sun_pQTL	ENSG00000162747_FCGR3B.3311.27.1_COVID_C2_h	rs10919543	-0.0924374	0.0332874	-0.157679	-0.0271953	0.00548717	Not assessed	Not assessed
7071	0.201455	0.083094	0.371072	0.152864	0.191514	19:35739969:A:G	ENSG00000012124_CD22.2891.1.3_sun_pQTL	ENSG00000012124_CD22.2891.1.3_COVID_C1_h	rs144495330	1.08634	0.231439	0.632728	1.53995	2.68108e-06	Not assessed	Not assessed
5088	0.000312248	0.542652	0.000153356	0.266325	0.190558	12:56100038:A:C	ENSG00000065361_ERBB3.2617.56.35_sun_pQTL	ENSG00000065361_ERBB3.2617.56.35_COVID_C1_h	rs2292238	0.344953	0.108486	0.132323	0.557582	0.00147436	Not assessed	Not assessed
8850	0	0.501459	0	0.309539	0.189002	3:190628271:A:G	ENSG00000196083_IL1RAP.14048.7.3_sun_pQTL	ENSG00000196083_IL1RAP.14048.7.3_COVID_D1_h	rs6444442	0.0719393	0.028926	0.0152454	0.128633	0.0128822	Not assessed	Not assessed
8847	0	0.501866	0	0.309728	0.188406	3:190628271:A:G	ENSG00000196083_IL1RAP.2630.12.2_sun_pQTL	ENSG00000196083_IL1RAP.2630.12.2_COVID_D1_h	rs6444442	0.0703421	0.0282838	0.0149069	0.125777	0.0128822	Not assessed	Not assessed
8186	5.66231e-18	0.458189	4.38167e-18	0.354374	0.187437	20:1635560:A:G	ENSG00000089012_SIRPG.9241.40.3_sun_pQTL	ENSG00000089012_SIRPG.9241.40.3_COVID_B1_h	rs6043409	-0.441895	0.168261	-0.771681	-0.112109	0.00863322	Not assessed	Not assessed
5784	0.00847022	0.446102	0.0067047	0.352931	0.185792	1:113969681:A:G	ENSG00000116774_OLFML3.8660.5.3_sun_pQTL	ENSG00000116774_OLFML3.8660.5.3_COVID_C1_h	rs7554371	0.477853	0.149267	0.185295	0.770412	0.00136797	Not assessed	Not assessed
6902	1.99579e-15	0.544089	1.00093e-15	0.272689	0.183221	8:27949917:G:C	ENSG00000168079_SCARA5.10419.1.3_sun_pQTL	ENSG00000168079_SCARA5.10419.1.3_COVID_B1_h	rs2685417	-0.507782	0.174113	-0.849037	-0.166527	0.003541	Not assessed	Not assessed
4490	1.08765e-38	0.631205	3.21943e-39	0.186654	0.182142	1:196334759:T:C	ENSG00000134389_CFHR5.7885.17.3_sun_pQTL	ENSG00000134389_CFHR5.7885.17.3_COVID_B1_h	rs72732234	-0.288194	0.124098	-0.531422	-0.0449657	0.0202166	Not assessed	Not assessed
7209	2.02932e-259	0.464534	1.54444e-259	0.353358	0.182108	19:5840608:C:T	ENSG00000171124_FUT3.4548.4.2_sun_pQTL	ENSG00000171124_FUT3.4548.4.2_COVID_A1_h	rs708686	-0.435709	0.179238	-0.787009	-0.0844093	0.0150615	Not assessed	Not assessed
5110	0.000438944	0.163386	0.00175812	0.654237	0.18018	7:66824053:C:T	ENSG00000126522_ASL.11241.8.3_sun_pQTL	ENSG00000126522_ASL.11241.8.3_COVID_A2_h	rs6460315	0.553631	0.202923	0.155909	0.951353	0.00636661	Not assessed	Not assessed
7622	4.49682e-54	0.535475	2.3928e-54	0.284752	0.179773	7:145681495:G:C	ENSG00000174469_CNTNAP2.6965.19.3_sun_pQTL	ENSG00000174469_CNTNAP2.6965.19.3_COVID_B1_h	rs10274393	0.264474	0.104056	0.0605279	0.468419	0.011033	Not assessed	Not assessed
4790	3.89792e-103	0.554387	1.87427e-103	0.266391	0.179222	11:60931260:G:A	ENSG00000006118_TMEM132A.7871.16.3_sun_pQTL	ENSG00000006118_TMEM132A.7871.16.3_COVID_A1_h	rs11230521	-0.685589	0.285039	-1.24426	-0.126923	0.0161615	Not assessed	Not assessed
7200	0.0607556	0.460737	0.0350287	0.26546	0.178019	11:130098466:G:A	ENSG00000084234_APLP2.7915.31.3_sun_pQTL	ENSG00000084234_APLP2.7915.31.3_COVID_A2_h	rs7931642	0.759761	0.246511	0.276607	1.24291	0.00205579	Not assessed	Not assessed
7525	5.87168e-68	0.467143	4.47273e-68	0.355668	0.17719	11:125782644:T:A	ENSG00000237353_PATE4.8065.245.3_sun_pQTL	ENSG00000237353_PATE4.8065.245.3_COVID_A2_h	rs4472951	0.225842	0.0793514	0.0703162	0.381368	0.00442581	Not assessed	Not assessed
4913	0.000338503	0.585218	0.000137513	0.237562	0.176744	1:12189947:T:C	ENSG00000028137_TNFRSF1B.3152.57.1_sun_pQTL	ENSG00000028137_TNFRSF1B.3152.57.1_COVID_D1_h	rs5746011	0.464696	0.195074	0.082359	0.847033	0.0172115	Not assessed	Not assessed
6862	5.64741e-13	0.647639	1.5459e-13	0.177107	0.175254	5:180630293:T:C	ENSG00000037280_FLT4.2358.19.2_sun_pQTL	ENSG00000037280_FLT4.2358.19.2_COVID_C2_h	rs34221241	-0.163383	0.0644353	-0.289674	-0.0370921	0.0112251	Not assessed	Not assessed
7200	0.216021	0.297934	0.131042	0.180557	0.174447	22:37140682:A:ATGATGGT	ENSG00000100385_IL2RB.9343.16.3_sun_pQTL	ENSG00000100385_IL2RB.9343.16.3_COVID_B1_h	rs71296616	-1.74505	0.475812	-2.67762	-0.812475	0.000244915	Not assessed	Not assessed
4216	1.18732e-132	0.599702	4.49365e-133	0.226796	0.173502	20:35630751:G:C	ENSG00000214078_CPNE1.5346.24.3_sun_pQTL	ENSG00000214078_CPNE1.5346.24.3_COVID_D1_h	rs12481228	-0.104985	0.0443142	-0.191839	-0.0181304	0.0178316	Not assessed	Not assessed
6379	7.58163e-130	0.591671	3.01688e-130	0.235264	0.173065	6:49753164:A:G	ENSG00000124490_CRISP2.9282.12.3_sun_pQTL	ENSG00000124490_CRISP2.9282.12.3_COVID_D1_h	rs478328	-0.117714	0.0467761	-0.209393	-0.0260343	0.0118515	Not assessed	Not assessed
7396	0.00770804	0.557533	0.00359532	0.259883	0.17128	11:124660768:T:C	ENSG00000110013_SIAE.9263.57.3_sun_pQTL	ENSG00000110013_SIAE.9263.57.3_COVID_B1_h	rs78778622	-0.671802	0.305003	-1.2696	-0.074007	0.0276224	Not assessed	Not assessed
6808	0.235827	0.293232	0.133833	0.166239	0.170869	1:104217790:G:A	ENSG00000185946_RNPC3.12814.17.3_sun_pQTL	ENSG00000185946_RNPC3.12814.17.3_COVID_B1_h	rs6661610	1.73775	0.439474	0.876394	2.5991	7.68059e-05	Not assessed	Not assessed
5645	0.0062468	0.622508	0.00199648	0.198783	0.170465	12:7548660:C:T	ENSG00000177575_CD163.5028.59.1_sun_pQTL	ENSG00000177575_CD163.5028.59.1_COVID_A2_h	rs7487589	0.718123	0.298285	0.133494	1.30275	0.016062	Not assessed	Not assessed
6086	4.99469e-05	0.474411	3.75858e-05	0.356833	0.168668	19:47867143:G:T	ENSG00000105398_SULT2A1.9829.91.3_sun_pQTL	ENSG00000105398_SULT2A1.9829.91.3_COVID_A1_h	rs296384	-2.33655	0.984388	-4.26591	-0.407182	0.0176154	Not assessed	Not assessed
5763	0.289534	0.149404	0.259829	0.133909	0.167324	7:99599778:A:G	ENSG00000077454_LRCH4.8984.28.3_sun_pQTL	ENSG00000077454_LRCH4.8984.28.3_COVID_B1_h	rs1011024	2.30272	0.536831	1.25055	3.35489	1.79097e-05	Not assessed	Not assessed
4576	0.0190478	0.518034	0.0105784	0.287532	0.164808	3:52476576:G:A	ENSG00000010322_NISCH.12738.43.3_sun_pQTL	ENSG00000010322_NISCH.12738.43.3_COVID_D1_h	rs9856575	0.539996	0.216333	0.115991	0.964	0.0125555	Not assessed	Not assessed
7179	0.0264201	0.517435	0.0141808	0.277566	0.164398	6:38707877:G:C	ENSG00000124767_GLO1.9883.29.3_sun_pQTL	ENSG00000124767_GLO1.9883.29.3_COVID_A2_h	rs1781733	-0.79991	0.293649	-1.37545	-0.224369	0.00644896	Not assessed	Not assessed
6578	0.129767	0.444056	0.05947	0.20334	0.163368	1:58930934:G:A	ENSG00000177606_JUN.10356.21.3_sun_pQTL	ENSG00000177606_JUN.10356.21.3_COVID_B2_h	rs56251271	0.580504	0.201193	0.186173	0.974834	0.00391029	Not assessed	Not assessed
6938	1.29894e-23	0.676514	3.11879e-24	0.162271	0.161215	17:82331408:A:G	ENSG00000141574_SECTM1.13093.6.3_sun_pQTL	ENSG00000141574_SECTM1.13093.6.3_COVID_C2_h	rs4789763	-0.129743	0.0491622	-0.226099	-0.0333872	0.00831298	Not assessed	Not assessed
4844	1.07558e-114	0.539823	5.97877e-115	0.299907	0.16027	10:50267849:A:C	ENSG00000188611_ASAH2.3212.30.3_sun_pQTL	ENSG00000188611_ASAH2.3212.30.3_COVID_A1_h	rs10740617	-0.687817	0.302701	-1.2811	-0.0945345	0.0230703	Not assessed	Not assessed
8055	4.10864e-100	0.599098	1.65165e-100	0.240674	0.160228	19:8056212:G:A	ENSG00000131142_CCL25.2705.5.2_sun_pQTL	ENSG00000131142_CCL25.2705.5.2_COVID_C2_h	rs74959615	0.0618759	0.0246172	0.0136271	0.110125	0.0119532	Not assessed	Not assessed
6451	3.56019e-47	0.57669	1.62869e-47	0.26366	0.159651	8:11847939:G:A	ENSG00000164733_CTSB.3061.61.2_sun_pQTL	ENSG00000164733_CTSB.3061.61.2_COVID_B2_h	rs1692819	0.143613	0.0576401	0.0306402	0.256585	0.012719	Not assessed	Not assessed
6391	0.253626	0.373096	0.0870634	0.127916	0.158298	20:45845988:C:T	ENSG00000064601_CTSA.3179.51.2_sun_pQTL	ENSG00000064601_CTSA.3179.51.2_COVID_D1_h	rs147171454	-0.731741	0.267598	-1.25622	-0.207259	0.00624789	Not assessed	Not assessed
7601	0.130358	0.355553	0.095977	0.261623	0.156489	3:112340076:A:T	ENSG00000091972_CD200.5112.73.3_sun_pQTL	ENSG00000091972_CD200.5112.73.3_COVID_A2_h	rs9834347	-0.8864	0.287816	-1.45051	-0.322291	0.00207178	Not assessed	Not assessed
8076	6.66167e-05	3.01514e-05	0.580952	0.262789	0.156162	9:133257521:T:TC	ENSG00000148290_SURF1.8009.121.3_sun_pQTL	ENSG00000148290_SURF1.8009.121.3_COVID_C2_h	rs8176719	1.60512	0.247856	1.11933	2.09091	9.41746e-11	Not assessed	Not assessed
4736	0.0017611	0.569915	0.000841846	0.272277	0.155205	17:41970120:G:A	ENSG00000173786_CNP.6609.22.3_sun_pQTL	ENSG00000173786_CNP.6609.22.3_COVID_A1_h	rs55955100	1.96167	1.09151	-0.177653	4.101	0.072303	Not assessed	Not assessed
10066	0.217247	0.244857	0.180395	0.203168	0.154333	9:9902210:CATGA:C	ENSG00000153707_PTPRD.9296.15.3_sun_pQTL	ENSG00000153707_PTPRD.9296.15.3_COVID_A2_h	rs143874184	-1.20062	0.387627	-1.96035	-0.440883	0.00195256	Not assessed	Not assessed
7044	0.242439	0.331956	0.114756	0.156975	0.153873	22:37140682:A:ATGATGGT	ENSG00000100385_IL2RB.9343.16.3_sun_pQTL	ENSG00000100385_IL2RB.9343.16.3_COVID_B2_h	rs71296616	-0.897446	0.255386	-1.39799	-0.396898	0.000441291	Not assessed	Not assessed
5436	0.378189	0.171506	0.204643	0.0926514	0.15301	12:110843817:C:T	ENSG00000196510_ANAPC7.11690.47.3_sun_pQTL	ENSG00000196510_ANAPC7.11690.47.3_COVID_D1_h	rs11065730	0.91944	0.26906	0.392092	1.44679	0.000632621	Not assessed	Not assessed
4357	1.71349e-10	0.576013	8.07621e-11	0.271341	0.152645	3:66093:T:C	ENSG00000134121_CHL1.3601.54.3_sun_pQTL	ENSG00000134121_CHL1.3601.54.3_COVID_A1_h	rs1015456	1.54625	0.707781	0.159028	2.93348	0.0289145	Not assessed	Not assessed
9279	4.08673e-62	0.513186	2.66748e-62	0.334813	0.152001	21:41349942:C:T	ENSG00000183844_FAM3B.9177.6.3_sun_pQTL	ENSG00000183844_FAM3B.9177.6.3_COVID_B1_h	rs73226194	0.138886	0.0629822	0.0154437	0.262329	0.0274421	Not assessed	Not assessed
6668	0.339237	0.302191	0.109558	0.097442	0.151573	21:28061018:C:T	ENSG00000156239_N6AMT1.11096.57.3_sun_pQTL	ENSG00000156239_N6AMT1.11096.57.3_COVID_B2_h	rs2831443	0.810109	0.250052	0.320016	1.3002	0.00119629	Not assessed	Not assessed
6019	1.07004e-177	0.532669	6.36592e-178	0.316746	0.150584	2:85708059:A:G	ENSG00000115523_GNLY.3195.50.2_sun_pQTL	ENSG00000115523_GNLY.3195.50.2_COVID_A1_h	rs7603438	0.490913	0.221584	0.0566157	0.92521	0.0267279	Not assessed	Not assessed
7895	0.005133	0.00225101	0.585971	0.25682	0.149825	9:133257521:T:TC	ENSG00000148290_SURF1.8009.121.3_sun_pQTL	ENSG00000148290_SURF1.8009.121.3_COVID_B2_h	rs8176719	2.3192	0.407216	1.52107	3.11733	1.23186e-08	Not assessed	Not assessed
6518	3.46276e-58	0.485577	2.60729e-58	0.365467	0.148956	8:62990567:G:A	ENSG00000137563_GGH.9370.69.3_sun_pQTL	ENSG00000137563_GGH.9370.69.3_COVID_B1_h	rs4739036	-0.267622	0.103013	-0.469523	-0.0657199	0.00937846	Not assessed	Not assessed
6218	7.66832e-16	0.500739	5.38338e-16	0.351385	0.147877	1:67423888:C:G	ENSG00000081985_IL12RB2.3815.14.1_sun_pQTL	ENSG00000081985_IL12RB2.3815.14.1_COVID_A1_h	rs12566098	-1.3516	0.623637	-2.5739	-0.12929	0.0302135	Not assessed	Not assessed
6973	2.90204e-11	0.574776	1.4097e-11	0.279058	0.146166	17:52136371:G:A	ENSG00000154975_CA10.13666.222.3_sun_pQTL	ENSG00000154975_CA10.13666.222.3_COVID_A2_h	rs117399000	-0.279896	0.130443	-0.535559	-0.0242323	0.0318942	Not assessed	Not assessed
4420	0	0.576878	0	0.278521	0.144601	1:154452980:G:A	ENSG00000160712_IL6R.4139.71.2_sun_pQTL	ENSG00000160712_IL6R.4139.71.2_COVID_C2_h	rs12126142	-0.0330728	0.0119137	-0.0564232	-0.0097223	0.00550284	Not assessed	Not assessed
5824	9.16459e-05	0.701738	2.01947e-05	0.154488	0.143663	10:87414976:T:G	ENSG00000107789_MINPP1.5586.66.3_sun_pQTL	ENSG00000107789_MINPP1.5586.66.3_COVID_C2_h	rs3128161	0.332056	0.100551	0.13498	0.529131	0.000958691	Not assessed	Not assessed
3348	3.36487e-07	0.692151	8.04392e-08	0.16532	0.142528	1:119811396:C:T	ENSG00000134193_REG4.11102.22.3_sun_pQTL	ENSG00000134193_REG4.11102.22.3_COVID_D1_h	rs2298069	-0.340078	0.149367	-0.632832	-0.0473243	0.0227984	Not assessed	Not assessed
4420	0	0.579197	0	0.279608	0.141195	1:154453788:C:T	ENSG00000160712_IL6R.8092.29.3_sun_pQTL	ENSG00000160712_IL6R.8092.29.3_COVID_C2_h	rs4129267	-0.0322507	0.0119741	-0.0557195	-0.00878203	0.00707304	Not assessed	Not assessed
7726	0.00769673	0.516897	0.00490611	0.329343	0.141157	8:23777367:T:C	ENSG00000159167_STC1.4930.21.1_sun_pQTL	ENSG00000159167_STC1.4930.21.1_COVID_B2_h	rs310274	-0.446704	0.171169	-0.782188	-0.11122	0.00906137	Not assessed	Not assessed
5623	1.30626e-21	0.618994	5.06629e-22	0.239933	0.141073	13:52397382:C:T	ENSG00000136114_THSD1.5621.64.3_sun_pQTL	ENSG00000136114_THSD1.5621.64.3_COVID_B2_h	rs41292808	0.154542	0.0744685	0.0085869	0.300498	0.0379612	Not assessed	Not assessed
7369	5.13247e-17	0.53247	3.14962e-17	0.326618	0.140913	5:55971986:T:C	ENSG00000134352_IL6ST.2620.4.2_sun_pQTL	ENSG00000134352_IL6ST.2620.4.2_COVID_B1_h	rs11741953	-0.414905	0.161415	-0.731272	-0.0985383	0.0101572	Not assessed	Not assessed
6929	2.57245e-11	0.509934	1.7653e-11	0.349794	0.140272	17:52136371:G:A	ENSG00000154975_CA10.13666.222.3_sun_pQTL	ENSG00000154975_CA10.13666.222.3_COVID_D1_h	rs117399000	0.330931	0.152775	0.0314979	0.630364	0.0303008	Not assessed	Not assessed
5840	2.10469e-15	0.606877	8.77778e-16	0.252962	0.14016	22:20421266:G:T	ENSG00000244486_SCARF2.8956.96.3_sun_pQTL	ENSG00000244486_SCARF2.8956.96.3_COVID_D1_h	rs738086	-0.2698	0.113824	-0.49289	-0.0467092	0.0177723	Not assessed	Not assessed
6823	0.000216131	0.585718	0.000101373	0.274582	0.139383	1:179020329:G:A	ENSG00000116199_FAM20B.7198.197.3_sun_pQTL	ENSG00000116199_FAM20B.7198.197.3_COVID_B1_h	rs7520456	0.657493	0.262724	0.142563	1.17242	0.0123285	Not assessed	Not assessed
9595	5.08214e-48	0.500348	3.67188e-48	0.361366	0.138286	8:6880706:T:A	ENSG00000164825_DEFB1.6629.3.3_sun_pQTL	ENSG00000164825_DEFB1.6629.3.3_COVID_B1_h	rs2738176	0.227385	0.105613	0.0203881	0.434382	0.0313179	Not assessed	Not assessed
5785	0.302192	0.302023	0.129444	0.129234	0.137106	6:43440367:C:T	ENSG00000171462_DLK2.9359.9.3_sun_pQTL	ENSG00000171462_DLK2.9359.9.3_COVID_A2_h	rs67861980	-0.875779	0.268235	-1.40151	-0.350047	0.00109478	Not assessed	Not assessed
2564	1.1938e-06	0.695322	2.91194e-07	0.169469	0.135207	2:88124547:T:C	ENSG00000163586_FABP1.11516.7.3_sun_pQTL	ENSG00000163586_FABP1.11516.7.3_COVID_A1_h	rs2241883	1.65769	0.821785	0.0470217	3.26836	0.0436764	Not assessed	Not assessed
6544	1.4558e-19	0.592643	6.69601e-20	0.272454	0.134902	1:160705479:G:C	ENSG00000117091_CD48.3292.75.1_sun_pQTL	ENSG00000117091_CD48.3292.75.1_COVID_B1_h	rs12124234	0.380068	0.16526	0.0561654	0.703971	0.0214581	Not assessed	Not assessed
8878	0.122685	0.0684759	0.432845	0.241455	0.134539	16:89127307:A:G	ENSG00000129910_CDH15.5410.53.3_sun_pQTL	ENSG00000129910_CDH15.5410.53.3_COVID_A2_h	rs4782434	2.07886	0.450185	1.19652	2.96121	3.8783e-06	Not assessed	Not assessed
3926	3.91261e-14	0.69627	9.57873e-15	0.170325	0.133405	10:73909432:G:T	ENSG00000122861_PLAU.4158.54.2_sun_pQTL	ENSG00000122861_PLAU.4158.54.2_COVID_D1_h	rs2227551	-0.246386	0.119877	-0.48134	-0.0114318	0.0398474	Not assessed	Not assessed
6679	1.12677e-23	0.587214	5.36744e-24	0.27959	0.133196	17:82331408:A:G	ENSG00000141574_SECTM1.13093.6.3_sun_pQTL	ENSG00000141574_SECTM1.13093.6.3_COVID_B2_h	rs4789763	-0.215176	0.0883815	-0.388401	-0.041952	0.0149069	Not assessed	Not assessed
7142	1.76547e-40	0.656194	5.67465e-41	0.210783	0.133023	6:36871822:C:G	ENSG00000137168_PPIL1.9884.8.3_sun_pQTL	ENSG00000137168_PPIL1.9884.8.3_COVID_C1_h	rs12194408	-0.101872	0.0485027	-0.196935	-0.00680804	0.0357	Not assessed	Not assessed
7661	0.000110159	0.53648	6.78949e-05	0.33052	0.132821	20:1026987:C:T	ENSG00000101282_RSPO4.8464.31.3_sun_pQTL	ENSG00000101282_RSPO4.8464.31.3_COVID_D1_h	rs6039500	0.472948	0.179764	0.120617	0.82528	0.00851504	Not assessed	Not assessed
6447	0.0264748	0.380201	0.0300024	0.430727	0.132595	17:45679100:T:C	ENSG00000073969_NSF.13992.12.3_sun_pQTL	ENSG00000073969_NSF.13992.12.3_COVID_C1_h	rs757503	-0.702379	0.209366	-1.11273	-0.29203	0.000794241	Not assessed	Not assessed
6376	3.56676e-34	0.615191	1.46767e-34	0.25301	0.1318	11:33736224:G:A	ENSG00000085063_CD59.11514.196.3_sun_pQTL	ENSG00000085063_CD59.11514.196.3_COVID_A2_h	rs2273121	-0.216713	0.0932845	-0.399547	-0.0338784	0.0201718	Not assessed	Not assessed
7389	0.000787196	0.591157	0.000368413	0.276534	0.131154	11:20364060:G:A	ENSG00000109854_HTATIP2.10630.5.3_sun_pQTL	ENSG00000109854_HTATIP2.10630.5.3_COVID_D1_h	rs10437608	0.478754	0.198837	0.0890412	0.868467	0.0160501	Not assessed	Not assessed
5868	0.424565	0.209559	0.158256	0.0779831	0.129638	16:49879860:C:G	ENSG00000205423_CNEP1R1.13532.25.3_sun_pQTL	ENSG00000205423_CNEP1R1.13532.25.3_COVID_D1_h	rs17284349	-0.988302	0.291407	-1.55945	-0.417154	0.000695159	Not assessed	Not assessed
4387	2.98326e-28	0.673159	8.79164e-29	0.198251	0.12859	10:75159132:C:T	ENSG00000079393_DUSP13.6525.17.3_sun_pQTL	ENSG00000079393_DUSP13.6525.17.3_COVID_A2_h	rs2804522	-0.2249	0.0913442	-0.403931	-0.0458685	0.0138121	Not assessed	Not assessed
4662	1.05797e-210	0.553139	6.09347e-211	0.318455	0.128406	2:135860235:C:T	ENSG00000115850_LCT.9017.58.3_sun_pQTL	ENSG00000115850_LCT.9017.58.3_COVID_B1_h	rs160329	-0.274653	0.0867804	-0.44474	-0.104567	0.00155125	Not assessed	Not assessed
7195	2.88214e-07	0.547167	1.71188e-07	0.324868	0.127964	5:38907320:C:T	ENSG00000145623_OSMR.10892.8.3_sun_pQTL	ENSG00000145623_OSMR.10892.8.3_COVID_A2_h	rs357253	-0.372331	0.156999	-0.680043	-0.0646197	0.0177132	Not assessed	Not assessed
4151	9.54003e-08	0.703981	2.28401e-08	0.168415	0.127604	11:66008958:T:C	ENSG00000175315_CST6.14711.27.3_sun_pQTL	ENSG00000175315_CST6.14711.27.3_COVID_A2_h	rs12577165	0.318239	0.147611	0.0289275	0.60755	0.0310887	Not assessed	Not assessed
6799	0	0.547653	0	0.325559	0.126788	1:161671594:G:A	ENSG00000072694_FCGR2B.3310.62.1_sun_pQTL	ENSG00000072694_FCGR2B.3310.62.1_COVID_D1_h	rs6665610	-0.0820784	0.0374714	-0.155521	-0.00863576	0.0284933	Not assessed	Not assessed
7202	2.46947e-07	0.648029	8.59203e-08	0.225343	0.126628	19:45317925:T:C	ENSG00000104879_CKM.2670.67.4_sun_pQTL	ENSG00000104879_CKM.2670.67.4_COVID_C1_h	rs11559024	-0.185843	0.0912286	-0.364648	-0.00703782	0.0416391	Not assessed	Not assessed
7565	2.70899e-05	0.489299	2.12706e-05	0.384063	0.126589	3:60956759:A:T	ENSG00000189283_FHIT.9826.135.3_sun_pQTL	ENSG00000189283_FHIT.9826.135.3_COVID_A1_h	rs34894181	1.93616	0.908972	0.154608	3.71771	0.0331671	Not assessed	Not assessed
4150	1.36558e-08	0.704849	3.26819e-09	0.168562	0.126589	11:66008958:T:C	ENSG00000175315_CST6.3303.23.2_sun_pQTL	ENSG00000175315_CST6.3303.23.2_COVID_A2_h	rs12577165	0.305377	0.141645	0.0277584	0.582996	0.0310887	Not assessed	Not assessed
7207	0.0282047	0.552831	0.0142453	0.279093	0.125626	6:38707877:G:C	ENSG00000124767_GLO1.9883.29.3_sun_pQTL	ENSG00000124767_GLO1.9883.29.3_COVID_B2_h	rs1781733	-0.53578	0.203298	-0.934236	-0.137323	0.00840283	Not assessed	Not assessed
4553	2.97348e-52	0.695305	7.66903e-53	0.179204	0.125492	1:196998224:G:A	ENSG00000134389_CFHR5.3666.17.4_sun_pQTL	ENSG00000134389_CFHR5.3666.17.4_COVID_C1_h	rs35662416	-0.0865772	0.041978	-0.168853	-0.00430186	0.0391656	Not assessed	Not assessed
7813	2.75825e-07	0.351871	4.09956e-07	0.522858	0.12527	10:43148018:A:G	ENSG00000169826_CSGALNACT2.10772.21.3_sun_pQTL	ENSG00000169826_CSGALNACT2.10772.21.3_COVID_A2_h	rs2435349	0.546711	0.209663	0.135778	0.957644	0.0091189	Not assessed	Not assessed
6250	0.402046	0.252743	0.135315	0.0849401	0.124955	9:98332390:T:C	ENSG00000106803_SEC61B.7878.2.3_sun_pQTL	ENSG00000106803_SEC61B.7878.2.3_COVID_C2_h	rs28653687	-0.435983	0.121907	-0.674916	-0.19705	0.000348406	Not assessed	Not assessed
5559	3.80565e-102	0.588374	1.85807e-102	0.287142	0.124484	3:123121029:G:A	ENSG00000065485_PDIA5.5593.11.3_sun_pQTL	ENSG00000065485_PDIA5.5593.11.3_COVID_A1_h	rs3792366	0.534724	0.278599	-0.0113192	1.08077	0.054942	Not assessed	Not assessed
6706	2.89839e-46	0.589146	1.40948e-46	0.286377	0.124477	3:12035510:T:C	ENSG00000157150_TIMP4.6462.12.3_sun_pQTL	ENSG00000157150_TIMP4.6462.12.3_COVID_A2_h	rs454615	-0.172998	0.0798756	-0.329551	-0.0164449	0.030323	Not assessed	Not assessed
5886	1.89273e-42	0.561778	1.0584e-42	0.314019	0.124203	17:7544971:C:G	ENSG00000239697_TNFSF12.5939.42.3_sun_pQTL	ENSG00000239697_TNFSF12.5939.42.3_COVID_A1_h	rs12941509	-0.872438	0.438266	-1.73142	-0.0134529	0.0465183	Not assessed	Not assessed
6795	1.96707e-15	0.537001	1.243e-15	0.33921	0.123788	8:27953109:C:T	ENSG00000168079_SCARA5.10419.1.3_sun_pQTL	ENSG00000168079_SCARA5.10419.1.3_COVID_A2_h	rs939715	-0.321706	0.125169	-0.567032	-0.0763798	0.0101646	Not assessed	Not assessed
6497	1.76761e-48	0.651623	6.11448e-49	0.225285	0.123093	19:44909976:G:T	ENSG00000130203_APOE.2937.10.2_sun_pQTL	ENSG00000130203_APOE.2937.10.2_COVID_B2_h	rs1065853	0.15742	0.0667133	0.0266643	0.288176	0.0182923	Not assessed	Not assessed
5460	1.20929e-10	0.574818	6.36298e-11	0.302333	0.122849	9:136967018:T:C	ENSG00000107317_PTGDS.10514.5.3_sun_pQTL	ENSG00000107317_PTGDS.10514.5.3_COVID_A1_h	rs7019538	-1.55104	0.761698	-3.04394	-0.0581356	0.0417215	Not assessed	Not assessed
7062	0.395181	0.220277	0.168375	0.0937313	0.122435	17:6155104:G:A	ENSG00000132514_CLEC10A.10955.4.3_sun_pQTL	ENSG00000132514_CLEC10A.10955.4.3_COVID_D1_h	rs8068390	0.858756	0.26243	0.344402	1.37311	0.00106669	Not assessed	Not assessed
8517	5.35367e-28	0.509635	3.87564e-28	0.368815	0.12155	19:51142883:G:C	ENSG00000168995_SIGLEC7.2742.68.2_sun_pQTL	ENSG00000168995_SIGLEC7.2742.68.2_COVID_B1_h	rs140185670	-0.362555	0.177599	-0.710643	-0.0144679	0.0412083	Not assessed	Not assessed
6724	9.66929e-05	0.593313	4.64676e-05	0.285006	0.121538	3:186575346:C:T	ENSG00000090520_DNAJB11.7110.2.3_sun_pQTL	ENSG00000090520_DNAJB11.7110.2.3_COVID_D1_h	rs9841006	0.476417	0.19	0.104024	0.848811	0.0121602	Not assessed	Not assessed
6027	5.90069e-74	0.692455	1.58883e-74	0.18633	0.121215	14:74020818:G:A	ENSG00000187097_ENTPD5.4437.56.3_sun_pQTL	ENSG00000187097_ENTPD5.4437.56.3_COVID_B2_h	rs57731447	-0.0808409	0.0411223	-0.161439	-0.000242772	0.0493139	Not assessed	Not assessed
7070	3.24961e-36	0.606073	1.47199e-36	0.274416	0.11951	10:89009208:A:G	ENSG00000026103_FAS.9459.7.3_sun_pQTL	ENSG00000026103_FAS.9459.7.3_COVID_B2_h	rs7911226	0.147172	0.0611151	0.027389	0.266956	0.016035	Not assessed	Not assessed
5316	0.000761987	0.587644	0.000378512	0.291788	0.119428	1:72156971:T:C	ENSG00000172260_NEGR1.7050.5.3_sun_pQTL	ENSG00000172260_NEGR1.7050.5.3_COVID_B1_h	rs12568918	-1.17987	0.443343	-2.04881	-0.310934	0.00778385	Not assessed	Not assessed
7837	0.00970908	0.652874	0.0031982	0.214939	0.119279	8:23777367:T:C	ENSG00000159167_STC1.4930.21.1_sun_pQTL	ENSG00000159167_STC1.4930.21.1_COVID_C2_h	rs310274	-0.251721	0.0955493	-0.438995	-0.0644482	0.00842697	Not assessed	Not assessed
4713	9.89599e-09	0.617613	4.21944e-09	0.263218	0.119169	15:74319440:A:T	ENSG00000167178_ISLR2.13124.20.3_sun_pQTL	ENSG00000167178_ISLR2.13124.20.3_COVID_A1_h	rs2959011	-1.55929	0.746616	-3.02263	-0.0959521	0.0367546	Not assessed	Not assessed
4106	1.08452e-12	0.719508	2.43347e-13	0.161325	0.119167	11:66567837:T:C	ENSG00000174080_CTSF.9212.22.3_sun_pQTL	ENSG00000174080_CTSF.9212.22.3_COVID_C1_h	rs2242663	0.204874	0.0727828	0.0622223	0.347525	0.00487972	Not assessed	Not assessed
6198	3.18492e-12	0.559076	1.84131e-12	0.323102	0.117822	2:102165189:C:G	ENSG00000115598_IL1RL2.2994.71.2_sun_pQTL	ENSG00000115598_IL1RL2.2994.71.2_COVID_B1_h	rs2228139	-0.435138	0.183095	-0.793997	-0.0762784	0.0174745	Not assessed	Not assessed
5599	1.33402e-21	0.631744	5.29782e-22	0.250768	0.117489	13:52397382:C:T	ENSG00000136114_THSD1.5621.64.3_sun_pQTL	ENSG00000136114_THSD1.5621.64.3_COVID_A2_h	rs41292808	0.174335	0.0953262	-0.012501	0.361171	0.0674258	Not assessed	Not assessed
7198	4.72036e-05	0.559878	2.72116e-05	0.322637	0.11741	11:130104033:A:G	ENSG00000084234_APLP2.10627.87.3_sun_pQTL	ENSG00000084234_APLP2.10627.87.3_COVID_A2_h	rs6590438	0.332882	0.150185	0.0385252	0.62724	0.0266585	Not assessed	Not assessed
7736	2.43523e-12	0.287504	5.0438e-12	0.595353	0.117143	5:39345204:G:T	ENSG00000113600_C9.3060.43.2_sun_pQTL	ENSG00000113600_C9.3060.43.2_COVID_C1_h	rs62358364	-0.226721	0.0879047	-0.399011	-0.0544312	0.0099038	Not assessed	Not assessed
7362	3.35241e-11	0.560435	1.93654e-11	0.323622	0.115943	15:79910564:C:T	ENSG00000136371_MTHFS.14107.1.3_sun_pQTL	ENSG00000136371_MTHFS.14107.1.3_COVID_B1_h	rs6495456	0.54361	0.198995	0.153586	0.933633	0.00629943	Not assessed	Not assessed
7768	1.87555e-100	0.627643	7.66625e-101	0.256431	0.115925	11:102867344:T:C	ENSG00000262406_MMP12.4496.60.2_sun_pQTL	ENSG00000262406_MMP12.4496.60.2_COVID_D1_h	rs17368582	0.171493	0.0798139	0.0150604	0.327925	0.0316615	Not assessed	Not assessed
4825	0.000409603	0.711884	9.88492e-05	0.171682	0.115925	12:56100038:A:C	ENSG00000065361_ERBB3.2617.56.35_sun_pQTL	ENSG00000065361_ERBB3.2617.56.35_COVID_D1_h	rs2292238	0.476061	0.181838	0.119665	0.832456	0.00884335	Not assessed	Not assessed
6649	1.47346e-88	0.639963	5.62405e-89	0.244152	0.115885	1:204976550:A:AT	ENSG00000163531_NFASC.7179.69.3_sun_pQTL	ENSG00000163531_NFASC.7179.69.3_COVID_D1_h	rs58682625	-0.24497	0.0930401	-0.427325	-0.0626148	0.00846465	Not assessed	Not assessed
7857	0.152877	0.429052	0.0794269	0.222797	0.115847	18:59121671:T:TC	ENSG00000166562_SEC11C.10658.28.3_sun_pQTL	ENSG00000166562_SEC11C.10658.28.3_COVID_A2_h	rs11413439	-1.03981	0.346856	-1.71964	-0.359989	0.00271911	Not assessed	Not assessed
8082	0	0.628036	0	0.256909	0.115056	3:98790861:G:A	ENSG00000064225_ST3GAL6.6947.4.3_sun_pQTL	ENSG00000064225_ST3GAL6.6947.4.3_COVID_A2_h	rs72934623	-0.0704429	0.0334242	-0.135953	-0.00493272	0.0350705	Not assessed	Not assessed
7591	7.67409e-43	0.609542	3.47099e-43	0.275581	0.114877	8:56964017:T:C	ENSG00000104331_IMPAD1.9231.23.3_sun_pQTL	ENSG00000104331_IMPAD1.9231.23.3_COVID_D1_h	rs112433249	-0.161655	0.0859801	-0.330172	0.00686329	0.060089	Not assessed	Not assessed
4656	7.48755e-65	0.609083	3.39609e-65	0.276144	0.114773	1:52597887:C:A	ENSG00000116157_GPX7.8345.27.3_sun_pQTL	ENSG00000116157_GPX7.8345.27.3_COVID_A1_h	rs1097234	0.703604	0.357678	0.00256783	1.40464	0.0491667	Not assessed	Not assessed
5385	8.75817e-230	0.567624	4.90433e-230	0.317739	0.114636	19:40769143:T:C	ENSG00000261857_MIA.2687.2.1_sun_pQTL	ENSG00000261857_MIA.2687.2.1_COVID_A1_h	rs2604877	0.442159	0.191725	0.0663844	0.817933	0.0210988	Not assessed	Not assessed
6581	0	0.590058	0	0.295409	0.114533	11:118206239:C:G	ENSG00000160593_AMICA1.8232.90.3_sun_pQTL	ENSG00000160593_AMICA1.8232.90.3_COVID_B2_h	rs11600544	-0.0632166	0.0243667	-0.110974	-0.0154587	0.00947611	Not assessed	Not assessed
8355	5.1455e-06	0.608655	2.34602e-06	0.277393	0.113945	16:1369946:A:G	ENSG00000090581_GNPTG.10666.7.3_sun_pQTL	ENSG00000090581_GNPTG.10666.7.3_COVID_B2_h	rs11248874	-0.354148	0.16641	-0.680307	-0.0279899	0.0333237	Not assessed	Not assessed
6163	0.201329	0.342006	0.127087	0.215775	0.113802	7:149912859:C:T	ENSG00000214022_REPIN1.13554.78.3_sun_pQTL	ENSG00000214022_REPIN1.13554.78.3_COVID_A1_h	rs4725321	4.09309	1.68521	0.790144	7.39604	0.0151475	Not assessed	Not assessed
6945	2.62524e-15	0.716822	6.21486e-16	0.169583	0.113595	8:27953109:C:T	ENSG00000168079_SCARA5.10419.1.3_sun_pQTL	ENSG00000168079_SCARA5.10419.1.3_COVID_C2_h	rs939715	-0.156279	0.0561404	-0.266312	-0.0462461	0.00537393	Not assessed	Not assessed
5275	0.0693078	0.493907	0.0398343	0.283757	0.113194	11:48696197:A:G	ENSG00000149177_PTPRJ.8250.2.3_sun_pQTL	ENSG00000149177_PTPRJ.8250.2.3_COVID_D1_h	rs1827970	0.934072	0.33788	0.27184	1.5963	0.00570085	Not assessed	Not assessed
5312	0.000459412	0.592471	0.000228126	0.294085	0.112756	1:72156971:T:C	ENSG00000172260_NEGR1.13109.82.3_sun_pQTL	ENSG00000172260_NEGR1.13109.82.3_COVID_B1_h	rs12568918	-1.1648	0.437679	-2.02263	-0.306962	0.00778385	Not assessed	Not assessed
7133	9.38833e-180	0.624606	3.9541e-180	0.262953	0.112441	20:24921760:A:C	ENSG00000077984_CST7.3302.58.1_sun_pQTL	ENSG00000077984_CST7.3302.58.1_COVID_B1_h	rs2094935	-0.151041	0.064859	-0.278162	-0.0239198	0.0198717	Not assessed	Not assessed
6353	0.0669724	0.535304	0.0317359	0.253549	0.112439	11:115206607:A:G	ENSG00000182985_CADM1.3326.58.2_sun_pQTL	ENSG00000182985_CADM1.3326.58.2_COVID_A2_h	rs11215416	-0.607697	0.240831	-1.07972	-0.135676	0.011625	Not assessed	Not assessed
6411	0.000844369	0.598393	0.000406737	0.288137	0.112219	1:204179521:G:A	ENSG00000143839_REN.3396.54.2_sun_pQTL	ENSG00000143839_REN.3396.54.2_COVID_A2_h	rs193280350	-0.326966	0.165652	-0.651638	-0.00229473	0.0484026	Not assessed	Not assessed
7108	2.5622e-57	0.527309	1.75242e-57	0.360543	0.112149	17:1762959:C:T	ENSG00000132386_SERPINF1.7735.17.3_sun_pQTL	ENSG00000132386_SERPINF1.7735.17.3_COVID_A1_h	rs62088172	0.711765	0.35761	0.0108626	1.41267	0.0465536	Not assessed	Not assessed
7004	2.368e-10	0.595912	1.16068e-10	0.291976	0.112112	8:61705821:T:G	ENSG00000198363_ASPH.6998.106.3_sun_pQTL	ENSG00000198363_ASPH.6998.106.3_COVID_B1_h	rs112448656	0.541551	0.224726	0.101095	0.982006	0.0159603	Not assessed	Not assessed
7111	1.21679e-62	0.527423	8.32483e-63	0.360732	0.111845	17:1762959:C:T	ENSG00000132386_SERPINF1.9211.19.3_sun_pQTL	ENSG00000132386_SERPINF1.9211.19.3_COVID_A1_h	rs62088172	0.685367	0.344347	0.0104597	1.36028	0.0465536	Not assessed	Not assessed
7630	0.00835106	0.557633	0.00475635	0.317488	0.111771	8:23777367:T:C	ENSG00000159167_STC1.4930.21.1_sun_pQTL	ENSG00000159167_STC1.4930.21.1_COVID_A2_h	rs310274	-0.57429	0.263597	-1.09093	-0.0576492	0.0293565	Not assessed	Not assessed
5280	0	0.581373	0	0.307764	0.110863	22:17105741:G:A	ENSG00000177663_IL17RA.2992.59.2_sun_pQTL	ENSG00000177663_IL17RA.2992.59.2_COVID_A1_h	rs4819959	-0.335817	0.175501	-0.679793	0.00815934	0.0556876	Not assessed	Not assessed
4729	0.0788251	0.625653	0.0206801	0.164032	0.11081	17:42112643:C:G	ENSG00000108771_DHX58.14012.17.3_sun_pQTL	ENSG00000108771_DHX58.14012.17.3_COVID_C1_h	rs2277621	-0.308418	0.125982	-0.555339	-0.0614979	0.0143607	Not assessed	Not assessed
6090	9.71924e-230	0.615911	4.31831e-230	0.273542	0.110548	19:40769143:T:C	ENSG00000261857_MIA.2687.2.1_sun_pQTL	ENSG00000261857_MIA.2687.2.1_COVID_A2_h	rs2604877	-0.076819	0.0374558	-0.150231	-0.00340705	0.0402742	Not assessed	Not assessed
6434	0.00090183	0.637809	0.00035448	0.250591	0.110343	1:204179521:G:A	ENSG00000143839_REN.3396.54.2_sun_pQTL	ENSG00000143839_REN.3396.54.2_COVID_D1_h	rs193280350	0.237167	0.129836	-0.0173059	0.491641	0.0677489	Not assessed	Not assessed
2868	1.12552e-17	0.753465	2.03819e-18	0.136333	0.110202	10:46241058:A:G	ENSG00000263639_MSMB.10620.21.3_sun_pQTL	ENSG00000263639_MSMB.10620.21.3_COVID_B1_h	rs75735517	-0.339862	0.188189	-0.708706	0.0289816	0.0709244	Not assessed	Not assessed
10106	0.268018	0.302963	0.149801	0.169222	0.109996	9:9903101:G:A	ENSG00000153707_PTPRD.9296.15.3_sun_pQTL	ENSG00000153707_PTPRD.9296.15.3_COVID_B2_h	rs16924754	-0.702208	0.230835	-1.15464	-0.249781	0.00234981	Not assessed	Not assessed
6835	1.39755e-21	0.536367	9.22769e-22	0.35404	0.109593	9:33113324:C:T	ENSG00000086062_B4GALT1.13381.49.3_sun_pQTL	ENSG00000086062_B4GALT1.13381.49.3_COVID_D1_h	rs7019909	0.210911	0.0968133	0.0211605	0.400662	0.0293663	Not assessed	Not assessed
5689	1.35779e-21	0.635108	5.46753e-22	0.255635	0.109257	13:52397382:C:T	ENSG00000136114_THSD1.5621.64.3_sun_pQTL	ENSG00000136114_THSD1.5621.64.3_COVID_B1_h	rs41292808	0.277404	0.152445	-0.0213832	0.576191	0.0688053	Not assessed	Not assessed
7347	0.0345707	0.678637	0.00865023	0.169699	0.108443	6:38707834:G:A	ENSG00000124767_GLO1.9883.29.3_sun_pQTL	ENSG00000124767_GLO1.9883.29.3_COVID_C2_h	rs2490027	-0.314906	0.121051	-0.552163	-0.07765	0.00928367	Not assessed	Not assessed
5264	0.0399944	0.511241	0.0247445	0.316197	0.107822	9:34710087:A:C	ENSG00000137077_CCL21.2516.57.3_sun_pQTL	ENSG00000137077_CCL21.2516.57.3_COVID_D1_h	rs11574915	-0.534438	0.232048	-0.989244	-0.0796316	0.0212714	Not assessed	Not assessed
8112	2.56458e-15	0.587916	1.33179e-15	0.305199	0.106885	9:27196745:G:T	ENSG00000120156_TEK.3773.15.4_sun_pQTL	ENSG00000120156_TEK.3773.15.4_COVID_D1_h	rs116927451	0.446979	0.16802	0.117666	0.776291	0.00780768	Not assessed	Not assessed
5518	2.58672e-29	0.538073	1.70863e-29	0.355313	0.106614	1:43975097:G:C	ENSG00000117411_B4GALT2.9595.11.3_sun_pQTL	ENSG00000117411_B4GALT2.9595.11.3_COVID_B2_h	rs2286241	0.145212	0.0673031	0.0133008	0.277124	0.0309598	Not assessed	Not assessed
7900	7.73456e-18	0.625712	3.31688e-18	0.268224	0.106064	20:1631636:T:G	ENSG00000089012_SIRPG.9241.40.3_sun_pQTL	ENSG00000089012_SIRPG.9241.40.3_COVID_B2_h	rs2147337	-0.267695	0.102863	-0.469303	-0.0660865	0.00925648	Not assessed	Not assessed
4385	0.000112508	0.635195	4.58545e-05	0.258778	0.105869	7:116672385:C:G	ENSG00000105976_MET.2837.3.2_sun_pQTL	ENSG00000105976_MET.2837.3.2_COVID_A1_h	rs1858830	-2.96252	1.50322	-5.90877	-0.0162583	0.0487491	Not assessed	Not assessed
7801	2.15288e-14	0.514437	1.59028e-14	0.379897	0.105666	5:126825998:C:T	ENSG00000113368_LMNB1.3889.64.2_sun_pQTL	ENSG00000113368_LMNB1.3889.64.2_COVID_A2_h	rs36105360	-0.223249	0.113556	-0.445816	-0.000682682	0.0493014	Not assessed	Not assessed
4219	4.50541e-08	0.688511	1.34885e-08	0.206024	0.105465	17:27632329:A:G	ENSG00000168961_LGALS9.9197.4.3_sun_pQTL	ENSG00000168961_LGALS9.9197.4.3_COVID_D1_h	rs3794195	-0.293294	0.149838	-0.586971	0.000383752	0.0503001	Not assessed	Not assessed
6406	3.72148e-62	0.671831	1.23747e-62	0.223293	0.104876	18:31633396:C:CT	ENSG00000118276_B4GALT6.10832.24.3_sun_pQTL	ENSG00000118276_B4GALT6.10832.24.3_COVID_B2_h	rs201022770	0.113126	0.0605019	-0.00545535	0.231708	0.0615122	Not assessed	Not assessed
5102	0	0.553997	0	0.341158	0.104845	6:95575816:T:A	ENSG00000172469_MANEA.8014.359.3_sun_pQTL	ENSG00000172469_MANEA.8014.359.3_COVID_A1_h	rs13205922	-0.329802	0.154164	-0.631959	-0.0276461	0.032412	Not assessed	Not assessed
6121	0.118625	0.470359	0.0617908	0.244902	0.104323	11:72184814:T:A	ENSG00000184276_DEFB108B.5611.56.3_sun_pQTL	ENSG00000184276_DEFB108B.5611.56.3_COVID_A2_h	rs186196629	1.29004	0.336585	0.630347	1.94974	0.000126726	Not assessed	Not assessed
7275	0.00416962	0.571333	0.00232294	0.318192	0.103983	13:37518320:A:G	ENSG00000133110_POSTN.3457.57.1_sun_pQTL	ENSG00000133110_POSTN.3457.57.1_COVID_B1_h	rs973497	-0.763404	0.292893	-1.33746	-0.189345	0.0091492	Not assessed	Not assessed
6273	0.406821	0.231677	0.16423	0.0934222	0.10385	12:86378387:G:A	ENSG00000133636_NTS.7857.22.3_sun_pQTL	ENSG00000133636_NTS.7857.22.3_COVID_A2_h	rs73185476	-1.37339	0.361856	-2.08261	-0.664161	0.00014741	Not assessed	Not assessed
6447	0.0326203	0.510552	0.0212079	0.331829	0.103791	9:86091181:G:A	ENSG00000135052_GOLM1.8983.7.3_sun_pQTL	ENSG00000135052_GOLM1.8983.7.3_COVID_A2_h	rs12235357	-0.621365	0.235074	-1.0821	-0.160628	0.00821085	Not assessed	Not assessed
8002	2.69231e-14	0.644226	1.05506e-14	0.252355	0.10342	5:126825998:C:T	ENSG00000113368_LMNB1.3889.64.2_sun_pQTL	ENSG00000113368_LMNB1.3889.64.2_COVID_C1_h	rs36105360	0.128324	0.0644856	0.0019349	0.254714	0.0465943	Not assessed	Not assessed
7139	1.12954e-39	0.530547	7.8011e-40	0.366315	0.103138	7:49772968:C:A	ENSG00000188730_VWC2.11121.56.3_sun_pQTL	ENSG00000188730_VWC2.11121.56.3_COVID_A1_h	rs79259707	-0.914547	0.441696	-1.78025	-0.0488381	0.0384024	Not assessed	Not assessed
6943	1.2301e-107	0.653304	4.58983e-108	0.243662	0.103034	12:27774948:T:C	ENSG00000205693_MANSC4.9578.263.3_sun_pQTL	ENSG00000205693_MANSC4.9578.263.3_COVID_B2_h	rs36138811	0.107056	0.0478442	0.0132831	0.200829	0.0252475	Not assessed	Not assessed
5938	6.98558e-09	0.553941	4.32882e-09	0.343163	0.102896	10:71771312:A:G	ENSG00000107738_C10orf54.14123.34.3_sun_pQTL	ENSG00000107738_C10orf54.14123.34.3_COVID_A1_h	rs10762477	1.77179	0.819482	0.165637	3.37795	0.0306114	Not assessed	Not assessed
7638	6.06322e-24	0.680594	1.9317e-24	0.21673	0.102676	4:76022794:G:A	ENSG00000169245_CXCL10.4141.79.1_sun_pQTL	ENSG00000169245_CXCL10.4141.79.1_COVID_D1_h	rs11548618	0.132215	0.0778922	-0.020451	0.284881	0.0896194	Not assessed	Not assessed
8701	5.89314e-12	0.672875	1.96748e-12	0.224543	0.102583	10:14820083:C:G	ENSG00000185267_CDNF.4962.52.1_sun_pQTL	ENSG00000185267_CDNF.4962.52.1_COVID_C2_h	rs61738953	-0.131958	0.0639727	-0.257342	-0.00657361	0.0391392	Not assessed	Not assessed
5278	4.35173e-103	0.618668	1.96259e-103	0.278912	0.10242	11:60931260:G:A	ENSG00000006118_TMEM132A.7871.16.3_sun_pQTL	ENSG00000006118_TMEM132A.7871.16.3_COVID_D1_h	rs11230521	0.122502	0.0561334	0.0124821	0.232521	0.0290852	Not assessed	Not assessed
7377	6.48814e-18	0.525099	4.61694e-18	0.373558	0.101343	20:1635560:A:G	ENSG00000089012_SIRPG.9241.40.3_sun_pQTL	ENSG00000089012_SIRPG.9241.40.3_COVID_A1_h	rs6043409	-1.20175	0.660654	-2.49661	0.0931086	0.0689068	Not assessed	Not assessed
6364	1.01735e-29	0.659623	3.69246e-30	0.239309	0.101067	18:47214692:A:G	ENSG00000167220_HDHD2.13472.35.3_sun_pQTL	ENSG00000167220_HDHD2.13472.35.3_COVID_D1_h	rs75228657	0.161273	0.0795029	0.00545046	0.317096	0.0425071	Not assessed	Not assessed
7918	1.08078e-97	0.513876	8.10405e-98	0.38522	0.100904	9:134963026:G:A	ENSG00000085265_FCN1.3613.62.5_sun_pQTL	ENSG00000085265_FCN1.3613.62.5_COVID_A1_h	rs11103602	0.527733	0.269487	-0.000451595	1.05592	0.0501962	Not assessed	Not assessed
6254	0.0749522	0.45186	0.0530587	0.319772	0.100357	13:77930408:G:A	ENSG00000152193_RNF219.8822.163.3_sun_pQTL	ENSG00000152193_RNF219.8822.163.3_COVID_A1_h	rs9544639	3.25199	1.30392	0.69636	5.80762	0.0126306	Not assessed	Not assessed
8857	0.0836927	0.440402	0.0600331	0.315802	0.10007	3:126128625:A:G	ENSG00000144909_OSBPL11.12878.60.3_sun_pQTL	ENSG00000144909_OSBPL11.12878.60.3_COVID_C2_h	rs10934746	0.523802	0.15425	0.221478	0.826126	0.000684266	Not assessed	Not assessed
5711	0.0151493	0.63442	0.00584282	0.244585	0.100003	8:35253275:G:A	ENSG00000156687_UNC5D.8624.16.3_sun_pQTL	ENSG00000156687_UNC5D.8624.16.3_COVID_D1_h	rs34376566	0.602146	0.236702	0.138219	1.06607	0.0109622	Not assessed	Not assessed
5752	0.44975	0.166257	0.207757	0.0767013	0.0995345	1:24048089:A:G	ENSG00000142677_IL22RA1.9603.9.3_sun_pQTL	ENSG00000142677_IL22RA1.9603.9.3_COVID_C1_h	rs12134722	-1.05203	0.247191	-1.53651	-0.567544	2.08171e-05	Not assessed	Not assessed
7235	0.0400731	0.67779	0.0102073	0.172546	0.0993836	1:236110105:G:T	ENSG00000116962_NID1.3213.65.2_sun_pQTL	ENSG00000116962_NID1.3213.65.2_COVID_C2_h	rs74891748	-0.291826	0.100355	-0.488517	-0.0951341	0.00363815	Not assessed	Not assessed
6489	5.6514e-17	0.537513	3.82146e-17	0.363366	0.0991203	5:55983139:A:G	ENSG00000134352_IL6ST.2620.4.2_sun_pQTL	ENSG00000134352_IL6ST.2620.4.2_COVID_A1_h	rs11574765	-1.26563	0.613258	-2.4676	-0.0636703	0.0390379	Not assessed	Not assessed
8977	6.4435e-19	0.503603	5.08516e-19	0.397341	0.0990562	2:240513881:G:A	ENSG00000063660_GPC1.8697.38.3_sun_pQTL	ENSG00000063660_GPC1.8697.38.3_COVID_B1_h	rs60904131	0.368681	0.150531	0.0736455	0.663717	0.0143174	Not assessed	Not assessed
5586	2.79465e-118	0.586265	1.50083e-118	0.314747	0.0989878	20:45508536:A:G	ENSG00000101446_SPINT3.7926.13.3_sun_pQTL	ENSG00000101446_SPINT3.7926.13.3_COVID_A1_h	rs13042504	0.50825	0.275157	-0.0310473	1.04755	0.0647284	Not assessed	Not assessed
5165	9.80465e-33	0.603187	4.84924e-33	0.298229	0.0985841	9:137114298:G:C	ENSG00000176978_DPP7.8346.9.3_sun_pQTL	ENSG00000176978_DPP7.8346.9.3_COVID_A1_h	rs10747049	0.867152	0.46825	-0.0506022	1.78491	0.0640405	Not assessed	Not assessed
7067	6.80569e-27	0.621181	3.08188e-27	0.281197	0.0976216	10:89009208:A:G	ENSG00000026103_FAS.5392.73.2_sun_pQTL	ENSG00000026103_FAS.5392.73.2_COVID_B2_h	rs7911226	0.167459	0.0695395	0.0311644	0.303754	0.016035	Not assessed	Not assessed
6491	0.000795555	0.536756	0.00054017	0.364352	0.0975568	3:113272995:A:G	ENSG00000144857_BOC.4328.2.2_sun_pQTL	ENSG00000144857_BOC.4328.2.2_COVID_A1_h	rs11717833	2.02496	1.01037	0.0446665	4.00525	0.0450516	Not assessed	Not assessed
6945	2.60661e-15	0.711572	6.99935e-16	0.190976	0.0974519	8:27950722:G:A	ENSG00000168079_SCARA5.10419.1.3_sun_pQTL	ENSG00000168079_SCARA5.10419.1.3_COVID_C1_h	rs11994699	-0.173713	0.0672645	-0.305549	-0.0418771	0.00980767	Not assessed	Not assessed
4609	1.54404e-11	0.707562	4.25758e-12	0.195007	0.0974308	3:52443064:T:C	ENSG00000010319_SEMA3G.5628.21.3_sun_pQTL	ENSG00000010319_SEMA3G.5628.21.3_COVID_B2_h	rs2016575	-0.265795	0.112568	-0.486424	-0.0451655	0.0182163	Not assessed	Not assessed
6667	3.40154e-16	0.702353	9.72361e-17	0.200677	0.0969701	17:75144846:G:A	ENSG00000125458_NT5C.12560.9.3_sun_pQTL	ENSG00000125458_NT5C.12560.9.3_COVID_C2_h	rs78625720	-0.119159	0.0610825	-0.238879	0.000560212	0.0510817	Not assessed	Not assessed
9694	3.28268e-08	0.526215	2.35144e-08	0.376839	0.0969468	5:116444277:C:T	ENSG00000092421_SEMA6A.7945.10.3_sun_pQTL	ENSG00000092421_SEMA6A.7945.10.3_COVID_B1_h	rs3733724	0.421503	0.214719	0.000661246	0.842344	0.0496411	Not assessed	Not assessed
7709	3.1153e-17	0.508565	2.41842e-17	0.394704	0.0967316	22:26525759:A:G	ENSG00000128294_TPST2.8024.64.3_sun_pQTL	ENSG00000128294_TPST2.8024.64.3_COVID_A1_h	rs4275	-1.54738	0.661008	-2.84293	-0.251826	0.0192355	Not assessed	Not assessed
6268	2.07025e-109	0.664989	7.4319e-110	0.238625	0.0963858	2:151280667:C:T	ENSG00000123610_TNFAIP6.5036.50.1_sun_pQTL	ENSG00000123610_TNFAIP6.5036.50.1_COVID_D1_h	rs289828	0.108916	0.04904	0.0127993	0.205032	0.0263536	Not assessed	Not assessed
6956	0.000723611	0.543426	0.000478455	0.35922	0.0961515	11:20358417:C:G	ENSG00000109854_HTATIP2.10630.5.3_sun_pQTL	ENSG00000109854_HTATIP2.10630.5.3_COVID_A1_h	rs11025525	-1.88497	0.999112	-3.8432	0.0732509	0.0592077	Not assessed	Not assessed
7553	0.0275104	0.563579	0.0145619	0.29822	0.0961288	12:104298293:A:C	ENSG00000198431_TXNRD1.13967.14.3_sun_pQTL	ENSG00000198431_TXNRD1.13967.14.3_COVID_A2_h	rs34621285	-0.483957	0.221438	-0.917968	-0.049946	0.028851	Not assessed	Not assessed
8044	5.35299e-06	0.575031	3.06386e-06	0.329032	0.0959288	2:54135508:T:C	ENSG00000170634_ACYP2.12812.25.3_sun_pQTL	ENSG00000170634_ACYP2.12812.25.3_COVID_A2_h	rs78531993	0.297857	0.156348	-0.0085804	0.604294	0.0567692	Not assessed	Not assessed
8511	0	0.524509	0	0.379604	0.0958868	19:51225221:C:T	ENSG00000105383_CD33.3166.92.1_sun_pQTL	ENSG00000105383_CD33.3166.92.1_COVID_B1_h	rs12459419	0.100216	0.0474375	0.00724045	0.193192	0.0346354	Not assessed	Not assessed
6515	1.28382e-28	0.655617	4.86978e-29	0.248593	0.0957905	22:20187330:C:A	ENSG00000040608_RTN4R.5105.2.3_sun_pQTL	ENSG00000040608_RTN4R.5105.2.3_COVID_C1_h	rs75766	0.118774	0.0493568	0.0220361	0.215511	0.0161093	Not assessed	Not assessed
4261	0.35384	0.0840035	0.377034	0.0894143	0.0957084	12:132709505:G:A	ENSG00000256223_ZNF10.11567.23.3_sun_pQTL	ENSG00000256223_ZNF10.11567.23.3_COVID_C1_h	rs112393608	1.00518	0.236932	0.540807	1.46956	2.21038e-05	Not assessed	Not assessed
3951	0.00477726	0.698105	0.00137185	0.200374	0.0953721	3:50163356:T:C	ENSG00000114378_HYAL1.8309.12.3_sun_pQTL	ENSG00000114378_HYAL1.8309.12.3_COVID_B2_h	rs13069856	0.396645	0.176814	0.0500952	0.743194	0.0248784	Not assessed	Not assessed
4262	1.19942e-210	0.630731	5.21143e-211	0.273955	0.0953143	2:135649909:A:G	ENSG00000115850_LCT.9017.58.3_sun_pQTL	ENSG00000115850_LCT.9017.58.3_COVID_A1_h	rs1446585	-0.42342	0.218511	-0.851693	0.00485421	0.0526538	Not assessed	Not assessed
6138	0.000267282	0.629475	0.000116792	0.274961	0.0951796	5:177324058:G:A	ENSG00000169223_LMAN2.9468.8.3_sun_pQTL	ENSG00000169223_LMAN2.9468.8.3_COVID_B1_h	rs151014368	0.681182	0.322722	0.048658	1.31371	0.0347949	Not assessed	Not assessed
7403	1.1286e-08	0.709865	3.105e-09	0.195203	0.0949313	11:34377638:G:T	ENSG00000121691_CAT.3488.64.2_sun_pQTL	ENSG00000121691_CAT.3488.64.2_COVID_C2_h	rs2745924	0.178083	0.0676505	0.0454909	0.310676	0.00847828	Not assessed	Not assessed
6448	3.81248e-34	0.657737	1.43494e-34	0.247464	0.0947994	11:33736224:G:A	ENSG00000085063_CD59.11514.196.3_sun_pQTL	ENSG00000085063_CD59.11514.196.3_COVID_B2_h	rs2273121	-0.160978	0.0718066	-0.301716	-0.0202395	0.0249727	Not assessed	Not assessed
6876	0.0141668	0.54251	0.00887218	0.33966	0.0947913	14:92893065:T:A	ENSG00000100604_CHGA.8476.11.3_sun_pQTL	ENSG00000100604_CHGA.8476.11.3_COVID_A1_h	rs7147814	-2.31115	1.15273	-4.57047	-0.0518412	0.0449698	Not assessed	Not assessed
7666	0.0834657	0.557618	0.0344084	0.229781	0.094727	1:158217359:A:G	ENSG00000162706_CADM3.3630.27.4_sun_pQTL	ENSG00000162706_CADM3.3630.27.4_COVID_B2_h	rs200398009	-0.890664	0.317752	-1.51345	-0.267881	0.00506278	Not assessed	Not assessed
6844	1.18447e-10	0.618206	5.50436e-11	0.287193	0.0946016	3:120450401:C:T	ENSG00000163430_FSTL1.13112.179.3_sun_pQTL	ENSG00000163430_FSTL1.13112.179.3_COVID_A2_h	rs1147707	-0.382243	0.183857	-0.742597	-0.02189	0.0376152	Not assessed	Not assessed
6016	4.67035e-27	0.554181	2.96281e-27	0.351471	0.0943477	5:159365298:A:G	ENSG00000113302_IL12B.IL23A.10365.132.3_sun_pQTL	ENSG00000113302_IL12B.IL23A.10365.132.3_COVID_A1_h	rs4921223	-0.994568	0.517326	-2.00851	0.0193719	0.0545406	Not assessed	Not assessed
6069	1.1767e-07	0.655306	4.49858e-08	0.250433	0.0942608	1:175599911:A:G	ENSG00000116147_TNR.11302.237.3_sun_pQTL	ENSG00000116147_TNR.11302.237.3_COVID_A2_h	rs2235256	0.448321	0.202305	0.0518107	0.844831	0.026687	Not assessed	Not assessed
6963	1.57506e-08	0.583862	8.68621e-09	0.321896	0.0942423	18:62387624:A:C	ENSG00000141655_TNFRSF11A.8256.57.3_sun_pQTL	ENSG00000141655_TNFRSF11A.8256.57.3_COVID_A2_h	rs884205	-0.412626	0.198474	-0.801629	-0.023624	0.0376181	Not assessed	Not assessed
7099	5.81922e-24	0.641587	2.40221e-24	0.264757	0.0936566	4:176729712:C:T	ENSG00000150630_VEGFC.3132.1.1_sun_pQTL	ENSG00000150630_VEGFC.3132.1.1_COVID_D1_h	rs41278571	0.113614	0.0673174	-0.0183258	0.245554	0.0914622	Not assessed	Not assessed
4943	5.00889e-07	0.609413	2.44429e-07	0.297295	0.0932915	11:16836252:C:T	ENSG00000166689_PLEKHA7.12731.12.3_sun_pQTL	ENSG00000166689_PLEKHA7.12731.12.3_COVID_A1_h	rs382280	1.52682	0.849584	-0.138339	3.19197	0.0723145	Not assessed	Not assessed
6602	0	0.618042	0	0.288947	0.0930105	1:160750284:C:T	ENSG00000026751_SLAMF7.5487.7.3_sun_pQTL	ENSG00000026751_SLAMF7.5487.7.3_COVID_B1_h	rs11581248	0.100992	0.0545495	-0.00592275	0.207907	0.0641137	Not assessed	Not assessed
6284	1.43494e-19	0.559146	8.93269e-20	0.347982	0.0928712	1:160705479:G:C	ENSG00000117091_CD48.3292.75.1_sun_pQTL	ENSG00000117091_CD48.3292.75.1_COVID_D1_h	rs12124234	-0.268931	0.114096	-0.492556	-0.0453069	0.0184204	Not assessed	Not assessed
7358	0.0029687	0.717277	0.000770785	0.186139	0.0928447	14:50921416:C:T	ENSG00000100504_PYGL.11441.11.3_sun_pQTL	ENSG00000100504_PYGL.11441.11.3_COVID_C2_h	rs144359893	-0.173083	0.0849725	-0.339626	-0.00653961	0.0416575	Not assessed	Not assessed
6736	5.47687e-78	0.526344	3.96675e-78	0.381124	0.0925326	13:46777887:G:C	ENSG00000139684_ESD.4984.83.1_sun_pQTL	ENSG00000139684_ESD.4984.83.1_COVID_A1_h	rs1216956	-0.650673	0.311211	-1.26063	-0.0407108	0.036548	Not assessed	Not assessed
11678	0.180548	0.146578	0.32037	0.26	0.0925045	16:9640920:A:C	ENSG00000153048_CARHSP1.12808.103.3_sun_pQTL	ENSG00000153048_CARHSP1.12808.103.3_COVID_C1_h	rs78101397	-0.771469	0.160551	-1.08614	-0.456794	1.54654e-06	Not assessed	Not assessed
8195	0	0.681778	0	0.226235	0.0919867	3:98790861:G:A	ENSG00000064225_ST3GAL6.6947.4.3_sun_pQTL	ENSG00000064225_ST3GAL6.6947.4.3_COVID_B2_h	rs72934623	-0.0484327	0.0244607	-0.0963748	-0.000490596	0.0477012	Not assessed	Not assessed
6047	1.3461e-96	0.536568	9.33576e-97	0.372041	0.0913907	4:87541577:G:A	ENSG00000152583_SPARCL1.4467.49.2_sun_pQTL	ENSG00000152583_SPARCL1.4467.49.2_COVID_A1_h	rs7681694	0.570386	0.313246	-0.0435643	1.18434	0.0686236	Not assessed	Not assessed
6258	0.364514	0.229557	0.193142	0.121543	0.0912443	9:98332390:T:C	ENSG00000106803_SEC61B.7878.2.3_sun_pQTL	ENSG00000106803_SEC61B.7878.2.3_COVID_C1_h	rs28653687	-0.522917	0.152006	-0.820844	-0.22499	0.000581504	Not assessed	Not assessed
5612	1.97438e-54	0.617443	9.31882e-55	0.291333	0.0912239	20:38340105:T:C	ENSG00000101425_BPI.4126.22.1_sun_pQTL	ENSG00000101425_BPI.4126.22.1_COVID_A2_h	rs77603326	0.144832	0.0662514	0.0149816	0.274682	0.0288085	Not assessed	Not assessed
6951	1.27034e-85	0.610653	6.20543e-86	0.298205	0.0911418	4:17518443:C:T	ENSG00000151552_QDPR.11257.1.3_sun_pQTL	ENSG00000151552_QDPR.11257.1.3_COVID_D1_h	rs28719835	0.116755	0.0547071	0.00953147	0.223979	0.0328271	Not assessed	Not assessed
4163	0.107071	0.626071	0.0256822	0.150079	0.0910964	11:65947454:C:T	ENSG00000175376_EIF1AD.13545.97.3_sun_pQTL	ENSG00000175376_EIF1AD.13545.97.3_COVID_A2_h	rs565921	0.327703	0.223455	-0.110261	0.765666	0.142504	Not assessed	Not assessed
6088	0.22903	0.321964	0.148813	0.209106	0.0910878	14:104077788:A:T	ENSG00000185100_ADSSL1.13998.26.3_sun_pQTL	ENSG00000185100_ADSSL1.13998.26.3_COVID_B1_h	rs113809287	1.16961	0.588486	0.0162033	2.32302	0.0468672	Not assessed	Not assessed
5949	6.43738e-34	0.518179	4.86394e-34	0.391433	0.090388	12:7102090:G:C	ENSG00000139178_C1RL.9348.1.3_sun_pQTL	ENSG00000139178_C1RL.9348.1.3_COVID_D1_h	rs191448232	0.124415	0.0683779	-0.00960314	0.258433	0.0688318	Not assessed	Not assessed
6789	0.107764	0.0457877	0.530744	0.225417	0.0902873	12:7270611:C:T	ENSG00000065970_FOXJ2.14204.55.3_sun_pQTL	ENSG00000065970_FOXJ2.14204.55.3_COVID_C1_h	rs111654488	1.30775	0.280083	0.758794	1.8567	3.02471e-06	Not assessed	Not assessed
7213	0.108684	0.486757	0.0574025	0.256997	0.09016	5:42622683:A:G	ENSG00000151882_CCL28.2890.59.2_sun_pQTL	ENSG00000151882_CCL28.2890.59.2_COVID_B1_h	rs77918486	-1.69606	0.510348	-2.69632	-0.695792	0.000889491	Not assessed	Not assessed
5099	0.0182685	0.585303	0.00927823	0.297174	0.0899765	11:45711342:C:T	ENSG00000175264_CHST1.7803.4.3_sun_pQTL	ENSG00000175264_CHST1.7803.4.3_COVID_A1_h	rs4756020	-2.09021	1.06525	-4.17807	-0.00235888	0.0497417	Not assessed	Not assessed
6180	1.74444e-22	0.534097	1.22941e-22	0.376321	0.0895816	4:87388983:A:G	ENSG00000170502_NUDT9.9482.110.3_sun_pQTL	ENSG00000170502_NUDT9.9482.110.3_COVID_A1_h	rs28696943	-1.16298	0.595715	-2.33056	0.00460134	0.0509097	Not assessed	Not assessed
3897	0.002086	0.657142	0.000795649	0.25056	0.0894167	7:100073309:T:C	ENSG00000160862_AZGP1.9312.8.3_sun_pQTL	ENSG00000160862_AZGP1.9312.8.3_COVID_A1_h	rs13232115	1.37295	1.05631	-0.697372	3.44328	0.193681	Not assessed	Not assessed
3772	9.33155e-06	0.663965	3.46716e-06	0.246609	0.0894134	17:62559897:C:A	ENSG00000011028_MRC2.3041.55.2_sun_pQTL	ENSG00000011028_MRC2.3041.55.2_COVID_A1_h	rs146385050	-1.68149	1.02925	-3.69878	0.335804	0.102321	Not assessed	Not assessed
6685	9.98052e-13	0.533435	7.0601e-13	0.377256	0.0893093	3:148844612:G:A	ENSG00000153002_CPB1.6356.3.3_sun_pQTL	ENSG00000153002_CPB1.6356.3.3_COVID_A1_h	rs13318853	1.32517	0.715529	-0.0772446	2.72758	0.0640245	Not assessed	Not assessed
6515	1.23824e-86	0.683459	4.12106e-87	0.227377	0.0891639	19:43321342:G:C	ENSG00000204936_CD177.13116.25.3_sun_pQTL	ENSG00000204936_CD177.13116.25.3_COVID_B2_h	rs73554000	-0.0739851	0.042978	-0.158221	0.0102503	0.0851667	Not assessed	Not assessed
7477	5.94091e-07	0.631519	2.62885e-07	0.279358	0.0891221	14:79120593:G:A	ENSG00000021645_NRXN3.5111.15.3_sun_pQTL	ENSG00000021645_NRXN3.5111.15.3_COVID_C2_h	rs2620398	-0.233994	0.0799696	-0.390731	-0.0772564	0.00343312	Not assessed	Not assessed
6947	3.1946e-11	0.632579	1.40649e-11	0.278417	0.0890041	17:52136371:G:A	ENSG00000154975_CA10.13666.222.3_sun_pQTL	ENSG00000154975_CA10.13666.222.3_COVID_B2_h	rs117399000	-0.202408	0.108517	-0.415096	0.0102808	0.0621499	Not assessed	Not assessed
4424	0.1478	0.0469204	0.543873	0.172568	0.088839	7:99418168:T:C	ENSG00000160868_CYP3A4.7879.12.3_sun_pQTL	ENSG00000160868_CYP3A4.7879.12.3_COVID_B1_h	rs2003498	-1.67934	0.431956	-2.52596	-0.832721	0.000101176	Not assessed	Not assessed
5097	9.08348e-49	0.610713	4.47165e-49	0.300555	0.0887324	6:42972935:A:G	ENSG00000124713_GNMT.14006.36.3_sun_pQTL	ENSG00000124713_GNMT.14006.36.3_COVID_A1_h	rs2395943	-0.679183	0.387987	-1.43962	0.0812578	0.080027	Not assessed	Not assessed
4900	1.9994e-10	0.608964	9.93465e-11	0.302494	0.0885423	11:73403678:A:G	ENSG00000054967_RELT.14112.40.3_sun_pQTL	ENSG00000054967_RELT.14112.40.3_COVID_A1_h	rs3741148	1.16398	0.732465	-0.271626	2.59958	0.112032	Not assessed	Not assessed
5592	3.17795e-29	0.661782	1.19951e-29	0.2497	0.0885185	1:43975097:G:C	ENSG00000117411_B4GALT2.9595.11.3_sun_pQTL	ENSG00000117411_B4GALT2.9595.11.3_COVID_B1_h	rs2286241	0.236954	0.135658	-0.0289313	0.502839	0.0806898	Not assessed	Not assessed
6081	1.35766e-05	0.644882	5.61423e-06	0.266585	0.0885131	5:133197371:A:T	ENSG00000053108_FSTL4.9350.3.3_sun_pQTL	ENSG00000053108_FSTL4.9350.3.3_COVID_A2_h	rs3749820	0.409906	0.173465	0.0699209	0.749892	0.0181254	Not assessed	Not assessed
8388	0.0361975	0.489293	0.0266056	0.359549	0.0883555	18:10479438:A:G	ENSG00000154856_APCDD1.6599.5.3_sun_pQTL	ENSG00000154856_APCDD1.6599.5.3_COVID_B1_h	rs525355	0.871488	0.361587	0.162791	1.58018	0.0159448	Not assessed	Not assessed
9006	4.54885e-38	0.479632	4.09885e-38	0.432095	0.0882723	4:6598285:A:G	ENSG00000013288_MAN2B2.9251.28.3_sun_pQTL	ENSG00000013288_MAN2B2.9251.28.3_COVID_A1_h	rs2301790	0.826032	0.442609	-0.0414658	1.69353	0.0620023	Not assessed	Not assessed
4347	0.463916	0.165566	0.208394	0.0742853	0.087839	12:56711235:G:A	ENSG00000166888_STAT6.10372.18.3_sun_pQTL	ENSG00000166888_STAT6.10372.18.3_COVID_C1_h	rs4759031	-0.913616	0.218614	-1.34209	-0.48514	2.92631e-05	Not assessed	Not assessed
7983	0.153262	0.435942	0.0840296	0.238928	0.0878383	18:59122746:C:T	ENSG00000166562_SEC11C.10658.28.3_sun_pQTL	ENSG00000166562_SEC11C.10658.28.3_COVID_B1_h	rs4940838	0.790649	0.347022	0.110499	1.4708	0.0227036	Not assessed	Not assessed
7108	1.98916e-80	0.46348	1.92726e-80	0.448968	0.087552	8:56464222:C:T	ENSG00000181195_PENK.9076.25.3_sun_pQTL	ENSG00000181195_PENK.9076.25.3_COVID_A1_h	rs2670014	0.594799	0.315495	-0.0235605	1.21316	0.0593912	Not assessed	Not assessed
6928	2.49413e-10	0.628352	1.1292e-10	0.284395	0.0872529	8:61627575:G:T	ENSG00000198363_ASPH.6998.106.3_sun_pQTL	ENSG00000198363_ASPH.6998.106.3_COVID_B2_h	rs112760834	0.240698	0.114907	0.0154856	0.465911	0.0361949	Not assessed	Not assessed
6499	0.297121	0.242951	0.205164	0.167672	0.0870919	16:2450070:G:C	ENSG00000167964_RAB26.6997.32.3_sun_pQTL	ENSG00000167964_RAB26.6997.32.3_COVID_D1_h	rs12919892	1.4344	0.405379	0.639875	2.22893	0.000402518	Not assessed	Not assessed
4551	1.32659e-38	0.725882	3.42108e-39	0.187107	0.0870119	1:196334759:T:C	ENSG00000134389_CFHR5.7885.17.3_sun_pQTL	ENSG00000134389_CFHR5.7885.17.3_COVID_C1_h	rs72732234	-0.0807068	0.0477153	-0.174227	0.0128135	0.0907559	Not assessed	Not assessed
7919	1.81286e-19	0.533311	1.29172e-19	0.379915	0.0867737	7:23273552:T:C	ENSG00000136235_GPNMB.8606.39.3_sun_pQTL	ENSG00000136235_GPNMB.8606.39.3_COVID_B1_h	rs2268748	0.266264	0.148573	-0.0249341	0.557462	0.0731105	Not assessed	Not assessed
5788	1.79452e-17	0.643365	7.53827e-18	0.270173	0.0864616	5:95682148:T:G	ENSG00000175449_RFESD.13603.7.3_sun_pQTL	ENSG00000175449_RFESD.13603.7.3_COVID_A2_h	rs77881626	0.218168	0.117833	-0.0127808	0.449117	0.0640978	Not assessed	Not assessed
5120	1.1828e-108	0.690389	3.82495e-109	0.223172	0.0864387	1:45585381:G:A	ENSG00000117448_AKR1A1.4192.10.2_sun_pQTL	ENSG00000117448_AKR1A1.4192.10.2_COVID_B1_h	rs72688441	0.133814	0.0830661	-0.028993	0.29662	0.107195	Not assessed	Not assessed
5830	0	0.58386	0	0.329761	0.0863787	19:10285007:A:G	ENSG00000090339_ICAM1.4342.10.3_sun_pQTL	ENSG00000090339_ICAM1.4342.10.3_COVID_A1_h	rs5498	0.214448	0.127669	-0.0357795	0.464675	0.0930133	Not assessed	Not assessed
7313	2.16473e-06	0.716628	5.95323e-07	0.196994	0.0863755	12:28138135:C:T	ENSG00000087494_PTHLH.2962.50.2_sun_pQTL	ENSG00000087494_PTHLH.2962.50.2_COVID_C1_h	rs11049364	0.238492	0.0905063	0.0611029	0.415881	0.00841158	Not assessed	Not assessed
4430	2.87128e-52	0.667251	1.06155e-52	0.246606	0.0861431	1:196998224:G:A	ENSG00000134389_CFHR5.3666.17.4_sun_pQTL	ENSG00000134389_CFHR5.3666.17.4_COVID_A2_h	rs35662416	0.154433	0.0972505	-0.0361748	0.34504	0.112289	Not assessed	Not assessed
7968	4.63824e-06	0.597209	2.46111e-06	0.316801	0.0859824	17:4923297:G:T	ENSG00000185245_GP1BA.4990.87.1_sun_pQTL	ENSG00000185245_GP1BA.4990.87.1_COVID_B1_h	rs72835078	-0.4758	0.273091	-1.01105	0.0594475	0.0814595	Not assessed	Not assessed
7837	0.332513	0.202813	0.235462	0.143532	0.0856807	4:100295020:G:C	ENSG00000196616_ADH1B.9834.62.3_sun_pQTL	ENSG00000196616_ADH1B.9834.62.3_COVID_C2_h	rs6837913	0.871565	0.198307	0.482891	1.26024	1.10753e-05	Not assessed	Not assessed
7561	0.189147	0.140028	0.336287	0.248872	0.0856662	5:128475543:G:A	ENSG00000066583_ISOC1.9816.37.3_sun_pQTL	ENSG00000066583_ISOC1.9816.37.3_COVID_B1_h	rs1435512	-2.59842	0.625163	-3.82372	-1.37313	3.23306e-05	Not assessed	Not assessed
6843	0.0901461	0.0507802	0.494896	0.278694	0.0854831	11:14244913:A:G	ENSG00000152266_PTH.5954.62.3_sun_pQTL	ENSG00000152266_PTH.5954.62.3_COVID_B2_h	rs10734222	-2.03922	0.408914	-2.84067	-1.23776	6.1354e-07	Not assessed	Not assessed
9730	3.79857e-63	0.523251	2.84535e-63	0.39186	0.0848892	4:7432729:A:G	ENSG00000178597_PSAPL1.8814.33.3_sun_pQTL	ENSG00000178597_PSAPL1.8814.33.3_COVID_A2_h	rs10023470	-0.14247	0.0658767	-0.271586	-0.0133545	0.0305656	Not assessed	Not assessed
6489	0.101357	0.46098	0.063636	0.289337	0.0846901	17:34225244:A:G	ENSG00000172156_CCL11.5301.7.3_sun_pQTL	ENSG00000172156_CCL11.5301.7.3_COVID_A1_h	rs11080264	-3.34746	1.77299	-6.82246	0.127533	0.0590216	Not assessed	Not assessed
16810	3.55296e-91	0.288795	7.7092e-91	0.626542	0.0846627	6:31506180:C:G	ENSG00000204516_MICB.5102.55.3_sun_pQTL	ENSG00000204516_MICB.5102.55.3_COVID_A1_h	rs3134900	1.02304	0.380787	0.276707	1.76936	0.00721758	Not assessed	Not assessed
7893	2.54369e-14	0.608648	1.28238e-14	0.30676	0.0845913	5:126825998:C:T	ENSG00000113368_LMNB1.3889.64.2_sun_pQTL	ENSG00000113368_LMNB1.3889.64.2_COVID_B2_h	rs36105360	-0.158614	0.0886192	-0.332305	0.0150762	0.0734796	Not assessed	Not assessed
6183	5.09878e-44	0.558898	3.25678e-44	0.356904	0.0841979	17:9083080:G:A	ENSG00000065320_NTN1.6649.51.3_sun_pQTL	ENSG00000065320_NTN1.6649.51.3_COVID_A1_h	rs72809988	0.704492	0.381807	-0.0438363	1.45282	0.0650155	Not assessed	Not assessed
6546	3.99944e-30	0.567777	2.45521e-30	0.348468	0.0837554	4:109735574:G:A	ENSG00000205403_CFI.2567.5.6_sun_pQTL	ENSG00000205403_CFI.2567.5.6_COVID_A2_h	rs7439493	0.250789	0.120982	0.0136691	0.48791	0.0381771	Not assessed	Not assessed
7142	6.02939e-24	0.657424	2.37499e-24	0.258877	0.0836998	4:176729712:C:T	ENSG00000150630_VEGFC.3132.1.1_sun_pQTL	ENSG00000150630_VEGFC.3132.1.1_COVID_A2_h	rs41278571	-0.177871	0.115888	-0.405007	0.0492648	0.124819	Not assessed	Not assessed
6273	1.24251e-28	0.634284	5.52638e-29	0.28203	0.0836855	22:20187436:C:T	ENSG00000040608_RTN4R.5105.2.3_sun_pQTL	ENSG00000040608_RTN4R.5105.2.3_COVID_D1_h	rs75765	0.179511	0.0863358	0.0102958	0.348726	0.0375974	Not assessed	Not assessed
4991	0.0922238	0.512835	0.0475081	0.264098	0.0833342	12:55578626:A:G	ENSG00000135404_CD63.9190.7.3_sun_pQTL	ENSG00000135404_CD63.9190.7.3_COVID_A1_h	rs10876817	-3.51836	1.52509	-6.50747	-0.52924	0.0210556	Not assessed	Not assessed
7701	2.91815e-76	0.572687	1.75395e-76	0.344128	0.0831857	6:41198413:A:G	ENSG00000112195_TREML2.5736.1.3_sun_pQTL	ENSG00000112195_TREML2.5736.1.3_COVID_B1_h	rs61998254	0.191872	0.105955	-0.0157955	0.39954	0.0701585	Not assessed	Not assessed
6226	1.62322e-104	0.665747	6.13255e-105	0.251438	0.0828156	4:102713063:C:T	ENSG00000109323_MANBA.6382.17.3_sun_pQTL	ENSG00000109323_MANBA.6382.17.3_COVID_B1_h	rs223505	-0.193085	0.0996524	-0.3884	0.00223037	0.0526742	Not assessed	Not assessed
6926	8.05978e-09	0.594285	4.3823e-09	0.323045	0.0826695	10:125786516:A:G	ENSG00000188690_UROS.11248.43.3_sun_pQTL	ENSG00000188690_UROS.11248.43.3_COVID_B1_h	rs11244645	0.550561	0.226734	0.10617	0.994951	0.015173	Not assessed	Not assessed
6520	0.165819	0.107816	0.390164	0.253604	0.082597	6:47897593:A:G	ENSG00000146072_TNFRSF21.9259.35.3_sun_pQTL	ENSG00000146072_TNFRSF21.9259.35.3_COVID_A2_h	rs4715051	-2.04951	0.452827	-2.93703	-1.16199	6.01007e-06	Not assessed	Not assessed
7357	0.265551	0.343548	0.134487	0.173906	0.0825076	22:35516268:A:G	ENSG00000100320_RBFOX2.11462.8.3_sun_pQTL	ENSG00000100320_RBFOX2.11462.8.3_COVID_B2_h	rs151240537	0.531937	0.201059	0.137869	0.926005	0.00815267	Not assessed	Not assessed
3686	0.00261211	0.728257	0.000669078	0.186457	0.0820047	17:19385973:G:C	ENSG00000166482_MFAP4.5636.10.3_sun_pQTL	ENSG00000166482_MFAP4.5636.10.3_COVID_B1_h	rs139356332	-0.589794	0.437301	-1.44689	0.267301	0.177429	Not assessed	Not assessed
7148	5.57094e-21	0.546502	3.7889e-21	0.371604	0.0818948	16:4469438:G:A	ENSG00000153406_NMRAL1.13988.67.3_sun_pQTL	ENSG00000153406_NMRAL1.13988.67.3_COVID_A1_h	rs11557236	1.07435	0.566504	-0.0359739	2.18468	0.0578989	Not assessed	Not assessed
8212	0.364862	0.223951	0.204189	0.125248	0.08175	4:57228720:T:C	ENSG00000128050_PAICS.9841.197.3_sun_pQTL	ENSG00000128050_PAICS.9841.197.3_COVID_B2_h	rs2109589	-0.88534	0.239932	-1.3556	-0.415082	0.000224289	Not assessed	Not assessed
4289	2.77834e-81	0.782881	4.80716e-82	0.135374	0.081745	1:150764744:A:G	ENSG00000163131_CTSS.3181.50.2_sun_pQTL	ENSG00000163131_CTSS.3181.50.2_COVID_C1_h	rs41271951	-0.0697432	0.0349262	-0.138197	-0.00128907	0.0458391	Not assessed	Not assessed
6463	0.014543	0.528927	0.0100323	0.364794	0.0817037	12:108620180:G:A	ENSG00000110876_SELPLG.11266.8.3_sun_pQTL	ENSG00000110876_SELPLG.11266.8.3_COVID_A1_h	rs73191242	1.92877	1.08491	-0.19761	4.05516	0.0754334	Not assessed	Not assessed
10415	0.256716	0.17857	0.284915	0.198103	0.081696	16:9630208:G:C	ENSG00000153048_CARHSP1.12808.103.3_sun_pQTL	ENSG00000153048_CARHSP1.12808.103.3_COVID_A1_h	rs149066025	8.26992	1.97334	4.40225	12.1376	2.77942e-05	Not assessed	Not assessed
4117	0.00416003	0.656107	0.00162801	0.256684	0.0814208	6:170279471:T:G	ENSG00000198719_DLL1.8264.43.3_sun_pQTL	ENSG00000198719_DLL1.8264.43.3_COVID_A1_h	rs2344744	1.64245	1.04763	-0.410863	3.69576	0.116933	Not assessed	Not assessed
6600	1.3065e-177	0.651142	5.37471e-178	0.267786	0.0810713	2:85708059:A:G	ENSG00000115523_GNLY.3195.50.2_sun_pQTL	ENSG00000115523_GNLY.3195.50.2_COVID_B2_h	rs7603438	-0.0694491	0.0318577	-0.131889	-0.00700918	0.029259	Not assessed	Not assessed
8709	1.24533e-268	0.538556	8.79793e-269	0.380394	0.0810493	2:3592552:C:T	ENSG00000118004_COLEC11.4430.44.3_sun_pQTL	ENSG00000118004_COLEC11.4430.44.3_COVID_B1_h	rs6542680	0.100922	0.0538348	-0.00459241	0.206436	0.0608397	Not assessed	Not assessed
5897	1.18794e-24	0.680455	4.16627e-25	0.238564	0.0809807	1:11859214:A:G	ENSG00000120937_NPPB.7655.11.3_sun_pQTL	ENSG00000120937_NPPB.7655.11.3_COVID_B2_h	rs198389	-0.191472	0.09	-0.367869	-0.0150756	0.033381	Not assessed	Not assessed
7256	1.14209e-26	0.632106	5.1857e-27	0.286929	0.0809646	8:21693256:A:C	ENSG00000168546_GFRA2.2515.14.3_sun_pQTL	ENSG00000168546_GFRA2.2515.14.3_COVID_D1_h	rs15881	-0.194265	0.0901896	-0.371034	-0.0174971	0.0312427	Not assessed	Not assessed
8104	0.115876	0.117083	0.341337	0.344812	0.0808928	14:93943929:CA:C	ENSG00000089723_OTUB2.12493.42.3_sun_pQTL	ENSG00000089723_OTUB2.12493.42.3_COVID_B2_h	rs35894364	1.84827	0.405383	1.05374	2.64281	5.13183e-06	Not assessed	Not assessed
6268	1.61002e-17	0.699249	5.06856e-18	0.220052	0.080699	1:63653675:T:C	ENSG00000079739_PGM1.9173.21.3_sun_pQTL	ENSG00000079739_PGM1.9173.21.3_COVID_D1_h	rs2269233	-0.227548	0.105748	-0.43481	-0.0202854	0.0314137	Not assessed	Not assessed
6341	3.08528e-08	0.654872	1.24691e-08	0.264585	0.0805433	19:43306700:C:G	ENSG00000183668_PSG9.9335.28.3_sun_pQTL	ENSG00000183668_PSG9.9335.28.3_COVID_A2_h	rs2007528	0.444938	0.21079	0.0317977	0.858078	0.0347882	Not assessed	Not assessed
4121	4.1706e-09	0.660732	1.63364e-09	0.258731	0.0805364	6:170279471:T:G	ENSG00000198719_DLL1.5349.69.3_sun_pQTL	ENSG00000198719_DLL1.5349.69.3_COVID_A1_h	rs2344744	1.19717	0.763608	-0.299475	2.69381	0.116933	Not assessed	Not assessed
6992	1.8005e-22	0.550998	1.20491e-22	0.368652	0.0803495	4:87388983:A:G	ENSG00000170502_NUDT9.9482.110.3_sun_pQTL	ENSG00000170502_NUDT9.9482.110.3_COVID_B1_h	rs28696943	-0.263531	0.153856	-0.565084	0.0380211	0.0867415	Not assessed	Not assessed
3200	0.00252789	0.703127	0.00076694	0.213242	0.0803359	17:19385973:G:C	ENSG00000166482_MFAP4.5636.10.3_sun_pQTL	ENSG00000166482_MFAP4.5636.10.3_COVID_A1_h	rs139356332	2.95509	1.41738	0.177073	5.73311	0.037079	Not assessed	Not assessed
6239	2.13645e-07	0.56495	1.34272e-07	0.35498	0.0800699	19:45317925:T:C	ENSG00000104879_CKM.2670.67.4_sun_pQTL	ENSG00000104879_CKM.2670.67.4_COVID_A1_h	rs11559024	-2.79375	0.939481	-4.6351	-0.952404	0.00294214	Not assessed	Not assessed
5637	0.134777	0.522992	0.0537338	0.20843	0.080067	11:72238799:TGAAG:T	ENSG00000184276_DEFB108B.5611.56.3_sun_pQTL	ENSG00000184276_DEFB108B.5611.56.3_COVID_D1_h	rs71726140	-0.654772	0.397092	-1.43306	0.123514	0.0991645	Not assessed	Not assessed
7540	5.60261e-28	0.540047	3.94263e-28	0.379958	0.0799956	19:51142883:G:C	ENSG00000168995_SIGLEC7.2742.68.2_sun_pQTL	ENSG00000168995_SIGLEC7.2742.68.2_COVID_A1_h	rs140185670	-1.07451	0.534768	-2.12264	-0.0263862	0.0445048	Not assessed	Not assessed
6416	0.400139	0.262897	0.155165	0.101865	0.0799341	9:20948312:A:G	ENSG00000147873_IFNA5.6210.100.3_sun_pQTL	ENSG00000147873_IFNA5.6210.100.3_COVID_D1_h	rs35470485	-0.770101	0.262609	-1.2848	-0.255398	0.0033624	Not assessed	Not assessed
7590	7.94246e-43	0.630068	3.6569e-43	0.290019	0.0799134	8:56964017:T:C	ENSG00000104331_IMPAD1.9231.23.3_sun_pQTL	ENSG00000104331_IMPAD1.9231.23.3_COVID_A2_h	rs112433249	0.119582	0.076269	-0.0299026	0.269066	0.116905	Not assessed	Not assessed
6059	0.360542	0.166138	0.269446	0.124081	0.079792	11:17487304:A:T	ENSG00000188211_NCR3LG1.7854.38.3_sun_pQTL	ENSG00000188211_NCR3LG1.7854.38.3_COVID_B1_h	rs6486372	-1.39771	0.391344	-2.16473	-0.630688	0.000354863	Not assessed	Not assessed
5164	0.285774	0.36443	0.118725	0.151323	0.0797484	11:62754191:C:T	ENSG00000133328_HRASLS2.7822.11.3_sun_pQTL	ENSG00000133328_HRASLS2.7822.11.3_COVID_B2_h	rs3829248	0.802336	0.248967	0.314369	1.2903	0.00127007	Not assessed	Not assessed
7211	0.00203114	0.624277	0.000953757	0.293061	0.0796766	14:50921416:C:T	ENSG00000100504_PYGL.11441.11.3_sun_pQTL	ENSG00000100504_PYGL.11441.11.3_COVID_D1_h	rs144359893	0.352973	0.198339	-0.035764	0.74171	0.0751339	Not assessed	Not assessed
5346	0.0019714	0.643872	0.000838116	0.273654	0.0796637	17:41934267:C:T	ENSG00000173786_CNP.6609.22.3_sun_pQTL	ENSG00000173786_CNP.6609.22.3_COVID_B1_h	rs8073987	0.787846	0.412586	-0.0208078	1.5965	0.0561936	Not assessed	Not assessed
8416	0.0304449	0.535337	0.0190887	0.335571	0.079558	2:37309345:G:A	ENSG00000115828_QPCT.7849.3.3_sun_pQTL	ENSG00000115828_QPCT.7849.3.3_COVID_B1_h	rs4670193	-0.898121	0.34912	-1.58238	-0.213858	0.0100959	Not assessed	Not assessed
5848	9.54003e-05	0.718964	2.67409e-05	0.201448	0.0794659	10:87415879:T:C	ENSG00000107789_MINPP1.5586.66.3_sun_pQTL	ENSG00000107789_MINPP1.5586.66.3_COVID_C1_h	rs3128151	0.344424	0.130532	0.0885866	0.600261	0.00832434	Not assessed	Not assessed
6700	0.404197	0.193895	0.218045	0.104518	0.0793457	9:70018672:A:G	ENSG00000135063_FAM189A2.5699.19.3_sun_pQTL	ENSG00000135063_FAM189A2.5699.19.3_COVID_B2_h	rs17522671	-0.843408	0.259709	-1.35243	-0.334388	0.00116418	Not assessed	Not assessed
3433	0.00185076	0.682511	0.000639907	0.235902	0.079097	1:155846294:G:A	ENSG00000132718_SYT11.7089.42.3_sun_pQTL	ENSG00000132718_SYT11.7089.42.3_COVID_A1_h	rs145976521	1.7194	1.10868	-0.453561	3.89237	0.120935	Not assessed	Not assessed
6080	0.364056	0.212617	0.217432	0.126907	0.0789883	3:58081028:A:G	ENSG00000168309_FAM107A.2760.2.2_sun_pQTL	ENSG00000168309_FAM107A.2760.2.2_COVID_B1_h	rs57337941	0.781562	0.209328	0.371287	1.19184	0.000188708	Not assessed	Not assessed
5291	0.365527	0.203461	0.22623	0.125846	0.0789355	5:131988557:C:CTG	ENSG00000113525_IL5.3741.4.3_sun_pQTL	ENSG00000113525_IL5.3741.4.3_COVID_B1_h	rs3043838	2.46551	0.6008	1.28797	3.64306	4.06564e-05	Not assessed	Not assessed
6548	1.31591e-177	0.657551	5.27539e-178	0.263528	0.0789206	2:85708059:A:G	ENSG00000115523_GNLY.3195.50.2_sun_pQTL	ENSG00000115523_GNLY.3195.50.2_COVID_A2_h	rs7603438	-0.0880568	0.0432422	-0.17281	-0.00330371	0.0417138	Not assessed	Not assessed
8029	7.99713e-20	0.590825	4.47421e-20	0.330474	0.0787011	1:157809392:T:A	ENSG00000163534_FCRL1.5728.60.3_sun_pQTL	ENSG00000163534_FCRL1.5728.60.3_COVID_B1_h	rs4971155	-0.373969	0.174138	-0.715273	-0.032666	0.0317494	Not assessed	Not assessed
6613	0	0.445357	0	0.476139	0.078504	1:160750284:C:T	ENSG00000026751_SLAMF7.5487.7.3_sun_pQTL	ENSG00000026751_SLAMF7.5487.7.3_COVID_C1_h	rs11581248	-0.0471914	0.0204247	-0.0872231	-0.00715971	0.0208602	Not assessed	Not assessed
7208	2.45057e-06	0.574761	1.47956e-06	0.346941	0.0782943	9:91883689:T:A	ENSG00000169071_ROR2.7861.9.3_sun_pQTL	ENSG00000169071_ROR2.7861.9.3_COVID_D1_h	rs1534533	-0.542096	0.181004	-0.896857	-0.187334	0.00274502	Not assessed	Not assessed
7795	1.60067e-167	0.494026	1.38628e-167	0.427779	0.0781945	19:51024108:G:A	ENSG00000167757_KLK11.2831.29.1_sun_pQTL	ENSG00000167757_KLK11.2831.29.1_COVID_A2_h	rs1048328	-0.114267	0.0614592	-0.234724	0.00619123	0.062995	Not assessed	Not assessed
3923	0.0263637	0.683453	0.00788474	0.204326	0.0779719	1:150578851:G:A	ENSG00000143384_MCL1.10358.33.3_sun_pQTL	ENSG00000143384_MCL1.10358.33.3_COVID_B1_h	rs11580946	0.508369	0.3497	-0.177032	1.19377	0.146022	Not assessed	Not assessed
7721	4.85709e-16	0.618986	2.37977e-16	0.303199	0.0778147	14:20965208:A:C	ENSG00000169385_RNASE2.8394.56.3_sun_pQTL	ENSG00000169385_RNASE2.8394.56.3_COVID_A2_h	rs56204594	-0.311898	0.155862	-0.617382	-0.00641339	0.0453803	Not assessed	Not assessed
7866	4.33554e-12	0.496801	3.71458e-12	0.425569	0.0776298	10:14820083:C:G	ENSG00000185267_CDNF.4962.52.1_sun_pQTL	ENSG00000185267_CDNF.4962.52.1_COVID_A1_h	rs61738953	1.38069	0.603321	0.198205	2.56318	0.0221092	Not assessed	Not assessed
7008	9.85267e-05	0.68297	3.45287e-05	0.23927	0.0776271	4:1729894:T:C	ENSG00000068078_FGFR3.13669.6.3_sun_pQTL	ENSG00000068078_FGFR3.13669.6.3_COVID_A2_h	rs798763	-0.60418	0.244418	-1.08323	-0.12513	0.0134392	Not assessed	Not assessed
4248	0.397673	0.0938635	0.348773	0.0822443	0.0774462	12:132709505:G:A	ENSG00000256223_ZNF10.11567.23.3_sun_pQTL	ENSG00000256223_ZNF10.11567.23.3_COVID_C2_h	rs112393608	0.910085	0.223601	0.471836	1.34833	4.69863e-05	Not assessed	Not assessed
7241	0.00268448	0.649192	0.00111501	0.269566	0.0774424	14:50921416:C:T	ENSG00000100504_PYGL.11441.11.3_sun_pQTL	ENSG00000100504_PYGL.11441.11.3_COVID_B2_h	rs144359893	-0.206008	0.161454	-0.522452	0.110436	0.201971	Not assessed	Not assessed
4904	1.86163e-38	0.616299	9.25606e-39	0.306349	0.0773519	11:73417458:C:T	ENSG00000054967_RELT.5115.31.3_sun_pQTL	ENSG00000054967_RELT.5115.31.3_COVID_A1_h	rs7952686	0.650521	0.4264	-0.185207	1.48625	0.127106	Not assessed	Not assessed
6449	0.00111479	0.591459	0.00062111	0.329455	0.0773502	12:101651861:T:C	ENSG00000196091_MYBPC1.7648.9.3_sun_pQTL	ENSG00000196091_MYBPC1.7648.9.3_COVID_B1_h	rs59931471	0.494876	0.267248	-0.0289203	1.01867	0.0640619	Not assessed	Not assessed
9087	6.03606e-48	0.594735	3.32924e-48	0.327954	0.0773112	8:6880706:T:A	ENSG00000164825_DEFB1.6629.3.3_sun_pQTL	ENSG00000164825_DEFB1.6629.3.3_COVID_D1_h	rs2738176	-0.156912	0.0705292	-0.295147	-0.0186778	0.0260955	Not assessed	Not assessed
10106	4.92359e-38	0.516446	3.87386e-38	0.406259	0.077295	4:6598285:A:G	ENSG00000013288_MAN2B2.9251.28.3_sun_pQTL	ENSG00000013288_MAN2B2.9251.28.3_COVID_B1_h	rs2301790	0.240371	0.116158	0.0127056	0.468037	0.0385137	Not assessed	Not assessed
7819	0.24697	0.208499	0.253416	0.213863	0.0772524	7:22093420:TA:T	ENSG00000136244_IL6.4673.13.2_sun_pQTL	ENSG00000136244_IL6.4673.13.2_COVID_A2_h	rs11343049	2.64873	0.602582	1.46769	3.82977	1.10447e-05	Not assessed	Not assessed
7996	1.68226e-170	0.638105	7.51015e-171	0.284793	0.0771022	6:3003736:A:G	ENSG00000124588_NQO2.9754.33.3_sun_pQTL	ENSG00000124588_NQO2.9754.33.3_COVID_D1_h	rs4149358	0.0977918	0.0484342	0.00286254	0.192721	0.0434804	Not assessed	Not assessed
7675	4.48403e-80	0.582164	2.6254e-80	0.34078	0.0770567	6:41278099:A:AT	ENSG00000124731_TREM1.9266.1.3_sun_pQTL	ENSG00000124731_TREM1.9266.1.3_COVID_C1_h	rs151289065	-0.108482	0.0491956	-0.204903	-0.0120603	0.0274462	Not assessed	Not assessed
5471	1.4619e-05	0.727061	3.94184e-06	0.195966	0.0769543	7:87392708:G:C	ENSG00000005469_CROT.13929.27.3_sun_pQTL	ENSG00000005469_CROT.13929.27.3_COVID_D1_h	rs31644	-0.274487	0.167324	-0.602437	0.0534628	0.100912	Not assessed	Not assessed
6072	5.29314e-74	0.656141	2.15453e-74	0.267	0.0768595	14:74017569:ACT:A	ENSG00000187097_ENTPD5.4437.56.3_sun_pQTL	ENSG00000187097_ENTPD5.4437.56.3_COVID_B1_h	rs375780216	-0.205763	0.103804	-0.409216	-0.00231078	0.0474541	Not assessed	Not assessed
8743	3.17018e-08	0.509698	2.57205e-08	0.413454	0.0768479	5:116444277:C:T	ENSG00000092421_SEMA6A.7945.10.3_sun_pQTL	ENSG00000092421_SEMA6A.7945.10.3_COVID_A1_h	rs3733724	-2.01515	0.989615	-3.95476	-0.0755396	0.0417206	Not assessed	Not assessed
6109	3.29351e-60	0.673402	1.22272e-60	0.249924	0.0766739	3:53858803:T:C	ENSG00000056736_IL17RB.5084.154.3_sun_pQTL	ENSG00000056736_IL17RB.5084.154.3_COVID_A2_h	rs2232346	-0.113666	0.0714436	-0.253692	0.0263612	0.111613	Not assessed	Not assessed
4971	0.155794	0.058381	0.515945	0.193264	0.0766155	11:14623692:T:A	ENSG00000129084_PSMA1.7880.9.3_sun_pQTL	ENSG00000129084_PSMA1.7880.9.3_COVID_A1_h	rs1522633	-12.9791	2.52552	-17.9291	-8.0292	2.75927e-07	Not assessed	Not assessed
6464	3.89311e-58	0.555169	2.58294e-58	0.36826	0.076571	8:63007708:TG:T	ENSG00000137563_GGH.9370.69.3_sun_pQTL	ENSG00000137563_GGH.9370.69.3_COVID_A2_h	rs77477012	-0.19631	0.090748	-0.374173	-0.0184474	0.0305223	Not assessed	Not assessed
6483	4.55856e-58	0.649006	1.92818e-58	0.27444	0.0765535	8:63011205:T:C	ENSG00000137563_GGH.9370.69.3_sun_pQTL	ENSG00000137563_GGH.9370.69.3_COVID_B2_h	rs10957266	-0.0897595	0.0491183	-0.18603	0.00651064	0.0676376	Not assessed	Not assessed
6926	5.58312e-05	0.650996	2.33794e-05	0.272529	0.0763956	11:130104033:A:G	ENSG00000084234_APLP2.10627.87.3_sun_pQTL	ENSG00000084234_APLP2.10627.87.3_COVID_D1_h	rs6590438	0.351601	0.186414	-0.0137626	0.716965	0.0592767	Not assessed	Not assessed
6628	0.000382047	0.547094	0.000262558	0.375909	0.0763525	2:127124606:T:C	ENSG00000136717_BIN1.9574.11.3_sun_pQTL	ENSG00000136717_BIN1.9574.11.3_COVID_A1_h	rs35103166	1.55927	0.98362	-0.368587	3.48713	0.112912	Not assessed	Not assessed
6022	7.60142e-47	0.669916	2.88024e-47	0.25376	0.0763236	11:120227620:C:T	ENSG00000184232_OAF.6414.8.3_sun_pQTL	ENSG00000184232_OAF.6414.8.3_COVID_B2_h	rs117554512	-0.116747	0.0565009	-0.227487	-0.00600767	0.0388008	Not assessed	Not assessed
8115	0.247861	0.112872	0.386865	0.176096	0.0763052	9:133257521:T:TC	ENSG00000148290_SURF1.8009.121.3_sun_pQTL	ENSG00000148290_SURF1.8009.121.3_COVID_C1_h	rs8176719	1.4661	0.302864	0.872493	2.0597	1.29335e-06	Not assessed	Not assessed
7804	0.0316258	0.602034	0.0144805	0.275576	0.0762843	3:195572021:T:C	ENSG00000189058_APOD.8262.20.3_sun_pQTL	ENSG00000189058_APOD.8262.20.3_COVID_B2_h	rs139828053	-0.382972	0.21315	-0.800738	0.0347931	0.0723784	Not assessed	Not assessed
5000	0.00125295	0.625754	0.000593204	0.296183	0.0762164	4:73681043:T:C	ENSG00000169429_CXCL8.3447.64.2_sun_pQTL	ENSG00000169429_CXCL8.3447.64.2_COVID_A1_h	rs74327761	1.93988	1.12147	-0.258163	4.13792	0.0836725	Not assessed	Not assessed
9536	2.60743e-08	0.50858	2.1293e-08	0.415244	0.0761759	21:42366929:G:A	ENSG00000160182_TFF1.9185.15.3_sun_pQTL	ENSG00000160182_TFF1.9185.15.3_COVID_D1_h	rs3761376	-0.312468	0.145544	-0.59773	-0.0272063	0.0318019	Not assessed	Not assessed
8160	3.82699e-08	0.620919	1.86808e-08	0.303015	0.0760657	7:45914866:G:A	ENSG00000146674_IGFBP3.2571.12.3_sun_pQTL	ENSG00000146674_IGFBP3.2571.12.3_COVID_B2_h	rs145188037	-0.161303	0.102788	-0.362764	0.0401582	0.116584	Not assessed	Not assessed
10061	2.28555e-83	0.685851	7.94062e-84	0.238208	0.0759411	10:5974929:A:G	ENSG00000134470_IL15RA.14054.17.3_sun_pQTL	ENSG00000134470_IL15RA.14054.17.3_COVID_C1_h	rs8177641	0.0731605	0.0327401	0.008991	0.13733	0.0254449	Not assessed	Not assessed
6727	0.0551257	0.50649	0.0355879	0.326902	0.0758945	2:71150423:C:T	ENSG00000124370_MCEE.9388.18.3_sun_pQTL	ENSG00000124370_MCEE.9388.18.3_COVID_A1_h	rs11898475	-2.20273	1.22347	-4.6007	0.195229	0.0717984	Not assessed	Not assessed
7788	1.83495e-38	0.417363	2.2286e-38	0.506823	0.0758147	1:159035061:C:T	ENSG00000163565_IFI16.12893.159.3_sun_pQTL	ENSG00000163565_IFI16.12893.159.3_COVID_B1_h	rs72709516	-0.185889	0.126626	-0.434071	0.0622936	0.1421	Not assessed	Not assessed
4549	1.04244e-108	0.632267	4.81529e-109	0.291984	0.0757487	1:45585381:G:A	ENSG00000117448_AKR1A1.4192.10.2_sun_pQTL	ENSG00000117448_AKR1A1.4192.10.2_COVID_A1_h	rs72688441	0.371153	0.243737	-0.106564	0.848869	0.12782	Not assessed	Not assessed
6754	7.8922e-50	0.508764	6.4486e-50	0.415628	0.0756084	1:236236142:G:T	ENSG00000086619_ERO1LB.7994.41.3_sun_pQTL	ENSG00000086619_ERO1LB.7994.41.3_COVID_A1_h	rs1254194	-0.605861	0.383333	-1.35718	0.145459	0.113991	Not assessed	Not assessed
6918	0	0.553466	0	0.371034	0.0754996	20:1915243:G:C	ENSG00000198053_SIRPA.5430.66.3_sun_pQTL	ENSG00000198053_SIRPA.5430.66.3_COVID_A1_h	rs1057114	-0.243718	0.151591	-0.540831	0.053395	0.107894	Not assessed	Not assessed
5608	1.47569e-152	0.600816	7.95755e-153	0.323911	0.0752727	19:43191870:T:A	ENSG00000243137_PSG4.5649.83.3_sun_pQTL	ENSG00000243137_PSG4.5649.83.3_COVID_A1_h	rs1138888	-0.431096	0.285706	-0.991069	0.128877	0.131329	Not assessed	Not assessed
7520	5.2176e-62	0.689446	1.78144e-62	0.235321	0.0752332	6:73794007:G:A	ENSG00000156535_CD109.3290.50.2_sun_pQTL	ENSG00000156535_CD109.3290.50.2_COVID_B2_h	rs6903575	0.108681	0.0496671	0.0113348	0.206026	0.0286565	Not assessed	Not assessed
5808	1.76415e-05	0.711183	5.30033e-06	0.213597	0.0751976	16:66418713:A:G	ENSG00000179776_CDH5.2819.23.2_sun_pQTL	ENSG00000179776_CDH5.2819.23.2_COVID_B2_h	rs11647799	-0.396928	0.140178	-0.671673	-0.122183	0.00463171	Not assessed	Not assessed
4347	0	0.622241	0	0.302808	0.0749502	1:154453788:C:T	ENSG00000160712_IL6R.8092.29.3_sun_pQTL	ENSG00000160712_IL6R.8092.29.3_COVID_A2_h	rs4129267	-0.0540089	0.0258079	-0.104591	-0.00342642	0.0363732	Not assessed	Not assessed
5240	0.444876	0.191496	0.201882	0.0868249	0.0749209	8:8406990:A:G	ENSG00000186562_DEFB105A.10962.46.3_sun_pQTL	ENSG00000186562_DEFB105A.10962.46.3_COVID_A2_h	rs2976925	-1.41182	0.459818	-2.31305	-0.510591	0.00213784	Not assessed	Not assessed
5480	2.39688e-05	0.732444	6.30877e-06	0.19271	0.074815	15:40853721:C:T	ENSG00000166145_SPINT1.2828.82.2_sun_pQTL	ENSG00000166145_SPINT1.2828.82.2_COVID_B2_h	rs17658212	-0.295528	0.147536	-0.584692	-0.00636275	0.0451675	Not assessed	Not assessed
4538	7.6768e-47	0.652199	3.21601e-47	0.273149	0.0746524	20:32227952:C:T	ENSG00000101346_POFUT1.5634.39.3_sun_pQTL	ENSG00000101346_POFUT1.5634.39.3_COVID_A1_h	rs76143353	0.719213	0.469037	-0.200084	1.63851	0.125182	Not assessed	Not assessed
5843	0	0.667553	0	0.257959	0.0744876	1:203215638:T:C	ENSG00000133063_CHIT1.3600.2.3_sun_pQTL	ENSG00000133063_CHIT1.3600.2.3_COVID_A2_h	rs872583	-0.076792	0.0417319	-0.158585	0.00500105	0.0657497	Not assessed	Not assessed
8059	4.34868e-27	0.50802	3.57476e-27	0.417535	0.0744445	9:133210436:G:A	ENSG00000171102_OBP2B.5680.54.3_sun_pQTL	ENSG00000171102_OBP2B.5680.54.3_COVID_B1_h	rs3761822	-0.291218	0.142952	-0.571398	-0.0110375	0.0416325	Not assessed	Not assessed
6873	0.203044	0.404045	0.106564	0.211981	0.0743667	12:117061239:G:A	ENSG00000088992_TESC.12831.21.3_sun_pQTL	ENSG00000088992_TESC.12831.21.3_COVID_A2_h	rs10850752	-0.81319	0.351907	-1.50291	-0.123466	0.0208432	Not assessed	Not assessed
6335	3.02288e-07	0.573883	1.85388e-07	0.351879	0.0742377	5:38907320:C:T	ENSG00000145623_OSMR.10892.8.3_sun_pQTL	ENSG00000145623_OSMR.10892.8.3_COVID_A1_h	rs357253	-1.42633	0.846625	-3.08568	0.233026	0.0920421	Not assessed	Not assessed
4347	0	0.6222	0	0.303734	0.0740658	1:154452980:G:A	ENSG00000160712_IL6R.4139.71.2_sun_pQTL	ENSG00000160712_IL6R.4139.71.2_COVID_A2_h	rs12126142	-0.0556025	0.0256178	-0.105812	-0.00539253	0.0299718	Not assessed	Not assessed
7811	4.9873e-24	0.543175	3.51569e-24	0.382826	0.0739997	4:76022794:G:A	ENSG00000169245_CXCL10.4141.79.1_sun_pQTL	ENSG00000169245_CXCL10.4141.79.1_COVID_B1_h	rs11548618	0.266495	0.150765	-0.0289983	0.561988	0.0771241	Not assessed	Not assessed
7089	5.48491e-15	0.588141	3.15166e-15	0.337876	0.0739833	19:49013883:C:T	ENSG00000104826_LHB.8376.25.4_sun_pQTL	ENSG00000104826_LHB.8376.25.4_COVID_A2_h	rs75287599	0.24438	0.12102	0.0071851	0.481576	0.0434524	Not assessed	Not assessed
7138	0.32519	0.135733	0.3282	0.136915	0.0739624	4:68323330:A:G	ENSG00000187054_TMPRSS11A.7231.37.3_sun_pQTL	ENSG00000187054_TMPRSS11A.7231.37.3_COVID_C1_h	rs1730872	-1.1398	0.272264	-1.67343	-0.606171	2.8345e-05	Not assessed	Not assessed
6971	0	0.616606	0	0.309472	0.0739215	1:161509955:A:G	ENSG00000143226_FCGR2A.3309.2.2_sun_pQTL	ENSG00000143226_FCGR2A.3309.2.2_COVID_A2_h	rs1801274	0.0580483	0.029259	0.000701643	0.115395	0.047262	Not assessed	Not assessed
2324	0.00333749	0.755334	0.000736862	0.166691	0.0739007	2:88825975:A:G	ENSG00000153574_RPIA.12333.87.3_sun_pQTL	ENSG00000153574_RPIA.12333.87.3_COVID_A1_h	rs1809526	1.2062	0.983509	-0.721442	3.13384	0.220039	Not assessed	Not assessed
7251	0.337324	0.294626	0.157095	0.137137	0.0738183	18:74503064:C:T	ENSG00000133313_CNDP2.3192.3.2_sun_pQTL	ENSG00000133313_CNDP2.3192.3.2_COVID_A2_h	rs4891557	0.968805	0.312065	0.357169	1.58044	0.00190603	Not assessed	Not assessed
6381	1.56997e-08	0.5821	9.28725e-09	0.344272	0.0736273	18:62387624:A:C	ENSG00000141655_TNFRSF11A.8256.57.3_sun_pQTL	ENSG00000141655_TNFRSF11A.8256.57.3_COVID_A1_h	rs884205	-1.21217	0.788501	-2.7576	0.333264	0.124218	Not assessed	Not assessed
8194	1.61152e-23	0.652428	6.78468e-24	0.274606	0.0729658	3:98790861:G:A	ENSG00000057019_DCBLD2.9338.2.3_sun_pQTL	ENSG00000057019_DCBLD2.9338.2.3_COVID_A2_h	rs72934623	-0.211205	0.100214	-0.407621	-0.0147895	0.0350705	Not assessed	Not assessed
9015	0	0.543319	0	0.383924	0.072757	16:1230086:G:C	ENSG00000197253_TPSB2.3403.1.2_sun_pQTL	ENSG00000197253_TPSB2.3403.1.2_COVID_B1_h	rs143547788	0.0906208	0.0475852	-0.00264448	0.183886	0.0568593	Not assessed	Not assessed
5486	0.370924	0.145709	0.294924	0.115781	0.0726623	15:77915632:T:C	ENSG00000117906_RCN2.10645.72.3_sun_pQTL	ENSG00000117906_RCN2.10645.72.3_COVID_A2_h	rs71400903	-1.96547	0.550666	-3.04476	-0.886189	0.000357978	Not assessed	Not assessed
6649	3.61041e-16	0.577694	2.18656e-16	0.349795	0.072511	6:160671406:C:T	ENSG00000122194_PLG.3710.49.2_sun_pQTL	ENSG00000122194_PLG.3710.49.2_COVID_A1_h	rs11751347	1.06136	0.6625	-0.237117	2.35984	0.109144	Not assessed	Not assessed
2750	1.18923e-17	0.792475	2.02788e-18	0.135061	0.0724648	10:46241058:A:G	ENSG00000263639_MSMB.10620.21.3_sun_pQTL	ENSG00000263639_MSMB.10620.21.3_COVID_D1_h	rs75735517	-0.467849	0.417849	-1.28682	0.35112	0.262858	Not assessed	Not assessed
6727	1.16797e-10	0.693477	3.94515e-11	0.23417	0.0723537	3:119462321:CA:C	ENSG00000163389_POGLUT1.6467.65.3_sun_pQTL	ENSG00000163389_POGLUT1.6467.65.3_COVID_D1_h	rs147687258	-0.410562	0.191463	-0.785824	-0.035301	0.0320058	Not assessed	Not assessed
6682	0	0.632991	0	0.295058	0.0719513	10:88766035:C:T	ENSG00000204020_LIPN.8097.77.3_sun_pQTL	ENSG00000204020_LIPN.8097.77.3_COVID_B1_h	rs10509554	0.0808254	0.0432336	-0.00391101	0.165562	0.061553	Not assessed	Not assessed
6754	0.256305	0.466719	0.0727254	0.132357	0.0718935	22:37475678:C:G	ENSG00000100060_MFNG.5605.77.3_sun_pQTL	ENSG00000100060_MFNG.5605.77.3_COVID_C1_h	rs116906616	0.391822	0.171237	0.0562036	0.72744	0.0221267	Not assessed	Not assessed
3947	0	0.676811	0	0.251413	0.0717762	1:154452980:G:A	ENSG00000160712_IL6R.4139.71.2_sun_pQTL	ENSG00000160712_IL6R.4139.71.2_COVID_A1_h	rs12126142	-0.178026	0.133249	-0.43919	0.0831379	0.181537	Not assessed	Not assessed
6845	1.8354e-19	0.546617	1.28169e-19	0.38164	0.0717425	7:23273552:T:C	ENSG00000136235_GPNMB.8606.39.3_sun_pQTL	ENSG00000136235_GPNMB.8606.39.3_COVID_A1_h	rs2268748	0.84569	0.475422	-0.0861203	1.7775	0.0752694	Not assessed	Not assessed
7693	4.76349e-05	0.536218	3.48357e-05	0.392068	0.071632	19:56177412:G:C	ENSG00000197487_GALP.9398.30.3_sun_pQTL	ENSG00000197487_GALP.9398.30.3_COVID_A1_h	rs111265125	3.43367	1.12922	1.22044	5.64691	0.00235993	Not assessed	Not assessed
5752	0	0.610036	0	0.318614	0.0713503	5:150128981:C:G	ENSG00000113721_PDGFRB.3459.49.2_sun_pQTL	ENSG00000113721_PDGFRB.3459.49.2_COVID_A1_h	rs2304058	-0.25405	0.177654	-0.602245	0.0941444	0.152708	Not assessed	Not assessed
8091	3.8627e-08	0.626066	1.86733e-08	0.302585	0.0713481	7:45914866:G:A	ENSG00000146674_IGFBP3.2571.12.3_sun_pQTL	ENSG00000146674_IGFBP3.2571.12.3_COVID_A2_h	rs145188037	-0.17812	0.122287	-0.417798	0.0615578	0.145234	Not assessed	Not assessed
5265	3.94688e-05	0.667	1.54918e-05	0.261731	0.0712139	9:97140242:T:A	ENSG00000136943_CTSV.3364.76.2_sun_pQTL	ENSG00000136943_CTSV.3364.76.2_COVID_B1_h	rs10817163	-0.419581	0.231331	-0.872982	0.0338196	0.0697134	Not assessed	Not assessed
6477	0	0.544357	0	0.384639	0.0710038	12:9984958:A:C	ENSG00000172322_CLEC12A.11187.11.3_sun_pQTL	ENSG00000172322_CLEC12A.11187.11.3_COVID_A1_h	rs479499	0.205827	0.132359	-0.0535927	0.465247	0.119932	Not assessed	Not assessed
6501	3.33482e-63	0.570518	2.09636e-63	0.358573	0.0709088	17:34321859:CA:C	ENSG00000108688_CCL7.4886.3.1_sun_pQTL	ENSG00000108688_CCL7.4886.3.1_COVID_A1_h	rs11342894	-0.82489	0.463285	-1.73291	0.0831316	0.0749902	Not assessed	Not assessed
6669	0.000545478	0.696298	0.000181872	0.232087	0.0708875	4:87529963:A:ATG	ENSG00000152583_SPARCL1.13707.27.3_sun_pQTL	ENSG00000152583_SPARCL1.13707.27.3_COVID_B2_h	rs5860081	1.05284	0.270812	0.52206	1.58362	0.000101189	Not assessed	Not assessed
5836	0.107214	0.458193	0.0689934	0.294781	0.0708182	5:44387435:A:C	ENSG00000151882_CCL28.2890.59.2_sun_pQTL	ENSG00000151882_CCL28.2890.59.2_COVID_A1_h	rs2973646	-2.74402	1.39127	-5.47086	-0.0171683	0.0485749	Not assessed	Not assessed
5581	0.451613	0.206901	0.185697	0.0850038	0.0707858	5:137439775:C:T	ENSG00000152377_SPOCK1.5490.53.3_sun_pQTL	ENSG00000152377_SPOCK1.5490.53.3_COVID_A2_h	rs7720059	-1.41758	0.389905	-2.18178	-0.653386	0.000277203	Not assessed	Not assessed
7343	7.5238e-16	0.647063	3.28202e-16	0.28219	0.070747	3:126987957:C:G	ENSG00000114554_PLXNA1.9005.16.3_sun_pQTL	ENSG00000114554_PLXNA1.9005.16.3_COVID_C1_h	rs7649075	-0.178595	0.068276	-0.312414	-0.0447766	0.00890235	Not assessed	Not assessed
10183	6.00903e-18	0.46482	6.00574e-18	0.464495	0.0706846	3:3056357:G:C	ENSG00000144619_CNTN4.3298.52.2_sun_pQTL	ENSG00000144619_CNTN4.3298.52.2_COVID_A1_h	rs163352	1.03961	0.597014	-0.130515	2.20974	0.0816219	Not assessed	Not assessed
6964	4.63515e-28	0.536773	3.39105e-28	0.39263	0.0705973	17:80650902:T:C	ENSG00000171246_NPTX1.9256.78.3_sun_pQTL	ENSG00000171246_NPTX1.9256.78.3_COVID_A1_h	rs62069681	0.869903	0.538288	-0.185122	1.92493	0.106082	Not assessed	Not assessed
3947	0	0.677729	0	0.251738	0.0705327	1:154453788:C:T	ENSG00000160712_IL6R.8092.29.3_sun_pQTL	ENSG00000160712_IL6R.8092.29.3_COVID_A1_h	rs4129267	-0.176649	0.134247	-0.439767	0.0864696	0.188223	Not assessed	Not assessed
4838	1.58347e-115	0.631215	7.48571e-116	0.298331	0.0704543	1:9245386:A:C	ENSG00000049239_H6PD.7161.25.3_sun_pQTL	ENSG00000049239_H6PD.7161.25.3_COVID_A1_h	rs34603401	0.362709	0.269574	-0.165647	0.891065	0.178468	Not assessed	Not assessed
3234	5.44932e-22	0.699434	1.79378e-22	0.230166	0.0703997	7:142856383:A:G	ENSG00000106123_EPHB6.5078.82.3_sun_pQTL	ENSG00000106123_EPHB6.5078.82.3_COVID_A1_h	rs8177107	-0.642435	0.533276	-1.68764	0.402768	0.228322	Not assessed	Not assessed
6334	0.141098	0.562144	0.0454406	0.180968	0.0703495	11:72210765:T:C	ENSG00000184276_DEFB108B.5611.56.3_sun_pQTL	ENSG00000184276_DEFB108B.5611.56.3_COVID_B2_h	rs150315055	0.470919	0.199284	0.0803299	0.861508	0.0181249	Not assessed	Not assessed
5410	1.83423e-167	0.661866	7.42911e-168	0.268004	0.0701299	4:73877758:T:C	ENSG00000163739_CXCL1.2985.35.1_sun_pQTL	ENSG00000163739_CXCL1.2985.35.1_COVID_B1_h	rs3097409	-0.109625	0.060234	-0.227681	0.00843178	0.068762	Not assessed	Not assessed
7590	5.60631e-13	0.516797	4.48198e-13	0.413085	0.0701185	19:7668790:A:C	ENSG00000104918_RETN.3046.31.1_sun_pQTL	ENSG00000104918_RETN.3046.31.1_COVID_A1_h	rs34124816	-3.09436	1.07878	-5.20873	-0.979997	0.00412556	Not assessed	Not assessed
3828	2.07243e-10	0.676408	7.77187e-11	0.253591	0.0700008	12:56330549:C:T	ENSG00000175336_APOF.12370.30.3_sun_pQTL	ENSG00000175336_APOF.12370.30.3_COVID_A1_h	rs192026667	-2.47903	1.18891	-4.80924	-0.148814	0.0370573	Not assessed	Not assessed
7610	0.0446089	0.583067	0.0214923	0.280847	0.0699844	5:151735729:T:A	ENSG00000113140_SPARC.3043.49.2_sun_pQTL	ENSG00000113140_SPARC.3043.49.2_COVID_D1_h	rs2915818	-0.643582	0.236491	-1.1071	-0.180068	0.00650102	Not assessed	Not assessed
7481	1.0812e-31	0.706652	3.42013e-32	0.223463	0.0698849	12:42104255:A:T	ENSG00000151233_GXYLT1.8229.1.3_sun_pQTL	ENSG00000151233_GXYLT1.8229.1.3_COVID_B2_h	rs34619182	-0.245032	0.0875984	-0.416722	-0.0733422	0.00515446	Not assessed	Not assessed
4042	0.390907	0.207314	0.216976	0.115002	0.0698013	12:112392251:G:T	ENSG00000179295_PTPN11.3397.7.4_sun_pQTL	ENSG00000179295_PTPN11.3397.7.4_COVID_C1_h	rs76296879	-1.07754	0.29307	-1.65195	-0.503137	0.00023623	Not assessed	Not assessed
5871	0.000798014	0.564092	0.000516485	0.365018	0.0695751	1:204179521:G:A	ENSG00000143839_REN.3396.54.2_sun_pQTL	ENSG00000143839_REN.3396.54.2_COVID_A1_h	rs193280350	-1.2554	0.526825	-2.28796	-0.222844	0.0171742	Not assessed	Not assessed
7670	3.71104e-80	0.481825	3.45579e-80	0.448615	0.0695597	6:41278099:A:AT	ENSG00000124731_TREM1.9266.1.3_sun_pQTL	ENSG00000124731_TREM1.9266.1.3_COVID_C2_h	rs151289065	-0.106879	0.0471933	-0.199376	-0.0143817	0.0235308	Not assessed	Not assessed
6811	2.90729e-11	0.557167	1.94826e-11	0.373304	0.0695285	14:20812519:G:A	ENSG00000129538_RNASE1.7211.2.3_sun_pQTL	ENSG00000129538_RNASE1.7211.2.3_COVID_A1_h	rs17254387	1.07728	0.717029	-0.32807	2.48263	0.132988	Not assessed	Not assessed
2646	1.13373e-17	0.755967	2.6184e-18	0.174524	0.0695087	10:46241058:A:G	ENSG00000263639_MSMB.10620.21.3_sun_pQTL	ENSG00000263639_MSMB.10620.21.3_COVID_A1_h	rs75735517	-0.591956	0.93684	-2.42813	1.24422	0.527475	Not assessed	Not assessed
6523	6.82585e-08	0.540069	4.93541e-08	0.390425	0.0695056	8:119410559:T:C	ENSG00000136999_NOV.2737.22.2_sun_pQTL	ENSG00000136999_NOV.2737.22.2_COVID_A1_h	rs58936256	1.44158	0.897746	-0.317967	3.20113	0.108322	Not assessed	Not assessed
5835	8.09545e-12	0.676558	3.04084e-12	0.254062	0.0693802	1:16975285:A:G	ENSG00000117122_MFAP2.9294.45.3_sun_pQTL	ENSG00000117122_MFAP2.9294.45.3_COVID_D1_h	rs761422	0.271233	0.129723	0.01698	0.525486	0.0365408	Not assessed	Not assessed
7226	6.99799e-05	0.577916	4.27301e-05	0.352809	0.0691619	10:119670121:T:C	ENSG00000151929_BAG3.10078.5.3_sun_pQTL	ENSG00000151929_BAG3.10078.5.3_COVID_B2_h	rs2234962	-0.325464	0.143225	-0.606181	-0.0447471	0.0230631	Not assessed	Not assessed
6569	0.0240149	0.629784	0.0101819	0.266949	0.0690698	12:6333477:C:T	ENSG00000067182_TNFRSF1A.2654.19.1_sun_pQTL	ENSG00000067182_TNFRSF1A.2654.19.1_COVID_B1_h	rs4149584	-0.410615	0.299178	-0.996992	0.175763	0.169915	Not assessed	Not assessed
7617	3.85878e-11	0.739546	1.00029e-11	0.19164	0.0688147	14:20812519:G:A	ENSG00000129538_RNASE1.7211.2.3_sun_pQTL	ENSG00000129538_RNASE1.7211.2.3_COVID_C2_h	rs17254387	0.160022	0.0721981	0.0185161	0.301527	0.0266623	Not assessed	Not assessed
5576	2.98248e-18	0.416984	3.67937e-18	0.514348	0.0686685	1:43307362:A:G	ENSG00000066056_TIE1.2844.53.2_sun_pQTL	ENSG00000066056_TIE1.2844.53.2_COVID_A2_h	rs2275180	0.265898	0.113467	0.0435065	0.48829	0.0191093	Not assessed	Not assessed
6379	0	0.686984	0	0.244356	0.0686603	5:150128981:C:G	ENSG00000113721_PDGFRB.3459.49.2_sun_pQTL	ENSG00000113721_PDGFRB.3459.49.2_COVID_D1_h	rs2304058	0.0584401	0.0288408	0.00191316	0.114967	0.0427341	Not assessed	Not assessed
4351	0.132183	0.518478	0.0570386	0.223661	0.0686393	17:44606415:C:T	ENSG00000161653_NAGS.11247.20.3_sun_pQTL	ENSG00000161653_NAGS.11247.20.3_COVID_A1_h	rs76404643	-1.08945	1.41757	-3.86783	1.68893	0.442168	Not assessed	Not assessed
8773	1.81994e-18	0.616616	9.29252e-19	0.314772	0.0686117	5:179802151:A:G	ENSG00000161013_MGAT4B.7141.21.3_sun_pQTL	ENSG00000161013_MGAT4B.7141.21.3_COVID_D1_h	rs58413676	-0.169545	0.113101	-0.391219	0.0521293	0.133859	Not assessed	Not assessed
5688	0.0011264	0.650748	0.000483278	0.279133	0.0685088	8:98033638:G:A	ENSG00000132561_MATN2.3325.2.2_sun_pQTL	ENSG00000132561_MATN2.3325.2.2_COVID_B1_h	rs17831160	-0.414444	0.303746	-1.00978	0.180888	0.172429	Not assessed	Not assessed
2255	3.27139e-18	0.772815	6.72042e-19	0.158691	0.0684942	2:96739703:G:A	ENSG00000114988_LMAN2L.8013.9.3_sun_pQTL	ENSG00000114988_LMAN2L.8013.9.3_COVID_A1_h	rs2271893	-0.632002	0.638546	-1.88353	0.619526	0.322296	Not assessed	Not assessed
3605	1.40195e-08	0.707433	4.44285e-09	0.22412	0.0684469	11:65986362:C:T	ENSG00000175315_CST6.3303.23.2_sun_pQTL	ENSG00000175315_CST6.3303.23.2_COVID_A1_h	rs148479829	-0.273172	1.55604	-3.32296	2.77662	0.860643	Not assessed	Not assessed
3606	9.87313e-08	0.707406	3.12944e-08	0.224154	0.0684398	11:66000622:A:G	ENSG00000175315_CST6.14711.27.3_sun_pQTL	ENSG00000175315_CST6.14711.27.3_COVID_A1_h	rs3825068	0.614623	1.08208	-1.50621	2.73545	0.570033	Not assessed	Not assessed
6618	2.70129e-10	0.635029	1.26168e-10	0.296531	0.0684397	1:160789262:A:G	ENSG00000122224_LY9.3324.51.1_sun_pQTL	ENSG00000122224_LY9.3324.51.1_COVID_B1_h	rs12405457	-0.537069	0.250245	-1.02754	-0.0465983	0.031859	Not assessed	Not assessed
6069	0.083215	0.462489	0.0588561	0.32704	0.0683993	1:66857057:G:A	ENSG00000172410_INSL5.10462.14.3_sun_pQTL	ENSG00000172410_INSL5.10462.14.3_COVID_A1_h	rs569101	-1.21166	1.18224	-3.5288	1.10548	0.305417	Not assessed	Not assessed
6236	2.01606e-06	0.574409	1.25401e-06	0.357222	0.0683659	21:32496173:T:G	ENSG00000166979_EVA1C.8877.22.3_sun_pQTL	ENSG00000166979_EVA1C.8877.22.3_COVID_A1_h	rs6517101	0.906808	0.885324	-0.828394	2.64201	0.305709	Not assessed	Not assessed
3440	1.83224e-111	0.703826	5.93307e-112	0.227841	0.0683331	20:34077942:A:G	ENSG00000101440_ASIP.5676.54.3_sun_pQTL	ENSG00000101440_ASIP.5676.54.3_COVID_A1_h	rs6059655	0.351677	0.365545	-0.364777	1.06813	0.336018	Not assessed	Not assessed
5818	3.61176e-13	0.183468	1.47307e-12	0.748212	0.0683202	7:66087510:A:G	ENSG00000169902_TPST1.7928.183.3_sun_pQTL	ENSG00000169902_TPST1.7928.183.3_COVID_A2_h	rs313829	0.372914	0.174747	0.030416	0.715412	0.0328411	Not assessed	Not assessed
7068	3.81308e-46	0.662283	1.55146e-46	0.2694	0.0683172	14:20678425:C:T	ENSG00000258818_RNASE4.5644.60.3_sun_pQTL	ENSG00000258818_RNASE4.5644.60.3_COVID_B2_h	rs12588573	-0.126213	0.0624143	-0.248543	-0.00388289	0.0431582	Not assessed	Not assessed
5133	4.88e-51	0.625653	2.38792e-51	0.306082	0.0682651	11:108486410:G:A	ENSG00000178202_KDELC2.8296.117.3_sun_pQTL	ENSG00000178202_KDELC2.8296.117.3_COVID_A1_h	rs74911261	-0.79933	0.46996	-1.72044	0.121775	0.088972	Not assessed	Not assessed
5260	0.134871	0.0710883	0.475315	0.250463	0.0682629	8:8872978:G:A	ENSG00000176797_DEFB103A.5679.16.3_sun_pQTL	ENSG00000176797_DEFB103A.5679.16.3_COVID_B1_h	rs332040	-3.54663	0.751111	-5.01878	-2.07448	2.33715e-06	Not assessed	Not assessed
8936	1.13305e-12	0.545875	8.01249e-13	0.385953	0.0681723	19:51627384:T:A	ENSG00000254415_SIGLEC14.5125.6.3_sun_pQTL	ENSG00000254415_SIGLEC14.5125.6.3_COVID_B2_h	rs1106476	0.209988	0.104536	0.00510035	0.414875	0.0445632	Not assessed	Not assessed
5402	0.306398	0.10893	0.381123	0.135429	0.0681203	19:977763:A:G	ENSG00000129946_SHC2.14074.2.3_sun_pQTL	ENSG00000129946_SHC2.14074.2.3_COVID_A2_h	rs8111981	-3.10769	0.682506	-4.44538	-1.77	5.27973e-06	Not assessed	Not assessed
4710	6.3625e-154	0.642453	2.86783e-154	0.289511	0.0680353	19:43174936:A:G	ENSG00000221826_PSG3.6444.15.3_sun_pQTL	ENSG00000221826_PSG3.6444.15.3_COVID_A1_h	rs2355433	-0.359804	0.27958	-0.90777	0.188163	0.198114	Not assessed	Not assessed
6687	0.31074	0.313835	0.15298	0.154435	0.06801	10:110005298:G:A	ENSG00000108055_SMC3.14324.52.3_sun_pQTL	ENSG00000108055_SMC3.14324.52.3_COVID_A2_h	rs150363316	1.00922	0.406148	0.213189	1.80526	0.0129599	Not assessed	Not assessed
7376	0.00232773	0.715125	0.000696366	0.21387	0.0679817	14:50921416:C:T	ENSG00000100504_PYGL.11441.11.3_sun_pQTL	ENSG00000100504_PYGL.11441.11.3_COVID_C1_h	rs144359893	-0.156595	0.099709	-0.352021	0.0388309	0.116294	Not assessed	Not assessed
6943	1.53541e-21	0.588921	8.94714e-22	0.343108	0.0679706	9:33113324:C:T	ENSG00000086062_B4GALT1.13381.49.3_sun_pQTL	ENSG00000086062_B4GALT1.13381.49.3_COVID_A2_h	rs7019909	-0.191226	0.103004	-0.393109	0.0106573	0.0633825	Not assessed	Not assessed
7174	1.13468e-08	0.666627	4.51962e-09	0.26546	0.0679138	11:124756673:G:A	ENSG00000149564_ESAM.7841.84.3_sun_pQTL	ENSG00000149564_ESAM.7841.84.3_COVID_D1_h	rs61753651	0.246315	0.198907	-0.143537	0.636166	0.215591	Not assessed	Not assessed
3415	0.00478271	0.698502	0.00155647	0.22725	0.0679088	3:50302191:C:T	ENSG00000114378_HYAL1.8309.12.3_sun_pQTL	ENSG00000114378_HYAL1.8309.12.3_COVID_A1_h	rs116482870	1.26652	1.05395	-0.799183	3.33223	0.229483	Not assessed	Not assessed
6004	1.04496e-17	0.621477	5.2243e-18	0.31064	0.0678836	11:74709658:A:T	ENSG00000054938_CHRDL2.6086.15.3_sun_pQTL	ENSG00000054938_CHRDL2.6086.15.3_COVID_B1_h	rs76136269	-0.282348	0.165791	-0.607293	0.0425963	0.0885612	Not assessed	Not assessed
5997	6.57492e-05	0.680107	2.43642e-05	0.251955	0.0678484	1:42153468:A:G	ENSG00000044012_GUCA2B.6223.5.3_sun_pQTL	ENSG00000044012_GUCA2B.6223.5.3_COVID_B2_h	rs1047047	-0.322168	0.132129	-0.581135	-0.0632003	0.014757	Not assessed	Not assessed
6317	5.40574e-05	0.589553	3.14186e-05	0.342586	0.0677757	7:97479644:T:C	ENSG00000006128_TAC1.9337.43.3_sun_pQTL	ENSG00000006128_TAC1.9337.43.3_COVID_A1_h	rs11977936	-1.27567	0.833729	-2.90975	0.358409	0.125998	Not assessed	Not assessed
7203	0	0.543109	0	0.389162	0.0677287	9:133257521:T:TC	ENSG00000175164_ABO.9253.52.3_sun_pQTL	ENSG00000175164_ABO.9253.52.3_COVID_A1_h	rs8176719	-0.224593	0.149577	-0.517758	0.0685715	0.133219	Not assessed	Not assessed
7574	0.109198	0.507672	0.0558595	0.259629	0.0676419	1:218511504:C:G	ENSG00000092969_TGFB2.4156.74.1_sun_pQTL	ENSG00000092969_TGFB2.4156.74.1_COVID_B1_h	rs12026168	-0.619237	0.330249	-1.26651	0.0280385	0.0607841	Not assessed	Not assessed
7919	0.00134022	0.531415	0.00100571	0.398711	0.0675278	16:57469448:C:T	ENSG00000006210_CX3CL1.2827.23.2_sun_pQTL	ENSG00000006210_CX3CL1.2827.23.2_COVID_D1_h	rs170365	0.538287	0.198934	0.148384	0.92819	0.00681272	Not assessed	Not assessed
9404	2.95973e-17	0.359843	4.71051e-17	0.572634	0.0675231	10:4965670:T:C	ENSG00000187134_AKR1C1.12618.50.3_sun_pQTL	ENSG00000187134_AKR1C1.12618.50.3_COVID_D1_h	rs7893456	-0.240735	0.110784	-0.457869	-0.0236018	0.0297798	Not assessed	Not assessed
6825	2.58093e-64	0.692376	8.95775e-65	0.240239	0.0673854	4:94345053:A:G	ENSG00000163106_HPGDS.12549.33.3_sun_pQTL	ENSG00000163106_HPGDS.12549.33.3_COVID_D1_h	rs1965049	-0.125444	0.0615423	-0.246064	-0.00482287	0.0415169	Not assessed	Not assessed
6863	1.16239e-18	0.553431	7.96576e-19	0.379194	0.0673745	17:4781933:G:A	ENSG00000182327_GLTPD2.7948.129.3_sun_pQTL	ENSG00000182327_GLTPD2.7948.129.3_COVID_A1_h	rs34460487	-0.846984	0.570064	-1.96429	0.27032	0.13734	Not assessed	Not assessed
6229	0.376234	0.174901	0.260475	0.121021	0.0673692	3:183535656:T:C	ENSG00000090534_THPO.5947.90.3_sun_pQTL	ENSG00000090534_THPO.5947.90.3_COVID_A2_h	rs7639440	1.57624	0.456766	0.680999	2.47149	0.000558769	Not assessed	Not assessed
7150	1.30772e-40	0.538635	9.575e-41	0.394317	0.0670479	19:8055614:A:G	ENSG00000131142_CCL25.14068.29.3_sun_pQTL	ENSG00000131142_CCL25.14068.29.3_COVID_A1_h	rs62124688	-0.614355	0.409563	-1.41708	0.188374	0.133608	Not assessed	Not assessed
5465	3.53704e-12	0.623234	1.7585e-12	0.309784	0.0669814	2:102223859:T:G	ENSG00000115598_IL1RL2.2994.71.2_sun_pQTL	ENSG00000115598_IL1RL2.2994.71.2_COVID_A1_h	rs34722443	-0.893319	0.650412	-2.1681	0.381464	0.169607	Not assessed	Not assessed
7270	2.81504e-202	0.546497	1.99182e-202	0.386614	0.0668889	20:1562420:G:A	ENSG00000101307_SIRPB1.6247.9.3_sun_pQTL	ENSG00000101307_SIRPB1.6247.9.3_COVID_A1_h	rs3848788	0.3298	0.220274	-0.101928	0.761529	0.134334	Not assessed	Not assessed
6613	0	0.624199	0	0.308935	0.0668665	10:88766035:C:T	ENSG00000204020_LIPN.8097.77.3_sun_pQTL	ENSG00000204020_LIPN.8097.77.3_COVID_A2_h	rs10509554	0.0759223	0.0407486	-0.0039436	0.155788	0.0624362	Not assessed	Not assessed
3924	0.00488668	0.714151	0.00145551	0.212645	0.0668626	3:50302191:C:T	ENSG00000114378_HYAL1.8309.12.3_sun_pQTL	ENSG00000114378_HYAL1.8309.12.3_COVID_A2_h	rs116482870	0.497773	0.29445	-0.0793393	1.07489	0.0909294	Not assessed	Not assessed
7111	4.64155e-79	0.520151	3.68607e-79	0.413009	0.0668401	1:169696410:G:T	ENSG00000188404_SELL.4831.4.2_sun_pQTL	ENSG00000188404_SELL.4831.4.2_COVID_A1_h	rs4987358	0.469874	0.310765	-0.139214	1.07896	0.130536	Not assessed	Not assessed
6530	0.0259123	0.689191	0.0079065	0.210223	0.066767	12:6333477:C:T	ENSG00000067182_TNFRSF1A.2654.19.1_sun_pQTL	ENSG00000067182_TNFRSF1A.2654.19.1_COVID_C2_h	rs4149584	0.164937	0.0965801	-0.0243561	0.354231	0.0876774	Not assessed	Not assessed
6344	0.36895	0.185104	0.252552	0.12664	0.0667544	3:183780478:G:A	ENSG00000090534_THPO.5947.90.3_sun_pQTL	ENSG00000090534_THPO.5947.90.3_COVID_B2_h	rs75092274	1.11381	0.291725	0.54204	1.68558	0.000134529	Not assessed	Not assessed
4829	0.00676341	0.635419	0.00306679	0.288057	0.0666938	9:34661759:CA:C	ENSG00000213927_CCL27.2192.63.10_sun_pQTL	ENSG00000213927_CCL27.2192.63.10_COVID_A1_h	rs11575583	1.05283	1.10178	-1.10662	3.21228	0.339288	Not assessed	Not assessed
7078	0.383728	0.238002	0.19244	0.119292	0.0665381	12:69154473:A:G	ENSG00000135679_MDM2.4245.80.2_sun_pQTL	ENSG00000135679_MDM2.4245.80.2_COVID_A2_h	rs12318262	-1.64646	0.456673	-2.54153	-0.751402	0.000311736	Not assessed	Not assessed
7088	0.00131899	0.522607	0.00103121	0.408517	0.0665256	15:78255107:C:A	ENSG00000140403_DNAJA4.9744.139.3_sun_pQTL	ENSG00000140403_DNAJA4.9744.139.3_COVID_B2_h	rs11639191	0.388757	0.153729	0.0874534	0.690061	0.0114439	Not assessed	Not assessed
6692	2.14348e-18	0.572514	1.35206e-18	0.361061	0.066425	11:123175022:C:T	ENSG00000166250_CLMP.10440.26.3_sun_pQTL	ENSG00000166250_CLMP.10440.26.3_COVID_A1_h	rs35483681	0.90854	0.618444	-0.303588	2.12067	0.141813	Not assessed	Not assessed
6520	0.173182	0.117727	0.382642	0.260049	0.0664003	2:165473791:T:A	ENSG00000115339_GALNT3.6593.5.3_sun_pQTL	ENSG00000115339_GALNT3.6593.5.3_COVID_C2_h	rs16850739	-1.06339	0.241284	-1.5363	-0.590484	1.04703e-05	Not assessed	Not assessed
6459	1.64349e-107	0.665677	6.61676e-108	0.267938	0.0663853	22:50289363:T:C	ENSG00000196576_PLXNB2.9216.100.3_sun_pQTL	ENSG00000196576_PLXNB2.9216.100.3_COVID_D1_h	rs28573806	-0.107998	0.0538664	-0.213574	-0.00242188	0.0449711	Not assessed	Not assessed
6374	1.03792e-85	0.49083	9.36583e-86	0.442842	0.0663276	4:17518443:C:T	ENSG00000151552_QDPR.11257.1.3_sun_pQTL	ENSG00000151552_QDPR.11257.1.3_COVID_A1_h	rs28719835	0.485815	0.299771	-0.101725	1.07335	0.105099	Not assessed	Not assessed
5893	2.44006e-17	0.565508	1.58925e-17	0.368257	0.0662352	6:45949262:G:T	ENSG00000112782_CLIC5.12475.48.3_sun_pQTL	ENSG00000112782_CLIC5.12475.48.3_COVID_A1_h	rs35822882	-2.35182	0.995994	-4.30393	-0.399707	0.0182121	Not assessed	Not assessed
4765	0.023881	0.611997	0.0111918	0.286744	0.0661861	7:93935374:C:T	ENSG00000105825_TFPI2.9233.71.3_sun_pQTL	ENSG00000105825_TFPI2.9233.71.3_COVID_A1_h	rs1014177	-1.54	1.17004	-3.83323	0.75323	0.188108	Not assessed	Not assessed
7387	8.54355e-05	0.593101	4.90702e-05	0.340583	0.0661812	4:1761247:G:A	ENSG00000068078_FGFR3.13669.6.3_sun_pQTL	ENSG00000068078_FGFR3.13669.6.3_COVID_B1_h	rs4533828	-0.560094	0.341936	-1.23028	0.110088	0.10142	Not assessed	Not assessed
8937	1.75871e-290	0.547049	1.24372e-290	0.386794	0.0661571	19:51627384:T:A	ENSG00000254415_SIGLEC14.8248.222.3_sun_pQTL	ENSG00000254415_SIGLEC14.8248.222.3_COVID_B2_h	rs1106476	0.0583378	0.0290418	0.00141695	0.115259	0.0445632	Not assessed	Not assessed
5961	0.296932	0.405715	0.097779	0.133535	0.0660388	7:149883279:A:G	ENSG00000214022_REPIN1.13554.78.3_sun_pQTL	ENSG00000214022_REPIN1.13554.78.3_COVID_D1_h	rs4394310	0.915124	0.319493	0.288929	1.54132	0.00417931	Not assessed	Not assessed
6127	0.0423577	0.0271512	0.526883	0.337664	0.0659439	19:10486312:C:A	ENSG00000187266_EPOR.2715.25.2_sun_pQTL	ENSG00000187266_EPOR.2715.25.2_COVID_B2_h	rs45524632	-3.62691	0.671988	-4.94398	-2.30984	6.76547e-08	Not assessed	Not assessed
6376	0.478415	0.200446	0.179893	0.0753052	0.0659412	12:7270611:C:T	ENSG00000139197_PEX5.5915.58.3_sun_pQTL	ENSG00000139197_PEX5.5915.58.3_COVID_C2_h	rs111654488	-0.574538	0.158931	-0.886037	-0.263038	0.00030034	Not assessed	Not assessed
5688	1.9695e-35	0.596378	1.11549e-35	0.337712	0.0659104	1:40098413:G:A	ENSG00000131238_PPT1.9244.27.3_sun_pQTL	ENSG00000131238_PPT1.9244.27.3_COVID_A1_h	rs34805060	0.65311	0.460714	-0.249874	1.55609	0.156307	Not assessed	Not assessed
5322	0.034595	0.506924	0.0250893	0.367571	0.0658214	8:8471238:C:A	ENSG00000176782_DEFB104A.5763.67.3_sun_pQTL	ENSG00000176782_DEFB104A.5763.67.3_COVID_B2_h	rs553751473	0.475445	0.251621	-0.0177236	0.968614	0.0588214	Not assessed	Not assessed
6150	0.367183	0.185478	0.253532	0.128003	0.0658037	11:14441942:C:G	ENSG00000152266_PTH.5954.62.3_sun_pQTL	ENSG00000152266_PTH.5954.62.3_COVID_A1_h	rs12276938	5.551	1.7634	2.0948	9.0072	0.00164449	Not assessed	Not assessed
2952	9.9303e-23	0.723296	2.89762e-23	0.210989	0.0657144	7:73673722:A:G	ENSG00000176410_DNAJC30.7866.11.3_sun_pQTL	ENSG00000176410_DNAJC30.7866.11.3_COVID_A1_h	rs79751000	-0.247525	0.521281	-1.26922	0.774167	0.634901	Not assessed	Not assessed
5615	0.03843	0.546818	0.0229313	0.326222	0.0655991	9:86101436:A:G	ENSG00000135052_GOLM1.8983.7.3_sun_pQTL	ENSG00000135052_GOLM1.8983.7.3_COVID_A1_h	rs11141236	-2.77093	1.18585	-5.09515	-0.446706	0.0194568	Not assessed	Not assessed
8730	4.69715e-06	0.556485	3.19081e-06	0.377959	0.0655484	16:1369946:A:G	ENSG00000090581_GNPTG.10666.7.3_sun_pQTL	ENSG00000090581_GNPTG.10666.7.3_COVID_B1_h	rs11248874	-0.507856	0.277135	-1.05103	0.0353184	0.0668736	Not assessed	Not assessed
5441	2.85649e-06	0.698756	9.64136e-07	0.235781	0.0654592	15:40844687:C:T	ENSG00000104129_DNAJC17.14655.1.3_sun_pQTL	ENSG00000104129_DNAJC17.14655.1.3_COVID_A2_h	rs11549914	-0.208258	0.205772	-0.611564	0.195048	0.3115	Not assessed	Not assessed
7765	5.91296e-13	0.532882	4.45821e-13	0.401713	0.0654054	12:128273364:A:T	ENSG00000181234_TMEM132C.7173.141.3_sun_pQTL	ENSG00000181234_TMEM132C.7173.141.3_COVID_A1_h	rs11059617	-1.04902	0.676356	-2.37465	0.27661	0.120904	Not assessed	Not assessed
6950	2.83402e-11	0.527611	2.18727e-11	0.40714	0.065249	3:105565201:T:C	ENSG00000170017_ALCAM.5451.1.3_sun_pQTL	ENSG00000170017_ALCAM.5451.1.3_COVID_A1_h	rs9830049	-1.23245	0.76183	-2.72561	0.260709	0.105716	Not assessed	Not assessed
6634	7.4162e-34	0.725937	2.13409e-34	0.208831	0.0652318	1:22735058:G:A	ENSG00000133216_EPHB2.8225.86.3_sun_pQTL	ENSG00000133216_EPHB2.8225.86.3_COVID_C2_h	rs6687487	-0.0777965	0.0383943	-0.153048	-0.002545	0.0427392	Not assessed	Not assessed
3371	0.025526	0.654893	0.00954515	0.244824	0.0652115	1:150578851:G:A	ENSG00000143384_MCL1.10358.33.3_sun_pQTL	ENSG00000143384_MCL1.10358.33.3_COVID_A1_h	rs11580946	-1.41265	1.61605	-4.58005	1.75475	0.382043	Not assessed	Not assessed
3996	2.92108e-52	0.674852	1.12566e-52	0.259993	0.0651541	1:196998224:G:A	ENSG00000134389_CFHR5.3666.17.4_sun_pQTL	ENSG00000134389_CFHR5.3666.17.4_COVID_A1_h	rs35662416	0.277879	0.525254	-0.7516	1.30736	0.59678	Not assessed	Not assessed
6637	8.62336e-17	0.725767	2.48571e-17	0.209139	0.0650939	1:22735058:G:A	ENSG00000133216_EPHB2.5077.28.3_sun_pQTL	ENSG00000133216_EPHB2.5077.28.3_COVID_C2_h	rs6687487	-0.104468	0.0515574	-0.205519	-0.00341752	0.0427392	Not assessed	Not assessed
9981	0.265768	0.223503	0.242119	0.20355	0.0650595	8:17082359:A:T	ENSG00000038945_MSR1.11207.3.3_sun_pQTL	ENSG00000038945_MSR1.11207.3.3_COVID_A2_h	rs12545137	1.38954	0.356667	0.690489	2.0886	9.78293e-05	Not assessed	Not assessed
7488	0.141456	0.507265	0.0624274	0.223801	0.0650507	5:55102511:G:C	ENSG00000145649_GZMA.3440.7.2_sun_pQTL	ENSG00000145649_GZMA.3440.7.2_COVID_D1_h	rs3136555	-0.479852	0.241937	-0.954041	-0.00566446	0.0473253	Not assessed	Not assessed
4573	0.402795	0.265115	0.161116	0.10598	0.0649953	5:140135809:A:G	ENSG00000113070_HBEGF.14094.29.3_sun_pQTL	ENSG00000113070_HBEGF.14094.29.3_COVID_C1_h	rs269783	-0.917034	0.242402	-1.39213	-0.441935	0.000154878	Not assessed	Not assessed
6358	0.137008	0.403213	0.100144	0.294657	0.0649777	8:22571238:C:G	ENSG00000120896_SORBS3.12976.49.3_sun_pQTL	ENSG00000120896_SORBS3.12976.49.3_COVID_A1_h	rs55893847	-2.13558	1.177	-4.44245	0.171293	0.0696115	Not assessed	Not assessed
4108	0.0192542	0.673318	0.00674412	0.235777	0.0649063	8:85533122:C:G	ENSG00000133742_CA1.4969.2.1_sun_pQTL	ENSG00000133742_CA1.4969.2.1_COVID_A1_h	rs147156208	0.569495	0.875988	-1.14741	2.2864	0.515616	Not assessed	Not assessed
6902	9.76042e-63	0.666927	3.9259e-63	0.268191	0.064882	2:178424522:CTTCT:C	ENSG00000079150_FKBP7.9288.7.3_sun_pQTL	ENSG00000079150_FKBP7.9288.7.3_COVID_D1_h	rs145766673	0.191205	0.0883163	0.0181086	0.364302	0.0303871	Not assessed	Not assessed
5599	3.0806e-06	0.754309	7.38753e-07	0.180824	0.0648625	15:40844687:C:T	ENSG00000104129_DNAJC17.14655.1.3_sun_pQTL	ENSG00000104129_DNAJC17.14655.1.3_COVID_C1_h	rs11549914	0.13357	0.110514	-0.0830335	0.350174	0.226806	Not assessed	Not assessed
7421	2.40037e-15	0.525418	1.87232e-15	0.409769	0.0648128	11:102779693:C:T	ENSG00000166670_MMP10.8479.4.3_sun_pQTL	ENSG00000166670_MMP10.8479.4.3_COVID_A1_h	rs486055	-1.00729	0.671609	-2.32362	0.309042	0.133663	Not assessed	Not assessed
4551	0.000933372	0.640515	0.000427671	0.293419	0.0647043	1:45773171:C:T	ENSG00000117450_PRDX1.3855.56.1_sun_pQTL	ENSG00000117450_PRDX1.3855.56.1_COVID_A1_h	rs61783167	-1.24307	1.05831	-3.31731	0.831169	0.24016	Not assessed	Not assessed
5028	0.32317	0.263924	0.191713	0.156502	0.0646922	15:41526719:G:A	ENSG00000092445_TYRO3.2611.72.2_sun_pQTL	ENSG00000092445_TYRO3.2611.72.2_COVID_A1_h	rs1473781	2.81135	1.32225	0.219785	5.40292	0.033488	Not assessed	Not assessed
7234	7.22209e-20	0.555756	4.93371e-20	0.379595	0.0646493	19:51001552:G:A	ENSG00000129455_KLK8.2834.54.1_sun_pQTL	ENSG00000129455_KLK8.2834.54.1_COVID_A1_h	rs74705037	-1.13181	0.669575	-2.44416	0.180529	0.0909616	Not assessed	Not assessed
7237	2.32359e-45	0.555701	1.58775e-45	0.379656	0.0646429	19:51001552:G:A	ENSG00000129455_KLK8.13708.56.3_sun_pQTL	ENSG00000129455_KLK8.13708.56.3_COVID_A1_h	rs74705037	-0.799106	0.472747	-1.72567	0.127461	0.0909616	Not assessed	Not assessed
7706	1.46348e-92	0.624051	7.30417e-93	0.311397	0.0645529	4:75927078:C:T	ENSG00000138744_NAAA.3173.49.2_sun_pQTL	ENSG00000138744_NAAA.3173.49.2_COVID_C2_h	rs9996608	0.0597174	0.0269061	0.00698241	0.112452	0.0264545	Not assessed	Not assessed
7661	4.02536e-33	0.619212	2.0562e-33	0.316236	0.0645518	21:36074301:C:A	ENSG00000159228_CBR1.12381.26.3_sun_pQTL	ENSG00000159228_CBR1.12381.26.3_COVID_A2_h	rs16993864	0.130656	0.0820698	-0.0301979	0.29151	0.111382	Not assessed	Not assessed
7936	2.03e-15	0.605108	1.10869e-15	0.330416	0.0644764	16:57360481:T:C	ENSG00000102962_CCL22.3508.78.3_sun_pQTL	ENSG00000102962_CCL22.3508.78.3_COVID_B2_h	rs41398344	-0.156629	0.119311	-0.390474	0.0772156	0.189256	Not assessed	Not assessed
7129	0.39227	0.175136	0.25454	0.113579	0.064474	20:47764407:CCT:C	ENSG00000196562_SULF2.8305.18.3_sun_pQTL	ENSG00000196562_SULF2.8305.18.3_COVID_C1_h	rs34149868	-1.30093	0.287729	-1.86487	-0.736996	6.14352e-06	Not assessed	Not assessed
7993	4.51196e-110	0.667965	1.80777e-110	0.267564	0.0644712	19:5830291:G:A	ENSG00000130383_FUT5.4549.78.2_sun_pQTL	ENSG00000130383_FUT5.4549.78.2_COVID_B2_h	rs778809	-0.0805603	0.0374931	-0.154045	-0.00707521	0.0316605	Not assessed	Not assessed
7386	9.73528e-09	0.571587	6.19983e-09	0.363946	0.064467	11:124756673:G:A	ENSG00000149564_ESAM.7841.84.3_sun_pQTL	ENSG00000149564_ESAM.7841.84.3_COVID_A2_h	rs61753651	0.289746	0.18876	-0.0802166	0.659708	0.124784	Not assessed	Not assessed
6645	0	0.59796	0	0.337587	0.0644529	11:118206239:C:G	ENSG00000160593_AMICA1.8232.90.3_sun_pQTL	ENSG00000160593_AMICA1.8232.90.3_COVID_B1_h	rs11600544	-0.0761973	0.0412676	-0.15708	0.00468563	0.064831	Not assessed	Not assessed
4378	3.35971e-28	0.773098	7.0652e-29	0.162512	0.0643904	10:75166013:T:C	ENSG00000079393_DUSP13.6525.17.3_sun_pQTL	ENSG00000079393_DUSP13.6525.17.3_COVID_B2_h	rs7899946	-0.171814	0.0727364	-0.314375	-0.0292535	0.0181693	Not assessed	Not assessed
5938	0.0390506	0.0154913	0.631027	0.250263	0.064169	17:49863303:C:T	ENSG00000121067_SPOP.13727.44.3_sun_pQTL	ENSG00000121067_SPOP.13727.44.3_COVID_B2_h	rs77534576	-3.32781	0.642382	-4.58685	-2.06876	2.21389e-07	Not assessed	Not assessed
7662	5.64136e-79	0.630514	2.73298e-79	0.305392	0.0640938	1:169696410:G:T	ENSG00000188404_SELL.4831.4.2_sun_pQTL	ENSG00000188404_SELL.4831.4.2_COVID_A2_h	rs4987358	-0.123642	0.059243	-0.239756	-0.00752771	0.0368855	Not assessed	Not assessed
5629	1.73799e-05	0.761845	3.97292e-06	0.174088	0.0640453	9:34593088:G:A	ENSG00000122756_CNTFR.14101.2.3_sun_pQTL	ENSG00000122756_CNTFR.14101.2.3_COVID_C2_h	rs10972159	-0.1051	0.058179	-0.219129	0.00892861	0.0708409	Not assessed	Not assessed
6012	0.0105906	0.564209	0.00665606	0.354534	0.0640112	1:16187431:A:G	ENSG00000142627_EPHA2.4834.61.2_sun_pQTL	ENSG00000142627_EPHA2.4834.61.2_COVID_B1_h	rs924204	-0.678061	0.315834	-1.29708	-0.0590373	0.0318021	Not assessed	Not assessed
6232	0.449153	0.275794	0.130809	0.080257	0.0639861	17:32494366:T:C	ENSG00000141316_SPACA3.8076.4.3_sun_pQTL	ENSG00000141316_SPACA3.8076.4.3_COVID_B2_h	rs756787	-0.970916	0.284648	-1.52882	-0.413016	0.000647403	Not assessed	Not assessed
4715	0.0245127	0.663786	0.00882555	0.238926	0.06395	3:52476576:G:A	ENSG00000010322_NISCH.12738.43.3_sun_pQTL	ENSG00000010322_NISCH.12738.43.3_COVID_B1_h	rs9856575	0.353074	0.33728	-0.307983	1.01413	0.295179	Not assessed	Not assessed
4404	1.34437e-38	0.728932	3.8225e-39	0.207196	0.063872	1:196334759:T:C	ENSG00000134389_CFHR5.7885.17.3_sun_pQTL	ENSG00000134389_CFHR5.7885.17.3_COVID_B2_h	rs72732234	-0.096932	0.0810595	-0.255806	0.0619417	0.23177	Not assessed	Not assessed
5434	5.031e-22	0.611945	2.66602e-22	0.324217	0.0638375	5:103567942:A:G	ENSG00000112874_NUDT12.13947.371.3_sun_pQTL	ENSG00000112874_NUDT12.13947.371.3_COVID_A1_h	rs74692061	0.575319	0.515069	-0.434198	1.58484	0.264005	Not assessed	Not assessed
6294	0	0.693384	0	0.242784	0.0638324	7:130298758:G:T	ENSG00000128510_CPA4.9267.2.3_sun_pQTL	ENSG00000128510_CPA4.9267.2.3_COVID_B2_h	rs34587586	-0.0430949	0.0213313	-0.0849034	-0.00128634	0.0433557	Not assessed	Not assessed
6319	2.96356e-11	0.667025	1.19625e-11	0.269183	0.063792	20:45296914:A:G	ENSG00000124159_MATN4.7083.74.3_sun_pQTL	ENSG00000124159_MATN4.7083.74.3_COVID_D1_h	rs11697677	-0.258042	0.13111	-0.515012	-0.00107156	0.0490523	Not assessed	Not assessed
5707	9.17896e-05	0.693493	3.21194e-05	0.242606	0.0637779	10:87414976:T:G	ENSG00000107789_MINPP1.5586.66.3_sun_pQTL	ENSG00000107789_MINPP1.5586.66.3_COVID_B2_h	rs3128161	0.436655	0.159519	0.124003	0.749307	0.00619419	Not assessed	Not assessed
6311	4.84245e-05	0.574796	3.04509e-05	0.361387	0.0637382	11:130104033:A:G	ENSG00000084234_APLP2.10627.87.3_sun_pQTL	ENSG00000084234_APLP2.10627.87.3_COVID_A1_h	rs6590438	-1.33874	0.836168	-2.97759	0.300123	0.109369	Not assessed	Not assessed
7166	0	0.547108	0	0.389181	0.0637106	5:9547130:G:A	ENSG00000112902_SEMA5A.13132.14.3_sun_pQTL	ENSG00000112902_SEMA5A.13132.14.3_COVID_A1_h	rs17329170	-0.294232	0.200901	-0.68799	0.0995266	0.14304	Not assessed	Not assessed
6970	0.0797074	0.46306	0.0578126	0.335798	0.063622	17:3016329:G:C	ENSG00000213977_TAX1BP3.12498.12.3_sun_pQTL	ENSG00000213977_TAX1BP3.12498.12.3_COVID_A1_h	rs12452840	2.16977	1.25161	-0.283328	4.62287	0.0829905	Not assessed	Not assessed
7063	3.41924e-11	0.665342	1.39324e-11	0.271044	0.0636139	20:24919899:A:G	ENSG00000101474_APMAP.10605.22.3_sun_pQTL	ENSG00000101474_APMAP.10605.22.3_COVID_B1_h	rs6050131	0.48816	0.215482	0.0658241	0.910496	0.0234858	Not assessed	Not assessed
3994	1.25879e-38	0.676068	4.84844e-39	0.260335	0.0635969	1:196334759:T:C	ENSG00000134389_CFHR5.7885.17.3_sun_pQTL	ENSG00000134389_CFHR5.7885.17.3_COVID_A1_h	rs72732234	-0.138427	0.336829	-0.7986	0.521747	0.681095	Not assessed	Not assessed
5781	3.16165e-62	0.581755	1.92786e-62	0.354669	0.0635763	18:31633396:C:CT	ENSG00000118276_B4GALT6.10832.24.3_sun_pQTL	ENSG00000118276_B4GALT6.10832.24.3_COVID_A1_h	rs201022770	0.645572	0.431216	-0.199597	1.49074	0.134368	Not assessed	Not assessed
6487	9.23914e-08	0.554568	6.36516e-08	0.381998	0.0634345	18:31093950:T:A	ENSG00000134755_DSC2.13126.52.3_sun_pQTL	ENSG00000134755_DSC2.13126.52.3_COVID_A1_h	rs1789063	-1.08166	0.795229	-2.64028	0.476963	0.173772	Not assessed	Not assessed
6270	1.16925e-05	0.698191	3.993e-06	0.23837	0.063423	7:134450869:T:C	ENSG00000085662_AKR1B1.9854.36.3_sun_pQTL	ENSG00000085662_AKR1B1.9854.36.3_COVID_D1_h	rs2229542	0.193416	0.16376	-0.127547	0.514379	0.237563	Not assessed	Not assessed
6442	9.11341e-58	0.560798	6.10786e-58	0.375787	0.063415	9:117713024:A:G	ENSG00000136869_TLR4.LY96.3647.49.4_sun_pQTL	ENSG00000136869_TLR4.LY96.3647.49.4_COVID_A1_h	rs4986790	0.384333	0.279133	-0.162757	0.931424	0.168549	Not assessed	Not assessed
6124	0.192064	0.122986	0.378946	0.24259	0.0634141	19:10486312:C:A	ENSG00000187266_EPOR.2715.25.2_sun_pQTL	ENSG00000187266_EPOR.2715.25.2_COVID_A2_h	rs45524632	-3.87124	0.803958	-5.44697	-2.29551	1.47032e-06	Not assessed	Not assessed
5525	2.86928e-06	0.68817	1.03601e-06	0.248415	0.0634112	15:40844687:C:T	ENSG00000104129_DNAJC17.14655.1.3_sun_pQTL	ENSG00000104129_DNAJC17.14655.1.3_COVID_B1_h	rs11549914	-0.0689829	0.310547	-0.677644	0.539678	0.82421	Not assessed	Not assessed
6521	0	0.672358	0	0.264273	0.063369	1:160750284:C:T	ENSG00000026751_SLAMF7.5487.7.3_sun_pQTL	ENSG00000026751_SLAMF7.5487.7.3_COVID_C2_h	rs11581248	-0.0370795	0.01784	-0.0720451	-0.00211378	0.037668	Not assessed	Not assessed
5495	2.95802e-60	0.602587	1.64035e-60	0.334098	0.0633146	3:53858803:T:C	ENSG00000056736_IL17RB.5084.154.3_sun_pQTL	ENSG00000056736_IL17RB.5084.154.3_COVID_A1_h	rs2232346	0.478947	0.37052	-0.247258	1.20515	0.196137	Not assessed	Not assessed
6917	0.347422	0.229827	0.216418	0.143102	0.0632315	2:214294429:C:T	ENSG00000174453_VWC2L.7995.16.3_sun_pQTL	ENSG00000174453_VWC2L.7995.16.3_COVID_D1_h	rs2052442	-0.865178	0.289939	-1.43345	-0.296908	0.00284506	Not assessed	Not assessed
6378	3.78156e-62	0.695166	1.3148e-62	0.241637	0.063197	18:31633396:C:CT	ENSG00000118276_B4GALT6.10832.24.3_sun_pQTL	ENSG00000118276_B4GALT6.10832.24.3_COVID_D1_h	rs201022770	-0.124746	0.0848521	-0.291053	0.0415613	0.14152	Not assessed	Not assessed
9595	0.186786	0.307031	0.167601	0.275432	0.0631499	7:2098661:G:A	ENSG00000106266_SNX8.6925.26.3_sun_pQTL	ENSG00000106266_SNX8.6925.26.3_COVID_A2_h	rs3778965	-1.13473	0.335795	-1.79288	-0.476589	0.000726842	Not assessed	Not assessed
7869	6.85629e-19	0.543065	4.97292e-19	0.393826	0.0631093	2:240506923:C:T	ENSG00000063660_GPC1.8697.38.3_sun_pQTL	ENSG00000063660_GPC1.8697.38.3_COVID_A1_h	rs4074478	0.874439	0.622634	-0.345901	2.09478	0.160194	Not assessed	Not assessed
7514	0	0.656897	0	0.280031	0.0630726	20:1915243:G:C	ENSG00000198053_SIRPA.5430.66.3_sun_pQTL	ENSG00000198053_SIRPA.5430.66.3_COVID_D1_h	rs1057114	-0.050845	0.0264411	-0.102669	0.000978504	0.0544854	Not assessed	Not assessed
5832	0.00700001	0.594806	0.00389899	0.331243	0.0630517	14:20488615:T:C	ENSG00000198805_PNP.10039.32.3_sun_pQTL	ENSG00000198805_PNP.10039.32.3_COVID_A1_h	rs1756361	1.75737	1.12055	-0.438856	3.9536	0.116807	Not assessed	Not assessed
5362	2.67075e-09	0.608198	1.44438e-09	0.32886	0.0629421	19:531115:C:T	ENSG00000197540_GZMM.5704.74.3_sun_pQTL	ENSG00000197540_GZMM.5704.74.3_COVID_A1_h	rs16989724	1.18013	0.971973	-0.724902	3.08516	0.224687	Not assessed	Not assessed
4738	1.2054e-20	0.645219	5.45383e-21	0.291867	0.0629142	12:112921352:T:C	ENSG00000089127_OAS1.10361.25.3_sun_pQTL	ENSG00000089127_OAS1.10361.25.3_COVID_A1_h	rs4767027	0.672195	0.603036	-0.509733	1.85412	0.264985	Not assessed	Not assessed
7706	0.253682	0.151311	0.333347	0.198765	0.0628949	4:100166511:A:G	ENSG00000196616_ADH1B.9834.62.3_sun_pQTL	ENSG00000196616_ADH1B.9834.62.3_COVID_B2_h	rs114833388	-2.50529	0.480402	-3.44686	-1.56372	1.83833e-07	Not assessed	Not assessed
5257	0.0700394	0.547021	0.0363373	0.283738	0.0628638	17:50295678:A:G	ENSG00000136457_CHAD.13460.4.3_sun_pQTL	ENSG00000136457_CHAD.13460.4.3_COVID_A1_h	rs137903671	1.85618	1.05518	-0.211941	3.92429	0.0785593	Not assessed	Not assessed
3242	6.93236e-09	0.706687	2.26142e-09	0.230467	0.0628464	16:67509619:G:A	ENSG00000159723_AGRP.2813.11.2_sun_pQTL	ENSG00000159723_AGRP.2813.11.2_COVID_A1_h	rs60697456	-0.0575415	0.671289	-1.37324	1.25816	0.931691	Not assessed	Not assessed
7755	1.38218e-39	0.649412	6.12776e-40	0.287848	0.0627399	7:49772968:C:A	ENSG00000188730_VWC2.11121.56.3_sun_pQTL	ENSG00000188730_VWC2.11121.56.3_COVID_D1_h	rs79259707	0.143826	0.0766569	-0.0064186	0.294071	0.0606234	Not assessed	Not assessed
5173	1.72948e-17	0.6209	8.81395e-18	0.316368	0.0627323	5:95682148:T:G	ENSG00000175449_RFESD.13603.7.3_sun_pQTL	ENSG00000175449_RFESD.13603.7.3_COVID_A1_h	rs77881626	0.668821	0.68153	-0.666954	2.0046	0.326419	Not assessed	Not assessed
8786	7.49871e-45	0.544708	5.40508e-45	0.392563	0.062729	10:13234368:G:A	ENSG00000165623_UCMA.10977.55.3_sun_pQTL	ENSG00000165623_UCMA.10977.55.3_COVID_A2_h	rs2399954	-0.14204	0.0740564	-0.287188	0.00310761	0.0551109	Not assessed	Not assessed
4985	1.2285e-05	0.640942	5.68196e-06	0.29638	0.0626601	7:87416268:A:G	ENSG00000005469_CROT.13929.27.3_sun_pQTL	ENSG00000005469_CROT.13929.27.3_COVID_A1_h	rs31662	1.35416	0.984479	-0.575382	3.28371	0.168973	Not assessed	Not assessed
4156	5.38878e-162	0.677942	2.06244e-162	0.259406	0.062652	3:52786995:A:G	ENSG00000055957_ITIH1.7955.195.3_sun_pQTL	ENSG00000055957_ITIH1.7955.195.3_COVID_A1_h	rs1042779	0.278973	0.245258	-0.201723	0.759669	0.255343	Not assessed	Not assessed
7852	2.47963e-135	0.661757	1.03289e-135	0.275592	0.0626506	5:157105355:C:A	ENSG00000135077_HAVCR2.5134.52.2_sun_pQTL	ENSG00000135077_HAVCR2.5134.52.2_COVID_B2_h	rs7445342	0.0834276	0.0422583	0.0006028	0.166252	0.0483558	Not assessed	Not assessed
7843	5.16414e-303	0.549743	3.64203e-303	0.387646	0.0626107	19:54633642:G:C	ENSG00000104972_LILRB1.5090.49.2_sun_pQTL	ENSG00000104972_LILRB1.5090.49.2_COVID_B1_h	rs2114511	-0.0651639	0.0392019	-0.141998	0.0116704	0.0964599	Not assessed	Not assessed
6174	8.2663e-60	0.579403	5.10856e-60	0.358008	0.062589	1:161538827:A:G	ENSG00000162747_FCGR3B.3311.27.1_sun_pQTL	ENSG00000162747_FCGR3B.3311.27.1_COVID_A1_h	rs10919543	0.486607	0.367907	-0.234478	1.20769	0.185957	Not assessed	Not assessed
5921	2.16589e-05	0.568198	1.40767e-05	0.369226	0.0625396	9:71647696:A:G	ENSG00000135048_TMEM2.8992.1.3_sun_pQTL	ENSG00000135048_TMEM2.8992.1.3_COVID_A1_h	rs1410986	-1.54246	0.965724	-3.43525	0.350323	0.11022	Not assessed	Not assessed
4392	0.0144207	0.635856	0.00637064	0.280839	0.0625136	2:162182309:C:T	ENSG00000078098_FAP.5029.3.1_sun_pQTL	ENSG00000078098_FAP.5029.3.1_COVID_A1_h	rs78034415	-0.0787862	1.50807	-3.03454	2.87697	0.958335	Not assessed	Not assessed
3727	0.0250409	0.668535	0.00881516	0.235282	0.0623262	3:52476576:G:A	ENSG00000010322_NISCH.12738.43.3_sun_pQTL	ENSG00000010322_NISCH.12738.43.3_COVID_A1_h	rs9856575	-1.04495	1.37193	-3.73388	1.64399	0.446261	Not assessed	Not assessed
8713	5.52576e-12	0.630217	2.6968e-12	0.30751	0.0622728	10:14820083:C:G	ENSG00000185267_CDNF.4962.52.1_sun_pQTL	ENSG00000185267_CDNF.4962.52.1_COVID_C1_h	rs61738953	-0.138147	0.0801557	-0.295249	0.0189552	0.084801	Not assessed	Not assessed
8428	0.23377	0.282785	0.190678	0.230595	0.0621729	18:9037478:A:G	ENSG00000101558_VAPA.7167.102.3_sun_pQTL	ENSG00000101558_VAPA.7167.102.3_COVID_A2_h	rs28412968	-2.0558	0.48875	-3.01373	-1.09787	2.59656e-05	Not assessed	Not assessed
8363	1.29566e-11	0.588089	7.70686e-12	0.349745	0.062166	6:7883235:C:T	ENSG00000239264_TXNDC5.11212.7.3_sun_pQTL	ENSG00000239264_TXNDC5.11212.7.3_COVID_B1_h	rs111331197	0.240375	0.193158	-0.138208	0.618957	0.213335	Not assessed	Not assessed
5997	0.0528556	0.0537187	0.412309	0.41898	0.0621364	6:43231992:T:C	ENSG00000171462_DLK2.9359.9.3_sun_pQTL	ENSG00000171462_DLK2.9359.9.3_COVID_C1_h	rs114371775	-1.39199	0.312521	-2.00452	-0.779457	8.42637e-06	Not assessed	Not assessed
4779	0.00311589	0.625127	0.00153621	0.30814	0.0620807	22:29150904:C:T	ENSG00000183762_KREMEN1.6512.68.3_sun_pQTL	ENSG00000183762_KREMEN1.6512.68.3_COVID_A1_h	rs74663246	0.853634	0.968953	-1.04548	2.75275	0.378326	Not assessed	Not assessed
4986	5.25438e-13	0.642607	2.41525e-13	0.295321	0.0620726	15:65400920:C:T	ENSG00000103742_IGDCC4.9793.145.3_sun_pQTL	ENSG00000103742_IGDCC4.9793.145.3_COVID_A1_h	rs35223184	0.561116	0.713203	-0.836737	1.95897	0.431426	Not assessed	Not assessed
6637	1.25774e-12	0.728138	3.62514e-13	0.209807	0.0620551	1:22735058:G:A	ENSG00000133216_EPHB2.8348.4.3_sun_pQTL	ENSG00000133216_EPHB2.8348.4.3_COVID_C2_h	rs6687487	-0.117192	0.0578371	-0.230551	-0.00383378	0.0427392	Not assessed	Not assessed
7149	0.393313	0.184192	0.245537	0.114925	0.0620329	19:39987036:C:G	ENSG00000174521_TTC9B.9386.42.3_sun_pQTL	ENSG00000174521_TTC9B.9386.42.3_COVID_C1_h	rs8113194	0.754334	0.191165	0.379658	1.12901	7.9472e-05	Not assessed	Not assessed
7119	1.80082e-40	0.643293	8.25415e-41	0.294794	0.0619131	6:36871822:C:G	ENSG00000137168_PPIL1.9884.8.3_sun_pQTL	ENSG00000137168_PPIL1.9884.8.3_COVID_B1_h	rs12194408	-0.167061	0.138047	-0.437629	0.103506	0.226211	Not assessed	Not assessed
6863	3.8397e-06	0.572378	2.45428e-06	0.365794	0.0618217	11:126201454:G:T	ENSG00000150455_TIRAP.9839.148.3_sun_pQTL	ENSG00000150455_TIRAP.9839.148.3_COVID_A1_h	rs111577916	-1.33124	0.877484	-3.05108	0.388594	0.129238	Not assessed	Not assessed
6624	5.22415e-32	0.572388	3.33965e-32	0.36585	0.0617623	22:36933406:G:A	ENSG00000100368_CSF2RB.10512.13.3_sun_pQTL	ENSG00000100368_CSF2RB.10512.13.3_COVID_A1_h	rs1534881	0.630621	0.464661	-0.280099	1.54134	0.17473	Not assessed	Not assessed
9070	0.276497	0.156115	0.32328	0.182467	0.0616404	16:89196249:G:A	ENSG00000129910_CDH15.5410.53.3_sun_pQTL	ENSG00000129910_CDH15.5410.53.3_COVID_B2_h	rs117169628	1.60401	0.359257	0.899879	2.30814	8.01452e-06	Not assessed	Not assessed
6001	3.27598e-05	0.713265	1.03415e-05	0.225099	0.0615925	1:223824215:C:G	ENSG00000162909_CAPN2.14684.17.3_sun_pQTL	ENSG00000162909_CAPN2.14684.17.3_COVID_B2_h	rs11806886	-0.296932	0.1632	-0.616798	0.0229337	0.0688446	Not assessed	Not assessed
5742	5.00235e-26	0.599865	2.82393e-26	0.338575	0.0615605	1:193105381:A:G	ENSG00000023572_GLRX2.12486.8.3_sun_pQTL	ENSG00000023572_GLRX2.12486.8.3_COVID_A1_h	rs148212596	1.0659	0.740441	-0.385343	2.51713	0.149997	Not assessed	Not assessed
5505	1.9756e-29	0.411368	2.53163e-29	0.527085	0.0615475	1:43975097:G:C	ENSG00000117411_B4GALT2.9595.11.3_sun_pQTL	ENSG00000117411_B4GALT2.9595.11.3_COVID_A2_h	rs2286241	0.174666	0.0902704	-0.00226112	0.351592	0.0530006	Not assessed	Not assessed
5669	4.86201e-18	0.679643	1.85195e-18	0.258817	0.0615401	1:43307362:A:G	ENSG00000066056_TIE1.2844.53.2_sun_pQTL	ENSG00000066056_TIE1.2844.53.2_COVID_B1_h	rs2275180	-0.296044	0.197218	-0.682585	0.0904966	0.13333	Not assessed	Not assessed
7856	6.6678e-32	0.537585	4.97346e-32	0.40092	0.0614949	4:57076157:T:C	ENSG00000163453_IGFBP7.3320.49.2_sun_pQTL	ENSG00000163453_IGFBP7.3320.49.2_COVID_A1_h	rs1718849	0.64021	0.529206	-0.397015	1.67743	0.226373	Not assessed	Not assessed
5299	0.000268299	0.625958	0.000133886	0.312303	0.0613363	5:177324058:G:A	ENSG00000169223_LMAN2.9468.8.3_sun_pQTL	ENSG00000169223_LMAN2.9468.8.3_COVID_A1_h	rs151014368	1.21567	0.913666	-0.57508	3.00642	0.183339	Not assessed	Not assessed
7845	0	0.584648	0	0.354024	0.0613283	9:133257521:T:TC	ENSG00000175164_ABO.9253.52.3_sun_pQTL	ENSG00000175164_ABO.9253.52.3_COVID_D1_h	rs8176719	0.0603246	0.0320076	-0.00240918	0.123058	0.059471	Not assessed	Not assessed
4568	1.85123e-10	0.632101	8.98158e-11	0.306614	0.0612842	12:56345773:A:G	ENSG00000175336_APOF.12370.30.3_sun_pQTL	ENSG00000175336_APOF.12370.30.3_COVID_C1_h	rs111580405	0.25383	0.0927921	0.0719612	0.435699	0.00622906	Not assessed	Not assessed
3679	2.3736e-81	0.668658	9.58923e-82	0.270073	0.061269	1:150764744:A:G	ENSG00000163131_CTSS.3181.50.2_sun_pQTL	ENSG00000163131_CTSS.3181.50.2_COVID_A1_h	rs41271951	0.275468	0.341336	-0.393539	0.944475	0.419651	Not assessed	Not assessed
8079	3.97575e-08	0.645055	1.8105e-08	0.293687	0.0612584	7:45914866:G:A	ENSG00000146674_IGFBP3.2571.12.3_sun_pQTL	ENSG00000146674_IGFBP3.2571.12.3_COVID_D1_h	rs145188037	-0.148204	0.114087	-0.37181	0.0754014	0.193927	Not assessed	Not assessed
5638	0.00101969	0.593235	0.00059123	0.343904	0.0612501	19:44813447:T:A	ENSG00000187244_BCAM.2816.50.2_sun_pQTL	ENSG00000187244_BCAM.2816.50.2_COVID_A1_h	rs28399656	1.33677	0.896003	-0.419362	3.09291	0.135718	Not assessed	Not assessed
2979	1.19868e-70	0.720185	3.63973e-71	0.218619	0.0611952	7:143406124:G:A	ENSG00000146904_EPHA1.3431.54.2_sun_pQTL	ENSG00000146904_EPHA1.3431.54.2_COVID_A1_h	rs4421280	-0.153273	0.310321	-0.761491	0.454944	0.621363	Not assessed	Not assessed
5380	1.16162e-12	0.627758	5.7571e-13	0.311063	0.0611791	17:56778779:A:G	ENSG00000183691_NOG.5846.24.3_sun_pQTL	ENSG00000183691_NOG.5846.24.3_COVID_A1_h	rs79084672	-0.326777	0.584954	-1.47327	0.819713	0.57641	Not assessed	Not assessed
2492	0.000403078	0.747931	0.000102658	0.190425	0.0611386	16:30119172:C:A	ENSG00000102882_MAPK3.2855.49.2_sun_pQTL	ENSG00000102882_MAPK3.2855.49.2_COVID_A1_h	rs11865086	-1.59502	1.25812	-4.06089	0.870844	0.204875	Not assessed	Not assessed
5451	3.32564e-05	0.606117	1.82606e-05	0.332748	0.0610837	1:109736980:T:G	ENSG00000134184_GSTM1.7239.9.3_sun_pQTL	ENSG00000134184_GSTM1.7239.9.3_COVID_A1_h	rs2234696	-1.16343	0.948539	-3.02253	0.695671	0.219991	Not assessed	Not assessed
7709	4.0742e-06	0.604527	2.25426e-06	0.334424	0.061042	11:126201454:G:T	ENSG00000150455_TIRAP.9839.148.3_sun_pQTL	ENSG00000150455_TIRAP.9839.148.3_COVID_B1_h	rs111577916	-0.363413	0.293394	-0.938455	0.211628	0.215474	Not assessed	Not assessed
7177	8.04741e-49	0.591506	4.72838e-49	0.347488	0.061006	1:103524734:C:T	ENSG00000237763_AMY1A.7918.114.3_sun_pQTL	ENSG00000237763_AMY1A.7918.114.3_COVID_B1_h	rs7538379	-0.156227	0.11279	-0.37729	0.0648372	0.166018	Not assessed	Not assessed
6482	9.26163e-43	0.60709	5.06453e-43	0.331913	0.0609965	20:58997654:A:G	ENSG00000101160_CTSZ.4971.1.1_sun_pQTL	ENSG00000101160_CTSZ.4971.1.1_COVID_A2_h	rs199825459	0.133749	0.11849	-0.0984876	0.365986	0.258992	Not assessed	Not assessed
5061	0.00109148	0.631425	0.000528991	0.305963	0.0609923	8:98033638:G:A	ENSG00000132561_MATN2.3325.2.2_sun_pQTL	ENSG00000132561_MATN2.3325.2.2_COVID_A1_h	rs17831160	-0.965881	1.07571	-3.07423	1.14247	0.369237	Not assessed	Not assessed
9788	3.71919e-08	0.597031	2.13111e-08	0.34204	0.0609294	5:116444277:C:T	ENSG00000092421_SEMA6A.7945.10.3_sun_pQTL	ENSG00000092421_SEMA6A.7945.10.3_COVID_C1_h	rs3733724	0.178131	0.0891234	0.00345208	0.352809	0.0456411	Not assessed	Not assessed
4642	0.000837703	0.588625	0.000496964	0.349138	0.060902	1:72246924:A:T	ENSG00000172260_NEGR1.7050.5.3_sun_pQTL	ENSG00000172260_NEGR1.7050.5.3_COVID_A1_h	rs2126077	-1.1416	1.05222	-3.20391	0.92071	0.277946	Not assessed	Not assessed
7183	2.77472e-07	0.731039	7.9004e-08	0.208086	0.0608742	19:45317925:T:C	ENSG00000104879_CKM.2670.67.4_sun_pQTL	ENSG00000104879_CKM.2670.67.4_COVID_C2_h	rs11559024	-0.123855	0.0777077	-0.27616	0.028449	0.110967	Not assessed	Not assessed
6695	1.1613e-32	0.577423	7.27759e-33	0.361796	0.0607813	19:32582525:G:A	ENSG00000105185_PDCD5.12517.52.3_sun_pQTL	ENSG00000105185_PDCD5.12517.52.3_COVID_A1_h	rs4499344	0.603729	0.463616	-0.304941	1.5124	0.192842	Not assessed	Not assessed
5168	1.4297e-37	0.613536	7.59071e-38	0.325685	0.0607794	2:108986407:T:C	ENSG00000135960_EDAR.2977.7.2_sun_pQTL	ENSG00000135960_EDAR.2977.7.2_COVID_A1_h	rs116475987	-0.456805	0.593712	-1.62046	0.706848	0.441652	Not assessed	Not assessed
7236	0.199817	0.425025	0.100569	0.213857	0.0607319	22:36959875:G:A	ENSG00000128309_MPST.12686.15.3_sun_pQTL	ENSG00000128309_MPST.12686.15.3_COVID_D1_h	rs73158171	-1.27413	0.380249	-2.01941	-0.528859	0.000805824	Not assessed	Not assessed
5235	4.05773e-15	0.625556	2.03584e-15	0.313793	0.0606503	11:119336631:G:A	ENSG00000223953_C1QTNF5.7810.20.3_sun_pQTL	ENSG00000223953_C1QTNF5.7810.20.3_COVID_A1_h	rs2248863	0.743698	0.644189	-0.518889	2.00629	0.248307	Not assessed	Not assessed
4284	0.0298243	0.638176	0.0121179	0.259236	0.0606456	2:27203494:G:A	ENSG00000115216_NRBP1.12616.45.3_sun_pQTL	ENSG00000115216_NRBP1.12616.45.3_COVID_A1_h	rs2580761	1.72375	1.35472	-0.931456	4.37895	0.203231	Not assessed	Not assessed
7336	4.25462e-16	0.542438	3.11372e-16	0.39692	0.0606429	14:20965208:A:C	ENSG00000169385_RNASE2.8394.56.3_sun_pQTL	ENSG00000169385_RNASE2.8394.56.3_COVID_A1_h	rs56204594	-0.875824	0.626923	-2.10457	0.352922	0.162408	Not assessed	Not assessed
3854	8.17321e-14	0.804926	1.36597e-14	0.134465	0.0606093	7:142800839:T:C	ENSG00000275896_PRSS2.5034.79.1_sun_pQTL	ENSG00000275896_PRSS2.5034.79.1_COVID_C2_h	rs1799886	-0.132348	0.0617086	-0.253294	-0.0114011	0.0319751	Not assessed	Not assessed
4893	1.33705e-21	0.63453	6.42849e-22	0.30502	0.0604508	13:52397382:C:T	ENSG00000136114_THSD1.5621.64.3_sun_pQTL	ENSG00000136114_THSD1.5621.64.3_COVID_A1_h	rs41292808	0.0613379	0.678265	-1.26804	1.39071	0.927943	Not assessed	Not assessed
10057	1.06499e-21	0.697414	3.6987e-22	0.24215	0.0604355	10:5973234:T:C	ENSG00000134470_IL15RA.3445.53.2_sun_pQTL	ENSG00000134470_IL15RA.3445.53.2_COVID_C1_h	rs8177654	0.115198	0.0573571	0.00277977	0.227615	0.0445978	Not assessed	Not assessed
6030	1.31828e-88	0.573027	8.4342e-89	0.366554	0.0604186	1:204979531:A:G	ENSG00000163531_NFASC.7179.69.3_sun_pQTL	ENSG00000163531_NFASC.7179.69.3_COVID_A1_h	rs6667532	-0.351228	0.290664	-0.920918	0.218463	0.226907	Not assessed	Not assessed
6904	0.206214	0.331477	0.15416	0.247742	0.060408	9:22369401:A:G	ENSG00000099810_MTAP.9910.9.3_sun_pQTL	ENSG00000099810_MTAP.9910.9.3_COVID_B1_h	rs72695383	1.3745	0.475687	0.442175	2.30683	0.00385838	Not assessed	Not assessed
8010	7.15173e-45	0.52012	5.7693e-45	0.41952	0.0603592	10:13234368:G:A	ENSG00000165623_UCMA.10977.55.3_sun_pQTL	ENSG00000165623_UCMA.10977.55.3_COVID_A1_h	rs2399954	0.59132	0.414438	-0.220963	1.4036	0.153638	Not assessed	Not assessed
8303	1.72173e-23	0.70499	5.73302e-24	0.234687	0.0603225	3:98790861:G:A	ENSG00000057019_DCBLD2.9338.2.3_sun_pQTL	ENSG00000057019_DCBLD2.9338.2.3_COVID_B2_h	rs72934623	-0.145213	0.0733392	-0.288955	-0.00147093	0.0477012	Not assessed	Not assessed
7491	6.27525e-30	0.52477	4.96236e-30	0.414919	0.060311	19:7693377:G:A	ENSG00000104921_FCER2.3291.30.2_sun_pQTL	ENSG00000104921_FCER2.3291.30.2_COVID_A1_h	rs12973524	0.766297	0.525572	-0.263805	1.7964	0.144834	Not assessed	Not assessed
6055	1.93857e-10	0.575843	1.22511e-10	0.363853	0.0603036	4:8494704:G:C	ENSG00000109625_CPZ.6493.9.3_sun_pQTL	ENSG00000109625_CPZ.6493.9.3_COVID_A1_h	rs2177327	1.12788	0.742952	-0.328277	2.58404	0.128987	Not assessed	Not assessed
6540	1.02615e-89	0.588709	6.11924e-90	0.351007	0.060284	15:80180184:C:T	ENSG00000103876_FAH.11424.4.3_sun_pQTL	ENSG00000103876_FAH.11424.4.3_COVID_A1_h	rs11555096	-0.364497	0.299193	-0.950904	0.221909	0.223121	Not assessed	Not assessed
7373	1.27576e-50	0.622366	6.50694e-51	0.317373	0.0602608	1:180194255:A:G	ENSG00000116260_QSOX1.6217.23.3_sun_pQTL	ENSG00000116260_QSOX1.6217.23.3_COVID_B2_h	rs12371	0.100566	0.0544932	-0.00623861	0.207371	0.0649678	Not assessed	Not assessed
7253	0.279122	0.360054	0.131311	0.169324	0.0601896	22:35514178:A:G	ENSG00000100320_RBFOX2.11462.8.3_sun_pQTL	ENSG00000100320_RBFOX2.11462.8.3_COVID_A2_h	rs76058727	0.592768	0.307658	-0.0102302	1.19577	0.0540155	Not assessed	Not assessed
5632	1.04323e-05	0.623066	5.30426e-06	0.316734	0.0601839	7:134450869:T:C	ENSG00000085662_AKR1B1.9854.36.3_sun_pQTL	ENSG00000085662_AKR1B1.9854.36.3_COVID_A1_h	rs2229542	0.46608	0.62758	-0.763954	1.69612	0.457686	Not assessed	Not assessed
4524	4.07355e-45	0.648542	1.82996e-45	0.291284	0.0601738	1:196713817:G:A	ENSG00000000971_CFH.4159.130.1_sun_pQTL	ENSG00000000971_CFH.4159.130.1_COVID_A1_h	rs2274700	-0.463874	0.391023	-1.23027	0.302517	0.2355	Not assessed	Not assessed
7239	0.00110382	0.663939	0.00045642	0.274473	0.0600276	12:86084541:T:A	ENSG00000182050_MGAT4C.7208.60.3_sun_pQTL	ENSG00000182050_MGAT4C.7208.60.3_COVID_C1_h	rs77936926	0.372084	0.130907	0.11551	0.628657	0.00447829	Not assessed	Not assessed
5961	2.27646e-220	0.595822	1.31514e-220	0.344154	0.060024	13:91770692:G:T	ENSG00000179399_GPC5.4991.12.1_sun_pQTL	ENSG00000179399_GPC5.4991.12.1_COVID_A1_h	rs342702	-0.333847	0.288212	-0.898732	0.231038	0.246725	Not assessed	Not assessed
3466	8.07077e-14	0.694962	2.84668e-14	0.245064	0.059974	7:142800839:T:C	ENSG00000275896_PRSS2.5034.79.1_sun_pQTL	ENSG00000275896_PRSS2.5034.79.1_COVID_A1_h	rs1799886	-0.0615765	0.655006	-1.34537	1.22221	0.925102	Not assessed	Not assessed
7741	0.271819	0.320774	0.159419	0.188071	0.0599173	20:57185101:G:C	ENSG00000087586_AURKA.3091.70.2_sun_pQTL	ENSG00000087586_AURKA.3091.70.2_COVID_D1_h	rs11697702	1.59521	0.402934	0.80547	2.38494	7.52712e-05	Not assessed	Not assessed
6520	0.0383447	0.577835	0.020162	0.303772	0.0598867	9:86101436:A:G	ENSG00000135052_GOLM1.8983.7.3_sun_pQTL	ENSG00000135052_GOLM1.8983.7.3_COVID_B1_h	rs11141236	-0.51421	0.391851	-1.28222	0.253803	0.189432	Not assessed	Not assessed
5940	5.78613e-05	0.596052	3.3399e-05	0.343996	0.0598602	1:42153468:A:G	ENSG00000044012_GUCA2B.6223.5.3_sun_pQTL	ENSG00000044012_GUCA2B.6223.5.3_COVID_A2_h	rs1047047	-0.380356	0.183419	-0.739851	-0.0208602	0.0381078	Not assessed	Not assessed
6190	0.411991	0.226094	0.195155	0.107038	0.0597212	22:38278994:G:C	ENSG00000100083_GGA1.13594.158.3_sun_pQTL	ENSG00000100083_GGA1.13594.158.3_COVID_A2_h	rs62230168	-1.0549	0.333389	-1.70833	-0.401468	0.00155529	Not assessed	Not assessed
5809	5.09887e-08	0.586655	3.07429e-08	0.353656	0.0596885	3:54119490:G:A	ENSG00000157445_CACNA2D3.8885.6.3_sun_pQTL	ENSG00000157445_CACNA2D3.8885.6.3_COVID_A1_h	rs34084772	-1.47007	0.864491	-3.16444	0.224299	0.0890357	Not assessed	Not assessed
5659	9.39193e-14	0.610592	5.07332e-14	0.329769	0.0596392	7:137331551:C:A	ENSG00000105894_PTN.3045.72.2_sun_pQTL	ENSG00000105894_PTN.3045.72.2_COVID_A1_h	rs1431093	-0.776821	0.696812	-2.14255	0.588906	0.264927	Not assessed	Not assessed
7945	2.71196e-28	0.601884	1.52537e-28	0.338477	0.0596389	14:94284149:T:C	ENSG00000140093_SERPINA10.6583.67.3_sun_pQTL	ENSG00000140093_SERPINA10.6583.67.3_COVID_A2_h	rs2232710	-0.130746	0.109422	-0.345209	0.0837165	0.232133	Not assessed	Not assessed
7553	3.32966e-182	0.545061	2.41521e-182	0.395306	0.0596326	5:76913349:C:T	ENSG00000145708_CRHBP.6039.24.3_sun_pQTL	ENSG00000145708_CRHBP.6039.24.3_COVID_B1_h	rs6890905	0.142561	0.0831106	-0.020333	0.305454	0.0862877	Not assessed	Not assessed
4867	1.46691e-05	0.645343	6.70865e-06	0.295076	0.0595594	9:34593088:G:A	ENSG00000122756_CNTFR.14101.2.3_sun_pQTL	ENSG00000122756_CNTFR.14101.2.3_COVID_A1_h	rs10972159	-0.203273	0.710635	-1.59609	1.18955	0.774844	Not assessed	Not assessed
5837	5.72506e-51	0.738132	1.5696e-51	0.202309	0.059559	11:108486410:G:A	ENSG00000178202_KDELC2.8296.117.3_sun_pQTL	ENSG00000178202_KDELC2.8296.117.3_COVID_C2_h	rs74911261	0.0560635	0.0339677	-0.010512	0.122639	0.0988421	Not assessed	Not assessed
8521	3.45316e-19	0.519087	2.80361e-19	0.421385	0.0595285	3:195272938:ACC:A	ENSG00000173950_XXYLT1.6375.75.3_sun_pQTL	ENSG00000173950_XXYLT1.6375.75.3_COVID_B1_h	rs71649592	0.152436	0.20108	-0.241674	0.546546	0.4484	Not assessed	Not assessed
4126	9.94444e-05	0.660934	4.20559e-05	0.279455	0.0594697	10:102705930:G:C	ENSG00000138175_ARL3.12571.14.3_sun_pQTL	ENSG00000138175_ARL3.12571.14.3_COVID_A1_h	rs12765459	-0.464176	0.983714	-2.39222	1.46387	0.637026	Not assessed	Not assessed
7530	1.11125e-08	0.638913	5.24708e-09	0.301621	0.0594661	11:124756673:G:A	ENSG00000149564_ESAM.7841.84.3_sun_pQTL	ENSG00000149564_ESAM.7841.84.3_COVID_B1_h	rs61753651	0.169179	0.226185	-0.274135	0.612492	0.45448	Not assessed	Not assessed
6028	0.325565	0.128553	0.348767	0.137655	0.0594592	3:101674739:C:A	ENSG00000170044_ZPLD1.5590.11.3_sun_pQTL	ENSG00000170044_ZPLD1.5590.11.3_COVID_C2_h	rs7651721	-0.841806	0.210833	-1.25503	-0.42858	6.53104e-05	Not assessed	Not assessed
3427	0.00242532	0.676447	0.000935475	0.260854	0.0593383	17:19385973:G:C	ENSG00000166482_MFAP4.5636.10.3_sun_pQTL	ENSG00000166482_MFAP4.5636.10.3_COVID_A2_h	rs139356332	0.349269	0.303309	-0.245205	0.943744	0.249514	Not assessed	Not assessed
8301	0.0279583	0.486925	0.0231259	0.402703	0.0592872	2:37365901:G:A	ENSG00000115828_QPCT.7849.3.3_sun_pQTL	ENSG00000115828_QPCT.7849.3.3_COVID_B2_h	rs72792854	-0.177149	0.218875	-0.606137	0.251839	0.418308	Not assessed	Not assessed
6309	8.24297e-09	0.587741	4.95122e-09	0.352973	0.0592854	10:125872999:A:G	ENSG00000188690_UROS.11248.43.3_sun_pQTL	ENSG00000188690_UROS.11248.43.3_COVID_A1_h	rs10794029	0.822284	0.787119	-0.720441	2.36501	0.296173	Not assessed	Not assessed
5734	0.0163354	0.0382581	0.265163	0.62096	0.0592832	17:49857934:C:T	ENSG00000108821_COL1A1.11140.56.3_sun_pQTL	ENSG00000108821_COL1A1.11140.56.3_COVID_B2_h	rs9897480	-1.7232	0.342155	-2.39382	-1.05259	4.74539e-07	Not assessed	Not assessed
4728	1.08143e-12	0.667625	4.42455e-13	0.273092	0.059283	1:153552230:G:A	ENSG00000196154_S100A4.14116.129.3_sun_pQTL	ENSG00000196154_S100A4.14116.129.3_COVID_A1_h	rs58056804	-0.212446	0.732798	-1.6487	1.22381	0.771885	Not assessed	Not assessed
4745	4.42841e-05	0.666787	1.81933e-05	0.273877	0.0592737	1:153552230:G:A	ENSG00000197956_S100A6.13090.17.3_sun_pQTL	ENSG00000197956_S100A6.13090.17.3_COVID_A1_h	rs58056804	-0.302739	1.04425	-2.34944	1.74396	0.771885	Not assessed	Not assessed
4073	5.70583e-12	0.663066	2.39097e-12	0.277791	0.0591429	5:131141405:C:A	ENSG00000169567_HINT1.5900.11.2_sun_pQTL	ENSG00000169567_HINT1.5900.11.2_COVID_A1_h	rs112241559	1.44681	0.828777	-0.177564	3.07118	0.0808604	Not assessed	Not assessed
6757	0.00153404	0.640451	0.000714518	0.298247	0.0590537	5:150466168:C:T	ENSG00000070614_NDST1.6927.7.3_sun_pQTL	ENSG00000070614_NDST1.6927.7.3_COVID_A2_h	rs6870546	-0.522442	0.324392	-1.15824	0.113355	0.107283	Not assessed	Not assessed
7201	2.2986e-18	0.61395	1.22468e-18	0.327051	0.0589991	11:123175022:C:T	ENSG00000166250_CLMP.10440.26.3_sun_pQTL	ENSG00000166250_CLMP.10440.26.3_COVID_A2_h	rs35483681	0.303308	0.154944	-0.000376457	0.606992	0.0502847	Not assessed	Not assessed
7524	0	0.614744	0	0.326292	0.0589637	2:160028931:T:C	ENSG00000153246_PLA2R1.10916.44.3_sun_pQTL	ENSG00000153246_PLA2R1.10916.44.3_COVID_B1_h	rs3749117	0.0825984	0.0458707	-0.00730663	0.172503	0.0717539	Not assessed	Not assessed
5976	3.87963e-13	0.652579	1.71537e-13	0.288478	0.0589437	17:68659675:G:A	ENSG00000108950_FAM20A.6433.57.3_sun_pQTL	ENSG00000108950_FAM20A.6433.57.3_COVID_A2_h	rs929477	0.245039	0.137035	-0.0235451	0.513623	0.0737525	Not assessed	Not assessed
5379	1.18471e-17	0.616654	6.23471e-18	0.324463	0.058883	22:23580365:G:A	ENSG00000128322_IGLL1.6485.59.3_sun_pQTL	ENSG00000128322_IGLL1.6485.59.3_COVID_A1_h	rs9624216	-0.541162	0.539407	-1.59838	0.516056	0.315738	Not assessed	Not assessed
6468	3.3226e-16	0.681922	1.26389e-16	0.25934	0.0587377	17:75144846:G:A	ENSG00000125458_NT5C.12560.9.3_sun_pQTL	ENSG00000125458_NT5C.12560.9.3_COVID_D1_h	rs78625720	0.130644	0.121557	-0.107602	0.368891	0.282482	Not assessed	Not assessed
6261	6.81697e-06	0.588057	4.09586e-06	0.353266	0.0586658	13:37544139:C:A	ENSG00000133110_POSTN.6645.53.3_sun_pQTL	ENSG00000133110_POSTN.6645.53.3_COVID_A1_h	rs7981539	1.16255	0.897057	-0.595649	2.92075	0.194989	Not assessed	Not assessed
7070	0.0365328	0.616973	0.0160938	0.271738	0.0586624	1:236067017:G:A	ENSG00000116962_NID1.3213.65.2_sun_pQTL	ENSG00000116962_NID1.3213.65.2_COVID_A2_h	rs76183323	0.37289	0.342356	-0.298116	1.0439	0.276071	Not assessed	Not assessed
6028	9.45828e-11	0.586233	5.73073e-11	0.355137	0.0586302	3:119402832:T:C	ENSG00000163389_POGLUT1.6467.65.3_sun_pQTL	ENSG00000163389_POGLUT1.6467.65.3_COVID_A1_h	rs75203710	-0.878551	0.773062	-2.39373	0.636623	0.255766	Not assessed	Not assessed
6458	0.000823445	0.6803	0.000314745	0.259972	0.0585901	5:148109064:CT:C	ENSG00000133710_SPINK5.8028.22.3_sun_pQTL	ENSG00000133710_SPINK5.8028.22.3_COVID_D1_h	rs113070270	-0.67859	0.285838	-1.23882	-0.118357	0.0175949	Not assessed	Not assessed
5925	0.000720812	0.594268	0.000419764	0.346013	0.0585788	5:148112548:A:G	ENSG00000133710_SPINK5.8028.22.3_sun_pQTL	ENSG00000133710_SPINK5.8028.22.3_COVID_A1_h	rs112721496	-1.35791	1.00827	-3.33408	0.618255	0.178052	Not assessed	Not assessed
7184	1.06711e-07	0.63977	5.03325e-08	0.301701	0.0585284	18:31093950:T:A	ENSG00000134755_DSC2.13126.52.3_sun_pQTL	ENSG00000134755_DSC2.13126.52.3_COVID_B1_h	rs1789063	-0.420445	0.283937	-0.976951	0.136062	0.138669	Not assessed	Not assessed
8657	5.12842e-48	0.507124	4.39314e-48	0.434357	0.0585189	8:6880706:T:A	ENSG00000164825_DEFB1.6629.3.3_sun_pQTL	ENSG00000164825_DEFB1.6629.3.3_COVID_A1_h	rs2738176	0.56861	0.389597	-0.194985	1.33221	0.144432	Not assessed	Not assessed
6230	0.0395422	0.578838	0.0206655	0.302453	0.0585009	8:81412058:A:G	ENSG00000170323_FABP4.9851.9.3_sun_pQTL	ENSG00000170323_FABP4.9851.9.3_COVID_A2_h	rs1597532	-1.16879	0.362535	-1.87935	-0.458238	0.00126437	Not assessed	Not assessed
7355	2.33599e-15	0.535211	1.77368e-15	0.406318	0.0584714	9:27197488:G:T	ENSG00000120156_TEK.3773.15.4_sun_pQTL	ENSG00000120156_TEK.3773.15.4_COVID_A1_h	rs35030851	-0.956917	0.680926	-2.29151	0.377673	0.159927	Not assessed	Not assessed
5525	1.69192e-10	0.612836	9.07731e-11	0.328733	0.0584308	14:49604820:TTTCTGCC:T	ENSG00000168282_MGAT2.6909.40.3_sun_pQTL	ENSG00000168282_MGAT2.6909.40.3_COVID_A1_h	rs147933505	-2.44478	1.02155	-4.44699	-0.442577	0.016702	Not assessed	Not assessed
6260	9.2667e-06	0.588334	5.56449e-06	0.353226	0.0584257	13:37622805:G:T	ENSG00000133110_POSTN.6650.20.3_sun_pQTL	ENSG00000133110_POSTN.6650.20.3_COVID_A1_h	rs9646097	-1.13751	1.16662	-3.42404	1.14903	0.329539	Not assessed	Not assessed
6503	0.000428426	0.634397	0.000207066	0.306557	0.0584105	19:44804951:G:A	ENSG00000187244_BCAM.2816.50.2_sun_pQTL	ENSG00000187244_BCAM.2816.50.2_COVID_B1_h	rs144579705	0.30317	0.297241	-0.279411	0.885752	0.307753	Not assessed	Not assessed
5566	1.10332e-24	0.619838	5.72888e-25	0.321786	0.0583761	3:58666565:G:T	ENSG00000198643_FAM3D.13102.1.3_sun_pQTL	ENSG00000198643_FAM3D.13102.1.3_COVID_A1_h	rs3749290	0.381726	0.447609	-0.495572	1.25902	0.393765	Not assessed	Not assessed
4563	2.08481e-05	0.658159	8.98046e-06	0.283447	0.0583644	4:73998280:T:C	ENSG00000163735_CXCL5.2979.8.2_sun_pQTL	ENSG00000163735_CXCL5.2979.8.2_COVID_A1_h	rs425535	-0.726833	1.04078	-2.76672	1.31306	0.484956	Not assessed	Not assessed
3116	3.57574e-07	0.734565	1.00842e-07	0.207102	0.0583326	1:119811396:C:T	ENSG00000134193_REG4.11102.22.3_sun_pQTL	ENSG00000134193_REG4.11102.22.3_COVID_A1_h	rs2298069	0.325162	0.857835	-1.35616	2.00649	0.704651	Not assessed	Not assessed
3619	0.107577	0.606918	0.0342158	0.192976	0.058313	11:65947454:C:T	ENSG00000175376_EIF1AD.13545.97.3_sun_pQTL	ENSG00000175376_EIF1AD.13545.97.3_COVID_A1_h	rs565921	1.22532	1.60176	-1.91407	4.36472	0.444281	Not assessed	Not assessed
4750	0.000369932	0.640319	0.000173869	0.300893	0.0582437	1:12189248:C:T	ENSG00000028137_TNFRSF1B.3152.57.1_sun_pQTL	ENSG00000028137_TNFRSF1B.3152.57.1_COVID_A1_h	rs5746007	-0.24474	1.14524	-2.48937	1.99989	0.830779	Not assessed	Not assessed
9105	6.06415e-23	0.541189	4.48911e-23	0.400568	0.0582436	10:7658746:A:G	ENSG00000123243_ITIH5.8233.2.3_sun_pQTL	ENSG00000123243_ITIH5.8233.2.3_COVID_A2_h	rs7909223	-0.204457	0.100459	-0.401354	-0.00756017	0.0418287	Not assessed	Not assessed
7892	9.46015e-58	0.542831	6.95368e-58	0.39895	0.0582197	14:94569037:G:A	ENSG00000100665_SERPINA4.14105.5.3_sun_pQTL	ENSG00000100665_SERPINA4.14105.5.3_COVID_A1_h	rs10139745	-0.469583	0.357388	-1.17005	0.230884	0.188869	Not assessed	Not assessed
5933	0.000293444	0.691205	0.000106234	0.250176	0.0582184	5:177324058:G:A	ENSG00000169223_LMAN2.9468.8.3_sun_pQTL	ENSG00000169223_LMAN2.9468.8.3_COVID_B2_h	rs151014368	0.334816	0.172554	-0.00338446	0.673016	0.0523372	Not assessed	Not assessed
6493	5.03191e-08	0.700161	1.73704e-08	0.241641	0.0581978	19:44909976:G:T	ENSG00000130203_APOE.5312.49.3_sun_pQTL	ENSG00000130203_APOE.5312.49.3_COVID_B2_h	rs1065853	0.333951	0.141526	0.0565656	0.611336	0.0182923	Not assessed	Not assessed
5446	3.04376e-06	0.745529	8.01544e-07	0.19627	0.0581977	15:40844687:C:T	ENSG00000104129_DNAJC17.14655.1.3_sun_pQTL	ENSG00000104129_DNAJC17.14655.1.3_COVID_B2_h	rs11549914	-0.103328	0.169504	-0.435549	0.228894	0.542134	Not assessed	Not assessed
6184	8.11847e-33	0.628656	4.04523e-33	0.313185	0.0581591	9:137104241:G:T	ENSG00000176978_DPP7.8346.9.3_sun_pQTL	ENSG00000176978_DPP7.8346.9.3_COVID_B1_h	rs4880207	0.392739	0.164267	0.0707818	0.714696	0.016809	Not assessed	Not assessed
6507	2.26009e-06	0.577538	1.4259e-06	0.364313	0.058146	17:34320812:A:C	ENSG00000108700_CCL8.2785.15.2_sun_pQTL	ENSG00000108700_CCL8.2785.15.2_COVID_A1_h	rs1133763	-1.22612	0.913382	-3.01631	0.564081	0.17947	Not assessed	Not assessed
6551	6.76638e-16	0.560018	4.61501e-16	0.381903	0.0580792	3:126969428:G:A	ENSG00000114554_PLXNA1.9005.16.3_sun_pQTL	ENSG00000114554_PLXNA1.9005.16.3_COVID_A1_h	rs4679317	1.04627	0.63668	-0.2016	2.29414	0.100316	Not assessed	Not assessed
4595	0.192157	0.535708	0.0565418	0.157573	0.0580209	20:33482180:G:A	ENSG00000149600_COMMD7.2823.7.1_sun_pQTL	ENSG00000149600_COMMD7.2823.7.1_COVID_A2_h	rs75399011	0.795819	0.433886	-0.0545817	1.64622	0.0666293	Not assessed	Not assessed
5957	1.45827e-176	0.607141	8.04379e-177	0.33484	0.0580187	6:46864361:T:C	ENSG00000069122_ADGRF5.6409.57.3_sun_pQTL	ENSG00000069122_ADGRF5.6409.57.3_COVID_A1_h	rs628638	-0.246099	0.213259	-0.664079	0.171881	0.248504	Not assessed	Not assessed
9128	3.44606e-63	0.473342	3.41271e-63	0.468703	0.0579552	4:7432729:A:G	ENSG00000178597_PSAPL1.8814.33.3_sun_pQTL	ENSG00000178597_PSAPL1.8814.33.3_COVID_A1_h	rs10023470	-0.5657	0.34574	-1.24334	0.111938	0.101798	Not assessed	Not assessed
6169	0.052454	0.523467	0.0333589	0.332849	0.0578712	4:154621774:G:A	ENSG00000171560_FGA.FGB.FGG.4907.56.1_sun_pQTL	ENSG00000171560_FGA.FGB.FGG.4907.56.1_COVID_A1_h	rs59234924	1.83219	1.18402	-0.48845	4.15283	0.12176	Not assessed	Not assessed
8715	8.65311e-27	0.562157	5.85034e-27	0.380015	0.0578287	21:45510178:G:A	ENSG00000182871_COL18A1.2201.17.6_sun_pQTL	ENSG00000182871_COL18A1.2201.17.6_COVID_B1_h	rs144147445	0.172219	0.138304	-0.0988513	0.44329	0.213049	Not assessed	Not assessed
5586	3.269e-07	0.610052	1.78015e-07	0.332149	0.0577986	17:8058194:CA:C	ENSG00000179593_ALOX15B.12422.143.3_sun_pQTL	ENSG00000179593_ALOX15B.12422.143.3_COVID_A1_h	rs35362199	1.43047	1.02341	-0.575383	3.43632	0.16219	Not assessed	Not assessed
6224	2.90313e-11	0.57528	1.85236e-11	0.367004	0.0577166	17:52136371:G:A	ENSG00000154975_CA10.13666.222.3_sun_pQTL	ENSG00000154975_CA10.13666.222.3_COVID_A1_h	rs117399000	-0.688416	0.637363	-1.93762	0.560793	0.280098	Not assessed	Not assessed
3907	0.326995	0.168053	0.295488	0.151802	0.0576617	12:112568541:C:T	ENSG00000179295_PTPN11.3397.7.4_sun_pQTL	ENSG00000179295_PTPN11.3397.7.4_COVID_D1_h	rs6489849	-0.726464	0.299483	-1.31344	-0.139488	0.0152778	Not assessed	Not assessed
6235	1.8857e-15	0.602067	1.06594e-15	0.340275	0.0576578	1:159566423:C:A	ENSG00000132703_APCS.2474.54.5_sun_pQTL	ENSG00000132703_APCS.2474.54.5_COVID_A1_h	rs71632673	-0.425977	0.5496	-1.50317	0.651219	0.4383	Not assessed	Not assessed
5847	0.00102117	0.694324	0.000362838	0.246648	0.0576442	4:73360328:C:T	ENSG00000081051_AFP.5792.8.2_sun_pQTL	ENSG00000081051_AFP.5792.8.2_COVID_C2_h	rs10008400	-0.243926	0.0978708	-0.435749	-0.0521025	0.012691	Not assessed	Not assessed
4279	0.50825	0.119891	0.2543	0.0599295	0.0576291	17:42932593:A:C	ENSG00000067596_DHX8.11601.26.3_sun_pQTL	ENSG00000067596_DHX8.11601.26.3_COVID_C2_h	rs692609	-0.681329	0.178979	-1.03212	-0.330537	0.0001408	Not assessed	Not assessed
7169	1.56898e-11	0.685367	5.88497e-12	0.257011	0.0576223	13:37582401:C:T	ENSG00000133110_POSTN.6650.20.3_sun_pQTL	ENSG00000133110_POSTN.6650.20.3_COVID_D1_h	rs117103342	0.104918	0.105246	-0.101359	0.311196	0.318818	Not assessed	Not assessed
5439	4.34693e-203	0.710597	1.41837e-203	0.231805	0.0575982	16:72080103:C:T	ENSG00000257017_HP.3054.3.2_sun_pQTL	ENSG00000257017_HP.3054.3.2_COVID_A2_h	rs217181	0.0709298	0.0397521	-0.0069829	0.148843	0.0743745	Not assessed	Not assessed
3783	1.28266e-132	0.649128	5.79618e-133	0.293276	0.0575962	20:35630751:G:C	ENSG00000214078_CPNE1.5346.24.3_sun_pQTL	ENSG00000214078_CPNE1.5346.24.3_COVID_A1_h	rs12481228	-0.170553	0.25	-0.660544	0.319438	0.495106	Not assessed	Not assessed
7094	5.26095e-06	0.56356	3.5372e-06	0.378852	0.0575796	12:47738376:A:T	ENSG00000111405_ENDOU.5656.53.3_sun_pQTL	ENSG00000111405_ENDOU.5656.53.3_COVID_A1_h	rs10875685	-1.1172	0.916304	-2.91312	0.678725	0.222752	Not assessed	Not assessed
9128	0.335836	0.334427	0.136407	0.135778	0.0575518	11:6510794:T:A	ENSG00000166313_APBB1.12822.34.3_sun_pQTL	ENSG00000166313_APBB1.12822.34.3_COVID_C2_h	rs4758108	-0.600175	0.15764	-0.909144	-0.291206	0.000140522	Not assessed	Not assessed
8099	4.65148e-46	0.53139	3.59879e-46	0.411072	0.0575381	3:194367198:T:G	ENSG00000172061_LRRC15.6557.50.3_sun_pQTL	ENSG00000172061_LRRC15.6557.50.3_COVID_A1_h	rs57514363	0.542517	0.402514	-0.246395	1.33143	0.177715	Not assessed	Not assessed
4536	0.000215214	0.629871	0.000106721	0.312285	0.0575219	12:57610139:G:A	ENSG00000240771_ARHGEF25.13519.112.3_sun_pQTL	ENSG00000240771_ARHGEF25.13519.112.3_COVID_A1_h	rs10437954	0.818072	0.913983	-0.973302	2.60945	0.370754	Not assessed	Not assessed
7170	2.11736e-08	0.685443	7.9421e-09	0.257049	0.0575078	13:37582401:C:T	ENSG00000133110_POSTN.6645.53.3_sun_pQTL	ENSG00000133110_POSTN.6645.53.3_COVID_D1_h	rs117103342	0.117514	0.11788	-0.113528	0.348555	0.318818	Not assessed	Not assessed
4950	0.000122779	0.693118	4.41616e-05	0.249245	0.0574696	7:116672385:C:G	ENSG00000105976_MET.2837.3.2_sun_pQTL	ENSG00000105976_MET.2837.3.2_COVID_B1_h	rs1858830	-0.600857	0.411823	-1.40801	0.206301	0.14456	Not assessed	Not assessed
7894	1.73117e-100	0.543356	1.27198e-100	0.399175	0.057469	14:94569037:G:A	ENSG00000100665_SERPINA4.3449.58.2_sun_pQTL	ENSG00000100665_SERPINA4.3449.58.2_COVID_A1_h	rs10139745	-0.369056	0.280879	-0.919569	0.181457	0.188869	Not assessed	Not assessed
7122	0.282943	0.311554	0.165731	0.182432	0.05734	19:48611031:G:T	ENSG00000087076_HSD17B14.13972.4.3_sun_pQTL	ENSG00000087076_HSD17B14.13972.4.3_COVID_A2_h	rs59566152	0.703963	0.275201	0.164579	1.24335	0.0105277	Not assessed	Not assessed
7027	0.077466	0.498986	0.0492384	0.317105	0.0572042	1:158219719:C:T	ENSG00000162706_CADM3.3630.27.4_sun_pQTL	ENSG00000162706_CADM3.3630.27.4_COVID_A1_h	rs1633147	-6.14705	2.32026	-10.6947	-1.59942	0.00806608	Not assessed	Not assessed
5966	2.99215e-16	0.585376	1.82725e-16	0.357421	0.0572031	17:75144846:G:A	ENSG00000125458_NT5C.12560.9.3_sun_pQTL	ENSG00000125458_NT5C.12560.9.3_COVID_A1_h	rs78625720	0.615367	0.875269	-1.10013	2.33086	0.482018	Not assessed	Not assessed
7360	0.00511111	0.700383	0.00171979	0.235608	0.0571779	13:37518320:A:G	ENSG00000133110_POSTN.3457.57.1_sun_pQTL	ENSG00000133110_POSTN.3457.57.1_COVID_C1_h	rs973497	0.319882	0.115312	0.0938747	0.545888	0.00553616	Not assessed	Not assessed
7987	5.1142e-16	0.651945	2.28226e-16	0.290879	0.0571759	14:20965208:A:C	ENSG00000169385_RNASE2.8394.56.3_sun_pQTL	ENSG00000169385_RNASE2.8394.56.3_COVID_B2_h	rs56204594	-0.204886	0.101923	-0.404651	-0.00512032	0.0444099	Not assessed	Not assessed
6723	1.80952e-54	0.581006	1.12714e-54	0.361849	0.0571449	4:55106779:A:G	ENSG00000128052_KDR.3651.50.5_sun_pQTL	ENSG00000128052_KDR.3651.50.5_COVID_A1_h	rs34231037	0.361088	0.379343	-0.38241	1.10459	0.341159	Not assessed	Not assessed
5351	1.36148e-20	0.634639	6.61355e-21	0.308226	0.0571348	11:59864062:C:T	ENSG00000134827_TCN1.11232.46.3_sun_pQTL	ENSG00000134827_TCN1.11232.46.3_COVID_A1_h	rs34528912	-0.051138	0.584203	-1.19616	1.09388	0.930247	Not assessed	Not assessed
7484	6.38807e-19	0.555326	4.45866e-19	0.387542	0.0571318	3:195284693:G:A	ENSG00000173950_XXYLT1.6375.75.3_sun_pQTL	ENSG00000173950_XXYLT1.6375.75.3_COVID_A1_h	rs9810077	0.768196	0.587608	-0.383494	1.91989	0.191101	Not assessed	Not assessed
7771	9.48391e-44	0.544117	6.95217e-44	0.398807	0.0570762	9:136213967:A:AAC	ENSG00000165661_QSOX2.8397.147.3_sun_pQTL	ENSG00000165661_QSOX2.8397.147.3_COVID_B1_h	rs77836657	0.227163	0.127323	-0.0223856	0.476711	0.0743999	Not assessed	Not assessed
7351	0.174085	0.424861	0.100003	0.244004	0.0570483	1:56961277:T:C	ENSG00000157131_C8A.C8B.C8G.2429.27.4_sun_pQTL	ENSG00000157131_C8A.C8B.C8G.2429.27.4_COVID_A2_h	rs12092641	0.487266	0.243117	0.0107659	0.963766	0.0450436	Not assessed	Not assessed
6971	0.103653	0.541501	0.047855	0.249946	0.0570456	1:161940930:T:C	ENSG00000118217_ATF6.11277.23.3_sun_pQTL	ENSG00000118217_ATF6.11277.23.3_COVID_B1_h	rs4233381	0.730463	0.379612	-0.0135624	1.47449	0.0543249	Not assessed	Not assessed
5849	2.45543e-19	0.572631	1.5882e-19	0.370328	0.0570415	20:59220098:G:A	ENSG00000101160_CTSZ.4971.1.1_sun_pQTL	ENSG00000101160_CTSZ.4971.1.1_COVID_A1_h	rs75940688	-0.907622	1.12745	-3.11738	1.30213	0.420806	Not assessed	Not assessed
7258	3.07436e-07	0.583517	1.89427e-07	0.359477	0.0570054	5:38907320:C:T	ENSG00000145623_OSMR.10892.8.3_sun_pQTL	ENSG00000145623_OSMR.10892.8.3_COVID_B2_h	rs357253	-0.263892	0.117563	-0.494312	-0.0334717	0.0247889	Not assessed	Not assessed
6597	1.77936e-48	0.644295	8.2512e-49	0.298713	0.0569919	19:44909976:G:T	ENSG00000130203_APOE.2937.10.2_sun_pQTL	ENSG00000130203_APOE.2937.10.2_COVID_B1_h	rs1065853	0.196467	0.121108	-0.0409016	0.433835	0.104753	Not assessed	Not assessed
6769	0.316724	0.116865	0.372174	0.137268	0.05697	1:159553254:G:C	ENSG00000213085_CFAP45.6553.68.3_sun_pQTL	ENSG00000213085_CFAP45.6553.68.3_COVID_B1_h	rs28625032	2.1266	0.52821	1.09133	3.16187	5.67218e-05	Not assessed	Not assessed
5788	5.81205e-20	0.607112	3.21639e-20	0.335919	0.056969	4:109967851:A:C	ENSG00000138798_EGF.5509.7.3_sun_pQTL	ENSG00000138798_EGF.5509.7.3_COVID_A1_h	rs11568972	-0.702901	0.587905	-1.85517	0.449371	0.231851	Not assessed	Not assessed
6379	4.56507e-55	0.593461	2.68947e-55	0.349576	0.0569635	2:102000742:T:C	ENSG00000115590_IL1R2.14133.93.3_sun_pQTL	ENSG00000115590_IL1R2.14133.93.3_COVID_B1_h	rs7561460	-0.180425	0.0975205	-0.371562	0.0107118	0.0642959	Not assessed	Not assessed
4560	2.41615e-34	0.740622	6.60915e-35	0.202533	0.0568451	17:36064257:A:G	ENSG00000276085_CCL3L1.2783.18.2_sun_pQTL	ENSG00000276085_CCL3L1.2783.18.2_COVID_D1_h	rs2015086	0.131895	0.07725	-0.0195121	0.283302	0.0877513	Not assessed	Not assessed
5504	5.48973e-175	0.688202	2.03424e-175	0.254959	0.0568394	1:8974539:A:G	ENSG00000131686_CA6.3352.80.3_sun_pQTL	ENSG00000131686_CA6.3352.80.3_COVID_D1_h	rs3765963	-0.0770751	0.0400754	-0.155621	0.00147121	0.0544483	Not assessed	Not assessed
6692	8.68303e-16	0.667189	3.59241e-16	0.275977	0.0568341	6:36130414:C:A	ENSG00000156711_MAPK13.5006.71.1_sun_pQTL	ENSG00000156711_MAPK13.5006.71.1_COVID_A2_h	rs12210904	-0.329511	0.168026	-0.658836	-0.000186509	0.0498704	Not assessed	Not assessed
6811	1.92184e-18	0.532986	1.47943e-18	0.410235	0.056779	1:54631433:A:G	ENSG00000162391_FAM151A.7856.51.3_sun_pQTL	ENSG00000162391_FAM151A.7856.51.3_COVID_A1_h	rs11206398	0.758812	0.565356	-0.349264	1.86689	0.179536	Not assessed	Not assessed
6617	8.19011e-34	0.570033	5.36274e-34	0.373191	0.0567761	12:7102090:G:C	ENSG00000139178_C1RL.9348.1.3_sun_pQTL	ENSG00000139178_C1RL.9348.1.3_COVID_B1_h	rs191448232	-0.157092	0.142908	-0.437186	0.123002	0.271657	Not assessed	Not assessed
6677	3.22825e-16	0.656195	1.4125e-16	0.287057	0.0567484	17:75144846:G:A	ENSG00000125458_NT5C.12560.9.3_sun_pQTL	ENSG00000125458_NT5C.12560.9.3_COVID_B1_h	rs78625720	0.218422	0.196361	-0.166438	0.603282	0.265987	Not assessed	Not assessed
4292	8.56091e-305	0.632928	4.1987e-305	0.310363	0.056709	17:36001998:T:G	ENSG00000275718_CCL15.3509.1.1_sun_pQTL	ENSG00000275718_CCL15.3509.1.1_COVID_A1_h	rs41508645	-0.131523	0.176464	-0.477386	0.214341	0.456077	Not assessed	Not assessed
4294	0	0.63289	0	0.310405	0.0567055	17:36001998:T:G	ENSG00000275718_CCL15.14109.15.3_sun_pQTL	ENSG00000275718_CCL15.14109.15.3_COVID_A1_h	rs41508645	-0.123759	0.166047	-0.449205	0.201688	0.456077	Not assessed	Not assessed
6150	1.58297e-40	0.59067	9.45367e-41	0.352698	0.0566322	6:36871822:C:G	ENSG00000137168_PPIL1.9884.8.3_sun_pQTL	ENSG00000137168_PPIL1.9884.8.3_COVID_A1_h	rs12194408	-0.217875	0.562676	-1.3207	0.88495	0.698599	Not assessed	Not assessed
6272	0.000481879	0.716748	0.000151987	0.226009	0.05661	19:44804951:G:A	ENSG00000187244_BCAM.2816.50.2_sun_pQTL	ENSG00000187244_BCAM.2816.50.2_COVID_D1_h	rs144579705	0.11213	0.177135	-0.235047	0.459307	0.526719	Not assessed	Not assessed
7813	3.74851e-22	0.54575	2.73161e-22	0.397642	0.0566085	14:94530397:GT:G	ENSG00000165953_SERPINA12.6551.94.3_sun_pQTL	ENSG00000165953_SERPINA12.6551.94.3_COVID_A1_h	rs34825443	1.13853	0.703692	-0.240682	2.51774	0.105676	Not assessed	Not assessed
16816	1.37917e-08	1.86604e-08	0.400959	0.542448	0.0565924	6:31153455:T:C	ENSG00000226979_LTA.LTB.3506.49.1_sun_pQTL	ENSG00000226979_LTA.LTB.3506.49.1_COVID_A2_h	rs111837807	-3.77411	0.5053	-4.76448	-2.78374	8.07757e-14	Not assessed	Not assessed
7474	8.55017e-05	0.525647	6.79392e-05	0.417619	0.0565804	10:70888665:G:T	ENSG00000166228_PCBD1.11313.100.3_sun_pQTL	ENSG00000166228_PCBD1.11313.100.3_COVID_A1_h	rs2630336	-1.16729	0.975655	-3.07954	0.744959	0.231534	Not assessed	Not assessed
8087	0.00138129	0.538725	0.00103162	0.402291	0.056571	16:57379748:C:T	ENSG00000006210_CX3CL1.2827.23.2_sun_pQTL	ENSG00000006210_CX3CL1.2827.23.2_COVID_B1_h	rs62037084	-0.505169	0.308066	-1.10897	0.0986288	0.101045	Not assessed	Not assessed
5629	0.00128543	0.74425	0.000341379	0.197598	0.056526	8:98033638:G:A	ENSG00000132561_MATN2.3325.2.2_sun_pQTL	ENSG00000132561_MATN2.3325.2.2_COVID_B2_h	rs17831160	-0.216013	0.146312	-0.50278	0.0707539	0.139841	Not assessed	Not assessed
4685	6.78531e-82	0.735841	1.91554e-82	0.207676	0.0564824	17:36064257:A:G	ENSG00000277632_CCL3.3040.59.1_sun_pQTL	ENSG00000277632_CCL3.3040.59.1_COVID_D1_h	rs2015086	0.0908611	0.0532167	-0.0134416	0.195164	0.0877513	Not assessed	Not assessed
5945	3.84749e-56	0.591891	2.28683e-56	0.351745	0.0563639	1:22617716:G:A	ENSG00000159189_C1QC.14100.63.3_sun_pQTL	ENSG00000159189_C1QC.14100.63.3_COVID_A1_h	rs78865058	-0.291557	0.354659	-0.986675	0.403562	0.411033	Not assessed	Not assessed
4519	3.98097e-05	0.67259	1.60441e-05	0.27101	0.0563443	9:97140242:T:A	ENSG00000136943_CTSV.3364.76.2_sun_pQTL	ENSG00000136943_CTSV.3364.76.2_COVID_A1_h	rs10817163	0.786384	0.885224	-0.948624	2.52139	0.374355	Not assessed	Not assessed
7728	2.80436e-12	0.332105	5.1646e-12	0.61156	0.0563353	5:39345204:G:T	ENSG00000113600_C9.3060.43.2_sun_pQTL	ENSG00000113600_C9.3060.43.2_COVID_C2_h	rs62358364	-0.156211	0.0798437	-0.312702	0.000279372	0.0504104	Not assessed	Not assessed
4241	1.29095e-06	0.635138	6.27305e-07	0.308574	0.0562858	17:35864402:T:C	ENSG00000271503_CCL5.5480.49.3_sun_pQTL	ENSG00000271503_CCL5.5480.49.3_COVID_A1_h	rs2291299	0.866745	0.899953	-0.89713	2.63062	0.335497	Not assessed	Not assessed
4290	2.61186e-75	0.633454	1.27954e-75	0.31027	0.056276	17:35985545:G:A	ENSG00000274736_CCL23.2913.1.2_sun_pQTL	ENSG00000274736_CCL23.2913.1.2_COVID_A1_h	rs72830000	-0.174168	0.324503	-0.810181	0.461846	0.591459	Not assessed	Not assessed
5592	2.40831e-33	0.614653	1.28959e-33	0.329074	0.0562727	19:11587844:C:G	ENSG00000102575_ACP5.3232.28.2_sun_pQTL	ENSG00000102575_ACP5.3232.28.2_COVID_A1_h	rs79061565	-0.358535	0.445903	-1.23249	0.515419	0.42136	Not assessed	Not assessed
6587	0	0.563327	0	0.380409	0.0562645	1:19979653:G:C	ENSG00000188257_PLA2G2A.2692.74.2_sun_pQTL	ENSG00000188257_PLA2G2A.2692.74.2_COVID_A1_h	rs11573156	-0.207673	0.171142	-0.543104	0.127759	0.224956	Not assessed	Not assessed
5115	1.37482e-16	0.642177	6.45721e-17	0.301559	0.0562635	10:116206578:C:G	ENSG00000151892_GFRA1.3314.74.2_sun_pQTL	ENSG00000151892_GFRA1.3314.74.2_COVID_A1_h	rs10885877	-0.563516	0.582042	-1.7043	0.577264	0.332959	Not assessed	Not assessed
5789	0.0219599	0.582646	0.01232	0.326823	0.0562504	12:6333477:C:T	ENSG00000067182_TNFRSF1A.2654.19.1_sun_pQTL	ENSG00000067182_TNFRSF1A.2654.19.1_COVID_A1_h	rs4149584	0.433508	1.32336	-2.16023	3.02725	0.743228	Not assessed	Not assessed
6718	6.12329e-13	0.702436	2.10409e-13	0.241316	0.0562477	5:180630293:T:C	ENSG00000037280_FLT4.2358.19.2_sun_pQTL	ENSG00000037280_FLT4.2358.19.2_COVID_B2_h	rs34221241	-0.203873	0.122355	-0.443685	0.0359388	0.0956658	Not assessed	Not assessed
6840	3.20267e-10	0.560915	2.18647e-10	0.382882	0.0562029	17:4714806:A:T	ENSG00000161921_CXCL16.2436.49.4_sun_pQTL	ENSG00000161921_CXCL16.2436.49.4_COVID_A1_h	rs144830084	-0.785434	0.876659	-2.50365	0.932786	0.370285	Not assessed	Not assessed
5478	0.0355796	0.5808	0.0189038	0.308529	0.056187	1:9967482:G:A	ENSG00000162444_RBP7.14208.3.3_sun_pQTL	ENSG00000162444_RBP7.14208.3.3_COVID_A1_h	rs2890358	1.03675	1.21855	-1.35157	3.42507	0.394878	Not assessed	Not assessed
5721	0.00113157	0.60042	0.000643937	0.341621	0.0561841	12:101651861:T:C	ENSG00000196091_MYBPC1.7648.9.3_sun_pQTL	ENSG00000196091_MYBPC1.7648.9.3_COVID_A1_h	rs59931471	-1.05489	1.02043	-3.05489	0.945107	0.301241	Not assessed	Not assessed
7054	0.25798	0.191958	0.283241	0.210698	0.0561229	8:78641052:A:T	ENSG00000104432_IL7.14049.17.3_sun_pQTL	ENSG00000104432_IL7.14049.17.3_COVID_C2_h	rs62517724	-1.02759	0.235847	-1.48984	-0.565339	1.31842e-05	Not assessed	Not assessed
6679	1.8209e-12	0.583075	1.12697e-12	0.360813	0.056112	14:85340430:A:C	ENSG00000185070_FLRT2.13122.19.3_sun_pQTL	ENSG00000185070_FLRT2.13122.19.3_COVID_A1_h	rs17796777	-0.799915	0.690098	-2.15248	0.552652	0.246402	Not assessed	Not assessed
8346	0	0.518026	0	0.425864	0.0561102	3:98790861:G:A	ENSG00000064225_ST3GAL6.6947.4.3_sun_pQTL	ENSG00000064225_ST3GAL6.6947.4.3_COVID_B1_h	rs72934623	-0.0750532	0.0456277	-0.164482	0.0143753	0.0999891	Not assessed	Not assessed
6715	0	0.547435	0	0.396459	0.056106	2:160028931:T:C	ENSG00000153246_PLA2R1.10916.44.3_sun_pQTL	ENSG00000153246_PLA2R1.10916.44.3_COVID_A1_h	rs3749117	0.212271	0.163463	-0.10811	0.532653	0.194085	Not assessed	Not assessed
5796	6.51232e-154	0.678718	2.54498e-154	0.265183	0.0560993	19:43174936:A:G	ENSG00000221826_PSG3.6444.15.3_sun_pQTL	ENSG00000221826_PSG3.6444.15.3_COVID_B1_h	rs2355433	-0.118338	0.0717891	-0.259042	0.0223658	0.0992674	Not assessed	Not assessed
3951	1.18773e-06	0.663316	5.02522e-07	0.280589	0.0560937	11:67585218:A:G	ENSG00000084207_GSTP1.4911.49.2_sun_pQTL	ENSG00000084207_GSTP1.4911.49.2_COVID_A1_h	rs1695	-0.871533	0.924537	-2.68359	0.940526	0.34585	Not assessed	Not assessed
8365	1.08289e-08	0.689833	3.99005e-09	0.254121	0.0560461	17:81231621:G:A	ENSG00000167302_ENTHD2.7947.19.3_sun_pQTL	ENSG00000167302_ENTHD2.7947.19.3_COVID_C1_h	rs61745945	0.113161	0.0788823	-0.041445	0.267768	0.151412	Not assessed	Not assessed
5717	1.60755e-48	0.594231	9.46381e-49	0.349773	0.0559957	19:44909976:G:T	ENSG00000130203_APOE.2937.10.2_sun_pQTL	ENSG00000130203_APOE.2937.10.2_COVID_A1_h	rs1065853	0.652515	0.591659	-0.507115	1.81214	0.270089	Not assessed	Not assessed
6339	4.59297e-98	0.582133	2.85576e-98	0.361896	0.0559714	4:24800212:C:G	ENSG00000109610_SOD3.8463.2.3_sun_pQTL	ENSG00000109610_SOD3.8463.2.3_COVID_A1_h	rs1799895	-0.0829355	0.291103	-0.653487	0.487616	0.77572	Not assessed	Not assessed
5189	0.0144791	0.603605	0.00763703	0.318316	0.0559632	8:35253275:G:A	ENSG00000156687_UNC5D.8624.16.3_sun_pQTL	ENSG00000156687_UNC5D.8624.16.3_COVID_A1_h	rs34376566	1.5949	1.30009	-0.953227	4.14302	0.219912	Not assessed	Not assessed
6605	0.000926106	0.651444	0.000414135	0.291256	0.0559601	1:204179521:G:A	ENSG00000143839_REN.3396.54.2_sun_pQTL	ENSG00000143839_REN.3396.54.2_COVID_B1_h	rs193280350	0.104354	0.230661	-0.347734	0.556442	0.650972	Not assessed	Not assessed
5899	2.11451e-15	0.609631	1.16019e-15	0.334436	0.0559327	22:20422683:AACC:A	ENSG00000244486_SCARF2.8956.96.3_sun_pQTL	ENSG00000244486_SCARF2.8956.96.3_COVID_A2_h	rs10606665	0.336417	0.17398	-0.00457816	0.677413	0.0531562	Not assessed	Not assessed
5558	2.84983e-14	0.610039	1.56079e-14	0.33405	0.0559116	20:41361737:G:C	ENSG00000183798_EMILIN3.8773.172.3_sun_pQTL	ENSG00000183798_EMILIN3.8773.172.3_COVID_A1_h	rs61739314	-0.0292939	0.667936	-1.33842	1.27984	0.965018	Not assessed	Not assessed
4816	2.22481e-19	0.649932	1.00714e-19	0.29416	0.0559082	9:34656482:G:A	ENSG00000137070_IL11RA.3814.63.1_sun_pQTL	ENSG00000137070_IL11RA.3814.63.1_COVID_A1_h	rs11575578	-0.104681	0.652004	-1.38259	1.17322	0.872446	Not assessed	Not assessed
7484	0.0516198	0.460418	0.0435659	0.388526	0.0558699	19:6669923:G:A	ENSG00000125735_TNFSF14.5355.69.3_sun_pQTL	ENSG00000125735_TNFSF14.5355.69.3_COVID_A1_h	rs2291668	1.58818	1.09831	-0.564473	3.74083	0.148172	Not assessed	Not assessed
4286	0	0.633765	0	0.310367	0.0558681	17:35980421:T:C	ENSG00000275152_CCL16.4913.78.1_sun_pQTL	ENSG00000275152_CCL16.4913.78.1_COVID_A1_h	rs112689088	-0.128193	0.17634	-0.473812	0.217427	0.467247	Not assessed	Not assessed
7277	1.37711e-11	0.606563	7.6654e-12	0.337575	0.0558614	13:37582401:C:T	ENSG00000133110_POSTN.6650.20.3_sun_pQTL	ENSG00000133110_POSTN.6650.20.3_COVID_B1_h	rs117103342	-0.16131	0.191988	-0.537599	0.21498	0.400792	Not assessed	Not assessed
6604	0.318202	0.351416	0.130479	0.144043	0.0558603	9:33785247:G:A	ENSG00000010438_PRSS3.3479.71.2_sun_pQTL	ENSG00000010438_PRSS3.3479.71.2_COVID_A2_h	rs13288276	1.31838	0.461066	0.414712	2.22206	0.00424405	Not assessed	Not assessed
7279	1.86074e-08	0.606313	1.03701e-08	0.337847	0.0558407	13:37582401:C:T	ENSG00000133110_POSTN.6645.53.3_sun_pQTL	ENSG00000133110_POSTN.6645.53.3_COVID_B1_h	rs117103342	-0.180675	0.215036	-0.602139	0.240788	0.400792	Not assessed	Not assessed
6924	0.00816785	0.54491	0.00577648	0.385316	0.0558297	8:23777367:T:C	ENSG00000159167_STC1.4930.21.1_sun_pQTL	ENSG00000159167_STC1.4930.21.1_COVID_A1_h	rs310274	-1.43044	1.13184	-3.64881	0.787926	0.206295	Not assessed	Not assessed
6153	3.7943e-05	0.691609	1.38581e-05	0.252543	0.055796	1:109736980:T:G	ENSG00000134184_GSTM1.7239.9.3_sun_pQTL	ENSG00000134184_GSTM1.7239.9.3_COVID_C2_h	rs2234696	-0.160706	0.0734308	-0.304628	-0.0167847	0.0286301	Not assessed	Not assessed
5994	8.61405e-120	0.577799	5.46413e-120	0.366458	0.0557438	5:148223615:A:G	ENSG00000178172_SPINK6.5731.1.3_sun_pQTL	ENSG00000178172_SPINK6.5731.1.3_COVID_A1_h	rs1432688	0.186662	0.25302	-0.309248	0.682573	0.460674	Not assessed	Not assessed
5414	1.0704e-07	0.596079	6.2538e-08	0.348202	0.0557189	1:175599911:A:G	ENSG00000116147_TNR.11302.237.3_sun_pQTL	ENSG00000116147_TNR.11302.237.3_COVID_A1_h	rs2235256	-0.764492	0.835187	-2.40143	0.872445	0.360006	Not assessed	Not assessed
4641	1.57425e-22	0.62403	8.08139e-23	0.32029	0.0556806	17:58281068:C:T	ENSG00000005381_MPO.2580.83.2_sun_pQTL	ENSG00000005381_MPO.2580.83.2_COVID_A1_h	rs34097845	-0.12501	0.676831	-1.45157	1.20155	0.853465	Not assessed	Not assessed
4930	3.08827e-29	0.642928	1.44803e-29	0.301402	0.0556703	1:43975097:G:C	ENSG00000117411_B4GALT2.9595.11.3_sun_pQTL	ENSG00000117411_B4GALT2.9595.11.3_COVID_A1_h	rs2286241	-0.0797637	0.507459	-1.07437	0.914838	0.875101	Not assessed	Not assessed
6474	0.0427245	0.548437	0.0255302	0.327665	0.0556427	14:52818837:G:A	ENSG00000100522_GNPNAT1.13954.9.3_sun_pQTL	ENSG00000100522_GNPNAT1.13954.9.3_COVID_A1_h	rs2182210	-2.32085	1.36773	-5.00156	0.359861	0.0897238	Not assessed	Not assessed
5799	0	0.685653	0	0.258719	0.0556283	1:203181771:C:G	ENSG00000133048_CHI3L1.11104.13.3_sun_pQTL	ENSG00000133048_CHI3L1.11104.13.3_COVID_D1_h	rs35405821	-0.0494391	0.025646	-0.0997043	0.000826062	0.0538858	Not assessed	Not assessed
6002	0.0782268	0.607016	0.0295892	0.229548	0.0556199	1:174774607:C:T	ENSG00000116161_CACYBP.12432.23.3_sun_pQTL	ENSG00000116161_CACYBP.12432.23.3_COVID_A2_h	rs113664961	-0.339299	0.191582	-0.714793	0.0361942	0.0765539	Not assessed	Not assessed
6348	2.37301e-10	0.598253	1.37323e-10	0.346146	0.0556012	8:61627575:G:T	ENSG00000198363_ASPH.6998.106.3_sun_pQTL	ENSG00000198363_ASPH.6998.106.3_COVID_A1_h	rs112760834	0.582175	0.838053	-1.06038	2.22473	0.487259	Not assessed	Not assessed
7092	4.69212e-27	0.550699	3.35494e-27	0.393702	0.0555985	9:133214142:T:C	ENSG00000171102_OBP2B.5680.54.3_sun_pQTL	ENSG00000171102_OBP2B.5680.54.3_COVID_A1_h	rs4454354	-0.548408	0.438268	-1.4074	0.310582	0.210823	Not assessed	Not assessed
5791	1.40439e-17	0.609665	7.71241e-18	0.334751	0.0555843	1:63631761:C:T	ENSG00000079739_PGM1.9173.21.3_sun_pQTL	ENSG00000079739_PGM1.9173.21.3_COVID_A1_h	rs1126728	-1.0016	0.597037	-2.17177	0.168568	0.0934208	Not assessed	Not assessed
7580	5.53534e-223	0.563182	3.74795e-223	0.381271	0.0555472	15:78942615:G:A	ENSG00000103811_CTSH.8465.52.3_sun_pQTL	ENSG00000103811_CTSH.8465.52.3_COVID_B1_h	rs34593439	-0.0990235	0.0641386	-0.224733	0.0266859	0.122613	Not assessed	Not assessed
6791	9.56645e-81	0.582814	5.93696e-81	0.36164	0.0555459	12:69338325:T:C	ENSG00000090382_LYZ.4920.10.1_sun_pQTL	ENSG00000090382_LYZ.4920.10.1_COVID_A1_h	rs4761234	-0.378606	0.313875	-0.993791	0.236578	0.227729	Not assessed	Not assessed
19267	0.0222321	0.334997	0.0365503	0.55069	0.0555315	6:31236538:T:C	ENSG00000232810_TNF.5936.53.3_sun_pQTL	ENSG00000232810_TNF.5936.53.3_COVID_B1_h	rs9264098	-0.946075	0.346152	-1.62452	-0.26763	0.00627372	Not assessed	Not assessed
6510	9.14025e-43	0.596206	5.3409e-43	0.348324	0.0554699	20:58997654:A:G	ENSG00000101160_CTSZ.4971.1.1_sun_pQTL	ENSG00000101160_CTSZ.4971.1.1_COVID_D1_h	rs199825459	-0.0900649	0.0828893	-0.252525	0.0723951	0.277228	Not assessed	Not assessed
6945	0.0467195	0.0198112	0.616598	0.261411	0.0554611	1:114281376:C:G	ENSG00000009307_CSDE1.12735.39.3_sun_pQTL	ENSG00000009307_CSDE1.12735.39.3_COVID_C2_h	rs7535387	-3.39178	0.633072	-4.63257	-2.15098	8.43116e-08	Not assessed	Not assessed
6015	9.39931e-05	0.576825	5.99096e-05	0.367603	0.0554181	3:186575346:C:T	ENSG00000090520_DNAJB11.7110.2.3_sun_pQTL	ENSG00000090520_DNAJB11.7110.2.3_COVID_A1_h	rs9841006	-0.975406	1.0706	-3.07375	1.12294	0.362253	Not assessed	Not assessed
6098	6.59139e-05	0.732257	1.91156e-05	0.212306	0.0553528	1:42153468:A:G	ENSG00000044012_GUCA2B.6223.5.3_sun_pQTL	ENSG00000044012_GUCA2B.6223.5.3_COVID_C2_h	rs1047047	-0.187871	0.0814321	-0.347475	-0.0282675	0.0210496	Not assessed	Not assessed
5741	2.40622e-54	0.753516	6.10535e-55	0.191136	0.0553471	20:38340105:T:C	ENSG00000101425_BPI.4126.22.1_sun_pQTL	ENSG00000101425_BPI.4126.22.1_COVID_C1_h	rs77603326	0.0713212	0.0366614	-0.00053393	0.143176	0.0517268	Not assessed	Not assessed
6499	0.00126937	0.000502746	0.675429	0.267455	0.0553443	19:10355447:C:T	ENSG00000105397_TYK2.5260.80.3_sun_pQTL	ENSG00000105397_TYK2.5260.80.3_COVID_A2_h	rs11085727	3.68152	0.620062	2.46622	4.89682	2.89675e-09	Not assessed	Not assessed
6226	8.74866e-14	0.681684	3.37614e-14	0.263009	0.0553065	9:98998959:G:T	ENSG00000204291_COL15A1.8974.172.3_sun_pQTL	ENSG00000204291_COL15A1.8974.172.3_COVID_A2_h	rs1413299	-0.265082	0.121625	-0.503463	-0.0267021	0.0292939	Not assessed	Not assessed
5341	1.02589e-17	0.615354	5.49166e-18	0.32935	0.0552962	11:74703874:C:T	ENSG00000054938_CHRDL2.6086.15.3_sun_pQTL	ENSG00000054938_CHRDL2.6086.15.3_COVID_A1_h	rs11607100	-0.130379	0.623041	-1.35152	1.09076	0.834244	Not assessed	Not assessed
6669	1.77632e-96	0.708635	5.91966e-97	0.236101	0.0552645	4:87541577:G:A	ENSG00000152583_SPARCL1.4467.49.2_sun_pQTL	ENSG00000152583_SPARCL1.4467.49.2_COVID_B2_h	rs7681694	0.0809445	0.0403405	0.00187848	0.160011	0.0447998	Not assessed	Not assessed
5377	4.07772e-05	0.587897	2.47502e-05	0.356775	0.0552619	2:174215028:C:T	ENSG00000138430_OLA1.12659.13.3_sun_pQTL	ENSG00000138430_OLA1.12659.13.3_COVID_A1_h	rs145495932	-0.881037	0.965735	-2.77384	1.01177	0.361612	Not assessed	Not assessed
8165	1.38647e-11	0.636908	6.70311e-12	0.307868	0.0552234	6:7883235:C:T	ENSG00000239264_TXNDC5.11212.7.3_sun_pQTL	ENSG00000239264_TXNDC5.11212.7.3_COVID_D1_h	rs111331197	0.111642	0.09826	-0.080944	0.304228	0.255877	Not assessed	Not assessed
7830	2.02254e-15	0.606614	1.12785e-15	0.338218	0.055168	16:57360481:T:C	ENSG00000102962_CCL22.3508.78.3_sun_pQTL	ENSG00000102962_CCL22.3508.78.3_COVID_A2_h	rs41398344	-0.160389	0.190551	-0.533862	0.213085	0.39995	Not assessed	Not assessed
4647	0.00173675	0.638536	0.000826284	0.303738	0.0551633	7:66824053:C:T	ENSG00000126522_ASL.11241.8.3_sun_pQTL	ENSG00000126522_ASL.11241.8.3_COVID_A1_h	rs6460315	0.27666	1.16852	-2.01359	2.56691	0.812842	Not assessed	Not assessed
5752	2.26264e-05	0.609716	1.244e-05	0.335168	0.0550806	17:7608618:A:G	ENSG00000141504_SAT2.12524.18.3_sun_pQTL	ENSG00000141504_SAT2.12524.18.3_COVID_A1_h	rs11078700	-0.59558	1.33638	-3.21484	2.02368	0.655839	Not assessed	Not assessed
6807	2.81764e-76	0.551718	2.00847e-76	0.393221	0.0550607	6:41198413:A:G	ENSG00000112195_TREML2.5736.1.3_sun_pQTL	ENSG00000112195_TREML2.5736.1.3_COVID_A1_h	rs61998254	0.421813	0.377537	-0.318146	1.16177	0.263876	Not assessed	Not assessed
7873	6.24786e-21	0.61274	3.38806e-21	0.332218	0.0550422	16:4469438:G:A	ENSG00000153406_NMRAL1.13988.67.3_sun_pQTL	ENSG00000153406_NMRAL1.13988.67.3_COVID_A2_h	rs11557236	-0.212681	0.141458	-0.489933	0.0645711	0.132711	Not assessed	Not assessed
6126	1.18605e-11	0.555099	8.33138e-12	0.389873	0.0550284	1:67242007:G:A	ENSG00000162594_IL23R.5088.175.3_sun_pQTL	ENSG00000162594_IL23R.5088.175.3_COVID_A1_h	rs11581607	0.755786	0.721476	-0.658282	2.16985	0.294844	Not assessed	Not assessed
7105	0.0129643	0.550478	0.00878186	0.372832	0.0549434	19:50866331:C:G	ENSG00000142515_KLK3.8468.19.3_sun_pQTL	ENSG00000142515_KLK3.8468.19.3_COVID_A1_h	rs2569737	1.51434	1.16462	-0.768274	3.79696	0.193502	Not assessed	Not assessed
7112	0.191795	0.140901	0.353056	0.259316	0.0549322	19:35739969:A:G	ENSG00000161249_DMKN.8535.102.3_sun_pQTL	ENSG00000161249_DMKN.8535.102.3_COVID_C1_h	rs144495330	1.67101	0.356	0.973264	2.36876	2.68108e-06	Not assessed	Not assessed
7249	6.62307e-28	0.561725	4.5205e-28	0.383344	0.0549316	19:51031874:A:G	ENSG00000186474_KLK12.3199.54.2_sun_pQTL	ENSG00000186474_KLK12.3199.54.2_COVID_A1_h	rs3745540	-0.650581	0.532879	-1.69501	0.393843	0.222132	Not assessed	Not assessed
6156	5.90456e-07	0.585226	3.63123e-07	0.359852	0.0549206	20:63715839:G:T	ENSG00000243509_TNFRSF6B.5070.76.3_sun_pQTL	ENSG00000243509_TNFRSF6B.5070.76.3_COVID_A1_h	rs62217799	-2.2766	1.37093	-4.96358	0.410382	0.09679	Not assessed	Not assessed
7243	1.80441e-167	0.561798	1.23122e-167	0.383283	0.0549185	19:51024108:G:A	ENSG00000167757_KLK11.2831.29.1_sun_pQTL	ENSG00000167757_KLK11.2831.29.1_COVID_A1_h	rs1048328	0.248702	0.240421	-0.222514	0.719918	0.300928	Not assessed	Not assessed
6248	0.00636175	0.508247	0.00532243	0.425159	0.0549094	13:77000848:A:G	ENSG00000102805_CLN5.8874.53.3_sun_pQTL	ENSG00000102805_CLN5.8874.53.3_COVID_A1_h	rs1800209	0.80023	1.00031	-1.16034	2.7608	0.42372	Not assessed	Not assessed
5999	0.080966	0.629926	0.0266834	0.207545	0.0548795	1:174774607:C:T	ENSG00000116161_CACYBP.12432.23.3_sun_pQTL	ENSG00000116161_CACYBP.12432.23.3_COVID_B2_h	rs113664961	-0.187193	0.163833	-0.5083	0.133913	0.25321	Not assessed	Not assessed
7091	5.53806e-65	0.51227	4.68012e-65	0.432855	0.0548746	12:94220122:G:A	ENSG00000136040_PLXNC1.4564.2.2_sun_pQTL	ENSG00000136040_PLXNC1.4564.2.2_COVID_A1_h	rs115651556	0.417588	0.270378	-0.112344	0.947519	0.122478	Not assessed	Not assessed
5555	0.399346	0.2062	0.223986	0.115599	0.0548685	1:51910010:A:G	ENSG00000117862_TXNDC12.4815.25.3_sun_pQTL	ENSG00000117862_TXNDC12.4815.25.3_COVID_C1_h	rs61780720	0.51038	0.154807	0.206964	0.813795	0.000977639	Not assessed	Not assessed
7581	0.0342988	0.652725	0.0128906	0.24526	0.054826	3:195572021:T:C	ENSG00000189058_APOD.8262.20.3_sun_pQTL	ENSG00000189058_APOD.8262.20.3_COVID_D1_h	rs139828053	-0.303789	0.210979	-0.717301	0.109723	0.149895	Not assessed	Not assessed
7425	2.52527e-28	0.559963	1.73751e-28	0.385228	0.0548097	14:94284149:T:C	ENSG00000140093_SERPINA10.6583.67.3_sun_pQTL	ENSG00000140093_SERPINA10.6583.67.3_COVID_A1_h	rs2232710	-0.226734	0.529503	-1.26454	0.811072	0.668505	Not assessed	Not assessed
6889	1.29629e-107	0.689183	4.81672e-108	0.256031	0.0547859	12:27774948:T:C	ENSG00000205693_MANSC4.9578.263.3_sun_pQTL	ENSG00000205693_MANSC4.9578.263.3_COVID_A2_h	rs36138811	0.121269	0.0724619	-0.0207541	0.263291	0.0942191	Not assessed	Not assessed
7768	7.37757e-65	0.602132	4.2045e-65	0.343102	0.0547652	12:94220122:G:A	ENSG00000136040_PLXNC1.4564.2.2_sun_pQTL	ENSG00000136040_PLXNC1.4564.2.2_COVID_B1_h	rs115651556	0.0915373	0.0883107	-0.0815486	0.264623	0.299952	Not assessed	Not assessed
7026	2.51433e-06	0.550686	1.8017e-06	0.394551	0.0547585	16:57407652:C:T	ENSG00000102962_CCL22.3508.78.3_sun_pQTL	ENSG00000102962_CCL22.3508.78.3_COVID_A1_h	rs62037107	0.126115	1.14396	-2.116	2.36823	0.912216	Not assessed	Not assessed
18204	1.04277e-05	1.49497e-05	0.388427	0.556814	0.0547337	6:31152952:C:T	ENSG00000226979_LTA.LTB.3506.49.1_sun_pQTL	ENSG00000226979_LTA.LTB.3506.49.1_COVID_B2_h	rs72856706	-2.53807	0.394895	-3.31205	-1.76409	1.2997e-10	Not assessed	Not assessed
4482	0.000855953	0.659992	0.000368487	0.284071	0.0547133	12:55969882:C:A	ENSG00000185664_PMEL.6472.40.3_sun_pQTL	ENSG00000185664_PMEL.6472.40.3_COVID_A1_h	rs3213122	-0.200155	1.11135	-2.37836	1.97805	0.857073	Not assessed	Not assessed
4364	0.216518	0.452529	0.0894283	0.186853	0.0546722	2:27518370:T:C	ENSG00000084734_GCKR.5223.59.3_sun_pQTL	ENSG00000084734_GCKR.5223.59.3_COVID_A1_h	rs780094	2.50814	1.47043	-0.37386	5.39014	0.0880616	Not assessed	Not assessed
6172	2.31163e-05	0.587973	1.40506e-05	0.357329	0.0546612	13:31320378:C:T	ENSG00000187676_B3GALTL.5727.35.3_sun_pQTL	ENSG00000187676_B3GALTL.5727.35.3_COVID_A1_h	rs4943306	-0.956862	0.925697	-2.77119	0.857471	0.301292	Not assessed	Not assessed
7334	8.30988e-15	0.559005	5.74445e-15	0.386375	0.0546201	4:3494956:G:A	ENSG00000163956_LRPAP1.3640.14.3_sun_pQTL	ENSG00000163956_LRPAP1.3640.14.3_COVID_A1_h	rs78770234	0.525216	0.551239	-0.555192	1.60562	0.340695	Not assessed	Not assessed
8205	1.89064e-167	0.557812	1.31391e-167	0.3876	0.054588	19:51024108:G:A	ENSG00000167757_KLK11.2831.29.1_sun_pQTL	ENSG00000167757_KLK11.2831.29.1_COVID_B1_h	rs1048328	0.0994824	0.066165	-0.0301985	0.229163	0.132697	Not assessed	Not assessed
7322	6.72233e-24	0.722943	2.06933e-24	0.222488	0.0545687	4:176729712:C:T	ENSG00000150630_VEGFC.3132.1.1_sun_pQTL	ENSG00000150630_VEGFC.3132.1.1_COVID_C1_h	rs41278571	0.0581477	0.0448237	-0.0297052	0.146001	0.194544	Not assessed	Not assessed
5219	1.21439e-17	0.627622	6.15108e-18	0.317847	0.0545314	17:50547162:A:C	ENSG00000006282_SPATA20.11117.2.3_sun_pQTL	ENSG00000006282_SPATA20.11117.2.3_COVID_A1_h	rs9890200	-0.655292	0.613863	-1.85844	0.547856	0.285751	Not assessed	Not assessed
3546	3.83794e-14	0.683957	1.46791e-14	0.261541	0.0545029	10:73909432:G:T	ENSG00000122861_PLAU.4158.54.2_sun_pQTL	ENSG00000122861_PLAU.4158.54.2_COVID_A1_h	rs2227551	0.322801	0.717947	-1.08435	1.72995	0.652987	Not assessed	Not assessed
7902	0.481145	0.196765	0.189979	0.0776377	0.0544736	6:85958757:C:T	ENSG00000135316_SYNCRIP.4224.7.2_sun_pQTL	ENSG00000135316_SYNCRIP.4224.7.2_COVID_C2_h	rs142653187	0.634354	0.163158	0.31457	0.954139	0.000101085	Not assessed	Not assessed
7715	5.70259e-24	0.645055	2.65693e-24	0.300487	0.054458	4:76022794:G:A	ENSG00000169245_CXCL10.4141.79.1_sun_pQTL	ENSG00000169245_CXCL10.4141.79.1_COVID_B2_h	rs11548618	0.0853412	0.0912973	-0.0935983	0.264281	0.349911	Not assessed	Not assessed
5827	0.0422095	0.57197	0.0227783	0.308609	0.054433	17:45720994:A:G	ENSG00000073969_NSF.13992.12.3_sun_pQTL	ENSG00000073969_NSF.13992.12.3_COVID_A1_h	rs55938136	-0.987217	1.86537	-4.64328	2.66885	0.596644	Not assessed	Not assessed
7213	0	0.662742	0	0.282851	0.0544068	1:19979653:G:C	ENSG00000188257_PLA2G2A.2692.74.2_sun_pQTL	ENSG00000188257_PLA2G2A.2692.74.2_COVID_D1_h	rs11573156	-0.0566477	0.0306124	-0.116647	0.00335157	0.0642444	Not assessed	Not assessed
4301	1.68519e-110	0.655699	7.45222e-111	0.289908	0.0543935	19:41426707:C:T	ENSG00000177191_B3GNT8.9297.12.3_sun_pQTL	ENSG00000177191_B3GNT8.9297.12.3_COVID_A1_h	rs284663	-0.241999	0.28747	-0.80543	0.321432	0.399887	Not assessed	Not assessed
5691	4.59636e-41	0.590065	2.77e-41	0.355548	0.0543873	3:113907086:C:G	ENSG00000178075_GRAMD1C.8336.267.3_sun_pQTL	ENSG00000178075_GRAMD1C.8336.267.3_COVID_A1_h	rs61077924	0.451167	0.444653	-0.420336	1.32267	0.310272	Not assessed	Not assessed
6247	3.84429e-14	0.568999	2.54489e-14	0.376619	0.0543826	8:39923925:C:T	ENSG00000131203_IDO1.9759.13.3_sun_pQTL	ENSG00000131203_IDO1.9759.13.3_COVID_A1_h	rs7010461	0.87008	0.78928	-0.67688	2.41704	0.2703	Not assessed	Not assessed
5920	4.81369e-70	0.594424	2.84445e-70	0.351196	0.0543797	5:136053744:C:T	ENSG00000120708_TGFBI.3283.21.1_sun_pQTL	ENSG00000120708_TGFBI.3283.21.1_COVID_A1_h	rs13159365	0.378166	0.329948	-0.268521	1.02485	0.251738	Not assessed	Not assessed
7161	9.99086e-05	0.693357	3.63438e-05	0.252169	0.0543376	4:1729894:T:C	ENSG00000068078_FGFR3.13669.6.3_sun_pQTL	ENSG00000068078_FGFR3.13669.6.3_COVID_B2_h	rs798763	-0.364045	0.156392	-0.670568	-0.0575218	0.0199244	Not assessed	Not assessed
4443	0.00570556	0.664476	0.00234591	0.273153	0.0543198	1:1353443:A:G	ENSG00000162576_MXRA8.10521.10.3_sun_pQTL	ENSG00000162576_MXRA8.10521.10.3_COVID_A1_h	rs2296471	0.131743	1.09792	-2.02014	2.28362	0.904488	Not assessed	Not assessed
6772	7.2404e-16	0.559669	4.99502e-16	0.386051	0.0542796	9:133041137:C:T	ENSG00000170835_CEL.9796.4.3_sun_pQTL	ENSG00000170835_CEL.9796.4.3_COVID_A1_h	rs56314203	-0.629873	0.834108	-2.2647	1.00495	0.450162	Not assessed	Not assessed
5324	1.21619e-12	0.617881	6.45406e-13	0.327842	0.0542768	7:66087510:A:G	ENSG00000169902_TPST1.7928.183.3_sun_pQTL	ENSG00000169902_TPST1.7928.183.3_COVID_A1_h	rs313829	0.655166	0.733463	-0.782395	2.09273	0.371723	Not assessed	Not assessed
6634	8.56195e-13	0.585401	5.27082e-13	0.360324	0.0542744	22:36242659:C:T	ENSG00000100342_APOL1.11510.31.3_sun_pQTL	ENSG00000100342_APOL1.11510.31.3_COVID_A1_h	rs71314970	-0.611397	0.592922	-1.7735	0.550708	0.302466	Not assessed	Not assessed
6774	4.82724e-303	0.572205	3.15164e-303	0.373531	0.0542633	19:54633642:G:C	ENSG00000104972_LILRB1.5090.49.2_sun_pQTL	ENSG00000104972_LILRB1.5090.49.2_COVID_A1_h	rs2114511	-0.16106	0.184742	-0.523148	0.201027	0.383311	Not assessed	Not assessed
6306	0	0.532385	0	0.413381	0.0542339	14:65330128:G:C	ENSG00000033170_FUT8.8244.16.3_sun_pQTL	ENSG00000033170_FUT8.8244.16.3_COVID_A1_h	rs2127870	0.202555	0.162183	-0.115318	0.520428	0.211692	Not assessed	Not assessed
3678	4.71063e-08	0.707707	1.58502e-08	0.238074	0.054219	17:27632329:A:G	ENSG00000168961_LGALS9.9197.4.3_sun_pQTL	ENSG00000168961_LGALS9.9197.4.3_COVID_A1_h	rs3794195	-0.6594	0.800524	-2.2284	0.909597	0.410104	Not assessed	Not assessed
4734	0.0793467	0.651295	0.0233731	0.191798	0.0541874	17:42112643:C:G	ENSG00000108771_DHX58.14012.17.3_sun_pQTL	ENSG00000108771_DHX58.14012.17.3_COVID_C2_h	rs2277621	-0.25558	0.107328	-0.465939	-0.0452217	0.0172514	Not assessed	Not assessed
7713	3.064e-11	0.576216	1.96563e-11	0.369602	0.0541816	3:105565201:T:C	ENSG00000170017_ALCAM.5451.1.3_sun_pQTL	ENSG00000170017_ALCAM.5451.1.3_COVID_B1_h	rs9830049	0.337124	0.221539	-0.0970847	0.771333	0.128075	Not assessed	Not assessed
7034	2.38409e-14	0.571078	1.56486e-14	0.374787	0.054135	5:126825998:C:T	ENSG00000113368_LMNB1.3889.64.2_sun_pQTL	ENSG00000113368_LMNB1.3889.64.2_COVID_A1_h	rs36105360	-0.14819	0.724978	-1.56912	1.27274	0.838036	Not assessed	Not assessed
5682	0.0207492	0.596766	0.0110353	0.317331	0.0541192	4:74382788:G:T	ENSG00000124882_EREG.4956.2.1_sun_pQTL	ENSG00000124882_EREG.4956.2.1_COVID_A1_h	rs78803121	0.573341	1.40732	-2.18496	3.33164	0.683715	Not assessed	Not assessed
5733	7.15646e-223	0.673129	2.90047e-223	0.272761	0.0541097	16:48972547:T:A	ENSG00000102924_CBLN1.9313.27.3_sun_pQTL	ENSG00000102924_CBLN1.9313.27.3_COVID_D1_h	rs10852587	-0.0647173	0.0381916	-0.139571	0.0101369	0.0901622	Not assessed	Not assessed
5474	0.00304022	0.624146	0.00154528	0.317186	0.054083	22:29080781:A:G	ENSG00000183762_KREMEN1.6512.68.3_sun_pQTL	ENSG00000183762_KREMEN1.6512.68.3_COVID_A2_h	rs77320622	0.339524	0.189468	-0.0318276	0.710875	0.0731361	Not assessed	Not assessed
7048	0.00138179	0.548918	0.000993698	0.394693	0.0540136	16:57379748:C:T	ENSG00000006210_CX3CL1.2827.23.2_sun_pQTL	ENSG00000006210_CX3CL1.2827.23.2_COVID_A1_h	rs62037084	1.35037	0.971281	-0.553302	3.25405	0.164437	Not assessed	Not assessed
5776	1.06223e-86	0.609701	5.85997e-87	0.336298	0.0540009	19:43321342:G:C	ENSG00000204936_CD177.13116.25.3_sun_pQTL	ENSG00000204936_CD177.13116.25.3_COVID_A1_h	rs73554000	0.0518151	0.204969	-0.349917	0.453547	0.800427	Not assessed	Not assessed
7327	0.0106914	0.533465	0.00789635	0.393949	0.0539981	6:150054710:T:G	ENSG00000131019_ULBP3.2747.3.2_sun_pQTL	ENSG00000131019_ULBP3.2747.3.2_COVID_A1_h	rs12661709	1.47657	1.3501	-1.16959	4.12272	0.2741	Not assessed	Not assessed
4122	0.485765	0.121214	0.271366	0.0676606	0.0539936	1:155162443:G:A	ENSG00000185499_MUC1.11267.11.3_sun_pQTL	ENSG00000185499_MUC1.11267.11.3_COVID_A2_h	rs11582489	1.54595	0.412324	0.737811	2.35409	0.000177287	Not assessed	Not assessed
7175	8.88414e-19	0.557274	6.19837e-19	0.38875	0.0539755	11:104160870:C:G	ENSG00000170962_PDGFD.9341.1.3_sun_pQTL	ENSG00000170962_PDGFD.9341.1.3_COVID_A1_h	rs7950273	0.681739	0.567188	-0.429929	1.79341	0.229378	Not assessed	Not assessed
7837	2.91012e-93	0.637311	1.41013e-93	0.308761	0.0539273	1:169594713:T:G	ENSG00000174175_SELP.4154.57.2_sun_pQTL	ENSG00000174175_SELP.4154.57.2_COVID_D1_h	rs6136	0.0906317	0.0530187	-0.013283	0.194546	0.0873714	Not assessed	Not assessed
6576	5.00812e-24	0.551675	3.5812e-24	0.394438	0.0538867	4:176729712:C:T	ENSG00000150630_VEGFC.3132.1.1_sun_pQTL	ENSG00000150630_VEGFC.3132.1.1_COVID_A1_h	rs41278571	-0.244987	0.284302	-0.802209	0.312234	0.388844	Not assessed	Not assessed
6545	0.0112253	0.572439	0.00697208	0.355489	0.0538751	19:53821741:G:T	ENSG00000189013_KIR2DL4.5095.7.3_sun_pQTL	ENSG00000189013_KIR2DL4.5095.7.3_COVID_A1_h	rs4632248	0.851866	1.1883	-1.47716	3.18089	0.473449	Not assessed	Not assessed
5586	3.19999e-06	0.783091	6.66468e-07	0.163042	0.0538626	15:40844687:C:T	ENSG00000104129_DNAJC17.14655.1.3_sun_pQTL	ENSG00000104129_DNAJC17.14655.1.3_COVID_C2_h	rs11549914	0.0907203	0.0984384	-0.102215	0.283656	0.35674	Not assessed	Not assessed
5298	0.225282	0.381191	0.126193	0.213473	0.0538607	13:114020974:C:T	ENSG00000186009_ATP4B.9994.217.3_sun_pQTL	ENSG00000186009_ATP4B.9994.217.3_COVID_A1_h	rs9525333	-1.06076	1.80838	-4.60513	2.48361	0.557486	Not assessed	Not assessed
8845	0.0854832	0.150443	0.257361	0.45288	0.0538321	21:42051849:C:G	ENSG00000160180_TFF3.4721.54.2_sun_pQTL	ENSG00000160180_TFF3.4721.54.2_COVID_A2_h	rs2298688	3.31768	0.661776	2.02063	4.61474	5.35038e-07	Not assessed	Not assessed
7397	2.57362e-18	0.687348	9.69307e-19	0.258823	0.0538292	11:123175022:C:T	ENSG00000166250_CLMP.10440.26.3_sun_pQTL	ENSG00000166250_CLMP.10440.26.3_COVID_C2_h	rs35483681	0.139555	0.0618885	0.0182556	0.260854	0.0241371	Not assessed	Not assessed
7112	1.17804e-89	0.669072	4.88014e-90	0.277117	0.0538114	15:80180184:C:T	ENSG00000103876_FAH.11424.4.3_sun_pQTL	ENSG00000103876_FAH.11424.4.3_COVID_D1_h	rs11555096	-0.0646143	0.0535487	-0.169568	0.0403391	0.227568	Not assessed	Not assessed
18531	0.00135892	0.00198527	0.383154	0.559701	0.053801	6:31153455:T:C	ENSG00000226979_LTA.LTB.3506.49.1_sun_pQTL	ENSG00000226979_LTA.LTB.3506.49.1_COVID_C2_h	rs111837807	-1.43789	0.255433	-1.93853	-0.937249	1.81033e-08	Not assessed	Not assessed
5439	3.77222e-13	0.634157	1.85671e-13	0.312082	0.0537617	17:68659675:G:A	ENSG00000108950_FAM20A.6433.57.3_sun_pQTL	ENSG00000108950_FAM20A.6433.57.3_COVID_A1_h	rs929477	-0.277347	0.72042	-1.68934	1.13465	0.700252	Not assessed	Not assessed
6903	0.110446	0.576475	0.0417227	0.217719	0.0536375	1:161744063:C:T	ENSG00000118217_ATF6.11277.23.3_sun_pQTL	ENSG00000118217_ATF6.11277.23.3_COVID_C2_h	rs4657095	-0.351501	0.129901	-0.606102	-0.0968986	0.00681188	Not assessed	Not assessed
5627	0.153201	0.617172	0.0350156	0.141007	0.0536049	9:34593088:G:A	ENSG00000122756_CNTFR.2711.6.2_sun_pQTL	ENSG00000122756_CNTFR.2711.6.2_COVID_C2_h	rs10972159	-0.144314	0.0798862	-0.300888	0.01226	0.0708409	Not assessed	Not assessed
7165	0.384237	0.304745	0.143587	0.113828	0.0536017	2:32840338:C:G	ENSG00000021574_SPAST.8388.24.3_sun_pQTL	ENSG00000021574_SPAST.8388.24.3_COVID_C2_h	rs7565366	0.446951	0.132009	0.188218	0.705685	0.000709825	Not assessed	Not assessed
7172	2.35447e-07	0.615736	1.26466e-07	0.330676	0.0535868	19:45317925:T:C	ENSG00000104879_CKM.2670.67.4_sun_pQTL	ENSG00000104879_CKM.2670.67.4_COVID_B1_h	rs11559024	-0.254199	0.253889	-0.751812	0.243415	0.316721	Not assessed	Not assessed
3534	0.00282486	0.785047	0.000568677	0.157986	0.0535738	17:19385973:G:C	ENSG00000166482_MFAP4.5636.10.3_sun_pQTL	ENSG00000166482_MFAP4.5636.10.3_COVID_D1_h	rs139356332	0.226085	0.265342	-0.293975	0.746145	0.394185	Not assessed	Not assessed
3706	1.5295e-11	0.700883	5.36007e-12	0.245568	0.0535488	3:52443064:T:C	ENSG00000010319_SEMA3G.5628.21.3_sun_pQTL	ENSG00000010319_SEMA3G.5628.21.3_COVID_A1_h	rs2016575	-0.302211	0.795236	-1.86085	1.25642	0.703926	Not assessed	Not assessed
5806	5.62427e-13	0.687421	2.12003e-13	0.259065	0.0535145	15:65400920:C:T	ENSG00000103742_IGDCC4.9793.145.3_sun_pQTL	ENSG00000103742_IGDCC4.9793.145.3_COVID_B1_h	rs35223184	-0.1393	0.226692	-0.583609	0.305008	0.538891	Not assessed	Not assessed
6346	0.228204	0.393749	0.119099	0.205443	0.0535042	7:128501811:T:C	ENSG00000106348_IMPDH1.5229.90.3_sun_pQTL	ENSG00000106348_IMPDH1.5229.90.3_COVID_B1_h	rs1053124	1.00258	0.36213	0.292818	1.71234	0.00563039	Not assessed	Not assessed
6417	6.17922e-18	0.59128	3.71281e-18	0.355219	0.0535007	17:74471487:A:G	ENSG00000167850_CD300C.5066.134.3_sun_pQTL	ENSG00000167850_CD300C.5066.134.3_COVID_A1_h	rs62087214	0.0426551	0.574584	-1.08351	1.16882	0.940822	Not assessed	Not assessed
5420	2.93451e-06	0.717489	9.37042e-07	0.229054	0.0534531	15:40844687:C:T	ENSG00000104129_DNAJC17.14655.1.3_sun_pQTL	ENSG00000104129_DNAJC17.14655.1.3_COVID_D1_h	rs11549914	0.0396157	0.173248	-0.299945	0.379176	0.81913	Not assessed	Not assessed
6209	0.000213494	0.589945	0.000128946	0.356261	0.0534517	19:43652320:T:C	ENSG00000011422_PLAUR.2652.15.1_sun_pQTL	ENSG00000011422_PLAUR.2652.15.1_COVID_A1_h	rs2302524	-0.976679	1.02337	-2.98244	1.02908	0.339893	Not assessed	Not assessed
5125	0.00104033	0.713565	0.000337752	0.231611	0.0534454	1:45763823:C:T	ENSG00000117450_PRDX1.3855.56.1_sun_pQTL	ENSG00000117450_PRDX1.3855.56.1_COVID_B1_h	rs149945226	0.455565	0.282913	-0.0989334	1.01006	0.107339	Not assessed	Not assessed
4428	1.27979e-38	0.691228	4.72835e-39	0.25533	0.0534422	1:196334759:T:C	ENSG00000134389_CFHR5.7885.17.3_sun_pQTL	ENSG00000134389_CFHR5.7885.17.3_COVID_A2_h	rs72732234	-0.0879409	0.115353	-0.314029	0.138148	0.445845	Not assessed	Not assessed
6582	7.64222e-49	0.564179	5.18059e-49	0.382398	0.053423	1:103524734:C:T	ENSG00000237763_AMY1A.7918.114.3_sun_pQTL	ENSG00000237763_AMY1A.7918.114.3_COVID_A1_h	rs7538379	0.291461	0.377421	-0.448271	1.03119	0.43997	Not assessed	Not assessed
5703	0	0.611789	0	0.334867	0.0533442	12:6453670:G:A	ENSG00000139192_TAPBPL.6364.7.3_sun_pQTL	ENSG00000139192_TAPBPL.6364.7.3_COVID_A1_h	rs2041388	0.1349	0.131264	-0.122373	0.392172	0.304091	Not assessed	Not assessed
7033	2.5366e-38	0.579273	1.60899e-38	0.367385	0.0533421	1:159035061:C:T	ENSG00000163565_IFI16.12893.159.3_sun_pQTL	ENSG00000163565_IFI16.12893.159.3_COVID_A1_h	rs72709516	-0.189	0.435313	-1.0422	0.664199	0.664165	Not assessed	Not assessed
5271	0.0265851	0.588225	0.014352	0.317501	0.0533363	2:185978984:T:C	ENSG00000144369_FAM171B.8786.6.3_sun_pQTL	ENSG00000144369_FAM171B.8786.6.3_COVID_A1_h	rs7582142	2.41603	1.46125	-0.447956	5.28002	0.0982482	Not assessed	Not assessed
6244	0.127432	0.296459	0.157179	0.365609	0.0533207	2:121053579:A:T	ENSG00000211460_TSN.12477.42.3_sun_pQTL	ENSG00000211460_TSN.12477.42.3_COVID_D1_h	rs6758991	0.539241	0.260379	0.0289074	1.04958	0.0383602	Not assessed	Not assessed
6182	0	0.584758	0	0.361964	0.0532782	1:161671594:G:A	ENSG00000072694_FCGR2B.3310.62.1_sun_pQTL	ENSG00000072694_FCGR2B.3310.62.1_COVID_A1_h	rs6665610	0.164901	0.18135	-0.190538	0.520339	0.363193	Not assessed	Not assessed
6272	8.46882e-265	0.608107	4.71671e-265	0.338632	0.0532613	6:122801319:C:T	ENSG00000172594_SMPDL3A.14086.11.3_sun_pQTL	ENSG00000172594_SMPDL3A.14086.11.3_COVID_A1_h	rs28385609	0.167423	0.172666	-0.170997	0.505843	0.33223	Not assessed	Not assessed
7344	3.44122e-08	0.557383	2.40422e-08	0.389364	0.0532529	7:45914866:G:A	ENSG00000146674_IGFBP3.2571.12.3_sun_pQTL	ENSG00000146674_IGFBP3.2571.12.3_COVID_A1_h	rs145188037	0.270365	0.545387	-0.798573	1.3393	0.620084	Not assessed	Not assessed
6713	2.55647e-05	0.659416	1.11418e-05	0.287338	0.0532093	13:31300856:G:A	ENSG00000187676_B3GALTL.5727.35.3_sun_pQTL	ENSG00000187676_B3GALTL.5727.35.3_COVID_B2_h	rs4941811	-0.283549	0.134096	-0.546373	-0.0207252	0.034471	Not assessed	Not assessed
4221	2.08297e-34	0.63921	1.00265e-34	0.307635	0.0531554	17:36064257:A:G	ENSG00000276085_CCL3L1.2783.18.2_sun_pQTL	ENSG00000276085_CCL3L1.2783.18.2_COVID_A1_h	rs2015086	-0.318468	0.444153	-1.18899	0.552057	0.47336	Not assessed	Not assessed
6751	0.102214	0.531919	0.0504145	0.262303	0.0531497	1:161940930:T:C	ENSG00000118217_ATF6.11277.23.3_sun_pQTL	ENSG00000118217_ATF6.11277.23.3_COVID_A2_h	rs4233381	0.530363	0.347466	-0.150658	1.21138	0.126917	Not assessed	Not assessed
5972	6.48369e-18	0.606808	3.63389e-18	0.340043	0.0531488	20:46013767:G:C	ENSG00000100985_MMP9.2579.17.5_sun_pQTL	ENSG00000100985_MMP9.2579.17.5_COVID_A1_h	rs2250889	0.163671	0.557467	-0.928943	1.25629	0.769065	Not assessed	Not assessed
6453	0.041137	0.643966	0.0157204	0.246037	0.0531396	9:86091181:G:A	ENSG00000135052_GOLM1.8983.7.3_sun_pQTL	ENSG00000135052_GOLM1.8983.7.3_COVID_B2_h	rs12235357	-0.309653	0.164891	-0.632833	0.0135274	0.0603914	Not assessed	Not assessed
5947	1.273e-12	0.678951	5.0244e-13	0.267923	0.0531257	17:56778779:A:G	ENSG00000183691_NOG.5846.24.3_sun_pQTL	ENSG00000183691_NOG.5846.24.3_COVID_B1_h	rs79084672	0.00798892	0.202951	-0.389788	0.405765	0.9686	Not assessed	Not assessed
6680	1.75049e-36	0.577643	1.11909e-36	0.369234	0.0531229	1:168534148:C:T	ENSG00000143184_XCL1.14078.69.3_sun_pQTL	ENSG00000143184_XCL1.14078.69.3_COVID_A1_h	rs4656599	0.697369	0.527776	-0.337054	1.73179	0.18639	Not assessed	Not assessed
6973	0.369852	0.216252	0.227717	0.133093	0.0530864	1:160967432:C:T	ENSG00000173110_HSPA6.13672.3.3_sun_pQTL	ENSG00000173110_HSPA6.13672.3.3_COVID_D1_h	rs28809889	1.39973	0.390336	0.634687	2.16478	0.000335834	Not assessed	Not assessed
5533	0.414547	0.213356	0.210663	0.10837	0.0530634	1:51911283:G:A	ENSG00000117862_TXNDC12.4815.25.3_sun_pQTL	ENSG00000117862_TXNDC12.4815.25.3_COVID_C2_h	rs56036558	0.380289	0.123382	0.138466	0.622112	0.00205462	Not assessed	Not assessed
6050	9.1346e-124	0.575269	5.90255e-124	0.371672	0.0530592	3:186605001:T:C	ENSG00000145192_AHSG.3581.53.3_sun_pQTL	ENSG00000145192_AHSG.3581.53.3_COVID_A1_h	rs6444148	0.303805	0.278969	-0.242965	0.850575	0.276143	Not assessed	Not assessed
5391	1.2627e-114	0.633474	6.24988e-115	0.313491	0.0530346	10:50267849:A:C	ENSG00000188611_ASAH2.3212.30.3_sun_pQTL	ENSG00000188611_ASAH2.3212.30.3_COVID_A2_h	rs10740617	-0.116615	0.0630638	-0.240218	0.00698756	0.0644343	Not assessed	Not assessed
4933	0.0129194	0.635922	0.00593787	0.292222	0.0529985	2:162182309:C:T	ENSG00000078098_FAP.5029.3.1_sun_pQTL	ENSG00000078098_FAP.5029.3.1_COVID_B1_h	rs78034415	0.57033	0.283048	0.015567	1.12509	0.0439086	Not assessed	Not assessed
7521	1.68697e-21	0.550011	1.21786e-21	0.397013	0.0529763	4:56823294:C:T	ENSG00000128040_SPINK2.13405.61.3_sun_pQTL	ENSG00000128040_SPINK2.13405.61.3_COVID_A1_h	rs11941335	0.00553972	0.643347	-1.2554	1.26648	0.99313	Not assessed	Not assessed
7624	0.0144813	0.704606	0.00459191	0.223373	0.0529482	4:75934945:AT:A	ENSG00000138755_CXCL9.9188.119.3_sun_pQTL	ENSG00000138755_CXCL9.9188.119.3_COVID_D1_h	rs34467552	-0.699723	0.313713	-1.31459	-0.0848571	0.0257171	Not assessed	Not assessed
5783	6.52725e-08	0.580565	4.12127e-08	0.366513	0.0529222	12:58879191:T:C	ENSG00000139263_LRIG3.3322.52.2_sun_pQTL	ENSG00000139263_LRIG3.3322.52.2_COVID_A1_h	rs11172791	-0.083404	0.853849	-1.75692	1.59011	0.922186	Not assessed	Not assessed
5734	1.32165e-12	0.712832	4.34481e-13	0.234284	0.0528843	17:56778779:A:G	ENSG00000183691_NOG.5846.24.3_sun_pQTL	ENSG00000183691_NOG.5846.24.3_COVID_A2_h	rs79084672	0.0606322	0.168356	-0.26934	0.390605	0.718741	Not assessed	Not assessed
6583	1.59487e-176	0.673528	6.48007e-177	0.273607	0.0528644	6:46864361:T:C	ENSG00000069122_ADGRF5.6409.57.3_sun_pQTL	ENSG00000069122_ADGRF5.6409.57.3_COVID_B2_h	rs628638	0.0477547	0.0277408	-0.00661627	0.102126	0.0851672	Not assessed	Not assessed
7993	1.74174e-18	0.537539	1.32752e-18	0.40965	0.0528115	5:179802151:A:G	ENSG00000161013_MGAT4B.7141.21.3_sun_pQTL	ENSG00000161013_MGAT4B.7141.21.3_COVID_A1_h	rs58413676	-0.570239	0.840415	-2.21742	1.07694	0.497441	Not assessed	Not assessed
5812	9.87139e-97	0.587517	6.04425e-97	0.359684	0.0527993	1:205043070:T:G	ENSG00000184144_CNTN2.3296.92.2_sun_pQTL	ENSG00000184144_CNTN2.3296.92.2_COVID_A1_h	rs2071533	0.224179	0.468968	-0.694982	1.14334	0.632632	Not assessed	Not assessed
6934	1.46091e-147	0.579167	9.28492e-148	0.36804	0.0527936	16:75221319:A:G	ENSG00000168925_CTRB1.5671.1.3_sun_pQTL	ENSG00000168925_CTRB1.5671.1.3_COVID_A1_h	rs8051363	0.292922	0.275676	-0.247393	0.833237	0.287982	Not assessed	Not assessed
6119	8.24731e-47	0.724735	2.53235e-47	0.222478	0.0527869	11:120227620:C:T	ENSG00000184232_OAF.6414.8.3_sun_pQTL	ENSG00000184232_OAF.6414.8.3_COVID_C2_h	rs117554512	-0.0692532	0.0342019	-0.136288	-0.00221878	0.0428841	Not assessed	Not assessed
6916	2.86239e-268	0.492057	2.64818e-268	0.45518	0.0527632	9:89379518:C:T	ENSG00000187764_SEMA4D.5737.61.3_sun_pQTL	ENSG00000187764_SEMA4D.5737.61.3_COVID_A1_h	rs45464494	0.231942	0.182093	-0.124954	0.588838	0.202751	Not assessed	Not assessed
6322	1.13899e-37	0.673986	4.61893e-38	0.273269	0.0527446	2:108986407:T:C	ENSG00000135960_EDAR.2977.7.2_sun_pQTL	ENSG00000135960_EDAR.2977.7.2_COVID_D1_h	rs116475987	-0.0822587	0.0774323	-0.234023	0.0695059	0.288086	Not assessed	Not assessed
4329	5.83531e-82	0.634051	2.88314e-82	0.313222	0.0527265	17:36064257:A:G	ENSG00000277632_CCL3.3040.59.1_sun_pQTL	ENSG00000277632_CCL3.3040.59.1_COVID_A1_h	rs2015086	-0.219389	0.305972	-0.819083	0.380306	0.47336	Not assessed	Not assessed
5896	2.22737e-07	0.613281	1.21332e-07	0.334022	0.0526968	1:160469033:T:G	ENSG00000162739_SLAMF6.5128.53.3_sun_pQTL	ENSG00000162739_SLAMF6.5128.53.3_COVID_A1_h	rs73012459	0.917946	0.882525	-0.81177	2.64766	0.298276	Not assessed	Not assessed
4863	0.0186399	0.689322	0.006303	0.233039	0.052696	8:85533122:C:G	ENSG00000133742_CA1.4969.2.1_sun_pQTL	ENSG00000133742_CA1.4969.2.1_COVID_B1_h	rs147156208	-0.0915464	0.230106	-0.542546	0.359453	0.690745	Not assessed	Not assessed
4285	2.52684e-81	0.716671	8.1341e-82	0.230649	0.0526803	1:150764744:A:G	ENSG00000163131_CTSS.3181.50.2_sun_pQTL	ENSG00000163131_CTSS.3181.50.2_COVID_B1_h	rs41271951	-0.113133	0.0871621	-0.283968	0.0577015	0.194301	Not assessed	Not assessed
6361	1.94295e-48	0.717057	6.24092e-49	0.230272	0.0526719	19:44909976:G:T	ENSG00000130203_APOE.2937.10.2_sun_pQTL	ENSG00000130203_APOE.2937.10.2_COVID_D1_h	rs1065853	-0.15936	0.10377	-0.362746	0.0440261	0.124612	Not assessed	Not assessed
5266	2.70361e-09	0.619027	1.43466e-09	0.328432	0.0525404	2:113074735:T:C	ENSG00000136689_IL1RN.5353.89.2_sun_pQTL	ENSG00000136689_IL1RN.5353.89.2_COVID_A1_h	rs6761276	0.909229	0.775931	-0.611567	2.43003	0.241281	Not assessed	Not assessed
4696	7.14766e-05	0.675068	2.8838e-05	0.272311	0.0525207	1:153365467:G:A	ENSG00000163221_S100A12.5852.6.3_sun_pQTL	ENSG00000163221_S100A12.5852.6.3_COVID_A1_h	rs3014874	-0.797961	0.9594	-2.67835	1.08243	0.405561	Not assessed	Not assessed
5209	1.76466e-09	0.615111	9.53912e-10	0.332454	0.0524357	21:33343393:G:C	ENSG00000142166_IFNAR1.9183.7.3_sun_pQTL	ENSG00000142166_IFNAR1.9183.7.3_COVID_A1_h	rs2257167	-0.593821	0.773835	-2.11051	0.922868	0.442859	Not assessed	Not assessed
6812	5.76212e-05	0.627383	2.94039e-05	0.320099	0.0524314	7:97479644:T:C	ENSG00000006128_TAC1.9337.43.3_sun_pQTL	ENSG00000006128_TAC1.9337.43.3_COVID_A2_h	rs11977936	-0.279708	0.160935	-0.595135	0.0357183	0.0822071	Not assessed	Not assessed
6296	3.18488e-11	0.602095	1.82784e-11	0.345498	0.0524068	20:24995199:A:C	ENSG00000101474_APMAP.10605.22.3_sun_pQTL	ENSG00000101474_APMAP.10605.22.3_COVID_A1_h	rs8125909	-0.542535	0.85969	-2.2275	1.14243	0.527987	Not assessed	Not assessed
7737	2.87194e-259	0.649759	1.31669e-259	0.297842	0.0523989	19:5840608:C:T	ENSG00000171124_FUT3.4548.4.2_sun_pQTL	ENSG00000171124_FUT3.4548.4.2_COVID_D1_h	rs708686	0.0649508	0.0348101	-0.00327575	0.133177	0.0620609	Not assessed	Not assessed
5268	1.16326e-23	0.615529	6.2772e-24	0.332099	0.0523719	2:186814195:T:C	ENSG00000144369_FAM171B.8851.42.3_sun_pQTL	ENSG00000144369_FAM171B.8851.42.3_COVID_A1_h	rs11685506	-0.560758	0.54207	-1.6232	0.50168	0.300914	Not assessed	Not assessed
4416	0.360445	0.0893037	0.39907	0.098821	0.0523599	5:93184435:G:A	ENSG00000113391_FAM172A.5615.62.3_sun_pQTL	ENSG00000113391_FAM172A.5615.62.3_COVID_D1_h	rs13161855	-2.87102	0.615948	-4.07825	-1.66378	3.14475e-06	Not assessed	Not assessed
5605	1.48559e-21	0.703381	5.16117e-22	0.244314	0.052305	13:52397382:C:T	ENSG00000136114_THSD1.5621.64.3_sun_pQTL	ENSG00000136114_THSD1.5621.64.3_COVID_D1_h	rs41292808	-0.117198	0.0882007	-0.290069	0.0556718	0.183924	Not assessed	Not assessed
6217	0.00144223	0.602279	0.000821963	0.343202	0.0522548	5:150466168:C:T	ENSG00000070614_NDST1.6927.7.3_sun_pQTL	ENSG00000070614_NDST1.6927.7.3_COVID_A1_h	rs6870546	-0.853941	1.16348	-3.13432	1.42644	0.462976	Not assessed	Not assessed
6877	2.11741e-135	0.563808	1.44219e-135	0.383963	0.052229	5:157105355:C:A	ENSG00000135077_HAVCR2.5134.52.2_sun_pQTL	ENSG00000135077_HAVCR2.5134.52.2_COVID_A1_h	rs7445342	0.264609	0.265697	-0.256147	0.785365	0.319296	Not assessed	Not assessed
6174	9.29912e-230	0.589421	5.65456e-230	0.35836	0.0522194	19:40769143:T:C	ENSG00000261857_MIA.2687.2.1_sun_pQTL	ENSG00000261857_MIA.2687.2.1_COVID_B2_h	rs2604877	-0.0431678	0.0260769	-0.0942775	0.00794191	0.0978421	Not assessed	Not assessed
6229	1.56653e-83	0.602518	8.97845e-84	0.345277	0.0522051	1:159813769:C:T	ENSG00000181036_FCRL6.6617.12.3_sun_pQTL	ENSG00000181036_FCRL6.6617.12.3_COVID_A1_h	rs58240276	0.291861	0.298146	-0.292494	0.876216	0.327619	Not assessed	Not assessed
5210	0.364518	0.130009	0.334159	0.11913	0.0521839	2:219528508:G:A	ENSG00000187736_NHEJ1.11351.233.3_sun_pQTL	ENSG00000187736_NHEJ1.11351.233.3_COVID_A2_h	rs56042015	-2.61494	0.630834	-3.85135	-1.37853	3.39507e-05	Not assessed	Not assessed
5131	6.49536e-223	0.612299	3.55989e-223	0.335528	0.0521729	16:48972547:T:A	ENSG00000102924_CBLN1.9313.27.3_sun_pQTL	ENSG00000102924_CBLN1.9313.27.3_COVID_A1_h	rs10852587	-0.160722	0.189745	-0.532616	0.211172	0.396973	Not assessed	Not assessed
4448	0.159744	0.535272	0.0581214	0.194701	0.0521615	16:67939604:A:G	ENSG00000167261_DPEP2.8327.26.3_sun_pQTL	ENSG00000167261_DPEP2.8327.26.3_COVID_A2_h	rs17240406	-0.150938	0.116925	-0.380107	0.0782309	0.19674	Not assessed	Not assessed
5738	0.393628	0.275639	0.163895	0.114716	0.0521218	12:50448109:C:T	ENSG00000050438_SLC4A8.12798.46.3_sun_pQTL	ENSG00000050438_SLC4A8.12798.46.3_COVID_A2_h	rs10747581	-1.08774	0.371574	-1.81601	-0.359469	0.00341826	Not assessed	Not assessed
8223	0.319525	0.211097	0.251297	0.165969	0.052112	20:57441914:C:T	ENSG00000124225_PMEPA1.6936.7.3_sun_pQTL	ENSG00000124225_PMEPA1.6936.7.3_COVID_B2_h	rs116602623	-0.826474	0.209039	-1.23618	-0.416764	7.6959e-05	Not assessed	Not assessed
7463	1.29111e-50	0.62834	6.56718e-51	0.319551	0.0521094	1:180194255:A:G	ENSG00000116260_QSOX1.6217.23.3_sun_pQTL	ENSG00000116260_QSOX1.6217.23.3_COVID_B1_h	rs12371	-0.152237	0.10969	-0.367225	0.0627507	0.165171	Not assessed	Not assessed
7247	5.0983e-06	0.547923	3.7221e-06	0.399968	0.0521001	2:54135589:A:G	ENSG00000170634_ACYP2.12812.25.3_sun_pQTL	ENSG00000170634_ACYP2.12812.25.3_COVID_A1_h	rs13417064	0.612729	0.91448	-1.17962	2.40508	0.502839	Not assessed	Not assessed
7034	1.02484e-59	0.71895	3.26467e-60	0.228972	0.0520776	1:161538827:A:G	ENSG00000162747_FCGR3B.3311.27.1_sun_pQTL	ENSG00000162747_FCGR3B.3311.27.1_COVID_C1_h	rs10919543	-0.0814886	0.0391408	-0.158203	-0.00477403	0.0373485	Not assessed	Not assessed
6750	1.95376e-34	0.57474	1.26886e-34	0.373211	0.0520489	19:50723250:G:A	ENSG00000105472_CLEC11A.2966.65.2_sun_pQTL	ENSG00000105472_CLEC11A.2966.65.2_COVID_A1_h	rs141369989	-0.102568	0.362024	-0.812122	0.606986	0.776932	Not assessed	Not assessed
9224	1.35574e-18	0.579621	8.61679e-19	0.368343	0.0520362	5:179802151:A:G	ENSG00000161013_MGAT4B.7141.21.3_sun_pQTL	ENSG00000161013_MGAT4B.7141.21.3_COVID_B1_h	rs58413676	-0.193108	0.113539	-0.41564	0.0294253	0.0889805	Not assessed	Not assessed
6542	0.00795742	0.575717	0.00496736	0.359336	0.0520223	11:124660768:T:C	ENSG00000110013_SIAE.9263.57.3_sun_pQTL	ENSG00000110013_SIAE.9263.57.3_COVID_A1_h	rs78778622	-0.452713	1.26738	-2.93673	2.0313	0.720939	Not assessed	Not assessed
8192	5.29421e-06	0.626905	2.71184e-06	0.321066	0.0520209	16:1429985:A:G	ENSG00000090581_GNPTG.10666.7.3_sun_pQTL	ENSG00000090581_GNPTG.10666.7.3_COVID_A2_h	rs6600144	-0.532324	0.255981	-1.03404	-0.0306102	0.0375674	Not assessed	Not assessed
6335	1.55956e-21	0.599314	9.07495e-22	0.348685	0.0520007	9:33113324:C:T	ENSG00000086062_B4GALT1.13381.49.3_sun_pQTL	ENSG00000086062_B4GALT1.13381.49.3_COVID_A1_h	rs7019909	-0.412506	0.542787	-1.47635	0.651337	0.447268	Not assessed	Not assessed
5188	0.0445392	0.595769	0.0214064	0.286286	0.0520002	2:69423598:G:A	ENSG00000169599_NFU1.7770.25.3_sun_pQTL	ENSG00000169599_NFU1.7770.25.3_COVID_A1_h	rs74637005	-0.00683195	1.09752	-2.15792	2.14426	0.995033	Not assessed	Not assessed
7660	1.3171e-18	0.625763	6.78422e-19	0.322271	0.0519657	17:4781933:G:A	ENSG00000182327_GLTPD2.7948.129.3_sun_pQTL	ENSG00000182327_GLTPD2.7948.129.3_COVID_B1_h	rs34460487	-0.285343	0.169322	-0.617208	0.0465219	0.0919481	Not assessed	Not assessed
5307	0.105165	0.0429886	0.567834	0.232064	0.0519485	11:14244913:A:G	ENSG00000110680_CALCA.10494.48.3_sun_pQTL	ENSG00000110680_CALCA.10494.48.3_COVID_B2_h	rs10734222	2.42294	0.48586	1.47067	3.37521	6.1354e-07	Not assessed	Not assessed
6353	0.000449064	0.674323	0.000181959	0.273181	0.0518657	19:44804951:G:A	ENSG00000187244_BCAM.2816.50.2_sun_pQTL	ENSG00000187244_BCAM.2816.50.2_COVID_A2_h	rs144579705	0.0808699	0.226297	-0.362664	0.524403	0.720821	Not assessed	Not assessed
6188	1.13316e-24	0.647968	5.25036e-25	0.300176	0.0518556	1:11859214:A:G	ENSG00000120937_NPPB.7655.11.3_sun_pQTL	ENSG00000120937_NPPB.7655.11.3_COVID_B1_h	rs198389	-0.295276	0.179554	-0.647194	0.0566423	0.100073	Not assessed	Not assessed
7011	0.377583	0.160085	0.288307	0.122183	0.0518417	19:49145413:C:T	ENSG00000104863_LIN7B.4238.4.2_sun_pQTL	ENSG00000104863_LIN7B.4238.4.2_COVID_C1_h	rs4802575	0.985468	0.237017	0.520923	1.45001	3.21337e-05	Not assessed	Not assessed
6759	0.32094	0.3058	0.164621	0.156803	0.0518367	19:40320424:C:T	ENSG00000105223_PLD3.10948.14.3_sun_pQTL	ENSG00000105223_PLD3.10948.14.3_COVID_A2_h	rs8106701	-1.62545	0.57507	-2.75256	-0.498333	0.00470562	Not assessed	Not assessed
10004	0.0404734	0.52013	0.0279865	0.359608	0.0518019	13:23814451:C:T	ENSG00000127863_TNFRSF19.5131.15.3_sun_pQTL	ENSG00000127863_TNFRSF19.5131.15.3_COVID_A2_h	rs141389489	-0.307692	0.195049	-0.689982	0.0745977	0.114678	Not assessed	Not assessed
6376	7.58214e-08	0.678877	3.00873e-08	0.269339	0.0517846	12:58879191:T:C	ENSG00000139263_LRIG3.3322.52.2_sun_pQTL	ENSG00000139263_LRIG3.3322.52.2_COVID_A2_h	rs11172791	0.0573465	0.227357	-0.388266	0.502959	0.800863	Not assessed	Not assessed
7734	0.357183	0.193486	0.257899	0.139653	0.0517795	17:77285672:C:T	ENSG00000070526_ST6GALNAC1.7867.154.3_sun_pQTL	ENSG00000070526_ST6GALNAC1.7867.154.3_COVID_C1_h	rs9891329	-0.916086	0.221047	-1.34933	-0.482842	3.40848e-05	Not assessed	Not assessed
4083	0.284106	0.45578	0.0800252	0.128329	0.0517593	10:72879221:C:T	ENSG00000138308_PLA2G12B.9380.2.3_sun_pQTL	ENSG00000138308_PLA2G12B.9380.2.3_COVID_B1_h	rs11000435	0.704258	0.446183	-0.170246	1.57876	0.114473	Not assessed	Not assessed
7607	0.015877	0.609662	0.00819332	0.314563	0.0517051	14:92891302:C:G	ENSG00000100604_CHGA.8476.11.3_sun_pQTL	ENSG00000100604_CHGA.8476.11.3_COVID_B1_h	rs12436684	-0.824886	0.336408	-1.48423	-0.165539	0.0142048	Not assessed	Not assessed
6573	1.25829e-177	0.626858	6.45339e-178	0.321444	0.0516983	2:85708059:A:G	ENSG00000115523_GNLY.3195.50.2_sun_pQTL	ENSG00000115523_GNLY.3195.50.2_COVID_D1_h	rs7603438	0.0752619	0.0404045	-0.00392942	0.154453	0.0625028	Not assessed	Not assessed
8362	5.29389e-05	0.595932	3.12996e-05	0.352288	0.0516957	19:56177412:G:C	ENSG00000197487_GALP.9398.30.3_sun_pQTL	ENSG00000197487_GALP.9398.30.3_COVID_D1_h	rs111265125	-0.200464	0.15637	-0.506943	0.106015	0.199848	Not assessed	Not assessed
7074	3.56368e-33	0.546508	2.62044e-33	0.401806	0.0516855	21:36074301:C:A	ENSG00000159228_CBR1.12381.26.3_sun_pQTL	ENSG00000159228_CBR1.12381.26.3_COVID_A1_h	rs16993864	-0.101852	0.437495	-0.959326	0.755622	0.815912	Not assessed	Not assessed
7093	9.27623e-07	0.563723	6.32945e-07	0.384594	0.0516812	17:1733656:C:A	ENSG00000167711_SERPINF2.3024.18.2_sun_pQTL	ENSG00000167711_SERPINF2.3024.18.2_COVID_A1_h	rs11657394	-0.690055	0.886817	-2.42818	1.04807	0.436495	Not assessed	Not assessed
3858	0.0238314	0.6539	0.00951884	0.261132	0.0516172	1:206913708:A:G	ENSG00000162894_FAIM3.6574.11.3_sun_pQTL	ENSG00000162894_FAIM3.6574.11.3_COVID_A1_h	rs72758947	0.173685	1.22595	-2.22914	2.57651	0.887338	Not assessed	Not assessed
7797	8.91446e-19	0.593684	5.32795e-19	0.354779	0.0515368	4:167066353:G:T	ENSG00000196104_SPOCK3.9906.21.3_sun_pQTL	ENSG00000196104_SPOCK3.9906.21.3_COVID_B1_h	rs1427626	-0.260979	0.154317	-0.563435	0.0414773	0.0908015	Not assessed	Not assessed
8585	0.129152	0.416964	0.095171	0.307206	0.0515071	4:3524918:C:T	ENSG00000163956_LRPAP1.8829.4.3_sun_pQTL	ENSG00000163956_LRPAP1.8829.4.3_COVID_B1_h	rs11549516	-0.779501	0.32653	-1.41949	-0.139514	0.016976	Not assessed	Not assessed
5028	8.33145e-05	0.636097	4.091e-05	0.312292	0.051486	10:87487108:C:T	ENSG00000107789_MINPP1.5586.66.3_sun_pQTL	ENSG00000107789_MINPP1.5586.66.3_COVID_A1_h	rs10887722	-1.17996	0.964833	-3.071	0.711077	0.221341	Not assessed	Not assessed
4612	4.10288e-203	0.669077	1.71401e-203	0.27946	0.0514628	16:72080103:C:T	ENSG00000257017_HP.3054.3.2_sun_pQTL	ENSG00000257017_HP.3054.3.2_COVID_A1_h	rs217181	-0.155603	0.228244	-0.602953	0.291746	0.495402	Not assessed	Not assessed
4917	1.22825e-13	0.643831	5.81396e-14	0.304707	0.0514617	1:117418549:A:T	ENSG00000198162_MAN1A2.9077.10.3_sun_pQTL	ENSG00000198162_MAN1A2.9077.10.3_COVID_A1_h	rs7512060	-0.327757	0.63697	-1.57619	0.920681	0.606863	Not assessed	Not assessed
5980	0	0.599329	0	0.349209	0.0514616	5:96393702:G:A	ENSG00000175426_PCSK1.13388.57.3_sun_pQTL	ENSG00000175426_PCSK1.13388.57.3_COVID_A1_h	rs13169290	0.15369	0.150146	-0.14059	0.44797	0.306022	Not assessed	Not assessed
4591	0.0815047	0.651753	0.0239374	0.191365	0.05144	17:42118220:G:C	ENSG00000108771_DHX58.14012.17.3_sun_pQTL	ENSG00000108771_DHX58.14012.17.3_COVID_B2_h	rs2074164	-0.412853	0.194088	-0.793258	-0.0324487	0.0334077	Not assessed	Not assessed
5492	7.0949e-47	0.62664	3.64553e-47	0.321931	0.0514296	11:120227620:C:T	ENSG00000184232_OAF.6414.8.3_sun_pQTL	ENSG00000184232_OAF.6414.8.3_COVID_A1_h	rs117554512	0.0813644	0.413366	-0.728817	0.891546	0.843957	Not assessed	Not assessed
5381	0.0717143	0.553006	0.037185	0.286691	0.0514041	1:174774607:C:T	ENSG00000116161_CACYBP.12432.23.3_sun_pQTL	ENSG00000116161_CACYBP.12432.23.3_COVID_A1_h	rs113664961	2.96407	1.34707	0.323852	5.60428	0.0277802	Not assessed	Not assessed
5298	2.13759e-55	0.61335	1.16862e-55	0.335268	0.0513828	11:62616243:G:C	ENSG00000149541_B3GAT3.6897.38.3_sun_pQTL	ENSG00000149541_B3GAT3.6897.38.3_COVID_A1_h	rs12794886	-0.346336	0.588014	-1.49882	0.806151	0.555866	Not assessed	Not assessed
5825	7.4143e-50	0.60298	4.25071e-50	0.345644	0.0513759	15:81308110:T:G	ENSG00000172349_IL16.2774.10.3_sun_pQTL	ENSG00000172349_IL16.2774.10.3_COVID_A1_h	rs4778639	0.164732	0.487377	-0.790509	1.11997	0.735366	Not assessed	Not assessed
2703	3.50999e-16	0.810841	5.96732e-17	0.137799	0.0513599	10:45290814:G:A	ENSG00000263639_MSMB.10620.21.3_sun_pQTL	ENSG00000263639_MSMB.10620.21.3_COVID_A2_h	rs7090755	0.378521	0.169734	0.0458476	0.711194	0.0257423	Not assessed	Not assessed
6962	0.0012924	0.599255	0.00074922	0.347344	0.0513589	19:53822958:G:T	ENSG00000189013_KIR2DL4.9245.1.3_sun_pQTL	ENSG00000189013_KIR2DL4.9245.1.3_COVID_A2_h	rs62143206	0.472994	0.305476	-0.125729	1.07172	0.12153	Not assessed	Not assessed
4778	1.94e-05	0.592731	1.16497e-05	0.355883	0.0513555	15:40853721:C:T	ENSG00000166145_SPINT1.2828.82.2_sun_pQTL	ENSG00000166145_SPINT1.2828.82.2_COVID_A1_h	rs17658212	-0.44715	0.863315	-2.13922	1.24492	0.604496	Not assessed	Not assessed
7189	6.1927e-18	0.639778	2.99082e-18	0.308935	0.0512868	17:74471487:A:G	ENSG00000167850_CD300C.5066.134.3_sun_pQTL	ENSG00000167850_CD300C.5066.134.3_COVID_B1_h	rs62087214	-0.165051	0.122956	-0.406039	0.0759378	0.179479	Not assessed	Not assessed
5190	0	0.41172	0	0.53702	0.0512608	3:46576229:G:A	ENSG00000241186_TDGF1.5810.25.3_sun_pQTL	ENSG00000241186_TDGF1.5810.25.3_COVID_A1_h	rs6769392	-0.182898	0.121635	-0.421297	0.055501	0.132666	Not assessed	Not assessed
5691	7.0347e-139	0.592065	4.23864e-139	0.356687	0.051248	3:113907086:C:G	ENSG00000178075_GRAMD1C.8842.16.3_sun_pQTL	ENSG00000178075_GRAMD1C.8842.16.3_COVID_A1_h	rs61077924	0.268167	0.264295	-0.249841	0.786176	0.310272	Not assessed	Not assessed
7566	1.41e-23	0.569069	9.40978e-24	0.379723	0.0512085	3:98959329:G:A	ENSG00000057019_DCBLD2.9338.2.3_sun_pQTL	ENSG00000057019_DCBLD2.9338.2.3_COVID_A1_h	rs9864010	-0.388805	0.521439	-1.41081	0.633197	0.455886	Not assessed	Not assessed
7585	5.72077e-24	0.642587	2.72675e-24	0.306231	0.0511815	4:76022794:G:A	ENSG00000169245_CXCL10.4141.79.1_sun_pQTL	ENSG00000169245_CXCL10.4141.79.1_COVID_A2_h	rs11548618	-0.0669112	0.112458	-0.287326	0.153503	0.551853	Not assessed	Not assessed
4640	0.000512166	0.595202	0.000303656	0.352836	0.0511457	1:72231244:C:T	ENSG00000172260_NEGR1.13109.82.3_sun_pQTL	ENSG00000172260_NEGR1.13109.82.3_COVID_A1_h	rs1194273	-1.72685	1.16859	-4.01724	0.563536	0.139481	Not assessed	Not assessed
3429	1.09031e-12	0.723419	3.39847e-13	0.225436	0.0511446	11:66570403:C:A	ENSG00000174080_CTSF.9212.22.3_sun_pQTL	ENSG00000174080_CTSF.9212.22.3_COVID_A1_h	rs1791679	-0.328957	0.679821	-1.66138	1.00347	0.628466	Not assessed	Not assessed
7140	4.31122e-06	0.556636	3.03853e-06	0.392264	0.0510919	17:4923297:G:T	ENSG00000185245_GP1BA.4990.87.1_sun_pQTL	ENSG00000185245_GP1BA.4990.87.1_COVID_A1_h	rs72835078	0.549009	0.714813	-0.851997	1.95002	0.442459	Not assessed	Not assessed
7046	3.99999e-07	0.637176	1.95744e-07	0.311758	0.0510656	20:63715837:G:T	ENSG00000243509_TNFRSF6B.5070.76.3_sun_pQTL	ENSG00000243509_TNFRSF6B.5070.76.3_COVID_B1_h	rs62217798	-0.582812	0.345004	-1.25901	0.0933838	0.0911639	Not assessed	Not assessed
6373	5.10164e-07	0.599725	2.97114e-07	0.349223	0.0510515	1:159706221:G:A	ENSG00000132693_CRP.4337.49.2_sun_pQTL	ENSG00000132693_CRP.4337.49.2_COVID_A1_h	rs2808628	1.03385	0.858516	-0.648815	2.71651	0.228503	Not assessed	Not assessed
5956	4.30443e-58	0.614042	2.34816e-58	0.334923	0.0510355	8:63011205:T:C	ENSG00000137563_GGH.9370.69.3_sun_pQTL	ENSG00000137563_GGH.9370.69.3_COVID_A1_h	rs10957266	-0.0544158	0.361265	-0.762482	0.65365	0.880271	Not assessed	Not assessed
22394	0.128141	0.195815	0.247245	0.37777	0.051029	6:32610813:A:G	ENSG00000204371_EHMT2.5843.60.3_sun_pQTL	ENSG00000204371_EHMT2.5843.60.3_COVID_C1_h	rs3997868	-1.25958	0.283054	-1.81436	-0.704806	8.58815e-06	Not assessed	Not assessed
7089	4.51079e-14	0.668198	1.89577e-14	0.280776	0.0510254	8:39923925:C:T	ENSG00000131203_IDO1.9759.13.3_sun_pQTL	ENSG00000131203_IDO1.9759.13.3_COVID_B1_h	rs7010461	-0.349196	0.236636	-0.812994	0.114602	0.140033	Not assessed	Not assessed
6394	2.56307e-07	0.597654	1.50694e-07	0.351335	0.051011	20:3036249:G:A	ENSG00000125787_GNRH2.10708.3.3_sun_pQTL	ENSG00000125787_GNRH2.10708.3.3_COVID_A1_h	rs3787480	0.643113	0.810196	-0.944841	2.23107	0.427327	Not assessed	Not assessed
7357	1.09299e-43	0.633793	5.43699e-44	0.315224	0.0509826	9:136213967:A:AAC	ENSG00000165661_QSOX2.8397.147.3_sun_pQTL	ENSG00000165661_QSOX2.8397.147.3_COVID_A2_h	rs77836657	0.189688	0.107576	-0.0211571	0.400533	0.0778511	Not assessed	Not assessed
5870	1.21266e-17	0.727199	3.70036e-18	0.22185	0.0509508	11:74703874:C:T	ENSG00000054938_CHRDL2.6086.15.3_sun_pQTL	ENSG00000054938_CHRDL2.6086.15.3_COVID_A2_h	rs11607100	0.132111	0.110653	-0.0847645	0.348986	0.232508	Not assessed	Not assessed
4754	0.151439	0.444761	0.0896401	0.263213	0.0509477	15:40371891:G:A	ENSG00000104129_DNAJC17.14655.1.3_sun_pQTL	ENSG00000104129_DNAJC17.14655.1.3_COVID_A1_h	rs77721109	-0.427572	1.21113	-2.80134	1.9462	0.724061	Not assessed	Not assessed
10161	0.00160232	0.463652	0.00166637	0.482137	0.0509422	22:48410574:G:A	ENSG00000219438_FAM19A5.5609.92.3_sun_pQTL	ENSG00000219438_FAM19A5.5609.92.3_COVID_A1_h	rs9615878	-1.64854	1.2466	-4.09183	0.794746	0.186024	Not assessed	Not assessed
5483	6.14245e-05	0.632493	3.07394e-05	0.316475	0.0509394	1:42155974:G:A	ENSG00000044012_GUCA2B.6223.5.3_sun_pQTL	ENSG00000044012_GUCA2B.6223.5.3_COVID_A1_h	rs3818727	-0.409195	0.95039	-2.27193	1.45354	0.666792	Not assessed	Not assessed
6209	1.11182e-56	0.579618	7.08802e-57	0.369465	0.0509172	1:107135646:G:C	ENSG00000162631_NTNG1.5637.81.3_sun_pQTL	ENSG00000162631_NTNG1.5637.81.3_COVID_A1_h	rs115668827	-0.0716082	0.359057	-0.775348	0.632131	0.841923	Not assessed	Not assessed
7619	3.81618e-16	0.606757	2.15338e-16	0.342328	0.0509154	6:160671406:C:T	ENSG00000122194_PLG.3710.49.2_sun_pQTL	ENSG00000122194_PLG.3710.49.2_COVID_B1_h	rs11751347	0.268601	0.190055	-0.103899	0.641101	0.157572	Not assessed	Not assessed
7189	2.22543e-46	0.68824	8.43662e-47	0.260862	0.0508982	2:182838608:G:A	ENSG00000162998_FRZB.13740.51.3_sun_pQTL	ENSG00000162998_FRZB.13740.51.3_COVID_D1_h	rs288326	0.115224	0.0687586	-0.0195407	0.249988	0.0937831	Not assessed	Not assessed
6476	5.19581e-58	0.740149	1.4673e-58	0.208968	0.0508828	8:63011205:T:C	ENSG00000137563_GGH.9370.69.3_sun_pQTL	ENSG00000137563_GGH.9370.69.3_COVID_D1_h	rs10957266	0.106497	0.0670495	-0.0249174	0.237912	0.11221	Not assessed	Not assessed
22877	0.0576006	0.274174	0.107191	0.510168	0.0508661	6:31928196:C:G	ENSG00000204394_VARS.13083.18.3_sun_pQTL	ENSG00000204394_VARS.13083.18.3_COVID_B1_h	rs7746553	1.32742	0.395061	0.553113	2.10173	0.000779333	Not assessed	Not assessed
7175	5.93297e-05	0.619968	3.14969e-05	0.329077	0.050864	19:47867143:G:T	ENSG00000105398_SULT2A1.9829.91.3_sun_pQTL	ENSG00000105398_SULT2A1.9829.91.3_COVID_B1_h	rs296384	-0.451943	0.300126	-1.04018	0.136292	0.132107	Not assessed	Not assessed
6703	4.1125e-59	0.576429	2.65966e-59	0.37274	0.0508315	1:168728523:A:C	ENSG00000143196_DPT.4979.34.2_sun_pQTL	ENSG00000143196_DPT.4979.34.2_COVID_A1_h	rs1018454	0.390397	0.351456	-0.298444	1.07924	0.266655	Not assessed	Not assessed
6467	5.4215e-246	0.587274	3.34138e-246	0.361897	0.050829	7:83405046:G:C	ENSG00000170381_SEMA3E.5363.51.3_sun_pQTL	ENSG00000170381_SEMA3E.5363.51.3_COVID_A1_h	rs3757607	0.160996	0.197626	-0.226343	0.548336	0.415272	Not assessed	Not assessed
6614	0.00344129	0.576333	0.00219306	0.367233	0.0507996	14:50921416:C:T	ENSG00000100504_PYGL.11441.11.3_sun_pQTL	ENSG00000100504_PYGL.11441.11.3_COVID_A1_h	rs144359893	0.464127	1.14625	-1.78249	2.71074	0.685545	Not assessed	Not assessed
8217	2.59367e-08	0.528795	2.06233e-08	0.420415	0.0507899	6:55451384:A:G	ENSG00000187871_GFRAL.6920.1.3_sun_pQTL	ENSG00000187871_GFRAL.6920.1.3_COVID_A1_h	rs12206196	1.03521	0.850044	-0.630841	2.70127	0.223286	Not assessed	Not assessed
6853	1.20345e-08	0.555494	8.53083e-09	0.393719	0.0507869	5:55032017:A:AT	ENSG00000113088_GZMK.9545.156.3_sun_pQTL	ENSG00000113088_GZMK.9545.156.3_COVID_A1_h	rs11399654	1.01715	0.949772	-0.84437	2.87867	0.284196	Not assessed	Not assessed
6756	0.000563292	0.687926	0.000213393	0.260557	0.0507403	6:132503840:G:C	ENSG00000079950_STX7.8274.64.3_sun_pQTL	ENSG00000079950_STX7.8274.64.3_COVID_B2_h	rs2842884	-0.425916	0.186805	-0.792046	-0.0597856	0.0226073	Not assessed	Not assessed
7042	0.250391	0.128742	0.376571	0.193569	0.0507265	12:108195150:A:G	ENSG00000136003_ISCU.7201.5.3_sun_pQTL	ENSG00000136003_ISCU.7201.5.3_COVID_A2_h	rs10746119	-1.75945	0.448159	-2.63783	-0.881077	8.63864e-05	Not assessed	Not assessed
4133	1.18638e-143	0.683993	4.60237e-144	0.265293	0.0507138	16:69702948:G:A	ENSG00000181019_NQO1.9837.60.3_sun_pQTL	ENSG00000181019_NQO1.9837.60.3_COVID_A1_h	rs12232410	0.120299	0.248847	-0.367431	0.608029	0.628794	Not assessed	Not assessed
7238	1.41984e-23	0.649583	6.55328e-24	0.299764	0.0506529	14:69888141:A:C	ENSG00000198732_SMOC1.13118.5.3_sun_pQTL	ENSG00000198732_SMOC1.13118.5.3_COVID_A2_h	rs1958078	-0.202818	0.126722	-0.451189	0.0455534	0.10949	Not assessed	Not assessed
5182	4.21725e-09	0.7009	1.49523e-09	0.248454	0.0506462	5:87399457:A:G	ENSG00000134480_CCNH.9848.22.3_sun_pQTL	ENSG00000134480_CCNH.9848.22.3_COVID_B1_h	rs2230641	0.41062	0.213575	-0.00797906	0.82922	0.0545297	Not assessed	Not assessed
8866	0.0813348	0.155353	0.244917	0.467753	0.0506422	21:42354303:A:G	ENSG00000160181_TFF2.9191.8.3_sun_pQTL	ENSG00000160181_TFF2.9191.8.3_COVID_A2_h	rs58206891	0.582822	0.237094	0.118126	1.04752	0.0139639	Not assessed	Not assessed
6023	2.63307e-41	0.604488	1.50249e-41	0.344883	0.0506289	3:165193499:ATCTG:A	ENSG00000121871_SLITRK3.10565.19.3_sun_pQTL	ENSG00000121871_SLITRK3.10565.19.3_COVID_A1_h	rs67318932	0.239531	0.514056	-0.768001	1.24706	0.641242	Not assessed	Not assessed
5807	0	0.614234	0	0.335174	0.0505922	1:160750284:C:T	ENSG00000026751_SLAMF7.5487.7.3_sun_pQTL	ENSG00000026751_SLAMF7.5487.7.3_COVID_A1_h	rs11581248	0.113456	0.187338	-0.253721	0.480632	0.544768	Not assessed	Not assessed
7462	0	0.573183	0	0.376285	0.050532	3:98790861:G:A	ENSG00000064225_ST3GAL6.6947.4.3_sun_pQTL	ENSG00000064225_ST3GAL6.6947.4.3_COVID_A1_h	rs72934623	-0.0851682	0.172897	-0.42404	0.253704	0.622299	Not assessed	Not assessed
5857	1.99049e-33	0.610367	1.10602e-33	0.339102	0.0505304	1:64148812:G:T	ENSG00000185483_ROR1.2590.69.4_sun_pQTL	ENSG00000185483_ROR1.2590.69.4_COVID_A1_h	rs1408416	0.351045	0.435227	-0.501984	1.20408	0.419909	Not assessed	Not assessed
7816	0.212411	0.383886	0.125832	0.227364	0.0505061	9:130371359:C:T	ENSG00000148358_GPR107.12963.1.3_sun_pQTL	ENSG00000148358_GPR107.12963.1.3_COVID_B1_h	rs977527	0.658885	0.289801	0.0908848	1.22688	0.0229916	Not assessed	Not assessed
9372	0.036205	0.462669	0.0327068	0.417914	0.0505053	13:23814451:C:T	ENSG00000127863_TNFRSF19.5131.15.3_sun_pQTL	ENSG00000127863_TNFRSF19.5131.15.3_COVID_A1_h	rs141389489	-2.06568	1.45592	-4.91922	0.787865	0.155952	Not assessed	Not assessed
5516	5.15456e-14	0.730758	1.54342e-14	0.21876	0.0504817	10:72089994:C:T	ENSG00000107742_SPOCK2.5491.12.3_sun_pQTL	ENSG00000107742_SPOCK2.5491.12.3_COVID_B2_h	rs1245540	-0.209344	0.0962735	-0.398036	-0.0206511	0.02967	Not assessed	Not assessed
5760	9.18796e-30	0.595904	5.4533e-30	0.353634	0.0504614	18:47214692:A:G	ENSG00000167220_HDHD2.13472.35.3_sun_pQTL	ENSG00000167220_HDHD2.13472.35.3_COVID_A1_h	rs75228657	-0.115962	0.421721	-0.942519	0.710595	0.783336	Not assessed	Not assessed
7370	1.27704e-12	0.682445	4.99934e-13	0.267112	0.0504431	3:148844612:G:A	ENSG00000153002_CPB1.6356.3.3_sun_pQTL	ENSG00000153002_CPB1.6356.3.3_COVID_B2_h	rs13318853	0.181288	0.0974561	-0.0097229	0.372298	0.0628577	Not assessed	Not assessed
6991	0.0012512	0.469878	0.00127079	0.477186	0.0504148	15:78255107:C:A	ENSG00000140403_DNAJA4.9744.139.3_sun_pQTL	ENSG00000140403_DNAJA4.9744.139.3_COVID_A2_h	rs11639191	0.427087	0.197452	0.0400882	0.814086	0.0305418	Not assessed	Not assessed
6148	0	0.602256	0	0.347334	0.0504105	2:102305323:T:G	ENSG00000115602_IL1RL1.4234.8.2_sun_pQTL	ENSG00000115602_IL1RL1.4234.8.2_COVID_B1_h	rs10179654	0.0800672	0.0458953	-0.00988598	0.17002	0.0810613	Not assessed	Not assessed
7316	0.0358576	0.596181	0.0180207	0.299568	0.0503725	1:236067017:G:A	ENSG00000116962_NID1.3213.65.2_sun_pQTL	ENSG00000116962_NID1.3213.65.2_COVID_B1_h	rs76183323	-0.349531	0.392771	-1.11935	0.420285	0.373513	Not assessed	Not assessed
6479	0.000924738	0.000856723	0.492054	0.455813	0.0503518	19:10355447:C:T	ENSG00000130811_EIF3G.11454.87.3_sun_pQTL	ENSG00000130811_EIF3G.11454.87.3_COVID_A2_h	rs11085727	3.44127	0.579597	2.30528	4.57726	2.89675e-09	Not assessed	Not assessed
4874	0.404077	0.256667	0.176722	0.112202	0.0503311	1:172954675:C:T	ENSG00000117601_SERPINC1.3344.60.4_sun_pQTL	ENSG00000117601_SERPINC1.3344.60.4_COVID_B1_h	rs140729295	0.155957	0.495479	-0.815163	1.12708	0.752943	Not assessed	Not assessed
5101	0.0209957	0.596354	0.0113047	0.321044	0.0503018	15:84704985:T:C	ENSG00000197696_NMB.9321.400.3_sun_pQTL	ENSG00000197696_NMB.9321.400.3_COVID_A1_h	rs12912342	1.6587	1.19123	-0.67606	3.99346	0.163792	Not assessed	Not assessed
5817	7.15634e-154	0.740238	2.02562e-154	0.209476	0.0502858	19:43174936:A:G	ENSG00000221826_PSG3.6444.15.3_sun_pQTL	ENSG00000221826_PSG3.6444.15.3_COVID_C1_h	rs2355433	0.0616097	0.031484	-9.77776e-05	0.123317	0.0503641	Not assessed	Not assessed
6597	1.00555e-06	0.579724	6.41908e-07	0.370026	0.0502484	8:102214774:T:A	ENSG00000048392_RRM2B.8925.25.3_sun_pQTL	ENSG00000048392_RRM2B.8925.25.3_COVID_A1_h	rs2387995	-1.15238	1.16586	-3.43743	1.13267	0.322938	Not assessed	Not assessed
5746	5.94307e-90	0.596625	3.51836e-90	0.353159	0.0502162	19:35739273:T:C	ENSG00000126246_IGFLR1.7244.16.3_sun_pQTL	ENSG00000126246_IGFLR1.7244.16.3_COVID_A1_h	rs12459634	-0.230698	0.300828	-0.820309	0.358914	0.443155	Not assessed	Not assessed
5658	4.12836e-08	0.615742	2.24e-08	0.334044	0.0502137	19:43306700:C:G	ENSG00000183668_PSG9.9335.28.3_sun_pQTL	ENSG00000183668_PSG9.9335.28.3_COVID_A1_h	rs2007528	0.802326	0.873499	-0.909701	2.51435	0.358347	Not assessed	Not assessed
5626	5.0354e-06	0.614409	2.74905e-06	0.335383	0.0502008	20:41212451:C:T	ENSG00000124181_PLCG1.4563.61.2_sun_pQTL	ENSG00000124181_PLCG1.4563.61.2_COVID_A1_h	rs2866372	-0.834447	0.91491	-2.62764	0.958743	0.36174	Not assessed	Not assessed
4967	0.000985102	0.760262	0.000244094	0.188332	0.0501767	12:55969882:C:A	ENSG00000185664_PMEL.6472.40.3_sun_pQTL	ENSG00000185664_PMEL.6472.40.3_COVID_D1_h	rs3213122	0.299747	0.195093	-0.0826282	0.682121	0.124433	Not assessed	Not assessed
4750	1.48e-09	0.64626	6.95346e-10	0.303581	0.0501588	1:12188885:A:G	ENSG00000028137_TNFRSF1B.8368.102.3_sun_pQTL	ENSG00000028137_TNFRSF1B.8368.102.3_COVID_A1_h	rs945439	0.497489	0.805516	-1.08129	2.07627	0.536837	Not assessed	Not assessed
5461	0.0496089	0.728057	0.0109892	0.161227	0.0501171	8:8471238:C:A	ENSG00000176782_DEFB104A.5763.67.3_sun_pQTL	ENSG00000176782_DEFB104A.5763.67.3_COVID_C1_h	rs553751473	0.266317	0.149213	-0.0261348	0.558768	0.0742917	Not assessed	Not assessed
4100	3.78951e-08	0.703913	1.32455e-08	0.24599	0.0500973	8:85438822:G:C	ENSG00000164879_CA3.3799.11.2_sun_pQTL	ENSG00000164879_CA3.3799.11.2_COVID_A1_h	rs2072696	-0.36568	0.886215	-2.10263	1.37127	0.679877	Not assessed	Not assessed
3303	1.3009e-05	0.723344	4.07575e-06	0.226576	0.0500625	1:1014863:A:C	ENSG00000187608_ISG15.14148.2.3_sun_pQTL	ENSG00000187608_ISG15.14148.2.3_COVID_A1_h	rs1891906	-0.222121	0.905889	-1.99763	1.55339	0.806304	Not assessed	Not assessed
7390	8.18383e-09	0.525671	6.60591e-09	0.424267	0.0500617	17:81231621:G:A	ENSG00000167302_ENTHD2.7947.19.3_sun_pQTL	ENSG00000167302_ENTHD2.7947.19.3_COVID_A1_h	rs61745945	0.243271	0.666332	-1.06272	1.54926	0.715044	Not assessed	Not assessed
6376	3.69567e-62	0.683285	1.44297e-62	0.266738	0.0499772	18:31633396:C:CT	ENSG00000118276_B4GALT6.10832.24.3_sun_pQTL	ENSG00000118276_B4GALT6.10832.24.3_COVID_A2_h	rs201022770	0.0888001	0.0849445	-0.0776881	0.255288	0.295843	Not assessed	Not assessed
6398	0.337685	0.299721	0.165651	0.146978	0.0499641	15:90176168:C:A	ENSG00000140522_RLBP1.12936.38.3_sun_pQTL	ENSG00000140522_RLBP1.12936.38.3_COVID_B1_h	rs6496636	-1.29921	0.479871	-2.23974	-0.358677	0.00678106	Not assessed	Not assessed
7882	3.34856e-137	0.506539	2.93217e-137	0.443501	0.0499606	10:17847614:G:A	ENSG00000260314_MRC1.2637.77.2_sun_pQTL	ENSG00000260314_MRC1.2637.77.2_COVID_A1_h	rs12359178	-0.374344	0.355546	-1.0712	0.322514	0.292401	Not assessed	Not assessed
6257	0.004319	0.589423	0.00259241	0.353742	0.049923	13:37523248:C:T	ENSG00000133110_POSTN.3457.57.1_sun_pQTL	ENSG00000133110_POSTN.3457.57.1_COVID_A1_h	rs9547925	-1.01531	1.12306	-3.21647	1.18585	0.365967	Not assessed	Not assessed
5673	1.21129e-13	0.67679	4.8922e-14	0.273294	0.0499165	1:117418549:A:T	ENSG00000198162_MAN1A2.9077.10.3_sun_pQTL	ENSG00000198162_MAN1A2.9077.10.3_COVID_B1_h	rs7512060	0.274092	0.170749	-0.0605696	0.608753	0.108442	Not assessed	Not assessed
5799	0.334262	0.37178	0.115569	0.12849	0.049899	8:35744510:G:A	ENSG00000156687_UNC5D.5140.56.3_sun_pQTL	ENSG00000156687_UNC5D.5140.56.3_COVID_A2_h	rs6998947	-0.702634	0.239887	-1.1728	-0.232463	0.00340036	Not assessed	Not assessed
5536	3.48893e-51	0.604301	1.99677e-51	0.345802	0.0498971	2:143043636:C:A	ENSG00000115919_KYNU.4559.64.2_sun_pQTL	ENSG00000115919_KYNU.4559.64.2_COVID_A1_h	rs73961713	-0.423792	0.44945	-1.3047	0.457114	0.345726	Not assessed	Not assessed
5064	1.98934e-54	0.623261	1.04346e-54	0.326865	0.049874	20:38340105:T:C	ENSG00000101425_BPI.4126.22.1_sun_pQTL	ENSG00000101425_BPI.4126.22.1_COVID_A1_h	rs77603326	0.0601808	0.380723	-0.686023	0.806385	0.874402	Not assessed	Not assessed
7222	6.33836e-15	0.679134	2.53002e-15	0.271033	0.0498328	19:49013883:C:T	ENSG00000104826_LHB.8376.25.4_sun_pQTL	ENSG00000104826_LHB.8376.25.4_COVID_B2_h	rs75287599	0.165138	0.091877	-0.0149375	0.345214	0.0722748	Not assessed	Not assessed
5470	0.00334586	0.686384	0.00126382	0.259215	0.0497907	22:29150904:C:T	ENSG00000183762_KREMEN1.6512.68.3_sun_pQTL	ENSG00000183762_KREMEN1.6512.68.3_COVID_D1_h	rs74663246	0.159664	0.17442	-0.182193	0.501521	0.359982	Not assessed	Not assessed
6963	1.41352e-92	0.580589	9.00051e-93	0.369637	0.0497741	4:75927078:C:T	ENSG00000138744_NAAA.3173.49.2_sun_pQTL	ENSG00000138744_NAAA.3173.49.2_COVID_A1_h	rs9996608	0.290356	0.288733	-0.275551	0.856262	0.314599	Not assessed	Not assessed
6307	1.14086e-05	0.680721	4.51777e-06	0.269514	0.0497494	7:134450869:T:C	ENSG00000085662_AKR1B1.9854.36.3_sun_pQTL	ENSG00000085662_AKR1B1.9854.36.3_COVID_B1_h	rs2229542	0.109827	0.232014	-0.344913	0.564566	0.635955	Not assessed	Not assessed
5820	0.25569	0.12646	0.380152	0.187967	0.0497315	1:113196535:G:C	ENSG00000184599_FAM19A3.7839.99.3_sun_pQTL	ENSG00000184599_FAM19A3.7839.99.3_COVID_A2_h	rs72685641	-1.28937	0.41443	-2.10164	-0.477101	0.00186337	Not assessed	Not assessed
8487	1.2954e-19	0.523744	1.0551e-19	0.42654	0.0497163	12:129601019:AG:A	ENSG00000151952_TMEM132D.13416.8.3_sun_pQTL	ENSG00000151952_TMEM132D.13416.8.3_COVID_A1_h	rs139574809	0.184988	0.677726	-1.14333	1.51331	0.784888	Not assessed	Not assessed
4865	0.131758	0.520477	0.0602271	0.237862	0.049675	9:34593088:G:A	ENSG00000122756_CNTFR.2711.6.2_sun_pQTL	ENSG00000122756_CNTFR.2711.6.2_COVID_A1_h	rs10972159	-0.279117	0.97578	-2.19161	1.63338	0.774844	Not assessed	Not assessed
6347	9.30481e-180	0.601667	5.39302e-180	0.348674	0.0496587	20:24919270:C:T	ENSG00000077984_CST7.3302.58.1_sun_pQTL	ENSG00000077984_CST7.3302.58.1_COVID_A1_h	rs2387362	0.115428	0.370113	-0.609981	0.840837	0.755138	Not assessed	Not assessed
7685	0.0018764	0.557642	0.00131087	0.389523	0.0496478	16:75582072:C:G	ENSG00000034713_GABARAPL2.12494.99.3_sun_pQTL	ENSG00000034713_GABARAPL2.12494.99.3_COVID_A1_h	rs12449192	0.177852	1.05597	-1.89181	2.24752	0.866249	Not assessed	Not assessed
7550	6.60999e-27	0.507922	5.75834e-27	0.442431	0.0496474	21:45510178:G:A	ENSG00000182871_COL18A1.2201.17.6_sun_pQTL	ENSG00000182871_COL18A1.2201.17.6_COVID_A1_h	rs144147445	0.263723	0.641113	-0.992835	1.52028	0.680814	Not assessed	Not assessed
5629	2.20525e-63	0.622297	1.16279e-63	0.328076	0.0496269	6:35783795:G:A	ENSG00000137392_CLPS.5749.53.3_sun_pQTL	ENSG00000137392_CLPS.5749.53.3_COVID_A1_h	rs9380534	0.126501	0.529133	-0.910581	1.16358	0.811049	Not assessed	Not assessed
7551	0	0.556582	0	0.39381	0.0496072	19:51225221:C:T	ENSG00000105383_CD33.3166.92.1_sun_pQTL	ENSG00000105383_CD33.3166.92.1_COVID_A1_h	rs12459419	0.182991	0.169479	-0.149181	0.515163	0.280264	Not assessed	Not assessed
10133	0.282113	0.254722	0.217361	0.196207	0.0495968	22:49847769:G:A	ENSG00000100425_BRD1.11607.15.3_sun_pQTL	ENSG00000100425_BRD1.11607.15.3_COVID_B1_h	rs112941617	-1.10429	0.335049	-1.76097	-0.447605	0.000981054	Not assessed	Not assessed
7793	8.27829e-65	0.749632	2.21777e-65	0.200778	0.0495904	12:94220122:G:A	ENSG00000136040_PLXNC1.4564.2.2_sun_pQTL	ENSG00000136040_PLXNC1.4564.2.2_COVID_C2_h	rs115651556	-0.0377232	0.0278673	-0.0923421	0.0168957	0.175841	Not assessed	Not assessed
5941	0.230879	0.24171	0.233467	0.24437	0.0495751	1:192541207:T:G	ENSG00000150681_RGS18.13982.33.3_sun_pQTL	ENSG00000150681_RGS18.13982.33.3_COVID_C2_h	rs74760329	-1.07161	0.245816	-1.5534	-0.589817	1.30427e-05	Not assessed	Not assessed
8180	0.000429793	0.528471	0.000342589	0.421196	0.0495612	21:40688572:T:C	ENSG00000171587_DSCAM.9175.48.3_sun_pQTL	ENSG00000171587_DSCAM.9175.48.3_COVID_A1_h	rs78111814	0.671943	0.800666	-0.897333	2.24122	0.40134	Not assessed	Not assessed
5576	0	0.610652	0	0.339795	0.0495529	22:17188416:T:C	ENSG00000093072_CECR1.6077.63.3_sun_pQTL	ENSG00000093072_CECR1.6077.63.3_COVID_A1_h	rs2231495	0.167899	0.179054	-0.183041	0.518838	0.348399	Not assessed	Not assessed
5675	2.26218e-27	0.599234	1.3261e-27	0.351225	0.0495411	21:44249719:G:A	ENSG00000160223_ICOSLG.9303.9.3_sun_pQTL	ENSG00000160223_ICOSLG.9303.9.3_COVID_A1_h	rs8129767	0.467577	0.79707	-1.09465	2.02981	0.557459	Not assessed	Not assessed
3304	1.49669e-18	0.723727	4.6905e-19	0.22676	0.0495127	1:1014863:A:C	ENSG00000187608_ISG15.14151.4.3_sun_pQTL	ENSG00000187608_ISG15.14151.4.3_COVID_A1_h	rs1891906	-0.142596	0.581559	-1.28243	0.997238	0.806304	Not assessed	Not assessed
6314	0.0687176	0.514797	0.0432298	0.323806	0.0494497	11:130048612:A:G	ENSG00000084234_APLP2.7915.31.3_sun_pQTL	ENSG00000084234_APLP2.7915.31.3_COVID_A1_h	rs56277866	-0.689861	1.2436	-3.12727	1.74755	0.57908	Not assessed	Not assessed
5741	1.69198e-28	0.591049	1.02931e-28	0.359512	0.0494392	9:34356361:C:T	ENSG00000164976_KIAA1161.8068.43.3_sun_pQTL	ENSG00000164976_KIAA1161.8068.43.3_COVID_D1_h	rs10972076	-0.160276	0.0881311	-0.33301	0.012458	0.0689714	Not assessed	Not assessed
6482	1.54908e-84	0.668964	6.52307e-85	0.281647	0.0493893	19:43324554:A:G	ENSG00000204936_CD177.13116.25.3_sun_pQTL	ENSG00000204936_CD177.13116.25.3_COVID_A2_h	rs144661431	-0.0747353	0.0897311	-0.250605	0.101134	0.404912	Not assessed	Not assessed
5012	8.69017e-71	0.62708	4.48445e-71	0.323547	0.0493728	1:207268263:G:A	ENSG00000196352_CD55.5069.9.3_sun_pQTL	ENSG00000196352_CD55.5069.9.3_COVID_A1_h	rs11582249	-0.268743	0.313151	-0.882507	0.345022	0.390788	Not assessed	Not assessed
5054	0	0.776898	0	0.173761	0.0493414	2:277003:A:G	ENSG00000143727_ACP1.3858.5.1_sun_pQTL	ENSG00000143727_ACP1.3858.5.1_COVID_D1_h	rs79716074	0.0420299	0.023715	-0.00445065	0.0885104	0.0763462	Not assessed	Not assessed
4843	0.0745964	0.0303593	0.60112	0.244595	0.0493295	22:19588430:A:G	ENSG00000070413_DGCR2.8055.33.3_sun_pQTL	ENSG00000070413_DGCR2.8055.33.3_COVID_B2_h	rs737857	2.32809	0.481587	1.3842	3.27199	1.33672e-06	Not assessed	Not assessed
6730	1.45005e-07	0.513808	1.23312e-07	0.436891	0.0493005	20:55872891:C:T	ENSG00000054803_CBLN4.5688.65.3_sun_pQTL	ENSG00000054803_CBLN4.5688.65.3_COVID_A1_h	rs74447607	-0.807809	0.809417	-2.39424	0.778619	0.318273	Not assessed	Not assessed
7296	0.322624	0.220447	0.242196	0.165442	0.0492921	19:2899770:T:C	ENSG00000220008_LINGO3.10827.67.3_sun_pQTL	ENSG00000220008_LINGO3.10827.67.3_COVID_D1_h	rs59264645	3.16569	0.793929	1.60962	4.72176	6.68078e-05	Not assessed	Not assessed
6197	0.000817743	0.613408	0.00044804	0.336036	0.0492908	8:88310676:G:A	ENSG00000156103_MMP16.9719.145.3_sun_pQTL	ENSG00000156103_MMP16.9719.145.3_COVID_A1_h	rs3851539	-0.808521	1.0638	-2.89354	1.2765	0.447238	Not assessed	Not assessed
6513	1.0203e-42	0.66673	4.34659e-43	0.283984	0.0492866	20:58997654:A:G	ENSG00000101160_CTSZ.4971.1.1_sun_pQTL	ENSG00000101160_CTSZ.4971.1.1_COVID_B2_h	rs199825459	-0.0477329	0.0833296	-0.211056	0.11559	0.566766	Not assessed	Not assessed
5553	0.135899	0.487293	0.0714431	0.256125	0.0492412	19:11447460:G:A	ENSG00000130175_PRKCSH.5687.5.3_sun_pQTL	ENSG00000130175_PRKCSH.5687.5.3_COVID_A1_h	rs11557488	-1.61805	1.22055	-4.0103	0.77419	0.184949	Not assessed	Not assessed
5704	1.2113e-06	0.419198	1.5362e-06	0.531584	0.0492154	19:533552:C:A	ENSG00000197540_GZMM.5704.74.3_sun_pQTL	ENSG00000197540_GZMM.5704.74.3_COVID_A2_h	rs12979110	0.386927	0.215578	-0.0355986	0.809453	0.0726803	Not assessed	Not assessed
6405	0.000472133	0.70798	0.000161549	0.2422	0.049186	19:44804951:G:A	ENSG00000187244_BCAM.2816.50.2_sun_pQTL	ENSG00000187244_BCAM.2816.50.2_COVID_B2_h	rs144579705	-0.0107063	0.169138	-0.342211	0.320798	0.949528	Not assessed	Not assessed
7147	3.75111e-100	0.549104	2.7446e-100	0.401716	0.0491798	19:8056212:G:A	ENSG00000131142_CCL25.2705.5.2_sun_pQTL	ENSG00000131142_CCL25.2705.5.2_COVID_A1_h	rs74959615	-0.21739	0.27588	-0.758105	0.323324	0.430703	Not assessed	Not assessed
4084	0.18766	0.499323	0.072085	0.191753	0.0491788	20:33482180:G:A	ENSG00000149600_COMMD7.2823.7.1_sun_pQTL	ENSG00000149600_COMMD7.2823.7.1_COVID_A1_h	rs75399011	2.48401	1.78392	-1.0124	5.98042	0.163786	Not assessed	Not assessed
8441	5.70256e-41	0.513466	4.85815e-41	0.437384	0.0491499	21:41346335:C:T	ENSG00000183844_FAM3B.5618.50.3_sun_pQTL	ENSG00000183844_FAM3B.5618.50.3_COVID_A1_h	rs57529409	0.360894	0.392711	-0.408805	1.13059	0.358106	Not assessed	Not assessed
5335	0.0269832	0.622801	0.0125044	0.288566	0.0491454	7:107857797:A:G	ENSG00000091140_DLD.10025.1.3_sun_pQTL	ENSG00000091140_DLD.10025.1.3_COVID_A1_h	rs10215427	1.52654	1.26327	-0.949424	4.00251	0.226892	Not assessed	Not assessed
7482	5.22678e-223	0.556027	3.71225e-223	0.394862	0.0491118	15:78942615:G:A	ENSG00000103811_CTSH.8465.52.3_sun_pQTL	ENSG00000103811_CTSH.8465.52.3_COVID_B2_h	rs34593439	-0.0557367	0.0303191	-0.115161	0.00368763	0.0660128	Not assessed	Not assessed
7537	4.57867e-06	0.541477	3.46244e-06	0.409421	0.049094	16:1400495:G:A	ENSG00000090581_GNPTG.10666.7.3_sun_pQTL	ENSG00000090581_GNPTG.10666.7.3_COVID_A1_h	rs12599336	0.462266	1.10466	-1.70283	2.62736	0.675604	Not assessed	Not assessed
6654	1.79404e-06	0.593915	1.0789e-06	0.357121	0.0489604	12:28154784:C:T	ENSG00000087494_PTHLH.2962.50.2_sun_pQTL	ENSG00000087494_PTHLH.2962.50.2_COVID_A1_h	rs10843115	-0.846509	0.854135	-2.52058	0.827565	0.321651	Not assessed	Not assessed
5421	0.00335882	0.68714	0.00126792	0.259339	0.0488945	22:29150904:C:T	ENSG00000183762_KREMEN1.6512.68.3_sun_pQTL	ENSG00000183762_KREMEN1.6512.68.3_COVID_B1_h	rs74663246	0.206042	0.354562	-0.488886	0.900969	0.561162	Not assessed	Not assessed
7163	0.0385404	0.650405	0.0146686	0.247497	0.0488884	1:236067017:G:A	ENSG00000116962_NID1.3213.65.2_sun_pQTL	ENSG00000116962_NID1.3213.65.2_COVID_B2_h	rs76183323	0.0316171	0.245536	-0.449625	0.512859	0.897542	Not assessed	Not assessed
6805	3.85172e-52	0.569535	2.58107e-52	0.381601	0.0488642	5:157039767:T:C	ENSG00000113249_HAVCR1.9021.1.3_sun_pQTL	ENSG00000113249_HAVCR1.9021.1.3_COVID_A1_h	rs6889164	-0.312333	0.406108	-1.10829	0.483624	0.441841	Not assessed	Not assessed
7312	0.00929724	0.673343	0.003658	0.264878	0.048823	11:124660768:T:C	ENSG00000110013_SIAE.9263.57.3_sun_pQTL	ENSG00000110013_SIAE.9263.57.3_COVID_B2_h	rs78778622	-0.279671	0.198385	-0.668498	0.109157	0.158618	Not assessed	Not assessed
6312	8.67798e-63	0.59334	5.2344e-63	0.357843	0.0488163	2:178448955:G:C	ENSG00000079150_FKBP7.9288.7.3_sun_pQTL	ENSG00000079150_FKBP7.9288.7.3_COVID_A1_h	rs13382684	0.191632	0.349237	-0.492859	0.876124	0.5832	Not assessed	Not assessed
5357	8.83342e-32	0.640689	4.28169e-32	0.310503	0.0488085	14:30861207:G:A	ENSG00000100473_COCH.7227.75.3_sun_pQTL	ENSG00000100473_COCH.7227.75.3_COVID_A1_h	rs34907608	0.157275	0.458815	-0.741986	1.05654	0.731761	Not assessed	Not assessed
7167	2.89985e-07	0.712993	9.69244e-08	0.238262	0.0487446	20:3041120:T:A	ENSG00000125787_GNRH2.10708.3.3_sun_pQTL	ENSG00000125787_GNRH2.10708.3.3_COVID_C2_h	rs6084237	0.356894	0.119309	0.123053	0.590735	0.0027775	Not assessed	Not assessed
5520	0.0340876	0.573994	0.0192411	0.323948	0.0487299	2:21036740:A:G	ENSG00000084674_APOB.2797.56.2_sun_pQTL	ENSG00000084674_APOB.2797.56.2_COVID_A1_h	rs520354	-1.36792	1.12917	-3.58105	0.845201	0.225724	Not assessed	Not assessed
7046	7.92308e-23	0.561217	5.50744e-23	0.39006	0.0487231	7:23587668:C:T	ENSG00000169193_CCDC126.6388.21.3_sun_pQTL	ENSG00000169193_CCDC126.6388.21.3_COVID_A1_h	rs227934	0.677083	0.571044	-0.442143	1.79631	0.235744	Not assessed	Not assessed
7635	3.18575e-09	0.547002	2.35486e-09	0.404288	0.0487103	10:80434508:G:A	ENSG00000122378_FAM213A.13423.94.3_sun_pQTL	ENSG00000122378_FAM213A.13423.94.3_COVID_A1_h	rs10887868	0.884141	0.797339	-0.678615	2.4469	0.267489	Not assessed	Not assessed
5926	7.88922e-16	0.606237	4.49179e-16	0.345117	0.0486464	6:36130414:C:A	ENSG00000156711_MAPK13.5006.71.1_sun_pQTL	ENSG00000156711_MAPK13.5006.71.1_COVID_A1_h	rs12210904	0.853073	1.00926	-1.12504	2.83119	0.397973	Not assessed	Not assessed
5230	0.364234	0.357279	0.116055	0.113791	0.048641	4:73580941:C:T	ENSG00000163734_CXCL3.CXCL2.3148.49.1_sun_pQTL	ENSG00000163734_CXCL3.CXCL2.3148.49.1_COVID_C1_h	rs7434831	1.26293	0.335136	0.606074	1.91978	0.000164293	Not assessed	Not assessed
5721	0.0126453	0.666041	0.00508142	0.267594	0.0486384	1:113947147:A:C	ENSG00000116774_OLFML3.8660.5.3_sun_pQTL	ENSG00000116774_OLFML3.8660.5.3_COVID_B1_h	rs4381184	0.702682	0.378648	-0.0394553	1.44482	0.0634872	Not assessed	Not assessed
5306	5.09698e-74	0.593709	3.07088e-74	0.357655	0.0486357	14:74020818:G:A	ENSG00000187097_ENTPD5.4437.56.3_sun_pQTL	ENSG00000187097_ENTPD5.4437.56.3_COVID_A1_h	rs57731447	0.0317336	0.290608	-0.537848	0.601315	0.913046	Not assessed	Not assessed
6669	9.68927e-43	0.581068	6.17567e-43	0.370307	0.0486249	20:58997654:A:G	ENSG00000101160_CTSZ.4971.1.1_sun_pQTL	ENSG00000101160_CTSZ.4971.1.1_COVID_B1_h	rs199825459	0.0386402	0.132828	-0.221698	0.298978	0.771125	Not assessed	Not assessed
4809	0.0198324	0.714673	0.00585868	0.211073	0.0485626	8:85533122:C:G	ENSG00000133742_CA1.4969.2.1_sun_pQTL	ENSG00000133742_CA1.4969.2.1_COVID_A2_h	rs147156208	-0.0523103	0.171988	-0.3894	0.284779	0.761012	Not assessed	Not assessed
12037	0.262586	0.301692	0.180193	0.206981	0.0485479	8:7084387:G:A	ENSG00000091879_ANGPT2.13660.76.3_sun_pQTL	ENSG00000091879_ANGPT2.13660.76.3_COVID_B2_h	rs71509235	0.716425	0.267763	0.191619	1.24123	0.00745976	Not assessed	Not assessed
7131	1.6447e-32	0.576302	1.07086e-32	0.37518	0.0485186	12:104587879:A:G	ENSG00000171310_CHST11.7779.86.3_sun_pQTL	ENSG00000171310_CHST11.7779.86.3_COVID_A1_h	rs1650132	-0.522208	0.585827	-1.67041	0.625992	0.372713	Not assessed	Not assessed
3335	3.42575e-15	0.725824	1.06535e-15	0.225671	0.0485044	17:19742625:A:C	ENSG00000108602_ALDH3A1.11480.1.3_sun_pQTL	ENSG00000108602_ALDH3A1.11480.1.3_COVID_A1_h	rs887241	-0.0766336	0.65254	-1.35559	1.20232	0.906512	Not assessed	Not assessed
4284	1.24986e-91	0.638819	6.1185e-92	0.312677	0.0485041	17:36008654:C:T	ENSG00000276409_CCL14.2900.53.3_sun_pQTL	ENSG00000276409_CCL14.2900.53.3_COVID_A1_h	rs7222922	-0.0908082	0.276469	-0.632678	0.451061	0.742566	Not assessed	Not assessed
6982	3.307e-149	0.572848	2.18632e-149	0.378673	0.0484784	6:160073377:A:G	ENSG00000197081_IGF2R.3676.15.3_sun_pQTL	ENSG00000197081_IGF2R.3676.15.3_COVID_A1_h	rs629849	-0.184998	0.2621	-0.698704	0.328708	0.480294	Not assessed	Not assessed
7883	8.02466e-18	0.640613	3.89525e-18	0.310911	0.0484759	11:117201809:C:T	ENSG00000160613_PCSK7.4459.68.2_sun_pQTL	ENSG00000160613_PCSK7.4459.68.2_COVID_A2_h	rs488962	-0.20026	0.139236	-0.473159	0.072638	0.150356	Not assessed	Not assessed
5392	2.99081e-05	0.63434	1.49603e-05	0.317254	0.0483612	1:223824215:C:G	ENSG00000162909_CAPN2.14684.17.3_sun_pQTL	ENSG00000162909_CAPN2.14684.17.3_COVID_A1_h	rs11806886	0.423342	0.969045	-1.47595	2.32264	0.662209	Not assessed	Not assessed
6350	5.8251e-26	0.659232	2.58426e-26	0.292415	0.0483526	1:193105381:A:G	ENSG00000023572_GLRX2.12486.8.3_sun_pQTL	ENSG00000023572_GLRX2.12486.8.3_COVID_B1_h	rs148212596	-0.0961308	0.139731	-0.369999	0.177738	0.491473	Not assessed	Not assessed
8099	2.64019e-28	0.563448	1.8193e-28	0.388212	0.0483398	14:94284149:T:C	ENSG00000140093_SERPINA10.6583.67.3_sun_pQTL	ENSG00000140093_SERPINA10.6583.67.3_COVID_B1_h	rs2232710	-0.108809	0.130801	-0.365175	0.147557	0.405485	Not assessed	Not assessed
6921	1.77483e-40	0.657995	7.92305e-41	0.293689	0.0483165	6:36871822:C:G	ENSG00000137168_PPIL1.9884.8.3_sun_pQTL	ENSG00000137168_PPIL1.9884.8.3_COVID_A2_h	rs12194408	0.0964467	0.0817749	-0.0638291	0.256722	0.238232	Not assessed	Not assessed
6344	0	0.582427	0	0.369283	0.04829	1:161509955:A:G	ENSG00000143226_FCGR2A.3309.2.2_sun_pQTL	ENSG00000143226_FCGR2A.3309.2.2_COVID_A1_h	rs1801274	0.119106	0.114529	-0.105367	0.343578	0.298358	Not assessed	Not assessed
6441	0.131401	0.527785	0.0583385	0.234274	0.0482012	11:72251180:A:AT	ENSG00000184276_DEFB108B.5611.56.3_sun_pQTL	ENSG00000184276_DEFB108B.5611.56.3_COVID_B1_h	rs200445500	-0.893652	0.407919	-1.69316	-0.0941449	0.0284694	Not assessed	Not assessed
6626	4.90758e-14	0.578737	3.16399e-14	0.373072	0.0481914	11:82853252:T:G	ENSG00000137509_PRCP.5722.78.3_sun_pQTL	ENSG00000137509_PRCP.5722.78.3_COVID_A1_h	rs2229437	-0.555292	0.659244	-1.84739	0.736802	0.399611	Not assessed	Not assessed
7947	1.02749e-08	0.662098	4.49712e-09	0.289738	0.0481636	17:81231621:G:A	ENSG00000167302_ENTHD2.7947.19.3_sun_pQTL	ENSG00000167302_ENTHD2.7947.19.3_COVID_D1_h	rs61745945	0.133417	0.134466	-0.130132	0.396966	0.321102	Not assessed	Not assessed
3784	0	0.707441	0	0.244446	0.0481135	17:28367840:G:A	ENSG00000109072_VTN.13125.45.3_sun_pQTL	ENSG00000109072_VTN.13125.45.3_COVID_A1_h	rs704	-0.0754373	0.162493	-0.393917	0.243042	0.642468	Not assessed	Not assessed
7542	1.24045e-08	0.72578	3.86561e-09	0.226127	0.0480932	11:124756673:G:A	ENSG00000149564_ESAM.7841.84.3_sun_pQTL	ENSG00000149564_ESAM.7841.84.3_COVID_C1_h	rs61753651	0.00693866	0.0988595	-0.186822	0.2007	0.944045	Not assessed	Not assessed
5453	9.86039e-06	0.612453	5.46582e-06	0.339447	0.0480845	17:51135505:A:G	ENSG00000243678_NME2.4249.64.2_sun_pQTL	ENSG00000243678_NME2.4249.64.2_COVID_A1_h	rs6504695	-1.08066	0.919274	-2.88241	0.721081	0.23977	Not assessed	Not assessed
5699	1.82054e-30	0.611915	1.01182e-30	0.340043	0.0480416	12:7097267:A:G	ENSG00000139178_C1RL.9348.1.3_sun_pQTL	ENSG00000139178_C1RL.9348.1.3_COVID_A1_h	rs11613834	0.439452	0.514075	-0.568116	1.44702	0.392639	Not assessed	Not assessed
7254	1.25839e-08	0.4952	1.16085e-08	0.45677	0.0480306	12:10376297:T:TAACA	ENSG00000213809_KLRK1.3056.11.1_sun_pQTL	ENSG00000213809_KLRK1.3056.11.1_COVID_A2_h	rs35866334	-0.438429	0.197151	-0.824837	-0.0520204	0.0261602	Not assessed	Not assessed
5417	2.09541e-15	0.603952	1.20763e-15	0.348023	0.0480246	22:20422683:AACC:A	ENSG00000244486_SCARF2.8956.96.3_sun_pQTL	ENSG00000244486_SCARF2.8956.96.3_COVID_A1_h	rs10606665	1.08645	0.867745	-0.614298	2.7872	0.210556	Not assessed	Not assessed
7074	0.0287428	0.545511	0.0189102	0.358851	0.0479849	3:195572021:T:C	ENSG00000189058_APOD.8262.20.3_sun_pQTL	ENSG00000189058_APOD.8262.20.3_COVID_A1_h	rs139828053	-0.305167	1.02156	-2.30738	1.69704	0.765147	Not assessed	Not assessed
4905	0.204191	0.407738	0.113506	0.226605	0.0479593	8:8470568:G:T	ENSG00000176782_DEFB104A.5763.67.3_sun_pQTL	ENSG00000176782_DEFB104A.5763.67.3_COVID_A1_h	rs62498737	3.06657	1.55617	0.0165278	6.11661	0.0487714	Not assessed	Not assessed
7426	0.0351717	0.628491	0.0152869	0.273117	0.0479338	6:148754255:C:T	ENSG00000111962_UST.8364.74.3_sun_pQTL	ENSG00000111962_UST.8364.74.3_COVID_D1_h	rs184021971	0.343702	0.237665	-0.122113	0.809517	0.148132	Not assessed	Not assessed
6546	0.00109653	0.586193	0.000681168	0.364098	0.047931	19:53822958:G:T	ENSG00000189013_KIR2DL4.9245.1.3_sun_pQTL	ENSG00000189013_KIR2DL4.9245.1.3_COVID_A1_h	rs62143206	0.792824	1.12341	-1.40902	2.99467	0.480357	Not assessed	Not assessed
5773	0.293628	0.315825	0.16511	0.177544	0.0478932	22:39361651:C:T	ENSG00000239713_APOBEC3G.13930.3.3_sun_pQTL	ENSG00000239713_APOBEC3G.13930.3.3_COVID_B1_h	rs9607639	1.11985	0.378246	0.378497	1.8612	0.00307015	Not assessed	Not assessed
6959	6.2241e-246	0.671508	2.6013e-246	0.280602	0.0478897	7:83405046:G:C	ENSG00000170381_SEMA3E.5363.51.3_sun_pQTL	ENSG00000170381_SEMA3E.5363.51.3_COVID_D1_h	rs3757607	-0.0571233	0.0351232	-0.125963	0.0117168	0.10387	Not assessed	Not assessed
6741	1.18811e-50	0.578936	7.65964e-51	0.373187	0.0478767	1:180194255:A:G	ENSG00000116260_QSOX1.6217.23.3_sun_pQTL	ENSG00000116260_QSOX1.6217.23.3_COVID_A1_h	rs12371	0.137618	0.394725	-0.636028	0.911265	0.727357	Not assessed	Not assessed
7785	4.53159e-52	0.671327	1.89582e-52	0.280806	0.0478668	5:157039767:T:C	ENSG00000113249_HAVCR1.9021.1.3_sun_pQTL	ENSG00000113249_HAVCR1.9021.1.3_COVID_B2_h	rs6889164	-0.128499	0.067618	-0.261028	0.00402998	0.0573853	Not assessed	Not assessed
6965	6.21241e-43	0.494429	5.75169e-43	0.457714	0.0478575	8:56964017:T:C	ENSG00000104331_IMPAD1.9231.23.3_sun_pQTL	ENSG00000104331_IMPAD1.9231.23.3_COVID_A1_h	rs112433249	-0.198434	0.440244	-1.0613	0.664429	0.65218	Not assessed	Not assessed
5590	0.019286	0.612416	0.00978508	0.310673	0.0478397	2:102115855:G:C	ENSG00000115594_IL1R1.2991.9.2_sun_pQTL	ENSG00000115594_IL1R1.2991.9.2_COVID_A1_h	rs10208542	0.515135	1.23871	-1.9127	2.94297	0.677511	Not assessed	Not assessed
7399	1.91325e-07	0.557103	1.35692e-07	0.395061	0.0478355	19:54315769:A:C	ENSG00000187116_LILRA5.8766.29.3_sun_pQTL	ENSG00000187116_LILRA5.8766.29.3_COVID_A1_h	rs1645784	-0.651985	0.878152	-2.37313	1.06916	0.457815	Not assessed	Not assessed
6462	9.7367e-07	0.593882	5.87501e-07	0.358293	0.0478229	3:116387976:T:C	ENSG00000185565_LSAMP.2999.6.2_sun_pQTL	ENSG00000185565_LSAMP.2999.6.2_COVID_A1_h	rs2116308	-0.765367	0.757454	-2.24995	0.719216	0.312281	Not assessed	Not assessed
3529	1.92768e-06	0.707197	6.67893e-07	0.244979	0.0478214	16:28503533:G:T	ENSG00000197272_IL27.EBI3.2829.19.2_sun_pQTL	ENSG00000197272_IL27.EBI3.2829.19.2_COVID_A1_h	rs181209	-0.0565782	0.942565	-1.90397	1.79082	0.952135	Not assessed	Not assessed
7362	1.50091e-47	0.541803	1.137e-47	0.41039	0.0478066	9:110549951:G:C	ENSG00000165124_SVEP1.11178.21.3_sun_pQTL	ENSG00000165124_SVEP1.11178.21.3_COVID_A1_h	rs61751937	-0.0623216	0.309929	-0.669772	0.545128	0.840633	Not assessed	Not assessed
7358	3.02207e-36	0.541752	2.28987e-36	0.410446	0.0478021	9:110549951:G:C	ENSG00000165124_SVEP1.11109.56.3_sun_pQTL	ENSG00000165124_SVEP1.11109.56.3_COVID_A1_h	rs61751937	-0.0699517	0.347874	-0.751773	0.611869	0.840633	Not assessed	Not assessed
5855	0.222605	0.523838	0.0613871	0.14441	0.0477599	17:50100544:G:C	ENSG00000108821_COL1A1.11140.56.3_sun_pQTL	ENSG00000108821_COL1A1.11140.56.3_COVID_C2_h	rs12452327	-0.400868	0.124155	-0.644207	-0.157528	0.00124326	Not assessed	Not assessed
7062	2.81669e-14	0.553396	2.0304e-14	0.398867	0.0477374	16:57410090:T:G	ENSG00000102970_CCL17.3519.3.2_sun_pQTL	ENSG00000102970_CCL17.3519.3.2_COVID_A1_h	rs16956811	0.379686	0.610852	-0.817562	1.57693	0.534226	Not assessed	Not assessed
5272	0	0.608842	0	0.343449	0.0477095	1:203181771:C:G	ENSG00000133048_CHI3L1.11104.13.3_sun_pQTL	ENSG00000133048_CHI3L1.11104.13.3_COVID_A1_h	rs35405821	0.131963	0.139487	-0.141426	0.405352	0.344119	Not assessed	Not assessed
6431	5.34027e-15	0.571549	3.55795e-15	0.380746	0.0477056	19:49013883:C:T	ENSG00000104826_LHB.8376.25.4_sun_pQTL	ENSG00000104826_LHB.8376.25.4_COVID_A1_h	rs75287599	0.262667	0.626324	-0.964906	1.49024	0.674939	Not assessed	Not assessed
6349	1.16997e-86	0.675868	4.78637e-87	0.27645	0.0476819	19:43321342:G:C	ENSG00000204936_CD177.13116.25.3_sun_pQTL	ENSG00000204936_CD177.13116.25.3_COVID_D1_h	rs73554000	0.0593223	0.0831355	-0.10362	0.222265	0.475498	Not assessed	Not assessed
5847	1.77033e-29	0.609902	9.94142e-30	0.342448	0.0476507	20:45151322:T:C	ENSG00000124102_PI3.4982.54.1_sun_pQTL	ENSG00000124102_PI3.4982.54.1_COVID_A1_h	rs16989763	-0.393078	0.489989	-1.35344	0.567284	0.422427	Not assessed	Not assessed
5964	0.00105315	0.611252	0.000584987	0.339482	0.0476282	12:86030408:A:T	ENSG00000182050_MGAT4C.7208.60.3_sun_pQTL	ENSG00000182050_MGAT4C.7208.60.3_COVID_A1_h	rs56036149	-0.142197	1.0667	-2.23288	1.94849	0.893952	Not assessed	Not assessed
9225	1.84613e-290	0.554807	1.32308e-290	0.39757	0.047623	19:51627384:T:A	ENSG00000254415_SIGLEC14.8248.222.3_sun_pQTL	ENSG00000254415_SIGLEC14.8248.222.3_COVID_B1_h	rs1106476	0.0819131	0.0544823	-0.0248703	0.188696	0.132715	Not assessed	Not assessed
6571	2.44373e-06	0.57315	1.61726e-06	0.379262	0.047584	9:91929098:C:T	ENSG00000169071_ROR2.7861.9.3_sun_pQTL	ENSG00000169071_ROR2.7861.9.3_COVID_A1_h	rs10118792	0.639135	0.933675	-1.19083	2.4691	0.493636	Not assessed	Not assessed
8527	6.02009e-23	0.536932	4.65896e-23	0.415485	0.0475831	10:7658746:A:G	ENSG00000123243_ITIH5.8233.2.3_sun_pQTL	ENSG00000123243_ITIH5.8233.2.3_COVID_A1_h	rs7909223	0.478026	0.513128	-0.527687	1.48374	0.351548	Not assessed	Not assessed
5340	0.03464	0.585255	0.0185884	0.31401	0.0475067	13:67234051:G:A	ENSG00000184226_PCDH9.10558.26.3_sun_pQTL	ENSG00000184226_PCDH9.10558.26.3_COVID_A1_h	rs73196184	0.767254	1.26041	-1.70311	3.23762	0.542702	Not assessed	Not assessed
6960	0.121456	0.447288	0.0819649	0.301805	0.0474865	17:9426347:C:T	ENSG00000170310_STX8.10903.50.3_sun_pQTL	ENSG00000170310_STX8.10903.50.3_COVID_D1_h	rs71358247	1.20074	0.453761	0.31138	2.09009	0.00814054	Not assessed	Not assessed
6213	3.85733e-07	0.588865	2.38273e-07	0.363703	0.0474312	7:81728759:G:A	ENSG00000019991_HGF.2681.23.2_sun_pQTL	ENSG00000019991_HGF.2681.23.2_COVID_A1_h	rs5745695	0.84346	0.95793	-1.03405	2.72097	0.378587	Not assessed	Not assessed
3556	0.00713471	0.709926	0.00234407	0.233195	0.0474001	5:138908579:C:T	ENSG00000146006_LRRTM2.6904.14.3_sun_pQTL	ENSG00000146006_LRRTM2.6904.14.3_COVID_A1_h	rs62381203	1.08193	1.60791	-2.06951	4.23337	0.501024	Not assessed	Not assessed
7443	0.378897	0.229414	0.21448	0.129815	0.0473938	18:69384944:A:G	ENSG00000150637_CD226.5721.1.3_sun_pQTL	ENSG00000150637_CD226.5721.1.3_COVID_D1_h	rs8098513	-1.14143	0.327965	-1.78423	-0.498633	0.000500757	Not assessed	Not assessed
5878	1.03645e-12	0.600464	6.07918e-13	0.352148	0.0473878	1:22735058:G:A	ENSG00000133216_EPHB2.8348.4.3_sun_pQTL	ENSG00000133216_EPHB2.8348.4.3_COVID_A1_h	rs6687487	-0.0341166	0.586663	-1.18396	1.11572	0.953626	Not assessed	Not assessed
4599	6.17271e-64	0.741329	1.75992e-64	0.211316	0.0473553	20:33100454:C:T	ENSG00000125999_BPIFB1.11246.3.3_sun_pQTL	ENSG00000125999_BPIFB1.11246.3.3_COVID_A2_h	rs11696307	0.127136	0.0651613	-0.000577556	0.25485	0.0510451	Not assessed	Not assessed
7446	7.17767e-14	0.387055	1.04905e-13	0.565651	0.0472933	10:42862378:T:G	ENSG00000165731_RET.3220.40.2_sun_pQTL	ENSG00000165731_RET.3220.40.2_COVID_A2_h	rs2796558	0.539687	0.167903	0.210604	0.868771	0.00130769	Not assessed	Not assessed
7218	8.21429e-57	0.565946	5.61443e-57	0.386774	0.04728	19:50981649:A:G	ENSG00000169035_KLK7.3378.49.2_sun_pQTL	ENSG00000169035_KLK7.3378.49.2_COVID_A1_h	rs1991821	-0.146193	0.403828	-0.937682	0.645295	0.717338	Not assessed	Not assessed
4061	0.00469615	0.683688	0.00180372	0.262547	0.0472647	3:50163356:T:C	ENSG00000114378_HYAL1.8309.12.3_sun_pQTL	ENSG00000114378_HYAL1.8309.12.3_COVID_B1_h	rs13069856	0.555605	0.399299	-0.227008	1.33822	0.164089	Not assessed	Not assessed
3669	0.102973	0.600072	0.0365823	0.213135	0.0472376	1:155114607:C:T	ENSG00000169231_THBS3.8982.65.3_sun_pQTL	ENSG00000169231_THBS3.8982.65.3_COVID_A1_h	rs7367758	0.364731	1.20926	-2.00538	2.73485	0.762947	Not assessed	Not assessed
7970	0	0.54634	0	0.406433	0.0472262	19:51500820:C:T	ENSG00000254521_SIGLEC12.10037.98.3_sun_pQTL	ENSG00000254521_SIGLEC12.10037.98.3_COVID_A1_h	rs3826667	0.199468	0.181996	-0.157239	0.556174	0.27308	Not assessed	Not assessed
2369	0.210238	0.585013	0.0416597	0.115876	0.0472135	20:31390409:G:C	ENSG00000180483_DEFB119.8370.102.3_sun_pQTL	ENSG00000180483_DEFB119.8370.102.3_COVID_A1_h	rs73108009	-0.167897	1.56438	-3.23402	2.89823	0.914531	Not assessed	Not assessed
5842	1.3707e-12	0.736336	4.03043e-13	0.216466	0.0471979	17:56778779:A:G	ENSG00000183691_NOG.5846.24.3_sun_pQTL	ENSG00000183691_NOG.5846.24.3_COVID_B2_h	rs79084672	-0.0464969	0.123737	-0.289016	0.196023	0.707086	Not assessed	Not assessed
5100	0.00147259	0.597668	0.000869357	0.352792	0.0471978	6:137218673:G:A	ENSG00000164485_IL22RA2.5087.5.3_sun_pQTL	ENSG00000164485_IL22RA2.5087.5.3_COVID_A1_h	rs10457655	-0.693887	1.1302	-2.90904	1.52126	0.539247	Not assessed	Not assessed
7556	0.286141	0.311891	0.169775	0.185006	0.0471872	19:54962567:G:A	ENSG00000189430_NCR1.8360.169.3_sun_pQTL	ENSG00000189430_NCR1.8360.169.3_COVID_B2_h	rs111380962	-1.58192	0.384209	-2.33495	-0.828882	3.83276e-05	Not assessed	Not assessed
6927	0.0805527	0.590645	0.0338048	0.247823	0.0471744	11:130104033:A:G	ENSG00000084234_APLP2.7915.31.3_sun_pQTL	ENSG00000084234_APLP2.7915.31.3_COVID_D1_h	rs6590438	0.506161	0.268359	-0.0198124	1.03213	0.0592767	Not assessed	Not assessed
7307	5.30687e-74	0.545725	3.95928e-74	0.4071	0.0471744	11:20933724:G:A	ENSG00000165973_NELL1.6544.33.3_sun_pQTL	ENSG00000165973_NELL1.6544.33.3_COVID_A1_h	rs61652119	0.115588	0.269337	-0.412302	0.643479	0.667807	Not assessed	Not assessed
3965	2.05107e-111	0.786668	4.33404e-112	0.166181	0.0471511	20:34077942:A:G	ENSG00000101440_ASIP.5676.54.3_sun_pQTL	ENSG00000101440_ASIP.5676.54.3_COVID_A2_h	rs6059655	0.0913825	0.0929904	-0.0908753	0.27364	0.325751	Not assessed	Not assessed
5819	1.95862e-17	0.702455	6.98305e-18	0.250399	0.0471458	5:95682148:T:G	ENSG00000175449_RFESD.13603.7.3_sun_pQTL	ENSG00000175449_RFESD.13603.7.3_COVID_B2_h	rs77881626	0.109041	0.0859461	-0.0594107	0.277492	0.204545	Not assessed	Not assessed
5272	0	0.610901	0	0.341966	0.0471326	1:203215638:T:C	ENSG00000133063_CHIT1.3600.2.3_sun_pQTL	ENSG00000133063_CHIT1.3600.2.3_COVID_A1_h	rs872583	-0.116017	0.168339	-0.445956	0.213921	0.490706	Not assessed	Not assessed
6599	0.0283981	0.546027	0.018712	0.35974	0.047123	19:17544155:G:A	ENSG00000130309_COLGALT1.5638.23.3_sun_pQTL	ENSG00000130309_COLGALT1.5638.23.3_COVID_A1_h	rs11665697	-1.57459	1.19406	-3.9149	0.765713	0.187272	Not assessed	Not assessed
6184	0.0243703	0.701709	0.00761431	0.219197	0.0471098	4:74382788:G:T	ENSG00000124882_EREG.4956.2.1_sun_pQTL	ENSG00000124882_EREG.4956.2.1_COVID_D1_h	rs78803121	-0.302361	0.228281	-0.749784	0.145062	0.185334	Not assessed	Not assessed
8437	4.00613e-62	0.51466	3.41165e-62	0.438241	0.0470988	21:41349942:C:T	ENSG00000183844_FAM3B.9177.6.3_sun_pQTL	ENSG00000183844_FAM3B.9177.6.3_COVID_A1_h	rs73226194	-0.126342	0.374737	-0.860813	0.608129	0.736005	Not assessed	Not assessed
6070	5.17969e-13	0.594451	3.12385e-13	0.358464	0.0470849	5:180630293:T:C	ENSG00000037280_FLT4.2358.19.2_sun_pQTL	ENSG00000037280_FLT4.2358.19.2_COVID_A1_h	rs34221241	-0.0977025	0.700854	-1.47135	1.27595	0.88913	Not assessed	Not assessed
7391	1.48875e-44	0.557676	1.05546e-44	0.395322	0.0470028	19:54315769:A:C	ENSG00000187116_LILRA5.7787.25.3_sun_pQTL	ENSG00000187116_LILRA5.7787.25.3_COVID_A1_h	rs1645784	-0.320864	0.432169	-1.1679	0.526172	0.457815	Not assessed	Not assessed
7556	4.92829e-12	0.591339	3.015e-12	0.361719	0.0469424	5:39327786:G:T	ENSG00000113600_C9.3060.43.2_sun_pQTL	ENSG00000113600_C9.3060.43.2_COVID_A2_h	rs62358361	-0.1049	0.159512	-0.417537	0.207737	0.510774	Not assessed	Not assessed
5272	3.11298e-07	0.63685	1.54597e-07	0.316225	0.0469238	1:156645322:A:G	ENSG00000132692_BCAN.3461.58.1_sun_pQTL	ENSG00000132692_BCAN.3461.58.1_COVID_A1_h	rs2365715	-0.581028	0.792391	-2.13409	0.972031	0.463401	Not assessed	Not assessed
6283	2.99695e-14	0.607465	1.70537e-14	0.345623	0.0469128	1:167546035:T:C	ENSG00000143162_CREG1.9357.4.3_sun_pQTL	ENSG00000143162_CREG1.9357.4.3_COVID_A1_h	rs7513428	0.369399	0.661266	-0.92666	1.66546	0.576419	Not assessed	Not assessed
6132	3.2683e-133	0.614583	1.80045e-133	0.338516	0.0469005	14:35046400:TGG:T	ENSG00000151327_FAM177A1.8039.41.3_sun_pQTL	ENSG00000151327_FAM177A1.8039.41.3_COVID_A1_h	rs4007475	0.0229856	0.297814	-0.56072	0.606691	0.93848	Not assessed	Not assessed
5104	3.55684e-05	0.599142	2.10146e-05	0.35394	0.046862	6:137218673:G:A	ENSG00000164485_IL22RA2.9456.34.3_sun_pQTL	ENSG00000164485_IL22RA2.9456.34.3_COVID_A1_h	rs10457655	-0.617147	1.0052	-2.58731	1.35302	0.539247	Not assessed	Not assessed
6108	1.76772e-34	0.612414	9.83687e-35	0.340744	0.046842	12:12334513:G:A	ENSG00000111261_MANSC1.9557.5.3_sun_pQTL	ENSG00000111261_MANSC1.9557.5.3_COVID_A1_h	rs2160588	-0.00688495	0.465267	-0.918791	0.905021	0.988193	Not assessed	Not assessed
5878	7.13293e-17	0.600891	4.18296e-17	0.352333	0.046776	1:22735058:G:A	ENSG00000133216_EPHB2.5077.28.3_sun_pQTL	ENSG00000133216_EPHB2.5077.28.3_COVID_A1_h	rs6687487	-0.0304124	0.522966	-1.05541	0.994581	0.953626	Not assessed	Not assessed
7091	0.358338	0.344221	0.127884	0.122799	0.0467581	19:35739969:A:G	ENSG00000188508_KRTDAP.5739.75.3_sun_pQTL	ENSG00000188508_KRTDAP.5739.75.3_COVID_C2_h	rs144495330	0.646111	0.168681	0.315503	0.976719	0.000127946	Not assessed	Not assessed
7850	0.00153993	0.610178	0.000859905	0.34068	0.0467422	16:57379748:C:T	ENSG00000006210_CX3CL1.2827.23.2_sun_pQTL	ENSG00000006210_CX3CL1.2827.23.2_COVID_A2_h	rs62037084	0.0114704	0.197793	-0.376196	0.399137	0.953755	Not assessed	Not assessed
4708	1.92889e-12	0.627531	1.00139e-12	0.325738	0.046731	17:58243910:G:A	ENSG00000167419_LPO.4801.13.3_sun_pQTL	ENSG00000167419_LPO.4801.13.3_COVID_A1_h	rs7219860	0.083884	0.72335	-1.33386	1.50162	0.907679	Not assessed	Not assessed
6259	0	0.594602	0	0.358676	0.0467212	11:18269356:T:C	ENSG00000173432_SAA1.4336.2.1_sun_pQTL	ENSG00000173432_SAA1.4336.2.1_COVID_A1_h	rs35179000	-0.0593785	0.193602	-0.438831	0.320073	0.759068	Not assessed	Not assessed
6604	0.430105	0.158443	0.266613	0.0981687	0.0466699	11:1219991:G:T	ENSG00000177030_DEAF1.6369.82.3_sun_pQTL	ENSG00000177030_DEAF1.6369.82.3_COVID_B2_h	rs35705950	1.52136	0.376764	0.78292	2.25981	5.39137e-05	Not assessed	Not assessed
8588	8.22851e-15	0.548848	6.06536e-15	0.404518	0.0466338	4:3494956:G:A	ENSG00000163956_LRPAP1.3640.14.3_sun_pQTL	ENSG00000163956_LRPAP1.3640.14.3_COVID_B1_h	rs78770234	-0.174344	0.167835	-0.503294	0.154606	0.298905	Not assessed	Not assessed
6847	2.31309e-22	0.708429	7.99965e-23	0.244958	0.0466135	4:87388983:A:G	ENSG00000170502_NUDT9.9482.110.3_sun_pQTL	ENSG00000170502_NUDT9.9482.110.3_COVID_B2_h	rs28696943	-0.162162	0.0943433	-0.347071	0.0227477	0.085642	Not assessed	Not assessed
7078	7.01654e-05	0.60296	4.0773e-05	0.350332	0.0465967	16:619708:T:G	ENSG00000127578_WFIKKN1.3191.50.2_sun_pQTL	ENSG00000127578_WFIKKN1.3191.50.2_COVID_B1_h	rs55798945	0.434517	0.271933	-0.0984614	0.967495	0.110069	Not assessed	Not assessed
6716	5.54499e-07	0.567362	3.77358e-07	0.386065	0.0465716	14:79063414:G:A	ENSG00000021645_NRXN3.5111.15.3_sun_pQTL	ENSG00000021645_NRXN3.5111.15.3_COVID_A1_h	rs7149771	-0.986418	0.909195	-2.76841	0.795571	0.27795	Not assessed	Not assessed
5443	1.72638e-22	0.68136	6.89495e-23	0.27208	0.0465596	17:58281068:C:T	ENSG00000005381_MPO.2580.83.2_sun_pQTL	ENSG00000005381_MPO.2580.83.2_COVID_B1_h	rs34097845	0.182828	0.191022	-0.191568	0.557223	0.338514	Not assessed	Not assessed
8645	0.223471	0.373667	0.133365	0.222954	0.0465419	9:135513146:G:C	ENSG00000160349_LCN1.11708.2.3_sun_pQTL	ENSG00000160349_LCN1.11708.2.3_COVID_A2_h	rs73557343	-0.813572	0.357293	-1.51385	-0.113292	0.0227833	Not assessed	Not assessed
4760	4.8835e-19	0.67461	2.01897e-19	0.278855	0.0465353	1:153970121:T:G	ENSG00000143578_CREB3L4.11308.8.3_sun_pQTL	ENSG00000143578_CREB3L4.11308.8.3_COVID_A1_h	rs4845586	0.388486	0.580829	-0.749919	1.52689	0.503593	Not assessed	Not assessed
5087	0.00039723	0.690545	0.000150983	0.262422	0.0464852	12:56163033:T:C	ENSG00000065361_ERBB3.2617.56.35_sun_pQTL	ENSG00000065361_ERBB3.2617.56.35_COVID_C2_h	rs76400083	-0.0805606	0.106937	-0.290154	0.129032	0.451242	Not assessed	Not assessed
7165	5.06973e-91	0.564325	3.49687e-91	0.3892	0.0464748	9:133433011:T:G	ENSG00000160323_ADAMTS13.3175.51.5_sun_pQTL	ENSG00000160323_ADAMTS13.3175.51.5_COVID_A1_h	rs71503194	0.0331781	0.331196	-0.615955	0.682311	0.920204	Not assessed	Not assessed
6818	4.22549e-155	0.589827	2.60617e-155	0.363744	0.0464285	9:115073620:C:T	ENSG00000041982_TNC.4155.3.2_sun_pQTL	ENSG00000041982_TNC.4155.3.2_COVID_A1_h	rs1138545	-0.104737	0.277831	-0.649277	0.439802	0.706187	Not assessed	Not assessed
7641	4.31685e-33	0.666562	1.85906e-33	0.28701	0.0464272	21:36074301:C:A	ENSG00000159228_CBR1.12381.26.3_sun_pQTL	ENSG00000159228_CBR1.12381.26.3_COVID_D1_h	rs16993864	-0.107728	0.0902971	-0.284707	0.0692513	0.232855	Not assessed	Not assessed
7428	0.0144014	0.511595	0.0117086	0.415889	0.0464061	22:43377871:A:T	ENSG00000159307_SCUBE1.8989.40.3_sun_pQTL	ENSG00000159307_SCUBE1.8989.40.3_COVID_A1_h	rs9612058	-1.204	1.15872	-3.47505	1.06705	0.29877	Not assessed	Not assessed
7052	0.238544	0.177474	0.308282	0.229313	0.0463871	8:78661917:G:A	ENSG00000104432_IL7.14049.17.3_sun_pQTL	ENSG00000104432_IL7.14049.17.3_COVID_C1_h	rs11783869	-1.86204	0.470871	-2.78493	-0.939147	7.67105e-05	Not assessed	Not assessed
5871	0.312174	0.324937	0.155104	0.161399	0.0463851	1:191645884:T:G	ENSG00000150681_RGS18.13982.33.3_sun_pQTL	ENSG00000150681_RGS18.13982.33.3_COVID_A2_h	rs2814589	0.585283	0.340807	-0.0826873	1.25325	0.0859167	Not assessed	Not assessed
5468	0.00233946	0.480146	0.00228477	0.468874	0.0463549	22:29080781:A:G	ENSG00000183762_KREMEN1.6512.68.3_sun_pQTL	ENSG00000183762_KREMEN1.6512.68.3_COVID_B2_h	rs77320622	0.2122	0.0994664	0.0172492	0.40715	0.0328934	Not assessed	Not assessed
8495	0.272286	0.293193	0.186948	0.201256	0.0463173	11:134310879:A:G	ENSG00000166086_JAM3.2998.53.2_sun_pQTL	ENSG00000166086_JAM3.2998.53.2_COVID_B1_h	rs548378	-1.51976	0.471631	-2.44414	-0.595378	0.00127146	Not assessed	Not assessed
7993	0.363481	0.216967	0.233752	0.139484	0.0463155	19:6296518:C:T	ENSG00000105426_PTPRS.6049.64.3_sun_pQTL	ENSG00000105426_PTPRS.6049.64.3_COVID_B1_h	rs113523944	1.49841	0.470357	0.576528	2.4203	0.0014441	Not assessed	Not assessed
3545	1.06871e-22	0.777607	2.42063e-23	0.176083	0.04631	7:73698011:C:T	ENSG00000176410_DNAJC30.7866.11.3_sun_pQTL	ENSG00000176410_DNAJC30.7866.11.3_COVID_C2_h	rs11544049	0.0833598	0.04815	-0.0110124	0.177732	0.0834067	Not assessed	Not assessed
4514	3.99782e-09	0.664866	1.73708e-09	0.288843	0.0462909	5:87399457:A:G	ENSG00000134480_CCNH.9848.22.3_sun_pQTL	ENSG00000134480_CCNH.9848.22.3_COVID_A1_h	rs2230641	-0.388047	0.736505	-1.83157	1.05548	0.598279	Not assessed	Not assessed
5413	0	0.63925	0	0.31446	0.0462899	2:102305323:T:G	ENSG00000115602_IL1RL1.4234.8.2_sun_pQTL	ENSG00000115602_IL1RL1.4234.8.2_COVID_A1_h	rs10179654	0.137121	0.169044	-0.194199	0.468441	0.417275	Not assessed	Not assessed
5819	6.93222e-05	0.612408	3.86272e-05	0.341195	0.0462885	12:6707118:G:T	ENSG00000139200_PIANP.9599.6.3_sun_pQTL	ENSG00000139200_PIANP.9599.6.3_COVID_A1_h	rs7485433	0.190287	1.20353	-2.16858	2.54916	0.874372	Not assessed	Not assessed
5973	0.0891951	0.514545	0.0517182	0.298303	0.0462383	14:99961255:A:G	ENSG00000196405_EVL.11656.110.3_sun_pQTL	ENSG00000196405_EVL.11656.110.3_COVID_A1_h	rs11160566	0.208681	1.18997	-2.12362	2.54098	0.860792	Not assessed	Not assessed
7579	0.00313365	0.536453	0.0024056	0.411771	0.046236	6:7887104:G:A	ENSG00000239264_TXNDC5.11212.7.3_sun_pQTL	ENSG00000239264_TXNDC5.11212.7.3_COVID_A1_h	rs75933408	-1.09539	1.18266	-3.41336	1.22259	0.35434	Not assessed	Not assessed
8238	3.90308e-08	0.636993	1.94126e-08	0.316772	0.0462352	7:45914866:G:A	ENSG00000146674_IGFBP3.2571.12.3_sun_pQTL	ENSG00000146674_IGFBP3.2571.12.3_COVID_B1_h	rs145188037	-0.0152619	0.203756	-0.414617	0.384093	0.940292	Not assessed	Not assessed
6267	0.465012	0.287852	0.124119	0.0767857	0.0462321	6:89259189:C:T	ENSG00000198833_UBE2J1.6900.30.3_sun_pQTL	ENSG00000198833_UBE2J1.6900.30.3_COVID_C2_h	rs117382410	-0.852773	0.197833	-1.24052	-0.465027	1.6284e-05	Not assessed	Not assessed
6285	0.00621627	0.596082	0.003628	0.347845	0.0462278	11:122880113:C:T	ENSG00000109943_CRTAM.7968.15.3_sun_pQTL	ENSG00000109943_CRTAM.7968.15.3_COVID_A1_h	rs61910301	0.149098	1.23571	-2.27285	2.57105	0.903962	Not assessed	Not assessed
4618	0.0060996	0.732102	0.00178167	0.213799	0.0462177	1:1360302:A:G	ENSG00000162576_MXRA8.10521.10.3_sun_pQTL	ENSG00000162576_MXRA8.10521.10.3_COVID_A2_h	rs35705386	0.469933	0.285997	-0.0906099	1.03048	0.100353	Not assessed	Not assessed
5199	0.18747	0.452765	0.091825	0.221724	0.0462161	19:42961019:T:C	ENSG00000221878_PSG7.5651.50.3_sun_pQTL	ENSG00000221878_PSG7.5651.50.3_COVID_A1_h	rs10419095	-2.35481	1.62997	-5.54949	0.839862	0.148542	Not assessed	Not assessed
6656	2.5798e-32	0.582333	1.64579e-32	0.371454	0.0462137	2:71067422:A:G	ENSG00000124357_NAGK.3894.15.2_sun_pQTL	ENSG00000124357_NAGK.3894.15.2_COVID_A1_h	rs2287331	0.431859	0.498394	-0.544976	1.40869	0.386216	Not assessed	Not assessed
6866	3.67912e-07	0.554205	2.65295e-07	0.399581	0.0462133	11:116778201:G:C	ENSG00000110243_APOA5.11318.20.3_sun_pQTL	ENSG00000110243_APOA5.11318.20.3_COVID_A1_h	rs964184	-0.601981	0.833714	-2.23603	1.03207	0.470266	Not assessed	Not assessed
5876	6.13193e-34	0.601318	3.59493e-34	0.352485	0.0461974	1:22735058:G:A	ENSG00000133216_EPHB2.8225.86.3_sun_pQTL	ENSG00000133216_EPHB2.8225.86.3_COVID_A1_h	rs6687487	-0.0226478	0.389448	-0.785952	0.740656	0.953626	Not assessed	Not assessed
5714	4.31512e-08	0.600579	2.53823e-08	0.353224	0.0461965	19:44918903:C:G	ENSG00000130203_APOE.5312.49.3_sun_pQTL	ENSG00000130203_APOE.5312.49.3_COVID_A1_h	rs12721051	-0.152113	0.817575	-1.75453	1.4503	0.852402	Not assessed	Not assessed
7966	9.62346e-23	0.681936	3.83768e-23	0.271899	0.046165	7:23587668:C:T	ENSG00000169193_CCDC126.6388.21.3_sun_pQTL	ENSG00000169193_CCDC126.6388.21.3_COVID_B2_h	rs227934	0.193936	0.0947072	0.00831334	0.379559	0.0405851	Not assessed	Not assessed
6543	0.000796052	0.666278	0.000342276	0.286432	0.0461522	5:148121026:T:A	ENSG00000133710_SPINK5.8028.22.3_sun_pQTL	ENSG00000133710_SPINK5.8028.22.3_COVID_B1_h	rs10065596	-0.721822	0.304089	-1.31783	-0.125819	0.0176099	Not assessed	Not assessed
5258	0.0755319	0.575983	0.0350559	0.26728	0.0461488	11:48423102:T:G	ENSG00000149177_PTPRJ.8250.2.3_sun_pQTL	ENSG00000149177_PTPRJ.8250.2.3_COVID_A1_h	rs10769356	1.87515	1.49462	-1.05425	4.80454	0.209624	Not assessed	Not assessed
9243	7.25118e-23	0.646249	3.45222e-23	0.307627	0.0461248	10:7658746:A:G	ENSG00000123243_ITIH5.8233.2.3_sun_pQTL	ENSG00000123243_ITIH5.8233.2.3_COVID_B2_h	rs7909223	-0.14703	0.0758908	-0.295773	0.00171334	0.052698	Not assessed	Not assessed
6579	8.39139e-48	0.584755	5.29766e-48	0.369122	0.0461227	20:2800037:G:A	ENSG00000088882_CPXM1.6255.74.3_sun_pQTL	ENSG00000088882_CPXM1.6255.74.3_COVID_A1_h	rs34211052	-0.11362	0.384516	-0.867257	0.640016	0.76762	Not assessed	Not assessed
6806	1.12847e-13	0.581052	7.24189e-14	0.372839	0.0461092	5:98456016:C:T	ENSG00000174136_RGMB.3331.8.1_sun_pQTL	ENSG00000174136_RGMB.3331.8.1_COVID_A1_h	rs6870628	-0.539748	0.669407	-1.85176	0.772265	0.420066	Not assessed	Not assessed
4717	0.1279	0.188663	0.257519	0.379815	0.0461039	7:100265861:A:G	ENSG00000085514_PILRA.8683.119.3_sun_pQTL	ENSG00000085514_PILRA.8683.119.3_COVID_A2_h	rs113842733	0.596333	0.259586	0.0875546	1.10511	0.0216045	Not assessed	Not assessed
6615	4.93054e-06	0.588716	3.05878e-06	0.365179	0.046097	12:69039624:G:C	ENSG00000135678_CPM.7768.10.3_sun_pQTL	ENSG00000135678_CPM.7768.10.3_COVID_A1_h	rs1908671	0.742604	0.869069	-0.960741	2.44595	0.392838	Not assessed	Not assessed
4986	0.0147564	0.687641	0.00528502	0.246233	0.046084	2:162182309:C:T	ENSG00000078098_FAP.5029.3.1_sun_pQTL	ENSG00000078098_FAP.5029.3.1_COVID_D1_h	rs78034415	0.173027	0.144996	-0.11116	0.457215	0.232742	Not assessed	Not assessed
5924	4.39843e-74	0.508434	3.85424e-74	0.445483	0.0460825	14:74020818:G:A	ENSG00000187097_ENTPD5.4437.56.3_sun_pQTL	ENSG00000187097_ENTPD5.4437.56.3_COVID_D1_h	rs57731447	0.0979448	0.0611016	-0.0218121	0.217702	0.108938	Not assessed	Not assessed
8175	6.04908e-74	0.610608	3.40187e-74	0.343346	0.0460465	11:20933724:G:A	ENSG00000165973_NELL1.6544.33.3_sun_pQTL	ENSG00000165973_NELL1.6544.33.3_COVID_B1_h	rs61652119	-0.111029	0.0922238	-0.291784	0.0697264	0.228625	Not assessed	Not assessed
6435	1.82084e-17	0.789226	3.80165e-18	0.164733	0.046041	1:63653675:T:C	ENSG00000079739_PGM1.9173.21.3_sun_pQTL	ENSG00000079739_PGM1.9173.21.3_COVID_C2_h	rs2269233	0.106472	0.0507108	0.00708034	0.205863	0.0357653	Not assessed	Not assessed
4395	0.164179	0.552242	0.0544491	0.183102	0.0460281	16:67939604:A:G	ENSG00000167261_DPEP2.8327.26.3_sun_pQTL	ENSG00000167261_DPEP2.8327.26.3_COVID_D1_h	rs17240406	-0.292479	0.240479	-0.76381	0.178851	0.223895	Not assessed	Not assessed
6757	0.224729	0.271427	0.207384	0.250432	0.0460274	15:78738797:G:C	ENSG00000103811_CTSH.3737.6.3_sun_pQTL	ENSG00000103811_CTSH.3737.6.3_COVID_A1_h	rs112723723	6.97366	2.52567	2.02344	11.9239	0.00576049	Not assessed	Not assessed
6887	4.27865e-75	0.581188	2.74476e-75	0.372787	0.0460247	11:126019631:C:T	ENSG00000064309_CDON.4541.49.2_sun_pQTL	ENSG00000064309_CDON.4541.49.2_COVID_A1_h	rs3740909	-0.0742338	0.305621	-0.67324	0.524772	0.808087	Not assessed	Not assessed
6923	5.13839e-98	0.645916	2.45111e-98	0.308068	0.0460162	4:24800212:C:G	ENSG00000109610_SOD3.8463.2.3_sun_pQTL	ENSG00000109610_SOD3.8463.2.3_COVID_A2_h	rs1799895	-0.00615789	0.0879004	-0.178439	0.166124	0.94415	Not assessed	Not assessed
7293	0.0397995	0.673765	0.0134123	0.227011	0.0460124	1:236067017:G:A	ENSG00000116962_NID1.3213.65.2_sun_pQTL	ENSG00000116962_NID1.3213.65.2_COVID_C1_h	rs76183323	-0.0617924	0.126543	-0.309812	0.186227	0.625329	Not assessed	Not assessed
6262	0.104082	0.559905	0.0454743	0.244581	0.0459576	20:45627543:G:GT	ENSG00000101443_WFDC2.11388.75.3_sun_pQTL	ENSG00000101443_WFDC2.11388.75.3_COVID_B1_h	rs3092052	1.45048	0.476901	0.515771	2.38519	0.00235427	Not assessed	Not assessed
7060	0.0117168	0.568456	0.00755184	0.366343	0.0459321	4:75934472:C:T	ENSG00000138755_CXCL9.9188.119.3_sun_pQTL	ENSG00000138755_CXCL9.9188.119.3_COVID_A1_h	rs28422144	2.31062	1.76851	-1.15559	5.77683	0.191371	Not assessed	Not assessed
4546	6.79889e-07	0.671456	2.86219e-07	0.282623	0.0459203	15:73034620:G:C	ENSG00000067141_NEO1.8900.28.3_sun_pQTL	ENSG00000067141_NEO1.8900.28.3_COVID_A1_h	rs12903656	0.385599	0.858756	-1.29753	2.06873	0.653416	Not assessed	Not assessed
8052	1.35376e-32	0.629044	6.9962e-33	0.325041	0.045915	2:36705350:A:T	ENSG00000205221_VIT.6234.74.3_sun_pQTL	ENSG00000205221_VIT.6234.74.3_COVID_D1_h	rs10490666	0.151642	0.0830712	-0.0111743	0.314459	0.0679333	Not assessed	Not assessed
5594	1.18872e-126	0.622859	6.32236e-127	0.331229	0.0459122	17:50830473:T:C	ENSG00000173714_WFIKKN2.3235.50.2_sun_pQTL	ENSG00000173714_WFIKKN2.3235.50.2_COVID_A1_h	rs11079936	0.199148	0.260154	-0.310744	0.70904	0.443974	Not assessed	Not assessed
9291	0.325496	0.189457	0.277625	0.161547	0.0458753	16:89196249:G:A	ENSG00000129910_CDH15.5410.53.3_sun_pQTL	ENSG00000129910_CDH15.5410.53.3_COVID_C2_h	rs117169628	0.985967	0.220448	0.553897	1.41804	7.72894e-06	Not assessed	Not assessed
8032	0.0862241	0.447533	0.0679148	0.352455	0.0458727	3:126129590:T:A	ENSG00000144909_OSBPL11.12878.60.3_sun_pQTL	ENSG00000144909_OSBPL11.12878.60.3_COVID_A1_h	rs1868129	-1.70364	1.33264	-4.31556	0.908283	0.20111	Not assessed	Not assessed
6838	0.00783696	0.669837	0.00319833	0.273321	0.0458066	13:77000848:A:G	ENSG00000102805_CLN5.8874.53.3_sun_pQTL	ENSG00000102805_CLN5.8874.53.3_COVID_D1_h	rs1800209	0.308054	0.191424	-0.0671308	0.683238	0.107557	Not assessed	Not assessed
5799	1.59058e-50	0.614156	8.80807e-51	0.340053	0.0457911	20:14708500:T:C	ENSG00000125848_FLRT3.13123.3.3_sun_pQTL	ENSG00000125848_FLRT3.13123.3.3_COVID_A1_h	rs11908097	-0.441112	0.393272	-1.21191	0.329687	0.262013	Not assessed	Not assessed
6671	0.0861012	0.530173	0.0472211	0.290721	0.0457836	14:99961255:A:G	ENSG00000196405_EVL.11656.110.3_sun_pQTL	ENSG00000196405_EVL.11656.110.3_COVID_B1_h	rs11160566	-0.159635	0.351672	-0.848899	0.529629	0.649877	Not assessed	Not assessed
6930	5.37594e-09	0.577702	3.50419e-09	0.376516	0.0457815	6:70855775:T:C	ENSG00000112305_SMAP1.11649.3.3_sun_pQTL	ENSG00000112305_SMAP1.11649.3.3_COVID_A1_h	rs2504756	-0.704245	0.788037	-2.24877	0.84028	0.371499	Not assessed	Not assessed
6263	0.3656	0.210599	0.239912	0.138152	0.0457377	19:35422083:C:T	ENSG00000105697_HAMP.3504.58.2_sun_pQTL	ENSG00000105697_HAMP.3504.58.2_COVID_A1_h	rs76666167	5.5791	1.68135	2.28372	8.87448	0.000905902	Not assessed	Not assessed
5201	0.0560749	0.596688	0.025904	0.275596	0.0457365	15:64034683:G:A	ENSG00000035664_DAPK2.4355.13.1_sun_pQTL	ENSG00000035664_DAPK2.4355.13.1_COVID_A1_h	rs11636342	0.757662	1.24682	-1.68606	3.20138	0.543403	Not assessed	Not assessed
5124	2.83628e-11	0.635818	1.42082e-11	0.318464	0.0457181	7:100638579:G:A	ENSG00000106333_PCOLCE.11237.49.3_sun_pQTL	ENSG00000106333_PCOLCE.11237.49.3_COVID_A1_h	rs9801017	0.567345	0.712873	-0.82986	1.96455	0.426115	Not assessed	Not assessed
8319	0.336559	0.30537	0.163793	0.148568	0.04571	11:8021893:G:T	ENSG00000166405_RIC3.11228.37.3_sun_pQTL	ENSG00000166405_RIC3.11228.37.3_COVID_A2_h	rs11041713	-1.02336	0.388814	-1.78542	-0.261297	0.0084884	Not assessed	Not assessed
4587	0.00460599	0.727147	0.00140107	0.221141	0.0457048	6:170279471:T:G	ENSG00000198719_DLL1.8264.43.3_sun_pQTL	ENSG00000198719_DLL1.8264.43.3_COVID_B1_h	rs2344744	0.433252	0.280086	-0.115707	0.982211	0.121899	Not assessed	Not assessed
8084	0.137812	0.0720931	0.48877	0.255643	0.045682	4:100295923:T:A	ENSG00000164031_DNAJB14.8053.16.3_sun_pQTL	ENSG00000164031_DNAJB14.8053.16.3_COVID_C1_h	rs4130109	1.80414	0.366391	1.08603	2.52225	8.4756e-07	Not assessed	Not assessed
5176	3.38262e-232	0.633432	1.71392e-232	0.320905	0.0456633	15:69267001:G:T	ENSG00000138604_GLCE.7808.5.3_sun_pQTL	ENSG00000138604_GLCE.7808.5.3_COVID_A1_h	rs11854180	-0.105333	0.215387	-0.527485	0.316818	0.624813	Not assessed	Not assessed
5310	1.94825e-243	0.6244	1.02961e-243	0.329938	0.0456619	12:14835521:G:A	ENSG00000111339_ART4.6576.1.3_sun_pQTL	ENSG00000111339_ART4.6576.1.3_COVID_A1_h	rs1001096	-0.150027	0.218432	-0.578147	0.278093	0.492187	Not assessed	Not assessed
7147	0.000110926	0.550173	8.14591e-05	0.403978	0.0456564	20:1026987:C:T	ENSG00000101282_RSPO4.8464.31.3_sun_pQTL	ENSG00000101282_RSPO4.8464.31.3_COVID_A1_h	rs6039500	0.538586	0.996954	-1.41541	2.49258	0.589037	Not assessed	Not assessed
5414	2.9031e-119	0.639649	1.42849e-119	0.314698	0.0456528	2:102390760:T:C	ENSG00000115604_IL18R1.14079.14.3_sun_pQTL	ENSG00000115604_IL18R1.14079.14.3_COVID_A1_h	rs2001461	-0.000416783	0.316931	-0.62159	0.620756	0.998951	Not assessed	Not assessed
6635	5.40287e-70	0.669512	2.29905e-70	0.284848	0.0456402	5:136053744:C:T	ENSG00000120708_TGFBI.3283.21.1_sun_pQTL	ENSG00000120708_TGFBI.3283.21.1_COVID_B1_h	rs13159365	0.149556	0.0938601	-0.0344063	0.333519	0.111072	Not assessed	Not assessed
6744	0.0366338	0.53892	0.0241157	0.35472	0.0456107	1:111226195:G:A	ENSG00000064886_CHI3L2.9383.24.3_sun_pQTL	ENSG00000064886_CHI3L2.9383.24.3_COVID_A1_h	rs112495041	-0.502639	1.23327	-2.9198	1.91452	0.683591	Not assessed	Not assessed
4731	0.0481049	0.612743	0.0213713	0.272175	0.0456062	9:34710087:A:C	ENSG00000137077_CCL21.2516.57.3_sun_pQTL	ENSG00000137077_CCL21.2516.57.3_COVID_A1_h	rs11574915	-0.170761	1.15865	-2.44167	2.10014	0.882832	Not assessed	Not assessed
6749	2.07153e-15	0.675974	8.53365e-16	0.278421	0.045605	1:159574140:C:T	ENSG00000132703_APCS.2474.54.5_sun_pQTL	ENSG00000132703_APCS.2474.54.5_COVID_D1_h	rs192768215	0.17736	0.15373	-0.123944	0.478664	0.248617	Not assessed	Not assessed
6468	1.69789e-08	0.591481	1.042e-08	0.362948	0.0455706	4:89836689:T:C	ENSG00000145335_SNCA.8458.16.3_sun_pQTL	ENSG00000145335_SNCA.8458.16.3_COVID_A1_h	rs2245801	-0.58337	0.790274	-2.13228	0.965538	0.460401	Not assessed	Not assessed
7705	6.63883e-43	0.507245	5.85353e-43	0.447198	0.0455579	8:56964017:T:C	ENSG00000104331_IMPAD1.9231.23.3_sun_pQTL	ENSG00000104331_IMPAD1.9231.23.3_COVID_B1_h	rs112433249	-0.118847	0.115094	-0.344427	0.106733	0.301788	Not assessed	Not assessed
9224	1.15665e-12	0.556077	8.28719e-13	0.398373	0.0455503	19:51627384:T:A	ENSG00000254415_SIGLEC14.5125.6.3_sun_pQTL	ENSG00000254415_SIGLEC14.5125.6.3_COVID_B1_h	rs1106476	0.294847	0.19611	-0.0895209	0.679216	0.132715	Not assessed	Not assessed
8350	1.69294e-290	0.531431	1.34781e-290	0.423045	0.0455237	19:51627384:T:A	ENSG00000254415_SIGLEC14.8248.222.3_sun_pQTL	ENSG00000254415_SIGLEC14.8248.222.3_COVID_A1_h	rs1106476	-0.145192	0.207812	-0.552496	0.262111	0.484757	Not assessed	Not assessed
5604	0.0162026	0.590689	0.00928105	0.338309	0.0455184	19:670234:T:C	ENSG00000070404_FSTL3.3438.10.2_sun_pQTL	ENSG00000070404_FSTL3.3438.10.2_COVID_A1_h	rs7250835	0.0981521	1.26321	-2.37769	2.57399	0.938066	Not assessed	Not assessed
4668	0.0311613	0.629074	0.0138904	0.28037	0.0455035	10:72280276:A:C	ENSG00000148719_DNAJB12.8006.12.3_sun_pQTL	ENSG00000148719_DNAJB12.8006.12.3_COVID_A1_h	rs10823911	1.71104	1.51013	-1.24877	4.67084	0.257198	Not assessed	Not assessed
6781	8.09932e-79	0.557864	5.75969e-79	0.396669	0.0454669	6:41287003:G:T	ENSG00000124731_TREM1.9266.1.3_sun_pQTL	ENSG00000124731_TREM1.9266.1.3_COVID_A1_h	rs3789204	-0.283788	0.331474	-0.933465	0.365889	0.39192	Not assessed	Not assessed
7348	1.71058e-34	0.595012	1.03381e-34	0.359559	0.0454285	19:50719037:C:T	ENSG00000105472_CLEC11A.2966.65.2_sun_pQTL	ENSG00000105472_CLEC11A.2966.65.2_COVID_B2_h	rs540781594	-0.190251	0.102994	-0.392115	0.0116129	0.0647166	Not assessed	Not assessed
7549	0.0848507	0.548461	0.043049	0.278216	0.0454232	1:159506646:A:G	ENSG00000162706_CADM3.3630.27.4_sun_pQTL	ENSG00000162706_CADM3.3630.27.4_COVID_A2_h	rs57256834	0.892933	0.317965	0.269733	1.51613	0.00498076	Not assessed	Not assessed
6245	2.13326e-15	0.582567	1.36245e-15	0.372023	0.04541	8:27951477:T:G	ENSG00000168079_SCARA5.10419.1.3_sun_pQTL	ENSG00000168079_SCARA5.10419.1.3_COVID_A1_h	rs10866867	-0.481553	0.643989	-1.74375	0.780642	0.454601	Not assessed	Not assessed
6528	7.24137e-08	0.648175	3.42381e-08	0.30642	0.0454047	12:58879191:T:C	ENSG00000139263_LRIG3.3322.52.2_sun_pQTL	ENSG00000139263_LRIG3.3322.52.2_COVID_B1_h	rs11172791	-0.222448	0.249827	-0.7121	0.267204	0.373247	Not assessed	Not assessed
3882	3.41418e-11	0.680141	1.37825e-11	0.274517	0.0453423	1:206940410:G:C	ENSG00000162896_PIGR.3216.2.2_sun_pQTL	ENSG00000162896_PIGR.3216.2.2_COVID_A1_h	rs2007272	0.319068	0.714537	-1.0814	1.71953	0.655208	Not assessed	Not assessed
6464	6.17666e-11	0.591688	3.78964e-11	0.362981	0.0453309	4:89836689:T:C	ENSG00000145335_SNCA.8458.111.3_sun_pQTL	ENSG00000145335_SNCA.8458.111.3_COVID_A1_h	rs2245801	-0.535899	0.725967	-1.95877	0.88697	0.460401	Not assessed	Not assessed
6922	0.217694	0.435225	0.100628	0.201135	0.0453183	12:117053731:C:T	ENSG00000088992_TESC.12831.21.3_sun_pQTL	ENSG00000088992_TESC.12831.21.3_COVID_D1_h	rs6490106	-0.470457	0.250888	-0.962189	0.0212738	0.0607694	Not assessed	Not assessed
7606	0.0559786	0.0273019	0.585763	0.285643	0.0453138	6:41529297:C:A	ENSG00000161911_TREML1.9329.28.3_sun_pQTL	ENSG00000161911_TREML1.9329.28.3_COVID_B2_h	rs1853837	-3.61962	0.728533	-5.04752	-2.19172	6.752e-07	Not assessed	Not assessed
6047	0.000442721	0.563332	0.000307019	0.390616	0.045302	4:87519065:A:G	ENSG00000152583_SPARCL1.13707.27.3_sun_pQTL	ENSG00000152583_SPARCL1.13707.27.3_COVID_A1_h	rs17012758	1.48826	1.24678	-0.955388	3.93191	0.232603	Not assessed	Not assessed
7598	0.0579117	0.0254252	0.605574	0.265823	0.0452668	6:41534945:A:C	ENSG00000188056_TREML4.11139.4.3_sun_pQTL	ENSG00000188056_TREML4.11139.4.3_COVID_B2_h	rs1886814	-2.13779	0.44113	-3.00239	-1.27319	1.25869e-06	Not assessed	Not assessed
6141	9.33524e-08	0.606234	5.36729e-08	0.348509	0.0452572	14:69371316:C:A	ENSG00000100626_GALNT16.8923.94.3_sun_pQTL	ENSG00000100626_GALNT16.8923.94.3_COVID_A1_h	rs71423357	0.289774	0.806213	-1.29037	1.86992	0.719276	Not assessed	Not assessed
5417	0.38229	0.152961	0.299654	0.119852	0.0452427	11:75744264:A:G	ENSG00000149273_RPS3.5026.66.1_sun_pQTL	ENSG00000149273_RPS3.5026.66.1_COVID_D1_h	rs600626	-1.27791	0.374936	-2.01277	-0.543046	0.000653612	Not assessed	Not assessed
6767	0.271733	0.145295	0.350413	0.187321	0.0452377	8:78716761:C:A	ENSG00000104435_STMN2.10900.272.3_sun_pQTL	ENSG00000104435_STMN2.10900.272.3_COVID_C1_h	rs62518988	1.24413	0.31988	0.61718	1.87108	0.000100502	Not assessed	Not assessed
6842	1.55294e-304	0.588338	9.67451e-305	0.366478	0.0451837	1:157589332:C:T	ENSG00000163518_FCRL4.8973.23.3_sun_pQTL	ENSG00000163518_FCRL4.8973.23.3_COVID_A1_h	rs11582663	-0.0952246	0.182796	-0.453499	0.26305	0.602413	Not assessed	Not assessed
7402	0.374411	0.255105	0.193506	0.1318	0.045178	6:52406396:AAG:A	ENSG00000112115_IL17A.13718.1.3_sun_pQTL	ENSG00000112115_IL17A.13718.1.3_COVID_D1_h	rs141632223	1.30676	0.445785	0.433038	2.18048	0.0033747	Not assessed	Not assessed
5588	0.036909	0.53471	0.0247471	0.358472	0.0451612	8:81486344:A:G	ENSG00000170323_FABP4.9851.9.3_sun_pQTL	ENSG00000170323_FABP4.9851.9.3_COVID_A1_h	rs57697972	-0.797984	1.29219	-3.33062	1.73466	0.536875	Not assessed	Not assessed
5683	0	0.605727	0	0.34912	0.0451534	1:65619842:T:A	ENSG00000116678_LEPR.5400.52.3_sun_pQTL	ENSG00000116678_LEPR.5400.52.3_COVID_A1_h	rs3790438	0.0762896	0.142488	-0.202982	0.355561	0.592367	Not assessed	Not assessed
7182	1.48574e-170	0.56487	1.02588e-170	0.389989	0.0451419	6:3003736:A:G	ENSG00000124588_NQO2.9754.33.3_sun_pQTL	ENSG00000124588_NQO2.9754.33.3_COVID_A1_h	rs4149358	0.205521	0.269501	-0.322692	0.733733	0.445704	Not assessed	Not assessed
6846	1.28199e-13	0.56226	8.95334e-14	0.392635	0.045105	7:23251368:G:A	ENSG00000136235_GPNMB.5080.131.3_sun_pQTL	ENSG00000136235_GPNMB.5080.131.3_COVID_A1_h	rs10262243	0.705315	0.695712	-0.658256	2.06889	0.310677	Not assessed	Not assessed
5112	8.97292e-08	0.648751	4.23514e-08	0.306159	0.0450898	1:88946689:G:A	ENSG00000137944_CCBL2.12682.5.3_sun_pQTL	ENSG00000137944_CCBL2.12682.5.3_COVID_A1_h	rs12144640	-0.654805	0.797263	-2.21741	0.907801	0.411466	Not assessed	Not assessed
7509	0.32966	0.215594	0.247707	0.161952	0.0450875	1:162397864:A:G	ENSG00000117143_UAP1.13580.2.3_sun_pQTL	ENSG00000117143_UAP1.13580.2.3_COVID_D1_h	rs164123	-0.606495	0.265845	-1.12754	-0.0854491	0.0225254	Not assessed	Not assessed
8180	2.00575e-21	0.653524	9.25164e-22	0.301396	0.0450795	4:56823294:C:T	ENSG00000128040_SPINK2.13405.61.3_sun_pQTL	ENSG00000128040_SPINK2.13405.61.3_COVID_D1_h	rs11941335	0.0962635	0.0937685	-0.0875194	0.280046	0.304605	Not assessed	Not assessed
5845	0.00158664	0.613355	0.000877319	0.339106	0.0450749	13:88146988:G:A	ENSG00000165300_SLITRK5.4568.17.2_sun_pQTL	ENSG00000165300_SLITRK5.4568.17.2_COVID_A1_h	rs1582815	0.756984	1.11249	-1.42346	2.93743	0.496225	Not assessed	Not assessed
6523	1.73461e-46	0.536661	1.35211e-46	0.418278	0.0450616	2:182838608:G:A	ENSG00000162998_FRZB.13740.51.3_sun_pQTL	ENSG00000162998_FRZB.13740.51.3_COVID_A1_h	rs288326	0.247922	0.469072	-0.671441	1.16729	0.597126	Not assessed	Not assessed
5683	0.122759	0.478892	0.0720937	0.281198	0.045057	11:72238799:TGAAG:T	ENSG00000184276_DEFB108B.5611.56.3_sun_pQTL	ENSG00000184276_DEFB108B.5611.56.3_COVID_A1_h	rs71726140	-1.92668	1.25774	-4.39181	0.538457	0.125559	Not assessed	Not assessed
6789	7.29873e-68	0.58157	4.68649e-68	0.373379	0.045051	11:125828759:T:A	ENSG00000237353_PATE4.8065.245.3_sun_pQTL	ENSG00000237353_PATE4.8065.245.3_COVID_A1_h	rs875500	-0.252625	0.328927	-0.89731	0.39206	0.442471	Not assessed	Not assessed
8064	1.90197e-15	0.547504	1.41561e-15	0.407456	0.04504	16:57360481:T:C	ENSG00000102962_CCL22.3508.78.3_sun_pQTL	ENSG00000102962_CCL22.3508.78.3_COVID_B1_h	rs41398344	-0.101645	0.167025	-0.429008	0.225718	0.542816	Not assessed	Not assessed
7822	2.95103e-57	0.6068	1.69347e-57	0.348171	0.0450287	17:1762959:C:T	ENSG00000132386_SERPINF1.7735.17.3_sun_pQTL	ENSG00000132386_SERPINF1.7735.17.3_COVID_D1_h	rs62088172	0.123494	0.0674323	-0.00867049	0.255659	0.0670434	Not assessed	Not assessed
4988	1.56986e-05	0.63286	7.99107e-06	0.322101	0.0450156	16:66408596:G:A	ENSG00000179776_CDH5.2819.23.2_sun_pQTL	ENSG00000179776_CDH5.2819.23.2_COVID_A1_h	rs2289150	0.706495	0.910478	-1.07801	2.491	0.437772	Not assessed	Not assessed
6379	3.13256e-14	0.657803	1.41546e-14	0.297187	0.04501	20:41361737:G:C	ENSG00000183798_EMILIN3.8773.172.3_sun_pQTL	ENSG00000183798_EMILIN3.8773.172.3_COVID_B1_h	rs61739314	0.151758	0.151393	-0.144967	0.448483	0.316146	Not assessed	Not assessed
5558	0.00747551	0.70069	0.00260613	0.244231	0.044997	9:34661759:CA:C	ENSG00000213927_CCL27.2192.63.10_sun_pQTL	ENSG00000213927_CCL27.2192.63.10_COVID_B1_h	rs11575583	0.210005	0.293619	-0.365477	0.785487	0.474467	Not assessed	Not assessed
5606	1.96938e-109	0.632118	1.00611e-109	0.322888	0.0449941	2:151280667:C:T	ENSG00000123610_TNFAIP6.5036.50.1_sun_pQTL	ENSG00000123610_TNFAIP6.5036.50.1_COVID_A1_h	rs289828	0.119372	0.288009	-0.445115	0.683859	0.678527	Not assessed	Not assessed
6399	8.66667e-05	0.601036	5.10301e-05	0.35385	0.0449759	4:1761247:G:A	ENSG00000068078_FGFR3.13669.6.3_sun_pQTL	ENSG00000068078_FGFR3.13669.6.3_COVID_A1_h	rs4533828	-0.39859	0.924561	-2.2107	1.41352	0.666386	Not assessed	Not assessed
6486	0.000997934	0.707171	0.000347946	0.246522	0.0449611	1:204179521:G:A	ENSG00000143839_REN.3396.54.2_sun_pQTL	ENSG00000143839_REN.3396.54.2_COVID_B2_h	rs193280350	-0.0137818	0.136433	-0.281186	0.253623	0.919539	Not assessed	Not assessed
8101	1.31437e-11	0.600893	7.74828e-12	0.354183	0.044924	6:7883235:C:T	ENSG00000239264_TXNDC5.11212.7.3_sun_pQTL	ENSG00000239264_TXNDC5.11212.7.3_COVID_A2_h	rs111331197	-0.071479	0.146089	-0.357807	0.214849	0.62464	Not assessed	Not assessed
5888	3.49527e-34	0.60311	2.04008e-34	0.351971	0.0449192	11:33736224:G:A	ENSG00000085063_CD59.11514.196.3_sun_pQTL	ENSG00000085063_CD59.11514.196.3_COVID_A1_h	rs2273121	-0.340138	0.46942	-1.26018	0.579908	0.468702	Not assessed	Not assessed
4798	3.96749e-08	0.737087	1.17373e-08	0.218013	0.0448993	8:85438822:G:C	ENSG00000164879_CA3.3799.11.2_sun_pQTL	ENSG00000164879_CA3.3799.11.2_COVID_A2_h	rs2072696	-0.250991	0.151973	-0.548853	0.0468709	0.0986266	Not assessed	Not assessed
7825	1.40109e-62	0.606745	8.04563e-63	0.348371	0.0448842	17:1762959:C:T	ENSG00000132386_SERPINF1.9211.19.3_sun_pQTL	ENSG00000132386_SERPINF1.9211.19.3_COVID_D1_h	rs62088172	0.118914	0.0649314	-0.00834893	0.246178	0.0670434	Not assessed	Not assessed
5145	1.5751e-258	0.63875	7.80248e-259	0.316369	0.0448813	1:116947639:G:T	ENSG00000134247_PTGFRN.12727.7.3_sun_pQTL	ENSG00000134247_PTGFRN.12727.7.3_COVID_A1_h	rs4233450	-0.0234016	0.195953	-0.407462	0.360659	0.904939	Not assessed	Not assessed
7221	1.11131e-89	0.606127	6.40038e-90	0.349042	0.0448312	15:80180184:C:T	ENSG00000103876_FAH.11424.4.3_sun_pQTL	ENSG00000103876_FAH.11424.4.3_COVID_B1_h	rs11555096	-0.0640459	0.0819486	-0.224662	0.0965704	0.434486	Not assessed	Not assessed
8133	0.045834	0.618315	0.0200873	0.27094	0.0448234	18:10477954:T:C	ENSG00000154856_APCDD1.6599.5.3_sun_pQTL	ENSG00000154856_APCDD1.6599.5.3_COVID_D1_h	rs490481	-0.434105	0.22428	-0.873685	0.00547535	0.0529227	Not assessed	Not assessed
5523	4.86549e-14	0.705245	1.72461e-14	0.249936	0.0448189	10:72089994:C:T	ENSG00000107742_SPOCK2.5491.12.3_sun_pQTL	ENSG00000107742_SPOCK2.5491.12.3_COVID_B1_h	rs1245540	-0.328251	0.186397	-0.693584	0.0370808	0.0782333	Not assessed	Not assessed
7895	0.0754709	0.481703	0.0539215	0.344116	0.044788	10:44374567:C:T	ENSG00000107562_CXCL12.3516.60.2_sun_pQTL	ENSG00000107562_CXCL12.3516.60.2_COVID_A1_h	rs266088	0.516293	1.3589	-2.1471	3.17968	0.703994	Not assessed	Not assessed
6650	2.22828e-08	0.558201	1.58502e-08	0.397014	0.0447852	8:41309972:T:C	ENSG00000104332_SFRP1.3221.54.1_sun_pQTL	ENSG00000104332_SFRP1.3221.54.1_COVID_A1_h	rs72643820	-0.720422	0.789551	-2.26791	0.82707	0.361535	Not assessed	Not assessed
7572	1.28498e-13	0.694084	4.83537e-14	0.261138	0.0447777	10:42857446:T:C	ENSG00000165731_RET.3220.40.2_sun_pQTL	ENSG00000165731_RET.3220.40.2_COVID_D1_h	rs2795507	-0.200383	0.120285	-0.436138	0.0353721	0.0957342	Not assessed	Not assessed
7659	2.56664e-06	0.274941	6.35103e-06	0.680286	0.0447636	12:47735896:A:G	ENSG00000111405_ENDOU.5656.53.3_sun_pQTL	ENSG00000111405_ENDOU.5656.53.3_COVID_A2_h	rs11168214	-0.406737	0.170051	-0.740031	-0.0734427	0.0167637	Not assessed	Not assessed
6935	2.16323e-15	0.706922	7.60012e-16	0.24832	0.0447573	1:159574140:C:T	ENSG00000132703_APCS.2474.54.5_sun_pQTL	ENSG00000132703_APCS.2474.54.5_COVID_C2_h	rs192768215	-0.145757	0.0683817	-0.279783	-0.0117316	0.0330459	Not assessed	Not assessed
6398	1.14032e-107	0.605318	6.59312e-108	0.349938	0.0447439	12:27774948:T:C	ENSG00000205693_MANSC4.9578.263.3_sun_pQTL	ENSG00000205693_MANSC4.9578.263.3_COVID_A1_h	rs36138811	0.164767	0.282776	-0.389464	0.718998	0.560111	Not assessed	Not assessed
6531	0.120797	0.0471387	0.56637	0.220971	0.0447236	12:7285409:T:A	ENSG00000111321_LTBR.2636.10.2_sun_pQTL	ENSG00000111321_LTBR.2636.10.2_COVID_C1_h	rs7980344	1.7537	0.376672	1.01543	2.49196	3.22774e-06	Not assessed	Not assessed
6950	1.22137e-10	0.637351	6.09352e-11	0.317935	0.0447136	3:120450401:C:T	ENSG00000163430_FSTL1.13112.179.3_sun_pQTL	ENSG00000163430_FSTL1.13112.179.3_COVID_B1_h	rs1147707	0.365031	0.247104	-0.119283	0.849345	0.139612	Not assessed	Not assessed
10493	0.230953	0.159942	0.333496	0.230911	0.0446973	8:16419670:G:A	ENSG00000078579_FGF20.2763.66.2_sun_pQTL	ENSG00000078579_FGF20.2763.66.2_COVID_B2_h	rs138325675	-1.39473	0.340542	-2.06218	-0.727282	4.21039e-05	Not assessed	Not assessed
5454	1.53384e-104	0.632886	7.81513e-105	0.322419	0.0446944	4:102692109:A:G	ENSG00000109323_MANBA.6382.17.3_sun_pQTL	ENSG00000109323_MANBA.6382.17.3_COVID_A1_h	rs227373	-0.184418	0.302097	-0.776517	0.407681	0.541557	Not assessed	Not assessed
6357	2.50941e-10	0.58911	1.5601e-10	0.366205	0.0446855	1:160792994:T:G	ENSG00000122224_LY9.3324.51.1_sun_pQTL	ENSG00000122224_LY9.3324.51.1_COVID_D1_h	rs12128261	-0.271029	0.139058	-0.543578	0.00151861	0.0512903	Not assessed	Not assessed
4591	4.63195e-09	0.732464	1.40964e-09	0.222866	0.0446699	6:170279566:C:T	ENSG00000198719_DLL1.5349.69.3_sun_pQTL	ENSG00000198719_DLL1.5349.69.3_COVID_B1_h	rs959025	0.316504	0.207478	-0.0901445	0.723153	0.127138	Not assessed	Not assessed
3317	1.36848e-70	0.804369	2.56924e-71	0.150971	0.0446605	7:143406124:G:A	ENSG00000146904_EPHA1.3431.54.2_sun_pQTL	ENSG00000146904_EPHA1.3431.54.2_COVID_B1_h	rs4421280	-0.0812832	0.0904637	-0.258589	0.0960224	0.36891	Not assessed	Not assessed
8273	0	0.520047	0	0.435299	0.0446535	3:190628271:A:G	ENSG00000196083_IL1RAP.14048.7.3_sun_pQTL	ENSG00000196083_IL1RAP.14048.7.3_COVID_A1_h	rs6444442	0.13199	0.16216	-0.185838	0.449817	0.415675	Not assessed	Not assessed
7039	3.22845e-11	0.616087	1.77813e-11	0.339277	0.0446356	20:24995199:A:C	ENSG00000101474_APMAP.10605.22.3_sun_pQTL	ENSG00000101474_APMAP.10605.22.3_COVID_A2_h	rs8125909	-0.213573	0.13756	-0.483185	0.0560397	0.120524	Not assessed	Not assessed
8270	0	0.520088	0	0.435289	0.0446236	3:190628271:A:G	ENSG00000196083_IL1RAP.2630.12.2_sun_pQTL	ENSG00000196083_IL1RAP.2630.12.2_COVID_A1_h	rs6444442	0.129059	0.158559	-0.181712	0.43983	0.415675	Not assessed	Not assessed
7302	7.38657e-110	0.567432	5.05089e-110	0.387963	0.0446048	19:51081659:G:A	ENSG00000129437_KLK14.8620.56.3_sun_pQTL	ENSG00000129437_KLK14.8620.56.3_COVID_A1_h	rs2569491	-0.240146	0.308297	-0.844397	0.364105	0.436013	Not assessed	Not assessed
6539	0.290015	0.26183	0.212111	0.191453	0.0445904	3:186672838:C:T	ENSG00000157005_SST.5957.30.3_sun_pQTL	ENSG00000157005_SST.5957.30.3_COVID_A1_h	rs9898	-2.62627	1.43511	-5.43902	0.186493	0.0672479	Not assessed	Not assessed
4437	1.41032e-38	0.772328	3.3449e-39	0.183131	0.0445408	1:196334759:T:C	ENSG00000134389_CFHR5.7885.17.3_sun_pQTL	ENSG00000134389_CFHR5.7885.17.3_COVID_D1_h	rs72732234	0.0539272	0.0626035	-0.0687734	0.176628	0.389013	Not assessed	Not assessed
6378	0.193996	0.407017	0.114435	0.240047	0.0445048	2:102049091:C:A	ENSG00000115590_IL1R2.5666.64.3_sun_pQTL	ENSG00000115590_IL1R2.5666.64.3_COVID_B1_h	rs7607548	-0.88519	0.388397	-1.64643	-0.123946	0.0226619	Not assessed	Not assessed
5416	1.56683e-61	0.656699	7.13041e-62	0.298809	0.044492	15:51672668:T:C	ENSG00000104112_SCG3.7957.2.3_sun_pQTL	ENSG00000104112_SCG3.7957.2.3_COVID_A1_h	rs1378892	-0.161531	0.347222	-0.842074	0.519012	0.641782	Not assessed	Not assessed
7267	0.323727	0.360767	0.128201	0.142825	0.04448	19:48609736:G:A	ENSG00000087076_HSD17B14.13972.4.3_sun_pQTL	ENSG00000087076_HSD17B14.13972.4.3_COVID_B2_h	rs35021560	0.571806	0.209609	0.16098	0.982632	0.00637263	Not assessed	Not assessed
6364	4.15698e-138	0.604546	2.41372e-138	0.350981	0.044473	4:991939:A:G	ENSG00000127415_IDUA.3169.70.2_sun_pQTL	ENSG00000127415_IDUA.3169.70.2_COVID_A1_h	rs3822020	-0.202286	0.263076	-0.717905	0.313333	0.441936	Not assessed	Not assessed
4100	0.0757643	0.596359	0.0319524	0.251461	0.0444632	17:42112643:C:G	ENSG00000108771_DHX58.14012.17.3_sun_pQTL	ENSG00000108771_DHX58.14012.17.3_COVID_A1_h	rs2277621	-0.258673	1.14496	-2.50276	1.98541	0.821261	Not assessed	Not assessed
4492	3.01831e-52	0.737184	8.94218e-53	0.218357	0.0444594	1:196998224:G:A	ENSG00000134389_CFHR5.3666.17.4_sun_pQTL	ENSG00000134389_CFHR5.3666.17.4_COVID_B1_h	rs35662416	0.0530045	0.112206	-0.166916	0.272925	0.636652	Not assessed	Not assessed
7282	5.80558e-24	0.614129	3.22799e-24	0.341421	0.0444503	4:176729712:C:T	ENSG00000150630_VEGFC.3132.1.1_sun_pQTL	ENSG00000150630_VEGFC.3132.1.1_COVID_B1_h	rs41278571	-0.0333946	0.115411	-0.259596	0.192807	0.772311	Not assessed	Not assessed
6702	1.12518e-42	0.710821	3.87469e-43	0.244735	0.044444	20:58997654:A:G	ENSG00000101160_CTSZ.4971.1.1_sun_pQTL	ENSG00000101160_CTSZ.4971.1.1_COVID_C1_h	rs199825459	-0.0415422	0.0457087	-0.13113	0.0480452	0.363431	Not assessed	Not assessed
6834	0.001284	0.56368	0.00088794	0.389764	0.0443847	5:34020253:T:C	ENSG00000082196_C1QTNF3.7251.64.3_sun_pQTL	ENSG00000082196_C1QTNF3.7251.64.3_COVID_A1_h	rs840385	-1.54216	1.11231	-3.72225	0.63793	0.16561	Not assessed	Not assessed
6489	1.04709e-37	0.599743	6.21396e-38	0.355874	0.0443827	2:108986407:T:C	ENSG00000135960_EDAR.2977.7.2_sun_pQTL	ENSG00000135960_EDAR.2977.7.2_COVID_B1_h	rs116475987	0.0489824	0.128115	-0.202119	0.300084	0.702217	Not assessed	Not assessed
7545	0	0.554242	0	0.401415	0.0443429	19:54255498:T:C	ENSG00000105609_LILRB5.7015.8.3_sun_pQTL	ENSG00000105609_LILRB5.7015.8.3_COVID_A1_h	rs12975366	0.1224	0.128603	-0.129658	0.374458	0.341216	Not assessed	Not assessed
5594	7.50616e-156	0.623823	3.99341e-156	0.331841	0.0443363	17:50838798:G:A	ENSG00000173714_WFIKKN2.13408.23.3_sun_pQTL	ENSG00000173714_WFIKKN2.13408.23.3_COVID_A1_h	rs7225465	0.166861	0.239354	-0.302265	0.635986	0.485722	Not assessed	Not assessed
7748	2.0656e-248	0.632229	1.05692e-248	0.323452	0.0443185	21:36148374:G:A	ENSG00000159231_CBR3.14091.42.3_sun_pQTL	ENSG00000159231_CBR3.14091.42.3_COVID_A2_h	rs4510305	0.0689764	0.03718	-0.00389516	0.141848	0.0635678	Not assessed	Not assessed
5826	1.352e-05	0.613366	7.5464e-06	0.342316	0.044297	12:6707118:G:T	ENSG00000139200_PIANP.14114.18.3_sun_pQTL	ENSG00000139200_PIANP.14114.18.3_COVID_A1_h	rs7485433	0.185703	1.17453	-2.11634	2.48775	0.874372	Not assessed	Not assessed
5501	0.00632081	0.608549	0.00350426	0.337336	0.0442905	12:7452506:A:G	ENSG00000177575_CD163.5028.59.1_sun_pQTL	ENSG00000177575_CD163.5028.59.1_COVID_A1_h	rs79284771	0.578358	1.3139	-1.99684	3.15356	0.659804	Not assessed	Not assessed
6767	0.297952	0.156472	0.32871	0.17258	0.0442857	8:78641052:A:T	ENSG00000104435_STMN2.10900.272.3_sun_pQTL	ENSG00000104435_STMN2.10900.272.3_COVID_C2_h	rs62517724	1.34511	0.308722	0.740026	1.9502	1.31842e-05	Not assessed	Not assessed
6543	5.87928e-13	0.673892	2.45927e-13	0.281841	0.044267	5:180630293:T:C	ENSG00000037280_FLT4.2358.19.2_sun_pQTL	ENSG00000037280_FLT4.2358.19.2_COVID_A2_h	rs34221241	-0.240091	0.193058	-0.618477	0.138296	0.213639	Not assessed	Not assessed
7771	2.16585e-24	0.551871	1.58527e-24	0.403891	0.0442382	21:21453092:A:T	ENSG00000154654_NCAM2.6507.16.3_sun_pQTL	ENSG00000154654_NCAM2.6507.16.3_COVID_A1_h	rs34399466	-0.314746	0.717642	-1.7213	1.09181	0.660963	Not assessed	Not assessed
6872	4.80176e-62	0.5918	2.95365e-62	0.363983	0.0442172	6:73794007:G:A	ENSG00000156535_CD109.3290.50.2_sun_pQTL	ENSG00000156535_CD109.3290.50.2_COVID_A1_h	rs6903575	-0.304221	0.369658	-1.02874	0.420294	0.410519	Not assessed	Not assessed
5823	0.412333	0.269568	0.165653	0.108254	0.0441931	9:73552087:G:C	ENSG00000135046_ANXA1.4960.72.1_sun_pQTL	ENSG00000135046_ANXA1.4960.72.1_COVID_B1_h	rs76957447	-1.55951	0.564813	-2.66652	-0.452497	0.00576054	Not assessed	Not assessed
4326	0.267999	0.40777	0.11108	0.168968	0.044184	16:68762843:A:G	ENSG00000039068_CDH1.2501.51.3_sun_pQTL	ENSG00000039068_CDH1.2501.51.3_COVID_A1_h	rs35158985	-0.390512	1.70512	-3.73249	2.95146	0.818851	Not assessed	Not assessed
4225	0	0.671434	0	0.284438	0.0441279	16:153255:A:G	ENSG00000130656_HBZ.6919.3.3_sun_pQTL	ENSG00000130656_HBZ.6919.3.3_COVID_A1_h	rs2461286	0.0897592	0.170179	-0.243785	0.423303	0.597887	Not assessed	Not assessed
6339	3.81068e-19	0.601274	2.24769e-19	0.35461	0.0441163	11:9748015:C:G	ENSG00000133789_SWAP70.13552.7.3_sun_pQTL	ENSG00000133789_SWAP70.13552.7.3_COVID_A1_h	rs415895	0.383264	0.58334	-0.76006	1.52659	0.51117	Not assessed	Not assessed
5024	0.0146407	0.685609	0.00534571	0.250289	0.0441157	2:162182309:C:T	ENSG00000078098_FAP.5029.3.1_sun_pQTL	ENSG00000078098_FAP.5029.3.1_COVID_A2_h	rs78034415	-0.459428	0.266297	-0.98136	0.0625047	0.0844831	Not assessed	Not assessed
7502	9.55551e-32	0.624156	5.07971e-32	0.331757	0.0440873	12:42142262:G:A	ENSG00000151233_GXYLT1.8229.1.3_sun_pQTL	ENSG00000151233_GXYLT1.8229.1.3_COVID_B1_h	rs67420641	-0.243525	0.142147	-0.522128	0.0350788	0.0866783	Not assessed	Not assessed
6643	0	0.689044	0	0.266881	0.0440756	10:88766035:C:T	ENSG00000204020_LIPN.8097.77.3_sun_pQTL	ENSG00000204020_LIPN.8097.77.3_COVID_D1_h	rs10509554	0.0502341	0.0288549	-0.00632042	0.106789	0.0816972	Not assessed	Not assessed
6004	0.412553	0.213971	0.216938	0.112471	0.0440671	11:118974525:T:C	ENSG00000256269_HMBS.11530.37.3_sun_pQTL	ENSG00000256269_HMBS.11530.37.3_COVID_C1_h	rs117489749	-1.61615	0.418912	-2.4372	-0.795099	0.000114332	Not assessed	Not assessed
8349	1.1042e-12	0.532262	8.79029e-13	0.423679	0.044059	19:51627384:T:A	ENSG00000254415_SIGLEC14.5125.6.3_sun_pQTL	ENSG00000254415_SIGLEC14.5125.6.3_COVID_A1_h	rs1106476	-0.522622	0.748022	-1.98872	0.943474	0.484757	Not assessed	Not assessed
7768	5.45144e-06	0.583894	3.47403e-06	0.372052	0.0440455	12:47738376:A:T	ENSG00000111405_ENDOU.5656.53.3_sun_pQTL	ENSG00000111405_ENDOU.5656.53.3_COVID_B1_h	rs10875685	-0.37627	0.246114	-0.858645	0.106104	0.126303	Not assessed	Not assessed
5042	0.0636328	0.580204	0.0308528	0.281272	0.0440381	5:83677577:T:C	ENSG00000145681_HAPLN1.3196.6.2_sun_pQTL	ENSG00000145681_HAPLN1.3196.6.2_COVID_A1_h	rs336958	0.808674	1.16953	-1.48357	3.10092	0.489283	Not assessed	Not assessed
3834	0.028327	0.733551	0.00721866	0.186889	0.0440144	1:150790400:A:G	ENSG00000143384_MCL1.10358.33.3_sun_pQTL	ENSG00000143384_MCL1.10358.33.3_COVID_B2_h	rs11582441	-0.181582	0.184841	-0.543864	0.180701	0.32592	Not assessed	Not assessed
8468	0	0.618276	0	0.337735	0.0439886	16:1244024:A:G	ENSG00000197253_TPSB2.3403.1.2_sun_pQTL	ENSG00000197253_TPSB2.3403.1.2_COVID_A2_h	rs2745084	-0.061604	0.0369366	-0.133998	0.0107904	0.0953494	Not assessed	Not assessed
5558	5.28966e-07	0.651704	2.4705e-07	0.30433	0.0439658	11:16835018:C:T	ENSG00000166689_PLEKHA7.12731.12.3_sun_pQTL	ENSG00000166689_PLEKHA7.12731.12.3_COVID_B1_h	rs370053	0.307429	0.229659	-0.142695	0.757553	0.180692	Not assessed	Not assessed
7705	0.27306	0.319661	0.167402	0.195927	0.0439505	20:56571970:C:T	ENSG00000087586_AURKA.3091.70.2_sun_pQTL	ENSG00000087586_AURKA.3091.70.2_COVID_B2_h	rs8124954	3.53538	0.85434	1.8609	5.20985	3.50132e-05	Not assessed	Not assessed
5013	0.0122363	0.642746	0.00562542	0.295447	0.0439449	1:113979061:A:AAAC	ENSG00000116774_OLFML3.8660.5.3_sun_pQTL	ENSG00000116774_OLFML3.8660.5.3_COVID_A1_h	rs3841011	-1.04071	1.55274	-4.08402	2.0026	0.502705	Not assessed	Not assessed
5701	1.35736e-13	0.625885	7.16178e-14	0.330189	0.0439257	15:88924223:G:A	ENSG00000140545_MFGE8.4455.89.2_sun_pQTL	ENSG00000140545_MFGE8.4455.89.2_COVID_A1_h	rs1961839	-0.572703	0.662983	-1.87213	0.726719	0.387682	Not assessed	Not assessed
5582	5.45219e-13	0.629969	2.82277e-13	0.326112	0.0439193	1:156913754:A:G	ENSG00000187800_PEAR1.8275.31.3_sun_pQTL	ENSG00000187800_PEAR1.8275.31.3_COVID_A1_h	rs12137505	0.340157	0.665229	-0.963668	1.64398	0.609114	Not assessed	Not assessed
7743	4.91484e-06	0.730554	1.51752e-06	0.225524	0.0439159	11:126201454:G:T	ENSG00000150455_TIRAP.9839.148.3_sun_pQTL	ENSG00000150455_TIRAP.9839.148.3_COVID_C1_h	rs111577916	0.146618	0.108411	-0.0658629	0.359099	0.176237	Not assessed	Not assessed
7372	0.347237	0.327047	0.145143	0.136659	0.0439143	5:44056047:TG:T	ENSG00000112972_HMGCS1.13496.19.3_sun_pQTL	ENSG00000112972_HMGCS1.13496.19.3_COVID_C1_h	rs148328030	0.491569	0.188155	0.122792	0.860345	0.00898627	Not assessed	Not assessed
6392	1.50043e-225	0.576445	9.88317e-226	0.379655	0.0439008	19:14042481:T:C	ENSG00000104998_IL27RA.5132.71.3_sun_pQTL	ENSG00000104998_IL27RA.5132.71.3_COVID_A1_h	rs35026308	0.0741937	0.236227	-0.388803	0.53719	0.753462	Not assessed	Not assessed
5698	0.0217079	0.697611	0.00714722	0.229641	0.043893	11:45711342:C:T	ENSG00000175264_CHST1.7803.4.3_sun_pQTL	ENSG00000175264_CHST1.7803.4.3_COVID_C2_h	rs4756020	0.158392	0.09333	-0.024531	0.341316	0.0896736	Not assessed	Not assessed
5651	0.171683	0.379187	0.126314	0.27894	0.0438759	5:95555635:TC:T	ENSG00000164291_ARSK.8269.327.3_sun_pQTL	ENSG00000164291_ARSK.8269.327.3_COVID_B1_h	rs17552010	-0.917303	0.356591	-1.61621	-0.218398	0.0100988	Not assessed	Not assessed
7787	6.16509e-74	0.631694	3.16674e-74	0.32443	0.0438754	11:20933724:G:A	ENSG00000165973_NELL1.6544.33.3_sun_pQTL	ENSG00000165973_NELL1.6544.33.3_COVID_D1_h	rs61652119	-0.0775644	0.0569526	-0.189189	0.0340606	0.173226	Not assessed	Not assessed
6632	1.29176e-23	0.590968	7.98343e-24	0.365189	0.0438434	14:69888141:A:C	ENSG00000198732_SMOC1.13118.5.3_sun_pQTL	ENSG00000198732_SMOC1.13118.5.3_COVID_A1_h	rs1958078	-0.170746	0.560186	-1.26869	0.927198	0.760516	Not assessed	Not assessed
5895	5.84848e-13	0.715919	1.96312e-13	0.240264	0.0438172	15:65400920:C:T	ENSG00000103742_IGDCC4.9793.145.3_sun_pQTL	ENSG00000103742_IGDCC4.9793.145.3_COVID_C2_h	rs35223184	0.0795368	0.0644291	-0.046742	0.205816	0.217022	Not assessed	Not assessed
5780	5.50671e-51	0.6841	2.19065e-51	0.272102	0.0437983	11:108486410:G:A	ENSG00000178202_KDELC2.8296.117.3_sun_pQTL	ENSG00000178202_KDELC2.8296.117.3_COVID_B1_h	rs74911261	-0.0546262	0.111404	-0.272974	0.163721	0.62389	Not assessed	Not assessed
7157	0.432548	0.182686	0.239755	0.101217	0.0437938	17:8226706:C:T	ENSG00000004975_DVL2.13575.40.3_sun_pQTL	ENSG00000004975_DVL2.13575.40.3_COVID_B1_h	rs78517666	1.91681	0.543186	0.852189	2.98144	0.000417391	Not assessed	Not assessed
4873	0.28364	0.373156	0.129333	0.170106	0.043764	22:41793547:A:G	ENSG00000100147_CCDC134.5587.3.3_sun_pQTL	ENSG00000100147_CCDC134.5587.3.3_COVID_A1_h	rs139558	2.89822	1.58511	-0.208542	6.00498	0.0674894	Not assessed	Not assessed
4292	3.19158e-55	0.641621	1.56527e-55	0.314632	0.0437473	17:36020201:T:C	ENSG00000274736_CCL23.3028.36.2_sun_pQTL	ENSG00000274736_CCL23.3028.36.2_COVID_A1_h	rs6505501	0.0803349	0.344502	-0.594876	0.755545	0.815613	Not assessed	Not assessed
4970	4.5016e-14	0.638116	2.24468e-14	0.318147	0.0437371	10:72089994:C:T	ENSG00000107742_SPOCK2.5491.12.3_sun_pQTL	ENSG00000107742_SPOCK2.5491.12.3_COVID_A1_h	rs1245540	0.529188	0.669986	-0.783961	1.84234	0.429616	Not assessed	Not assessed
7714	1.23439e-92	0.526558	1.00752e-92	0.429739	0.043703	4:75927078:C:T	ENSG00000138744_NAAA.3173.49.2_sun_pQTL	ENSG00000138744_NAAA.3173.49.2_COVID_C1_h	rs9996608	0.0664485	0.0317046	0.00430853	0.128588	0.0360946	Not assessed	Not assessed
6960	1.27912e-19	0.582497	8.20933e-20	0.373801	0.0437024	4:95522902:A:T	ENSG00000182168_UNC5C.5139.32.3_sun_pQTL	ENSG00000182168_UNC5C.5139.32.3_COVID_A1_h	rs57091121	-0.517892	0.682108	-1.8548	0.819016	0.447702	Not assessed	Not assessed
5533	8.02418e-14	0.625137	4.25156e-14	0.331181	0.0436817	9:99005103:A:G	ENSG00000204291_COL15A1.8974.172.3_sun_pQTL	ENSG00000204291_COL15A1.8974.172.3_COVID_A1_h	rs41305481	0.2662	0.637382	-0.983046	1.51545	0.676206	Not assessed	Not assessed
4838	1.78446e-167	0.658218	8.08287e-168	0.298102	0.0436802	4:73877758:T:C	ENSG00000163739_CXCL1.2985.35.1_sun_pQTL	ENSG00000163739_CXCL1.2985.35.1_COVID_A1_h	rs3097409	-0.0959489	0.215145	-0.517625	0.325727	0.655616	Not assessed	Not assessed
5419	0.301582	0.32377	0.159652	0.171355	0.0436414	1:7557711:G:A	ENSG00000116288_PARK7.9845.33.3_sun_pQTL	ENSG00000116288_PARK7.9845.33.3_COVID_A1_h	rs1075368	1.77737	1.42723	-1.01994	4.57468	0.21301	Not assessed	Not assessed
6724	0.411685	0.302403	0.139714	0.102583	0.0436152	9:98332390:T:C	ENSG00000136938_ANP32B.4194.26.3_sun_pQTL	ENSG00000136938_ANP32B.4194.26.3_COVID_C2_h	rs28653687	-0.527769	0.147571	-0.817003	-0.238534	0.000348406	Not assessed	Not assessed
7196	3.69698e-11	0.720015	1.214e-11	0.236393	0.0435916	20:24992870:T:G	ENSG00000101474_APMAP.10605.22.3_sun_pQTL	ENSG00000101474_APMAP.10605.22.3_COVID_C1_h	rs6138457	-0.193515	0.0779352	-0.346265	-0.0407653	0.013027	Not assessed	Not assessed
4848	1.08113e-76	0.657295	4.9206e-77	0.299115	0.04359	4:73853224:C:A	ENSG00000109272_PF4V1.5663.18.3_sun_pQTL	ENSG00000109272_PF4V1.5663.18.3_COVID_A1_h	rs941758	0.131643	0.32854	-0.512283	0.775568	0.688648	Not assessed	Not assessed
6332	8.76543e-18	0.380188	1.32863e-17	0.576231	0.0435814	1:63653675:T:C	ENSG00000079739_PGM1.9173.21.3_sun_pQTL	ENSG00000079739_PGM1.9173.21.3_COVID_B2_h	rs2269233	0.189609	0.0820937	0.0287084	0.35051	0.0209066	Not assessed	Not assessed
4593	0.17058	0.596851	0.0420228	0.146992	0.0435547	16:67939604:A:G	ENSG00000167261_DPEP2.8327.26.3_sun_pQTL	ENSG00000167261_DPEP2.8327.26.3_COVID_C1_h	rs17240406	0.0634277	0.0365824	-0.00827255	0.135128	0.0829484	Not assessed	Not assessed
6037	0.0109632	0.589494	0.00650048	0.349488	0.0435543	12:6868111:T:C	ENSG00000111669_TPI1.4309.59.3_sun_pQTL	ENSG00000111669_TPI1.4309.59.3_COVID_A1_h	rs2071066	0.134106	1.33421	-2.48089	2.74911	0.919936	Not assessed	Not assessed
8742	0.0833559	0.538986	0.044758	0.289365	0.0435351	10:44944658:C:T	ENSG00000107562_CXCL12.3516.60.2_sun_pQTL	ENSG00000107562_CXCL12.3516.60.2_COVID_B2_h	rs10900134	-0.821717	0.240351	-1.2928	-0.350637	0.000628946	Not assessed	Not assessed
6334	1.40548e-12	0.573745	9.37644e-13	0.382721	0.0435333	2:128326851:C:T	ENSG00000136720_HS6ST1.5465.32.3_sun_pQTL	ENSG00000136720_HS6ST1.5465.32.3_COVID_A1_h	rs34827544	-0.17665	0.689304	-1.52766	1.17436	0.79774	Not assessed	Not assessed
6003	4.08031e-13	0.686647	1.60363e-13	0.26982	0.0435327	17:68659675:G:A	ENSG00000108950_FAM20A.6433.57.3_sun_pQTL	ENSG00000108950_FAM20A.6433.57.3_COVID_B2_h	rs929477	0.191326	0.104149	-0.012801	0.395454	0.0662021	Not assessed	Not assessed
4633	0.0267633	0.722568	0.00740003	0.199746	0.0435227	3:52476576:G:A	ENSG00000010322_NISCH.12738.43.3_sun_pQTL	ENSG00000010322_NISCH.12738.43.3_COVID_B2_h	rs9856575	0.0880209	0.187641	-0.279748	0.45579	0.639003	Not assessed	Not assessed
6883	4.78183e-54	0.570225	3.23945e-54	0.386256	0.0435183	7:145681495:G:C	ENSG00000174469_CNTNAP2.6965.19.3_sun_pQTL	ENSG00000174469_CNTNAP2.6965.19.3_COVID_A1_h	rs10274393	-0.257687	0.389081	-1.02027	0.504898	0.507782	Not assessed	Not assessed
6942	0.0246226	0.528873	0.0179302	0.385082	0.0434922	12:10178500:G:A	ENSG00000173391_OLR1.3636.37.4_sun_pQTL	ENSG00000173391_OLR1.3636.37.4_COVID_A1_h	rs9738986	-0.819305	1.27802	-3.32417	1.68556	0.521474	Not assessed	Not assessed
7446	0.0375549	0.507579	0.0283442	0.383047	0.0434751	19:2190948:TTGG:T	ENSG00000099622_CIRBP.12724.81.3_sun_pQTL	ENSG00000099622_CIRBP.12724.81.3_COVID_A1_h	rs35301355	-0.831031	1.5941	-3.95541	2.29334	0.602146	Not assessed	Not assessed
3765	3.02572e-28	0.68272	1.21367e-28	0.273807	0.0434734	10:75101922:T:C	ENSG00000079393_DUSP13.6525.17.3_sun_pQTL	ENSG00000079393_DUSP13.6525.17.3_COVID_A1_h	rs6480771	0.195972	0.49519	-0.774583	1.16653	0.692289	Not assessed	Not assessed
5035	0.00086227	0.665197	0.000376105	0.290102	0.0434623	12:55969882:C:A	ENSG00000185664_PMEL.6472.40.3_sun_pQTL	ENSG00000185664_PMEL.6472.40.3_COVID_A2_h	rs3213122	-0.34333	0.256175	-0.845423	0.158764	0.180175	Not assessed	Not assessed
6192	0.319452	0.161237	0.31627	0.159588	0.043454	14:74001910:C:T	ENSG00000119725_ZNF410.12843.6.3_sun_pQTL	ENSG00000119725_ZNF410.12843.6.3_COVID_D1_h	rs4903168	-0.861488	0.293899	-1.43752	-0.285456	0.00337616	Not assessed	Not assessed
7021	0.0406618	0.679051	0.0133832	0.223456	0.0434487	1:236067017:G:A	ENSG00000116962_NID1.3213.65.2_sun_pQTL	ENSG00000116962_NID1.3213.65.2_COVID_D1_h	rs76183323	0.143144	0.186262	-0.221922	0.508211	0.442183	Not assessed	Not assessed
6675	0.000231203	0.625738	0.000122118	0.330461	0.043447	1:179020329:G:A	ENSG00000116199_FAM20B.7198.197.3_sun_pQTL	ENSG00000116199_FAM20B.7198.197.3_COVID_D1_h	rs7520456	0.369228	0.181075	0.0143274	0.724129	0.0414413	Not assessed	Not assessed
7537	1.20519e-08	0.704987	4.30151e-09	0.251576	0.0434365	11:124756673:G:A	ENSG00000149564_ESAM.7841.84.3_sun_pQTL	ENSG00000149564_ESAM.7841.84.3_COVID_C2_h	rs61753651	0.0184832	0.0852156	-0.148536	0.185503	0.828287	Not assessed	Not assessed
7811	5.06876e-79	0.5663	3.49351e-79	0.390264	0.0434358	1:169696410:G:T	ENSG00000188404_SELL.4831.4.2_sun_pQTL	ENSG00000188404_SELL.4831.4.2_COVID_B1_h	rs4987358	0.143144	0.0834637	-0.0204416	0.30673	0.0863364	Not assessed	Not assessed
5899	0.157186	0.0623199	0.527856	0.209236	0.0434013	17:49863303:C:T	ENSG00000121067_SPOP.13727.44.3_sun_pQTL	ENSG00000121067_SPOP.13727.44.3_COVID_A2_h	rs77534576	-4.01563	0.814292	-5.61162	-2.41965	8.16235e-07	Not assessed	Not assessed
5897	2.99767e-248	0.608907	1.71197e-248	0.347704	0.0433884	19:10289434:G:C	ENSG00000105376_ICAM5.8245.27.3_sun_pQTL	ENSG00000105376_ICAM5.8245.27.3_COVID_A1_h	rs281439	-0.0791455	0.212335	-0.495314	0.337023	0.709342	Not assessed	Not assessed
6748	0.233026	0.327453	0.164716	0.231419	0.0433864	6:41394726:C:T	ENSG00000096264_NCR2.2734.49.4_sun_pQTL	ENSG00000096264_NCR2.2734.49.4_COVID_A1_h	rs4711673	2.82195	1.3622	0.152085	5.49181	0.0383018	Not assessed	Not assessed
8501	3.82709e-22	0.556081	2.75695e-22	0.400545	0.0433741	14:94530397:GT:G	ENSG00000165953_SERPINA12.6551.94.3_sun_pQTL	ENSG00000165953_SERPINA12.6551.94.3_COVID_B1_h	rs34825443	-0.28237	0.183951	-0.642907	0.0781671	0.124777	Not assessed	Not assessed
8035	1.05505e-08	0.677863	4.33953e-09	0.278769	0.0433672	17:81231621:G:A	ENSG00000167302_ENTHD2.7947.19.3_sun_pQTL	ENSG00000167302_ENTHD2.7947.19.3_COVID_A2_h	rs61745945	0.0475947	0.17922	-0.30367	0.398859	0.790574	Not assessed	Not assessed
7430	1.39668e-151	0.566584	9.61649e-152	0.390062	0.0433539	14:94290413:T:C	ENSG00000140093_SERPINA10.13119.26.3_sun_pQTL	ENSG00000140093_SERPINA10.13119.26.3_COVID_A1_h	rs941591	-0.121054	0.247879	-0.606888	0.36478	0.625296	Not assessed	Not assessed
7183	5.30251e-98	0.621815	2.85564e-98	0.334832	0.0433532	4:24800212:C:G	ENSG00000109610_SOD3.8463.2.3_sun_pQTL	ENSG00000109610_SOD3.8463.2.3_COVID_B1_h	rs1799895	0.0139528	0.0832306	-0.149176	0.177082	0.866866	Not assessed	Not assessed
6593	4.07399e-14	0.568119	2.78676e-14	0.388571	0.04331	13:113137856:T:A	ENSG00000126218_F10.4878.3.1_sun_pQTL	ENSG00000126218_F10.4878.3.1_COVID_A1_h	rs547138	0.0212375	0.654095	-1.26077	1.30324	0.974098	Not assessed	Not assessed
5439	7.81027e-08	0.643367	3.8046e-08	0.313358	0.0432749	15:50072644:T:C	ENSG00000140285_FGF7.14031.18.3_sun_pQTL	ENSG00000140285_FGF7.14031.18.3_COVID_A1_h	rs7162172	-0.73583	0.87694	-2.4546	0.98294	0.40142	Not assessed	Not assessed
8632	0.0397967	0.542591	0.0255828	0.348754	0.0432747	19:2109989:A:T	ENSG00000099622_CIRBP.12724.81.3_sun_pQTL	ENSG00000099622_CIRBP.12724.81.3_COVID_B1_h	rs77265501	0.952102	0.461254	0.0480602	1.85614	0.0390027	Not assessed	Not assessed
6196	0.0485849	0.546027	0.0295913	0.332522	0.0432747	5:38541051:T:G	ENSG00000113594_LIFR.5837.49.3_sun_pQTL	ENSG00000113594_LIFR.5837.49.3_COVID_A1_h	rs13181677	-0.794175	1.24578	-3.23585	1.6475	0.523803	Not assessed	Not assessed
6056	2.85114e-46	0.580053	1.85171e-46	0.376679	0.0432677	3:12035510:T:C	ENSG00000157150_TIMP4.6462.12.3_sun_pQTL	ENSG00000157150_TIMP4.6462.12.3_COVID_A1_h	rs454615	0.0162951	0.430308	-0.827093	0.859683	0.969793	Not assessed	Not assessed
6552	0.141871	0.485776	0.074398	0.2547	0.0432548	1:58943480:G:A	ENSG00000177606_JUN.10356.21.3_sun_pQTL	ENSG00000177606_JUN.10356.21.3_COVID_A2_h	rs72680107	0.603474	0.339265	-0.0614737	1.26842	0.0752779	Not assessed	Not assessed
6194	0.142933	0.461561	0.0833016	0.268955	0.0432485	2:31959864:T:A	ENSG00000162961_DPY30.13943.38.3_sun_pQTL	ENSG00000162961_DPY30.13943.38.3_COVID_A1_h	rs17011716	-1.2675	1.38936	-3.99059	1.45559	0.361614	Not assessed	Not assessed
7488	1.29069e-124	0.556805	9.27222e-125	0.399962	0.0432332	19:54265512:G:A	ENSG00000131042_LILRB2.5633.65.3_sun_pQTL	ENSG00000131042_LILRB2.5633.65.3_COVID_A1_h	rs12984029	-0.196417	0.248041	-0.682568	0.289734	0.428435	Not assessed	Not assessed
5557	0.0996827	0.5235	0.0533669	0.280222	0.0432286	20:45485639:C:T	ENSG00000101443_WFDC2.11388.75.3_sun_pQTL	ENSG00000101443_WFDC2.11388.75.3_COVID_A1_h	rs6032226	-0.911728	1.29956	-3.45882	1.63536	0.482949	Not assessed	Not assessed
8240	0	0.49568	0	0.461118	0.0432024	19:51225221:C:T	ENSG00000105383_CD33.3166.92.1_sun_pQTL	ENSG00000105383_CD33.3166.92.1_COVID_B2_h	rs12459419	0.0493578	0.0242666	0.00179604	0.0969195	0.0419539	Not assessed	Not assessed
4015	3.20277e-22	0.680353	1.30173e-22	0.276479	0.043168	6:127134676:A:C	ENSG00000146374_RSPO3.13094.75.3_sun_pQTL	ENSG00000146374_RSPO3.13094.75.3_COVID_A1_h	rs2489623	-0.296959	0.547556	-1.37015	0.77623	0.587587	Not assessed	Not assessed
7575	3.83098e-06	0.570227	2.59761e-06	0.386602	0.0431652	11:126201454:G:T	ENSG00000150455_TIRAP.9839.148.3_sun_pQTL	ENSG00000150455_TIRAP.9839.148.3_COVID_A2_h	rs111577916	-0.20601	0.178027	-0.554937	0.142916	0.247197	Not assessed	Not assessed
6085	9.84651e-25	0.633425	5.02843e-25	0.323436	0.0431395	3:58664229:T:C	ENSG00000198643_FAM3D.13102.1.3_sun_pQTL	ENSG00000198643_FAM3D.13102.1.3_COVID_B2_h	rs12493106	-0.155318	0.0641137	-0.280978	-0.0296575	0.0154124	Not assessed	Not assessed
5105	5.20737e-21	0.648644	2.47481e-21	0.308226	0.0431306	3:43106160:C:T	ENSG00000144647_POMGNT2.6359.50.3_sun_pQTL	ENSG00000144647_POMGNT2.6359.50.3_COVID_A1_h	rs729654	0.243175	0.628465	-0.988595	1.47494	0.698805	Not assessed	Not assessed
7356	5.8372e-64	0.563372	4.07789e-64	0.39353	0.0430974	21:26933158:T:G	ENSG00000154736_ADAMTS5.3168.8.2_sun_pQTL	ENSG00000154736_ADAMTS5.3168.8.2_COVID_A1_h	rs2830586	-0.198918	0.330533	-0.84675	0.448915	0.547301	Not assessed	Not assessed
5813	2.63395e-10	0.618555	1.44107e-10	0.338377	0.0430684	1:160792994:T:G	ENSG00000122224_LY9.3324.51.1_sun_pQTL	ENSG00000122224_LY9.3324.51.1_COVID_A1_h	rs12128261	0.104101	0.870776	-1.60259	1.81079	0.90484	Not assessed	Not assessed
7329	0.00189957	0.580122	0.00122377	0.373692	0.0430628	14:50921416:C:T	ENSG00000100504_PYGL.11441.11.3_sun_pQTL	ENSG00000100504_PYGL.11441.11.3_COVID_B1_h	rs144359893	0.0314277	0.268811	-0.495432	0.558287	0.906928	Not assessed	Not assessed
7217	0.00261915	0.63381	0.00131924	0.3192	0.043052	14:50921416:C:T	ENSG00000100504_PYGL.11441.11.3_sun_pQTL	ENSG00000100504_PYGL.11441.11.3_COVID_A2_h	rs144359893	0.0812041	0.234587	-0.378577	0.540985	0.729224	Not assessed	Not assessed
6831	0	0.588025	0	0.368932	0.0430426	4:15713139:G:A	ENSG00000109743_BST1.4535.50.2_sun_pQTL	ENSG00000109743_BST1.4535.50.2_COVID_A1_h	rs73224660	0.0305678	0.150677	-0.264753	0.325888	0.839237	Not assessed	Not assessed
6062	0.000504151	0.60533	0.00029224	0.350847	0.0430275	22:23907386:G:A	ENSG00000133433_GSTT2B.11273.176.3_sun_pQTL	ENSG00000133433_GSTT2B.11273.176.3_COVID_A1_h	rs5760104	-0.526004	1.32525	-3.12344	2.07143	0.691434	Not assessed	Not assessed
7221	9.0777e-49	0.669883	3.89098e-49	0.287089	0.0430273	1:103524734:C:T	ENSG00000237763_AMY1A.7918.114.3_sun_pQTL	ENSG00000237763_AMY1A.7918.114.3_COVID_A2_h	rs7538379	-0.084235	0.0720771	-0.225504	0.0570335	0.242533	Not assessed	Not assessed
7495	0.0357035	0.471758	0.0316297	0.417886	0.0430227	9:77296684:C:T	ENSG00000187210_GCNT1.7016.12.3_sun_pQTL	ENSG00000187210_GCNT1.7016.12.3_COVID_A1_h	rs7025340	1.40187	1.34542	-1.23511	4.03885	0.297432	Not assessed	Not assessed
6307	0.4489	0.213715	0.199453	0.094914	0.0430179	1:92473656:C:G	ENSG00000137948_BRDT.12748.6.3_sun_pQTL	ENSG00000137948_BRDT.12748.6.3_COVID_B2_h	rs6661028	0.769103	0.243631	0.291595	1.24661	0.00159493	Not assessed	Not assessed
5896	6.20696e-141	0.60917	3.54438e-141	0.347813	0.0430168	19:10289434:G:C	ENSG00000105376_ICAM5.5124.62.3_sun_pQTL	ENSG00000105376_ICAM5.5124.62.3_COVID_A1_h	rs281439	-0.0982079	0.263476	-0.614611	0.418195	0.709342	Not assessed	Not assessed
7597	2.16421e-256	0.551228	1.59325e-256	0.405761	0.0430108	19:54244896:C:G	ENSG00000244482_LILRA6.7059.14.3_sun_pQTL	ENSG00000244482_LILRA6.7059.14.3_COVID_A1_h	rs35361042	0.0321449	0.18335	-0.327213	0.391503	0.860828	Not assessed	Not assessed
5414	9.76873e-260	0.64147	4.80607e-260	0.31555	0.0429798	2:102418584:A:G	ENSG00000115604_IL18R1.3446.7.2_sun_pQTL	ENSG00000115604_IL18R1.3446.7.2_COVID_A1_h	rs1420106	-0.0176114	0.19705	-0.403823	0.3686	0.928784	Not assessed	Not assessed
6252	1.56082e-17	0.677654	6.43566e-18	0.27937	0.0429757	1:63653675:T:C	ENSG00000079739_PGM1.9173.21.3_sun_pQTL	ENSG00000079739_PGM1.9173.21.3_COVID_A2_h	rs2269233	0.186543	0.111745	-0.0324729	0.405558	0.095045	Not assessed	Not assessed
6697	1.09095e-13	0.594013	6.66788e-14	0.363016	0.0429708	10:42857446:T:C	ENSG00000165731_RET.3220.40.2_sun_pQTL	ENSG00000165731_RET.3220.40.2_COVID_A1_h	rs2795507	-0.348862	0.667594	-1.65732	0.959598	0.601276	Not assessed	Not assessed
5746	0	0.591894	0	0.365168	0.0429386	3:158738372:G:A	ENSG00000118849_RARRES1.8398.277.3_sun_pQTL	ENSG00000118849_RARRES1.8398.277.3_COVID_A1_h	rs61387735	0.0305194	0.153537	-0.270407	0.331446	0.842438	Not assessed	Not assessed
4677	1.80335e-16	0.656237	8.26931e-17	0.300876	0.0428867	17:44352876:C:T	ENSG00000030582_GRN.4992.49.1_sun_pQTL	ENSG00000030582_GRN.4992.49.1_COVID_A1_h	rs5848	-0.140326	0.608397	-1.33276	1.05211	0.817588	Not assessed	Not assessed
5439	1.26492e-05	0.600733	7.50468e-06	0.356368	0.0428785	5:133199354:G:A	ENSG00000053108_FSTL4.9350.3.3_sun_pQTL	ENSG00000053108_FSTL4.9350.3.3_COVID_A1_h	rs3749817	-0.488205	0.864043	-2.1817	1.20529	0.572058	Not assessed	Not assessed
6638	0.00100354	0.711477	0.000344666	0.244313	0.0428619	1:204179521:G:A	ENSG00000143839_REN.3396.54.2_sun_pQTL	ENSG00000143839_REN.3396.54.2_COVID_C1_h	rs193280350	0.0622262	0.102085	-0.137857	0.26231	0.542159	Not assessed	Not assessed
6097	1.44989e-20	0.678228	5.96357e-21	0.278921	0.0428508	11:59864062:C:T	ENSG00000134827_TCN1.11232.46.3_sun_pQTL	ENSG00000134827_TCN1.11232.46.3_COVID_D1_h	rs34528912	-0.123716	0.108214	-0.335811	0.0883782	0.25293	Not assessed	Not assessed
5297	2.10513e-44	0.413606	2.76676e-44	0.543557	0.0428374	3:46463776:G:C	ENSG00000012223_LTF.2780.35.2_sun_pQTL	ENSG00000012223_LTF.2780.35.2_COVID_A1_h	rs6441996	0.564823	0.3921	-0.203679	1.33333	0.149724	Not assessed	Not assessed
7782	2.15265e-19	0.640582	1.06414e-19	0.316623	0.0427949	7:23273552:T:C	ENSG00000136235_GPNMB.8606.39.3_sun_pQTL	ENSG00000136235_GPNMB.8606.39.3_COVID_A2_h	rs2268748	0.144525	0.140443	-0.130737	0.419788	0.303447	Not assessed	Not assessed
5706	0.254853	0.374329	0.1329	0.195161	0.0427574	13:114061632:G:A	ENSG00000186009_ATP4B.9994.217.3_sun_pQTL	ENSG00000186009_ATP4B.9994.217.3_COVID_A2_h	rs113784824	-0.627713	0.284215	-1.18476	-0.070661	0.0272037	Not assessed	Not assessed
6250	8.62512e-34	0.711529	2.97945e-34	0.245747	0.0427238	12:7102090:G:C	ENSG00000139178_C1RL.9348.1.3_sun_pQTL	ENSG00000139178_C1RL.9348.1.3_COVID_A2_h	rs191448232	0.0183601	0.0761959	-0.130981	0.167701	0.809586	Not assessed	Not assessed
4372	0.0491902	0.640303	0.0191113	0.248727	0.0426688	1:154123621:C:T	ENSG00000143549_TPM3.12372.50.3_sun_pQTL	ENSG00000143549_TPM3.12372.50.3_COVID_A1_h	rs72696208	-0.0806014	1.16831	-2.37045	2.20925	0.944998	Not assessed	Not assessed
6132	6.27865e-74	0.792841	1.30321e-74	0.164521	0.0426384	14:74020818:G:A	ENSG00000187097_ENTPD5.4437.56.3_sun_pQTL	ENSG00000187097_ENTPD5.4437.56.3_COVID_C2_h	rs57731447	-0.0435219	0.0267191	-0.0958903	0.00884649	0.10334	Not assessed	Not assessed
7050	1.24608e-11	0.542026	9.54947e-12	0.415345	0.042629	13:37582401:C:T	ENSG00000133110_POSTN.6650.20.3_sun_pQTL	ENSG00000133110_POSTN.6650.20.3_COVID_A2_h	rs117103342	0.0452964	0.163635	-0.275423	0.366015	0.781924	Not assessed	Not assessed
5755	0.00103682	0.704743	0.000369678	0.251234	0.0426158	4:73437153:T:C	ENSG00000081051_AFP.5792.8.2_sun_pQTL	ENSG00000081051_AFP.5792.8.2_COVID_B2_h	rs16849384	-0.428029	0.160639	-0.742876	-0.113183	0.00770932	Not assessed	Not assessed
7055	1.78289e-25	0.582249	1.14884e-25	0.375142	0.0426086	4:76079288:A:G	ENSG00000156219_ART3.7970.315.3_sun_pQTL	ENSG00000156219_ART3.7970.315.3_COVID_A1_h	rs4859610	0.334665	0.488544	-0.622862	1.29219	0.493327	Not assessed	Not assessed
7056	4.35137e-28	0.582235	2.80408e-28	0.375158	0.0426075	4:76079288:A:G	ENSG00000156219_ART3.10970.3.3_sun_pQTL	ENSG00000156219_ART3.10970.3.3_COVID_A1_h	rs4859610	0.321805	0.469769	-0.598926	1.24254	0.493327	Not assessed	Not assessed
7566	0.0135927	0.498319	0.0118306	0.433675	0.0425835	10:17347855:C:G	ENSG00000148488_ST8SIA6.6930.95.3_sun_pQTL	ENSG00000148488_ST8SIA6.6930.95.3_COVID_A1_h	rs56062372	1.05739	1.10534	-1.10904	3.22382	0.338759	Not assessed	Not assessed
7052	1.67973e-08	0.542038	1.28743e-08	0.415401	0.042561	13:37582401:C:T	ENSG00000133110_POSTN.6645.53.3_sun_pQTL	ENSG00000133110_POSTN.6645.53.3_COVID_A2_h	rs117103342	0.0507342	0.18328	-0.308487	0.409956	0.781924	Not assessed	Not assessed
5684	0.00102263	0.694457	0.000385247	0.261574	0.0425606	4:73360328:C:T	ENSG00000081051_AFP.5792.8.2_sun_pQTL	ENSG00000081051_AFP.5792.8.2_COVID_A2_h	rs10008400	-0.571176	0.260301	-1.08136	-0.0609968	0.0282141	Not assessed	Not assessed
6119	0.0971108	0.497411	0.0592892	0.303642	0.0425469	1:161940930:T:C	ENSG00000118217_ATF6.11277.23.3_sun_pQTL	ENSG00000118217_ATF6.11277.23.3_COVID_A1_h	rs4233381	0.548681	1.35032	-2.0979	3.19527	0.684498	Not assessed	Not assessed
8151	0.011848	0.612132	0.00633288	0.327148	0.0425398	6:150055871:T:A	ENSG00000131019_ULBP3.2747.3.2_sun_pQTL	ENSG00000131019_ULBP3.2747.3.2_COVID_B1_h	rs4317422	0.612579	0.326829	-0.0279947	1.25315	0.0608879	Not assessed	Not assessed
5892	3.55138e-123	0.614636	1.9811e-123	0.342825	0.042539	1:183186170:G:A	ENSG00000058085_LAMC2.9580.5.3_sun_pQTL	ENSG00000058085_LAMC2.9580.5.3_COVID_A1_h	rs2276543	0.144703	0.265979	-0.376606	0.666013	0.586413	Not assessed	Not assessed
3754	0.276803	0.418603	0.104335	0.15774	0.042519	16:67913258:C:T	ENSG00000167261_DPEP2.8327.26.3_sun_pQTL	ENSG00000167261_DPEP2.8327.26.3_COVID_A1_h	rs13329995	-1.76792	1.24352	-4.20517	0.669333	0.155111	Not assessed	Not assessed
7592	0.0298753	0.532554	0.020988	0.374088	0.0424954	6:148747642:C:T	ENSG00000111962_UST.8364.74.3_sun_pQTL	ENSG00000111962_UST.8364.74.3_COVID_B1_h	rs45490997	0.395483	0.336307	-0.263668	1.05463	0.239612	Not assessed	Not assessed
7330	0.137352	0.428825	0.0949496	0.296399	0.0424752	4:3482087:A:G	ENSG00000163956_LRPAP1.8829.4.3_sun_pQTL	ENSG00000163956_LRPAP1.8829.4.3_COVID_A1_h	rs73793939	1.86053	1.25139	-0.592141	4.31321	0.137074	Not assessed	Not assessed
5044	4.8234e-162	0.605177	2.80875e-162	0.352362	0.0424618	3:52786995:A:G	ENSG00000055957_ITIH1.7955.195.3_sun_pQTL	ENSG00000055957_ITIH1.7955.195.3_COVID_D1_h	rs1042779	0.0769256	0.0419124	-0.00522127	0.159072	0.0664482	Not assessed	Not assessed
7509	0.273211	0.32555	0.163733	0.195057	0.0424496	3:186672838:C:T	ENSG00000157005_SST.5957.30.3_sun_pQTL	ENSG00000157005_SST.5957.30.3_COVID_B1_h	rs9898	-0.799253	0.364678	-1.51401	-0.0844973	0.0284035	Not assessed	Not assessed
6529	0.029075	0.566849	0.017646	0.343986	0.0424446	6:38707877:G:C	ENSG00000124767_GLO1.9883.29.3_sun_pQTL	ENSG00000124767_GLO1.9883.29.3_COVID_A1_h	rs1781733	-1.40343	1.52392	-4.39025	1.5834	0.357085	Not assessed	Not assessed
5614	4.46965e-06	0.621821	2.41362e-06	0.335742	0.0424298	19:43103053:T:C	ENSG00000204941_PSG5.9314.9.3_sun_pQTL	ENSG00000204941_PSG5.9314.9.3_COVID_A1_h	rs10414048	0.270793	1.00172	-1.69254	2.23412	0.786907	Not assessed	Not assessed
8143	1.39866e-21	0.45607	1.53812e-21	0.501501	0.0424289	4:56823294:C:T	ENSG00000128040_SPINK2.13405.61.3_sun_pQTL	ENSG00000128040_SPINK2.13405.61.3_COVID_A2_h	rs11941335	-0.105682	0.0802141	-0.262899	0.0515344	0.18767	Not assessed	Not assessed
7686	4.83658e-12	0.536359	3.79866e-12	0.421214	0.0424271	5:39327786:G:T	ENSG00000113600_C9.3060.43.2_sun_pQTL	ENSG00000113600_C9.3060.43.2_COVID_B1_h	rs62358361	-0.0376756	0.193352	-0.416639	0.341288	0.845507	Not assessed	Not assessed
6891	1.2561e-56	0.654086	5.82945e-57	0.303513	0.0424004	1:107135646:G:C	ENSG00000162631_NTNG1.5637.81.3_sun_pQTL	ENSG00000162631_NTNG1.5637.81.3_COVID_B1_h	rs115668827	-0.0962625	0.110572	-0.312979	0.120455	0.38398	Not assessed	Not assessed
6324	2.46607e-39	0.57594	1.63439e-39	0.381662	0.0423989	2:224015781:T:C	ENSG00000135919_SERPINE2.3217.74.2_sun_pQTL	ENSG00000135919_SERPINE2.3217.74.2_COVID_A1_h	rs68066031	-0.248932	0.419737	-1.0716	0.573738	0.553136	Not assessed	Not assessed
5939	0.0764374	0.0295044	0.614543	0.237168	0.0423469	22:19588430:A:G	ENSG00000244486_SCARF2.5130.67.3_sun_pQTL	ENSG00000244486_SCARF2.5130.67.3_COVID_B2_h	rs737857	-2.63927	0.545957	-3.70933	-1.56922	1.33672e-06	Not assessed	Not assessed
6167	3.49119e-60	0.708164	1.23024e-60	0.249504	0.0423323	3:53858803:T:C	ENSG00000056736_IL17RB.5084.154.3_sun_pQTL	ENSG00000056736_IL17RB.5084.154.3_COVID_B2_h	rs2232346	-0.0667203	0.0556059	-0.175706	0.0422652	0.230187	Not assessed	Not assessed
7311	1.13569e-50	0.553354	8.29928e-51	0.404333	0.0423135	1:180194255:A:G	ENSG00000116260_QSOX1.6217.23.3_sun_pQTL	ENSG00000116260_QSOX1.6217.23.3_COVID_A2_h	rs12371	0.109615	0.0694825	-0.0265677	0.245799	0.114658	Not assessed	Not assessed
5789	0.279634	0.073017	0.479816	0.125246	0.0422871	19:35739969:A:G	ENSG00000161298_ZNF382.14616.16.3_sun_pQTL	ENSG00000161298_ZNF382.14616.16.3_COVID_C1_h	rs144495330	-3.03201	0.645953	-4.29805	-1.76596	2.68108e-06	Not assessed	Not assessed
7817	2.32971e-19	0.694117	8.84975e-20	0.263628	0.0422554	7:23273552:T:C	ENSG00000136235_GPNMB.8606.39.3_sun_pQTL	ENSG00000136235_GPNMB.8606.39.3_COVID_B2_h	rs2268748	0.112777	0.0894409	-0.0625243	0.288078	0.207342	Not assessed	Not assessed
6554	0.0838101	0.442017	0.06885	0.363074	0.0422486	1:236133687:A:G	ENSG00000116962_NID1.3213.65.2_sun_pQTL	ENSG00000116962_NID1.3213.65.2_COVID_A1_h	rs77610102	0.0795758	1.13718	-2.14925	2.3084	0.944212	Not assessed	Not assessed
7175	1.40061e-11	0.60956	8.00178e-12	0.348205	0.0422345	13:37582401:C:T	ENSG00000133110_POSTN.6650.20.3_sun_pQTL	ENSG00000133110_POSTN.6650.20.3_COVID_B2_h	rs117103342	0.0459586	0.118851	-0.186984	0.278902	0.698984	Not assessed	Not assessed
3885	0.0308669	0.799504	0.0047375	0.122667	0.0422245	1:150601831:A:C	ENSG00000143384_MCL1.10358.33.3_sun_pQTL	ENSG00000143384_MCL1.10358.33.3_COVID_C2_h	rs72700851	-0.12643	0.110665	-0.343329	0.0904683	0.253261	Not assessed	Not assessed
6245	1.73263e-19	0.675147	7.25454e-20	0.282643	0.0422102	1:160705479:G:C	ENSG00000117091_CD48.3292.75.1_sun_pQTL	ENSG00000117091_CD48.3292.75.1_COVID_A2_h	rs12124234	-0.233266	0.149534	-0.526347	0.0598147	0.11877	Not assessed	Not assessed
4801	0.0204822	0.739815	0.00532189	0.192184	0.042197	8:85533122:C:G	ENSG00000133742_CA1.4969.2.1_sun_pQTL	ENSG00000133742_CA1.4969.2.1_COVID_D1_h	rs147156208	-0.0298517	0.16172	-0.346816	0.287113	0.853551	Not assessed	Not assessed
5299	0.000388264	0.675601	0.000161891	0.281656	0.0421929	1:12193005:G:A	ENSG00000028137_TNFRSF1B.3152.57.1_sun_pQTL	ENSG00000028137_TNFRSF1B.3152.57.1_COVID_B1_h	rs5746026	-0.308286	0.304534	-0.905163	0.28859	0.311385	Not assessed	Not assessed
7177	1.88824e-08	0.609565	1.07894e-08	0.348264	0.0421706	13:37582401:C:T	ENSG00000133110_POSTN.6645.53.3_sun_pQTL	ENSG00000133110_POSTN.6645.53.3_COVID_B2_h	rs117103342	0.0514759	0.133119	-0.209432	0.312384	0.698984	Not assessed	Not assessed
6527	6.96161e-05	0.574885	4.6367e-05	0.382853	0.0421457	10:119670121:T:C	ENSG00000151929_BAG3.10078.5.3_sun_pQTL	ENSG00000151929_BAG3.10078.5.3_COVID_A1_h	rs2234962	0.579827	0.95178	-1.28563	2.44528	0.54239	Not assessed	Not assessed
6462	0.0230679	0.57305	0.0139997	0.347737	0.0421447	5:39360380:C:T	ENSG00000113600_C9.3060.43.2_sun_pQTL	ENSG00000113600_C9.3060.43.2_COVID_A1_h	rs700222	0.973851	1.36241	-1.69642	3.64412	0.474731	Not assessed	Not assessed
5914	1.92438e-09	0.670926	8.23129e-10	0.286938	0.0421361	21:33343393:G:C	ENSG00000142166_IFNAR1.9183.7.3_sun_pQTL	ENSG00000142166_IFNAR1.9183.7.3_COVID_C1_h	rs2257167	0.139886	0.0753124	-0.00772349	0.287496	0.0632527	Not assessed	Not assessed
6486	0.000264824	0.552157	0.000194384	0.405249	0.0421353	8:119067654:G:A	ENSG00000184374_COLEC10.6558.5.3_sun_pQTL	ENSG00000184374_COLEC10.6558.5.3_COVID_A1_h	rs1385496	0.725481	0.958858	-1.15384	2.60481	0.449283	Not assessed	Not assessed
6658	0.364635	0.324106	0.142506	0.126624	0.0421293	21:28054543:C:T	ENSG00000156239_N6AMT1.11096.57.3_sun_pQTL	ENSG00000156239_N6AMT1.11096.57.3_COVID_A2_h	rs4629243	0.803973	0.379166	0.0608203	1.54712	0.0339749	Not assessed	Not assessed
7455	2.28891e-87	0.549795	1.69938e-87	0.408147	0.0420586	6:169224805:A:G	ENSG00000186340_THBS2.3339.33.1_sun_pQTL	ENSG00000186340_THBS2.3339.33.1_COVID_A1_h	rs73043857	-0.00774889	0.292961	-0.581943	0.566445	0.978898	Not assessed	Not assessed
7573	5.73294e-12	0.688882	2.23955e-12	0.269067	0.042051	5:39327786:G:T	ENSG00000113600_C9.3060.43.2_sun_pQTL	ENSG00000113600_C9.3060.43.2_COVID_D1_h	rs62358361	-0.0363085	0.116987	-0.265598	0.192981	0.756284	Not assessed	Not assessed
7360	4.22827e-138	0.586247	2.68125e-138	0.371711	0.0420424	4:991939:A:G	ENSG00000127415_IDUA.3169.70.2_sun_pQTL	ENSG00000127415_IDUA.3169.70.2_COVID_B1_h	rs3822020	0.109806	0.0681447	-0.0237553	0.243367	0.107101	Not assessed	Not assessed
6445	0.153024	0.440147	0.094119	0.270675	0.0420353	2:178890891:TTTG:T	ENSG00000155657_TTN.11352.42.3_sun_pQTL	ENSG00000155657_TTN.11352.42.3_COVID_A1_h	rs143911349	0.806372	2.61065	-4.31041	5.92316	0.757415	Not assessed	Not assessed
5787	3.48953e-12	0.671499	1.48893e-12	0.286476	0.0420259	3:46450495:C:T	ENSG00000012223_LTF.2795.23.3_sun_pQTL	ENSG00000012223_LTF.2795.23.3_COVID_D1_h	rs61740470	-0.0280257	0.127175	-0.277283	0.221232	0.825582	Not assessed	Not assessed
7445	7.30309e-07	0.547188	5.48327e-07	0.410795	0.0420165	6:152999285:AAGG:A	ENSG00000112031_MTRF1L.11134.30.3_sun_pQTL	ENSG00000112031_MTRF1L.11134.30.3_COVID_A1_h	rs68115660	-1.917	1.19957	-4.26811	0.434113	0.110027	Not assessed	Not assessed
7386	9.77921e-09	0.614977	5.4554e-09	0.343027	0.0419962	11:34377638:G:T	ENSG00000121691_CAT.3488.64.2_sun_pQTL	ENSG00000121691_CAT.3488.64.2_COVID_B1_h	rs2745924	-0.348765	0.213543	-0.767301	0.0697716	0.102421	Not assessed	Not assessed
7153	0.195905	0.441154	0.0987151	0.222253	0.0419736	21:44045798:C:T	ENSG00000184900_SUMO3.9169.14.3_sun_pQTL	ENSG00000184900_SUMO3.9169.14.3_COVID_A2_h	rs7275722	0.640393	0.280147	0.0913142	1.18947	0.0222593	Not assessed	Not assessed
5224	1.84534e-28	0.645141	8.95165e-29	0.312912	0.0419468	9:34356361:C:T	ENSG00000164976_KIAA1161.8068.43.3_sun_pQTL	ENSG00000164976_KIAA1161.8068.43.3_COVID_A1_h	rs10972076	0.221733	0.490234	-0.739108	1.18257	0.651053	Not assessed	Not assessed
5222	2.5596e-06	0.608171	1.47292e-06	0.349929	0.0418957	18:466810:T:G	ENSG00000158270_COLEC12.5457.5.2_sun_pQTL	ENSG00000158270_COLEC12.5457.5.2_COVID_A1_h	rs2846667	0.148673	0.861782	-1.54039	1.83774	0.86303	Not assessed	Not assessed
5376	1.64684e-22	0.652628	7.71077e-23	0.305529	0.0418429	17:58281068:C:T	ENSG00000005381_MPO.2580.83.2_sun_pQTL	ENSG00000005381_MPO.2580.83.2_COVID_A2_h	rs34097845	-0.163171	0.160882	-0.478494	0.152152	0.310474	Not assessed	Not assessed
6012	0.000493751	0.602962	0.000290259	0.354419	0.0418355	6:132457399:T:C	ENSG00000079950_STX7.8274.64.3_sun_pQTL	ENSG00000079950_STX7.8274.64.3_COVID_A1_h	rs6569798	0.636166	0.964503	-1.25422	2.52656	0.509524	Not assessed	Not assessed
6641	0.137051	0.0630402	0.519273	0.23881	0.0418254	1:183108761:T:C	ENSG00000135829_DHX9.10527.22.3_sun_pQTL	ENSG00000135829_DHX9.10527.22.3_COVID_C1_h	rs10752898	1.51928	0.363279	0.807265	2.23129	2.88795e-05	Not assessed	Not assessed
7265	2.41794e-93	0.529155	1.96068e-93	0.429044	0.0418016	1:169594713:T:G	ENSG00000174175_SELP.4154.57.2_sun_pQTL	ENSG00000174175_SELP.4154.57.2_COVID_A1_h	rs6136	0.101252	0.301016	-0.488728	0.691232	0.736593	Not assessed	Not assessed
8691	4.3161e-17	0.524728	3.56584e-17	0.433474	0.0417973	10:4967547:T:G	ENSG00000187134_AKR1C1.12618.50.3_sun_pQTL	ENSG00000187134_AKR1C1.12618.50.3_COVID_A1_h	rs145648894	-0.0893349	0.636364	-1.33658	1.15791	0.888357	Not assessed	Not assessed
7552	0.0385281	0.517753	0.0278404	0.374087	0.0417913	18:10479438:A:G	ENSG00000154856_APCDD1.6599.5.3_sun_pQTL	ENSG00000154856_APCDD1.6599.5.3_COVID_A1_h	rs525355	1.68198	1.26413	-0.79567	4.15964	0.183339	Not assessed	Not assessed
4478	3.45617e-06	0.602875	2.03733e-06	0.355339	0.0417803	2:62336639:A:G	ENSG00000170340_B3GNT2.7980.72.3_sun_pQTL	ENSG00000170340_B3GNT2.7980.72.3_COVID_A1_h	rs4073090	-0.692248	0.912224	-2.48017	1.09568	0.447938	Not assessed	Not assessed
6385	3.03829e-43	0.599546	1.81786e-43	0.358676	0.0417779	17:74473827:G:A	ENSG00000167851_CD300A.5630.48.3_sun_pQTL	ENSG00000167851_CD300A.5630.48.3_COVID_A1_h	rs2272111	0.0624761	0.427273	-0.774963	0.899915	0.883747	Not assessed	Not assessed
5045	4.66882e-18	0.652474	2.18816e-18	0.305757	0.0417683	1:43307362:A:G	ENSG00000066056_TIE1.2844.53.2_sun_pQTL	ENSG00000066056_TIE1.2844.53.2_COVID_A1_h	rs2275180	-0.0995311	0.572853	-1.2223	1.02324	0.862065	Not assessed	Not assessed
6848	5.58629e-12	0.564199	3.90262e-12	0.394111	0.0416907	7:23251368:G:A	ENSG00000136235_GPNMB.8240.207.3_sun_pQTL	ENSG00000136235_GPNMB.8240.207.3_COVID_A1_h	rs10262243	0.751284	0.741056	-0.701159	2.20373	0.310677	Not assessed	Not assessed
6235	6.36613e-27	0.58559	4.05251e-27	0.372729	0.0416815	5:35857481:C:CAGAAG	ENSG00000168685_IL7R.5089.11.3_sun_pQTL	ENSG00000168685_IL7R.5089.11.3_COVID_A1_h	rs10624573	-0.176372	0.647579	-1.4456	1.09286	0.785348	Not assessed	Not assessed
6978	0.116618	0.609795	0.0372368	0.19467	0.0416812	1:161765607:T:A	ENSG00000118217_ATF6.11277.23.3_sun_pQTL	ENSG00000118217_ATF6.11277.23.3_COVID_C1_h	rs6427628	-0.27227	0.140623	-0.547886	0.00334671	0.0528475	Not assessed	Not assessed
5476	1.57216e-05	0.690145	6.10959e-06	0.268156	0.0416768	9:34593088:G:A	ENSG00000122756_CNTFR.14101.2.3_sun_pQTL	ENSG00000122756_CNTFR.14101.2.3_COVID_A2_h	rs10972159	-0.130297	0.144054	-0.412637	0.152043	0.365728	Not assessed	Not assessed
4439	3.31141e-52	0.774582	7.85708e-53	0.183746	0.0416719	1:196998224:G:A	ENSG00000134389_CFHR5.3666.17.4_sun_pQTL	ENSG00000134389_CFHR5.3666.17.4_COVID_D1_h	rs35662416	-0.058167	0.0807282	-0.216391	0.100057	0.4712	Not assessed	Not assessed
6593	0.256578	0.240505	0.238115	0.223157	0.0416442	19:9435630:A:G	ENSG00000130811_EIF3G.11454.87.3_sun_pQTL	ENSG00000130811_EIF3G.11454.87.3_COVID_B1_h	rs1433061	-3.20469	0.832989	-4.83731	-1.57206	0.000119468	Not assessed	Not assessed
4662	0.230918	0.423189	0.107425	0.19683	0.0416387	1:31510040:A:G	ENSG00000142910_TINAGL1.11192.168.3_sun_pQTL	ENSG00000142910_TINAGL1.11192.168.3_COVID_A1_h	rs10158101	-1.41644	1.33533	-4.03364	1.20076	0.288808	Not assessed	Not assessed
8274	0.207906	0.399903	0.119933	0.230647	0.0416099	2:106259505:C:T	ENSG00000115652_UXS1.8258.22.3_sun_pQTL	ENSG00000115652_UXS1.8258.22.3_COVID_D1_h	rs55652702	-0.791218	0.270524	-1.32144	-0.261001	0.00344721	Not assessed	Not assessed
6697	1.03758e-42	0.675727	4.341e-43	0.282667	0.0416059	20:58997654:A:G	ENSG00000101160_CTSZ.4971.1.1_sun_pQTL	ENSG00000101160_CTSZ.4971.1.1_COVID_C2_h	rs199825459	-0.0405519	0.0427826	-0.124404	0.0433005	0.343201	Not assessed	Not assessed
8129	9.83115e-09	0.627364	5.18834e-09	0.331047	0.0415885	17:81231621:G:A	ENSG00000167302_ENTHD2.7947.19.3_sun_pQTL	ENSG00000167302_ENTHD2.7947.19.3_COVID_B2_h	rs61745945	-0.101206	0.124019	-0.344279	0.141868	0.414473	Not assessed	Not assessed
5298	2.16327e-12	0.413963	2.84539e-12	0.544452	0.0415854	3:46450495:C:T	ENSG00000012223_LTF.2795.23.3_sun_pQTL	ENSG00000012223_LTF.2795.23.3_COVID_A1_h	rs61740470	0.750134	0.685065	-0.592568	2.09284	0.273524	Not assessed	Not assessed
5386	1.81863e-22	0.719468	6.04136e-23	0.238961	0.0415709	17:58281068:C:T	ENSG00000005381_MPO.2580.83.2_sun_pQTL	ENSG00000005381_MPO.2580.83.2_COVID_D1_h	rs34097845	-0.140345	0.134327	-0.403621	0.122931	0.296114	Not assessed	Not assessed
7505	0.0296022	0.509719	0.0230078	0.396127	0.0415438	2:37365901:G:A	ENSG00000115828_QPCT.7849.3.3_sun_pQTL	ENSG00000115828_QPCT.7849.3.3_COVID_A1_h	rs72792854	0.476288	1.43445	-2.33518	3.28775	0.739862	Not assessed	Not assessed
6890	0.027459	0.560363	0.0173161	0.353333	0.0415284	12:104298293:A:C	ENSG00000198431_TXNRD1.13967.14.3_sun_pQTL	ENSG00000198431_TXNRD1.13967.14.3_COVID_A1_h	rs34621285	-0.847019	1.12765	-3.05716	1.36312	0.452568	Not assessed	Not assessed
5981	6.74729e-05	0.697615	2.52258e-05	0.260773	0.0415192	1:42153468:A:G	ENSG00000044012_GUCA2B.6223.5.3_sun_pQTL	ENSG00000044012_GUCA2B.6223.5.3_COVID_D1_h	rs1047047	-0.356361	0.180794	-0.710711	-0.00201177	0.0487134	Not assessed	Not assessed
7217	6.24077e-24	0.688482	2.44823e-24	0.270047	0.0414706	4:176729712:C:T	ENSG00000150630_VEGFC.3132.1.1_sun_pQTL	ENSG00000150630_VEGFC.3132.1.1_COVID_B2_h	rs41278571	-0.02959	0.0809256	-0.188201	0.129021	0.71463	Not assessed	Not assessed
3335	0.00134082	0.000317977	0.773482	0.183391	0.0414685	12:112958205:T:C	ENSG00000089248_ERP29.13728.19.3_sun_pQTL	ENSG00000089248_ERP29.13728.19.3_COVID_B2_h	rs10744789	-2.59119	0.472956	-3.51817	-1.66422	4.28405e-08	Not assessed	Not assessed
6684	3.5755e-11	0.597919	2.15681e-11	0.360634	0.041447	15:79921949:C:T	ENSG00000136371_MTHFS.14107.1.3_sun_pQTL	ENSG00000136371_MTHFS.14107.1.3_COVID_A1_h	rs57141546	0.446896	0.735118	-0.99391	1.8877	0.543238	Not assessed	Not assessed
5070	0.000731903	0.497336	0.000676752	0.459818	0.0414369	4:73091019:G:A	ENSG00000081051_AFP.5792.8.2_sun_pQTL	ENSG00000081051_AFP.5792.8.2_COVID_A1_h	rs6855349	-1.37936	1.07526	-3.48682	0.728108	0.199557	Not assessed	Not assessed
7154	4.00563e-24	0.56395	2.80317e-24	0.394616	0.0414337	2:233757337:A:G	ENSG00000167165_UGT1A6.7891.45.3_sun_pQTL	ENSG00000167165_UGT1A6.7891.45.3_COVID_A1_h	rs1976391	-0.0694862	0.588134	-1.22221	1.08324	0.905951	Not assessed	Not assessed
6455	3.7148e-62	0.636655	1.87866e-62	0.321929	0.0414164	18:31633396:C:CT	ENSG00000118276_B4GALT6.10832.24.3_sun_pQTL	ENSG00000118276_B4GALT6.10832.24.3_COVID_B1_h	rs201022770	0.095415	0.11712	-0.134135	0.324965	0.415255	Not assessed	Not assessed
5743	5.28207e-13	0.64743	2.53901e-13	0.311168	0.0414013	15:65400920:C:T	ENSG00000103742_IGDCC4.9793.145.3_sun_pQTL	ENSG00000103742_IGDCC4.9793.145.3_COVID_A2_h	rs35223184	0.0267477	0.163097	-0.292917	0.346413	0.869733	Not assessed	Not assessed
8142	0.122751	0.493048	0.0683488	0.274491	0.0413611	19:2109989:A:T	ENSG00000133275_CSNK1G2.12653.13.3_sun_pQTL	ENSG00000133275_CSNK1G2.12653.13.3_COVID_B1_h	rs77265501	1.01209	0.490315	0.0510881	1.97309	0.0390027	Not assessed	Not assessed
7484	6.57138e-07	0.698532	2.4474e-07	0.260115	0.0413517	14:79036745:A:T	ENSG00000021645_NRXN3.5111.15.3_sun_pQTL	ENSG00000021645_NRXN3.5111.15.3_COVID_C1_h	rs2202168	-0.252395	0.0961881	-0.44092	-0.0638693	0.0086912	Not assessed	Not assessed
7067	9.55418e-63	0.6472	4.5984e-63	0.311454	0.0413462	2:178448955:G:C	ENSG00000079150_FKBP7.9288.7.3_sun_pQTL	ENSG00000079150_FKBP7.9288.7.3_COVID_B1_h	rs13382684	0.136892	0.0897737	-0.0390616	0.312845	0.127296	Not assessed	Not assessed
7080	1.27579e-16	0.582083	8.25454e-17	0.376574	0.0413426	4:76031135:A:G	ENSG00000169248_CXCL11.3038.9.2_sun_pQTL	ENSG00000169248_CXCL11.3038.9.2_COVID_A1_h	rs6846814	-0.813465	0.737907	-2.25974	0.632807	0.27029	Not assessed	Not assessed
9868	4.76011e-63	0.652031	2.23882e-63	0.306628	0.0413404	4:7432729:A:G	ENSG00000178597_PSAPL1.8814.33.3_sun_pQTL	ENSG00000178597_PSAPL1.8814.33.3_COVID_B2_h	rs10023470	-0.0952855	0.0495913	-0.192483	0.00191166	0.0546793	Not assessed	Not assessed
4032	1.11534e-12	0.73907	3.31469e-13	0.219604	0.0413264	11:66570403:C:A	ENSG00000174080_CTSF.9212.22.3_sun_pQTL	ENSG00000174080_CTSF.9212.22.3_COVID_B1_h	rs1791679	0.272116	0.181218	-0.0830641	0.627296	0.133201	Not assessed	Not assessed
6206	2.4984e-11	0.580233	1.62973e-11	0.378452	0.0413151	19:46027131:T:C	ENSG00000008438_PGLYRP1.3329.14.2_sun_pQTL	ENSG00000008438_PGLYRP1.3329.14.2_COVID_A1_h	rs8102493	0.311172	1.01748	-1.68306	2.3054	0.759738	Not assessed	Not assessed
8335	8.1106e-09	0.49813	7.49987e-09	0.46058	0.0412898	17:81231621:G:A	ENSG00000167302_ENTHD2.7947.19.3_sun_pQTL	ENSG00000167302_ENTHD2.7947.19.3_COVID_B1_h	rs61745945	-0.17662	0.221841	-0.611419	0.25818	0.425942	Not assessed	Not assessed
6917	3.31276e-57	0.582214	2.14262e-57	0.376522	0.0412646	14:52016050:C:T	ENSG00000087303_NID2.3633.70.5_sun_pQTL	ENSG00000087303_NID2.3633.70.5_COVID_A1_h	rs1151582	-0.279452	0.368721	-1.00213	0.443229	0.448514	Not assessed	Not assessed
6510	0	0.672068	0	0.286685	0.0412468	11:118206239:C:G	ENSG00000160593_AMICA1.8232.90.3_sun_pQTL	ENSG00000160593_AMICA1.8232.90.3_COVID_A2_h	rs11600544	-0.0715426	0.0376495	-0.145334	0.00224919	0.0574037	Not assessed	Not assessed
7033	0.261585	0.229227	0.249432	0.218536	0.0412205	12:11497254:CT:C	ENSG00000231887_PRH1.10502.15.3_sun_pQTL	ENSG00000231887_PRH1.10502.15.3_COVID_A2_h	rs56080826	1.63397	0.465131	0.72233	2.54561	0.000443202	Not assessed	Not assessed
7293	1.2363e-32	0.574427	8.27449e-33	0.384419	0.0411538	2:36705350:A:T	ENSG00000205221_VIT.6234.74.3_sun_pQTL	ENSG00000205221_VIT.6234.74.3_COVID_A1_h	rs10490666	0.317056	0.444569	-0.554284	1.1884	0.475738	Not assessed	Not assessed
6460	0.155158	0.619391	0.0369274	0.147373	0.0411502	11:72212035:C:CA	ENSG00000184276_DEFB108B.5611.56.3_sun_pQTL	ENSG00000184276_DEFB108B.5611.56.3_COVID_C2_h	rs199606957	0.33649	0.147801	0.0468045	0.626175	0.022808	Not assessed	Not assessed
7493	0.0374137	0.668551	0.0134066	0.239523	0.0411063	6:148747642:C:T	ENSG00000111962_UST.8364.74.3_sun_pQTL	ENSG00000111962_UST.8364.74.3_COVID_B2_h	rs45490997	0.182311	0.213341	-0.23583	0.600451	0.3928	Not assessed	Not assessed
6838	8.58314e-32	0.560354	6.10548e-32	0.398558	0.041088	12:42142262:G:A	ENSG00000151233_GXYLT1.8229.1.3_sun_pQTL	ENSG00000151233_GXYLT1.8229.1.3_COVID_A1_h	rs67420641	-0.176981	0.44948	-1.05795	0.703982	0.693768	Not assessed	Not assessed
6810	0.261244	0.204193	0.27701	0.216474	0.0410789	11:113235806:G:T	ENSG00000166682_TMPRSS5.8002.27.3_sun_pQTL	ENSG00000166682_TMPRSS5.8002.27.3_COVID_B2_h	rs11214546	-3.96067	0.891746	-5.70846	-2.21288	8.93432e-06	Not assessed	Not assessed
5178	7.28258e-33	0.655427	3.37272e-33	0.303501	0.041072	8:86517069:A:C	ENSG00000176623_RMDN1.7096.30.3_sun_pQTL	ENSG00000176623_RMDN1.7096.30.3_COVID_A1_h	rs11781016	-0.0263243	0.484875	-0.976662	0.924014	0.956703	Not assessed	Not assessed
2874	1.25885e-17	0.838895	1.80191e-18	0.120038	0.0410668	10:46241058:A:G	ENSG00000263639_MSMB.10620.21.3_sun_pQTL	ENSG00000263639_MSMB.10620.21.3_COVID_C1_h	rs75735517	0.113748	0.0721918	-0.0277451	0.255242	0.115109	Not assessed	Not assessed
5059	0.196186	0.446764	0.0964367	0.219569	0.0410444	17:50166375:G:A	ENSG00000108821_COL1A1.11140.56.3_sun_pQTL	ENSG00000108821_COL1A1.11140.56.3_COVID_A1_h	rs2412299	0.312028	1.32185	-2.27874	2.9028	0.81339	Not assessed	Not assessed
6938	0.0421016	0.54637	0.0265092	0.34398	0.0410391	5:151735729:T:A	ENSG00000113140_SPARC.3043.49.2_sun_pQTL	ENSG00000113140_SPARC.3043.49.2_COVID_A1_h	rs2915818	-0.666532	1.23169	-3.08059	1.74753	0.588401	Not assessed	Not assessed
6642	9.98706e-44	0.57927	6.5474e-44	0.379721	0.0410091	9:136213967:A:AAC	ENSG00000165661_QSOX2.8397.147.3_sun_pQTL	ENSG00000165661_QSOX2.8397.147.3_COVID_A1_h	rs77836657	0.368645	0.523369	-0.65714	1.39443	0.481203	Not assessed	Not assessed
5037	9.95563e-33	0.647743	4.78469e-33	0.311265	0.0409924	8:98103131:A:G	ENSG00000132541_HRSP12.14636.25.3_sun_pQTL	ENSG00000132541_HRSP12.14636.25.3_COVID_A1_h	rs1462977	0.0259271	0.475554	-0.906141	0.957995	0.956521	Not assessed	Not assessed
6548	9.83382e-06	0.593308	6.06177e-06	0.365686	0.04099	11:36068737:C:T	ENSG00000179431_FJX1.7921.65.3_sun_pQTL	ENSG00000179431_FJX1.7921.65.3_COVID_A1_h	rs12799443	-0.460718	0.902897	-2.23036	1.30893	0.609864	Not assessed	Not assessed
9437	5.78516e-11	0.500025	5.31085e-11	0.458988	0.0409866	11:99333522:T:C	ENSG00000149972_CNTN5.3299.29.2_sun_pQTL	ENSG00000149972_CNTN5.3299.29.2_COVID_A1_h	rs2614546	-0.138304	0.747186	-1.60276	1.32615	0.853151	Not assessed	Not assessed
8313	8.25312e-27	0.639057	4.13264e-27	0.319958	0.0409847	21:45510178:G:A	ENSG00000182871_COL18A1.2201.17.6_sun_pQTL	ENSG00000182871_COL18A1.2201.17.6_COVID_A2_h	rs144147445	0.0722367	0.0802597	-0.0850693	0.229543	0.3681	Not assessed	Not assessed
4154	9.87428e-06	0.706582	3.52821e-06	0.25243	0.0409745	17:62559897:C:A	ENSG00000011028_MRC2.3041.55.2_sun_pQTL	ENSG00000011028_MRC2.3041.55.2_COVID_B1_h	rs146385050	0.363094	0.333103	-0.289776	1.01596	0.275698	Not assessed	Not assessed
7490	2.50198e-159	0.557915	1.79903e-159	0.401124	0.0409608	19:54278849:G:C	ENSG00000131042_LILRB2.5091.28.3_sun_pQTL	ENSG00000131042_LILRB2.5091.28.3_COVID_A1_h	rs7247451	0.0398588	0.33681	-0.620276	0.699994	0.905796	Not assessed	Not assessed
5750	0.255122	0.349745	0.149401	0.204772	0.0409602	14:104759283:G:T	ENSG00000185100_ADSSL1.13998.26.3_sun_pQTL	ENSG00000185100_ADSSL1.13998.26.3_COVID_D1_h	rs10142660	0.879735	0.297932	0.2958	1.46367	0.00314897	Not assessed	Not assessed
6373	2.52594e-63	0.593183	1.55818e-63	0.365876	0.0409408	6:43957870:G:A	ENSG00000112715_VEGFA.2597.8.3_sun_pQTL	ENSG00000112715_VEGFA.2597.8.3_COVID_A2_h	rs6921438	0.121417	0.0891688	-0.0533507	0.296185	0.173308	Not assessed	Not assessed
8175	6.79029e-13	0.624928	3.63112e-13	0.334141	0.040931	19:7668790:A:C	ENSG00000104918_RETN.3046.31.1_sun_pQTL	ENSG00000104918_RETN.3046.31.1_COVID_D1_h	rs34124816	0.160531	0.164011	-0.160925	0.481987	0.327688	Not assessed	Not assessed
7015	0.000500504	0.643611	0.000244785	0.314734	0.0409093	22:23907386:G:A	ENSG00000133433_GSTT2B.11273.176.3_sun_pQTL	ENSG00000133433_GSTT2B.11273.176.3_COVID_B1_h	rs5760104	-0.840877	0.457016	-1.73661	0.0548571	0.0657784	Not assessed	Not assessed
4790	4.09962e-08	0.761682	1.06274e-08	0.197409	0.0409088	8:85438822:G:C	ENSG00000164879_CA3.3799.11.2_sun_pQTL	ENSG00000164879_CA3.3799.11.2_COVID_D1_h	rs2072696	0.21538	0.142729	-0.0643641	0.495125	0.131296	Not assessed	Not assessed
7751	4.81159e-22	0.676905	2.00624e-22	0.282202	0.0408932	10:33195901:G:A	ENSG00000099250_NRP1.3214.3.2_sun_pQTL	ENSG00000099250_NRP1.3214.3.2_COVID_D1_h	rs734186	-0.18038	0.097019	-0.370534	0.00977393	0.0629957	Not assessed	Not assessed
7972	2.19432e-14	0.514381	1.89747e-14	0.444753	0.0408667	5:126825998:C:T	ENSG00000113368_LMNB1.3889.64.2_sun_pQTL	ENSG00000113368_LMNB1.3889.64.2_COVID_B1_h	rs36105360	0.17236	0.176427	-0.173432	0.518151	0.328597	Not assessed	Not assessed
14721	2.96281e-19	0.330457	5.63704e-19	0.628687	0.0408558	6:33158082:G:T	ENSG00000204248_COL11A2.11278.4.3_sun_pQTL	ENSG00000204248_COL11A2.11278.4.3_COVID_A1_h	rs3129205	0.890259	0.571407	-0.229679	2.0102	0.119231	Not assessed	Not assessed
6237	2.95334e-09	0.65929	1.34352e-09	0.299881	0.0408289	19:531115:C:T	ENSG00000197540_GZMM.5704.74.3_sun_pQTL	ENSG00000197540_GZMM.5704.74.3_COVID_B1_h	rs16989724	0.192575	0.288078	-0.372048	0.757198	0.503826	Not assessed	Not assessed
7396	0.434604	0.291746	0.139332	0.0934913	0.0408277	1:168462730:T:C	ENSG00000143184_XCL1.4143.74.2_sun_pQTL	ENSG00000143184_XCL1.4143.74.2_COVID_C1_h	rs35777638	0.399351	0.130549	0.143479	0.655223	0.00222073	Not assessed	Not assessed
7565	2.76274e-38	0.630111	1.44298e-38	0.329067	0.0408215	1:159035061:C:T	ENSG00000163565_IFI16.12893.159.3_sun_pQTL	ENSG00000163565_IFI16.12893.159.3_COVID_A2_h	rs72709516	0.101972	0.0769911	-0.0489274	0.252872	0.185347	Not assessed	Not assessed
2714	0.212413	0.6362	0.027687	0.0828848	0.0408151	20:31448538:T:C	ENSG00000180483_DEFB119.8370.102.3_sun_pQTL	ENSG00000180483_DEFB119.8370.102.3_COVID_D1_h	rs73116233	-0.726717	0.384883	-1.48107	0.0276406	0.059006	Not assessed	Not assessed
6268	0.458531	0.219018	0.190632	0.0910146	0.0408043	7:144769879:G:GAAA	ENSG00000196511_TPK1.12018.84.3_sun_pQTL	ENSG00000196511_TPK1.12018.84.3_COVID_B1_h	rs372023067	-2.17679	0.649931	-3.45063	-0.902945	0.00081028	Not assessed	Not assessed
4940	0.199945	0.429692	0.104666	0.224893	0.0408037	2:27518370:T:C	ENSG00000084734_GCKR.5223.59.3_sun_pQTL	ENSG00000084734_GCKR.5223.59.3_COVID_D1_h	rs780094	-0.573074	0.247459	-1.05809	-0.0880628	0.0205675	Not assessed	Not assessed
7092	9.22396e-180	0.618517	5.08123e-180	0.340683	0.0408002	20:24919270:C:T	ENSG00000077984_CST7.3302.58.1_sun_pQTL	ENSG00000077984_CST7.3302.58.1_COVID_A2_h	rs2387362	0.0864305	0.0586275	-0.0284773	0.201338	0.14042	Not assessed	Not assessed
6770	0.0254483	0.481011	0.0227515	0.429997	0.0407923	11:3014074:G:C	ENSG00000110619_CARS.14098.28.3_sun_pQTL	ENSG00000110619_CARS.14098.28.3_COVID_A1_h	rs12417389	-1.07959	1.261	-3.55109	1.39192	0.391922	Not assessed	Not assessed
5879	0.223119	0.390204	0.125849	0.220051	0.0407774	22:37475678:C:G	ENSG00000100060_MFNG.5605.77.3_sun_pQTL	ENSG00000100060_MFNG.5605.77.3_COVID_A1_h	rs116906616	-1.65505	1.12973	-3.86929	0.559184	0.142923	Not assessed	Not assessed
5888	0	0.615952	0	0.343295	0.040753	11:118206239:C:G	ENSG00000160593_AMICA1.8232.90.3_sun_pQTL	ENSG00000160593_AMICA1.8232.90.3_COVID_A1_h	rs11600544	0.0865104	0.150271	-0.208015	0.381036	0.564821	Not assessed	Not assessed
5029	0.0003303	0.571727	0.000223584	0.386969	0.0407497	12:56163033:T:C	ENSG00000065361_ERBB3.2617.56.35_sun_pQTL	ENSG00000065361_ERBB3.2617.56.35_COVID_B1_h	rs76400083	0.088872	0.317778	-0.53396	0.711705	0.779733	Not assessed	Not assessed
4915	5.1917e-175	0.651881	2.44831e-175	0.307374	0.0407454	1:8974539:A:G	ENSG00000131686_CA6.3352.80.3_sun_pQTL	ENSG00000131686_CA6.3352.80.3_COVID_A1_h	rs3765963	-0.0641546	0.227313	-0.50968	0.381371	0.777767	Not assessed	Not assessed
7103	0.11389	0.448321	0.0804468	0.316634	0.0407086	19:2113751:T:C	ENSG00000133275_CSNK1G2.12653.13.3_sun_pQTL	ENSG00000133275_CSNK1G2.12653.13.3_COVID_A1_h	rs56225081	-1.3586	1.40663	-4.11555	1.39834	0.334115	Not assessed	Not assessed
5020	8.11515e-27	0.637442	4.09797e-27	0.321854	0.040704	16:2842369:C:A	ENSG00000005001_PRSS22.4534.10.2_sun_pQTL	ENSG00000005001_PRSS22.4534.10.2_COVID_A1_h	rs3810801	0.0368787	0.512166	-0.966948	1.0407	0.942598	Not assessed	Not assessed
3734	0.0300698	0.776005	0.00571772	0.147515	0.0406923	1:150790400:A:G	ENSG00000143384_MCL1.10358.33.3_sun_pQTL	ENSG00000143384_MCL1.10358.33.3_COVID_D1_h	rs11582441	-0.0579088	0.217652	-0.484499	0.368682	0.790192	Not assessed	Not assessed
6668	1.98511e-11	0.587712	1.25528e-11	0.371596	0.0406912	11:124750251:G:T	ENSG00000149564_ESAM.2981.9.3_sun_pQTL	ENSG00000149564_ESAM.2981.9.3_COVID_A1_h	rs11219769	-0.33667	0.719268	-1.74641	1.07307	0.639733	Not assessed	Not assessed
6011	1.91542e-06	0.589669	1.20093e-06	0.369668	0.0406604	18:31515925:A:G	ENSG00000046604_DSG2.9484.75.3_sun_pQTL	ENSG00000046604_DSG2.9484.75.3_COVID_A1_h	rs2704050	0.542282	0.919976	-1.26084	2.3454	0.555558	Not assessed	Not assessed
7366	0.287274	0.245735	0.229805	0.196535	0.0406508	4:65942067:C:T	ENSG00000145242_EPHA5.14089.41.3_sun_pQTL	ENSG00000145242_EPHA5.14089.41.3_COVID_A1_h	rs115156732	-2.17881	1.32303	-4.77191	0.414291	0.0995936	Not assessed	Not assessed
6961	0.0117409	0.599335	0.00669237	0.341585	0.0406471	19:53821741:G:T	ENSG00000189013_KIR2DL4.5095.7.3_sun_pQTL	ENSG00000189013_KIR2DL4.5095.7.3_COVID_A2_h	rs4632248	0.545914	0.32802	-0.0969939	1.18882	0.0960586	Not assessed	Not assessed
7307	0.0452586	0.523291	0.031114	0.359707	0.0406285	4:184650622:C:T	ENSG00000164305_CASP3.3593.72.3_sun_pQTL	ENSG00000164305_CASP3.3593.72.3_COVID_A1_h	rs12507711	0.307074	1.13322	-1.914	2.52815	0.786411	Not assessed	Not assessed
7298	0.417742	0.155323	0.281647	0.10468	0.0406081	12:9605744:G:A	ENSG00000069493_CLEC2D.7054.87.3_sun_pQTL	ENSG00000069493_CLEC2D.7054.87.3_COVID_B1_h	rs988711	2.30651	0.560259	1.20842	3.4046	3.84061e-05	Not assessed	Not assessed
5560	0.209638	0.105588	0.428444	0.215752	0.0405781	7:100168039:CAGAG:C	ENSG00000077454_LRCH4.8984.28.3_sun_pQTL	ENSG00000077454_LRCH4.8984.28.3_COVID_A2_h	rs150040950	2.26098	0.535317	1.21178	3.31018	2.40407e-05	Not assessed	Not assessed
6675	1.45603e-08	0.572913	9.82454e-09	0.386533	0.0405546	12:10376297:T:TAACA	ENSG00000213809_KLRK1.3056.11.1_sun_pQTL	ENSG00000213809_KLRK1.3056.11.1_COVID_A1_h	rs35866334	-0.513973	1.04386	-2.5599	1.53195	0.622452	Not assessed	Not assessed
6669	3.2365e-07	0.587727	2.0472e-07	0.371718	0.0405542	11:124750251:G:T	ENSG00000149564_ESAM.7841.84.3_sun_pQTL	ENSG00000149564_ESAM.7841.84.3_COVID_A1_h	rs11219769	-0.39359	0.840875	-2.04168	1.25449	0.639733	Not assessed	Not assessed
5314	8.71001e-09	0.647593	4.19494e-09	0.311855	0.0405518	2:205770145:G:A	ENSG00000118257_NRP2.6590.54.3_sun_pQTL	ENSG00000118257_NRP2.6590.54.3_COVID_A1_h	rs16837641	0.141151	0.747947	-1.3248	1.6071	0.850314	Not assessed	Not assessed
3828	0.0278715	0.721264	0.00782623	0.202488	0.0405503	1:150790400:A:G	ENSG00000143384_MCL1.10358.33.3_sun_pQTL	ENSG00000143384_MCL1.10358.33.3_COVID_A2_h	rs11582441	-0.116341	0.229836	-0.566812	0.334129	0.612722	Not assessed	Not assessed
7650	0.42165	0.227255	0.201814	0.108731	0.0405502	12:124526406:GC:G	ENSG00000150991_UBC.6647.55.3_sun_pQTL	ENSG00000150991_UBC.6647.55.3_COVID_B2_h	rs149533891	-1.0134	0.307015	-1.61514	-0.411661	0.000964054	Not assessed	Not assessed
7511	0.192559	0.355147	0.144781	0.266987	0.0405267	2:106165214:C:A	ENSG00000115652_UXS1.8258.22.3_sun_pQTL	ENSG00000115652_UXS1.8258.22.3_COVID_A1_h	rs1025869	2.05361	1.24208	-0.380818	4.48804	0.0982562	Not assessed	Not assessed
8013	2.96713e-14	0.711039	1.03696e-14	0.248456	0.0405055	5:126825998:C:T	ENSG00000113368_LMNB1.3889.64.2_sun_pQTL	ENSG00000113368_LMNB1.3889.64.2_COVID_C2_h	rs36105360	0.0761027	0.052055	-0.0259231	0.178129	0.14375	Not assessed	Not assessed
8045	2.20937e-06	0.542202	1.70055e-06	0.417291	0.0405032	3:194428971:G:A	ENSG00000178732_GP5.7185.29.3_sun_pQTL	ENSG00000178732_GP5.7185.29.3_COVID_A1_h	rs13064289	0.798828	0.871925	-0.910113	2.50777	0.359579	Not assessed	Not assessed
7183	0.117734	0.521363	0.0590319	0.261372	0.0404998	5:43878384:C:T	ENSG00000151882_CCL28.2890.59.2_sun_pQTL	ENSG00000151882_CCL28.2890.59.2_COVID_B2_h	rs112508860	-0.36571	0.223721	-0.804195	0.0727746	0.102118	Not assessed	Not assessed
5429	0.0430801	0.632002	0.0181529	0.266269	0.0404953	8:8471238:C:A	ENSG00000176782_DEFB104A.5763.67.3_sun_pQTL	ENSG00000176782_DEFB104A.5763.67.3_COVID_C2_h	rs553751473	0.236996	0.144686	-0.0465832	0.520576	0.101421	Not assessed	Not assessed
5738	2.75359e-11	0.619731	1.5099e-11	0.339783	0.0404855	20:45296914:A:G	ENSG00000124159_MATN4.7083.74.3_sun_pQTL	ENSG00000124159_MATN4.7083.74.3_COVID_A1_h	rs11697677	0.0140174	0.791123	-1.53655	1.56459	0.985864	Not assessed	Not assessed
7704	6.50245e-06	0.696577	2.45479e-06	0.26293	0.0404848	12:47735896:A:G	ENSG00000111405_ENDOU.5656.53.3_sun_pQTL	ENSG00000111405_ENDOU.5656.53.3_COVID_B2_h	rs11168214	-0.256322	0.128019	-0.507236	-0.00540915	0.0452614	Not assessed	Not assessed
6462	1.70861e-50	0.657584	7.84653e-51	0.301946	0.0404703	20:14701155:G:C	ENSG00000125848_FLRT3.13123.3.3_sun_pQTL	ENSG00000125848_FLRT3.13123.3.3_COVID_B1_h	rs1932952	0.185621	0.101746	-0.0137964	0.385039	0.0680967	Not assessed	Not assessed
7052	4.57896e-07	0.584215	2.94202e-07	0.375323	0.0404611	10:43148018:A:G	ENSG00000169826_CSGALNACT2.10772.21.3_sun_pQTL	ENSG00000169826_CSGALNACT2.10772.21.3_COVID_A1_h	rs2435349	-0.354539	0.863998	-2.04794	1.33887	0.681552	Not assessed	Not assessed
6551	1.37598e-306	0.582164	8.92148e-307	0.377418	0.0404173	5:96812030:A:G	ENSG00000164307_ERAP1.4964.67.1_sun_pQTL	ENSG00000164307_ERAP1.4964.67.1_COVID_A1_h	rs10045403	-0.00100028	0.197645	-0.388378	0.386377	0.995962	Not assessed	Not assessed
6879	1.73436e-104	0.591358	1.08012e-104	0.368243	0.0403995	1:157699488:C:T	ENSG00000160856_FCRL3.4440.15.2_sun_pQTL	ENSG00000160856_FCRL3.4440.15.2_COVID_A1_h	rs3761959	-0.19675	0.27566	-0.737033	0.343533	0.475388	Not assessed	Not assessed
4275	0.279596	0.40244	0.113804	0.163765	0.0403958	2:27189876:C:T	ENSG00000115234_SNX17.12845.18.3_sun_pQTL	ENSG00000115234_SNX17.12845.18.3_COVID_A1_h	rs11693001	2.04952	1.61122	-1.10841	5.20745	0.203362	Not assessed	Not assessed
6420	0.0421601	0.667279	0.0148691	0.235297	0.0403946	9:86099574:A:C	ENSG00000135052_GOLM1.8983.7.3_sun_pQTL	ENSG00000135052_GOLM1.8983.7.3_COVID_D1_h	rs191559811	0.575527	0.335708	-0.0824497	1.2335	0.0864617	Not assessed	Not assessed
6133	4.30461e-12	0.759048	1.13773e-12	0.200579	0.0403736	2:102223859:T:G	ENSG00000115598_IL1RL2.2994.71.2_sun_pQTL	ENSG00000115598_IL1RL2.2994.71.2_COVID_B2_h	rs34722443	-0.156297	0.0973983	-0.347194	0.0345997	0.108555	Not assessed	Not assessed
10235	0.0428194	0.550963	0.026386	0.339473	0.0403586	13:23814451:C:T	ENSG00000127863_TNFRSF19.5131.15.3_sun_pQTL	ENSG00000127863_TNFRSF19.5131.15.3_COVID_B2_h	rs141389489	-0.214627	0.163689	-0.535451	0.106197	0.189794	Not assessed	Not assessed
6859	1.32879e-05	0.561291	9.43135e-06	0.398346	0.04034	5:54957937:C:T	ENSG00000164283_ESM1.3805.16.2_sun_pQTL	ENSG00000164283_ESM1.3805.16.2_COVID_A1_h	rs3815925	-0.790944	0.922385	-2.59879	1.0169	0.391169	Not assessed	Not assessed
5622	7.21385e-57	0.642637	3.55931e-57	0.317036	0.0403277	2:206459558:A:G	ENSG00000114948_ADAM23.7049.2.3_sun_pQTL	ENSG00000114948_ADAM23.7049.2.3_COVID_A1_h	rs1921673	-0.0909419	0.3567	-0.790061	0.608177	0.798759	Not assessed	Not assessed
6844	2.26446e-25	0.565122	1.58126e-25	0.39458	0.0402988	9:111595379:T:A	ENSG00000106853_PTGR1.13543.7.3_sun_pQTL	ENSG00000106853_PTGR1.13543.7.3_COVID_A1_h	rs56912703	0.304159	0.490244	-0.656702	1.26502	0.534979	Not assessed	Not assessed
4930	0.0220371	0.796761	0.00379345	0.137114	0.0402944	8:85533122:C:G	ENSG00000133742_CA1.4969.2.1_sun_pQTL	ENSG00000133742_CA1.4969.2.1_COVID_C2_h	rs147156208	-0.0944212	0.0711452	-0.233863	0.0450208	0.184455	Not assessed	Not assessed
7648	0	0.552626	0	0.407178	0.0401961	19:55376727:C:T	ENSG00000160472_TMEM190.10442.1.3_sun_pQTL	ENSG00000160472_TMEM190.10442.1.3_COVID_A1_h	rs4806666	-0.117302	0.147523	-0.406441	0.171837	0.426529	Not assessed	Not assessed
6752	4.66762e-223	0.499315	4.30507e-223	0.460491	0.0401938	15:78942615:G:A	ENSG00000103811_CTSH.8465.52.3_sun_pQTL	ENSG00000103811_CTSH.8465.52.3_COVID_A1_h	rs34593439	-0.086816	0.21755	-0.513206	0.339574	0.689847	Not assessed	Not assessed
7250	5.85198e-07	0.552506	4.31443e-07	0.4073	0.0401927	2:53731782:C:A	ENSG00000068912_ERLEC1.8957.72.3_sun_pQTL	ENSG00000068912_ERLEC1.8957.72.3_COVID_A1_h	rs58359565	-0.468733	0.839788	-2.11469	1.17722	0.576738	Not assessed	Not assessed
5886	1.30343e-66	0.625563	6.96533e-67	0.334252	0.0401856	3:57108631:G:A	ENSG00000144730_IL17RD.3376.49.2_sun_pQTL	ENSG00000144730_IL17RD.3376.49.2_COVID_A1_h	rs6776722	0.0993467	0.374302	-0.634272	0.832966	0.790687	Not assessed	Not assessed
7364	1.37085e-23	0.625015	7.34409e-24	0.334801	0.0401837	14:69888141:A:C	ENSG00000198732_SMOC1.13118.5.3_sun_pQTL	ENSG00000198732_SMOC1.13118.5.3_COVID_B1_h	rs1958078	-0.192645	0.134619	-0.456494	0.0712027	0.152418	Not assessed	Not assessed
3392	0.350483	0.0727744	0.444339	0.0922226	0.0401813	12:110914450:G:C	ENSG00000089022_MAPKAPK5.3821.28.1_sun_pQTL	ENSG00000089022_MAPKAPK5.3821.28.1_COVID_C1_h	rs34254113	1.28715	0.300811	0.697573	1.87673	1.87788e-05	Not assessed	Not assessed
5189	0.00195295	0.734199	0.000593515	0.223088	0.040166	7:66824053:C:T	ENSG00000126522_ASL.11241.8.3_sun_pQTL	ENSG00000126522_ASL.11241.8.3_COVID_B2_h	rs6460315	0.311964	0.154134	0.00986799	0.614061	0.0429716	Not assessed	Not assessed
7343	1.6239e-100	0.542055	1.25173e-100	0.417786	0.0401596	11:102848803:C:T	ENSG00000262406_MMP12.4496.60.2_sun_pQTL	ENSG00000262406_MMP12.4496.60.2_COVID_A1_h	rs114176245	0.0592709	0.258596	-0.447567	0.566109	0.818711	Not assessed	Not assessed
6359	8.79223e-34	0.722975	2.88113e-34	0.236872	0.0401523	12:7102090:G:C	ENSG00000139178_C1RL.9348.1.3_sun_pQTL	ENSG00000139178_C1RL.9348.1.3_COVID_B2_h	rs191448232	-0.0197415	0.0667642	-0.150597	0.111114	0.767467	Not assessed	Not assessed
7084	6.40089e-05	0.709172	2.26246e-05	0.250624	0.0401181	7:97479644:T:C	ENSG00000006128_TAC1.9337.43.3_sun_pQTL	ENSG00000006128_TAC1.9337.43.3_COVID_C1_h	rs11977936	0.0947777	0.0813115	-0.0645899	0.254145	0.243771	Not assessed	Not assessed
5306	1.99848e-38	0.618907	1.10123e-38	0.341	0.0400934	3:128626336:A:G	ENSG00000163902_RPN1.10490.3.3_sun_pQTL	ENSG00000163902_RPN1.10490.3.3_COVID_A1_h	rs2712417	-0.0913432	0.433798	-0.941571	0.758884	0.833226	Not assessed	Not assessed
3864	6.88582e-09	0.700882	2.54532e-09	0.259039	0.0400796	16:67509619:G:A	ENSG00000159723_AGRP.2813.11.2_sun_pQTL	ENSG00000159723_AGRP.2813.11.2_COVID_B2_h	rs60697456	0.128437	0.0902722	-0.0484935	0.305367	0.154802	Not assessed	Not assessed
6314	0.0179182	0.587274	0.0105038	0.344225	0.0400793	2:102042353:GA:G	ENSG00000115594_IL1R1.2991.9.2_sun_pQTL	ENSG00000115594_IL1R1.2991.9.2_COVID_B1_h	rs11307311	2.39755	0.561748	1.29655	3.49856	1.97216e-05	Not assessed	Not assessed
7813	6.67871e-21	0.656589	3.08585e-21	0.303332	0.040079	16:4469438:G:A	ENSG00000153406_NMRAL1.13988.67.3_sun_pQTL	ENSG00000153406_NMRAL1.13988.67.3_COVID_D1_h	rs11557236	0.145664	0.105761	-0.0616251	0.352952	0.168424	Not assessed	Not assessed
5749	4.43502e-15	0.683825	1.79094e-15	0.276101	0.0400744	11:119336631:G:A	ENSG00000223953_C1QTNF5.7810.20.3_sun_pQTL	ENSG00000223953_C1QTNF5.7810.20.3_COVID_A2_h	rs2248863	-0.171273	0.119519	-0.405525	0.0629794	0.151852	Not assessed	Not assessed
5295	0.133707	0.512524	0.0649161	0.248795	0.0400573	5:82923054:TC:T	ENSG00000038427_VCAN.9561.21.3_sun_pQTL	ENSG00000038427_VCAN.9561.21.3_COVID_A1_h	rs35347145	-1.17682	1.59225	-4.29758	1.94393	0.459851	Not assessed	Not assessed
4900	0.353219	0.401796	0.0958913	0.109039	0.0400545	15:74278470:C:T	ENSG00000138623_SEMA7A.7019.13.3_sun_pQTL	ENSG00000138623_SEMA7A.7019.13.3_COVID_B2_h	rs146048582	-0.317437	0.168782	-0.648244	0.0133704	0.0600063	Not assessed	Not assessed
6070	0.0393628	0.561903	0.0234842	0.335196	0.0400534	12:6895897:C:T	ENSG00000111674_ENO2.10339.48.3_sun_pQTL	ENSG00000111674_ENO2.10339.48.3_COVID_A1_h	rs10849534	0.0841479	1.46101	-2.77938	2.94768	0.954071	Not assessed	Not assessed
5747	5.39782e-13	0.661398	2.43701e-13	0.298568	0.0400331	15:65400920:C:T	ENSG00000103742_IGDCC4.9793.145.3_sun_pQTL	ENSG00000103742_IGDCC4.9793.145.3_COVID_B2_h	rs35223184	0.0770617	0.126717	-0.171298	0.325422	0.543094	Not assessed	Not assessed
3573	0.287251	0.428478	0.0980407	0.146202	0.0400281	10:72879221:C:T	ENSG00000138308_PLA2G12B.9380.2.3_sun_pQTL	ENSG00000138308_PLA2G12B.9380.2.3_COVID_A1_h	rs11000435	-0.135178	1.66103	-3.39073	3.12038	0.935138	Not assessed	Not assessed
6360	0	0.604854	0	0.355122	0.0400236	3:9949116:G:C	ENSG00000163703_CRELD1.7628.40.3_sun_pQTL	ENSG00000163703_CRELD1.7628.40.3_COVID_A1_h	rs59465469	0.0269205	0.159455	-0.285606	0.339448	0.865932	Not assessed	Not assessed
6529	2.15839e-33	0.655366	1.00338e-33	0.304622	0.0400119	1:64148812:G:T	ENSG00000185483_ROR1.2590.69.4_sun_pQTL	ENSG00000185483_ROR1.2590.69.4_COVID_B1_h	rs1408416	-0.161443	0.109852	-0.37675	0.0538633	0.14166	Not assessed	Not assessed
[truncated: 20,432 more rows]
