# Supplementary material for: A proteome-wide genetic investigation identifies several SARS-CoV-2-exploited host targets of clinical relevance
Source: eLife. 2021 Aug 17;10:e69719. doi: 10.7554/eLife.69719 (PMC8457835; doi:10.7554/eLife.69719)
Supplement: Supplementary file 8. [file elife-69719-supp8.xlsx]

## Sheet: Sheet1
Phenome-wide association using colocalising SNPs of proteins that colocalise with COVID phenotypes
snp	rsid	probe	PMID	Author	Trait	beta	se	pval	nTotal	nCases
1:155133406:T:G	rs4971066	THBS3.8982.65.3		UKB Neale v2	Epilepsy | non-cancer illness code, self-reported	-0.0988673	0.0351255	0.00488199	361141	3015
1:155133406:T:G	rs4971066	THBS3.8982.65.3		UKB Neale v2	Arm fat-free mass (left)	-0.00616908	0.0015134	4.5766e-05	354668
1:155133406:T:G	rs4971066	THBS3.8982.65.3	PMID:30598549	Morris JA	Heel bone mineral density	-0.0109225	0.00248588	2.4e-05	426824
1:155133406:T:G	rs4971066	THBS3.8982.65.3		UKB SAIGE	Chronic airway obstruction	0.0509	0.0195004	0.00916	386007	10502
1:155133406:T:G	rs4971066	THBS3.8982.65.3		UKB Neale v2	Pulse rate, automated reading	0.0781401	0.0369261	0.0343351	340162
1:155133406:T:G	rs4971066	THBS3.8982.65.3		UKB Neale v2	Alfacalcidol | treatment/medication code	-0.2687	0.109661	0.0142733	361141	307			Legend
1:155133406:T:G	rs4971066	THBS3.8982.65.3		UKB Neale v2	Body mass index (bmi)	-0.0484825	0.0151831	0.00140728	354831				snp	colocalising SNP used for phewas , in the format chr:pos:ref:alt with position from GRCh38 build
1:155133406:T:G	rs4971066	THBS3.8982.65.3		UKB SAIGE	Circulatory disease nec	-0.0328	0.0157003	0.0361	404271	16366			probe	protein probe that colocalised with a COVID trait at PP.H4 > 0.6
1:155133406:T:G	rs4971066	THBS3.8982.65.3		UKB SAIGE	Pancreatic cancer	-0.163	0.0795015	0.0401	393961	589			PMID	PubMed ID of study
1:155133406:T:G	rs4971066	THBS3.8982.65.3		UKB Neale v2	Sarcoma/fibrosarcoma | cancer code, self-reported	0.341797	0.137234	0.0127513	361141	196			Author	First author of study or group
1:155133406:T:G	rs4971066	THBS3.8982.65.3		UKB Neale v2	Glimepiride | treatment/medication code	0.278792	0.10756	0.00954196	361141	319			Trait	Phewas trait
1:155133406:T:G	rs4971066	THBS3.8982.65.3		UKB SAIGE	Poisoning/allergy of sulfonamides	-0.186	0.0652012	0.00429	382671	874			beta	effect per ALT allele of snp on Trait
1:155133406:T:G	rs4971066	THBS3.8982.65.3	PMID:29255261	Luciano M	Neuroticism	0.0178	0.0056871	0.00174864	329821				se	standard error of beta
1:155133406:T:G	rs4971066	THBS3.8982.65.3		UKB SAIGE	Benign neoplasm of other parts of digestive system	0.14	0.0269005	1.95e-07	400581	5280			pval	p-value of beta
1:155133406:T:G	rs4971066	THBS3.8982.65.3		UKB Neale v2	Ever believed in un-real communications or signs	0.183981	0.0670491	0.00607017	117731	822			nTotal	Total number of study participants
1:155133406:T:G	rs4971066	THBS3.8982.65.3		UKB Neale v2	Allopurinol | treatment/medication code	-0.121014	0.029927	5.26234e-05	361141	4108			nCases	If trait is binary, number of cases
1:155133406:T:G	rs4971066	THBS3.8982.65.3		UKB Neale v2	Trunk fat-free mass	-0.0495919	0.0103661	1.71864e-06	354530
1:155133406:T:G	rs4971066	THBS3.8982.65.3		UKB Neale v2	Current tobacco smoking	-0.00425616	0.00174304	0.0146145	360797
1:155133406:T:G	rs4971066	THBS3.8982.65.3		UKB Neale v2	Whole body fat mass	-0.0849824	0.0296595	0.00416682	354244
1:155133406:T:G	rs4971066	THBS3.8982.65.3		UKB SAIGE	Hypertrophy of breast (gynecomastia)	0.13	0.0659012	0.049	402600	854
1:155133406:T:G	rs4971066	THBS3.8982.65.3		UKB SAIGE	Reflux esophagitis	0.0385	0.0193004	0.0457	379826	10551
1:155133406:T:G	rs4971066	THBS3.8982.65.3		UKB SAIGE	Fracture of clavicle or scapula	0.0988	0.0493009	0.0452	389286	1521
1:155133406:T:G	rs4971066	THBS3.8982.65.3		UKB Neale v2	Dark brown | hair colour (natural, before greying)	-0.0170643	0.00659879	0.00970965	360270	134627
1:155133406:T:G	rs4971066	THBS3.8982.65.3		UKB Neale v2	Nitrogen oxides air pollution; 2010	-0.0974467	0.047742	0.0412409	356078
1:155133406:T:G	rs4971066	THBS3.8982.65.3		UKB Neale v2	Interstitial lung disease | non-cancer illness code, self-reported	-0.449028	0.174607	0.0101208	361141	121
1:155133406:T:G	rs4971066	THBS3.8982.65.3		UKB Neale v2	Eosinophill percentage	0.0141144	0.00596453	0.0179632	349861
1:155133406:T:G	rs4971066	THBS3.8982.65.3		UKB Neale v2	Neuroticism score	0.033418	0.0113615	0.00326807	293006
1:155133406:T:G	rs4971066	THBS3.8982.65.3		UKB Neale v2	Doctor diagnosed lung cancer (not mesothelioma)	0.438373	0.181977	0.0159988	91787	111
1:155133406:T:G	rs4971066	THBS3.8982.65.3		UKB Neale v2	Leg fat-free mass (right)	-0.0214617	0.00387393	3.02643e-08	354798
1:155133406:T:G	rs4971066	THBS3.8982.65.3		UKB SAIGE	Paroxysmal tachycardia, unspecified	-0.0834	0.0342006	0.0149	384144	3225
1:155133406:T:G	rs4971066	THBS3.8982.65.3		UKB SAIGE	Fracture of hand or wrist	0.101	0.0332006	0.00226	391122	3357
1:155133406:T:G	rs4971066	THBS3.8982.65.3		UKB Neale v2	Fibromyalgia | non-cancer illness code, self-reported	-0.180128	0.0832234	0.0304319	361141	533
1:155133406:T:G	rs4971066	THBS3.8982.65.3	PMID:27863252	Astle WJ	Hemoglobin concentration	0.0283882	0.00483009	4.169e-09	172925
1:155133406:T:G	rs4971066	THBS3.8982.65.3		UKB Neale v2	Breast cancer | illnesses of mother	0.0261019	0.0119123	0.0284375	330828	27622
1:155133406:T:G	rs4971066	THBS3.8982.65.3		UKB Neale v2	Impedance of leg (right)	0.564412	0.103708	5.26242e-08	354817
1:155133406:T:G	rs4971066	THBS3.8982.65.3		UKB Neale v2	Frequency of solarium/sunlamp use	-0.00278486	0.00114067	0.0146297	340643
1:155133406:T:G	rs4971066	THBS3.8982.65.3		UKB SAIGE	Gout	-0.0947	0.0345006	0.00609	408393	3195
1:155133406:T:G	rs4971066	THBS3.8982.65.3		UKB Neale v2	Hand grip strength (left)	-0.0857813	0.0241475	0.000381796	359704
1:155133406:T:G	rs4971066	THBS3.8982.65.3	PMID:29942085	Nagel M	Depressed affect	0.009359	0.003153	0.002996	357957
1:155133406:T:G	rs4971066	THBS3.8982.65.3		UKB Neale v2	Hip circumference	-0.0773169	0.0292032	0.00810809	360521
1:155133406:T:G	rs4971066	THBS3.8982.65.3		UKB Neale v2	Atenolol | treatment/medication code	-0.0345651	0.0164397	0.0355031	361141	13951
1:155133406:T:G	rs4971066	THBS3.8982.65.3		UKB Neale v2	Fried potatoes intake	-0.0207789	0.00950744	0.0288535	51427
1:155133406:T:G	rs4971066	THBS3.8982.65.3		UKB Neale v2	Parkinson's disease | illnesses of siblings	-0.103837	0.0492516	0.0350034	279018	1464
1:155133406:T:G	rs4971066	THBS3.8982.65.3		UKB SAIGE	Skull and face fracture and other intercranial injury	0.0727	0.0356007	0.0414	408511	2957
1:155133406:T:G	rs4971066	THBS3.8982.65.3		UKB SAIGE	Epilepsy, recurrent seizures, convulsions	-0.0589	0.0273005	0.0309	400296	5087
1:155133406:T:G	rs4971066	THBS3.8982.65.3		UKB SAIGE	Intestinal infection	-0.0426	0.0204004	0.0369	408961	8991
1:155133406:T:G	rs4971066	THBS3.8982.65.3		UKB SAIGE	Kidney replaced by transpant	-0.202	0.100002	0.0438	397971	369
1:155133406:T:G	rs4971066	THBS3.8982.65.3		UKB Neale v2	Weight	-0.186928	0.0450163	3.29006e-05	360116
1:155133406:T:G	rs4971066	THBS3.8982.65.3		UKB Neale v2	Whole body fat-free mass	-0.101295	0.0200876	4.59328e-07	354808
1:155133406:T:G	rs4971066	THBS3.8982.65.3		UKB Neale v2	Diclofenac | treatment/medication code	-0.0485625	0.0223328	0.0296662	361141	7545
1:155133406:T:G	rs4971066	THBS3.8982.65.3		UKB Neale v2	Heel bone mineral density (bmd) t-score, automated (right)	-0.0194499	0.0067298	0.00385165	114614
1:155133406:T:G	rs4971066	THBS3.8982.65.3		UKB Neale v2	Hearing difficulty/problems with background noise	0.0205569	0.00655888	0.00172293	353983	134141
1:155133406:T:G	rs4971066	THBS3.8982.65.3	PMID:29083406	Ferreira MA	Allergic disease (asthma, hay fever or eczema)	0.0215	0.0078	0.005876	360838	180129
1:155133406:T:G	rs4971066	THBS3.8982.65.3		UKB SAIGE	Sinoatrial node dysfunction (bradycardia)	0.198	0.0957018	0.0388	381322	403
1:155133406:T:G	rs4971066	THBS3.8982.65.3		UKB Neale v2	Heel broadband ultrasound attenuation (right)	-0.259305	0.104694	0.0132586	114609
1:155133406:T:G	rs4971066	THBS3.8982.65.3		UKB Neale v2	Participant wanted to stop early | completion status of test	-0.23479	0.0837854	0.00507519	54007	528
1:155133406:T:G	rs4971066	THBS3.8982.65.3		UKB Neale v2	Carrot intake	-0.0237468	0.0106008	0.0250894	51427
1:155133406:T:G	rs4971066	THBS3.8982.65.3		UKB Neale v2	Headaches for 3+ months	0.0351789	0.0143693	0.0143574	70181	32075
1:155133406:T:G	rs4971066	THBS3.8982.65.3		UKB Neale v2	Dicloflex 25mg e/c tablet | treatment/medication code	-0.200422	0.0926784	0.0305726	361141	430
1:155133406:T:G	rs4971066	THBS3.8982.65.3		UKB SAIGE	Fracture of upper limb	0.0719	0.0213004	0.000749	396286	8521
1:155133406:T:G	rs4971066	THBS3.8982.65.3		UKB Neale v2	Probable recurrent major depression (severe) | bipolar and major depression status	0.05478	0.0251894	0.0296501	86895	6304
1:155133406:T:G	rs4971066	THBS3.8982.65.3		UKB Neale v2	Number of full sisters	-0.0067009	0.00247426	0.00676448	355390
1:155133406:T:G	rs4971066	THBS3.8982.65.3		UKB Neale v2	Madopar 62.5 capsule | treatment/medication code	0.424476	0.181503	0.0193502	361141	112
1:155133406:T:G	rs4971066	THBS3.8982.65.3		UKB Neale v2	Impedance of whole body	0.983996	0.213869	4.20736e-06	354795
1:155133406:T:G	rs4971066	THBS3.8982.65.3		UKB SAIGE	Atrial fibrillation and flutter	-0.0418	0.0168003	0.0129	395739	14820
1:155133406:T:G	rs4971066	THBS3.8982.65.3		UKB Neale v2	Persantin 25mg tablet | treatment/medication code	-0.25981	0.131006	0.0473425	361141	215
1:155133406:T:G	rs4971066	THBS3.8982.65.3		UKB Neale v2	Recent feelings of tiredness or low energy	0.00911052	0.00450848	0.0433078	117828
1:155133406:T:G	rs4971066	THBS3.8982.65.3		UKB Neale v2	Hands-free device/speakerphone use with mobile phone in last 3 month	-0.00605859	0.00287994	0.0354036	302733
1:155133406:T:G	rs4971066	THBS3.8982.65.3		UKB Neale v2	Haematocrit percentage	0.060222	0.00932753	1.07385e-10	350475
1:155133406:T:G	rs4971066	THBS3.8982.65.3		UKB SAIGE	Nonrheumatic mitral valve disorders	-0.0752	0.0361007	0.0371	405313	2892
1:155133406:T:G	rs4971066	THBS3.8982.65.3		UKB Neale v2	A gas fire that you use regularly in winter time | gas or solid-fuel cooking/heating	-0.0208251	0.00648704	0.00132599	360066	145315
1:155133406:T:G	rs4971066	THBS3.8982.65.3		UKB Neale v2	Biscuit cereal (e.g. weetabix) | cereal type	-0.0188308	0.00916126	0.0398299	299898	53310
1:155133406:T:G	rs4971066	THBS3.8982.65.3	PMID:30053915	Scepanovic P	Anti-Toxoplasma gondii IgG levels	-0.0951128	0.0339771	0.00530087	559
1:155133406:T:G	rs4971066	THBS3.8982.65.3		UKB Neale v2	Doctor diagnosed sarcoidosis	0.205833	0.0966224	0.0331482	91787	395
1:155133406:T:G	rs4971066	THBS3.8982.65.3		UKB Neale v2	Hot drink temperature	0.00708586	0.00182338	0.000101881	357256
1:155133406:T:G	rs4971066	THBS3.8982.65.3		UKB Neale v2	Number of diet questionnaires completed	0.0158974	0.00573472	0.00556981	156401
1:155133406:T:G	rs4971066	THBS3.8982.65.3		UKB Neale v2	Ever believed in an un-real conspiracy against self	0.160844	0.0629547	0.0106212	117794	932
1:155133406:T:G	rs4971066	THBS3.8982.65.3		UKB Neale v2	3mm weak meridian angle (right)	-0.910677	0.452134	0.0439948	75410
1:155133406:T:G	rs4971066	THBS3.8982.65.3		UKB Neale v2	Home location at assessment - north co-ordinate (rounded)	-1003.94	416.048	0.0158205	357793
1:155133406:T:G	rs4971066	THBS3.8982.65.3	PMID:30061737	Nielsen JB	Atrial fibrillation	-0.0421	0.009	2.783e-06	1030836	60620
1:155133406:T:G	rs4971066	THBS3.8982.65.3		UKB Neale v2	6mm strong meridian (right)	-0.0278815	0.0113186	0.0137678	66256
1:155133406:T:G	rs4971066	THBS3.8982.65.3		UKB Neale v2	Elective caesarean section | delivery methods	-0.17968	0.0609462	0.00320518	8019	1157
1:155133406:T:G	rs4971066	THBS3.8982.65.3		UKB Neale v2	Rarely/never | workplace very cold	0.0465678	0.0178679	0.00915458	90696	13643
1:155133406:T:G	rs4971066	THBS3.8982.65.3		UKB Neale v2	Invitation to complete online 24-hour recall dietary questionnaire, acceptance	0.0454628	0.0175546	0.0096027	218234	70065
1:155133406:T:G	rs4971066	THBS3.8982.65.3		UKB Neale v2	Egg consumers	-0.0484453	0.0208726	0.0202887	51427	10817
1:155133406:T:G	rs4971066	THBS3.8982.65.3		UKB SAIGE	Chronic lymphocytic thyroiditis	-0.309	0.133002	0.0202	391639	210
1:155133406:T:G	rs4971066	THBS3.8982.65.3		UKB Neale v2	Voltarol 25mg e/c tablet | treatment/medication code	-0.191757	0.0953755	0.0443695	361141	406
1:155133406:T:G	rs4971066	THBS3.8982.65.3	PMID:30220432	Haas ME	Urinary albumin excretion	0.00944619	0.002261	2.9431e-05	382500
1:155133406:T:G	rs4971066	THBS3.8982.65.3		UKB Neale v2	Father still alive	-0.0175988	0.00655224	0.00723219	351538	81229
1:155133406:T:G	rs4971066	THBS3.8982.65.3	PMID:27863252	Astle WJ	Platelet count	0.0177766	0.00496117	0.0003395	166066
1:155133406:T:G	rs4971066	THBS3.8982.65.3		UKB Neale v2	Worry too long after embarrassment	0.0195483	0.00645805	0.00246996	346527	165310
1:155133406:T:G	rs4971066	THBS3.8982.65.3		UKB Neale v2	See anyone from psychiatric or mental health services, including liaison services | actions taken following self-harm	0.102387	0.0468347	0.0288053	117733	1693
1:155133406:T:G	rs4971066	THBS3.8982.65.3		UKB SAIGE	Cellulitis and abscess of arm/hand	0.0626	0.0261005	0.0165	403174	5539
1:155133406:T:G	rs4971066	THBS3.8982.65.3		UKB Neale v2	Nebivolol | treatment/medication code	-0.238685	0.110922	0.0314088	361141	300
1:155133406:T:G	rs4971066	THBS3.8982.65.3		UKB Neale v2	Arm fat mass (left)	-0.00668349	0.0022066	0.00245495	354673
1:155133406:T:G	rs4971066	THBS3.8982.65.3		UKB SAIGE	Carditis	-0.128	0.0430008	0.00282	407799	2020
1:155133406:T:G	rs4971066	THBS3.8982.65.3		UKB SAIGE	Alzheimer's disease	-0.239	0.0960018	0.0127	402787	404
1:155133406:T:G	rs4971066	THBS3.8982.65.3		UKB Neale v2	Corneal resistance factor (left)	-0.0375604	0.0179717	0.0366236	76510
1:155133406:T:G	rs4971066	THBS3.8982.65.3		UKB Neale v2	Leg fat-free mass (left)	-0.0208229	0.00388265	8.18756e-08	354771
1:155133406:T:G	rs4971066	THBS3.8982.65.3		UKB SAIGE	Cellulitis and abscess of foot, toe	0.0621	0.0262005	0.0178	403137	5502
1:155133406:T:G	rs4971066	THBS3.8982.65.3		UKB Neale v2	Standing height	-0.0514825	0.0201871	0.0107643	360388
1:155133406:T:G	rs4971066	THBS3.8982.65.3		UKB SAIGE	Cerebral artery occlusion, with cerebral infarction	-0.112	0.0500009	0.0248	400518	1501
1:155133406:T:G	rs4971066	THBS3.8982.65.3		UKB Neale v2	Heel bone mineral density (bmd) t-score, automated (left)	-0.0236748	0.00683497	0.000532832	114630
1:155133406:T:G	rs4971066	THBS3.8982.65.3		UKB SAIGE	Chronic periodontitis	0.163	0.0810015	0.0437	398697	561
1:155133406:T:G	rs4971066	THBS3.8982.65.3		UKB Neale v2	Place of birth in uk - north co-ordinate	-945.578	387.43	0.0146616	338701
1:155133406:T:G	rs4971066	THBS3.8982.65.3		UKB Neale v2	Platelet crit	0.000762387	0.000151019	4.46024e-07	350471
1:155133406:T:G	rs4971066	THBS3.8982.65.3		UKB SAIGE	Premature beats	0.168	0.0830015	0.043	381455	536
1:155133406:T:G	rs4971066	THBS3.8982.65.3		UKB Neale v2	Effect of standing still | leg pain on walking	-0.0632842	0.0262259	0.0158263	22495	8800
1:155133406:T:G	rs4971066	THBS3.8982.65.3		UKB Neale v2	Dothiepin | treatment/medication code	0.34488	0.157909	0.0289578	361141	148
1:155133406:T:G	rs4971066	THBS3.8982.65.3		UKB Neale v2	Number of unsuccessful stop-smoking attempts	0.0118814	0.00526949	0.0241517	81026
1:155133406:T:G	rs4971066	THBS3.8982.65.3		UKB Neale v2	Number of children fathered	-0.0114789	0.00380928	0.00258372	165492
1:155133406:T:G	rs4971066	THBS3.8982.65.3		UKB Neale v2	Never/rarely use spread | spread type	0.0235372	0.010564	0.025875	360291	36579
1:155133406:T:G	rs4971066	THBS3.8982.65.3		UKB SAIGE	Retinal hemorrhage/ischemia	-0.361	0.178003	0.0427	396975	116
1:155133406:T:G	rs4971066	THBS3.8982.65.3		UKB Neale v2	High cholesterol | non-cancer illness code, self-reported	0.0186765	0.00952872	0.0499902	361141	43957
1:155133406:T:G	rs4971066	THBS3.8982.65.3		UKB Neale v2	Ever thought that life not worth living	0.0121203	0.0042551	0.0043944	117291
1:155133406:T:G	rs4971066	THBS3.8982.65.3		UKB Neale v2	Pulse wave peak to peak time	-1.03557	0.39608	0.00893602	118787
1:155133406:T:G	rs4971066	THBS3.8982.65.3		UKB Neale v2	Weight	-0.186109	0.0452012	3.83335e-05	354838
1:155133406:T:G	rs4971066	THBS3.8982.65.3		UKB Neale v2	Arm fat percentage (left)	-0.0558704	0.02416	0.0207501	354707
1:155133406:T:G	rs4971066	THBS3.8982.65.3		UKB Neale v2	Witnessed sudden violent death	0.0346884	0.0161114	0.0313149	117862	15959
1:155133406:T:G	rs4971066	THBS3.8982.65.3		UKB Neale v2	Forced vital capacity (fvc)	-0.00591881	0.00248735	0.0173337	329404
1:155133406:T:G	rs4971066	THBS3.8982.65.3		UKB Neale v2	Platelet count	0.823352	0.187963	1.18494e-05	350474
1:155133406:T:G	rs4971066	THBS3.8982.65.3		UKB Neale v2	6mm weak meridian (left)	-0.027292	0.0111149	0.0140739	65551
1:155133406:T:G	rs4971066	THBS3.8982.65.3		UKB Neale v2	Herpes simplex | non-cancer illness code, self-reported	0.307525	0.154811	0.0469779	361141	154
1:155133406:T:G	rs4971066	THBS3.8982.65.3		UKB Neale v2	Alverine | treatment/medication code	0.252955	0.128652	0.0492733	361141	223
1:155133406:T:G	rs4971066	THBS3.8982.65.3		UKB Neale v2	Current | smoking status	-0.0242119	0.0104703	0.0207513	359706	37088
1:155133406:T:G	rs4971066	THBS3.8982.65.3		UKB Neale v2	Worrier / anxious feelings	0.0138977	0.00644205	0.0309772	351833	152370
1:155133406:T:G	rs4971066	THBS3.8982.65.3		UKB Neale v2	Heel quantitative ultrasound index (qui), direct entry (right)	-0.344525	0.119206	0.00385096	114614
1:155133406:T:G	rs4971066	THBS3.8982.65.3		UKB Neale v2	Often | workplace full of chemical or other fumes	0.0565582	0.025485	0.026468	88735	5872
1:155133406:T:G	rs4971066	THBS3.8982.65.3		UKB Neale v2	Equally left and right | usual side of head for mobile phone use	-0.0304736	0.0141003	0.0306768	303009	19852
1:155133406:T:G	rs4971066	THBS3.8982.65.3	PMID:28869591	Kemp JP	Heel bone mineral density	-0.0178168	0.00455878	4e-05	142487
1:155133406:T:G	rs4971066	THBS3.8982.65.3	PMID:28887542	Prins BP	Urea levels	-0.01	0	0.00762919	9818
1:155133406:T:G	rs4971066	THBS3.8982.65.3		UKB Neale v2	None of the above | mouth/teeth dental problems	-0.0191701	0.00650531	0.00321012	359841	141495
1:155133406:T:G	rs4971066	THBS3.8982.65.3		UKB Neale v2	Icd10: c15.9 oesophagus, unspecified | underlying (primary) cause of death	0.261603	0.11466	0.0225359	9092	296
1:155133406:T:G	rs4971066	THBS3.8982.65.3		UKB Neale v2	All of the above | manic/hyper symptoms	0.0921878	0.0412829	0.0255505	24049	2431
1:155133406:T:G	rs4971066	THBS3.8982.65.3		UKB SAIGE	Gout and other crystal arthropathies	-0.0823	0.0318006	0.00959	408961	3763
1:155133406:T:G	rs4971066	THBS3.8982.65.3		UKB SAIGE	Thyroiditis	-0.243	0.113002	0.0308	391722	293
1:155133406:T:G	rs4971066	THBS3.8982.65.3		UKB Neale v2	Infective/viral hepatitis | non-cancer illness code, self-reported	-0.163312	0.0693788	0.0185746	361141	768
1:155133406:T:G	rs4971066	THBS3.8982.65.3		UKB SAIGE	Other specified cardiac dysrhythmias	-0.0684	0.0341006	0.0449	384155	3236
1:155133406:T:G	rs4971066	THBS3.8982.65.3		UKB Neale v2	Epanutin 25mg capsule | treatment/medication code	-0.231418	0.117147	0.0482139	361141	269
1:155133406:T:G	rs4971066	THBS3.8982.65.3		UKB Neale v2	Whole body water mass	-0.0755433	0.0147941	3.2866e-07	354834
1:155133406:T:G	rs4971066	THBS3.8982.65.3		UKB Neale v2	Savoury snack consumers	-0.0361212	0.0176872	0.0411316	51427	18335
1:155133406:T:G	rs4971066	THBS3.8982.65.3		UKB SAIGE	Open wound of ear	0.298	0.137003	0.03	400622	196
1:155133406:T:G	rs4971066	THBS3.8982.65.3		UKB Neale v2	Rizatriptan | treatment/medication code	0.221505	0.112431	0.0488179	361141	292
1:155133406:T:G	rs4971066	THBS3.8982.65.3		UKB Neale v2	College or university degree | qualifications	0.0150004	0.00676409	0.0265767	357549	115981
1:155133406:T:G	rs4971066	THBS3.8982.65.3		UKB SAIGE	Cyst of kidney, acquired	-0.122	0.054301	0.0245	398862	1260
1:155133406:T:G	rs4971066	THBS3.8982.65.3		UKB SAIGE	Symptoms concerning nutrition, metabolism, and development	-0.0643	0.0263005	0.0146	408961	5512
1:155133406:T:G	rs4971066	THBS3.8982.65.3		UKB Neale v2	Hand grip strength (right)	-0.0768973	0.0241485	0.00145094	359729
1:155133406:T:G	rs4971066	THBS3.8982.65.3		UKB SAIGE	Complication of amputation stump	0.381	0.147003	0.00953	400597	171
1:155133406:T:G	rs4971066	THBS3.8982.65.3		UKB Neale v2	Leg predicted mass (left)	-0.019426	0.00364055	9.50784e-08	354766
1:155133406:T:G	rs4971066	THBS3.8982.65.3		UKB Neale v2	Alcohol dependency | non-cancer illness code, self-reported	-0.189412	0.0811048	0.0195214	361141	561
1:155133406:T:G	rs4971066	THBS3.8982.65.3		UKB Neale v2	Ever attempted suicide	0.117071	0.0536065	0.0290142	4933	2275
1:155133406:T:G	rs4971066	THBS3.8982.65.3	PMID:27863252	Astle WJ	Red blood cell count	0.019632	0.0048421	5.025e-05	172952
1:155133406:T:G	rs4971066	THBS3.8982.65.3		UKB Neale v2	Emphysema/chronic bronchitis | non-cancer illness code, self-reported	0.0676854	0.0272191	0.0128926	361141	5031
1:155133406:T:G	rs4971066	THBS3.8982.65.3		UKB Neale v2	Tennis elbow / lateral epicondylitis | non-cancer illness code, self-reported	0.378858	0.139013	0.0064229	361141	191
1:155133406:T:G	rs4971066	THBS3.8982.65.3	PMID:27863252	Astle WJ	Mean corpuscular volume	0.00941794	0.00480473	0.04998	172433
1:155133406:T:G	rs4971066	THBS3.8982.65.3		UKB Neale v2	Impedance of arm (left)	0.387454	0.125583	0.0020341	354807
1:155133406:T:G	rs4971066	THBS3.8982.65.3		UKB Neale v2	Ground coffee (include espresso, filter etc) | coffee type	0.0201371	0.0085489	0.0184957	283449	64962
1:155133406:T:G	rs4971066	THBS3.8982.65.3		UKB SAIGE	Hereditary hemolytic anemias	-0.316	0.154003	0.0402	390182	156
1:155133406:T:G	rs4971066	THBS3.8982.65.3		UKB SAIGE	Aortic aneurysm	0.105	0.052001	0.0442	401969	1374
1:155133406:T:G	rs4971066	THBS3.8982.65.3		UKB Neale v2	Intra-ocular pressure, goldmann-correlated (left)	-0.0617998	0.0276828	0.0255896	76510
1:155133406:T:G	rs4971066	THBS3.8982.65.3		UKB Neale v2	Hypothyroidism/myxoedema | non-cancer illness code, self-reported	-0.0291182	0.0146689	0.0471385	361141	17574
1:155133406:T:G	rs4971066	THBS3.8982.65.3		UKB SAIGE	Cough	0.0833	0.0361007	0.021	402717	2884
1:155133406:T:G	rs4971066	THBS3.8982.65.3		UKB Neale v2	Body mass index (bmi)	-0.0501444	0.0151257	0.000915958	359983
1:155133406:T:G	rs4971066	THBS3.8982.65.3		UKB SAIGE	Cardiac dysrhythmias	-0.029	0.0131002	0.0263	405600	24681
1:155133406:T:G	rs4971066	THBS3.8982.65.3		UKB Neale v2	Any other type of psychosis or psychotic illness | mental health problems ever diagnosed by a professional	0.211246	0.0903842	0.0194278	117707	450
1:155133406:T:G	rs4971066	THBS3.8982.65.3		UKB Neale v2	Mood swings	0.0193671	0.00644023	0.00263622	352604	158982
1:155133406:T:G	rs4971066	THBS3.8982.65.3		UKB Neale v2	Bipolar ii disorder | bipolar and major depression status	0.210573	0.0858153	0.0141366	86895	508
1:155133406:T:G	rs4971066	THBS3.8982.65.3		UKB SAIGE	Dementias	-0.153	0.0624011	0.0145	403339	956
1:155133406:T:G	rs4971066	THBS3.8982.65.3		UKB Neale v2	Allergy or anaphylactic reaction to food | non-cancer illness code, self-reported	0.115677	0.047805	0.0155288	361141	1621
1:155133406:T:G	rs4971066	THBS3.8982.65.3		UKB SAIGE	Hallux valgus (bunion)	0.0593	0.0242004	0.0142	401613	6699
1:155133406:T:G	rs4971066	THBS3.8982.65.3		UKB Neale v2	None of the above (group 1) | illnesses of siblings	0.0174894	0.00760344	0.0214357	281979	91010
1:155133406:T:G	rs4971066	THBS3.8982.65.3		UKB Neale v2	Spinal anaesthetic | anaesthetics administered during delivery	-0.125616	0.0635564	0.0481823	3780	1254
1:155133406:T:G	rs4971066	THBS3.8982.65.3		UKB Neale v2	Stroke | illnesses of siblings	-0.0436887	0.0196604	0.0262696	279577	9197
1:155133406:T:G	rs4971066	THBS3.8982.65.3		UKB SAIGE	Heart valve disorders	-0.0591	0.0300006	0.0485	406660	4239
1:155133406:T:G	rs4971066	THBS3.8982.65.3		UKB Neale v2	Leg fat mass (right)	-0.0133033	0.00502433	0.00810274	354807
1:155133406:T:G	rs4971066	THBS3.8982.65.3	PMID:28604731	Hammerschlag AR	Insomnia complaints	0.0501081	0.0195166	0.0102445	53639	12863
1:155133406:T:G	rs4971066	THBS3.8982.65.3		UKB Neale v2	Used an inhaler for chest within last hour	0.0784719	0.0391475	0.0450106	331625	2424
1:155133406:T:G	rs4971066	THBS3.8982.65.3		UKB Neale v2	Duration of light diy	-0.0144657	0.00678178	0.0329236	179548
1:155133406:T:G	rs4971066	THBS3.8982.65.3		UKB Neale v2	3mm weak meridian (left)	-0.0220465	0.0102916	0.0321812	75398
1:155133406:T:G	rs4971066	THBS3.8982.65.3		UKB SAIGE	Chronic thyroiditis	-0.362	0.129002	0.00515	391652	223
1:155133406:T:G	rs4971066	THBS3.8982.65.3		UKB Neale v2	Alzheimer's disease/dementia | illnesses of adopted mother	0.459117	0.114573	6.29846e-05	2935	281
1:155133406:T:G	rs4971066	THBS3.8982.65.3		UKB Neale v2	Ever taken cannabis	0.0156259	0.00513257	0.0023315	117911
1:155133406:T:G	rs4971066	THBS3.8982.65.3		UKB Neale v2	Dentures | mouth/teeth dental problems	0.026525	0.00816327	0.00115672	359841	60977
1:155133406:T:G	rs4971066	THBS3.8982.65.3		UKB Neale v2	Leisure/social activities: Sports club or gym	-0.0170816	0.0069512	0.0139944	360063	108473
1:155133406:T:G	rs4971066	THBS3.8982.65.3		UKB Neale v2	Basal metabolic rate	-13.3064	2.69111	7.63439e-07	354825
1:155133406:T:G	rs4971066	THBS3.8982.65.3		UKB Neale v2	Nicotine product | treatment/medication code	0.377576	0.160093	0.0183488	361141	144
1:155133406:T:G	rs4971066	THBS3.8982.65.3		UKB Neale v2	Leg fat mass (left)	-0.0127402	0.00490339	0.00937045	354788
1:155133406:T:G	rs4971066	THBS3.8982.65.3		UKB Neale v2	Schizophrenia | non-cancer illness code, self-reported	0.244132	0.0971662	0.0119864	361141	391
1:155133406:T:G	rs4971066	THBS3.8982.65.3		UKB Neale v2	Tinnitus severity/nuisance	-0.0881351	0.0422361	0.0369204	34018
1:155133406:T:G	rs4971066	THBS3.8982.65.3		UKB SAIGE	Myocardial infarction	-0.0389	0.0188003	0.0386	388806	11703
1:155133406:T:G	rs4971066	THBS3.8982.65.3		UKB Neale v2	Number in household	-0.00497008	0.00212001	0.01906	358963
1:155133406:T:G	rs4971066	THBS3.8982.65.3		UKB SAIGE	Other hereditary hemolytic anemias	-0.576	0.212004	0.00674	390109	83
1:155133406:T:G	rs4971066	THBS3.8982.65.3		UKB SAIGE	Chronic bronchitis	0.0762	0.0361007	0.0348	378439	2934
1:155133406:T:G	rs4971066	THBS3.8982.65.3		UKB SAIGE	Neoplasm of uncertain behavior of breast	0.427	0.179003	0.0174	388664	115
1:155133406:T:G	rs4971066	THBS3.8982.65.3		UKB SAIGE	Iatrogenic endocrine disorders	0.328	0.167003	0.0494	405519	133
1:155133406:T:G	rs4971066	THBS3.8982.65.3		UKB Neale v2	Arm fat mass (right)	-0.00561203	0.00197461	0.00448199	354736
1:155133406:T:G	rs4971066	THBS3.8982.65.3		UKB Neale v2	Water intake	0.00683288	0.00278785	0.0142484	333363
1:155133406:T:G	rs4971066	THBS3.8982.65.3		UKB Neale v2	Rabeprazole sodium | treatment/medication code	-0.165737	0.0744131	0.025927	361141	667
1:155133406:T:G	rs4971066	THBS3.8982.65.3		UKB Neale v2	Use a helpline / voluntary organization | actions taken following self-harm	0.227417	0.0865645	0.00861065	117733	491
1:155133406:T:G	rs4971066	THBS3.8982.65.3		UKB Neale v2	Arm predicted mass (left)	-0.00596908	0.00142343	2.74798e-05	354653
1:155133406:T:G	rs4971066	THBS3.8982.65.3		UKB Neale v2	Often | workplace had a lot of diesel exhaust	0.078579	0.0324381	0.015417	89104	3483
1:155133406:T:G	rs4971066	THBS3.8982.65.3		UKB Neale v2	Heel bone mineral density (bmd) (left)	-0.00257577	0.000761575	0.000719428	114561
1:155133406:T:G	rs4971066	THBS3.8982.65.3		UKB Neale v2	Zimovane ls 3.75mg tablet | treatment/medication code	-0.36826	0.166579	0.0270521	361141	133
1:155133406:T:G	rs4971066	THBS3.8982.65.3		UKB SAIGE	Traumatic and surgical subcutaneous emphysema	0.606	0.225004	0.00705	408544	74
1:155133406:T:G	rs4971066	THBS3.8982.65.3		UKB Neale v2	Other type of milk | type milk consumed	-0.31891	0.127056	0.0120747	51427	232
1:155133406:T:G	rs4971066	THBS3.8982.65.3		UKB Neale v2	Heart disease | illnesses of father	-0.0177655	0.00723003	0.0140017	318570	104110
1:155133406:T:G	rs4971066	THBS3.8982.65.3		UKB Neale v2	Schizophrenia | mental health problems ever diagnosed by a professional	0.401203	0.188841	0.0336233	117706	103
1:155133406:T:G	rs4971066	THBS3.8982.65.3		UKB Neale v2	Nitrogen dioxide air pollution; 2010	-0.0498957	0.0234221	0.0331492	356078
1:155133406:T:G	rs4971066	THBS3.8982.65.3		UKB Neale v2	Leg predicted mass (right)	-0.0198969	0.00363239	4.31367e-08	354798
1:155133406:T:G	rs4971066	THBS3.8982.65.3		UKB Neale v2	Irregular heart beat | non-cancer illness code, self-reported	-0.21233	0.0808484	0.00863183	361141	565
1:155133406:T:G	rs4971066	THBS3.8982.65.3		UKB SAIGE	Pericarditis	-0.151	0.054101	0.00534	407052	1273
1:155133406:T:G	rs4971066	THBS3.8982.65.3		UKB SAIGE	Other disorders of metabolism	0.115	0.0512009	0.0246	408961	1424
1:155133406:T:G	rs4971066	THBS3.8982.65.3		UKB Neale v2	Heel bone mineral density (bmd) (right)	-0.00224029	0.000750044	0.00281896	114552
1:155133406:T:G	rs4971066	THBS3.8982.65.3		UKB Neale v2	Impedance of arm (right)	0.380171	0.122375	0.00189253	354792
1:155133406:T:G	rs4971066	THBS3.8982.65.3		UKB Neale v2	Fed-up feelings	0.0189639	0.00651664	0.00361301	353764	143332
1:155133406:T:G	rs4971066	THBS3.8982.65.3		UKB SAIGE	Fracture of radius and ulna	0.0741	0.0271005	0.00621	393011	5246
1:155133406:T:G	rs4971066	THBS3.8982.65.3		UKB SAIGE	Aneurysm of iliac artery	-0.517	0.195004	0.00801	400693	98
1:155133406:T:G	rs4971066	THBS3.8982.65.3		UKB Neale v2	Migraine | non-cancer illness code, self-reported	0.0428493	0.0188128	0.0227441	361141	10647
1:155133406:T:G	rs4971066	THBS3.8982.65.3		UKB Neale v2	Loperamide | treatment/medication code	-0.157943	0.0554565	0.00439845	361141	1203
1:155133406:T:G	rs4971066	THBS3.8982.65.3		UKB Neale v2	Left eye | which eye(s) affected by presbyopia	0.127701	0.0471527	0.00676689	31494	1750
1:155133406:T:G	rs4971066	THBS3.8982.65.3		UKB Neale v2	See own gp | actions taken following self-harm	0.133982	0.054433	0.0138389	117733	1249
1:155133406:T:G	rs4971066	THBS3.8982.65.3		UKB Neale v2	Eczema/dermatitis | non-cancer illness code, self-reported	-0.0517247	0.0201461	0.010243	361141	9321
1:155133406:T:G	rs4971066	THBS3.8982.65.3		UKB Neale v2	Right | usual side of head for mobile phone use	0.0163757	0.0070603	0.0203713	303009	127654
1:155133406:T:G	rs4971066	THBS3.8982.65.3		UKB SAIGE	Cellulitis and abscess of leg, except foot	0.0607	0.0261005	0.02	403182	5547
1:155133406:T:G	rs4971066	THBS3.8982.65.3		UKB SAIGE	Obstructive chronic bronchitis	0.0794	0.0376007	0.0348	378203	2698
1:155133406:T:G	rs4971066	THBS3.8982.65.3		UKB Neale v2	Carbocisteine | treatment/medication code	0.352136	0.138275	0.0108759	361141	193
1:155133406:T:G	rs4971066	THBS3.8982.65.3		UKB SAIGE	Posttraumatic stress disorder	0.541	0.182003	0.00296	365589	113
1:155133406:T:G	rs4971066	THBS3.8982.65.3		UKB Neale v2	Metoclopramide | treatment/medication code	-0.232742	0.0915157	0.0109838	361141	441
1:155133406:T:G	rs4971066	THBS3.8982.65.3		UKB Neale v2	Difficulty concentrating during worst period of anxiety	0.0673577	0.0236904	0.00446735	34879	8479
1:155133406:T:G	rs4971066	THBS3.8982.65.3		UKB SAIGE	Other nondiabetic retinopathy	-0.327	0.151003	0.0307	397020	161
1:155133406:T:G	rs4971066	THBS3.8982.65.3		UKB SAIGE	Acquired foot deformities	0.05	0.0200004	0.0126	404779	9865
1:155133406:T:G	rs4971066	THBS3.8982.65.3		UKB Neale v2	Emphysema/chronic bronchitis | blood clot, dvt, bronchitis, emphysema, asthma, rhinitis, eczema, allergy diagnosed by doctor	0.0687275	0.0246728	0.00534309	360527	6138
1:155133406:T:G	rs4971066	THBS3.8982.65.3		UKB Neale v2	Diabetes | illnesses of father	-0.0249566	0.011421	0.0288757	313294	30010
1:155133406:T:G	rs4971066	THBS3.8982.65.3		UKB SAIGE	Atrophy of edentulous alveolar ridge	0.591	0.226004	0.00881	398209	73
1:155133406:T:G	rs4971066	THBS3.8982.65.3		UKB SAIGE	Flatulence	0.1	0.0470009	0.0332	336472	1689
1:155133406:T:G	rs4971066	THBS3.8982.65.3		UKB SAIGE	Viral pneumonia	0.47	0.228004	0.0388	398609	71
1:155133406:T:G	rs4971066	THBS3.8982.65.3	PMID:27863252	Astle WJ	Hematocrit	0.0289583	0.00480904	1.727e-09	173039
1:155133406:T:G	rs4971066	THBS3.8982.65.3		UKB Neale v2	Arm fat-free mass (right)	-0.00583851	0.00140586	3.28265e-05	354732
1:155133406:T:G	rs4971066	THBS3.8982.65.3		UKB Neale v2	None of the above (group 1) | illnesses of adopted mother	-0.149857	0.0709245	0.0346907	2953	1320
1:155133406:T:G	rs4971066	THBS3.8982.65.3		UKB Neale v2	Ever had same-sex intercourse	0.0405434	0.0184509	0.0279914	326849	11109
1:155133406:T:G	rs4971066	THBS3.8982.65.3	PMID:28067908	de Lange KM	Inflammatory bowel disease	0.0417	0.017	0.01415	59957	25042
1:155133406:T:G	rs4971066	THBS3.8982.65.3		UKB Neale v2	Trunk fat mass	-0.0445159	0.0165352	0.00709876	354597
1:155133406:T:G	rs4971066	THBS3.8982.65.3		UKB Neale v2	Sodium warfarin | treatment/medication code	-0.231041	0.108397	0.0330516	361141	314
1:155133406:T:G	rs4971066	THBS3.8982.65.3		UKB SAIGE	Crushing or internal injury to organs	0.221	0.0608011	0.000282	408961	1007
1:155133406:T:G	rs4971066	THBS3.8982.65.3		UKB Neale v2	Tense / 'highly strung'	0.0193677	0.00856158	0.0236851	350159	60513
1:155133406:T:G	rs4971066	THBS3.8982.65.3		UKB Neale v2	Past tobacco smoking	-0.011069	0.00411592	0.00716028	332141
1:155133406:T:G	rs4971066	THBS3.8982.65.3		UKB SAIGE	Circumscribed scleroderma	-0.521	0.246005	0.0343	403936	61
1:155133406:T:G	rs4971066	THBS3.8982.65.3	PMID:28067908	de Lange KM	Crohn's disease	0.0602	0.022	0.006095	40266	12194
1:155133406:T:G	rs4971066	THBS3.8982.65.3		UKB Neale v2	Pancreatitis | non-cancer illness code, self-reported	0.163832	0.0689724	0.0175321	361141	777
1:155133406:T:G	rs4971066	THBS3.8982.65.3		UKB SAIGE	Other cerebral degenerations	-0.148	0.0579011	0.0108	396321	1112
1:155133406:T:G	rs4971066	THBS3.8982.65.3		UKB Neale v2	Arm predicted mass (right)	-0.00558922	0.00132489	2.4587e-05	354726
1:155133406:T:G	rs4971066	THBS3.8982.65.3		UKB Neale v2	Heart disease | illnesses of siblings	-0.0265327	0.0115167	0.0212296	280784	28696
1:155133406:T:G	rs4971066	THBS3.8982.65.3		UKB SAIGE	Congenital anomalies of genital organs	0.186	0.0713013	0.0091	407462	732
1:155133406:T:G	rs4971066	THBS3.8982.65.3		UKB Neale v2	Relative age of first facial hair	-0.00415995	0.00208378	0.0458978	161470
1:155133406:T:G	rs4971066	THBS3.8982.65.3	PMID:29292387	Turley P	Neuroticism	0.005	0.003	0.0481	168105
1:155133406:T:G	rs4971066	THBS3.8982.65.3	PMID:20453842	Stahl EA	Rheumatoid arthritis	0.239017	0.109756	0.0294249	25708	5539
1:155133406:T:G	rs4971066	THBS3.8982.65.3	PMID:29343764	Jiang X	Vitamin D levels	-0.0124	0.0063	0.04868	79366
1:155133406:T:G	rs4971066	THBS3.8982.65.3		UKB Neale v2	Index of best refractometry result (left)	0.0120587	0.00566939	0.0334245	77739
1:155133406:T:G	rs4971066	THBS3.8982.65.3		UKB SAIGE	Other disorders of biliary tract	-0.122	0.0600011	0.0418	392347	1040
1:155133406:T:G	rs4971066	THBS3.8982.65.3		UKB Neale v2	Loneliness, isolation	0.0280827	0.0083688	0.000791701	355583	63508
1:155133406:T:G	rs4971066	THBS3.8982.65.3		UKB Neale v2	Other serious eye condition | eye problems/disorders	0.0709934	0.02435	0.00355077	117890	6587
1:155133406:T:G	rs4971066	THBS3.8982.65.3		UKB Neale v2	Severity of manic/irritable episodes	0.10618	0.0298828	0.000381272	20984	5768
1:155133406:T:G	rs4971066	THBS3.8982.65.3		UKB Neale v2	Heel quantitative ultrasound index (qui), direct entry (left)	-0.419399	0.121069	0.00053212	114630
1:155133406:T:G	rs4971066	THBS3.8982.65.3	PMID:30271922	Clifton EAD	Self-reported risk-taking behaviour	0.00245	0.00124	0.049	436236	113882
1:155133406:T:G	rs4971066	THBS3.8982.65.3	PMID:26192919	Liu JZ	Crohn's disease [EA]	0.033961	0.0172885	0.0494867	20883	5956
1:155133406:T:G	rs4971066	THBS3.8982.65.3		UKB Neale v2	3mm cylindrical power angle (right)	-0.903907	0.452338	0.0456875	75401
1:155133406:T:G	rs4971066	THBS3.8982.65.3		UKB Neale v2	Light brown | hair colour (natural, before greying)	0.0159091	0.00649578	0.0143186	360270	147560
1:155133406:T:G	rs4971066	THBS3.8982.65.3		UKB Neale v2	Happiness	0.0088105	0.00388996	0.0235186	119535
1:155133406:T:G	rs4971066	THBS3.8982.65.3		UKB SAIGE	Unspecified osteomyelitis	0.227	0.0960018	0.0181	366220	401
1:155133406:T:G	rs4971066	THBS3.8982.65.3		UKB Neale v2	Haemoglobin concentration	0.0191898	0.0031634	1.31104e-09	350474
1:155133406:T:G	rs4971066	THBS3.8982.65.3		UKB SAIGE	Hypothyroidism nos	-0.0358	0.0172003	0.037	405600	14171
1:155133406:T:G	rs4971066	THBS3.8982.65.3		UKB Neale v2	Previous | smoking status	0.0212928	0.00659191	0.00123712	359706	127550
1:155133406:T:G	rs4971066	THBS3.8982.65.3		UKB Neale v2	Trunk predicted mass	-0.0467864	0.00994007	2.51673e-06	354494
1:155133406:T:G	rs4971066	THBS3.8982.65.3		UKB Neale v2	I was more talkative than usual | manic/hyper symptoms	-0.0839423	0.0306438	0.00616073	24049	5027
1:155133406:T:G	rs4971066	THBS3.8982.65.3		UKB SAIGE	Other headache syndromes	-0.0457	0.0220004	0.0383	406671	7891
1:155133406:T:G	rs4971066	THBS3.8982.65.3		UKB Neale v2	Fracture resulting from simple fall	-0.0396852	0.019952	0.0467016	34310	13926
1:155133406:T:G	rs4971066	THBS3.8982.65.3		UKB Neale v2	Difficulty stopping worrying during worst period of anxiety	0.122848	0.0433423	0.00459359	35523	2057
1:155133406:T:G	rs4971066	THBS3.8982.65.3		UKB Neale v2	Impedance of leg (left)	0.594517	0.10358	9.49159e-09	354811
1:155133406:T:G	rs4971066	THBS3.8982.65.3		UKB Neale v2	Receive help from friends / family / neighbours | actions taken following self-harm	0.12778	0.0504885	0.0113776	117733	1453
1:155133406:T:G	rs4971066	THBS3.8982.65.3		UKB SAIGE	Heart valve replaced	-0.101	0.0500009	0.0444	403920	1499
1:155133406:T:G	rs4971066	THBS3.8982.65.3		UKB Neale v2	Home location - north co-ordinate (rounded)	-1123.59	416.923	0.00704015	361187
1:155133406:T:G	rs4971066	THBS3.8982.65.3		UKB Neale v2	Tea intake	-0.020016	0.0093654	0.0325803	349376
1:155133406:T:G	rs4971066	THBS3.8982.65.3		UKB SAIGE	Chronic ulcer of skin	0.105	0.0432008	0.0151	408961	1988
1:155133406:T:G	rs4971066	THBS3.8982.65.3		UKB SAIGE	Other disorders of circulatory system	-0.0316	0.0156003	0.0429	404449	16544
1:155133406:T:G	rs4971066	THBS3.8982.65.3	PMID:27863252	Astle WJ	Plateletcrit	0.020047	0.00497914	5.669e-05	164339
1:155133406:T:G	rs4971066	THBS3.8982.65.3		UKB Neale v2	Number of depression episodes	0.0161849	0.00784852	0.0391982	45695
1:155133406:T:G	rs4971066	THBS3.8982.65.3		UKB Neale v2	6mm weak meridian (right)	-0.0287432	0.0110823	0.00949938	66256
1:155133406:T:G	rs4971066	THBS3.8982.65.3		UKB Neale v2	Gout | non-cancer illness code, self-reported	-0.108234	0.026683	4.98562e-05	361141	5174
1:155133406:T:G	rs4971066	THBS3.8982.65.3		UKB Neale v2	Red blood cell (erythrocyte) count	0.00650961	0.00113121	8.69416e-09	350475
1:155133406:T:G	rs4971066	THBS3.8982.65.3		UKB Neale v2	Diazepam | treatment/medication code	-0.122594	0.0612196	0.0452252	361141	987
1:155133406:T:G	rs4971066	THBS3.8982.65.3		UKB Neale v2	Arm fat percentage (right)	-0.0532877	0.0239473	0.0260676	354760
1:155133406:T:G	rs4971066	THBS3.8982.65.3		UKB Neale v2	No, never | tinnitus	-0.026933	0.0123182	0.0287824	117882	34267
1:155133406:T:G	rs4971066	THBS3.8982.65.3		UKB Neale v2	Maternal smoking around birth	-0.0157884	0.00741939	0.033335	309942	95182
1:22735058:G:A	rs6687487	EPHB2.5077.28.3		UKB Neale v2	None of the above | manic/hyper symptoms	-0.0949239	0.0353187	0.00719993	24049	8672
1:22735058:G:A	rs6687487	EPHB2.5077.28.3		UKB Neale v2	Icd10: c64 malignant neoplasm of kidney, except renal pelvis | underlying (primary) cause of death	0.43947	0.20624	0.0331241	9092	178
1:22735058:G:A	rs6687487	EPHB2.5077.28.3		UKB Neale v2	Birth weight of first child	0.0113898	0.00528738	0.0312296	155202
1:22735058:G:A	rs6687487	EPHB2.5077.28.3		UKB SAIGE	Rash and other nonspecific skin eruption	0.116	0.0576011	0.0436	405564	2157
1:22735058:G:A	rs6687487	EPHB2.5077.28.3		UKB Neale v2	Number of self-reported non-cancer illnesses	-0.00765246	0.00355348	0.0312793	361141
1:22735058:G:A	rs6687487	EPHB2.5077.28.3		UKB Neale v2	Bowel / intestinal obstruction | non-cancer illness code, self-reported	0.536845	0.216029	0.0129519	361141	153
1:22735058:G:A	rs6687487	EPHB2.5077.28.3		UKB Neale v2	Rosiglitazone 1mg / metformin 500mg tablet | treatment/medication code	-0.533813	0.216723	0.0137725	361141	152
1:22735058:G:A	rs6687487	EPHB2.5077.28.3		UKB Neale v2	Penicillin | treatment/medication code	-0.363574	0.180999	0.0445653	361141	218
1:22735058:G:A	rs6687487	EPHB2.5077.28.3		UKB SAIGE	Skull and face fracture and other intercranial injury	0.105	0.0497009	0.0339	408511	2957
1:22735058:G:A	rs6687487	EPHB2.5077.28.3		UKB Neale v2	Pulse rate	0.196054	0.0884874	0.0267199	118850
1:22735058:G:A	rs6687487	EPHB2.5077.28.3		UKB Neale v2	Fracture foot | non-cancer illness code, self-reported	0.477684	0.172508	0.00562144	361141	240
1:22735058:G:A	rs6687487	EPHB2.5077.28.3		UKB SAIGE	Lupus (localized and systemic)	0.312	0.131002	0.0178	401783	418
1:22735058:G:A	rs6687487	EPHB2.5077.28.3		UKB SAIGE	Heart valve disorders	-0.0828	0.0416008	0.0463	406660	4239
1:22735058:G:A	rs6687487	EPHB2.5077.28.3		UKB Neale v2	Losartan potassium+hydrochlorothiazide 50mg/12.5mg tablet | treatment/medication code	-0.337207	0.154294	0.0288509	361141	300
1:22735058:G:A	rs6687487	EPHB2.5077.28.3		UKB SAIGE	Musculoskeletal symptoms referable to limbs	-0.103	0.0365007	0.00496	408961	5493
1:22735058:G:A	rs6687487	EPHB2.5077.28.3		UKB SAIGE	Simple and unspecified goiter	0.225	0.109002	0.0387	392031	602
1:22735058:G:A	rs6687487	EPHB2.5077.28.3		UKB SAIGE	Other open wound of head and face	0.102	0.0499009	0.0408	403345	2919
1:22735058:G:A	rs6687487	EPHB2.5077.28.3		UKB Neale v2	Elocon cream | treatment/medication code	-0.339021	0.172511	0.0493861	361141	240
1:22735058:G:A	rs6687487	EPHB2.5077.28.3	PMID:28887542	Prins BP	Aspartate aminotransferase levels	-0.01	0.01	0.0416999	9463
1:22735058:G:A	rs6687487	EPHB2.5077.28.3		UKB Neale v2	Stayed about the same or was on a diet | weight change during worst episode of depression	0.0729641	0.0219751	0.000899576	56571	22981
1:22735058:G:A	rs6687487	EPHB2.5077.28.3		UKB Neale v2	Forced expiratory volume in 1-second (fev1)	0.00614958	0.00266647	0.0210967	329404
1:22735058:G:A	rs6687487	EPHB2.5077.28.3		UKB Neale v2	Allergy/hypersensitivity/anaphylaxis | non-cancer illness code, self-reported	0.103824	0.052349	0.0473303	361141	2622
1:22735058:G:A	rs6687487	EPHB2.5077.28.3		UKB Neale v2	Salazopyrin 500mg tablet | treatment/medication code	0.354615	0.17508	0.0428194	361141	233
1:22735058:G:A	rs6687487	EPHB2.5077.28.3		UKB SAIGE	Congenital coagulation defects	-0.271	0.123002	0.0269	406754	473
1:22735058:G:A	rs6687487	EPHB2.5077.28.3		UKB Neale v2	Calcichew d3 tablet | treatment/medication code	0.124937	0.045663	0.00621698	361141	3423
1:22735058:G:A	rs6687487	EPHB2.5077.28.3		UKB SAIGE	Open wounds of head; neck; and trunk	0.0968	0.0435008	0.0263	404263	3837
1:22735058:G:A	rs6687487	EPHB2.5077.28.3		UKB SAIGE	Multiple myeloma	-0.269	0.114002	0.0181	405018	552
1:22735058:G:A	rs6687487	EPHB2.5077.28.3		UKB Neale v2	Telmisartan | treatment/medication code	-0.260718	0.110793	0.0186104	361141	582
1:22735058:G:A	rs6687487	EPHB2.5077.28.3		UKB Neale v2	Nitrazepam | treatment/medication code	-0.410385	0.177754	0.020957	361141	226
1:22735058:G:A	rs6687487	EPHB2.5077.28.3		UKB Neale v2	Peripheral neuropathy | non-cancer illness code, self-reported	0.314151	0.117233	0.00736759	361141	520
1:22735058:G:A	rs6687487	EPHB2.5077.28.3		UKB SAIGE	Impacted cerumen	-0.279	0.140003	0.0465	407873	363
1:22735058:G:A	rs6687487	EPHB2.5077.28.3		UKB Neale v2	Co-amilofruse | treatment/medication code	0.280015	0.141423	0.0477024	361141	357
1:22735058:G:A	rs6687487	EPHB2.5077.28.3		UKB Neale v2	Forced vital capacity (fvc)	0.00834086	0.00345767	0.0158539	329404
1:22735058:G:A	rs6687487	EPHB2.5077.28.3		UKB SAIGE	Disorders of parathyroid gland	-0.227	0.0908017	0.0122	406263	877
1:22735058:G:A	rs6687487	EPHB2.5077.28.3		UKB Neale v2	Diltiazem | treatment/medication code	0.22008	0.0983931	0.0253015	361141	738
1:22735058:G:A	rs6687487	EPHB2.5077.28.3		UKB Neale v2	Doctor diagnosed hayfever or allergic rhinitis	-0.042373	0.0209709	0.0433239	91787	20904
1:22735058:G:A	rs6687487	EPHB2.5077.28.3		UKB Neale v2	Diagnosed with life-threatening illness	0.0463415	0.0207998	0.0258813	117617	19291
1:22735058:G:A	rs6687487	EPHB2.5077.28.3		UKB Neale v2	Forced vital capacity (fvc), best measure	0.00712415	0.00350995	0.0423876	272338
1:22735058:G:A	rs6687487	EPHB2.5077.28.3		UKB Neale v2	Yes | job involved shift work	0.0409865	0.0194904	0.0354735	91149	25698
1:22735058:G:A	rs6687487	EPHB2.5077.28.3		UKB Neale v2	Jaundice (unknown cause) | non-cancer illness code, self-reported	0.49879	0.155343	0.00132302	361141	296
1:22735058:G:A	rs6687487	EPHB2.5077.28.3		UKB SAIGE	Thyrotoxicosis with or without goiter	-0.133	0.0625011	0.0336	393289	1860
1:22735058:G:A	rs6687487	EPHB2.5077.28.3		UKB Neale v2	Fed-up feelings	0.019729	0.00906098	0.0294518	353764	143332
1:22735058:G:A	rs6687487	EPHB2.5077.28.3		UKB Neale v2	Asthma | non-cancer illness code, self-reported	-0.031246	0.0138611	0.0241791	361141	41934
1:22735058:G:A	rs6687487	EPHB2.5077.28.3		UKB Neale v2	Recent worrying too much about different things	0.0120004	0.00520352	0.0211009	117567
1:22735058:G:A	rs6687487	EPHB2.5077.28.3		UKB Neale v2	Chest pain or discomfort when walking uphill or hurrying	-0.0544487	0.0277147	0.0494608	44867	11938
1:22735058:G:A	rs6687487	EPHB2.5077.28.3		UKB Neale v2	Budesonide | treatment/medication code	-0.226257	0.0969392	0.0195939	361141	761
1:22735058:G:A	rs6687487	EPHB2.5077.28.3		UKB Neale v2	Doctor diagnosed copd (chronic obstructive pulmonary disease)	-0.170823	0.0729153	0.0191412	91787	1357
1:22735058:G:A	rs6687487	EPHB2.5077.28.3		UKB Neale v2	Lecithin product | treatment/medication code	-0.445119	0.183098	0.0150545	361141	213
1:22735058:G:A	rs6687487	EPHB2.5077.28.3		UKB SAIGE	Hyperparathyroidism	-0.232	0.0961018	0.0159	406167	781
1:22735058:G:A	rs6687487	EPHB2.5077.28.3		UKB Neale v2	Basophill count	-0.00944054	0.00379814	0.0129349	349856
1:22735058:G:A	rs6687487	EPHB2.5077.28.3		UKB Neale v2	None of the above (group 1) | illnesses of father	0.0196128	0.00983783	0.0461917	314797	116736
1:22735058:G:A	rs6687487	EPHB2.5077.28.3		UKB SAIGE	Synoviopathy	-0.292	0.146003	0.0462	379045	334
1:22735058:G:A	rs6687487	EPHB2.5077.28.3		UKB SAIGE	Swelling of limb	-0.0912	0.0395007	0.021	408131	4663
1:22735058:G:A	rs6687487	EPHB2.5077.28.3		UKB Neale v2	Difficulty stopping worrying during worst period of anxiety	-0.180982	0.0603178	0.00269699	35523	2057
1:22735058:G:A	rs6687487	EPHB2.5077.28.3		UKB Neale v2	Atrovent 20micrograms inhaler | treatment/medication code	-0.296008	0.14047	0.0350914	361141	362
1:22735058:G:A	rs6687487	EPHB2.5077.28.3		UKB SAIGE	Peptic ulcer, site unspecified	-0.26	0.131002	0.0476	401950	425
1:22735058:G:A	rs6687487	EPHB2.5077.28.3		UKB Neale v2	Yes, during the last year | ever been injured or injured someone else through drinking alcohol	-0.283546	0.113685	0.0126261	118002	552
1:22735058:G:A	rs6687487	EPHB2.5077.28.3		UKB Neale v2	Heart valve problem/heart murmur | non-cancer illness code, self-reported	-0.146431	0.0541172	0.00681312	361141	2453
1:22735058:G:A	rs6687487	EPHB2.5077.28.3		UKB SAIGE	Osteoarthrosis, localized, primary	-0.0753	0.0289005	0.00928	389591	9069
1:22735058:G:A	rs6687487	EPHB2.5077.28.3		UKB SAIGE	Rosacea	0.331	0.152003	0.0297	402982	310
1:22735058:G:A	rs6687487	EPHB2.5077.28.3		UKB Neale v2	Mood swings	0.0183699	0.00895632	0.0402579	352604	158982
1:22735058:G:A	rs6687487	EPHB2.5077.28.3		UKB Neale v2	Zapain caplet | treatment/medication code	0.565614	0.23169	0.0146352	361141	133
1:22735058:G:A	rs6687487	EPHB2.5077.28.3		UKB Neale v2	Nitrogen dioxide air pollution; 2005	-0.0845831	0.0422017	0.0450429	356078
1:22735058:G:A	rs6687487	EPHB2.5077.28.3		UKB SAIGE	Cough	0.169	0.0503009	0.000768	402717	2884
1:22735058:G:A	rs6687487	EPHB2.5077.28.3		UKB SAIGE	Abnormal findings on study of brain and/or nervous system	-0.417	0.192004	0.0299	395402	193
1:22735058:G:A	rs6687487	EPHB2.5077.28.3		UKB Neale v2	Forced expiratory volume in 1-second (fev1), best measure	0.00653676	0.00287053	0.0227752	272338
1:22735058:G:A	rs6687487	EPHB2.5077.28.3		UKB Neale v2	Neuroticism score	0.0432527	0.0157974	0.00618244	293006
1:22735058:G:A	rs6687487	EPHB2.5077.28.3		UKB SAIGE	Sexual and gender identity disorders	0.432	0.149003	0.00378	365798	322
1:22735058:G:A	rs6687487	EPHB2.5077.28.3		UKB Neale v2	Ezetrol 10mg tablet | treatment/medication code	-0.256891	0.103659	0.0132026	361141	665
1:22735058:G:A	rs6687487	EPHB2.5077.28.3		UKB SAIGE	Splenomegaly	0.289	0.129002	0.0257	385583	426
1:22735058:G:A	rs6687487	EPHB2.5077.28.3		UKB Neale v2	Furosemide | treatment/medication code	0.110403	0.0513738	0.0316306	361141	2714
1:22735058:G:A	rs6687487	EPHB2.5077.28.3		UKB Neale v2	Salbutamol | treatment/medication code	-0.0845496	0.0409486	0.0389414	361141	4305
1:22735058:G:A	rs6687487	EPHB2.5077.28.3	PMID:28887542	Prins BP	Dehydroepiandrosterone sulphate levels	-0.03	0.02	0.0359663	9722
1:22735058:G:A	rs6687487	EPHB2.5077.28.3		UKB SAIGE	Systemic lupus erythematosus	0.451	0.146003	0.00203	401707	342
1:22735058:G:A	rs6687487	EPHB2.5077.28.3		UKB SAIGE	Mitral valve disease	-0.116	0.0493009	0.0182	405406	2985
1:22735058:G:A	rs6687487	EPHB2.5077.28.3		UKB Neale v2	Cellulitis | non-cancer illness code, self-reported	0.350777	0.175453	0.0455766	361141	232
1:22735058:G:A	rs6687487	EPHB2.5077.28.3		UKB SAIGE	Open-angle glaucoma	0.194	0.0831015	0.0193	398804	1043
1:22735058:G:A	rs6687487	EPHB2.5077.28.3		UKB SAIGE	Keratitis	-0.356	0.155003	0.022	399603	297
1:22735058:G:A	rs6687487	EPHB2.5077.28.3		UKB Neale v2	Heel bone mineral density (bmd) t-score, automated (right)	-0.0186254	0.00928581	0.0448809	114614
1:22735058:G:A	rs6687487	EPHB2.5077.28.3	PMID:28887542	Prins BP	Alanine transaminase levels	-0.01	0	0.0133155	9731
1:22735058:G:A	rs6687487	EPHB2.5077.28.3		UKB Neale v2	Chronic fatigue syndrome | non-cancer illness code, self-reported	0.214596	0.065716	0.00109258	361141	1659
1:22735058:G:A	rs6687487	EPHB2.5077.28.3		UKB SAIGE	Carbuncle and furuncle	0.153	0.056001	0.0062	399937	2302
1:22735058:G:A	rs6687487	EPHB2.5077.28.3		UKB SAIGE	Sialoadenitis	0.369	0.140003	0.0086	403689	366
1:22735058:G:A	rs6687487	EPHB2.5077.28.3		UKB Neale v2	Feelings of worthlessness during worst period of depression	-0.044957	0.0209381	0.0317831	62128	30535
1:22735058:G:A	rs6687487	EPHB2.5077.28.3		UKB Neale v2	Cholesterol lowering medication | medication for cholesterol, blood pressure, diabetes, or take exogenous hormones	0.0462042	0.0177979	0.00942993	193148	24247
1:22735058:G:A	rs6687487	EPHB2.5077.28.3		UKB SAIGE	Intestinal obstruction without mention of hernia	-0.0967	0.0424008	0.0227	338777	3994
1:22735058:G:A	rs6687487	EPHB2.5077.28.3		UKB Neale v2	Hand grip strength (left)	0.0701021	0.0335907	0.0368936	359704
1:22735058:G:A	rs6687487	EPHB2.5077.28.3		UKB Neale v2	Snoring	0.0183533	0.0093102	0.0486855	336320	125656
1:22735058:G:A	rs6687487	EPHB2.5077.28.3		UKB SAIGE	Substance addiction and disorders	-0.299	0.135002	0.027	379747	392
1:22735058:G:A	rs6687487	EPHB2.5077.28.3		UKB SAIGE	Degenerative disease of the spinal cord	0.125	0.0632012	0.0486	396998	1789
1:22735058:G:A	rs6687487	EPHB2.5077.28.3		UKB SAIGE	Pallor and flushing	-0.467	0.203004	0.0211	407320	175
1:22735058:G:A	rs6687487	EPHB2.5077.28.3		UKB SAIGE	Open wound or laceration of eye or eyelid	0.333	0.162003	0.0396	400699	273
1:22735058:G:A	rs6687487	EPHB2.5077.28.3		UKB Neale v2	Worry too long after embarrassment	0.0231344	0.00898967	0.0100684	346527	165310
1:22735058:G:A	rs6687487	EPHB2.5077.28.3		UKB SAIGE	Corns and callosities	0.351	0.156003	0.0242	404168	293
1:22735058:G:A	rs6687487	EPHB2.5077.28.3		UKB Neale v2	Restaurant meals | type of meals eaten	0.0669159	0.0325686	0.0399174	51427	7829
1:22735058:G:A	rs6687487	EPHB2.5077.28.3		UKB Neale v2	Ongoing addiction to alcohol	-0.291076	0.107584	0.00686043	2739	1184
1:22735058:G:A	rs6687487	EPHB2.5077.28.3		UKB SAIGE	Pulmonary collapse; interstitial and compensatory emphysema	0.124	0.0598011	0.0388	399416	2005
1:22735058:G:A	rs6687487	EPHB2.5077.28.3		UKB Neale v2	Recent easy annoyance or irritability	0.0116086	0.00453368	0.0104527	117483
1:22735058:G:A	rs6687487	EPHB2.5077.28.3		UKB SAIGE	Other dyspnea	-0.218	0.0890016	0.0142	400745	912
1:22735058:G:A	rs6687487	EPHB2.5077.28.3		UKB Neale v2	Adizem-xl plus m/r capsule | treatment/medication code	0.38641	0.165398	0.0194763	361141	261
1:22735058:G:A	rs6687487	EPHB2.5077.28.3		UKB Neale v2	Lost weight | weight change during worst episode of depression	-0.0497156	0.022944	0.0302497	56571	20313
1:22735058:G:A	rs6687487	EPHB2.5077.28.3		UKB SAIGE	Acute pericarditis	0.507	0.181003	0.00517	405999	220
1:22735058:G:A	rs6687487	EPHB2.5077.28.3		UKB Neale v2	Both eyes | ever had refractive laser eye surgery	0.177373	0.0830281	0.0326947	5719	1258
1:22735058:G:A	rs6687487	EPHB2.5077.28.3	PMID:29531354	Malik R	Ischemic stroke	0.0358	0.0183	0.05	440328	34217
1:22735058:G:A	rs6687487	EPHB2.5077.28.3		UKB SAIGE	Paralytic strabismus	0.363	0.161003	0.0238	401522	277
1:22735058:G:A	rs6687487	EPHB2.5077.28.3		UKB Neale v2	Seen a psychiatrist for nerves, anxiety, tension or depression	0.0309696	0.0139707	0.0266367	359535	41233
1:22735058:G:A	rs6687487	EPHB2.5077.28.3		UKB Neale v2	Heart attack/myocardial infarction | non-cancer illness code, self-reported	0.0894797	0.0293932	0.00233247	361141	8239
1:22735058:G:A	rs6687487	EPHB2.5077.28.3		UKB Neale v2	Psychological/psychiatric problem | non-cancer illness code, self-reported	0.355983	0.140286	0.0111623	361141	363
1:22735058:G:A	rs6687487	EPHB2.5077.28.3		UKB Neale v2	Knee pain | pain type(s) experienced in last month	-0.0254244	0.0108442	0.01905	360391	76628
1:22735058:G:A	rs6687487	EPHB2.5077.28.3		UKB Neale v2	Frequency of consuming six or more units of alcohol	-0.0181634	0.00911438	0.0462827	108485
1:22735058:G:A	rs6687487	EPHB2.5077.28.3		UKB Neale v2	Evening primrose oil | treatment/medication code	0.0750796	0.0353631	0.0337427	361141	5730
1:22735058:G:A	rs6687487	EPHB2.5077.28.3		UKB Neale v2	Doctor diagnosed sarcoidosis	-0.37108	0.134899	0.0059452	91787	395
1:22735058:G:A	rs6687487	EPHB2.5077.28.3		UKB Neale v2	Epanutin 25mg capsule | treatment/medication code	-0.348645	0.162948	0.0323833	361141	269
1:22735058:G:A	rs6687487	EPHB2.5077.28.3		UKB Neale v2	Chronic bronchitis/emphysema | illnesses of adopted father	0.264285	0.130481	0.042922	2622	453
1:22735058:G:A	rs6687487	EPHB2.5077.28.3		UKB SAIGE	Primary open angle glaucoma	0.194	0.0833015	0.0196	398798	1037
1:22735058:G:A	rs6687487	EPHB2.5077.28.3		UKB Neale v2	Recent feelings of foreboding	0.00951144	0.00427691	0.0261569	117474
1:22735058:G:A	rs6687487	EPHB2.5077.28.3		UKB SAIGE	Difficulty in walking	-0.537	0.214004	0.012	402789	156
1:22735058:G:A	rs6687487	EPHB2.5077.28.3		UKB SAIGE	Aneurysm of other specified artery	0.486	0.189003	0.0102	400795	200
1:22735058:G:A	rs6687487	EPHB2.5077.28.3	PMID:29531354	Malik R	Stroke	0.0376	0.0167	0.02477	446696	40585
1:22735058:G:A	rs6687487	EPHB2.5077.28.3		UKB Neale v2	Zinc | mineral and other dietary supplements	0.0488458	0.0227044	0.0314435	360016	14402
1:22735058:G:A	rs6687487	EPHB2.5077.28.3		UKB SAIGE	Diabetic retinopathy	0.183	0.0733013	0.0123	398198	1339
1:22735058:G:A	rs6687487	EPHB2.5077.28.3		UKB SAIGE	Second degree av block	-0.299	0.126002	0.0174	381372	453
1:22735058:G:A	rs6687487	EPHB2.5077.28.3		UKB Neale v2	Amount of alcohol drunk on a typical drinking day	-0.0170602	0.00814128	0.036127	108256
1:22735058:G:A	rs6687487	EPHB2.5077.28.3		UKB SAIGE	Corneal ulcer	-0.471	0.225004	0.0366	399447	141
1:22735058:G:A	rs6687487	EPHB2.5077.28.3	PMID:29942086	Savage JE	Intelligence	-0.0109536	0.00497213	0.0276	269867
1:22735058:G:A	rs6687487	EPHB2.5077.28.3		UKB Neale v2	Red | hair colour (natural, before greying)	-0.0417405	0.0211797	0.0487454	360270	16615
1:22735058:G:A	rs6687487	EPHB2.5077.28.3		UKB SAIGE	Type 1 diabetes with renal manifestations	0.605	0.306006	0.0484	388832	76
1:22735058:G:A	rs6687487	EPHB2.5077.28.3		UKB Neale v2	Heart attack | vascular/heart problems diagnosed by doctor	0.081249	0.0293097	0.00556921	360420	8288
1:22735058:G:A	rs6687487	EPHB2.5077.28.3		UKB Neale v2	High blood pressure | illnesses of siblings	0.0410405	0.012167	0.000743187	281619	58495
1:22735058:G:A	rs6687487	EPHB2.5077.28.3		UKB Neale v2	Hypothyroidism/myxoedema | non-cancer illness code, self-reported	-0.0444786	0.0204039	0.0292623	361141	17574
1:22735058:G:A	rs6687487	EPHB2.5077.28.3		UKB SAIGE	Allergic reaction to food	-0.462	0.197004	0.0192	405001	184
1:22735058:G:A	rs6687487	EPHB2.5077.28.3		UKB Neale v2	Headaches for 3+ months	-0.0613132	0.0201214	0.00231062	70181	32075
1:22735058:G:A	rs6687487	EPHB2.5077.28.3		UKB SAIGE	Other infectious and parasitic diseases	0.45	0.187003	0.0161	408634	205
1:22735058:G:A	rs6687487	EPHB2.5077.28.3		UKB SAIGE	Other endocrine disorders	-0.492	0.192004	0.0106	405581	195
1:22735058:G:A	rs6687487	EPHB2.5077.28.3	PMID:29531354	Malik R	Ischemic stroke (cardioembolic)	0.0879	0.0348	0.01164	413304	7193
1:22735058:G:A	rs6687487	EPHB2.5077.28.3		UKB SAIGE	Other intestinal obstruction	-0.111	0.0463009	0.017	338129	3346
1:22735058:G:A	rs6687487	EPHB2.5077.28.3		UKB SAIGE	Pericarditis	0.156	0.0751014	0.0373	407052	1273
1:22735058:G:A	rs6687487	EPHB2.5077.28.3		UKB Neale v2	Subset inclusion logic | fi13	-0.296205	0.116689	0.0111854	2964	647
1:22735058:G:A	rs6687487	EPHB2.5077.28.3		UKB Neale v2	Ever addicted to any substance or behaviour	-0.0755322	0.0327232	0.0209866	116746	7023
1:22735058:G:A	rs6687487	EPHB2.5077.28.3		UKB Neale v2	Acute infective polyneuritis/guillain-barre syndrome | non-cancer illness code, self-reported	0.410647	0.20495	0.0451042	361141	170
1:22735058:G:A	rs6687487	EPHB2.5077.28.3		UKB Neale v2	Penicillin v | treatment/medication code	-0.408857	0.198637	0.0395566	361141	181
1:22735058:G:A	rs6687487	EPHB2.5077.28.3		UKB Neale v2	Icd10: c56 malignant neoplasm of ovary | underlying (primary) cause of death	-0.417003	0.180026	0.0205592	9092	226
1:22735058:G:A	rs6687487	EPHB2.5077.28.3		UKB Neale v2	Hydroxychloroquine | treatment/medication code	0.239406	0.117557	0.0416949	361141	517
1:22735058:G:A	rs6687487	EPHB2.5077.28.3		UKB Neale v2	Macular degeneration | eye problems/disorders	-0.121562	0.0515474	0.0183605	117890	2726
1:22735058:G:A	rs6687487	EPHB2.5077.28.3		UKB SAIGE	Herpes zoster with nervous system complications	-0.711	0.275005	0.00971	403412	96
1:22735058:G:A	rs6687487	EPHB2.5077.28.3		UKB Neale v2	Gestational diabetes only	0.235837	0.10104	0.0196206	6119	691
1:22735058:G:A	rs6687487	EPHB2.5077.28.3		UKB SAIGE	Erythematous conditions	0.133	0.054401	0.0147	405092	2420
1:22735058:G:A	rs6687487	EPHB2.5077.28.3		UKB Neale v2	Rhinocort 50micrograms nasal spray | treatment/medication code	0.558725	0.211262	0.00817553	361141	160
1:22735058:G:A	rs6687487	EPHB2.5077.28.3		UKB Neale v2	Often | worked with materials containing asbestos	0.159699	0.0716344	0.0257888	76457	1262
1:22735058:G:A	rs6687487	EPHB2.5077.28.3		UKB SAIGE	Diseases of the salivary glands	0.32	0.101002	0.00151	404033	710
1:22735058:G:A	rs6687487	EPHB2.5077.28.3		UKB SAIGE	Arrhythmia (cardiac) nos	-0.195	0.0882016	0.0271	381841	922
1:22735058:G:A	rs6687487	EPHB2.5077.28.3		UKB Neale v2	Asthma | blood clot, dvt, bronchitis, emphysema, asthma, rhinitis, eczema, allergy diagnosed by doctor	-0.0275087	0.0139043	0.0478762	360527	41633
1:22735058:G:A	rs6687487	EPHB2.5077.28.3		UKB Neale v2	Buprenorphine | treatment/medication code	0.342189	0.172508	0.0472966	361141	240
1:22735058:G:A	rs6687487	EPHB2.5077.28.3		UKB Neale v2	Heel quantitative ultrasound index (qui), direct entry (right)	-0.329887	0.16448	0.0448983	114614
1:22735058:G:A	rs6687487	EPHB2.5077.28.3		UKB Neale v2	Nitrogen dioxide air pollution; 2006	-0.0775125	0.0385386	0.0442951	356078
1:22735058:G:A	rs6687487	EPHB2.5077.28.3		UKB SAIGE	Chronic tonsillitis and adenoiditis	-0.221	0.0801015	0.00582	391171	1126
1:22735058:G:A	rs6687487	EPHB2.5077.28.3	PMID:30053915	Scepanovic P	Anti-varicella zoster virus IgG levels	-0.0398583	0.017531	0.0232206	931
1:22735058:G:A	rs6687487	EPHB2.5077.28.3	PMID:30053915	Scepanovic P	Anti-hepatitis B virus surface antigen (HBs) IgG levels	-0.232335	0.10307	0.0246238	508
1:22735058:G:A	rs6687487	EPHB2.5077.28.3		UKB Neale v2	Parkinson's disease | illnesses of mother	-0.0731673	0.035881	0.0414301	330077	5443
1:22735058:G:A	rs6687487	EPHB2.5077.28.3		UKB Neale v2	Bleeding gums | mouth/teeth dental problems	-0.0271352	0.0131485	0.0390382	359841	46694
1:22735058:G:A	rs6687487	EPHB2.5077.28.3	PMID:20081857	Saxena R	Two-hour glucose challenge	0.075	0.032	0.02068	15234
1:22735058:G:A	rs6687487	EPHB2.5077.28.3	PMID:20081858	Dupuis J	Fasting blood glucose	0.025	0.007	0.0004164	46186
1:22735058:G:A	rs6687487	EPHB2.5077.28.3		UKB Neale v2	Adizem-60 m/r tablet | treatment/medication code	0.380666	0.148918	0.0105807	361141	322
1:22735058:G:A	rs6687487	EPHB2.5077.28.3		UKB Neale v2	Ingesting a medication in excess of the normal dose | methods of self-harm used	0.101875	0.049684	0.040319	117733	2937
1:22735058:G:A	rs6687487	EPHB2.5077.28.3		UKB SAIGE	Other disorders of soft tissues	-0.0679	0.0346006	0.0494	384881	6170
1:22735058:G:A	rs6687487	EPHB2.5077.28.3		UKB Neale v2	Ever prescribed a medication for unusual or psychotic experiences	0.283102	0.110012	0.0100943	5777	642
1:22735058:G:A	rs6687487	EPHB2.5077.28.3		UKB SAIGE	Malignant neoplasm of other and ill-defined sites within the digestive organs and peritoneum	0.0718	0.0363007	0.048	398956	5584
1:22735058:G:A	rs6687487	EPHB2.5077.28.3		UKB Neale v2	Burns | non-cancer illness code, self-reported	-0.291747	0.145373	0.0447588	361141	338
1:22735058:G:A	rs6687487	EPHB2.5077.28.3	PMID:25751625	Michailidou K	Breast cancer	0.744197	0.01895	0.0130397	89677	46785
1:22735058:G:A	rs6687487	EPHB2.5077.28.3		UKB Neale v2	Desloratadine | treatment/medication code	0.279111	0.122146	0.0223074	361141	479
1:22735058:G:A	rs6687487	EPHB2.5077.28.3		UKB Neale v2	Meningitis | non-cancer illness code, self-reported	-0.149503	0.0687829	0.0297366	361141	1515
1:22735058:G:A	rs6687487	EPHB2.5077.28.3		UKB Neale v2	Fentanyl | treatment/medication code	-0.552384	0.259536	0.0333049	361141	106
1:22735058:G:A	rs6687487	EPHB2.5077.28.3		UKB SAIGE	Myocardial infarction	0.0616	0.0260005	0.018	388806	11703
1:22735058:G:A	rs6687487	EPHB2.5077.28.3		UKB Neale v2	Duration of worst depression	-0.0409482	0.0158851	0.00994596	65546
1:22735058:G:A	rs6687487	EPHB2.5077.28.3		UKB Neale v2	Fish oil (including cod liver oil) | mineral and other dietary supplements	0.0213243	0.00940179	0.0233203	360016	114131
1:22735058:G:A	rs6687487	EPHB2.5077.28.3		UKB Neale v2	Frequency of difficulty controlling worry during worst period of anxiety	-0.0199028	0.00988726	0.044125	36157
1:22735058:G:A	rs6687487	EPHB2.5077.28.3		UKB Neale v2	Age cataract diagnosed	-0.887627	0.365675	0.0152439	5020
1:22735058:G:A	rs6687487	EPHB2.5077.28.3		UKB SAIGE	Nonrheumatic mitral valve disorders	-0.11	0.0500009	0.0272	405313	2892
1:22735058:G:A	rs6687487	EPHB2.5077.28.3		UKB Neale v2	Levothyroxine sodium | treatment/medication code	-0.0447763	0.0222791	0.044451	361141	14689
1:22735058:G:A	rs6687487	EPHB2.8225.86.3		UKB Neale v2	None of the above | manic/hyper symptoms	-0.0949239	0.0353187	0.00719993	24049	8672
1:22735058:G:A	rs6687487	EPHB2.8225.86.3		UKB Neale v2	Icd10: c64 malignant neoplasm of kidney, except renal pelvis | underlying (primary) cause of death	0.43947	0.20624	0.0331241	9092	178
1:22735058:G:A	rs6687487	EPHB2.8225.86.3		UKB Neale v2	Birth weight of first child	0.0113898	0.00528738	0.0312296	155202
1:22735058:G:A	rs6687487	EPHB2.8225.86.3		UKB SAIGE	Rash and other nonspecific skin eruption	0.116	0.0576011	0.0436	405564	2157
1:22735058:G:A	rs6687487	EPHB2.8225.86.3		UKB Neale v2	Number of self-reported non-cancer illnesses	-0.00765246	0.00355348	0.0312793	361141
1:22735058:G:A	rs6687487	EPHB2.8225.86.3		UKB Neale v2	Bowel / intestinal obstruction | non-cancer illness code, self-reported	0.536845	0.216029	0.0129519	361141	153
1:22735058:G:A	rs6687487	EPHB2.8225.86.3		UKB Neale v2	Rosiglitazone 1mg / metformin 500mg tablet | treatment/medication code	-0.533813	0.216723	0.0137725	361141	152
1:22735058:G:A	rs6687487	EPHB2.8225.86.3		UKB Neale v2	Penicillin | treatment/medication code	-0.363574	0.180999	0.0445653	361141	218
1:22735058:G:A	rs6687487	EPHB2.8225.86.3		UKB SAIGE	Skull and face fracture and other intercranial injury	0.105	0.0497009	0.0339	408511	2957
1:22735058:G:A	rs6687487	EPHB2.8225.86.3		UKB Neale v2	Pulse rate	0.196054	0.0884874	0.0267199	118850
1:22735058:G:A	rs6687487	EPHB2.8225.86.3		UKB Neale v2	Fracture foot | non-cancer illness code, self-reported	0.477684	0.172508	0.00562144	361141	240
1:22735058:G:A	rs6687487	EPHB2.8225.86.3		UKB SAIGE	Lupus (localized and systemic)	0.312	0.131002	0.0178	401783	418
1:22735058:G:A	rs6687487	EPHB2.8225.86.3		UKB SAIGE	Heart valve disorders	-0.0828	0.0416008	0.0463	406660	4239
1:22735058:G:A	rs6687487	EPHB2.8225.86.3		UKB Neale v2	Losartan potassium+hydrochlorothiazide 50mg/12.5mg tablet | treatment/medication code	-0.337207	0.154294	0.0288509	361141	300
1:22735058:G:A	rs6687487	EPHB2.8225.86.3		UKB SAIGE	Musculoskeletal symptoms referable to limbs	-0.103	0.0365007	0.00496	408961	5493
1:22735058:G:A	rs6687487	EPHB2.8225.86.3		UKB SAIGE	Simple and unspecified goiter	0.225	0.109002	0.0387	392031	602
1:22735058:G:A	rs6687487	EPHB2.8225.86.3		UKB SAIGE	Other open wound of head and face	0.102	0.0499009	0.0408	403345	2919
1:22735058:G:A	rs6687487	EPHB2.8225.86.3		UKB Neale v2	Elocon cream | treatment/medication code	-0.339021	0.172511	0.0493861	361141	240
1:22735058:G:A	rs6687487	EPHB2.8225.86.3	PMID:28887542	Prins BP	Aspartate aminotransferase levels	-0.01	0.01	0.0416999	9463
1:22735058:G:A	rs6687487	EPHB2.8225.86.3		UKB Neale v2	Stayed about the same or was on a diet | weight change during worst episode of depression	0.0729641	0.0219751	0.000899576	56571	22981
1:22735058:G:A	rs6687487	EPHB2.8225.86.3		UKB Neale v2	Forced expiratory volume in 1-second (fev1)	0.00614958	0.00266647	0.0210967	329404
1:22735058:G:A	rs6687487	EPHB2.8225.86.3		UKB Neale v2	Allergy/hypersensitivity/anaphylaxis | non-cancer illness code, self-reported	0.103824	0.052349	0.0473303	361141	2622
1:22735058:G:A	rs6687487	EPHB2.8225.86.3		UKB Neale v2	Salazopyrin 500mg tablet | treatment/medication code	0.354615	0.17508	0.0428194	361141	233
1:22735058:G:A	rs6687487	EPHB2.8225.86.3		UKB SAIGE	Congenital coagulation defects	-0.271	0.123002	0.0269	406754	473
1:22735058:G:A	rs6687487	EPHB2.8225.86.3		UKB Neale v2	Calcichew d3 tablet | treatment/medication code	0.124937	0.045663	0.00621698	361141	3423
1:22735058:G:A	rs6687487	EPHB2.8225.86.3		UKB SAIGE	Open wounds of head; neck; and trunk	0.0968	0.0435008	0.0263	404263	3837
1:22735058:G:A	rs6687487	EPHB2.8225.86.3		UKB SAIGE	Multiple myeloma	-0.269	0.114002	0.0181	405018	552
1:22735058:G:A	rs6687487	EPHB2.8225.86.3		UKB Neale v2	Telmisartan | treatment/medication code	-0.260718	0.110793	0.0186104	361141	582
1:22735058:G:A	rs6687487	EPHB2.8225.86.3		UKB Neale v2	Nitrazepam | treatment/medication code	-0.410385	0.177754	0.020957	361141	226
1:22735058:G:A	rs6687487	EPHB2.8225.86.3		UKB Neale v2	Peripheral neuropathy | non-cancer illness code, self-reported	0.314151	0.117233	0.00736759	361141	520
1:22735058:G:A	rs6687487	EPHB2.8225.86.3		UKB SAIGE	Impacted cerumen	-0.279	0.140003	0.0465	407873	363
1:22735058:G:A	rs6687487	EPHB2.8225.86.3		UKB Neale v2	Co-amilofruse | treatment/medication code	0.280015	0.141423	0.0477024	361141	357
1:22735058:G:A	rs6687487	EPHB2.8225.86.3		UKB Neale v2	Forced vital capacity (fvc)	0.00834086	0.00345767	0.0158539	329404
1:22735058:G:A	rs6687487	EPHB2.8225.86.3		UKB SAIGE	Disorders of parathyroid gland	-0.227	0.0908017	0.0122	406263	877
1:22735058:G:A	rs6687487	EPHB2.8225.86.3		UKB Neale v2	Diltiazem | treatment/medication code	0.22008	0.0983931	0.0253015	361141	738
1:22735058:G:A	rs6687487	EPHB2.8225.86.3		UKB Neale v2	Doctor diagnosed hayfever or allergic rhinitis	-0.042373	0.0209709	0.0433239	91787	20904
1:22735058:G:A	rs6687487	EPHB2.8225.86.3		UKB Neale v2	Diagnosed with life-threatening illness	0.0463415	0.0207998	0.0258813	117617	19291
1:22735058:G:A	rs6687487	EPHB2.8225.86.3		UKB Neale v2	Forced vital capacity (fvc), best measure	0.00712415	0.00350995	0.0423876	272338
1:22735058:G:A	rs6687487	EPHB2.8225.86.3		UKB Neale v2	Yes | job involved shift work	0.0409865	0.0194904	0.0354735	91149	25698
1:22735058:G:A	rs6687487	EPHB2.8225.86.3		UKB Neale v2	Jaundice (unknown cause) | non-cancer illness code, self-reported	0.49879	0.155343	0.00132302	361141	296
1:22735058:G:A	rs6687487	EPHB2.8225.86.3		UKB SAIGE	Thyrotoxicosis with or without goiter	-0.133	0.0625011	0.0336	393289	1860
1:22735058:G:A	rs6687487	EPHB2.8225.86.3		UKB Neale v2	Fed-up feelings	0.019729	0.00906098	0.0294518	353764	143332
1:22735058:G:A	rs6687487	EPHB2.8225.86.3		UKB Neale v2	Asthma | non-cancer illness code, self-reported	-0.031246	0.0138611	0.0241791	361141	41934
1:22735058:G:A	rs6687487	EPHB2.8225.86.3		UKB Neale v2	Recent worrying too much about different things	0.0120004	0.00520352	0.0211009	117567
1:22735058:G:A	rs6687487	EPHB2.8225.86.3		UKB Neale v2	Chest pain or discomfort when walking uphill or hurrying	-0.0544487	0.0277147	0.0494608	44867	11938
1:22735058:G:A	rs6687487	EPHB2.8225.86.3		UKB Neale v2	Budesonide | treatment/medication code	-0.226257	0.0969392	0.0195939	361141	761
1:22735058:G:A	rs6687487	EPHB2.8225.86.3		UKB Neale v2	Doctor diagnosed copd (chronic obstructive pulmonary disease)	-0.170823	0.0729153	0.0191412	91787	1357
1:22735058:G:A	rs6687487	EPHB2.8225.86.3		UKB Neale v2	Lecithin product | treatment/medication code	-0.445119	0.183098	0.0150545	361141	213
1:22735058:G:A	rs6687487	EPHB2.8225.86.3		UKB SAIGE	Hyperparathyroidism	-0.232	0.0961018	0.0159	406167	781
1:22735058:G:A	rs6687487	EPHB2.8225.86.3		UKB Neale v2	Basophill count	-0.00944054	0.00379814	0.0129349	349856
1:22735058:G:A	rs6687487	EPHB2.8225.86.3		UKB Neale v2	None of the above (group 1) | illnesses of father	0.0196128	0.00983783	0.0461917	314797	116736
1:22735058:G:A	rs6687487	EPHB2.8225.86.3		UKB SAIGE	Synoviopathy	-0.292	0.146003	0.0462	379045	334
1:22735058:G:A	rs6687487	EPHB2.8225.86.3		UKB SAIGE	Swelling of limb	-0.0912	0.0395007	0.021	408131	4663
1:22735058:G:A	rs6687487	EPHB2.8225.86.3		UKB Neale v2	Difficulty stopping worrying during worst period of anxiety	-0.180982	0.0603178	0.00269699	35523	2057
1:22735058:G:A	rs6687487	EPHB2.8225.86.3		UKB Neale v2	Atrovent 20micrograms inhaler | treatment/medication code	-0.296008	0.14047	0.0350914	361141	362
1:22735058:G:A	rs6687487	EPHB2.8225.86.3		UKB SAIGE	Peptic ulcer, site unspecified	-0.26	0.131002	0.0476	401950	425
1:22735058:G:A	rs6687487	EPHB2.8225.86.3		UKB Neale v2	Yes, during the last year | ever been injured or injured someone else through drinking alcohol	-0.283546	0.113685	0.0126261	118002	552
1:22735058:G:A	rs6687487	EPHB2.8225.86.3		UKB Neale v2	Heart valve problem/heart murmur | non-cancer illness code, self-reported	-0.146431	0.0541172	0.00681312	361141	2453
1:22735058:G:A	rs6687487	EPHB2.8225.86.3		UKB SAIGE	Osteoarthrosis, localized, primary	-0.0753	0.0289005	0.00928	389591	9069
1:22735058:G:A	rs6687487	EPHB2.8225.86.3		UKB SAIGE	Rosacea	0.331	0.152003	0.0297	402982	310
1:22735058:G:A	rs6687487	EPHB2.8225.86.3		UKB Neale v2	Mood swings	0.0183699	0.00895632	0.0402579	352604	158982
1:22735058:G:A	rs6687487	EPHB2.8225.86.3		UKB Neale v2	Zapain caplet | treatment/medication code	0.565614	0.23169	0.0146352	361141	133
1:22735058:G:A	rs6687487	EPHB2.8225.86.3		UKB Neale v2	Nitrogen dioxide air pollution; 2005	-0.0845831	0.0422017	0.0450429	356078
1:22735058:G:A	rs6687487	EPHB2.8225.86.3		UKB SAIGE	Cough	0.169	0.0503009	0.000768	402717	2884
1:22735058:G:A	rs6687487	EPHB2.8225.86.3		UKB SAIGE	Abnormal findings on study of brain and/or nervous system	-0.417	0.192004	0.0299	395402	193
1:22735058:G:A	rs6687487	EPHB2.8225.86.3		UKB Neale v2	Forced expiratory volume in 1-second (fev1), best measure	0.00653676	0.00287053	0.0227752	272338
1:22735058:G:A	rs6687487	EPHB2.8225.86.3		UKB Neale v2	Neuroticism score	0.0432527	0.0157974	0.00618244	293006
1:22735058:G:A	rs6687487	EPHB2.8225.86.3		UKB SAIGE	Sexual and gender identity disorders	0.432	0.149003	0.00378	365798	322
1:22735058:G:A	rs6687487	EPHB2.8225.86.3		UKB Neale v2	Ezetrol 10mg tablet | treatment/medication code	-0.256891	0.103659	0.0132026	361141	665
1:22735058:G:A	rs6687487	EPHB2.8225.86.3		UKB SAIGE	Splenomegaly	0.289	0.129002	0.0257	385583	426
1:22735058:G:A	rs6687487	EPHB2.8225.86.3		UKB Neale v2	Furosemide | treatment/medication code	0.110403	0.0513738	0.0316306	361141	2714
1:22735058:G:A	rs6687487	EPHB2.8225.86.3		UKB Neale v2	Salbutamol | treatment/medication code	-0.0845496	0.0409486	0.0389414	361141	4305
1:22735058:G:A	rs6687487	EPHB2.8225.86.3	PMID:28887542	Prins BP	Dehydroepiandrosterone sulphate levels	-0.03	0.02	0.0359663	9722
1:22735058:G:A	rs6687487	EPHB2.8225.86.3		UKB SAIGE	Systemic lupus erythematosus	0.451	0.146003	0.00203	401707	342
1:22735058:G:A	rs6687487	EPHB2.8225.86.3		UKB SAIGE	Mitral valve disease	-0.116	0.0493009	0.0182	405406	2985
1:22735058:G:A	rs6687487	EPHB2.8225.86.3		UKB Neale v2	Cellulitis | non-cancer illness code, self-reported	0.350777	0.175453	0.0455766	361141	232
1:22735058:G:A	rs6687487	EPHB2.8225.86.3		UKB SAIGE	Open-angle glaucoma	0.194	0.0831015	0.0193	398804	1043
1:22735058:G:A	rs6687487	EPHB2.8225.86.3		UKB SAIGE	Keratitis	-0.356	0.155003	0.022	399603	297
1:22735058:G:A	rs6687487	EPHB2.8225.86.3		UKB Neale v2	Heel bone mineral density (bmd) t-score, automated (right)	-0.0186254	0.00928581	0.0448809	114614
1:22735058:G:A	rs6687487	EPHB2.8225.86.3	PMID:28887542	Prins BP	Alanine transaminase levels	-0.01	0	0.0133155	9731
1:22735058:G:A	rs6687487	EPHB2.8225.86.3		UKB Neale v2	Chronic fatigue syndrome | non-cancer illness code, self-reported	0.214596	0.065716	0.00109258	361141	1659
1:22735058:G:A	rs6687487	EPHB2.8225.86.3		UKB SAIGE	Carbuncle and furuncle	0.153	0.056001	0.0062	399937	2302
1:22735058:G:A	rs6687487	EPHB2.8225.86.3		UKB SAIGE	Sialoadenitis	0.369	0.140003	0.0086	403689	366
1:22735058:G:A	rs6687487	EPHB2.8225.86.3		UKB Neale v2	Feelings of worthlessness during worst period of depression	-0.044957	0.0209381	0.0317831	62128	30535
1:22735058:G:A	rs6687487	EPHB2.8225.86.3		UKB Neale v2	Cholesterol lowering medication | medication for cholesterol, blood pressure, diabetes, or take exogenous hormones	0.0462042	0.0177979	0.00942993	193148	24247
1:22735058:G:A	rs6687487	EPHB2.8225.86.3		UKB SAIGE	Intestinal obstruction without mention of hernia	-0.0967	0.0424008	0.0227	338777	3994
1:22735058:G:A	rs6687487	EPHB2.8225.86.3		UKB Neale v2	Hand grip strength (left)	0.0701021	0.0335907	0.0368936	359704
1:22735058:G:A	rs6687487	EPHB2.8225.86.3		UKB Neale v2	Snoring	0.0183533	0.0093102	0.0486855	336320	125656
1:22735058:G:A	rs6687487	EPHB2.8225.86.3		UKB SAIGE	Substance addiction and disorders	-0.299	0.135002	0.027	379747	392
1:22735058:G:A	rs6687487	EPHB2.8225.86.3		UKB SAIGE	Degenerative disease of the spinal cord	0.125	0.0632012	0.0486	396998	1789
1:22735058:G:A	rs6687487	EPHB2.8225.86.3		UKB SAIGE	Pallor and flushing	-0.467	0.203004	0.0211	407320	175
1:22735058:G:A	rs6687487	EPHB2.8225.86.3		UKB SAIGE	Open wound or laceration of eye or eyelid	0.333	0.162003	0.0396	400699	273
1:22735058:G:A	rs6687487	EPHB2.8225.86.3		UKB Neale v2	Worry too long after embarrassment	0.0231344	0.00898967	0.0100684	346527	165310
1:22735058:G:A	rs6687487	EPHB2.8225.86.3		UKB SAIGE	Corns and callosities	0.351	0.156003	0.0242	404168	293
1:22735058:G:A	rs6687487	EPHB2.8225.86.3		UKB Neale v2	Restaurant meals | type of meals eaten	0.0669159	0.0325686	0.0399174	51427	7829
1:22735058:G:A	rs6687487	EPHB2.8225.86.3		UKB Neale v2	Ongoing addiction to alcohol	-0.291076	0.107584	0.00686043	2739	1184
1:22735058:G:A	rs6687487	EPHB2.8225.86.3		UKB SAIGE	Pulmonary collapse; interstitial and compensatory emphysema	0.124	0.0598011	0.0388	399416	2005
1:22735058:G:A	rs6687487	EPHB2.8225.86.3		UKB Neale v2	Recent easy annoyance or irritability	0.0116086	0.00453368	0.0104527	117483
1:22735058:G:A	rs6687487	EPHB2.8225.86.3		UKB SAIGE	Other dyspnea	-0.218	0.0890016	0.0142	400745	912
1:22735058:G:A	rs6687487	EPHB2.8225.86.3		UKB Neale v2	Adizem-xl plus m/r capsule | treatment/medication code	0.38641	0.165398	0.0194763	361141	261
1:22735058:G:A	rs6687487	EPHB2.8225.86.3		UKB Neale v2	Lost weight | weight change during worst episode of depression	-0.0497156	0.022944	0.0302497	56571	20313
1:22735058:G:A	rs6687487	EPHB2.8225.86.3		UKB SAIGE	Acute pericarditis	0.507	0.181003	0.00517	405999	220
1:22735058:G:A	rs6687487	EPHB2.8225.86.3		UKB Neale v2	Both eyes | ever had refractive laser eye surgery	0.177373	0.0830281	0.0326947	5719	1258
1:22735058:G:A	rs6687487	EPHB2.8225.86.3	PMID:29531354	Malik R	Ischemic stroke	0.0358	0.0183	0.05	440328	34217
1:22735058:G:A	rs6687487	EPHB2.8225.86.3		UKB SAIGE	Paralytic strabismus	0.363	0.161003	0.0238	401522	277
1:22735058:G:A	rs6687487	EPHB2.8225.86.3		UKB Neale v2	Seen a psychiatrist for nerves, anxiety, tension or depression	0.0309696	0.0139707	0.0266367	359535	41233
1:22735058:G:A	rs6687487	EPHB2.8225.86.3		UKB Neale v2	Heart attack/myocardial infarction | non-cancer illness code, self-reported	0.0894797	0.0293932	0.00233247	361141	8239
1:22735058:G:A	rs6687487	EPHB2.8225.86.3		UKB Neale v2	Psychological/psychiatric problem | non-cancer illness code, self-reported	0.355983	0.140286	0.0111623	361141	363
1:22735058:G:A	rs6687487	EPHB2.8225.86.3		UKB Neale v2	Knee pain | pain type(s) experienced in last month	-0.0254244	0.0108442	0.01905	360391	76628
1:22735058:G:A	rs6687487	EPHB2.8225.86.3		UKB Neale v2	Frequency of consuming six or more units of alcohol	-0.0181634	0.00911438	0.0462827	108485
1:22735058:G:A	rs6687487	EPHB2.8225.86.3		UKB Neale v2	Evening primrose oil | treatment/medication code	0.0750796	0.0353631	0.0337427	361141	5730
1:22735058:G:A	rs6687487	EPHB2.8225.86.3		UKB Neale v2	Doctor diagnosed sarcoidosis	-0.37108	0.134899	0.0059452	91787	395
1:22735058:G:A	rs6687487	EPHB2.8225.86.3		UKB Neale v2	Epanutin 25mg capsule | treatment/medication code	-0.348645	0.162948	0.0323833	361141	269
1:22735058:G:A	rs6687487	EPHB2.8225.86.3		UKB Neale v2	Chronic bronchitis/emphysema | illnesses of adopted father	0.264285	0.130481	0.042922	2622	453
1:22735058:G:A	rs6687487	EPHB2.8225.86.3		UKB SAIGE	Primary open angle glaucoma	0.194	0.0833015	0.0196	398798	1037
1:22735058:G:A	rs6687487	EPHB2.8225.86.3		UKB Neale v2	Recent feelings of foreboding	0.00951144	0.00427691	0.0261569	117474
1:22735058:G:A	rs6687487	EPHB2.8225.86.3		UKB SAIGE	Difficulty in walking	-0.537	0.214004	0.012	402789	156
1:22735058:G:A	rs6687487	EPHB2.8225.86.3		UKB SAIGE	Aneurysm of other specified artery	0.486	0.189003	0.0102	400795	200
1:22735058:G:A	rs6687487	EPHB2.8225.86.3	PMID:29531354	Malik R	Stroke	0.0376	0.0167	0.02477	446696	40585
1:22735058:G:A	rs6687487	EPHB2.8225.86.3		UKB Neale v2	Zinc | mineral and other dietary supplements	0.0488458	0.0227044	0.0314435	360016	14402
1:22735058:G:A	rs6687487	EPHB2.8225.86.3		UKB SAIGE	Diabetic retinopathy	0.183	0.0733013	0.0123	398198	1339
1:22735058:G:A	rs6687487	EPHB2.8225.86.3		UKB SAIGE	Second degree av block	-0.299	0.126002	0.0174	381372	453
1:22735058:G:A	rs6687487	EPHB2.8225.86.3		UKB Neale v2	Amount of alcohol drunk on a typical drinking day	-0.0170602	0.00814128	0.036127	108256
1:22735058:G:A	rs6687487	EPHB2.8225.86.3		UKB SAIGE	Corneal ulcer	-0.471	0.225004	0.0366	399447	141
1:22735058:G:A	rs6687487	EPHB2.8225.86.3	PMID:29942086	Savage JE	Intelligence	-0.0109536	0.00497213	0.0276	269867
1:22735058:G:A	rs6687487	EPHB2.8225.86.3		UKB Neale v2	Red | hair colour (natural, before greying)	-0.0417405	0.0211797	0.0487454	360270	16615
1:22735058:G:A	rs6687487	EPHB2.8225.86.3		UKB SAIGE	Type 1 diabetes with renal manifestations	0.605	0.306006	0.0484	388832	76
1:22735058:G:A	rs6687487	EPHB2.8225.86.3		UKB Neale v2	Heart attack | vascular/heart problems diagnosed by doctor	0.081249	0.0293097	0.00556921	360420	8288
1:22735058:G:A	rs6687487	EPHB2.8225.86.3		UKB Neale v2	High blood pressure | illnesses of siblings	0.0410405	0.012167	0.000743187	281619	58495
1:22735058:G:A	rs6687487	EPHB2.8225.86.3		UKB Neale v2	Hypothyroidism/myxoedema | non-cancer illness code, self-reported	-0.0444786	0.0204039	0.0292623	361141	17574
1:22735058:G:A	rs6687487	EPHB2.8225.86.3		UKB SAIGE	Allergic reaction to food	-0.462	0.197004	0.0192	405001	184
1:22735058:G:A	rs6687487	EPHB2.8225.86.3		UKB Neale v2	Headaches for 3+ months	-0.0613132	0.0201214	0.00231062	70181	32075
1:22735058:G:A	rs6687487	EPHB2.8225.86.3		UKB SAIGE	Other infectious and parasitic diseases	0.45	0.187003	0.0161	408634	205
1:22735058:G:A	rs6687487	EPHB2.8225.86.3		UKB SAIGE	Other endocrine disorders	-0.492	0.192004	0.0106	405581	195
1:22735058:G:A	rs6687487	EPHB2.8225.86.3	PMID:29531354	Malik R	Ischemic stroke (cardioembolic)	0.0879	0.0348	0.01164	413304	7193
1:22735058:G:A	rs6687487	EPHB2.8225.86.3		UKB SAIGE	Other intestinal obstruction	-0.111	0.0463009	0.017	338129	3346
1:22735058:G:A	rs6687487	EPHB2.8225.86.3		UKB SAIGE	Pericarditis	0.156	0.0751014	0.0373	407052	1273
1:22735058:G:A	rs6687487	EPHB2.8225.86.3		UKB Neale v2	Subset inclusion logic | fi13	-0.296205	0.116689	0.0111854	2964	647
1:22735058:G:A	rs6687487	EPHB2.8225.86.3		UKB Neale v2	Ever addicted to any substance or behaviour	-0.0755322	0.0327232	0.0209866	116746	7023
1:22735058:G:A	rs6687487	EPHB2.8225.86.3		UKB Neale v2	Acute infective polyneuritis/guillain-barre syndrome | non-cancer illness code, self-reported	0.410647	0.20495	0.0451042	361141	170
1:22735058:G:A	rs6687487	EPHB2.8225.86.3		UKB Neale v2	Penicillin v | treatment/medication code	-0.408857	0.198637	0.0395566	361141	181
1:22735058:G:A	rs6687487	EPHB2.8225.86.3		UKB Neale v2	Icd10: c56 malignant neoplasm of ovary | underlying (primary) cause of death	-0.417003	0.180026	0.0205592	9092	226
1:22735058:G:A	rs6687487	EPHB2.8225.86.3		UKB Neale v2	Hydroxychloroquine | treatment/medication code	0.239406	0.117557	0.0416949	361141	517
1:22735058:G:A	rs6687487	EPHB2.8225.86.3		UKB Neale v2	Macular degeneration | eye problems/disorders	-0.121562	0.0515474	0.0183605	117890	2726
1:22735058:G:A	rs6687487	EPHB2.8225.86.3		UKB SAIGE	Herpes zoster with nervous system complications	-0.711	0.275005	0.00971	403412	96
1:22735058:G:A	rs6687487	EPHB2.8225.86.3		UKB Neale v2	Gestational diabetes only	0.235837	0.10104	0.0196206	6119	691
1:22735058:G:A	rs6687487	EPHB2.8225.86.3		UKB SAIGE	Erythematous conditions	0.133	0.054401	0.0147	405092	2420
1:22735058:G:A	rs6687487	EPHB2.8225.86.3		UKB Neale v2	Rhinocort 50micrograms nasal spray | treatment/medication code	0.558725	0.211262	0.00817553	361141	160
1:22735058:G:A	rs6687487	EPHB2.8225.86.3		UKB Neale v2	Often | worked with materials containing asbestos	0.159699	0.0716344	0.0257888	76457	1262
1:22735058:G:A	rs6687487	EPHB2.8225.86.3		UKB SAIGE	Diseases of the salivary glands	0.32	0.101002	0.00151	404033	710
1:22735058:G:A	rs6687487	EPHB2.8225.86.3		UKB SAIGE	Arrhythmia (cardiac) nos	-0.195	0.0882016	0.0271	381841	922
1:22735058:G:A	rs6687487	EPHB2.8225.86.3		UKB Neale v2	Asthma | blood clot, dvt, bronchitis, emphysema, asthma, rhinitis, eczema, allergy diagnosed by doctor	-0.0275087	0.0139043	0.0478762	360527	41633
1:22735058:G:A	rs6687487	EPHB2.8225.86.3		UKB Neale v2	Buprenorphine | treatment/medication code	0.342189	0.172508	0.0472966	361141	240
1:22735058:G:A	rs6687487	EPHB2.8225.86.3		UKB Neale v2	Heel quantitative ultrasound index (qui), direct entry (right)	-0.329887	0.16448	0.0448983	114614
1:22735058:G:A	rs6687487	EPHB2.8225.86.3		UKB Neale v2	Nitrogen dioxide air pollution; 2006	-0.0775125	0.0385386	0.0442951	356078
1:22735058:G:A	rs6687487	EPHB2.8225.86.3		UKB SAIGE	Chronic tonsillitis and adenoiditis	-0.221	0.0801015	0.00582	391171	1126
1:22735058:G:A	rs6687487	EPHB2.8225.86.3	PMID:30053915	Scepanovic P	Anti-varicella zoster virus IgG levels	-0.0398583	0.017531	0.0232206	931
1:22735058:G:A	rs6687487	EPHB2.8225.86.3	PMID:30053915	Scepanovic P	Anti-hepatitis B virus surface antigen (HBs) IgG levels	-0.232335	0.10307	0.0246238	508
1:22735058:G:A	rs6687487	EPHB2.8225.86.3		UKB Neale v2	Parkinson's disease | illnesses of mother	-0.0731673	0.035881	0.0414301	330077	5443
1:22735058:G:A	rs6687487	EPHB2.8225.86.3		UKB Neale v2	Bleeding gums | mouth/teeth dental problems	-0.0271352	0.0131485	0.0390382	359841	46694
1:22735058:G:A	rs6687487	EPHB2.8225.86.3	PMID:20081857	Saxena R	Two-hour glucose challenge	0.075	0.032	0.02068	15234
1:22735058:G:A	rs6687487	EPHB2.8225.86.3	PMID:20081858	Dupuis J	Fasting blood glucose	0.025	0.007	0.0004164	46186
1:22735058:G:A	rs6687487	EPHB2.8225.86.3		UKB Neale v2	Adizem-60 m/r tablet | treatment/medication code	0.380666	0.148918	0.0105807	361141	322
1:22735058:G:A	rs6687487	EPHB2.8225.86.3		UKB Neale v2	Ingesting a medication in excess of the normal dose | methods of self-harm used	0.101875	0.049684	0.040319	117733	2937
1:22735058:G:A	rs6687487	EPHB2.8225.86.3		UKB SAIGE	Other disorders of soft tissues	-0.0679	0.0346006	0.0494	384881	6170
1:22735058:G:A	rs6687487	EPHB2.8225.86.3		UKB Neale v2	Ever prescribed a medication for unusual or psychotic experiences	0.283102	0.110012	0.0100943	5777	642
1:22735058:G:A	rs6687487	EPHB2.8225.86.3		UKB SAIGE	Malignant neoplasm of other and ill-defined sites within the digestive organs and peritoneum	0.0718	0.0363007	0.048	398956	5584
1:22735058:G:A	rs6687487	EPHB2.8225.86.3		UKB Neale v2	Burns | non-cancer illness code, self-reported	-0.291747	0.145373	0.0447588	361141	338
1:22735058:G:A	rs6687487	EPHB2.8225.86.3	PMID:25751625	Michailidou K	Breast cancer	0.744197	0.01895	0.0130397	89677	46785
1:22735058:G:A	rs6687487	EPHB2.8225.86.3		UKB Neale v2	Desloratadine | treatment/medication code	0.279111	0.122146	0.0223074	361141	479
1:22735058:G:A	rs6687487	EPHB2.8225.86.3		UKB Neale v2	Meningitis | non-cancer illness code, self-reported	-0.149503	0.0687829	0.0297366	361141	1515
1:22735058:G:A	rs6687487	EPHB2.8225.86.3		UKB Neale v2	Fentanyl | treatment/medication code	-0.552384	0.259536	0.0333049	361141	106
1:22735058:G:A	rs6687487	EPHB2.8225.86.3		UKB SAIGE	Myocardial infarction	0.0616	0.0260005	0.018	388806	11703
1:22735058:G:A	rs6687487	EPHB2.8225.86.3		UKB Neale v2	Duration of worst depression	-0.0409482	0.0158851	0.00994596	65546
1:22735058:G:A	rs6687487	EPHB2.8225.86.3		UKB Neale v2	Fish oil (including cod liver oil) | mineral and other dietary supplements	0.0213243	0.00940179	0.0233203	360016	114131
1:22735058:G:A	rs6687487	EPHB2.8225.86.3		UKB Neale v2	Frequency of difficulty controlling worry during worst period of anxiety	-0.0199028	0.00988726	0.044125	36157
1:22735058:G:A	rs6687487	EPHB2.8225.86.3		UKB Neale v2	Age cataract diagnosed	-0.887627	0.365675	0.0152439	5020
1:22735058:G:A	rs6687487	EPHB2.8225.86.3		UKB SAIGE	Nonrheumatic mitral valve disorders	-0.11	0.0500009	0.0272	405313	2892
1:22735058:G:A	rs6687487	EPHB2.8225.86.3		UKB Neale v2	Levothyroxine sodium | treatment/medication code	-0.0447763	0.0222791	0.044451	361141	14689
1:22735058:G:A	rs6687487	EPHB2.8348.4.3		UKB Neale v2	None of the above | manic/hyper symptoms	-0.0949239	0.0353187	0.00719993	24049	8672
1:22735058:G:A	rs6687487	EPHB2.8348.4.3		UKB Neale v2	Icd10: c64 malignant neoplasm of kidney, except renal pelvis | underlying (primary) cause of death	0.43947	0.20624	0.0331241	9092	178
1:22735058:G:A	rs6687487	EPHB2.8348.4.3		UKB Neale v2	Birth weight of first child	0.0113898	0.00528738	0.0312296	155202
1:22735058:G:A	rs6687487	EPHB2.8348.4.3		UKB SAIGE	Rash and other nonspecific skin eruption	0.116	0.0576011	0.0436	405564	2157
1:22735058:G:A	rs6687487	EPHB2.8348.4.3		UKB Neale v2	Number of self-reported non-cancer illnesses	-0.00765246	0.00355348	0.0312793	361141
1:22735058:G:A	rs6687487	EPHB2.8348.4.3		UKB Neale v2	Bowel / intestinal obstruction | non-cancer illness code, self-reported	0.536845	0.216029	0.0129519	361141	153
1:22735058:G:A	rs6687487	EPHB2.8348.4.3		UKB Neale v2	Rosiglitazone 1mg / metformin 500mg tablet | treatment/medication code	-0.533813	0.216723	0.0137725	361141	152
1:22735058:G:A	rs6687487	EPHB2.8348.4.3		UKB Neale v2	Penicillin | treatment/medication code	-0.363574	0.180999	0.0445653	361141	218
1:22735058:G:A	rs6687487	EPHB2.8348.4.3		UKB SAIGE	Skull and face fracture and other intercranial injury	0.105	0.0497009	0.0339	408511	2957
1:22735058:G:A	rs6687487	EPHB2.8348.4.3		UKB Neale v2	Pulse rate	0.196054	0.0884874	0.0267199	118850
1:22735058:G:A	rs6687487	EPHB2.8348.4.3		UKB Neale v2	Fracture foot | non-cancer illness code, self-reported	0.477684	0.172508	0.00562144	361141	240
1:22735058:G:A	rs6687487	EPHB2.8348.4.3		UKB SAIGE	Lupus (localized and systemic)	0.312	0.131002	0.0178	401783	418
1:22735058:G:A	rs6687487	EPHB2.8348.4.3		UKB SAIGE	Heart valve disorders	-0.0828	0.0416008	0.0463	406660	4239
1:22735058:G:A	rs6687487	EPHB2.8348.4.3		UKB Neale v2	Losartan potassium+hydrochlorothiazide 50mg/12.5mg tablet | treatment/medication code	-0.337207	0.154294	0.0288509	361141	300
1:22735058:G:A	rs6687487	EPHB2.8348.4.3		UKB SAIGE	Musculoskeletal symptoms referable to limbs	-0.103	0.0365007	0.00496	408961	5493
1:22735058:G:A	rs6687487	EPHB2.8348.4.3		UKB SAIGE	Simple and unspecified goiter	0.225	0.109002	0.0387	392031	602
1:22735058:G:A	rs6687487	EPHB2.8348.4.3		UKB SAIGE	Other open wound of head and face	0.102	0.0499009	0.0408	403345	2919
1:22735058:G:A	rs6687487	EPHB2.8348.4.3		UKB Neale v2	Elocon cream | treatment/medication code	-0.339021	0.172511	0.0493861	361141	240
1:22735058:G:A	rs6687487	EPHB2.8348.4.3	PMID:28887542	Prins BP	Aspartate aminotransferase levels	-0.01	0.01	0.0416999	9463
1:22735058:G:A	rs6687487	EPHB2.8348.4.3		UKB Neale v2	Stayed about the same or was on a diet | weight change during worst episode of depression	0.0729641	0.0219751	0.000899576	56571	22981
1:22735058:G:A	rs6687487	EPHB2.8348.4.3		UKB Neale v2	Forced expiratory volume in 1-second (fev1)	0.00614958	0.00266647	0.0210967	329404
1:22735058:G:A	rs6687487	EPHB2.8348.4.3		UKB Neale v2	Allergy/hypersensitivity/anaphylaxis | non-cancer illness code, self-reported	0.103824	0.052349	0.0473303	361141	2622
1:22735058:G:A	rs6687487	EPHB2.8348.4.3		UKB Neale v2	Salazopyrin 500mg tablet | treatment/medication code	0.354615	0.17508	0.0428194	361141	233
1:22735058:G:A	rs6687487	EPHB2.8348.4.3		UKB SAIGE	Congenital coagulation defects	-0.271	0.123002	0.0269	406754	473
1:22735058:G:A	rs6687487	EPHB2.8348.4.3		UKB Neale v2	Calcichew d3 tablet | treatment/medication code	0.124937	0.045663	0.00621698	361141	3423
1:22735058:G:A	rs6687487	EPHB2.8348.4.3		UKB SAIGE	Open wounds of head; neck; and trunk	0.0968	0.0435008	0.0263	404263	3837
1:22735058:G:A	rs6687487	EPHB2.8348.4.3		UKB SAIGE	Multiple myeloma	-0.269	0.114002	0.0181	405018	552
1:22735058:G:A	rs6687487	EPHB2.8348.4.3		UKB Neale v2	Telmisartan | treatment/medication code	-0.260718	0.110793	0.0186104	361141	582
1:22735058:G:A	rs6687487	EPHB2.8348.4.3		UKB Neale v2	Nitrazepam | treatment/medication code	-0.410385	0.177754	0.020957	361141	226
1:22735058:G:A	rs6687487	EPHB2.8348.4.3		UKB Neale v2	Peripheral neuropathy | non-cancer illness code, self-reported	0.314151	0.117233	0.00736759	361141	520
1:22735058:G:A	rs6687487	EPHB2.8348.4.3		UKB SAIGE	Impacted cerumen	-0.279	0.140003	0.0465	407873	363
1:22735058:G:A	rs6687487	EPHB2.8348.4.3		UKB Neale v2	Co-amilofruse | treatment/medication code	0.280015	0.141423	0.0477024	361141	357
1:22735058:G:A	rs6687487	EPHB2.8348.4.3		UKB Neale v2	Forced vital capacity (fvc)	0.00834086	0.00345767	0.0158539	329404
1:22735058:G:A	rs6687487	EPHB2.8348.4.3		UKB SAIGE	Disorders of parathyroid gland	-0.227	0.0908017	0.0122	406263	877
1:22735058:G:A	rs6687487	EPHB2.8348.4.3		UKB Neale v2	Diltiazem | treatment/medication code	0.22008	0.0983931	0.0253015	361141	738
1:22735058:G:A	rs6687487	EPHB2.8348.4.3		UKB Neale v2	Doctor diagnosed hayfever or allergic rhinitis	-0.042373	0.0209709	0.0433239	91787	20904
1:22735058:G:A	rs6687487	EPHB2.8348.4.3		UKB Neale v2	Diagnosed with life-threatening illness	0.0463415	0.0207998	0.0258813	117617	19291
1:22735058:G:A	rs6687487	EPHB2.8348.4.3		UKB Neale v2	Forced vital capacity (fvc), best measure	0.00712415	0.00350995	0.0423876	272338
1:22735058:G:A	rs6687487	EPHB2.8348.4.3		UKB Neale v2	Yes | job involved shift work	0.0409865	0.0194904	0.0354735	91149	25698
1:22735058:G:A	rs6687487	EPHB2.8348.4.3		UKB Neale v2	Jaundice (unknown cause) | non-cancer illness code, self-reported	0.49879	0.155343	0.00132302	361141	296
1:22735058:G:A	rs6687487	EPHB2.8348.4.3		UKB SAIGE	Thyrotoxicosis with or without goiter	-0.133	0.0625011	0.0336	393289	1860
1:22735058:G:A	rs6687487	EPHB2.8348.4.3		UKB Neale v2	Fed-up feelings	0.019729	0.00906098	0.0294518	353764	143332
1:22735058:G:A	rs6687487	EPHB2.8348.4.3		UKB Neale v2	Asthma | non-cancer illness code, self-reported	-0.031246	0.0138611	0.0241791	361141	41934
1:22735058:G:A	rs6687487	EPHB2.8348.4.3		UKB Neale v2	Recent worrying too much about different things	0.0120004	0.00520352	0.0211009	117567
1:22735058:G:A	rs6687487	EPHB2.8348.4.3		UKB Neale v2	Chest pain or discomfort when walking uphill or hurrying	-0.0544487	0.0277147	0.0494608	44867	11938
1:22735058:G:A	rs6687487	EPHB2.8348.4.3		UKB Neale v2	Budesonide | treatment/medication code	-0.226257	0.0969392	0.0195939	361141	761
1:22735058:G:A	rs6687487	EPHB2.8348.4.3		UKB Neale v2	Doctor diagnosed copd (chronic obstructive pulmonary disease)	-0.170823	0.0729153	0.0191412	91787	1357
1:22735058:G:A	rs6687487	EPHB2.8348.4.3		UKB Neale v2	Lecithin product | treatment/medication code	-0.445119	0.183098	0.0150545	361141	213
1:22735058:G:A	rs6687487	EPHB2.8348.4.3		UKB SAIGE	Hyperparathyroidism	-0.232	0.0961018	0.0159	406167	781
1:22735058:G:A	rs6687487	EPHB2.8348.4.3		UKB Neale v2	Basophill count	-0.00944054	0.00379814	0.0129349	349856
1:22735058:G:A	rs6687487	EPHB2.8348.4.3		UKB Neale v2	None of the above (group 1) | illnesses of father	0.0196128	0.00983783	0.0461917	314797	116736
1:22735058:G:A	rs6687487	EPHB2.8348.4.3		UKB SAIGE	Synoviopathy	-0.292	0.146003	0.0462	379045	334
1:22735058:G:A	rs6687487	EPHB2.8348.4.3		UKB SAIGE	Swelling of limb	-0.0912	0.0395007	0.021	408131	4663
1:22735058:G:A	rs6687487	EPHB2.8348.4.3		UKB Neale v2	Difficulty stopping worrying during worst period of anxiety	-0.180982	0.0603178	0.00269699	35523	2057
1:22735058:G:A	rs6687487	EPHB2.8348.4.3		UKB Neale v2	Atrovent 20micrograms inhaler | treatment/medication code	-0.296008	0.14047	0.0350914	361141	362
1:22735058:G:A	rs6687487	EPHB2.8348.4.3		UKB SAIGE	Peptic ulcer, site unspecified	-0.26	0.131002	0.0476	401950	425
1:22735058:G:A	rs6687487	EPHB2.8348.4.3		UKB Neale v2	Yes, during the last year | ever been injured or injured someone else through drinking alcohol	-0.283546	0.113685	0.0126261	118002	552
1:22735058:G:A	rs6687487	EPHB2.8348.4.3		UKB Neale v2	Heart valve problem/heart murmur | non-cancer illness code, self-reported	-0.146431	0.0541172	0.00681312	361141	2453
1:22735058:G:A	rs6687487	EPHB2.8348.4.3		UKB SAIGE	Osteoarthrosis, localized, primary	-0.0753	0.0289005	0.00928	389591	9069
1:22735058:G:A	rs6687487	EPHB2.8348.4.3		UKB SAIGE	Rosacea	0.331	0.152003	0.0297	402982	310
1:22735058:G:A	rs6687487	EPHB2.8348.4.3		UKB Neale v2	Mood swings	0.0183699	0.00895632	0.0402579	352604	158982
1:22735058:G:A	rs6687487	EPHB2.8348.4.3		UKB Neale v2	Zapain caplet | treatment/medication code	0.565614	0.23169	0.0146352	361141	133
1:22735058:G:A	rs6687487	EPHB2.8348.4.3		UKB Neale v2	Nitrogen dioxide air pollution; 2005	-0.0845831	0.0422017	0.0450429	356078
1:22735058:G:A	rs6687487	EPHB2.8348.4.3		UKB SAIGE	Cough	0.169	0.0503009	0.000768	402717	2884
1:22735058:G:A	rs6687487	EPHB2.8348.4.3		UKB SAIGE	Abnormal findings on study of brain and/or nervous system	-0.417	0.192004	0.0299	395402	193
1:22735058:G:A	rs6687487	EPHB2.8348.4.3		UKB Neale v2	Forced expiratory volume in 1-second (fev1), best measure	0.00653676	0.00287053	0.0227752	272338
1:22735058:G:A	rs6687487	EPHB2.8348.4.3		UKB Neale v2	Neuroticism score	0.0432527	0.0157974	0.00618244	293006
1:22735058:G:A	rs6687487	EPHB2.8348.4.3		UKB SAIGE	Sexual and gender identity disorders	0.432	0.149003	0.00378	365798	322
1:22735058:G:A	rs6687487	EPHB2.8348.4.3		UKB Neale v2	Ezetrol 10mg tablet | treatment/medication code	-0.256891	0.103659	0.0132026	361141	665
1:22735058:G:A	rs6687487	EPHB2.8348.4.3		UKB SAIGE	Splenomegaly	0.289	0.129002	0.0257	385583	426
1:22735058:G:A	rs6687487	EPHB2.8348.4.3		UKB Neale v2	Furosemide | treatment/medication code	0.110403	0.0513738	0.0316306	361141	2714
1:22735058:G:A	rs6687487	EPHB2.8348.4.3		UKB Neale v2	Salbutamol | treatment/medication code	-0.0845496	0.0409486	0.0389414	361141	4305
1:22735058:G:A	rs6687487	EPHB2.8348.4.3	PMID:28887542	Prins BP	Dehydroepiandrosterone sulphate levels	-0.03	0.02	0.0359663	9722
1:22735058:G:A	rs6687487	EPHB2.8348.4.3		UKB SAIGE	Systemic lupus erythematosus	0.451	0.146003	0.00203	401707	342
1:22735058:G:A	rs6687487	EPHB2.8348.4.3		UKB SAIGE	Mitral valve disease	-0.116	0.0493009	0.0182	405406	2985
1:22735058:G:A	rs6687487	EPHB2.8348.4.3		UKB Neale v2	Cellulitis | non-cancer illness code, self-reported	0.350777	0.175453	0.0455766	361141	232
1:22735058:G:A	rs6687487	EPHB2.8348.4.3		UKB SAIGE	Open-angle glaucoma	0.194	0.0831015	0.0193	398804	1043
1:22735058:G:A	rs6687487	EPHB2.8348.4.3		UKB SAIGE	Keratitis	-0.356	0.155003	0.022	399603	297
1:22735058:G:A	rs6687487	EPHB2.8348.4.3		UKB Neale v2	Heel bone mineral density (bmd) t-score, automated (right)	-0.0186254	0.00928581	0.0448809	114614
1:22735058:G:A	rs6687487	EPHB2.8348.4.3	PMID:28887542	Prins BP	Alanine transaminase levels	-0.01	0	0.0133155	9731
1:22735058:G:A	rs6687487	EPHB2.8348.4.3		UKB Neale v2	Chronic fatigue syndrome | non-cancer illness code, self-reported	0.214596	0.065716	0.00109258	361141	1659
1:22735058:G:A	rs6687487	EPHB2.8348.4.3		UKB SAIGE	Carbuncle and furuncle	0.153	0.056001	0.0062	399937	2302
1:22735058:G:A	rs6687487	EPHB2.8348.4.3		UKB SAIGE	Sialoadenitis	0.369	0.140003	0.0086	403689	366
1:22735058:G:A	rs6687487	EPHB2.8348.4.3		UKB Neale v2	Feelings of worthlessness during worst period of depression	-0.044957	0.0209381	0.0317831	62128	30535
1:22735058:G:A	rs6687487	EPHB2.8348.4.3		UKB Neale v2	Cholesterol lowering medication | medication for cholesterol, blood pressure, diabetes, or take exogenous hormones	0.0462042	0.0177979	0.00942993	193148	24247
1:22735058:G:A	rs6687487	EPHB2.8348.4.3		UKB SAIGE	Intestinal obstruction without mention of hernia	-0.0967	0.0424008	0.0227	338777	3994
1:22735058:G:A	rs6687487	EPHB2.8348.4.3		UKB Neale v2	Hand grip strength (left)	0.0701021	0.0335907	0.0368936	359704
1:22735058:G:A	rs6687487	EPHB2.8348.4.3		UKB Neale v2	Snoring	0.0183533	0.0093102	0.0486855	336320	125656
1:22735058:G:A	rs6687487	EPHB2.8348.4.3		UKB SAIGE	Substance addiction and disorders	-0.299	0.135002	0.027	379747	392
1:22735058:G:A	rs6687487	EPHB2.8348.4.3		UKB SAIGE	Degenerative disease of the spinal cord	0.125	0.0632012	0.0486	396998	1789
1:22735058:G:A	rs6687487	EPHB2.8348.4.3		UKB SAIGE	Pallor and flushing	-0.467	0.203004	0.0211	407320	175
1:22735058:G:A	rs6687487	EPHB2.8348.4.3		UKB SAIGE	Open wound or laceration of eye or eyelid	0.333	0.162003	0.0396	400699	273
1:22735058:G:A	rs6687487	EPHB2.8348.4.3		UKB Neale v2	Worry too long after embarrassment	0.0231344	0.00898967	0.0100684	346527	165310
1:22735058:G:A	rs6687487	EPHB2.8348.4.3		UKB SAIGE	Corns and callosities	0.351	0.156003	0.0242	404168	293
1:22735058:G:A	rs6687487	EPHB2.8348.4.3		UKB Neale v2	Restaurant meals | type of meals eaten	0.0669159	0.0325686	0.0399174	51427	7829
1:22735058:G:A	rs6687487	EPHB2.8348.4.3		UKB Neale v2	Ongoing addiction to alcohol	-0.291076	0.107584	0.00686043	2739	1184
1:22735058:G:A	rs6687487	EPHB2.8348.4.3		UKB SAIGE	Pulmonary collapse; interstitial and compensatory emphysema	0.124	0.0598011	0.0388	399416	2005
1:22735058:G:A	rs6687487	EPHB2.8348.4.3		UKB Neale v2	Recent easy annoyance or irritability	0.0116086	0.00453368	0.0104527	117483
1:22735058:G:A	rs6687487	EPHB2.8348.4.3		UKB SAIGE	Other dyspnea	-0.218	0.0890016	0.0142	400745	912
1:22735058:G:A	rs6687487	EPHB2.8348.4.3		UKB Neale v2	Adizem-xl plus m/r capsule | treatment/medication code	0.38641	0.165398	0.0194763	361141	261
1:22735058:G:A	rs6687487	EPHB2.8348.4.3		UKB Neale v2	Lost weight | weight change during worst episode of depression	-0.0497156	0.022944	0.0302497	56571	20313
1:22735058:G:A	rs6687487	EPHB2.8348.4.3		UKB SAIGE	Acute pericarditis	0.507	0.181003	0.00517	405999	220
1:22735058:G:A	rs6687487	EPHB2.8348.4.3		UKB Neale v2	Both eyes | ever had refractive laser eye surgery	0.177373	0.0830281	0.0326947	5719	1258
1:22735058:G:A	rs6687487	EPHB2.8348.4.3	PMID:29531354	Malik R	Ischemic stroke	0.0358	0.0183	0.05	440328	34217
1:22735058:G:A	rs6687487	EPHB2.8348.4.3		UKB SAIGE	Paralytic strabismus	0.363	0.161003	0.0238	401522	277
1:22735058:G:A	rs6687487	EPHB2.8348.4.3		UKB Neale v2	Seen a psychiatrist for nerves, anxiety, tension or depression	0.0309696	0.0139707	0.0266367	359535	41233
1:22735058:G:A	rs6687487	EPHB2.8348.4.3		UKB Neale v2	Heart attack/myocardial infarction | non-cancer illness code, self-reported	0.0894797	0.0293932	0.00233247	361141	8239
1:22735058:G:A	rs6687487	EPHB2.8348.4.3		UKB Neale v2	Psychological/psychiatric problem | non-cancer illness code, self-reported	0.355983	0.140286	0.0111623	361141	363
1:22735058:G:A	rs6687487	EPHB2.8348.4.3		UKB Neale v2	Knee pain | pain type(s) experienced in last month	-0.0254244	0.0108442	0.01905	360391	76628
1:22735058:G:A	rs6687487	EPHB2.8348.4.3		UKB Neale v2	Frequency of consuming six or more units of alcohol	-0.0181634	0.00911438	0.0462827	108485
1:22735058:G:A	rs6687487	EPHB2.8348.4.3		UKB Neale v2	Evening primrose oil | treatment/medication code	0.0750796	0.0353631	0.0337427	361141	5730
1:22735058:G:A	rs6687487	EPHB2.8348.4.3		UKB Neale v2	Doctor diagnosed sarcoidosis	-0.37108	0.134899	0.0059452	91787	395
1:22735058:G:A	rs6687487	EPHB2.8348.4.3		UKB Neale v2	Epanutin 25mg capsule | treatment/medication code	-0.348645	0.162948	0.0323833	361141	269
1:22735058:G:A	rs6687487	EPHB2.8348.4.3		UKB Neale v2	Chronic bronchitis/emphysema | illnesses of adopted father	0.264285	0.130481	0.042922	2622	453
1:22735058:G:A	rs6687487	EPHB2.8348.4.3		UKB SAIGE	Primary open angle glaucoma	0.194	0.0833015	0.0196	398798	1037
1:22735058:G:A	rs6687487	EPHB2.8348.4.3		UKB Neale v2	Recent feelings of foreboding	0.00951144	0.00427691	0.0261569	117474
1:22735058:G:A	rs6687487	EPHB2.8348.4.3		UKB SAIGE	Difficulty in walking	-0.537	0.214004	0.012	402789	156
1:22735058:G:A	rs6687487	EPHB2.8348.4.3		UKB SAIGE	Aneurysm of other specified artery	0.486	0.189003	0.0102	400795	200
1:22735058:G:A	rs6687487	EPHB2.8348.4.3	PMID:29531354	Malik R	Stroke	0.0376	0.0167	0.02477	446696	40585
1:22735058:G:A	rs6687487	EPHB2.8348.4.3		UKB Neale v2	Zinc | mineral and other dietary supplements	0.0488458	0.0227044	0.0314435	360016	14402
1:22735058:G:A	rs6687487	EPHB2.8348.4.3		UKB SAIGE	Diabetic retinopathy	0.183	0.0733013	0.0123	398198	1339
1:22735058:G:A	rs6687487	EPHB2.8348.4.3		UKB SAIGE	Second degree av block	-0.299	0.126002	0.0174	381372	453
1:22735058:G:A	rs6687487	EPHB2.8348.4.3		UKB Neale v2	Amount of alcohol drunk on a typical drinking day	-0.0170602	0.00814128	0.036127	108256
1:22735058:G:A	rs6687487	EPHB2.8348.4.3		UKB SAIGE	Corneal ulcer	-0.471	0.225004	0.0366	399447	141
1:22735058:G:A	rs6687487	EPHB2.8348.4.3	PMID:29942086	Savage JE	Intelligence	-0.0109536	0.00497213	0.0276	269867
1:22735058:G:A	rs6687487	EPHB2.8348.4.3		UKB Neale v2	Red | hair colour (natural, before greying)	-0.0417405	0.0211797	0.0487454	360270	16615
1:22735058:G:A	rs6687487	EPHB2.8348.4.3		UKB SAIGE	Type 1 diabetes with renal manifestations	0.605	0.306006	0.0484	388832	76
1:22735058:G:A	rs6687487	EPHB2.8348.4.3		UKB Neale v2	Heart attack | vascular/heart problems diagnosed by doctor	0.081249	0.0293097	0.00556921	360420	8288
1:22735058:G:A	rs6687487	EPHB2.8348.4.3		UKB Neale v2	High blood pressure | illnesses of siblings	0.0410405	0.012167	0.000743187	281619	58495
1:22735058:G:A	rs6687487	EPHB2.8348.4.3		UKB Neale v2	Hypothyroidism/myxoedema | non-cancer illness code, self-reported	-0.0444786	0.0204039	0.0292623	361141	17574
1:22735058:G:A	rs6687487	EPHB2.8348.4.3		UKB SAIGE	Allergic reaction to food	-0.462	0.197004	0.0192	405001	184
1:22735058:G:A	rs6687487	EPHB2.8348.4.3		UKB Neale v2	Headaches for 3+ months	-0.0613132	0.0201214	0.00231062	70181	32075
1:22735058:G:A	rs6687487	EPHB2.8348.4.3		UKB SAIGE	Other infectious and parasitic diseases	0.45	0.187003	0.0161	408634	205
1:22735058:G:A	rs6687487	EPHB2.8348.4.3		UKB SAIGE	Other endocrine disorders	-0.492	0.192004	0.0106	405581	195
1:22735058:G:A	rs6687487	EPHB2.8348.4.3	PMID:29531354	Malik R	Ischemic stroke (cardioembolic)	0.0879	0.0348	0.01164	413304	7193
1:22735058:G:A	rs6687487	EPHB2.8348.4.3		UKB SAIGE	Other intestinal obstruction	-0.111	0.0463009	0.017	338129	3346
1:22735058:G:A	rs6687487	EPHB2.8348.4.3		UKB SAIGE	Pericarditis	0.156	0.0751014	0.0373	407052	1273
1:22735058:G:A	rs6687487	EPHB2.8348.4.3		UKB Neale v2	Subset inclusion logic | fi13	-0.296205	0.116689	0.0111854	2964	647
1:22735058:G:A	rs6687487	EPHB2.8348.4.3		UKB Neale v2	Ever addicted to any substance or behaviour	-0.0755322	0.0327232	0.0209866	116746	7023
1:22735058:G:A	rs6687487	EPHB2.8348.4.3		UKB Neale v2	Acute infective polyneuritis/guillain-barre syndrome | non-cancer illness code, self-reported	0.410647	0.20495	0.0451042	361141	170
1:22735058:G:A	rs6687487	EPHB2.8348.4.3		UKB Neale v2	Penicillin v | treatment/medication code	-0.408857	0.198637	0.0395566	361141	181
1:22735058:G:A	rs6687487	EPHB2.8348.4.3		UKB Neale v2	Icd10: c56 malignant neoplasm of ovary | underlying (primary) cause of death	-0.417003	0.180026	0.0205592	9092	226
1:22735058:G:A	rs6687487	EPHB2.8348.4.3		UKB Neale v2	Hydroxychloroquine | treatment/medication code	0.239406	0.117557	0.0416949	361141	517
1:22735058:G:A	rs6687487	EPHB2.8348.4.3		UKB Neale v2	Macular degeneration | eye problems/disorders	-0.121562	0.0515474	0.0183605	117890	2726
1:22735058:G:A	rs6687487	EPHB2.8348.4.3		UKB SAIGE	Herpes zoster with nervous system complications	-0.711	0.275005	0.00971	403412	96
1:22735058:G:A	rs6687487	EPHB2.8348.4.3		UKB Neale v2	Gestational diabetes only	0.235837	0.10104	0.0196206	6119	691
1:22735058:G:A	rs6687487	EPHB2.8348.4.3		UKB SAIGE	Erythematous conditions	0.133	0.054401	0.0147	405092	2420
1:22735058:G:A	rs6687487	EPHB2.8348.4.3		UKB Neale v2	Rhinocort 50micrograms nasal spray | treatment/medication code	0.558725	0.211262	0.00817553	361141	160
1:22735058:G:A	rs6687487	EPHB2.8348.4.3		UKB Neale v2	Often | worked with materials containing asbestos	0.159699	0.0716344	0.0257888	76457	1262
1:22735058:G:A	rs6687487	EPHB2.8348.4.3		UKB SAIGE	Diseases of the salivary glands	0.32	0.101002	0.00151	404033	710
1:22735058:G:A	rs6687487	EPHB2.8348.4.3		UKB SAIGE	Arrhythmia (cardiac) nos	-0.195	0.0882016	0.0271	381841	922
1:22735058:G:A	rs6687487	EPHB2.8348.4.3		UKB Neale v2	Asthma | blood clot, dvt, bronchitis, emphysema, asthma, rhinitis, eczema, allergy diagnosed by doctor	-0.0275087	0.0139043	0.0478762	360527	41633
1:22735058:G:A	rs6687487	EPHB2.8348.4.3		UKB Neale v2	Buprenorphine | treatment/medication code	0.342189	0.172508	0.0472966	361141	240
1:22735058:G:A	rs6687487	EPHB2.8348.4.3		UKB Neale v2	Heel quantitative ultrasound index (qui), direct entry (right)	-0.329887	0.16448	0.0448983	114614
1:22735058:G:A	rs6687487	EPHB2.8348.4.3		UKB Neale v2	Nitrogen dioxide air pollution; 2006	-0.0775125	0.0385386	0.0442951	356078
1:22735058:G:A	rs6687487	EPHB2.8348.4.3		UKB SAIGE	Chronic tonsillitis and adenoiditis	-0.221	0.0801015	0.00582	391171	1126
1:22735058:G:A	rs6687487	EPHB2.8348.4.3	PMID:30053915	Scepanovic P	Anti-varicella zoster virus IgG levels	-0.0398583	0.017531	0.0232206	931
1:22735058:G:A	rs6687487	EPHB2.8348.4.3	PMID:30053915	Scepanovic P	Anti-hepatitis B virus surface antigen (HBs) IgG levels	-0.232335	0.10307	0.0246238	508
1:22735058:G:A	rs6687487	EPHB2.8348.4.3		UKB Neale v2	Parkinson's disease | illnesses of mother	-0.0731673	0.035881	0.0414301	330077	5443
1:22735058:G:A	rs6687487	EPHB2.8348.4.3		UKB Neale v2	Bleeding gums | mouth/teeth dental problems	-0.0271352	0.0131485	0.0390382	359841	46694
1:22735058:G:A	rs6687487	EPHB2.8348.4.3	PMID:20081857	Saxena R	Two-hour glucose challenge	0.075	0.032	0.02068	15234
1:22735058:G:A	rs6687487	EPHB2.8348.4.3	PMID:20081858	Dupuis J	Fasting blood glucose	0.025	0.007	0.0004164	46186
1:22735058:G:A	rs6687487	EPHB2.8348.4.3		UKB Neale v2	Adizem-60 m/r tablet | treatment/medication code	0.380666	0.148918	0.0105807	361141	322
1:22735058:G:A	rs6687487	EPHB2.8348.4.3		UKB Neale v2	Ingesting a medication in excess of the normal dose | methods of self-harm used	0.101875	0.049684	0.040319	117733	2937
1:22735058:G:A	rs6687487	EPHB2.8348.4.3		UKB SAIGE	Other disorders of soft tissues	-0.0679	0.0346006	0.0494	384881	6170
1:22735058:G:A	rs6687487	EPHB2.8348.4.3		UKB Neale v2	Ever prescribed a medication for unusual or psychotic experiences	0.283102	0.110012	0.0100943	5777	642
1:22735058:G:A	rs6687487	EPHB2.8348.4.3		UKB SAIGE	Malignant neoplasm of other and ill-defined sites within the digestive organs and peritoneum	0.0718	0.0363007	0.048	398956	5584
1:22735058:G:A	rs6687487	EPHB2.8348.4.3		UKB Neale v2	Burns | non-cancer illness code, self-reported	-0.291747	0.145373	0.0447588	361141	338
1:22735058:G:A	rs6687487	EPHB2.8348.4.3	PMID:25751625	Michailidou K	Breast cancer	0.744197	0.01895	0.0130397	89677	46785
1:22735058:G:A	rs6687487	EPHB2.8348.4.3		UKB Neale v2	Desloratadine | treatment/medication code	0.279111	0.122146	0.0223074	361141	479
1:22735058:G:A	rs6687487	EPHB2.8348.4.3		UKB Neale v2	Meningitis | non-cancer illness code, self-reported	-0.149503	0.0687829	0.0297366	361141	1515
1:22735058:G:A	rs6687487	EPHB2.8348.4.3		UKB Neale v2	Fentanyl | treatment/medication code	-0.552384	0.259536	0.0333049	361141	106
1:22735058:G:A	rs6687487	EPHB2.8348.4.3		UKB SAIGE	Myocardial infarction	0.0616	0.0260005	0.018	388806	11703
1:22735058:G:A	rs6687487	EPHB2.8348.4.3		UKB Neale v2	Duration of worst depression	-0.0409482	0.0158851	0.00994596	65546
1:22735058:G:A	rs6687487	EPHB2.8348.4.3		UKB Neale v2	Fish oil (including cod liver oil) | mineral and other dietary supplements	0.0213243	0.00940179	0.0233203	360016	114131
1:22735058:G:A	rs6687487	EPHB2.8348.4.3		UKB Neale v2	Frequency of difficulty controlling worry during worst period of anxiety	-0.0199028	0.00988726	0.044125	36157
1:22735058:G:A	rs6687487	EPHB2.8348.4.3		UKB Neale v2	Age cataract diagnosed	-0.887627	0.365675	0.0152439	5020
1:22735058:G:A	rs6687487	EPHB2.8348.4.3		UKB SAIGE	Nonrheumatic mitral valve disorders	-0.11	0.0500009	0.0272	405313	2892
1:22735058:G:A	rs6687487	EPHB2.8348.4.3		UKB Neale v2	Levothyroxine sodium | treatment/medication code	-0.0447763	0.0222791	0.044451	361141	14689
10:89009208:A:G	rs7911226	FAS.5392.73.2	PMID:27863252	Astle WJ	High light scatter reticulocyte count	-0.00911758	0.00387793	0.01872	170761
10:89009208:A:G	rs7911226	FAS.5392.73.2		UKB SAIGE	Ulcerative colitis	0.0691	0.0274005	0.0118	337978	3195
10:89009208:A:G	rs7911226	FAS.5392.73.2		UKB Neale v2	Fexofenadine | treatment/medication code	0.0976771	0.0453025	0.0310729	361141	1145
10:89009208:A:G	rs7911226	FAS.5392.73.2		UKB SAIGE	Calculus of ureter	0.0739	0.0314006	0.0187	403422	2417
10:89009208:A:G	rs7911226	FAS.5392.73.2		UKB Neale v2	Eosinophill percentage	-0.019217	0.00475151	5.24669e-05	349861
10:89009208:A:G	rs7911226	FAS.5392.73.2		UKB SAIGE	Second degree av block	-0.17	0.0721013	0.0185	381372	453
10:89009208:A:G	rs7911226	FAS.5392.73.2		UKB SAIGE	Other peripheral nerve disorders	-0.0314	0.0142003	0.0266	406659	12592
10:89009208:A:G	rs7911226	FAS.5392.73.2		UKB Neale v2	No | job involved shift work	-0.0456386	0.0223795	0.041419	91149	4943
10:89009208:A:G	rs7911226	FAS.5392.73.2		UKB Neale v2	None of the above | medication for pain relief, constipation, heartburn	0.0117944	0.00512244	0.0213052	357084	159041
10:89009208:A:G	rs7911226	FAS.5392.73.2		UKB Neale v2	Milk added to cereal	-0.057368	0.0271163	0.0343779	51427	22510
10:89009208:A:G	rs7911226	FAS.5392.73.2		UKB SAIGE	Renal failure nos	-0.0866	0.0408007	0.0337	399014	1412
10:89009208:A:G	rs7911226	FAS.5392.73.2	PMID:27863252	Astle WJ	Eosinophil percentage of granulocytes	-0.010999	0.0038714	0.004496	170536
10:89009208:A:G	rs7911226	FAS.5392.73.2		UKB Neale v2	Number of rounds of numeric memory test performed	-0.0133553	0.00672167	0.0469403	37646
10:89009208:A:G	rs7911226	FAS.5392.73.2		UKB Neale v2	Nitrogen dioxide air pollution; 2010	0.0371803	0.0186701	0.0464337	356078
10:89009208:A:G	rs7911226	FAS.5392.73.2		UKB SAIGE	Abnormal sputum	0.0706	0.0329006	0.0319	408961	2167
10:89009208:A:G	rs7911226	FAS.5392.73.2		UKB Neale v2	Autism, asperger's or autistic spectrum disorder | mental health problems ever diagnosed by a professional	0.3039	0.118856	0.0105615	117707	166
10:89009208:A:G	rs7911226	FAS.5392.73.2		UKB Neale v2	Trospium | treatment/medication code	-0.281125	0.113478	0.0132343	361141	182
10:89009208:A:G	rs7911226	FAS.5392.73.2		UKB Neale v2	Multivitamins +/- minerals | vitamin and mineral supplements	-0.0138028	0.00619073	0.0257727	359245	77472
10:89009208:A:G	rs7911226	FAS.5392.73.2		UKB Neale v2	Frusemide | treatment/medication code	0.185676	0.0613008	0.00245391	361141	624
10:89009208:A:G	rs7911226	FAS.5392.73.2		UKB Neale v2	This type of shift pattern was not worked during job | mixture of day and night shifts worked	-0.0637803	0.0198172	0.0012903	25697	8764
10:89009208:A:G	rs7911226	FAS.5392.73.2		UKB Neale v2	Pattern 3 | hair/balding pattern	0.0168626	0.00841868	0.0451752	165649	44304
10:89009208:A:G	rs7911226	FAS.5392.73.2	PMID:27863252	Astle WJ	Sum eosinophil basophil counts	-0.00828178	0.00386347	0.03206	171771
10:89009208:A:G	rs7911226	FAS.5392.73.2		UKB Neale v2	Thyroxine product | treatment/medication code	0.0579157	0.0235557	0.0139441	361141	4246
10:89009208:A:G	rs7911226	FAS.5392.73.2		UKB Neale v2	Adopted mother still alive	0.100597	0.0456562	0.027626	3812	1078
10:89009208:A:G	rs7911226	FAS.5392.73.2		UKB Neale v2	Non-hodgkins lymphoma | cancer code, self-reported	-0.137954	0.0585714	0.0185058	361141	684
10:89009208:A:G	rs7911226	FAS.5392.73.2		UKB SAIGE	Acute renal failure	0.0473	0.0230004	0.0399	402123	4521
10:89009208:A:G	rs7911226	FAS.5392.73.2		UKB SAIGE	Abnormality of gait	0.0752	0.0383007	0.0494	407818	1601
10:89009208:A:G	rs7911226	FAS.5392.73.2		UKB SAIGE	Congenital osteodystrophies	-0.22	0.0735014	0.00272	408268	437
10:89009208:A:G	rs7911226	FAS.5392.73.2		UKB Neale v2	Shift pattern was worked for some (but not all) of job | day shifts worked	-0.126116	0.0379478	0.000890304	25697	1756
10:89009208:A:G	rs7911226	FAS.5392.73.2		UKB Neale v2	Panic attacks | mental health problems ever diagnosed by a professional	0.0389257	0.0195057	0.0459754	117722	6518
10:89009208:A:G	rs7911226	FAS.5392.73.2		UKB Neale v2	Any other phobia (eg disabling fear of heights or spiders) | mental health problems ever diagnosed by a professional	0.0809798	0.0386897	0.0363421	117710	1591
10:89009208:A:G	rs7911226	FAS.5392.73.2	PMID:30053915	Scepanovic P	Anti-herpes simplex virus 1 IgG levels	0.0394866	0.0158511	0.0130182	645
10:89009208:A:G	rs7911226	FAS.5392.73.2		UKB Neale v2	Type of accommodation lived in: A house or bungalow	-0.0204375	0.00873389	0.0192809	360088	33234
10:89009208:A:G	rs7911226	FAS.5392.73.2		UKB Neale v2	Nervous feelings	0.0169905	0.00604811	0.00496568	351829	83120
10:89009208:A:G	rs7911226	FAS.5392.73.2		UKB SAIGE	Melanomas of skin	-0.0698	0.0298005	0.0192	397762	2691
10:89009208:A:G	rs7911226	FAS.5392.73.2		UKB Neale v2	Frequency of needing morning drink of alcohol after heavy drinking session in last year	0.00173683	0.000876219	0.0474622	65099
10:89009208:A:G	rs7911226	FAS.5392.73.2		UKB Neale v2	Nitrogen dioxide air pollution; 2007	0.0523012	0.0254875	0.0401674	356078
10:89009208:A:G	rs7911226	FAS.5392.73.2		UKB Neale v2	Mean reticulocyte volume	0.041856	0.0201518	0.0377994	344728
10:89009208:A:G	rs7911226	FAS.5392.73.2		UKB Neale v2	Rheumatic fever | non-cancer illness code, self-reported	-0.140805	0.0470329	0.00275535	361141	1061
10:89009208:A:G	rs7911226	FAS.5392.73.2		UKB SAIGE	Cellulitis and abscess of trunk	0.143	0.0625011	0.0217	398237	602
10:89009208:A:G	rs7911226	FAS.5392.73.2	PMID:28067908	de Lange KM	Inflammatory bowel disease	0.032	0.0134	0.01711	59957	25042
10:89009208:A:G	rs7911226	FAS.5392.73.2		UKB SAIGE	Systemic lupus erythematosus	-0.206	0.0831015	0.013	401707	342
10:89009208:A:G	rs7911226	FAS.5392.73.2	PMID:27863252	Astle WJ	Reticulocyte count	-0.00968323	0.00388572	0.0127	170641
10:89009208:A:G	rs7911226	FAS.5392.73.2		UKB Neale v2	Ever smoked	0.0144733	0.00518512	0.00524916	359751	141560
10:89009208:A:G	rs7911226	FAS.5392.73.2		UKB Neale v2	Psoriatic arthropathy | non-cancer illness code, self-reported	-0.115261	0.057416	0.0446957	361141	712
10:89009208:A:G	rs7911226	FAS.5392.73.2		UKB Neale v2	Both eyes | which eye(s) affected by hypermetropia (long sight)	0.0704769	0.0355009	0.0471341	15090	2184
10:89009208:A:G	rs7911226	FAS.5392.73.2		UKB Neale v2	Beef intake	0.0105896	0.00523779	0.0432058	51422
10:89009208:A:G	rs7911226	FAS.5392.73.2		UKB SAIGE	Muscular dystrophies and other myopathies	0.145	0.0707013	0.0399	407322	470
10:89009208:A:G	rs7911226	FAS.5392.73.2		UKB Neale v2	3mm strong meridian (left)	-0.01935	0.00865097	0.0253058	75398
10:89009208:A:G	rs7911226	FAS.5392.73.2		UKB Neale v2	None of the above (group 1) | illnesses of mother	-0.0120174	0.00534904	0.0246598	332611	138291
10:89009208:A:G	rs7911226	FAS.5392.73.2		UKB Neale v2	Zirtek allergy 10mg tablet | treatment/medication code	-0.314923	0.145956	0.0309518	361141	110
10:89009208:A:G	rs7911226	FAS.5392.73.2		UKB Neale v2	Gtn - glyceryl trinitrate | treatment/medication code	-0.123736	0.0614356	0.043999	361141	621
10:89009208:A:G	rs7911226	FAS.5392.73.2	PMID:29777097	Marioni RE	Paternal history of Alzheimer's disease	-0.0367205	0.0170041	0.0308106	260279	14338
10:89009208:A:G	rs7911226	FAS.5392.73.2		UKB Neale v2	Cake intake	-0.0145473	0.0045746	0.00147354	51427
10:89009208:A:G	rs7911226	FAS.5392.73.2		UKB SAIGE	Urinary calculus	0.0446	0.0192004	0.0198	407648	6643
10:89009208:A:G	rs7911226	FAS.5392.73.2		UKB SAIGE	Congenital coagulation defects	0.149	0.0706013	0.0351	406754	473
10:89009208:A:G	rs7911226	FAS.5392.73.2		UKB Neale v2	Coffee intake	0.0042282	0.00197629	0.0323984	334659
10:89009208:A:G	rs7911226	FAS.5392.73.2		UKB SAIGE	Cancer of other lymphoid, histiocytic tissue	-0.0781	0.0323006	0.0156	406736	2270
10:89009208:A:G	rs7911226	FAS.5392.73.2		UKB Neale v2	Never | smoking status	-0.0124832	0.00506047	0.0136306	359706	164638
10:89009208:A:G	rs7911226	FAS.5392.73.2		UKB SAIGE	Other congenital musculoskeletal anomalies	-0.165	0.0630012	0.00869	408425	594
10:89009208:A:G	rs7911226	FAS.5392.73.2		UKB SAIGE	Urinary incontinence	-0.0386	0.0168003	0.0213	393786	8856
10:89009208:A:G	rs7911226	FAS.5392.73.2		UKB Neale v2	Shift pattern was worked for whole of job | day shifts worked	-0.043686	0.0221255	0.0483359	25697	6046
10:89009208:A:G	rs7911226	FAS.5392.73.2		UKB Neale v2	3mm strong meridian (right)	-0.0181618	0.00862303	0.0351902	75410
10:89009208:A:G	rs7911226	FAS.5392.73.2		UKB SAIGE	Rosacea	0.254	0.0871016	0.00358	402982	310
10:89009208:A:G	rs7911226	FAS.5392.73.2		UKB Neale v2	Mean platelet (thrombocyte) volume	-0.00554471	0.0027808	0.0461611	350470
10:89009208:A:G	rs7911226	FAS.5392.73.2		UKB Neale v2	Fracture ulna | non-cancer illness code, self-reported	-0.311372	0.140918	0.0271315	361141	118
10:89009208:A:G	rs7911226	FAS.5392.73.2		UKB Neale v2	Aprovel 75mg tablet | treatment/medication code	-0.190513	0.0868189	0.0282066	361141	311
10:89009208:A:G	rs7911226	FAS.5392.73.2		UKB Neale v2	Arithmetic sequence recognition | fi10	0.0670299	0.0262488	0.0106657	20880	4159
10:89009208:A:G	rs7911226	FAS.5392.73.2	PMID:29083406	Ferreira MA	Allergic disease (asthma, hay fever or eczema)	0.0131	0.0062	0.03477	360838	180129
10:89009208:A:G	rs7911226	FAS.5392.73.2		UKB Neale v2	3mm asymmetry index (right)	0.0806225	0.0395488	0.0414975	74038
10:89009208:A:G	rs7911226	FAS.5392.73.2		UKB Neale v2	Vitamin b compound tablet | treatment/medication code	0.0615494	0.0300038	0.0402261	361141	2619
10:89009208:A:G	rs7911226	FAS.5392.73.2	PMID:29292387	Turley P	Neuroticism	0.006	0.003	0.0283	168105
10:89009208:A:G	rs7911226	FAS.5392.73.2		UKB SAIGE	Acidosis	0.0926	0.0472009	0.05	402561	1055
10:89009208:A:G	rs7911226	FAS.5392.73.2		UKB Neale v2	Prozac 20mg capsule | treatment/medication code	-0.15121	0.0691046	0.0286585	361141	491
10:89009208:A:G	rs7911226	FAS.5392.73.2		UKB Neale v2	6mm weak meridian (right)	-0.0206575	0.00884532	0.0195245	66256
10:89009208:A:G	rs7911226	FAS.5392.73.2		UKB Neale v2	6mm strong meridian (right)	-0.0250281	0.00903375	0.00559847	66256
10:89009208:A:G	rs7911226	FAS.5392.73.2		UKB Neale v2	Metoclopramide | treatment/medication code	-0.165022	0.0729279	0.0236454	361141	441
10:89009208:A:G	rs7911226	FAS.5392.73.2		UKB Neale v2	Not performed - other reason | oct measured (right)	-0.0753957	0.0332584	0.0233939	54608	2207
10:89009208:A:G	rs7911226	FAS.5392.73.2		UKB Neale v2	Cereal intake	-0.00552655	0.0021707	0.0108979	345019
10:89009208:A:G	rs7911226	FAS.5392.73.2		UKB Neale v2	Time employed in main current job	0.0765229	0.0360933	0.0339953	194087
10:89009208:A:G	rs7911226	FAS.5392.73.2		UKB SAIGE	Melanomas of skin, dx or hx	-0.0698	0.0298005	0.0192	397762	2691
10:89009208:A:G	rs7911226	FAS.5392.73.2	PMID:29662059	Howard DM	Major depressive disorder (ICD-10 coded)	-0.0016036	0.00062854	0.0107325	217584	8276
10:89009208:A:G	rs7911226	FAS.5392.73.2		UKB SAIGE	Diseases of hard tissues of teeth	-0.0615	0.0278005	0.0267	401227	3091
10:89009208:A:G	rs7911226	FAS.5392.73.2		UKB Neale v2	Mean sphered cell volume	0.0424863	0.0136347	0.00183314	344729
10:89009208:A:G	rs7911226	FAS.5392.73.2		UKB Neale v2	High blood pressure | illnesses of father	0.0132955	0.0064071	0.0379726	315021	71136
10:89009208:A:G	rs7911226	FAS.5392.73.2		UKB SAIGE	Foreign body injury	0.145	0.0442008	0.00103	408961	1210
10:89009208:A:G	rs7911226	FAS.5392.73.2		UKB SAIGE	Cerebral edema and compression of brain	0.187	0.0954018	0.05	395467	258
10:89009208:A:G	rs7911226	FAS.5392.73.2	PMID:30053915	Scepanovic P	Anti-rubella virus IgG levels	0.0399847	0.0179499	0.0261502	935
10:89009208:A:G	rs7911226	FAS.5392.73.2		UKB Neale v2	Wears glasses or contact lenses	-0.01607	0.0074688	0.0314247	360677	38909
10:89009208:A:G	rs7911226	FAS.5392.73.2		UKB Neale v2	Age diabetes diagnosed	-0.257279	0.126792	0.0424597	16166
10:89009208:A:G	rs7911226	FAS.5392.73.2		UKB Neale v2	6mm strong meridian (left)	-0.0218159	0.00909052	0.0164045	65551
10:89009208:A:G	rs7911226	FAS.5392.73.2	PMID:27863252	Astle WJ	Eosinophil counts	-0.0106219	0.0038592	0.005917	172275
10:89009208:A:G	rs7911226	FAS.5392.73.2		UKB SAIGE	Dental caries	-0.0618	0.0279005	0.0269	401187	3051
10:89009208:A:G	rs7911226	FAS.5392.73.2	PMID:30220432	Haas ME	Urinary albumin excretion	-0.00375351	0.0018028	0.0373396	382500
10:89009208:A:G	rs7911226	FAS.5392.73.2		UKB SAIGE	Symptoms concerning nutrition, metabolism, and development	0.0475	0.0210004	0.0237	408961	5512
10:89009208:A:G	rs7911226	FAS.5392.73.2		UKB Neale v2	Adizem-xl plus m/r capsule | treatment/medication code	-0.257955	0.0947561	0.00648225	361141	261
10:89009208:A:G	rs7911226	FAS.5392.73.2	PMID:28067908	de Lange KM	Ulcerative colitis	0.0433	0.0171	0.01119	45975	12366
10:89009208:A:G	rs7911226	FAS.5392.73.2		UKB Neale v2	Round of numeric memory test	-0.013599	0.00672485	0.0431627	37575
10:89009208:A:G	rs7911226	FAS.5392.73.2		UKB Neale v2	Felt distant from other people in past month	0.0156649	0.00619627	0.0114703	52822
10:89009208:A:G	rs7911226	FAS.5392.73.2		UKB Neale v2	Skin colour	0.00330895	0.00148209	0.0255742	356530
10:89009208:A:G	rs7911226	FAS.5392.73.2		UKB SAIGE	Glomerulonephritis	-0.102	0.0478009	0.0335	398635	1033
10:89009208:A:G	rs7911226	FAS.5392.73.2		UKB SAIGE	Other infectious and parasitic diseases	0.266	0.107002	0.013	408634	205
10:89009208:A:G	rs7911226	FAS.5392.73.2		UKB SAIGE	Myopathy	0.169	0.0808015	0.0362	407211	359
10:89009208:A:G	rs7911226	FAS.5392.73.2		UKB Neale v2	Budesonide | treatment/medication code	0.113658	0.0555368	0.0407007	361141	761
10:89009208:A:G	rs7911226	FAS.5392.73.2		UKB Neale v2	Spherical power (right)	0.0343625	0.0152825	0.0245484	77983
10:89009208:A:G	rs7911226	FAS.5392.73.2		UKB Neale v2	Betahistine | treatment/medication code	-0.0923326	0.046907	0.0490167	361141	1067
10:89009208:A:G	rs7911226	FAS.5392.73.2		UKB Neale v2	Agoraphobia | mental health problems ever diagnosed by a professional	0.184889	0.0710203	0.009232	117707	468
10:89009208:A:G	rs7911226	FAS.5392.73.2	PMID:28887542	Prins BP	Serum albumin level	0.09	0.04	0.0196701	9824
10:89009208:A:G	rs7911226	FAS.5392.73.2		UKB Neale v2	Frequency of other exercises in last 4 weeks	0.00901417	0.00458753	0.0494239	172505
10:89009208:A:G	rs7911226	FAS.5392.73.2		UKB SAIGE	Cholecystitis without cholelithiasis	-0.0586	0.0294005	0.0466	394068	2761
10:89009208:A:G	rs7911226	FAS.5392.73.2		UKB Neale v2	Low forceps, not breech | delivery methods	0.209664	0.100513	0.0370128	8019	238
10:89009208:A:G	rs7911226	FAS.5392.73.2		UKB Neale v2	Dyspepsia / indigestion | non-cancer illness code, self-reported	-0.202826	0.0717943	0.00472597	361141	455
10:89009208:A:G	rs7911226	FAS.5392.73.2		UKB SAIGE	Jaw disease nos	-0.198	0.100002	0.0482	398370	234
10:89009208:A:G	rs7911226	FAS.5392.73.2		UKB SAIGE	Chronic glomerulonephritis, nos	-0.124	0.052801	0.0191	398447	845
10:89009208:A:G	rs7911226	FAS.5392.73.2		UKB SAIGE	Gastritis and duodenitis, nos	-0.393	0.138003	0.00436	378244	120
10:89009208:A:G	rs7911226	FAS.5392.73.2		UKB Neale v2	No | major dietary changes in the last 5 years	0.01032	0.00522916	0.0484299	360294	138926
10:89009208:A:G	rs7911226	FAS.5392.73.2		UKB Neale v2	Ankylosing spondylitis | non-cancer illness code, self-reported	-0.125792	0.047565	0.00817715	361141	1038
10:89009208:A:G	rs7911226	FAS.5392.73.2		UKB SAIGE	Nonsenile cataract	0.398	0.183003	0.0301	388679	70
10:89009208:A:G	rs7911226	FAS.5392.73.2		UKB Neale v2	Both eyes | ever had laser treatment for glaucoma or high eye pressure	0.283002	0.130763	0.0304837	5788	138
10:89009208:A:G	rs7911226	FAS.5392.73.2		UKB SAIGE	Malaise and fatigue	-0.0526	0.0264005	0.0465	408961	3429
10:89009208:A:G	rs7911226	FAS.5392.73.2		UKB Neale v2	Gabapentin | treatment/medication code	-0.0821824	0.0374937	0.0283841	361141	1674
10:89009208:A:G	rs7911226	FAS.5392.73.2		UKB Neale v2	Piriton 4mg tablet | treatment/medication code	0.135018	0.0642709	0.0356594	361141	568
10:89009208:A:G	rs7911226	FAS.5392.73.2		UKB Neale v2	Ever had eye surgery	0.0514163	0.0208183	0.0135201	79912	5825
10:89009208:A:G	rs7911226	FAS.5392.73.2		UKB Neale v2	Oxytetracycline | treatment/medication code	-0.104761	0.0467433	0.0250111	361141	1075
10:89009208:A:G	rs7911226	FAS.5392.73.2	PMID:27863252	Astle WJ	Eosinophil percentage of white cells	-0.0124764	0.00385473	0.001209	172378
10:89009208:A:G	rs7911226	FAS.5392.73.2		UKB Neale v2	Able to pay rent/mortgage as an adult	-0.0106894	0.00372507	0.00411092	116296
10:89009208:A:G	rs7911226	FAS.5392.73.2		UKB Neale v2	Celecoxib | treatment/medication code	-0.168271	0.0779377	0.0308438	361141	386
10:89009208:A:G	rs7911226	FAS.5392.73.2		UKB Neale v2	Sarcoidosis | non-cancer illness code, self-reported	-0.117189	0.0577001	0.0422513	361141	705
10:89009208:A:G	rs7911226	FAS.5392.73.2		UKB SAIGE	Nontoxic uninodular goiter	0.139	0.0705013	0.0495	391901	472
10:89009208:A:G	rs7911226	FAS.5392.73.2		UKB Neale v2	Spasmonal 60mg capsule | treatment/medication code	-0.20512	0.094407	0.0297995	361141	263
10:89009208:A:G	rs7911226	FAS.5392.73.2		UKB Neale v2	Public transport | types of transport used (excluding work)	-0.0143368	0.0054597	0.00864025	359324	107727
10:89009208:A:G	rs7911226	FAS.5392.73.2		UKB Neale v2	Astigmatism angle (right)	-0.638681	0.279363	0.0222451	77983
10:89009208:A:G	rs7911226	FAS.5392.73.2		UKB Neale v2	Elective caesarean section | delivery methods	0.105519	0.0485355	0.0297273	8019	1157
10:89009208:A:G	rs7911226	FAS.5392.73.2		UKB SAIGE	Allergic purpura	-0.442	0.215004	0.0394	406332	51
10:89009208:A:G	rs7911226	FAS.5392.73.2		UKB Neale v2	Morning/evening person (chronotype)	0.00696178	0.00249456	0.0052583	322488
10:89009208:A:G	rs7911226	FAS.5392.73.2	PMID:27863252	Astle WJ	Reticulocyte fraction of red cells	-0.0100366	0.00388335	0.009751	170690
10:89009208:A:G	rs7911226	FAS.5392.73.2		UKB Neale v2	Rarely/never | worked with paints, thinners or glues	-0.0549964	0.0264608	0.0376714	90389	3593
10:89009208:A:G	rs7911226	FAS.5392.73.2		UKB Neale v2	Time spend outdoors in summer	-0.00609744	0.0023173	0.00850708	327717
10:89009208:A:G	rs7911226	FAS.5392.73.2		UKB SAIGE	Chromosomal anomalies	-0.43	0.155003	0.00542	408036	99
10:89009208:A:G	rs7911226	FAS.5392.73.2		UKB SAIGE	Benign neoplasm of spinal cord, meninges	-0.453	0.200004	0.0234	407298	59
10:89009208:A:G	rs7911226	FAS.5392.73.2	PMID:29273806	Demenais F	Asthma	0.0282906	0.0138617	0.0412597	127669	19954
10:89009208:A:G	rs7911226	FAS.5392.73.2	PMID:27089181	Okbay A	Depression	0.009	0.004	0.02488	75306	16471
10:89009208:A:G	rs7911226	FAS.5392.73.2		UKB SAIGE	Disorder of skin and subcutaneous tissue nos	0.045	0.0202004	0.026	408961	5782
10:89009208:A:G	rs7911226	FAS.5392.73.2		UKB Neale v2	Vitamin d | vitamin and/or mineral supplement use	0.078652	0.0382145	0.0395745	51427	1638
10:89009208:A:G	rs7911226	FAS.5392.73.2		UKB Neale v2	Heart disease | illnesses of mother	0.0150578	0.00651845	0.0208854	332966	66343
10:89009208:A:G	rs7911226	FAS.5392.73.2	PMID:27089181	Okbay A	Neuroticism	0.008	0.004	0.04936	170911
10:89009208:A:G	rs7911226	FAS.5392.73.2		UKB SAIGE	Anomalies of respiratory system, congenital	0.442	0.215004	0.0397	408638	51
10:89009208:A:G	rs7911226	FAS.5392.73.2		UKB Neale v2	Soya | milk type used	-0.0285598	0.0135625	0.03522	360806	13147
10:89009208:A:G	rs7911226	FAS.5392.73.2		UKB Neale v2	Spherical power (left)	0.0339466	0.0154807	0.0283218	77739
10:89009208:A:G	rs7911226	FAS.5392.73.2	PMID:28194004	Deary V	Self-reported tiredness	0.0120559	0.00464891	0.0095067	108976
10:89009208:A:G	rs7911226	FAS.5392.73.2		UKB SAIGE	Other diseases of lung	0.114	0.054901	0.0372	408961	781
10:89009208:A:G	rs7911226	FAS.5392.73.2	PMID:29343764	Jiang X	Vitamin D levels	-0.0059	0.0023	0.01046	79366
10:89009208:A:G	rs7911226	FAS.5392.73.2		UKB Neale v2	Yes, during the last year | ever been injured or injured someone else through drinking alcohol	0.137943	0.0654417	0.0350402	118002	552
10:89009208:A:G	rs7911226	FAS.5392.73.2		UKB Neale v2	Dupuytren's contracture | non-cancer illness code, self-reported	-0.1849	0.0940348	0.0492626	361141	265
10:89009208:A:G	rs7911226	FAS.5392.73.2		UKB Neale v2	Actonel 5mg tablet | treatment/medication code	-0.227332	0.0882083	0.00995914	361141	301
10:89009208:A:G	rs7911226	FAS.5392.73.2		UKB Neale v2	Tea consumed	-0.036876	0.0167813	0.0279902	51427	10349
10:89009208:A:G	rs7911226	FAS.5392.73.2		UKB Neale v2	Sitting height	0.0185085	0.00929587	0.0464768	360066
10:89009208:A:G	rs7911226	FAS.5392.73.2		UKB Neale v2	Glucophage 500mg tablet | treatment/medication code	0.202556	0.0845456	0.0165815	361141	328
10:89009208:A:G	rs7911226	FAS.5392.73.2		UKB Neale v2	Reticulocyte count	-0.000257188	0.000101469	0.0112568	344729
10:89009208:A:G	rs7911226	FAS.5392.73.2		UKB Neale v2	No | ever had laser treatment for glaucoma or high eye pressure	-0.236781	0.111681	0.0340332	5788	191
10:89009208:A:G	rs7911226	FAS.5392.73.2		UKB Neale v2	Bread intake	0.047506	0.020975	0.02352	353030
10:89009208:A:G	rs7911226	FAS.5392.73.2		UKB SAIGE	Hemoptysis	0.0764	0.0337006	0.0234	408867	2073
10:89009208:A:G	rs7911226	FAS.5392.73.2		UKB Neale v2	Powdered milk | type milk consumed	-0.22509	0.101742	0.0269429	51427	227
10:89009208:A:G	rs7911226	FAS.5392.73.2		UKB Neale v2	Financial difficulties | illness, injury, bereavement, stress in last 2 years	0.0209821	0.00792501	0.00810636	358836	40670
10:89009208:A:G	rs7911226	FAS.5392.73.2	PMID:27863252	Astle WJ	High light scatter reticulocyte percentage of red cells	-0.00955765	0.00387773	0.01371	170763
10:89009208:A:G	rs7911226	FAS.5392.73.2	PMID:27863252	Astle WJ	Mean corpuscular hemoglobin concentration	-0.0100402	0.00374827	0.007393	172851
10:89009208:A:G	rs7911226	FAS.5392.73.2		UKB Neale v2	Past tobacco smoking	-0.00743237	0.00328441	0.023641	332141
10:89009208:A:G	rs7911226	FAS.5392.73.2		UKB Neale v2	Been in serious accident believed to be life-threatening	0.0393966	0.0150683	0.00893514	117922	11325
10:89009208:A:G	rs7911226	FAS.5392.73.2		UKB Neale v2	Private healthcare	-0.00635468	0.00293656	0.0304672	119300
10:89009208:A:G	rs7911226	FAS.5392.73.2		UKB Neale v2	Eosinophill count	-0.00443453	0.00190124	0.0196782	349856
10:89009208:A:G	rs7911226	FAS.5392.73.2		UKB Neale v2	Pleurisy | non-cancer illness code, self-reported	0.133741	0.0438933	0.00231145	361141	1220
10:89009208:A:G	rs7911226	FAS.5392.73.2		UKB Neale v2	Signal-to-noise-ratio (snr) of triplet (right)	0.0175408	0.00856577	0.0405837	116755
10:89009208:A:G	rs7911226	FAS.5392.73.2		UKB Neale v2	Weight, manual entry	0.828559	0.348071	0.0173278	5278
10:89009208:A:G	rs7911226	FAS.5392.73.2		UKB Neale v2	Particulate matter air pollution (pm10); 2007	0.0136367	0.00680347	0.04503	355245
10:89009208:A:G	rs7911226	FAS.5392.73.2		UKB Neale v2	Soft cheese intake	-0.00542397	0.0022571	0.0162613	51427
10:89009208:A:G	rs7911226	FAS.5392.73.2		UKB Neale v2	Nitrogen dioxide air pollution; 2006	0.0485342	0.0220866	0.0279893	356078
10:89009208:A:G	rs7911226	FAS.5392.73.2		UKB Neale v2	Painful gums | mouth/teeth dental problems	-0.043891	0.0154253	0.00443532	359841	10115
10:89009208:A:G	rs7911226	FAS.5392.73.2		UKB Neale v2	Creatinine (enzymatic) in urine	28.0015	14.0295	0.0459463	350812
10:89009208:A:G	rs7911226	FAS.5392.73.2	PMID:27863252	Astle WJ	Neutrophil percentage of granulocytes	0.0087138	0.00387187	0.02441	170672
10:89009208:A:G	rs7911226	FAS.5392.73.2		UKB Neale v2	Zinc | mineral and other dietary supplements	-0.0286386	0.0130079	0.0276887	360016	14402
10:89009208:A:G	rs7911226	FAS.5392.73.2		UKB Neale v2	High light scatter reticulocyte count	-8.85987e-05	2.65557e-05	0.000849004	344729
10:89009208:A:G	rs7911226	FAS.9459.7.3	PMID:27863252	Astle WJ	High light scatter reticulocyte count	-0.00911758	0.00387793	0.01872	170761
10:89009208:A:G	rs7911226	FAS.9459.7.3		UKB SAIGE	Ulcerative colitis	0.0691	0.0274005	0.0118	337978	3195
10:89009208:A:G	rs7911226	FAS.9459.7.3		UKB Neale v2	Fexofenadine | treatment/medication code	0.0976771	0.0453025	0.0310729	361141	1145
10:89009208:A:G	rs7911226	FAS.9459.7.3		UKB SAIGE	Calculus of ureter	0.0739	0.0314006	0.0187	403422	2417
10:89009208:A:G	rs7911226	FAS.9459.7.3		UKB Neale v2	Eosinophill percentage	-0.019217	0.00475151	5.24669e-05	349861
10:89009208:A:G	rs7911226	FAS.9459.7.3		UKB SAIGE	Second degree av block	-0.17	0.0721013	0.0185	381372	453
10:89009208:A:G	rs7911226	FAS.9459.7.3		UKB SAIGE	Other peripheral nerve disorders	-0.0314	0.0142003	0.0266	406659	12592
10:89009208:A:G	rs7911226	FAS.9459.7.3		UKB Neale v2	No | job involved shift work	-0.0456386	0.0223795	0.041419	91149	4943
10:89009208:A:G	rs7911226	FAS.9459.7.3		UKB Neale v2	None of the above | medication for pain relief, constipation, heartburn	0.0117944	0.00512244	0.0213052	357084	159041
10:89009208:A:G	rs7911226	FAS.9459.7.3		UKB Neale v2	Milk added to cereal	-0.057368	0.0271163	0.0343779	51427	22510
10:89009208:A:G	rs7911226	FAS.9459.7.3		UKB SAIGE	Renal failure nos	-0.0866	0.0408007	0.0337	399014	1412
10:89009208:A:G	rs7911226	FAS.9459.7.3	PMID:27863252	Astle WJ	Eosinophil percentage of granulocytes	-0.010999	0.0038714	0.004496	170536
10:89009208:A:G	rs7911226	FAS.9459.7.3		UKB Neale v2	Number of rounds of numeric memory test performed	-0.0133553	0.00672167	0.0469403	37646
10:89009208:A:G	rs7911226	FAS.9459.7.3		UKB Neale v2	Nitrogen dioxide air pollution; 2010	0.0371803	0.0186701	0.0464337	356078
10:89009208:A:G	rs7911226	FAS.9459.7.3		UKB SAIGE	Abnormal sputum	0.0706	0.0329006	0.0319	408961	2167
10:89009208:A:G	rs7911226	FAS.9459.7.3		UKB Neale v2	Autism, asperger's or autistic spectrum disorder | mental health problems ever diagnosed by a professional	0.3039	0.118856	0.0105615	117707	166
10:89009208:A:G	rs7911226	FAS.9459.7.3		UKB Neale v2	Trospium | treatment/medication code	-0.281125	0.113478	0.0132343	361141	182
10:89009208:A:G	rs7911226	FAS.9459.7.3		UKB Neale v2	Multivitamins +/- minerals | vitamin and mineral supplements	-0.0138028	0.00619073	0.0257727	359245	77472
10:89009208:A:G	rs7911226	FAS.9459.7.3		UKB Neale v2	Frusemide | treatment/medication code	0.185676	0.0613008	0.00245391	361141	624
10:89009208:A:G	rs7911226	FAS.9459.7.3		UKB Neale v2	This type of shift pattern was not worked during job | mixture of day and night shifts worked	-0.0637803	0.0198172	0.0012903	25697	8764
10:89009208:A:G	rs7911226	FAS.9459.7.3		UKB Neale v2	Pattern 3 | hair/balding pattern	0.0168626	0.00841868	0.0451752	165649	44304
10:89009208:A:G	rs7911226	FAS.9459.7.3	PMID:27863252	Astle WJ	Sum eosinophil basophil counts	-0.00828178	0.00386347	0.03206	171771
10:89009208:A:G	rs7911226	FAS.9459.7.3		UKB Neale v2	Thyroxine product | treatment/medication code	0.0579157	0.0235557	0.0139441	361141	4246
10:89009208:A:G	rs7911226	FAS.9459.7.3		UKB Neale v2	Adopted mother still alive	0.100597	0.0456562	0.027626	3812	1078
10:89009208:A:G	rs7911226	FAS.9459.7.3		UKB Neale v2	Non-hodgkins lymphoma | cancer code, self-reported	-0.137954	0.0585714	0.0185058	361141	684
10:89009208:A:G	rs7911226	FAS.9459.7.3		UKB SAIGE	Acute renal failure	0.0473	0.0230004	0.0399	402123	4521
10:89009208:A:G	rs7911226	FAS.9459.7.3		UKB SAIGE	Abnormality of gait	0.0752	0.0383007	0.0494	407818	1601
10:89009208:A:G	rs7911226	FAS.9459.7.3		UKB SAIGE	Congenital osteodystrophies	-0.22	0.0735014	0.00272	408268	437
10:89009208:A:G	rs7911226	FAS.9459.7.3		UKB Neale v2	Shift pattern was worked for some (but not all) of job | day shifts worked	-0.126116	0.0379478	0.000890304	25697	1756
10:89009208:A:G	rs7911226	FAS.9459.7.3		UKB Neale v2	Panic attacks | mental health problems ever diagnosed by a professional	0.0389257	0.0195057	0.0459754	117722	6518
10:89009208:A:G	rs7911226	FAS.9459.7.3		UKB Neale v2	Any other phobia (eg disabling fear of heights or spiders) | mental health problems ever diagnosed by a professional	0.0809798	0.0386897	0.0363421	117710	1591
10:89009208:A:G	rs7911226	FAS.9459.7.3	PMID:30053915	Scepanovic P	Anti-herpes simplex virus 1 IgG levels	0.0394866	0.0158511	0.0130182	645
10:89009208:A:G	rs7911226	FAS.9459.7.3		UKB Neale v2	Type of accommodation lived in: A house or bungalow	-0.0204375	0.00873389	0.0192809	360088	33234
10:89009208:A:G	rs7911226	FAS.9459.7.3		UKB Neale v2	Nervous feelings	0.0169905	0.00604811	0.00496568	351829	83120
10:89009208:A:G	rs7911226	FAS.9459.7.3		UKB SAIGE	Melanomas of skin	-0.0698	0.0298005	0.0192	397762	2691
10:89009208:A:G	rs7911226	FAS.9459.7.3		UKB Neale v2	Frequency of needing morning drink of alcohol after heavy drinking session in last year	0.00173683	0.000876219	0.0474622	65099
10:89009208:A:G	rs7911226	FAS.9459.7.3		UKB Neale v2	Nitrogen dioxide air pollution; 2007	0.0523012	0.0254875	0.0401674	356078
10:89009208:A:G	rs7911226	FAS.9459.7.3		UKB Neale v2	Mean reticulocyte volume	0.041856	0.0201518	0.0377994	344728
10:89009208:A:G	rs7911226	FAS.9459.7.3		UKB Neale v2	Rheumatic fever | non-cancer illness code, self-reported	-0.140805	0.0470329	0.00275535	361141	1061
10:89009208:A:G	rs7911226	FAS.9459.7.3		UKB SAIGE	Cellulitis and abscess of trunk	0.143	0.0625011	0.0217	398237	602
10:89009208:A:G	rs7911226	FAS.9459.7.3	PMID:28067908	de Lange KM	Inflammatory bowel disease	0.032	0.0134	0.01711	59957	25042
10:89009208:A:G	rs7911226	FAS.9459.7.3		UKB SAIGE	Systemic lupus erythematosus	-0.206	0.0831015	0.013	401707	342
10:89009208:A:G	rs7911226	FAS.9459.7.3	PMID:27863252	Astle WJ	Reticulocyte count	-0.00968323	0.00388572	0.0127	170641
10:89009208:A:G	rs7911226	FAS.9459.7.3		UKB Neale v2	Ever smoked	0.0144733	0.00518512	0.00524916	359751	141560
10:89009208:A:G	rs7911226	FAS.9459.7.3		UKB Neale v2	Psoriatic arthropathy | non-cancer illness code, self-reported	-0.115261	0.057416	0.0446957	361141	712
10:89009208:A:G	rs7911226	FAS.9459.7.3		UKB Neale v2	Both eyes | which eye(s) affected by hypermetropia (long sight)	0.0704769	0.0355009	0.0471341	15090	2184
10:89009208:A:G	rs7911226	FAS.9459.7.3		UKB Neale v2	Beef intake	0.0105896	0.00523779	0.0432058	51422
10:89009208:A:G	rs7911226	FAS.9459.7.3		UKB SAIGE	Muscular dystrophies and other myopathies	0.145	0.0707013	0.0399	407322	470
10:89009208:A:G	rs7911226	FAS.9459.7.3		UKB Neale v2	3mm strong meridian (left)	-0.01935	0.00865097	0.0253058	75398
10:89009208:A:G	rs7911226	FAS.9459.7.3		UKB Neale v2	None of the above (group 1) | illnesses of mother	-0.0120174	0.00534904	0.0246598	332611	138291
10:89009208:A:G	rs7911226	FAS.9459.7.3		UKB Neale v2	Zirtek allergy 10mg tablet | treatment/medication code	-0.314923	0.145956	0.0309518	361141	110
10:89009208:A:G	rs7911226	FAS.9459.7.3		UKB Neale v2	Gtn - glyceryl trinitrate | treatment/medication code	-0.123736	0.0614356	0.043999	361141	621
10:89009208:A:G	rs7911226	FAS.9459.7.3	PMID:29777097	Marioni RE	Paternal history of Alzheimer's disease	-0.0367205	0.0170041	0.0308106	260279	14338
10:89009208:A:G	rs7911226	FAS.9459.7.3		UKB Neale v2	Cake intake	-0.0145473	0.0045746	0.00147354	51427
10:89009208:A:G	rs7911226	FAS.9459.7.3		UKB SAIGE	Urinary calculus	0.0446	0.0192004	0.0198	407648	6643
10:89009208:A:G	rs7911226	FAS.9459.7.3		UKB SAIGE	Congenital coagulation defects	0.149	0.0706013	0.0351	406754	473
10:89009208:A:G	rs7911226	FAS.9459.7.3		UKB Neale v2	Coffee intake	0.0042282	0.00197629	0.0323984	334659
10:89009208:A:G	rs7911226	FAS.9459.7.3		UKB SAIGE	Cancer of other lymphoid, histiocytic tissue	-0.0781	0.0323006	0.0156	406736	2270
10:89009208:A:G	rs7911226	FAS.9459.7.3		UKB Neale v2	Never | smoking status	-0.0124832	0.00506047	0.0136306	359706	164638
10:89009208:A:G	rs7911226	FAS.9459.7.3		UKB SAIGE	Other congenital musculoskeletal anomalies	-0.165	0.0630012	0.00869	408425	594
10:89009208:A:G	rs7911226	FAS.9459.7.3		UKB SAIGE	Urinary incontinence	-0.0386	0.0168003	0.0213	393786	8856
10:89009208:A:G	rs7911226	FAS.9459.7.3		UKB Neale v2	Shift pattern was worked for whole of job | day shifts worked	-0.043686	0.0221255	0.0483359	25697	6046
10:89009208:A:G	rs7911226	FAS.9459.7.3		UKB Neale v2	3mm strong meridian (right)	-0.0181618	0.00862303	0.0351902	75410
10:89009208:A:G	rs7911226	FAS.9459.7.3		UKB SAIGE	Rosacea	0.254	0.0871016	0.00358	402982	310
10:89009208:A:G	rs7911226	FAS.9459.7.3		UKB Neale v2	Mean platelet (thrombocyte) volume	-0.00554471	0.0027808	0.0461611	350470
10:89009208:A:G	rs7911226	FAS.9459.7.3		UKB Neale v2	Fracture ulna | non-cancer illness code, self-reported	-0.311372	0.140918	0.0271315	361141	118
10:89009208:A:G	rs7911226	FAS.9459.7.3		UKB Neale v2	Aprovel 75mg tablet | treatment/medication code	-0.190513	0.0868189	0.0282066	361141	311
10:89009208:A:G	rs7911226	FAS.9459.7.3		UKB Neale v2	Arithmetic sequence recognition | fi10	0.0670299	0.0262488	0.0106657	20880	4159
10:89009208:A:G	rs7911226	FAS.9459.7.3	PMID:29083406	Ferreira MA	Allergic disease (asthma, hay fever or eczema)	0.0131	0.0062	0.03477	360838	180129
10:89009208:A:G	rs7911226	FAS.9459.7.3		UKB Neale v2	3mm asymmetry index (right)	0.0806225	0.0395488	0.0414975	74038
10:89009208:A:G	rs7911226	FAS.9459.7.3		UKB Neale v2	Vitamin b compound tablet | treatment/medication code	0.0615494	0.0300038	0.0402261	361141	2619
10:89009208:A:G	rs7911226	FAS.9459.7.3	PMID:29292387	Turley P	Neuroticism	0.006	0.003	0.0283	168105
10:89009208:A:G	rs7911226	FAS.9459.7.3		UKB SAIGE	Acidosis	0.0926	0.0472009	0.05	402561	1055
10:89009208:A:G	rs7911226	FAS.9459.7.3		UKB Neale v2	Prozac 20mg capsule | treatment/medication code	-0.15121	0.0691046	0.0286585	361141	491
10:89009208:A:G	rs7911226	FAS.9459.7.3		UKB Neale v2	6mm weak meridian (right)	-0.0206575	0.00884532	0.0195245	66256
10:89009208:A:G	rs7911226	FAS.9459.7.3		UKB Neale v2	6mm strong meridian (right)	-0.0250281	0.00903375	0.00559847	66256
10:89009208:A:G	rs7911226	FAS.9459.7.3		UKB Neale v2	Metoclopramide | treatment/medication code	-0.165022	0.0729279	0.0236454	361141	441
10:89009208:A:G	rs7911226	FAS.9459.7.3		UKB Neale v2	Not performed - other reason | oct measured (right)	-0.0753957	0.0332584	0.0233939	54608	2207
10:89009208:A:G	rs7911226	FAS.9459.7.3		UKB Neale v2	Cereal intake	-0.00552655	0.0021707	0.0108979	345019
10:89009208:A:G	rs7911226	FAS.9459.7.3		UKB Neale v2	Time employed in main current job	0.0765229	0.0360933	0.0339953	194087
10:89009208:A:G	rs7911226	FAS.9459.7.3		UKB SAIGE	Melanomas of skin, dx or hx	-0.0698	0.0298005	0.0192	397762	2691
10:89009208:A:G	rs7911226	FAS.9459.7.3	PMID:29662059	Howard DM	Major depressive disorder (ICD-10 coded)	-0.0016036	0.00062854	0.0107325	217584	8276
10:89009208:A:G	rs7911226	FAS.9459.7.3		UKB SAIGE	Diseases of hard tissues of teeth	-0.0615	0.0278005	0.0267	401227	3091
10:89009208:A:G	rs7911226	FAS.9459.7.3		UKB Neale v2	Mean sphered cell volume	0.0424863	0.0136347	0.00183314	344729
10:89009208:A:G	rs7911226	FAS.9459.7.3		UKB Neale v2	High blood pressure | illnesses of father	0.0132955	0.0064071	0.0379726	315021	71136
10:89009208:A:G	rs7911226	FAS.9459.7.3		UKB SAIGE	Foreign body injury	0.145	0.0442008	0.00103	408961	1210
10:89009208:A:G	rs7911226	FAS.9459.7.3		UKB SAIGE	Cerebral edema and compression of brain	0.187	0.0954018	0.05	395467	258
10:89009208:A:G	rs7911226	FAS.9459.7.3	PMID:30053915	Scepanovic P	Anti-rubella virus IgG levels	0.0399847	0.0179499	0.0261502	935
10:89009208:A:G	rs7911226	FAS.9459.7.3		UKB Neale v2	Wears glasses or contact lenses	-0.01607	0.0074688	0.0314247	360677	38909
10:89009208:A:G	rs7911226	FAS.9459.7.3		UKB Neale v2	Age diabetes diagnosed	-0.257279	0.126792	0.0424597	16166
10:89009208:A:G	rs7911226	FAS.9459.7.3		UKB Neale v2	6mm strong meridian (left)	-0.0218159	0.00909052	0.0164045	65551
10:89009208:A:G	rs7911226	FAS.9459.7.3	PMID:27863252	Astle WJ	Eosinophil counts	-0.0106219	0.0038592	0.005917	172275
10:89009208:A:G	rs7911226	FAS.9459.7.3		UKB SAIGE	Dental caries	-0.0618	0.0279005	0.0269	401187	3051
10:89009208:A:G	rs7911226	FAS.9459.7.3	PMID:30220432	Haas ME	Urinary albumin excretion	-0.00375351	0.0018028	0.0373396	382500
10:89009208:A:G	rs7911226	FAS.9459.7.3		UKB SAIGE	Symptoms concerning nutrition, metabolism, and development	0.0475	0.0210004	0.0237	408961	5512
10:89009208:A:G	rs7911226	FAS.9459.7.3		UKB Neale v2	Adizem-xl plus m/r capsule | treatment/medication code	-0.257955	0.0947561	0.00648225	361141	261
10:89009208:A:G	rs7911226	FAS.9459.7.3	PMID:28067908	de Lange KM	Ulcerative colitis	0.0433	0.0171	0.01119	45975	12366
10:89009208:A:G	rs7911226	FAS.9459.7.3		UKB Neale v2	Round of numeric memory test	-0.013599	0.00672485	0.0431627	37575
10:89009208:A:G	rs7911226	FAS.9459.7.3		UKB Neale v2	Felt distant from other people in past month	0.0156649	0.00619627	0.0114703	52822
10:89009208:A:G	rs7911226	FAS.9459.7.3		UKB Neale v2	Skin colour	0.00330895	0.00148209	0.0255742	356530
10:89009208:A:G	rs7911226	FAS.9459.7.3		UKB SAIGE	Glomerulonephritis	-0.102	0.0478009	0.0335	398635	1033
10:89009208:A:G	rs7911226	FAS.9459.7.3		UKB SAIGE	Other infectious and parasitic diseases	0.266	0.107002	0.013	408634	205
10:89009208:A:G	rs7911226	FAS.9459.7.3		UKB SAIGE	Myopathy	0.169	0.0808015	0.0362	407211	359
10:89009208:A:G	rs7911226	FAS.9459.7.3		UKB Neale v2	Budesonide | treatment/medication code	0.113658	0.0555368	0.0407007	361141	761
10:89009208:A:G	rs7911226	FAS.9459.7.3		UKB Neale v2	Spherical power (right)	0.0343625	0.0152825	0.0245484	77983
10:89009208:A:G	rs7911226	FAS.9459.7.3		UKB Neale v2	Betahistine | treatment/medication code	-0.0923326	0.046907	0.0490167	361141	1067
10:89009208:A:G	rs7911226	FAS.9459.7.3		UKB Neale v2	Agoraphobia | mental health problems ever diagnosed by a professional	0.184889	0.0710203	0.009232	117707	468
10:89009208:A:G	rs7911226	FAS.9459.7.3	PMID:28887542	Prins BP	Serum albumin level	0.09	0.04	0.0196701	9824
10:89009208:A:G	rs7911226	FAS.9459.7.3		UKB Neale v2	Frequency of other exercises in last 4 weeks	0.00901417	0.00458753	0.0494239	172505
10:89009208:A:G	rs7911226	FAS.9459.7.3		UKB SAIGE	Cholecystitis without cholelithiasis	-0.0586	0.0294005	0.0466	394068	2761
10:89009208:A:G	rs7911226	FAS.9459.7.3		UKB Neale v2	Low forceps, not breech | delivery methods	0.209664	0.100513	0.0370128	8019	238
10:89009208:A:G	rs7911226	FAS.9459.7.3		UKB Neale v2	Dyspepsia / indigestion | non-cancer illness code, self-reported	-0.202826	0.0717943	0.00472597	361141	455
10:89009208:A:G	rs7911226	FAS.9459.7.3		UKB SAIGE	Jaw disease nos	-0.198	0.100002	0.0482	398370	234
10:89009208:A:G	rs7911226	FAS.9459.7.3		UKB SAIGE	Chronic glomerulonephritis, nos	-0.124	0.052801	0.0191	398447	845
10:89009208:A:G	rs7911226	FAS.9459.7.3		UKB SAIGE	Gastritis and duodenitis, nos	-0.393	0.138003	0.00436	378244	120
10:89009208:A:G	rs7911226	FAS.9459.7.3		UKB Neale v2	No | major dietary changes in the last 5 years	0.01032	0.00522916	0.0484299	360294	138926
10:89009208:A:G	rs7911226	FAS.9459.7.3		UKB Neale v2	Ankylosing spondylitis | non-cancer illness code, self-reported	-0.125792	0.047565	0.00817715	361141	1038
10:89009208:A:G	rs7911226	FAS.9459.7.3		UKB SAIGE	Nonsenile cataract	0.398	0.183003	0.0301	388679	70
10:89009208:A:G	rs7911226	FAS.9459.7.3		UKB Neale v2	Both eyes | ever had laser treatment for glaucoma or high eye pressure	0.283002	0.130763	0.0304837	5788	138
10:89009208:A:G	rs7911226	FAS.9459.7.3		UKB SAIGE	Malaise and fatigue	-0.0526	0.0264005	0.0465	408961	3429
10:89009208:A:G	rs7911226	FAS.9459.7.3		UKB Neale v2	Gabapentin | treatment/medication code	-0.0821824	0.0374937	0.0283841	361141	1674
10:89009208:A:G	rs7911226	FAS.9459.7.3		UKB Neale v2	Piriton 4mg tablet | treatment/medication code	0.135018	0.0642709	0.0356594	361141	568
10:89009208:A:G	rs7911226	FAS.9459.7.3		UKB Neale v2	Ever had eye surgery	0.0514163	0.0208183	0.0135201	79912	5825
10:89009208:A:G	rs7911226	FAS.9459.7.3		UKB Neale v2	Oxytetracycline | treatment/medication code	-0.104761	0.0467433	0.0250111	361141	1075
10:89009208:A:G	rs7911226	FAS.9459.7.3	PMID:27863252	Astle WJ	Eosinophil percentage of white cells	-0.0124764	0.00385473	0.001209	172378
10:89009208:A:G	rs7911226	FAS.9459.7.3		UKB Neale v2	Able to pay rent/mortgage as an adult	-0.0106894	0.00372507	0.00411092	116296
10:89009208:A:G	rs7911226	FAS.9459.7.3		UKB Neale v2	Celecoxib | treatment/medication code	-0.168271	0.0779377	0.0308438	361141	386
10:89009208:A:G	rs7911226	FAS.9459.7.3		UKB Neale v2	Sarcoidosis | non-cancer illness code, self-reported	-0.117189	0.0577001	0.0422513	361141	705
10:89009208:A:G	rs7911226	FAS.9459.7.3		UKB SAIGE	Nontoxic uninodular goiter	0.139	0.0705013	0.0495	391901	472
10:89009208:A:G	rs7911226	FAS.9459.7.3		UKB Neale v2	Spasmonal 60mg capsule | treatment/medication code	-0.20512	0.094407	0.0297995	361141	263
10:89009208:A:G	rs7911226	FAS.9459.7.3		UKB Neale v2	Public transport | types of transport used (excluding work)	-0.0143368	0.0054597	0.00864025	359324	107727
10:89009208:A:G	rs7911226	FAS.9459.7.3		UKB Neale v2	Astigmatism angle (right)	-0.638681	0.279363	0.0222451	77983
10:89009208:A:G	rs7911226	FAS.9459.7.3		UKB Neale v2	Elective caesarean section | delivery methods	0.105519	0.0485355	0.0297273	8019	1157
10:89009208:A:G	rs7911226	FAS.9459.7.3		UKB SAIGE	Allergic purpura	-0.442	0.215004	0.0394	406332	51
10:89009208:A:G	rs7911226	FAS.9459.7.3		UKB Neale v2	Morning/evening person (chronotype)	0.00696178	0.00249456	0.0052583	322488
10:89009208:A:G	rs7911226	FAS.9459.7.3	PMID:27863252	Astle WJ	Reticulocyte fraction of red cells	-0.0100366	0.00388335	0.009751	170690
10:89009208:A:G	rs7911226	FAS.9459.7.3		UKB Neale v2	Rarely/never | worked with paints, thinners or glues	-0.0549964	0.0264608	0.0376714	90389	3593
10:89009208:A:G	rs7911226	FAS.9459.7.3		UKB Neale v2	Time spend outdoors in summer	-0.00609744	0.0023173	0.00850708	327717
10:89009208:A:G	rs7911226	FAS.9459.7.3		UKB SAIGE	Chromosomal anomalies	-0.43	0.155003	0.00542	408036	99
10:89009208:A:G	rs7911226	FAS.9459.7.3		UKB SAIGE	Benign neoplasm of spinal cord, meninges	-0.453	0.200004	0.0234	407298	59
10:89009208:A:G	rs7911226	FAS.9459.7.3	PMID:29273806	Demenais F	Asthma	0.0282906	0.0138617	0.0412597	127669	19954
10:89009208:A:G	rs7911226	FAS.9459.7.3	PMID:27089181	Okbay A	Depression	0.009	0.004	0.02488	75306	16471
10:89009208:A:G	rs7911226	FAS.9459.7.3		UKB SAIGE	Disorder of skin and subcutaneous tissue nos	0.045	0.0202004	0.026	408961	5782
10:89009208:A:G	rs7911226	FAS.9459.7.3		UKB Neale v2	Vitamin d | vitamin and/or mineral supplement use	0.078652	0.0382145	0.0395745	51427	1638
10:89009208:A:G	rs7911226	FAS.9459.7.3		UKB Neale v2	Heart disease | illnesses of mother	0.0150578	0.00651845	0.0208854	332966	66343
10:89009208:A:G	rs7911226	FAS.9459.7.3	PMID:27089181	Okbay A	Neuroticism	0.008	0.004	0.04936	170911
10:89009208:A:G	rs7911226	FAS.9459.7.3		UKB SAIGE	Anomalies of respiratory system, congenital	0.442	0.215004	0.0397	408638	51
10:89009208:A:G	rs7911226	FAS.9459.7.3		UKB Neale v2	Soya | milk type used	-0.0285598	0.0135625	0.03522	360806	13147
10:89009208:A:G	rs7911226	FAS.9459.7.3		UKB Neale v2	Spherical power (left)	0.0339466	0.0154807	0.0283218	77739
10:89009208:A:G	rs7911226	FAS.9459.7.3	PMID:28194004	Deary V	Self-reported tiredness	0.0120559	0.00464891	0.0095067	108976
10:89009208:A:G	rs7911226	FAS.9459.7.3		UKB SAIGE	Other diseases of lung	0.114	0.054901	0.0372	408961	781
10:89009208:A:G	rs7911226	FAS.9459.7.3	PMID:29343764	Jiang X	Vitamin D levels	-0.0059	0.0023	0.01046	79366
10:89009208:A:G	rs7911226	FAS.9459.7.3		UKB Neale v2	Yes, during the last year | ever been injured or injured someone else through drinking alcohol	0.137943	0.0654417	0.0350402	118002	552
10:89009208:A:G	rs7911226	FAS.9459.7.3		UKB Neale v2	Dupuytren's contracture | non-cancer illness code, self-reported	-0.1849	0.0940348	0.0492626	361141	265
10:89009208:A:G	rs7911226	FAS.9459.7.3		UKB Neale v2	Actonel 5mg tablet | treatment/medication code	-0.227332	0.0882083	0.00995914	361141	301
10:89009208:A:G	rs7911226	FAS.9459.7.3		UKB Neale v2	Tea consumed	-0.036876	0.0167813	0.0279902	51427	10349
10:89009208:A:G	rs7911226	FAS.9459.7.3		UKB Neale v2	Sitting height	0.0185085	0.00929587	0.0464768	360066
10:89009208:A:G	rs7911226	FAS.9459.7.3		UKB Neale v2	Glucophage 500mg tablet | treatment/medication code	0.202556	0.0845456	0.0165815	361141	328
10:89009208:A:G	rs7911226	FAS.9459.7.3		UKB Neale v2	Reticulocyte count	-0.000257188	0.000101469	0.0112568	344729
10:89009208:A:G	rs7911226	FAS.9459.7.3		UKB Neale v2	No | ever had laser treatment for glaucoma or high eye pressure	-0.236781	0.111681	0.0340332	5788	191
10:89009208:A:G	rs7911226	FAS.9459.7.3		UKB Neale v2	Bread intake	0.047506	0.020975	0.02352	353030
10:89009208:A:G	rs7911226	FAS.9459.7.3		UKB SAIGE	Hemoptysis	0.0764	0.0337006	0.0234	408867	2073
10:89009208:A:G	rs7911226	FAS.9459.7.3		UKB Neale v2	Powdered milk | type milk consumed	-0.22509	0.101742	0.0269429	51427	227
10:89009208:A:G	rs7911226	FAS.9459.7.3		UKB Neale v2	Financial difficulties | illness, injury, bereavement, stress in last 2 years	0.0209821	0.00792501	0.00810636	358836	40670
10:89009208:A:G	rs7911226	FAS.9459.7.3	PMID:27863252	Astle WJ	High light scatter reticulocyte percentage of red cells	-0.00955765	0.00387773	0.01371	170763
10:89009208:A:G	rs7911226	FAS.9459.7.3	PMID:27863252	Astle WJ	Mean corpuscular hemoglobin concentration	-0.0100402	0.00374827	0.007393	172851
10:89009208:A:G	rs7911226	FAS.9459.7.3		UKB Neale v2	Past tobacco smoking	-0.00743237	0.00328441	0.023641	332141
10:89009208:A:G	rs7911226	FAS.9459.7.3		UKB Neale v2	Been in serious accident believed to be life-threatening	0.0393966	0.0150683	0.00893514	117922	11325
10:89009208:A:G	rs7911226	FAS.9459.7.3		UKB Neale v2	Private healthcare	-0.00635468	0.00293656	0.0304672	119300
10:89009208:A:G	rs7911226	FAS.9459.7.3		UKB Neale v2	Eosinophill count	-0.00443453	0.00190124	0.0196782	349856
10:89009208:A:G	rs7911226	FAS.9459.7.3		UKB Neale v2	Pleurisy | non-cancer illness code, self-reported	0.133741	0.0438933	0.00231145	361141	1220
10:89009208:A:G	rs7911226	FAS.9459.7.3		UKB Neale v2	Signal-to-noise-ratio (snr) of triplet (right)	0.0175408	0.00856577	0.0405837	116755
10:89009208:A:G	rs7911226	FAS.9459.7.3		UKB Neale v2	Weight, manual entry	0.828559	0.348071	0.0173278	5278
10:89009208:A:G	rs7911226	FAS.9459.7.3		UKB Neale v2	Particulate matter air pollution (pm10); 2007	0.0136367	0.00680347	0.04503	355245
10:89009208:A:G	rs7911226	FAS.9459.7.3		UKB Neale v2	Soft cheese intake	-0.00542397	0.0022571	0.0162613	51427
10:89009208:A:G	rs7911226	FAS.9459.7.3		UKB Neale v2	Nitrogen dioxide air pollution; 2006	0.0485342	0.0220866	0.0279893	356078
10:89009208:A:G	rs7911226	FAS.9459.7.3		UKB Neale v2	Painful gums | mouth/teeth dental problems	-0.043891	0.0154253	0.00443532	359841	10115
10:89009208:A:G	rs7911226	FAS.9459.7.3		UKB Neale v2	Creatinine (enzymatic) in urine	28.0015	14.0295	0.0459463	350812
10:89009208:A:G	rs7911226	FAS.9459.7.3	PMID:27863252	Astle WJ	Neutrophil percentage of granulocytes	0.0087138	0.00387187	0.02441	170672
10:89009208:A:G	rs7911226	FAS.9459.7.3		UKB Neale v2	Zinc | mineral and other dietary supplements	-0.0286386	0.0130079	0.0276887	360016	14402
10:89009208:A:G	rs7911226	FAS.9459.7.3		UKB Neale v2	High light scatter reticulocyte count	-8.85987e-05	2.65557e-05	0.000849004	344729
12:112919388:G:A	rs10774671	OAS1.10361.25.3		UKB SAIGE	Keratoderma, acquired	-0.469	0.159003	0.00325	403962	87
12:112919388:G:A	rs10774671	OAS1.10361.25.3		UKB Neale v2	Fracture skull / head | non-cancer illness code, self-reported	-0.182605	0.0904865	0.0435844	361141	268
12:112919388:G:A	rs10774671	OAS1.10361.25.3		UKB Neale v2	Other abdominal problem | non-cancer illness code, self-reported	0.147863	0.0721312	0.0403698	361141	422
12:112919388:G:A	rs10774671	OAS1.10361.25.3		UKB SAIGE	Other hypertrophic cardiomyopathy	0.284	0.116002	0.0142	405942	163
12:112919388:G:A	rs10774671	OAS1.10361.25.3		UKB Neale v2	Used an inhaler for chest within last hour	-0.0678138	0.0301644	0.0245654	331625	2424
12:112919388:G:A	rs10774671	OAS1.10361.25.3		UKB SAIGE	Other abnormality of urination	-0.0716	0.0340006	0.0353	386856	1926
12:112919388:G:A	rs10774671	OAS1.10361.25.3		UKB Neale v2	Rabeprazole sodium | treatment/medication code	-0.124646	0.0573736	0.0298125	361141	667
12:112919388:G:A	rs10774671	OAS1.10361.25.3		UKB Neale v2	Chronic lymphocytic | cancer code, self-reported	-0.199261	0.0962124	0.0383507	361141	237
12:112919388:G:A	rs10774671	OAS1.10361.25.3		UKB Neale v2	Terazosin | treatment/medication code	-0.279588	0.13139	0.0333414	361141	127
12:112919388:G:A	rs10774671	OAS1.10361.25.3		UKB Neale v2	Iron sulphate | treatment/medication code	-0.325937	0.113595	0.0041135	361141	170
12:112919388:G:A	rs10774671	OAS1.10361.25.3		UKB Neale v2	Lymecycline | treatment/medication code	-0.273499	0.109495	0.0124948	361141	183
12:112919388:G:A	rs10774671	OAS1.10361.25.3		UKB Neale v2	Speech-reception-threshold (srt) estimate (left)	-0.0187925	0.00839131	0.0251243	114811
12:112919388:G:A	rs10774671	OAS1.10361.25.3	PMID:27863252	Astle WJ	Sum eosinophil basophil counts	-0.0113334	0.00372219	0.002328	171771
12:112919388:G:A	rs10774671	OAS1.10361.25.3		UKB Neale v2	Pariet 10mg e/c tablet | treatment/medication code	-0.278672	0.0958065	0.00362904	361141	239
12:112919388:G:A	rs10774671	OAS1.10361.25.3		UKB Neale v2	Minocycline | treatment/medication code	-0.338242	0.116732	0.00376003	361141	161
12:112919388:G:A	rs10774671	OAS1.10361.25.3		UKB Neale v2	Co-enzyme q10/ubiquinone/bio-quinone/coenzyme q10 | treatment/medication code	-0.0901855	0.0423521	0.0332166	361141	1226
12:112919388:G:A	rs10774671	OAS1.10361.25.3		UKB SAIGE	Other dyspnea	0.114	0.0492009	0.0199	400745	912
12:112919388:G:A	rs10774671	OAS1.10361.25.3		UKB Neale v2	Heart disease | illnesses of adopted mother	0.13051	0.0622727	0.0361855	3004	697
12:112919388:G:A	rs10774671	OAS1.10361.25.3		UKB Neale v2	Amlodipine | treatment/medication code	0.025052	0.0123885	0.0431522	361141	14588
12:112919388:G:A	rs10774671	OAS1.10361.25.3		UKB SAIGE	Aneurysm of iliac artery	-0.516	0.151003	0.000638	400693	98
12:112919388:G:A	rs10774671	OAS1.10361.25.3		UKB Neale v2	Probable recurrent major depression (moderate) | bipolar and major depression status	0.0300969	0.0149948	0.0447332	86895	10902
12:112919388:G:A	rs10774671	OAS1.10361.25.3		UKB Neale v2	Serc-8 tablet | treatment/medication code	-0.393652	0.141219	0.00531076	361141	110
12:112919388:G:A	rs10774671	OAS1.10361.25.3		UKB Neale v2	Rarely/never | worked with paints, thinners or glues	0.0666256	0.0254581	0.00886906	90389	3593
12:112919388:G:A	rs10774671	OAS1.10361.25.3		UKB Neale v2	Dihydrocodeine | treatment/medication code	-0.101336	0.0412996	0.0141391	361141	1290
12:112919388:G:A	rs10774671	OAS1.10361.25.3		UKB Neale v2	Retinal detachment | non-cancer illness code, self-reported	-0.088344	0.0424699	0.0375088	361141	1219
12:112919388:G:A	rs10774671	OAS1.10361.25.3		UKB SAIGE	Osteoarthrosis, localized, primary	-0.0399	0.0160003	0.0125	389591	9069
12:112919388:G:A	rs10774671	OAS1.10361.25.3		UKB SAIGE	Congenital hip dysplasia and deformity	-0.305	0.144003	0.0333	407938	107
12:112919388:G:A	rs10774671	OAS1.10361.25.3		UKB Neale v2	Vitamin b12 preparation | treatment/medication code	-0.0906484	0.0443709	0.0410524	361141	1117
12:112919388:G:A	rs10774671	OAS1.10361.25.3	PMID:27863252	Astle WJ	Sum basophil neutrophil counts	-0.00749227	0.00374325	0.04533	170143
12:112919388:G:A	rs10774671	OAS1.10361.25.3		UKB Neale v2	Morphine | treatment/medication code	-0.200842	0.1015	0.0478417	361141	213
12:112919388:G:A	rs10774671	OAS1.10361.25.3		UKB SAIGE	Traumatic cataract	0.362	0.147003	0.0137	388711	102
12:112919388:G:A	rs10774671	OAS1.10361.25.3		UKB SAIGE	Macroglobulinemia	0.397	0.179003	0.0266	408299	69
12:112919388:G:A	rs10774671	OAS1.10361.25.3		UKB Neale v2	Eosinophill count	-0.00704445	0.00184003	0.000128983	349856
12:112919388:G:A	rs10774671	OAS1.10361.25.3	PMID:27863252	Astle WJ	Eosinophil counts	-0.0111585	0.00371765	0.002687	172275
12:112919388:G:A	rs10774671	OAS1.10361.25.3		UKB SAIGE	Disorders resulting from impaired renal function	0.295	0.150003	0.0483	397700	98
12:112919388:G:A	rs10774671	OAS1.10361.25.3		UKB SAIGE	Myoclonus	-0.322	0.152003	0.0345	395304	95
12:112919388:G:A	rs10774671	OAS1.10361.25.3		UKB Neale v2	Dicloflex 25mg e/c tablet | treatment/medication code	0.141634	0.0714567	0.0474647	361141	430
12:112919388:G:A	rs10774671	OAS1.10361.25.3		UKB Neale v2	Losartan | treatment/medication code	-0.0565965	0.0259804	0.0293714	361141	3268
12:112919388:G:A	rs10774671	OAS1.10361.25.3		UKB Neale v2	Number of jobs held	0.0125737	0.00377572	0.000868357	89866
12:112919388:G:A	rs10774671	OAS1.10361.25.3		UKB SAIGE	Other disorders of eye	0.0546	0.0240004	0.0227	405155	3910
12:112919388:G:A	rs10774671	OAS1.10361.25.3		UKB SAIGE	Perforation of tympanic membrane	0.0932	0.0460008	0.0425	405932	1044
12:112919388:G:A	rs10774671	OAS1.10361.25.3		UKB Neale v2	Doctor's advice | reason for reducing amount of alcohol drunk	0.058874	0.0271935	0.0303866	134033	2990
12:112919388:G:A	rs10774671	OAS1.10361.25.3		UKB Neale v2	Yes, toes | surgery/amputation of toe or leg	-0.242101	0.120845	0.0451406	25891	149
12:112919388:G:A	rs10774671	OAS1.10361.25.3		UKB Neale v2	Other type of coffee | coffee type	-0.0472219	0.0215699	0.0285763	283449	4791
12:112919388:G:A	rs10774671	OAS1.10361.25.3		UKB Neale v2	Reductil 10mg capsule | treatment/medication code	-0.497903	0.137508	0.000293558	361141	116
12:112919388:G:A	rs10774671	OAS1.10361.25.3		UKB SAIGE	Polyneuropathy due to drugs	-0.473	0.192004	0.0139	379415	60
12:112919388:G:A	rs10774671	OAS1.10361.25.3		UKB SAIGE	Proliferative glomerulonephritis	0.339	0.166003	0.0417	397681	79
12:112919388:G:A	rs10774671	OAS1.10361.25.3		UKB Neale v2	Manevac granules | treatment/medication code	-0.304715	0.129399	0.0185283	361141	131
12:112919388:G:A	rs10774671	OAS1.10361.25.3		UKB Neale v2	Cycle | types of transport used (excluding work)	-0.0206957	0.00943644	0.0282935	359324	26059
12:112919388:G:A	rs10774671	OAS1.10361.25.3		UKB Neale v2	Eosinophill percentage	-0.0110622	0.00459869	0.01615	349861
12:112919388:G:A	rs10774671	OAS1.10361.25.3		UKB Neale v2	Something else not mentioned | behavioural and miscellaneous addictions	0.145504	0.0706007	0.0393069	116746	441
12:112919388:G:A	rs10774671	OAS1.10361.25.3		UKB Neale v2	Hip circumference	0.0783153	0.0225155	0.000504688	360521
12:112919388:G:A	rs10774671	OAS1.10361.25.3	PMID:30053915	Scepanovic P	Anti-Epstein-Barr virus viral capsid antigen (VCA) IgG levels	0.0727723	0.0227371	0.00141938	956
12:112919388:G:A	rs10774671	OAS1.10361.25.3		UKB Neale v2	Pravastatin | treatment/medication code	-0.0791888	0.0356762	0.0264399	361141	1726
12:112919388:G:A	rs10774671	OAS1.10361.25.3		UKB Neale v2	Felt hated by family member as a child	-0.00895736	0.00321726	0.0053675	117749
12:112919388:G:A	rs10774671	OAS1.10361.25.3	PMID:29273806	Demenais F	Asthma	0.0335278	0.013306	0.0117436	127669	19954
12:112919388:G:A	rs10774671	OAS1.10361.25.3	PMID:21173776	de Moor MH	Neuroticism	-0.2017	0.1	0.04372	17375
12:112919388:G:A	rs10774671	OAS1.10361.25.3	PMID:30053915	Scepanovic P	Anti-hepatitis B virus core antigen (HBc) IgG levels	0.0576429	0.0235499	0.0147359	15
12:112919388:G:A	rs10774671	OAS1.10361.25.3	PMID:26394269	Cordell HJ	Primary biliary cholangitis	-0.0855353	0.0336018	0.010909	13239	2764
12:112919388:G:A	rs10774671	OAS1.10361.25.3		UKB Neale v2	Methotrexate | treatment/medication code	-0.0772679	0.0338929	0.0226197	361141	1918
12:112919388:G:A	rs10774671	OAS1.10361.25.3		UKB SAIGE	Chondrocalcinosis	0.149	0.0628012	0.0179	405758	560
12:112919388:G:A	rs10774671	OAS1.10361.25.3		UKB Neale v2	Simvador 10mg tablet | treatment/medication code	-0.177741	0.0651075	0.00633346	361141	517
12:112919388:G:A	rs10774671	OAS1.10361.25.3		UKB Neale v2	Ever had prolonged feelings of sadness or depression	0.0219228	0.00847578	0.00969499	117763	53389
12:112919388:G:A	rs10774671	OAS1.10361.25.3		UKB Neale v2	Heart disease | illnesses of adopted siblings	-0.207163	0.0968895	0.0326382	1860	202
12:112919388:G:A	rs10774671	OAS1.10361.25.3		UKB Neale v2	Butter/spreadable butter | spread type	-0.0102311	0.0051134	0.0454055	360291	131190
12:112919388:G:A	rs10774671	OAS1.10361.25.3		UKB SAIGE	Late effects of cerebrovascular disease	0.146	0.0419008	0.000511	400280	1263
12:112919388:G:A	rs10774671	OAS1.10361.25.3		UKB Neale v2	Renal failure requiring dialysis | non-cancer illness code, self-reported	-0.238982	0.1101	0.0299602	361141	181
12:112919388:G:A	rs10774671	OAS1.10361.25.3		UKB Neale v2	20 to less-than-30 hours | work hours - lumped category	0.0278658	0.0129283	0.0311301	75177	15156
12:112919388:G:A	rs10774671	OAS1.10361.25.3		UKB Neale v2	Arm fat percentage (right)	0.0645178	0.0184658	0.000476043	354760
12:112919388:G:A	rs10774671	OAS1.10361.25.3		UKB Neale v2	Body fat percentage	0.0554943	0.015639	0.000387558	354628
12:112919388:G:A	rs10774671	OAS1.10361.25.3		UKB Neale v2	Recent feelings of foreboding	0.00639673	0.00237411	0.00705321	117474
12:112919388:G:A	rs10774671	OAS1.10361.25.3		UKB Neale v2	Non-infective hepatitis | non-cancer illness code, self-reported	-0.179906	0.0766167	0.0188662	361141	374
12:112919388:G:A	rs10774671	OAS1.10361.25.3		UKB Neale v2	Oramorph 10mg/5ml oral solution | treatment/medication code	-0.307942	0.138724	0.0264285	361141	114
12:112919388:G:A	rs10774671	OAS1.10361.25.3		UKB Neale v2	Epilepsy | non-cancer illness code, self-reported	-0.0555346	0.0270825	0.0403058	361141	3015
12:112919388:G:A	rs10774671	OAS1.10361.25.3		UKB Neale v2	Duration of moderate activity	-0.00475065	0.0023752	0.0454903	268826
12:112919388:G:A	rs10774671	OAS1.10361.25.3	PMID:27863252	Astle WJ	White blood cell count	-0.0108401	0.00373818	0.003733	172435
12:112919388:G:A	rs10774671	OAS1.10361.25.3		UKB Neale v2	Ursodeoxycholic acid | treatment/medication code	-0.322704	0.130912	0.0136983	361141	128
12:112919388:G:A	rs10774671	OAS1.10361.25.3		UKB Neale v2	Often | workplace very hot	0.032545	0.0154475	0.0351331	90165	10169
12:112919388:G:A	rs10774671	OAS1.10361.25.3		UKB Neale v2	Psoriasis | non-cancer illness code, self-reported	-0.0520819	0.0230017	0.0235563	361141	4192
12:112919388:G:A	rs10774671	OAS1.10361.25.3		UKB Neale v2	Waist circumference	0.064831	0.0292891	0.0268646	360564
12:112919388:G:A	rs10774671	OAS1.10361.25.3		UKB Neale v2	Answered sexual history questions	-0.0179451	0.00886735	0.0429954	361015	29611
12:112919388:G:A	rs10774671	OAS1.10361.25.3		UKB Neale v2	Cozaar 25mg tablet | treatment/medication code	-0.143296	0.0728117	0.0490596	361141	414
12:112919388:G:A	rs10774671	OAS1.10361.25.3		UKB Neale v2	Pattern 4 | hair/balding pattern	-0.0187077	0.00939677	0.0464946	165649	30225
12:112919388:G:A	rs10774671	OAS1.10361.25.3		UKB Neale v2	Detrusitol 1mg tablet | treatment/medication code	-0.158349	0.06312	0.012117	361141	551
12:112919388:G:A	rs10774671	OAS1.10361.25.3		UKB Neale v2	Blood clot in the leg (dvt) | blood clot, dvt, bronchitis, emphysema, asthma, rhinitis, eczema, allergy diagnosed by doctor	-0.0343056	0.017385	0.0484589	360527	7386
12:112919388:G:A	rs10774671	OAS1.10361.25.3		UKB Neale v2	Naproxen | treatment/medication code	0.0789498	0.0307189	0.010167	361141	2338
12:112919388:G:A	rs10774671	OAS1.10361.25.3		UKB Neale v2	Spells in hospital	-0.00511694	0.00243456	0.035573	236484
12:112919388:G:A	rs10774671	OAS1.10361.25.3		UKB Neale v2	Rarely/never | workplace had a lot of cigarette smoke from other people smoking	0.0285204	0.0137213	0.0376583	90716	13422
12:112919388:G:A	rs10774671	OAS1.10361.25.3		UKB SAIGE	Cerebral edema and compression of brain	0.189	0.0924017	0.0411	395467	258
12:112919388:G:A	rs10774671	OAS1.10361.25.3		UKB Neale v2	Sulfasalazine | treatment/medication code	-0.153079	0.0556264	0.00592401	361141	710
12:112919388:G:A	rs10774671	OAS1.10361.25.3		UKB Neale v2	Reticulocyte count	-0.00030458	9.81992e-05	0.00192461	344729
12:112919388:G:A	rs10774671	OAS1.10361.25.3		UKB Neale v2	Age started smoking in current smokers	-0.141512	0.0508673	0.00540652	27291
12:112919388:G:A	rs10774671	OAS1.10361.25.3		UKB Neale v2	Frequency of other exercises in last 4 weeks	-0.0130119	0.00442841	0.00330084	172505
12:112919388:G:A	rs10774671	OAS1.10361.25.3		UKB Neale v2	Calcium carbonate+colecalciferol 1.25g/5micrograms tablet | treatment/medication code	-0.277987	0.117449	0.0179369	361141	159
12:112919388:G:A	rs10774671	OAS1.10361.25.3		UKB SAIGE	Giant cell arteritis	0.166	0.0753014	0.0274	400983	388
12:112919388:G:A	rs10774671	OAS1.10361.25.3	PMID:27863252	Astle WJ	Plateletcrit	-0.0149884	0.0038103	8.367e-05	164339
12:112919388:G:A	rs10774671	OAS1.10361.25.3		UKB SAIGE	Non-hodgkins lymphoma	0.089	0.0352006	0.0114	406259	1793
12:112919388:G:A	rs10774671	OAS1.10361.25.3	PMID:27989323	Ahola-Olli AV	Monokine induced by gamma interferon levels	-0.0739	0.0264	0.005075	3685
12:112919388:G:A	rs10774671	OAS1.10361.25.3		UKB Neale v2	Nasobec aqueous 50micrograms nasal spray | treatment/medication code	-0.258954	0.118975	0.0295126	361141	155
12:112919388:G:A	rs10774671	OAS1.10361.25.3		UKB Neale v2	None of the above | attendance/disability/mobility allowance	0.0214425	0.0105515	0.0421345	358597	20718
12:112919388:G:A	rs10774671	OAS1.10361.25.3		UKB Neale v2	Bisoprolol fumarate+hydrochlorothiazide 10mg/6.25mg tablet | treatment/medication code	0.276483	0.0968213	0.00429508	361141	234
12:112919388:G:A	rs10774671	OAS1.10361.25.3		UKB SAIGE	Malignant neoplasm of other and ill-defined sites within the digestive organs and peritoneum	0.0408	0.0201004	0.0427	398956	5584
12:112919388:G:A	rs10774671	OAS1.10361.25.3		UKB Neale v2	Magnesium citrate | treatment/medication code	-0.318695	0.126542	0.0117847	361141	137
12:112919388:G:A	rs10774671	OAS1.10361.25.3		UKB Neale v2	Risk taking	-0.0130524	0.0056146	0.0200848	348549	90500
12:112919388:G:A	rs10774671	OAS1.10361.25.3		UKB SAIGE	Valvular heart disease/ heart chambers	-0.25	0.0973018	0.0101	406398	233
12:112919388:G:A	rs10774671	OAS1.10361.25.3		UKB Neale v2	Recent worrying too much about different things	0.00676538	0.00288934	0.0192084	117567
12:112919388:G:A	rs10774671	OAS1.10361.25.3		UKB SAIGE	Tympanosclerosis and middle ear disease related to otitis media	0.235	0.0954018	0.0139	405129	241
12:112919388:G:A	rs10774671	OAS1.10361.25.3		UKB Neale v2	Sodium in urine	0.251865	0.104933	0.0163848	350061
12:112919388:G:A	rs10774671	OAS1.10361.25.3	PMID:29304378	Medina-Gomez C	Total body bone mineral density (age 30-45)	-0.0404	0.0159	0.01111	10062
12:112919388:G:A	rs10774671	OAS1.10361.25.3		UKB Neale v2	Weight	0.102295	0.0348553	0.00333752	354838
12:112919388:G:A	rs10774671	OAS1.10361.25.3		UKB SAIGE	Encephalopathy, not elsewhere classified	0.248	0.0962018	0.01	395446	237
12:112919388:G:A	rs10774671	OAS1.10361.25.3		UKB Neale v2	Rectal cancer | cancer code, self-reported	0.222829	0.0898196	0.0131057	361141	272
12:112919388:G:A	rs10774671	OAS1.10361.25.3		UKB SAIGE	Secondary malignant neoplasm of liver	0.0755	0.0291005	0.00951	373242	2638
12:112919388:G:A	rs10774671	OAS1.10361.25.3	PMID:29942086	Savage JE	Intelligence	-0.00630001	0.00285715	0.02747	269867
12:112919388:G:A	rs10774671	OAS1.10361.25.3		UKB Neale v2	Not performed - other reason | oct measured (left)	0.0617269	0.031269	0.048376	54601	2332
12:112919388:G:A	rs10774671	OAS1.10361.25.3	PMID:27863252	Astle WJ	Platelet count	-0.0117521	0.00379636	0.001964	166066
12:112919388:G:A	rs10774671	OAS1.10361.25.3		UKB Neale v2	Hydroxycarbamide | treatment/medication code	-0.385534	0.116728	0.000957033	361141	161
12:112919388:G:A	rs10774671	OAS1.10361.25.3		UKB Neale v2	Zantac 75 tablet | treatment/medication code	-0.214066	0.104485	0.0404826	361141	201
12:112919388:G:A	rs10774671	OAS1.10361.25.3		UKB Neale v2	Body mass index (bmi)	0.0406467	0.0116618	0.000491368	359983
12:112919388:G:A	rs10774671	OAS1.10361.25.3		UKB SAIGE	Noninfectious disorders of lymphatic channels	-0.13	0.056001	0.0201	408961	705
12:112919388:G:A	rs10774671	OAS1.10361.25.3		UKB Neale v2	Home cooked meals | type of meals eaten	-0.0329683	0.0162274	0.0421912	51427	10385
12:112919388:G:A	rs10774671	OAS1.10361.25.3		UKB Neale v2	Leg pain when walking normally	-0.0441064	0.0186278	0.0179013	25305	10993
12:112919388:G:A	rs10774671	OAS1.10361.25.3		UKB Neale v2	Hearing aid user	0.0298447	0.0143585	0.0376584	219358	10942
12:112919388:G:A	rs10774671	OAS1.10361.25.3		UKB Neale v2	Viscotears liquid eye gel | treatment/medication code	-0.107483	0.051088	0.0353859	361141	841
12:112919388:G:A	rs10774671	OAS1.10361.25.3		UKB Neale v2	Often | workplace very cold	0.0471488	0.017285	0.00637731	90188	7881
12:112919388:G:A	rs10774671	OAS1.10361.25.3		UKB Neale v2	Semiskimmed | type milk consumed	-0.028715	0.0134003	0.0321263	51427	19497
12:112919388:G:A	rs10774671	OAS1.10361.25.3		UKB Neale v2	Ciprofloxacin | treatment/medication code	-0.246737	0.124742	0.0479273	361141	141
12:112919388:G:A	rs10774671	OAS1.10361.25.3		UKB SAIGE	Allergy/adverse effect of penicillin	-0.0268	0.0122002	0.0277	397887	16090
12:112919388:G:A	rs10774671	OAS1.10361.25.3		UKB Neale v2	Liquifilm tears 1.4% eye drops | treatment/medication code	-0.259059	0.120128	0.03104	361141	152
12:112919388:G:A	rs10774671	OAS1.10361.25.3		UKB Neale v2	Adrenocortical insufficiency/addison's disease | non-cancer illness code, self-reported	-0.246918	0.11784	0.0361355	361141	158
12:112919388:G:A	rs10774671	OAS1.10361.25.3		UKB SAIGE	Poisoning by analgesics, antipyretics, and antirheumatics	-0.0392	0.0182003	0.0314	388707	6910
12:112919388:G:A	rs10774671	OAS1.10361.25.3		UKB SAIGE	Dysphagia	-0.037	0.0187003	0.0481	375757	6482
12:112919388:G:A	rs10774671	OAS1.10361.25.3		UKB Neale v2	Dentures | mouth/teeth dental problems	0.0140633	0.00629394	0.0254539	359841	60977
12:112919388:G:A	rs10774671	OAS1.10361.25.3		UKB SAIGE	Other disorders of ear	0.23	0.104002	0.0273	404764	202
12:112919388:G:A	rs10774671	OAS1.10361.25.3		UKB Neale v2	Indapamide | treatment/medication code	-0.098728	0.0436733	0.023782	361141	1152
12:112919388:G:A	rs10774671	OAS1.10361.25.3		UKB SAIGE	Dermatophytosis of nail	-0.334	0.170003	0.0497	406377	76
12:112919388:G:A	rs10774671	OAS1.10361.25.3		UKB Neale v2	Yes | hearing difficulty/problems	0.0121165	0.00561667	0.0309845	346635	90710
12:112919388:G:A	rs10774671	OAS1.10361.25.3		UKB SAIGE	Other diseases of lung	0.116	0.053201	0.0285	408961	781
12:112919388:G:A	rs10774671	OAS1.10361.25.3		UKB Neale v2	White blood cell (leukocyte) count	-0.0202695	0.00507093	6.41081e-05	350470
12:112919388:G:A	rs10774671	OAS1.10361.25.3		UKB SAIGE	Primary biliary cirrhosis	-0.206	0.0930017	0.0267	400309	254
12:112919388:G:A	rs10774671	OAS1.10361.25.3		UKB SAIGE	Cancer of larynx	0.193	0.0921017	0.0359	407079	258
12:112919388:G:A	rs10774671	OAS1.10361.25.3		UKB SAIGE	Intervertebral disc disorders	-0.0371	0.0158003	0.019	401158	9241
12:112919388:G:A	rs10774671	OAS1.10361.25.3		UKB Neale v2	Platelet count	-0.658213	0.144911	5.5692e-06	350474
12:112919388:G:A	rs10774671	OAS1.10361.25.3		UKB Neale v2	Ever suffered mental distress preventing usual activities	0.0194456	0.00904675	0.0315971	116527	38681
12:112919388:G:A	rs10774671	OAS1.10361.25.3		UKB Neale v2	Leg claudication/ intermittent claudication | non-cancer illness code, self-reported	-0.183308	0.0889879	0.0394027	361141	277
12:112919388:G:A	rs10774671	OAS1.10361.25.3		UKB SAIGE	Osteoporosis, osteopenia and pathological fracture	-0.0428	0.0173003	0.0135	408961	7682
12:112919388:G:A	rs10774671	OAS1.10361.25.3		UKB SAIGE	Personal history of diseases of blood and blood-forming organs	-0.177	0.0870016	0.0421	401666	291
12:112919388:G:A	rs10774671	OAS1.10361.25.3		UKB SAIGE	Rheumatoid arthritis and other inflammatory polyarthropathies	-0.0471	0.0216004	0.0292	369964	4879
12:112919388:G:A	rs10774671	OAS1.10361.25.3		UKB Neale v2	None of the above | transport type for commuting to job workplace	-0.117896	0.0527537	0.0254263	190832	789
12:112919388:G:A	rs10774671	OAS1.10361.25.3		UKB Neale v2	Oilatum cream | treatment/medication code	-0.234253	0.118592	0.0482339	361141	156
12:112919388:G:A	rs10774671	OAS1.10361.25.3		UKB Neale v2	Ever had bowel cancer screening	-0.011797	0.00495353	0.01724	355353	114475
12:112919388:G:A	rs10774671	OAS1.10361.25.3		UKB Neale v2	Triamcinolone | treatment/medication code	-0.287183	0.123002	0.0195534	361141	145
12:112919388:G:A	rs10774671	OAS1.10361.25.3		UKB Neale v2	Arm fat mass (right)	0.00493339	0.00152264	0.00119528	354736
12:112919388:G:A	rs10774671	OAS1.10361.25.3		UKB Neale v2	Trunk fat percentage	0.0621389	0.0178666	0.000505337	354619
12:112919388:G:A	rs10774671	OAS1.10361.25.3		UKB Neale v2	Leg predicted mass (left)	0.00601081	0.00280736	0.0322678	354766
12:112919388:G:A	rs10774671	OAS1.10361.25.3		UKB Neale v2	Icd10: c71.9 brain, unspecified | underlying (primary) cause of death	-0.25232	0.0914162	0.00578877	9092	270
12:112919388:G:A	rs10774671	OAS1.10361.25.3		UKB Neale v2	Psoriatic arthropathy | non-cancer illness code, self-reported	-0.117153	0.0555523	0.0349518	361141	712
12:112919388:G:A	rs10774671	OAS1.10361.25.3		UKB Neale v2	Lichen sclerosis | non-cancer illness code, self-reported	-0.262631	0.13353	0.0491997	361141	123
12:112919388:G:A	rs10774671	OAS1.10361.25.3		UKB Neale v2	Vitamin e | vitamin and/or mineral supplement use	-0.114219	0.0481513	0.0176894	51427	961
12:112919388:G:A	rs10774671	OAS1.10361.25.3		UKB Neale v2	Leg fat percentage (left)	0.0421142	0.0129346	0.00113029	354791
12:112919388:G:A	rs10774671	OAS1.10361.25.3		UKB Neale v2	Trunk fat mass	0.0440038	0.0127502	0.000558103	354597
12:112919388:G:A	rs10774671	OAS1.10361.25.3		UKB SAIGE	Open wound of ear	0.217	0.106002	0.0405	400622	196
12:112919388:G:A	rs10774671	OAS1.10361.25.3		UKB Neale v2	Creon e/c granules in capsule | treatment/medication code	-0.251076	0.10371	0.0154787	361141	204
12:112919388:G:A	rs10774671	OAS1.10361.25.3		UKB SAIGE	Digestive congenital anomalies	0.113	0.055801	0.043	407433	703
12:112919388:G:A	rs10774671	OAS1.10361.25.3		UKB SAIGE	Diaphragmatic hernia	-0.024	0.00967018	0.0129	388743	27126
12:112919388:G:A	rs10774671	OAS1.10361.25.3	PMID:27863252	Astle WJ	Eosinophil percentage of granulocytes	-0.00751005	0.00373132	0.04415	170536
12:112919388:G:A	rs10774671	OAS1.10361.25.3		UKB Neale v2	Biscuit cereal (e.g. weetabix) | cereal type	0.0195228	0.00706382	0.00571328	299898	53310
12:112919388:G:A	rs10774671	OAS1.10361.25.3		UKB SAIGE	Crystal arthropathies	0.152	0.0600011	0.0113	405814	616
12:112919388:G:A	rs10774671	OAS1.10361.25.3		UKB Neale v2	Number of cigarettes previously smoked daily	-0.0104336	0.00435466	0.0165794	84456
12:112919388:G:A	rs10774671	OAS1.10361.25.3		UKB Neale v2	Leg fat mass (right)	0.0116742	0.0038742	0.00258415	354807
12:112919388:G:A	rs10774671	OAS1.10361.25.3		UKB Neale v2	Leg predicted mass (right)	0.00586675	0.00280103	0.0362161	354798
12:112919388:G:A	rs10774671	OAS1.10361.25.3		UKB SAIGE	Acute vascular insufficiency of intestine	-0.223	0.0913017	0.0145	400859	264
12:112919388:G:A	rs10774671	OAS1.10361.25.3		UKB SAIGE	Abnormal findings on mammogram or breast exam	-0.0753	0.0375007	0.0447	403326	1580
12:112919388:G:A	rs10774671	OAS1.10361.25.3		UKB SAIGE	Transient mental disorders due to conditions classified elsewhere	-0.406	0.135002	0.00264	402504	121
12:112919388:G:A	rs10774671	OAS1.10361.25.3		UKB Neale v2	Salmeterol | treatment/medication code	0.0960964	0.0473805	0.0425384	361141	979
12:112919388:G:A	rs10774671	OAS1.10361.25.3		UKB SAIGE	Fracture of unspecified part of femur	-0.325	0.114002	0.00445	387933	168
12:112919388:G:A	rs10774671	OAS1.10361.25.3		UKB Neale v2	Arthritis (nos) | non-cancer illness code, self-reported	-0.0555762	0.0281227	0.0481287	361141	2787
12:112919388:G:A	rs10774671	OAS1.10361.25.3		UKB Neale v2	Tetracycline | treatment/medication code	-0.341366	0.144543	0.0181906	361141	105
12:112919388:G:A	rs10774671	OAS1.10361.25.3	PMID:27863252	Astle WJ	Myeloid white cell count	-0.00845517	0.0037547	0.02433	169219
12:112919388:G:A	rs10774671	OAS1.10361.25.3		UKB Neale v2	Social anxiety or social phobia | mental health problems ever diagnosed by a professional	-0.0901441	0.038664	0.0197277	117716	1474
12:112919388:G:A	rs10774671	OAS1.10361.25.3		UKB Neale v2	No | hearing difficulty/problems	-0.0122628	0.0056149	0.028962	346635	90797
12:112919388:G:A	rs10774671	OAS1.10361.25.3		UKB Neale v2	Death of a spouse or partner | illness, injury, bereavement, stress in last 2 years	-0.0589628	0.0199187	0.00307434	358836	5588
12:112919388:G:A	rs10774671	OAS1.10361.25.3		UKB Neale v2	Wrist | fractured bone site(s)	-0.0485867	0.0175797	0.00571264	359241	7200
12:112919388:G:A	rs10774671	OAS1.10361.25.3		UKB Neale v2	Basophill count	-0.00515544	0.00210547	0.0143422	349856
12:112919388:G:A	rs10774671	OAS1.10361.25.3		UKB Neale v2	Lymphocyte count	-0.00794945	0.00280829	0.00464477	349856
12:112919388:G:A	rs10774671	OAS1.10361.25.3		UKB Neale v2	Zirtek 10mg tablet | treatment/medication code	-0.492959	0.14665	0.000775225	361141	102
12:112919388:G:A	rs10774671	OAS1.10361.25.3		UKB Neale v2	P duration	0.503894	0.23043	0.0287821	10785
12:112919388:G:A	rs10774671	OAS1.10361.25.3		UKB Neale v2	Other therapeutic activities such as mindfulness, yoga or art classes | activities undertaken to treat depression	0.0424903	0.0158906	0.00749644	117763	9199
12:112919388:G:A	rs10774671	OAS1.10361.25.3		UKB Neale v2	Use of sun/uv protection	-0.00460002	0.00213033	0.0308274	358559
12:112919388:G:A	rs10774671	OAS1.10361.25.3		UKB Neale v2	Leg fat-free mass (right)	0.00605548	0.00298729	0.0426548	354798
12:112919388:G:A	rs10774671	OAS1.10361.25.3		UKB Neale v2	Facial ageing	0.00291413	0.00126163	0.0208987	330409
12:112919388:G:A	rs10774671	OAS1.10361.25.3		UKB Neale v2	Trospium | treatment/medication code	0.233167	0.109794	0.0336953	361141	182
12:112919388:G:A	rs10774671	OAS1.10361.25.3		UKB Neale v2	Risedronate sodium | treatment/medication code	-0.113038	0.0552674	0.040823	361141	718
12:112919388:G:A	rs10774671	OAS1.10361.25.3		UKB SAIGE	Renal failure nos	-0.0859	0.0395007	0.0295	399014	1412
12:112919388:G:A	rs10774671	OAS1.10361.25.3		UKB SAIGE	Superficial injury without mention of infection	-0.0465	0.0226004	0.04	407884	4289
12:112919388:G:A	rs10774671	OAS1.10361.25.3		UKB Neale v2	Strontium product | treatment/medication code	-0.294361	0.134632	0.0287829	361141	121
12:112919388:G:A	rs10774671	OAS1.10361.25.3		UKB Neale v2	Leg fat percentage (right)	0.0422703	0.0136065	0.00189246	354811
12:112919388:G:A	rs10774671	OAS1.10361.25.3		UKB Neale v2	Arm fat mass (left)	0.00583107	0.00170154	0.000610477	354673
12:112919388:G:A	rs10774671	OAS1.10361.25.3		UKB SAIGE	Diseases of hair and hair follicles	-0.0466	0.0206004	0.0234	407701	5344
12:112919388:G:A	rs10774671	OAS1.10361.25.3		UKB Neale v2	Gastric/stomach ulcers | non-cancer illness code, self-reported	-0.0731172	0.0293372	0.0126906	361141	2562
12:112919388:G:A	rs10774671	OAS1.10361.25.3	PMID:27863252	Astle WJ	Sum neutrophil eosinophil counts	-0.00804767	0.00373961	0.0314	170384
12:112919388:G:A	rs10774671	OAS1.10361.25.3		UKB Neale v2	Icd10: c92.0 acute myeloid leukaemia | underlying (primary) cause of death	-0.307026	0.140178	0.0285284	9092	113
12:112919388:G:A	rs10774671	OAS1.10361.25.3		UKB Neale v2	Angitil sr 90 m/r capsule | treatment/medication code	-0.291348	0.13247	0.027851	361141	125
12:112919388:G:A	rs10774671	OAS1.10361.25.3		UKB Neale v2	Pioglitazone | treatment/medication code	0.131376	0.0543253	0.0155915	361141	744
12:112919388:G:A	rs10774671	OAS1.10361.25.3		UKB Neale v2	None of the above (group 1) | illnesses of adopted mother	-0.121122	0.0549698	0.0276403	2953	1320
12:112919388:G:A	rs10774671	OAS1.10361.25.3		UKB SAIGE	Constipation	-0.0378	0.0149003	0.011	345225	10442
12:112919388:G:A	rs10774671	OAS1.10361.25.3		UKB Neale v2	Arm fat percentage (left)	0.072295	0.0186299	0.000104221	354707
12:112919388:G:A	rs10774671	OAS1.10361.25.3		UKB Neale v2	Stopping prescribed medication | methods of self-harm used	0.214299	0.0906482	0.0180746	117733	267
12:112919388:G:A	rs10774671	OAS1.10361.25.3		UKB Neale v2	Takeaway meals | type of meals eaten	0.0668117	0.032897	0.042262	51427	2090
12:112919388:G:A	rs10774671	OAS1.10361.25.3		UKB Neale v2	Number of depression episodes	0.0122444	0.00602743	0.0422163	45695
12:112919388:G:A	rs10774671	OAS1.10361.25.3		UKB Neale v2	Zanidip 10mg tablet | treatment/medication code	-0.368941	0.112932	0.00108704	361141	172
12:112919388:G:A	rs10774671	OAS1.10361.25.3		UKB Neale v2	Back pain | non-cancer illness code, self-reported	-0.0699464	0.0337349	0.0381308	361141	1937
12:112919388:G:A	rs10774671	OAS1.10361.25.3	PMID:27863252	Astle WJ	Lymphocyte counts	-0.0110363	0.00375353	0.003279	171643
12:112919388:G:A	rs10774671	OAS1.10361.25.3		UKB Neale v2	Neutrophill count	-0.0103469	0.003511	0.00320889	349856
12:112919388:G:A	rs10774671	OAS1.10361.25.3		UKB SAIGE	Poisoning by antibiotics	-0.0247	0.0114002	0.0306	400227	18430
12:112919388:G:A	rs10774671	OAS1.10361.25.3		UKB Neale v2	Whole body fat mass	0.0768889	0.0228702	0.000773966	354244
12:112919388:G:A	rs10774671	OAS1.10361.25.3		UKB Neale v2	Childhood sunburn occasions	-0.00647314	0.00251407	0.0100314	269734
12:112919388:G:A	rs10774671	OAS1.10361.25.3		UKB Neale v2	Leg fat-free mass (left)	0.00641105	0.00299406	0.0322538	354771
12:112919388:G:A	rs10774671	OAS1.10361.25.3	PMID:27863252	Astle WJ	Eosinophil percentage of white cells	-0.00732883	0.00371433	0.04848	172378
12:112919388:G:A	rs10774671	OAS1.10361.25.3		UKB Neale v2	Morning/evening person (chronotype)	0.00592523	0.00241353	0.0140888	322488
12:112919388:G:A	rs10774671	OAS1.10361.25.3		UKB Neale v2	Age when last took cannabis	-0.297397	0.117727	0.0115374	25698
12:112919388:G:A	rs10774671	OAS1.10361.25.3		UKB SAIGE	Other disorders of middle ear and mastoid	0.102	0.0516009	0.0485	405716	828
12:112919388:G:A	rs10774671	OAS1.10361.25.3		UKB Neale v2	Lichen planus | non-cancer illness code, self-reported	-0.339178	0.118965	0.00435697	361141	155
12:112919388:G:A	rs10774671	OAS1.10361.25.3		UKB Neale v2	Myositis/myopathy | non-cancer illness code, self-reported	-0.433785	0.123009	0.000421147	361141	145
12:112919388:G:A	rs10774671	OAS1.10361.25.3		UKB SAIGE	Delirium due to conditions classified elsewhere	-0.147	0.0579011	0.0111	403037	654
12:112919388:G:A	rs10774671	OAS1.10361.25.3		UKB Neale v2	Fresh fruit intake	-0.00390859	0.00144462	0.0068179	348284
12:112919388:G:A	rs10774671	OAS1.10361.25.3		UKB SAIGE	Other hypertrophic and atrophic conditions of skin	-0.0432	0.0216004	0.0453	408679	4804
12:112919388:G:A	rs10774671	OAS1.10361.25.3		UKB SAIGE	Other conditions of brain	0.154	0.0393007	8.76e-05	396635	1426
12:112919388:G:A	rs10774671	OAS1.10361.25.3		UKB Neale v2	Wants to stop smoking	0.0191295	0.00773167	0.0133604	27178
12:112919388:G:A	rs10774671	OAS1.10361.25.3		UKB Neale v2	Basal metabolic rate	4.28507	2.07516	0.0389295	354825
12:112919388:G:A	rs10774671	OAS1.10361.25.3		UKB Neale v2	Calcium carbonate+cholecalciferol 1.25g/200iu tablet | treatment/medication code	-0.155632	0.0627542	0.0131361	361141	557
12:112919388:G:A	rs10774671	OAS1.10361.25.3		UKB Neale v2	Gastrointestinal bleeding | non-cancer illness code, self-reported	-0.424413	0.124293	0.000638643	361141	142
12:112919388:G:A	rs10774671	OAS1.10361.25.3		UKB SAIGE	Nodular lymphoma	0.199	0.0771014	0.01	404837	371
12:112919388:G:A	rs10774671	OAS1.10361.25.3		UKB Neale v2	Rheumatoid arthritis | non-cancer illness code, self-reported	-0.0504261	0.0234681	0.031655	361141	4017
12:112919388:G:A	rs10774671	OAS1.10361.25.3		UKB Neale v2	White | bread type	0.0150989	0.00562994	0.00732031	348424	91452
12:112919388:G:A	rs10774671	OAS1.10361.25.3		UKB SAIGE	Osteoporosis nos	-0.0419	0.0203004	0.0392	406901	5622
12:112919388:G:A	rs10774671	OAS1.10361.25.3		UKB Neale v2	Reticulocyte percentage	-0.00765131	0.00228656	0.000819347	344728
12:112919388:G:A	rs10774671	OAS1.10361.25.3		UKB SAIGE	Ulcer of esophagus	-0.0413	0.0209004	0.0482	374518	5243
12:112919388:G:A	rs10774671	OAS1.10361.25.3		UKB Neale v2	Celebrex 200mg capsule | treatment/medication code	-0.246997	0.125182	0.0484798	361141	140
12:112919388:G:A	rs10774671	OAS1.10361.25.3		UKB SAIGE	Ptosis of eyelid	0.0949	0.0349006	0.00648	401140	1834
12:112919388:G:A	rs10774671	OAS1.10361.25.3		UKB SAIGE	Disorders of external ear	-0.0779	0.0390007	0.0458	408961	1451
12:112919388:G:A	rs10774671	OAS1.10361.25.3		UKB Neale v2	Fracture shaft of femur | non-cancer illness code, self-reported	-0.261318	0.101971	0.0103861	361141	211
12:112919388:G:A	rs10774671	OAS1.10361.25.3		UKB Neale v2	Sciatica | non-cancer illness code, self-reported	0.0795545	0.0255155	0.00182131	361141	3400
12:112919388:G:A	rs10774671	OAS1.10361.25.3		UKB Neale v2	Vascalpha 5mg m/r tablet | treatment/medication code	-0.44998	0.134639	0.000831298	361141	121
12:112919388:G:A	rs10774671	OAS1.10361.25.3		UKB SAIGE	Pathologic fracture	-0.145	0.0654012	0.0268	401793	514
12:112919388:G:A	rs10774671	OAS1.10361.25.3		UKB Neale v2	Starchy food consumers	0.0293707	0.0146584	0.0451063	51427	13706
12:112919388:G:A	rs10774671	OAS1.10361.25.3		UKB Neale v2	Body mass index (bmi)	0.0402925	0.0117076	0.000578433	354831
12:112919388:G:A	rs10774671	OAS1.10361.25.3		UKB SAIGE	Other conditions of brain, nos	0.234	0.0756014	0.00198	395595	386
12:112919388:G:A	rs10774671	OAS1.10361.25.3		UKB Neale v2	Home location at assessment - east co-ordinate (rounded)	-308.631	153.47	0.0443243	357793
12:112919388:G:A	rs10774671	OAS1.10361.25.3		UKB SAIGE	Upper gastrointestinal congenital anomalies	0.19	0.0811015	0.0194	407065	335
12:112919388:G:A	rs10774671	OAS1.10361.25.3	PMID:27989323	Ahola-Olli AV	Interferon gamma-induced protein 10 levels	-0.0575	0.0264	0.02958	3685
12:112919388:G:A	rs10774671	OAS1.10361.25.3		UKB Neale v2	Number of days/week of vigorous physical activity 10+ minutes	-0.0143871	0.00487782	0.00318314	344084
12:112919388:G:A	rs10774671	OAS1.10361.25.3	PMID:24162737	Lambert JC	Alzheimer's disease (late onset)	0.0599	0.0171	0.0004476	54162	17008
12:112919388:G:A	rs10774671	OAS1.10361.25.3		UKB Neale v2	Weight	0.102793	0.0347078	0.00306007	360116
12:112919388:G:A	rs10774671	OAS1.10361.25.3		UKB Neale v2	Platelet crit	-0.000631034	0.00011643	5.9681e-08	350471
12:112919388:G:A	rs10774671	OAS1.10361.25.3		UKB Neale v2	Gamolenic acid | treatment/medication code	-0.304054	0.140576	0.0305453	361141	111
12:112919388:G:A	rs10774671	OAS1.10361.25.3		UKB Neale v2	Cholecystitis | non-cancer illness code, self-reported	-0.224876	0.0759016	0.00304885	361141	381
12:112919388:G:A	rs10774671	OAS1.10361.25.3		UKB Neale v2	Leg fat mass (left)	0.0116249	0.003781	0.0021083	354788
12:112919388:G:A	rs10774671	OAS1.10361.25.3		UKB SAIGE	Displacement of intervertebral disc	-0.155	0.0652012	0.0177	392430	513
12:112919388:G:A	rs10774671	OAS1.10361.25.3		UKB Neale v2	Anxiety, nerves or generalized anxiety disorder | mental health problems ever diagnosed by a professional	0.0298455	0.0122915	0.0151761	117751	16730
12:112919388:G:A	rs10774671	OAS1.10361.25.3		UKB Neale v2	6mm strong meridian angle (right)	0.645406	0.252473	0.0105804	66256
12:112919388:G:A	rs10774671	OAS1.10361.25.3		UKB Neale v2	High blood pressure | illnesses of mother	-0.0118968	0.00551165	0.0308873	333048	101688
12:112919388:G:A	rs10774671	OAS1.10361.25.3	PMID:27863252	Astle WJ	Granulocyte count	-0.00842739	0.00374572	0.02446	169822
12:112919388:G:A	rs10774671	OAS1.10361.25.3		UKB Neale v2	For short-sightedness, i.e. only or mainly for distance viewing such as driving, cinema etc (called 'myopia') | reason for glasses/contact lenses	-0.0200272	0.00902094	0.0264118	360677	29318
12:112919388:G:A	rs10774671	OAS1.10361.25.3		UKB Neale v2	Plaquenil 200mg tablet | treatment/medication code	-0.267251	0.115662	0.0208524	361141	164
12:112919388:G:A	rs10774671	OAS1.10361.25.3		UKB SAIGE	Hepatomegaly	-0.187	0.0860016	0.0299	400352	297
12:112919388:G:A	rs10774671	OAS1.10361.25.3		UKB Neale v2	Solpadol caplet | treatment/medication code	-0.189042	0.0855358	0.0270965	361141	300
12:112919388:G:A	rs10774671	OAS1.10361.25.3		UKB Neale v2	Usual walking pace	-0.00566406	0.00148404	0.000135306	358974
12:112919388:G:A	rs10774671	OAS1.10361.25.3		UKB Neale v2	Rarely/never | workplace full of chemical or other fumes	0.0535548	0.0217187	0.0136696	90344	4986
12:112919388:G:A	rs10774671	OAS1.10361.25.3		UKB Neale v2	Not performed - other reason | oct measured (right)	0.0784853	0.0321014	0.0144902	54608	2207
12:112919388:G:A	rs10774671	OAS1.10361.25.3		UKB Neale v2	Victim of sexual assault	0.0257047	0.0119791	0.0318877	116671	17230
12:112919637:G:A	rs2660	OAS1.10361.25.3		UKB SAIGE	Cerebral edema and compression of brain	0.197	0.0925017	0.0334	395467	258
12:112919637:G:A	rs2660	OAS1.10361.25.3		UKB Neale v2	Sulfasalazine | treatment/medication code	-0.15922	0.0556784	0.00424086	361141	710
12:112919637:G:A	rs2660	OAS1.10361.25.3		UKB Neale v2	Reticulocyte count	-0.000302895	9.82885e-05	0.00205839	344729
12:112919637:G:A	rs2660	OAS1.10361.25.3		UKB Neale v2	Age started smoking in current smokers	-0.146748	0.0508954	0.00393802	27291
12:112919637:G:A	rs2660	OAS1.10361.25.3		UKB Neale v2	Mouth ulcers | mouth/teeth dental problems	-0.0167808	0.00813798	0.0392025	359841	36831
12:112919637:G:A	rs2660	OAS1.10361.25.3		UKB Neale v2	Frequency of other exercises in last 4 weeks	-0.0125035	0.00443356	0.00479999	172505
12:112919637:G:A	rs2660	OAS1.10361.25.3		UKB Neale v2	Calcium carbonate+colecalciferol 1.25g/5micrograms tablet | treatment/medication code	-0.274056	0.117559	0.0197391	361141	159
12:112919637:G:A	rs2660	OAS1.10361.25.3		UKB SAIGE	Giant cell arteritis	0.152	0.0753014	0.0441	400983	388
12:112919637:G:A	rs2660	OAS1.10361.25.3	PMID:27863252	Astle WJ	Plateletcrit	-0.014951	0.00381887	9.039e-05	164339
12:112919637:G:A	rs2660	OAS1.10361.25.3		UKB SAIGE	Non-hodgkins lymphoma	0.0895	0.0352006	0.011	406259	1793
12:112919637:G:A	rs2660	OAS1.10361.25.3		UKB SAIGE	Hereditary hemolytic anemias	-0.237	0.119002	0.0463	390182	156
12:112919637:G:A	rs2660	OAS1.10361.25.3	PMID:27989323	Ahola-Olli AV	Monokine induced by gamma interferon levels	-0.0743	0.0264	0.004781	3685
12:112919637:G:A	rs2660	OAS1.10361.25.3		UKB Neale v2	Nasobec aqueous 50micrograms nasal spray | treatment/medication code	-0.254744	0.119087	0.0324216	361141	155
12:112919637:G:A	rs2660	OAS1.10361.25.3		UKB Neale v2	None of the above | attendance/disability/mobility allowance	0.0207645	0.0105614	0.0492876	358597	20718
12:112919637:G:A	rs2660	OAS1.10361.25.3		UKB Neale v2	Bisoprolol fumarate+hydrochlorothiazide 10mg/6.25mg tablet | treatment/medication code	0.267038	0.0969121	0.00586016	361141	234
12:112919637:G:A	rs2660	OAS1.10361.25.3		UKB SAIGE	Malignant neoplasm of other and ill-defined sites within the digestive organs and peritoneum	0.0428	0.0201004	0.0334	398956	5584
12:112919637:G:A	rs2660	OAS1.10361.25.3		UKB Neale v2	Magnesium citrate | treatment/medication code	-0.296554	0.126661	0.0192132	361141	137
12:112919637:G:A	rs2660	OAS1.10361.25.3		UKB Neale v2	Risk taking	-0.0119755	0.00561986	0.0330916	348549	90500
12:112919637:G:A	rs2660	OAS1.10361.25.3		UKB SAIGE	Valvular heart disease/ heart chambers	-0.241	0.0973018	0.0131	406398	233
12:112919637:G:A	rs2660	OAS1.10361.25.3		UKB Neale v2	Recent worrying too much about different things	0.00685468	0.00289174	0.0177688	117567
12:112919637:G:A	rs2660	OAS1.10361.25.3		UKB SAIGE	Tympanosclerosis and middle ear disease related to otitis media	0.244	0.0955018	0.0105	405129	241
12:112919637:G:A	rs2660	OAS1.10361.25.3		UKB Neale v2	Sodium in urine	0.259549	0.105033	0.0134694	350061
12:112919637:G:A	rs2660	OAS1.10361.25.3	PMID:29304378	Medina-Gomez C	Total body bone mineral density (age 30-45)	-0.0387	0.0162	0.0168	10062
12:112919637:G:A	rs2660	OAS1.10361.25.3		UKB Neale v2	Weight	0.105734	0.0348882	0.00244037	354838
12:112919637:G:A	rs2660	OAS1.10361.25.3		UKB SAIGE	Encephalopathy, not elsewhere classified	0.239	0.0963018	0.013	395446	237
12:112919637:G:A	rs2660	OAS1.10361.25.3		UKB Neale v2	Rectal cancer | cancer code, self-reported	0.22203	0.0899037	0.0135234	361141	272
12:112919637:G:A	rs2660	OAS1.10361.25.3		UKB SAIGE	Secondary malignant neoplasm of liver	0.0704	0.0291005	0.0157	373242	2638
12:112919637:G:A	rs2660	OAS1.10361.25.3	PMID:29942086	Savage JE	Intelligence	-0.0066453	0.00289429	0.0217	269867
12:112919637:G:A	rs2660	OAS1.10361.25.3		UKB Neale v2	Smoked cigarette or pipe within last hour	-0.048449	0.0242449	0.0456864	33210	4238
12:112919637:G:A	rs2660	OAS1.10361.25.3	PMID:27863252	Astle WJ	Platelet count	-0.0119337	0.00380503	0.001711	166066
12:112919637:G:A	rs2660	OAS1.10361.25.3		UKB Neale v2	Hydroxycarbamide | treatment/medication code	-0.368824	0.116838	0.00159536	361141	161
12:112919637:G:A	rs2660	OAS1.10361.25.3		UKB Neale v2	Other vitamin | vitamin and/or mineral supplement use	-0.0679133	0.0342435	0.047341	51427	1937
12:112919637:G:A	rs2660	OAS1.10361.25.3		UKB Neale v2	Body mass index (bmi)	0.0418257	0.0116728	0.000339468	359983
12:112919637:G:A	rs2660	OAS1.10361.25.3		UKB SAIGE	Noninfectious disorders of lymphatic channels	-0.137	0.056001	0.0148	408961	705
12:112919637:G:A	rs2660	OAS1.10361.25.3		UKB Neale v2	Leg pain when walking normally	-0.0456896	0.0186483	0.0142878	25305	10993
12:112919637:G:A	rs2660	OAS1.10361.25.3		UKB Neale v2	Hearing aid user	0.0285567	0.0143698	0.0468887	219358	10942
12:112919637:G:A	rs2660	OAS1.10361.25.3		UKB Neale v2	Viscotears liquid eye gel | treatment/medication code	-0.111331	0.0511358	0.0294669	361141	841
12:112919637:G:A	rs2660	OAS1.10361.25.3		UKB Neale v2	Often | workplace very cold	0.0456473	0.0172973	0.00831582	90188	7881
12:112919637:G:A	rs2660	OAS1.10361.25.3		UKB Neale v2	Semiskimmed | type milk consumed	-0.0308945	0.0134073	0.0212075	51427	19497
12:112919637:G:A	rs2660	OAS1.10361.25.3		UKB Neale v2	Current employment status: Full or part-time student	-0.055066	0.0279488	0.0488065	359931	2818
12:112919637:G:A	rs2660	OAS1.10361.25.3		UKB SAIGE	Allergy/adverse effect of penicillin	-0.0264	0.0122002	0.0303	397887	16090
12:112919637:G:A	rs2660	OAS1.10361.25.3		UKB Neale v2	Liquifilm tears 1.4% eye drops | treatment/medication code	-0.239823	0.12024	0.0460917	361141	152
12:112919637:G:A	rs2660	OAS1.10361.25.3		UKB SAIGE	Poisoning by analgesics, antipyretics, and antirheumatics	-0.0361	0.0182003	0.0473	388707	6910
12:112919637:G:A	rs2660	OAS1.10361.25.3		UKB Neale v2	Dentures | mouth/teeth dental problems	0.0138692	0.00629988	0.0276986	359841	60977
12:112919637:G:A	rs2660	OAS1.10361.25.3		UKB SAIGE	Other disorders of ear	0.221	0.104002	0.0338	404764	202
12:112919637:G:A	rs2660	OAS1.10361.25.3		UKB Neale v2	Indapamide | treatment/medication code	-0.0992338	0.0437145	0.0232027	361141	1152
12:112919637:G:A	rs2660	OAS1.10361.25.3		UKB SAIGE	Dermatophytosis of nail	-0.344	0.170003	0.0435	406377	76
12:112919637:G:A	rs2660	OAS1.10361.25.3		UKB Neale v2	Yes | hearing difficulty/problems	0.0116499	0.00562189	0.0382401	346635	90710
12:112919637:G:A	rs2660	OAS1.10361.25.3		UKB SAIGE	Other diseases of lung	0.127	0.053201	0.017	408961	781
12:112919637:G:A	rs2660	OAS1.10361.25.3		UKB Neale v2	White blood cell (leukocyte) count	-0.0200851	0.00507566	7.5865e-05	350470
12:112919637:G:A	rs2660	OAS1.10361.25.3		UKB SAIGE	Primary biliary cirrhosis	-0.198	0.0931017	0.0333	400309	254
12:112919637:G:A	rs2660	OAS1.10361.25.3		UKB SAIGE	Cancer of larynx	0.202	0.0922017	0.0288	407079	258
12:112919637:G:A	rs2660	OAS1.10361.25.3		UKB SAIGE	Intervertebral disc disorders	-0.0351	0.0158003	0.0266	401158	9241
12:112919637:G:A	rs2660	OAS1.10361.25.3		UKB Neale v2	Platelet count	-0.673921	0.145046	3.38137e-06	350474
12:112919637:G:A	rs2660	OAS1.10361.25.3		UKB Neale v2	Ever suffered mental distress preventing usual activities	0.0199452	0.00905406	0.0276009	116527	38681
12:112919637:G:A	rs2660	OAS1.10361.25.3		UKB SAIGE	Osteoporosis, osteopenia and pathological fracture	-0.0422	0.0174003	0.0152	408961	7682
12:112919637:G:A	rs2660	OAS1.10361.25.3		UKB SAIGE	Personal history of diseases of blood and blood-forming organs	-0.186	0.0871016	0.0322	401666	291
12:112919637:G:A	rs2660	OAS1.10361.25.3		UKB SAIGE	Rheumatoid arthritis and other inflammatory polyarthropathies	-0.0505	0.0216004	0.0193	369964	4879
12:112919637:G:A	rs2660	OAS1.10361.25.3		UKB Neale v2	None of the above | transport type for commuting to job workplace	-0.113565	0.0527972	0.0314771	190832	789
12:112919637:G:A	rs2660	OAS1.10361.25.3		UKB Neale v2	Ever had bowel cancer screening	-0.0112127	0.00495825	0.0237322	355353	114475
12:112919637:G:A	rs2660	OAS1.10361.25.3		UKB Neale v2	Triamcinolone | treatment/medication code	-0.266756	0.123118	0.0302574	361141	145
12:112919637:G:A	rs2660	OAS1.10361.25.3		UKB Neale v2	Arm fat mass (right)	0.00504446	0.00152408	0.000933565	354736
12:112919637:G:A	rs2660	OAS1.10361.25.3		UKB Neale v2	Trunk fat percentage	0.0647498	0.0178835	0.000293906	354619
12:112919637:G:A	rs2660	OAS1.10361.25.3		UKB Neale v2	Leg predicted mass (left)	0.0061752	0.00281002	0.0279809	354766
12:112919637:G:A	rs2660	OAS1.10361.25.3		UKB Neale v2	Icd10: c71.9 brain, unspecified | underlying (primary) cause of death	-0.220664	0.0916495	0.0160712	9092	270
12:112919637:G:A	rs2660	OAS1.10361.25.3		UKB SAIGE	Influenza	-0.169	0.0818015	0.0386	398866	328
12:112919637:G:A	rs2660	OAS1.10361.25.3		UKB Neale v2	Bipolar i disorder | bipolar and major depression status	-0.125936	0.0629293	0.0453672	86895	556
12:112919637:G:A	rs2660	OAS1.10361.25.3		UKB Neale v2	Psoriatic arthropathy | non-cancer illness code, self-reported	-0.12335	0.0556041	0.0265281	361141	712
12:112919637:G:A	rs2660	OAS1.10361.25.3		UKB Neale v2	Vitamin e | vitamin and/or mineral supplement use	-0.111894	0.0481769	0.0202041	51427	961
12:112919637:G:A	rs2660	OAS1.10361.25.3		UKB Neale v2	Leg fat percentage (left)	0.0439252	0.0129468	0.000692046	354791
12:112919637:G:A	rs2660	OAS1.10361.25.3		UKB Neale v2	Trunk fat mass	0.0455231	0.0127622	0.000361124	354597
12:112919637:G:A	rs2660	OAS1.10361.25.3		UKB Neale v2	Difficulty concentrating during worst period of anxiety	0.0381494	0.018322	0.0373315	34879	8479
12:112919637:G:A	rs2660	OAS1.10361.25.3		UKB SAIGE	Open wound of ear	0.208	0.106002	0.0495	400622	196
12:112919637:G:A	rs2660	OAS1.10361.25.3		UKB Neale v2	Creon e/c granules in capsule | treatment/medication code	-0.249943	0.103807	0.0160487	361141	204
12:112919637:G:A	rs2660	OAS1.10361.25.3		UKB SAIGE	Digestive congenital anomalies	0.113	0.055901	0.0425	407433	703
12:112919637:G:A	rs2660	OAS1.10361.25.3		UKB SAIGE	Diaphragmatic hernia	-0.0255	0.00967018	0.00832	388743	27126
12:112919637:G:A	rs2660	OAS1.10361.25.3		UKB Neale v2	Biscuit cereal (e.g. weetabix) | cereal type	0.021326	0.00707052	0.00255959	299898	53310
12:112919637:G:A	rs2660	OAS1.10361.25.3		UKB SAIGE	Crystal arthropathies	0.157	0.0600011	0.00899	405814	616
12:112919637:G:A	rs2660	OAS1.10361.25.3		UKB Neale v2	Number of cigarettes previously smoked daily	-0.0103348	0.00435862	0.0177366	84456
12:112919637:G:A	rs2660	OAS1.10361.25.3		UKB Neale v2	Leg fat mass (right)	0.0120182	0.00387786	0.00194062	354807
12:112919637:G:A	rs2660	OAS1.10361.25.3		UKB Neale v2	Leg predicted mass (right)	0.00611466	0.00280367	0.0291882	354798
12:112919637:G:A	rs2660	OAS1.10361.25.3		UKB Neale v2	Headaches (not migraine) | non-cancer illness code, self-reported	-0.0530479	0.0270613	0.0499594	361141	3022
12:112919637:G:A	rs2660	OAS1.10361.25.3		UKB SAIGE	Acute vascular insufficiency of intestine	-0.2	0.0913017	0.0289	400859	264
12:112919637:G:A	rs2660	OAS1.10361.25.3		UKB SAIGE	Abnormal findings on mammogram or breast exam	-0.0747	0.0375007	0.0466	403326	1580
12:112919637:G:A	rs2660	OAS1.10361.25.3		UKB SAIGE	Transient mental disorders due to conditions classified elsewhere	-0.398	0.135002	0.00324	402504	121
12:112919637:G:A	rs2660	OAS1.10361.25.3		UKB Neale v2	Salmeterol | treatment/medication code	0.100517	0.0474249	0.0340459	361141	979
12:112919637:G:A	rs2660	OAS1.10361.25.3		UKB SAIGE	Fracture of unspecified part of femur	-0.322	0.114002	0.00491	387933	168
12:112919637:G:A	rs2660	OAS1.10361.25.3		UKB Neale v2	Waist circumference	0.0658292	0.0293164	0.0247381	360564
12:112919637:G:A	rs2660	OAS1.10361.25.3		UKB Neale v2	Answered sexual history questions	-0.0190953	0.00887568	0.0314409	361015	29611
12:112919637:G:A	rs2660	OAS1.10361.25.3		UKB Neale v2	Breast cancer | illnesses of mother	0.018116	0.00919761	0.0488754	330828	27622
12:112919637:G:A	rs2660	OAS1.10361.25.3		UKB Neale v2	Detrusitol 1mg tablet | treatment/medication code	-0.15973	0.0631793	0.0114639	361141	551
12:112919637:G:A	rs2660	OAS1.10361.25.3		UKB Neale v2	Blood clot in the leg (dvt) | blood clot, dvt, bronchitis, emphysema, asthma, rhinitis, eczema, allergy diagnosed by doctor	-0.0359956	0.0174013	0.0385851	360527	7386
12:112919637:G:A	rs2660	OAS1.10361.25.3		UKB Neale v2	Naproxen | treatment/medication code	0.0839445	0.0307477	0.00633084	361141	2338
12:112919637:G:A	rs2660	OAS1.10361.25.3		UKB Neale v2	Spells in hospital	-0.00543444	0.00243672	0.0257335	236484
12:112919637:G:A	rs2660	OAS1.10361.25.3		UKB Neale v2	Rarely/never | workplace had a lot of cigarette smoke from other people smoking	0.0284689	0.0137314	0.0381459	90716	13422
12:112919637:G:A	rs2660	OAS1.10361.25.3		UKB Neale v2	Tetracycline | treatment/medication code	-0.330234	0.144679	0.0224563	361141	105
12:112919637:G:A	rs2660	OAS1.10361.25.3	PMID:27863252	Astle WJ	Myeloid white cell count	-0.00887382	0.00376308	0.01837	169219
12:112919637:G:A	rs2660	OAS1.10361.25.3		UKB Neale v2	Social anxiety or social phobia | mental health problems ever diagnosed by a professional	-0.0961854	0.0386966	0.0129321	117716	1474
12:112919637:G:A	rs2660	OAS1.10361.25.3		UKB Neale v2	No | hearing difficulty/problems	-0.0117837	0.00562013	0.0360177	346635	90797
12:112919637:G:A	rs2660	OAS1.10361.25.3		UKB Neale v2	Death of a spouse or partner | illness, injury, bereavement, stress in last 2 years	-0.0571576	0.0199376	0.00414563	358836	5588
12:112919637:G:A	rs2660	OAS1.10361.25.3		UKB Neale v2	Wrist | fractured bone site(s)	-0.0487632	0.0175964	0.00558418	359241	7200
12:112919637:G:A	rs2660	OAS1.10361.25.3		UKB Neale v2	Basophill count	-0.00494774	0.00210745	0.0188881	349856
12:112919637:G:A	rs2660	OAS1.10361.25.3		UKB Neale v2	Lymphocyte count	-0.00822867	0.00281092	0.00341833	349856
12:112919637:G:A	rs2660	OAS1.10361.25.3		UKB Neale v2	Arm fat-free mass (right)	0.00215443	0.00108512	0.0470969	354732
12:112919637:G:A	rs2660	OAS1.10361.25.3		UKB Neale v2	Zirtek 10mg tablet | treatment/medication code	-0.481431	0.146788	0.0010388	361141	102
12:112919637:G:A	rs2660	OAS1.10361.25.3		UKB Neale v2	P duration	0.501152	0.23046	0.0296841	10785
12:112919637:G:A	rs2660	OAS1.10361.25.3		UKB Neale v2	Other therapeutic activities such as mindfulness, yoga or art classes | activities undertaken to treat depression	0.0431217	0.0159039	0.00669987	117763	9199
12:112919637:G:A	rs2660	OAS1.10361.25.3		UKB Neale v2	Use of sun/uv protection	-0.00444103	0.00213235	0.0372795	358559
12:112919637:G:A	rs2660	OAS1.10361.25.3		UKB Neale v2	Leg fat-free mass (right)	0.00631161	0.00299011	0.0347879	354798
12:112919637:G:A	rs2660	OAS1.10361.25.3		UKB Neale v2	Facial ageing	0.00277342	0.00126273	0.0280664	330409
12:112919637:G:A	rs2660	OAS1.10361.25.3		UKB Neale v2	Trospium | treatment/medication code	0.236669	0.109897	0.0312723	361141	182
12:112919637:G:A	rs2660	OAS1.10361.25.3		UKB Neale v2	Risedronate sodium | treatment/medication code	-0.109785	0.0553193	0.0471885	361141	718
12:112919637:G:A	rs2660	OAS1.10361.25.3		UKB SAIGE	Superficial injury without mention of infection	-0.0481	0.0227004	0.034	407884	4289
12:112919637:G:A	rs2660	OAS1.10361.25.3		UKB Neale v2	Strontium product | treatment/medication code	-0.285917	0.134758	0.03386	361141	121
12:112919637:G:A	rs2660	OAS1.10361.25.3		UKB Neale v2	Leg fat percentage (right)	0.0434742	0.0136193	0.00141256	354811
12:112919637:G:A	rs2660	OAS1.10361.25.3		UKB Neale v2	Arm fat mass (left)	0.00594884	0.00170315	0.000477943	354673
12:112919637:G:A	rs2660	OAS1.10361.25.3		UKB SAIGE	Diseases of hair and hair follicles	-0.0473	0.0206004	0.0215	407701	5344
12:112919637:G:A	rs2660	OAS1.10361.25.3		UKB Neale v2	Forced vital capacity (fvc), best measure	-0.00398645	0.0019503	0.0409529	272338
12:112919637:G:A	rs2660	OAS1.10361.25.3		UKB Neale v2	Gastric/stomach ulcers | non-cancer illness code, self-reported	-0.0691732	0.0293647	0.0184883	361141	2562
12:112919637:G:A	rs2660	OAS1.10361.25.3	PMID:27863252	Astle WJ	Sum neutrophil eosinophil counts	-0.00848905	0.003748	0.02352	170384
12:112919637:G:A	rs2660	OAS1.10361.25.3		UKB Neale v2	Doctor diagnosed chronic bronchitis	0.0978004	0.0458734	0.0330087	91787	1048
12:112919637:G:A	rs2660	OAS1.10361.25.3		UKB Neale v2	Icd10: c92.0 acute myeloid leukaemia | underlying (primary) cause of death	-0.317054	0.140519	0.0240735	9092	113
12:112919637:G:A	rs2660	OAS1.10361.25.3		UKB Neale v2	Angitil sr 90 m/r capsule | treatment/medication code	-0.301198	0.132594	0.0231104	361141	125
12:112919637:G:A	rs2660	OAS1.10361.25.3		UKB Neale v2	Pioglitazone | treatment/medication code	0.136715	0.0543764	0.0119275	361141	744
12:112919637:G:A	rs2660	OAS1.10361.25.3		UKB Neale v2	None of the above (group 1) | illnesses of adopted mother	-0.125354	0.0550353	0.0228159	2953	1320
12:112919637:G:A	rs2660	OAS1.10361.25.3		UKB SAIGE	Constipation	-0.0388	0.0149003	0.00904	345225	10442
12:112919637:G:A	rs2660	OAS1.10361.25.3		UKB Neale v2	Arm fat percentage (left)	0.0735746	0.0186475	7.96346e-05	354707
12:112919637:G:A	rs2660	OAS1.10361.25.3		UKB Neale v2	Stopping prescribed medication | methods of self-harm used	0.205951	0.090722	0.0231985	117733	267
12:112919637:G:A	rs2660	OAS1.10361.25.3		UKB Neale v2	Zanidip 10mg tablet | treatment/medication code	-0.340748	0.113038	0.00257405	361141	172
12:112919637:G:A	rs2660	OAS1.10361.25.3		UKB Neale v2	Back pain | non-cancer illness code, self-reported	-0.0707741	0.0337665	0.0360805	361141	1937
12:112919637:G:A	rs2660	OAS1.10361.25.3	PMID:27863252	Astle WJ	Lymphocyte counts	-0.01251	0.00376195	0.0008829	171643
12:112919637:G:A	rs2660	OAS1.10361.25.3		UKB Neale v2	Neutrophill count	-0.0098209	0.00351429	0.00519733	349856
12:112919637:G:A	rs2660	OAS1.10361.25.3		UKB SAIGE	Poisoning by antibiotics	-0.0241	0.0114002	0.0353	400227	18430
12:112919637:G:A	rs2660	OAS1.10361.25.3		UKB Neale v2	Whole body fat mass	0.0793337	0.0228918	0.00052914	354244
12:112919637:G:A	rs2660	OAS1.10361.25.3		UKB Neale v2	Childhood sunburn occasions	-0.00663161	0.00251638	0.00840477	269734
12:112919637:G:A	rs2660	OAS1.10361.25.3		UKB Neale v2	Leg fat-free mass (left)	0.0065788	0.00299689	0.028149	354771
12:112919637:G:A	rs2660	OAS1.10361.25.3		UKB Neale v2	Milk intake	-0.00582056	0.00291119	0.0455732	51413
12:112919637:G:A	rs2660	OAS1.10361.25.3		UKB Neale v2	Morning/evening person (chronotype)	0.00584455	0.00241582	0.0155519	322488
12:112919637:G:A	rs2660	OAS1.10361.25.3		UKB Neale v2	Age when last took cannabis	-0.311559	0.117845	0.00820317	25698
12:112919637:G:A	rs2660	OAS1.10361.25.3		UKB Neale v2	Jaundice (unknown cause) | non-cancer illness code, self-reported	0.180198	0.0861882	0.0365472	361141	296
12:112919637:G:A	rs2660	OAS1.10361.25.3		UKB SAIGE	Other disorders of middle ear and mastoid	0.109	0.0516009	0.0352	405716	828
12:112919637:G:A	rs2660	OAS1.10361.25.3		UKB Neale v2	Lichen planus | non-cancer illness code, self-reported	-0.335061	0.119077	0.00489498	361141	155
12:112919637:G:A	rs2660	OAS1.10361.25.3		UKB Neale v2	Attempted fluid intelligence (fi) test.	-0.0747278	0.0380445	0.0495026	118657	1526
12:112919637:G:A	rs2660	OAS1.10361.25.3		UKB Neale v2	Myositis/myopathy | non-cancer illness code, self-reported	-0.413658	0.123125	0.000780265	361141	145
12:112919637:G:A	rs2660	OAS1.10361.25.3		UKB SAIGE	Delirium due to conditions classified elsewhere	-0.133	0.0580011	0.0216	403037	654
12:112919637:G:A	rs2660	OAS1.10361.25.3		UKB Neale v2	Fresh fruit intake	-0.00389432	0.00144592	0.00707505	348284
12:112919637:G:A	rs2660	OAS1.10361.25.3		UKB SAIGE	Other hypertrophic and atrophic conditions of skin	-0.0424	0.0216004	0.0494	408679	4804
12:112919637:G:A	rs2660	OAS1.10361.25.3		UKB SAIGE	Other conditions of brain	0.153	0.0394007	0.000102	396635	1426
12:112919637:G:A	rs2660	OAS1.10361.25.3		UKB Neale v2	Wants to stop smoking	0.0191971	0.0077362	0.0130902	27178
12:112919637:G:A	rs2660	OAS1.10361.25.3		UKB Neale v2	Decaffeinated coffee	0.0814075	0.0408703	0.0463889	51427	5879
12:112919637:G:A	rs2660	OAS1.10361.25.3		UKB Neale v2	Basal metabolic rate	4.42859	2.07711	0.0330004	354825
12:112919637:G:A	rs2660	OAS1.10361.25.3		UKB Neale v2	Calcium carbonate+cholecalciferol 1.25g/200iu tablet | treatment/medication code	-0.149212	0.0628131	0.0175238	361141	557
12:112919637:G:A	rs2660	OAS1.10361.25.3		UKB Neale v2	Gastrointestinal bleeding | non-cancer illness code, self-reported	-0.403668	0.12441	0.00117576	361141	142
12:112919637:G:A	rs2660	OAS1.10361.25.3		UKB SAIGE	Nodular lymphoma	0.201	0.0772014	0.00915	404837	371
12:112919637:G:A	rs2660	OAS1.10361.25.3	PMID:27863252	Astle WJ	Neutrophil count	-0.00768026	0.00374489	0.04028	170702
12:112919637:G:A	rs2660	OAS1.10361.25.3		UKB Neale v2	Rheumatoid arthritis | non-cancer illness code, self-reported	-0.0551627	0.0234901	0.0188558	361141	4017
12:112919637:G:A	rs2660	OAS1.10361.25.3		UKB Neale v2	White | bread type	0.0149774	0.00563521	0.00786391	348424	91452
12:112919637:G:A	rs2660	OAS1.10361.25.3		UKB SAIGE	Osteoporosis nos	-0.041	0.0203004	0.0438	406901	5622
12:112919637:G:A	rs2660	OAS1.10361.25.3		UKB Neale v2	Reticulocyte percentage	-0.00762579	0.00228864	0.000862281	344728
12:112919637:G:A	rs2660	OAS1.10361.25.3		UKB Neale v2	Monocyte count	-0.00110839	0.000544047	0.0416195	349856
12:112919637:G:A	rs2660	OAS1.10361.25.3		UKB Neale v2	Celebrex 200mg capsule | treatment/medication code	-0.256246	0.125299	0.0408444	361141	140
12:112919637:G:A	rs2660	OAS1.10361.25.3		UKB SAIGE	Ptosis of eyelid	0.103	0.0349006	0.00326	401140	1834
12:112919637:G:A	rs2660	OAS1.10361.25.3		UKB SAIGE	Disorders of external ear	-0.0768	0.0391007	0.0493	408961	1451
12:112919637:G:A	rs2660	OAS1.10361.25.3		UKB Neale v2	Fracture shaft of femur | non-cancer illness code, self-reported	-0.251027	0.102067	0.0139146	361141	211
12:112919637:G:A	rs2660	OAS1.10361.25.3		UKB Neale v2	Sciatica | non-cancer illness code, self-reported	0.0775803	0.0255395	0.00238389	361141	3400
12:112919637:G:A	rs2660	OAS1.10361.25.3		UKB Neale v2	Vascalpha 5mg m/r tablet | treatment/medication code	-0.442668	0.134765	0.00102068	361141	121
12:112919637:G:A	rs2660	OAS1.10361.25.3		UKB SAIGE	Pathologic fracture	-0.15	0.0654012	0.0219	401793	514
12:112919637:G:A	rs2660	OAS1.10361.25.3		UKB Neale v2	Starchy food consumers	0.0301105	0.0146662	0.0400682	51427	13706
12:112919637:G:A	rs2660	OAS1.10361.25.3		UKB Neale v2	Body mass index (bmi)	0.0418354	0.0117187	0.000357057	354831
12:112919637:G:A	rs2660	OAS1.10361.25.3		UKB SAIGE	Other conditions of brain, nos	0.236	0.0756014	0.00181	395595	386
12:112919637:G:A	rs2660	OAS1.10361.25.3		UKB SAIGE	Abnormal heart sounds	0.0911	0.0460008	0.0474	403470	1049
12:112919637:G:A	rs2660	OAS1.10361.25.3		UKB SAIGE	Upper gastrointestinal congenital anomalies	0.181	0.0811015	0.026	407065	335
12:112919637:G:A	rs2660	OAS1.10361.25.3	PMID:27989323	Ahola-Olli AV	Interferon gamma-induced protein 10 levels	-0.0556	0.0264	0.03527	3685
12:112919637:G:A	rs2660	OAS1.10361.25.3		UKB Neale v2	Number of days/week of vigorous physical activity 10+ minutes	-0.0143569	0.0048826	0.00327783	344084
12:112919637:G:A	rs2660	OAS1.10361.25.3	PMID:24162737	Lambert JC	Alzheimer's disease (late onset)	0.0618	0.017	0.0002867	54162	17008
12:112919637:G:A	rs2660	OAS1.10361.25.3		UKB Neale v2	Weight	0.104921	0.0347403	0.00252668	360116
12:112919637:G:A	rs2660	OAS1.10361.25.3		UKB Neale v2	Platelet crit	-0.000639615	0.000116538	4.05745e-08	350471
12:112919637:G:A	rs2660	OAS1.10361.25.3		UKB Neale v2	Gamolenic acid | treatment/medication code	-0.313749	0.140708	0.0257592	361141	111
12:112919637:G:A	rs2660	OAS1.10361.25.3		UKB Neale v2	Cholecystitis | non-cancer illness code, self-reported	-0.216872	0.0759728	0.00430867	361141	381
12:112919637:G:A	rs2660	OAS1.10361.25.3		UKB Neale v2	Leg fat mass (left)	0.012052	0.00378457	0.00145007	354788
12:112919637:G:A	rs2660	OAS1.10361.25.3		UKB SAIGE	Displacement of intervertebral disc	-0.159	0.0653012	0.0147	392430	513
12:112919637:G:A	rs2660	OAS1.10361.25.3		UKB Neale v2	Anxiety, nerves or generalized anxiety disorder | mental health problems ever diagnosed by a professional	0.0294349	0.0123019	0.0167245	117751	16730
12:112919637:G:A	rs2660	OAS1.10361.25.3		UKB Neale v2	6mm strong meridian angle (right)	0.638071	0.252726	0.0115804	66256
12:112919637:G:A	rs2660	OAS1.10361.25.3		UKB Neale v2	High blood pressure | illnesses of mother	-0.0119053	0.00551675	0.0309237	333048	101688
12:112919637:G:A	rs2660	OAS1.10361.25.3	PMID:27863252	Astle WJ	Granulocyte count	-0.00883248	0.00375407	0.01863	169822
12:112919637:G:A	rs2660	OAS1.10361.25.3		UKB Neale v2	For short-sightedness, i.e. only or mainly for distance viewing such as driving, cinema etc (called 'myopia') | reason for glasses/contact lenses	-0.0209709	0.00902924	0.0202011	360677	29318
12:112919637:G:A	rs2660	OAS1.10361.25.3		UKB Neale v2	Plaquenil 200mg tablet | treatment/medication code	-0.26322	0.115771	0.0229866	361141	164
12:112919637:G:A	rs2660	OAS1.10361.25.3		UKB SAIGE	Hepatomegaly	-0.196	0.0861016	0.0226	400352	297
12:112919637:G:A	rs2660	OAS1.10361.25.3		UKB Neale v2	Solpadol caplet | treatment/medication code	-0.183947	0.085616	0.0316707	361141	300
12:112919637:G:A	rs2660	OAS1.10361.25.3		UKB Neale v2	Usual walking pace	-0.0056959	0.00148544	0.000125848	358974
12:112919637:G:A	rs2660	OAS1.10361.25.3		UKB Neale v2	Rarely/never | workplace full of chemical or other fumes	0.0544412	0.0217327	0.0122437	90344	4986
12:112919637:G:A	rs2660	OAS1.10361.25.3		UKB Neale v2	Not performed - other reason | oct measured (right)	0.0709609	0.0321297	0.0272051	54608	2207
12:112919637:G:A	rs2660	OAS1.10361.25.3		UKB Neale v2	Victim of sexual assault	0.0267868	0.0119888	0.0254607	116671	17230
12:112919637:G:A	rs2660	OAS1.10361.25.3		UKB SAIGE	Keratoderma, acquired	-0.479	0.160003	0.00269	403962	87
12:112919637:G:A	rs2660	OAS1.10361.25.3		UKB Neale v2	Other abdominal problem | non-cancer illness code, self-reported	0.15477	0.0721988	0.0320576	361141	422
12:112919637:G:A	rs2660	OAS1.10361.25.3		UKB SAIGE	Other hypertrophic cardiomyopathy	0.289	0.116002	0.0129	405942	163
12:112919637:G:A	rs2660	OAS1.10361.25.3		UKB Neale v2	Used an inhaler for chest within last hour	-0.0690202	0.0301925	0.022252	331625	2424
12:112919637:G:A	rs2660	OAS1.10361.25.3		UKB SAIGE	Other abnormality of urination	-0.0674	0.0340006	0.0478	386856	1926
12:112919637:G:A	rs2660	OAS1.10361.25.3		UKB Neale v2	Rabeprazole sodium | treatment/medication code	-0.11764	0.0574273	0.0405088	361141	667
12:112919637:G:A	rs2660	OAS1.10361.25.3		UKB Neale v2	Frequent trouble falling or staying asleep during worst period of anxiety	0.0404153	0.0201521	0.0449116	35584	6455
12:112919637:G:A	rs2660	OAS1.10361.25.3		UKB Neale v2	Chronic lymphocytic | cancer code, self-reported	-0.190628	0.0963026	0.0477607	361141	237
12:112919637:G:A	rs2660	OAS1.10361.25.3		UKB Neale v2	Terazosin | treatment/medication code	-0.272982	0.131514	0.0379195	361141	127
12:112919637:G:A	rs2660	OAS1.10361.25.3		UKB Neale v2	Iron sulphate | treatment/medication code	-0.322953	0.113701	0.00450586	361141	170
12:112919637:G:A	rs2660	OAS1.10361.25.3		UKB Neale v2	Lymecycline | treatment/medication code	-0.259231	0.109598	0.0180145	361141	183
12:112919637:G:A	rs2660	OAS1.10361.25.3		UKB Neale v2	Speech-reception-threshold (srt) estimate (left)	-0.0181533	0.00839908	0.0306709	114811
12:112919637:G:A	rs2660	OAS1.10361.25.3	PMID:27863252	Astle WJ	Sum eosinophil basophil counts	-0.0113094	0.0037305	0.002433	171771
12:112919637:G:A	rs2660	OAS1.10361.25.3		UKB Neale v2	Pariet 10mg e/c tablet | treatment/medication code	-0.270001	0.0958965	0.00486898	361141	239
12:112919637:G:A	rs2660	OAS1.10361.25.3		UKB Neale v2	Minocycline | treatment/medication code	-0.292991	0.116842	0.0121542	361141	161
12:112919637:G:A	rs2660	OAS1.10361.25.3		UKB Neale v2	Co-enzyme q10/ubiquinone/bio-quinone/coenzyme q10 | treatment/medication code	-0.0834131	0.042392	0.0491031	361141	1226
12:112919637:G:A	rs2660	OAS1.10361.25.3		UKB SAIGE	Other dyspnea	0.118	0.0492009	0.0168	400745	912
12:112919637:G:A	rs2660	OAS1.10361.25.3		UKB Neale v2	Heart disease | illnesses of adopted mother	0.130682	0.0623507	0.036173	3004	697
12:112919637:G:A	rs2660	OAS1.10361.25.3		UKB SAIGE	Aneurysm of iliac artery	-0.438	0.151003	0.00369	400693	98
12:112919637:G:A	rs2660	OAS1.10361.25.3		UKB Neale v2	Thyroid goitre | non-cancer illness code, self-reported	0.15832	0.0795899	0.0466759	361141	347
12:112919637:G:A	rs2660	OAS1.10361.25.3		UKB Neale v2	Probable recurrent major depression (moderate) | bipolar and major depression status	0.0307937	0.0150072	0.0401766	86895	10902
12:112919637:G:A	rs2660	OAS1.10361.25.3		UKB Neale v2	Serc-8 tablet | treatment/medication code	-0.383488	0.141351	0.00666669	361141	110
12:112919637:G:A	rs2660	OAS1.10361.25.3		UKB Neale v2	Rarely/never | worked with paints, thinners or glues	0.0678991	0.0254767	0.00769587	90389	3593
12:112919637:G:A	rs2660	OAS1.10361.25.3		UKB Neale v2	Dihydrocodeine | treatment/medication code	-0.0918637	0.0413384	0.0262657	361141	1290
12:112919637:G:A	rs2660	OAS1.10361.25.3		UKB Neale v2	Retinal detachment | non-cancer illness code, self-reported	-0.0910821	0.0425097	0.0321415	361141	1219
12:112919637:G:A	rs2660	OAS1.10361.25.3		UKB SAIGE	Osteoarthrosis, localized, primary	-0.0392	0.0160003	0.0142	389591	9069
12:112919637:G:A	rs2660	OAS1.10361.25.3		UKB Neale v2	Vitamin b12 preparation | treatment/medication code	-0.0879384	0.0444124	0.047696	361141	1117
12:112919637:G:A	rs2660	OAS1.10361.25.3	PMID:27863252	Astle WJ	Sum basophil neutrophil counts	-0.00786844	0.00375162	0.03596	170143
12:112919637:G:A	rs2660	OAS1.10361.25.3		UKB Neale v2	Morphine | treatment/medication code	-0.200326	0.101595	0.048628	361141	213
12:112919637:G:A	rs2660	OAS1.10361.25.3		UKB SAIGE	Traumatic cataract	0.375	0.147003	0.011	388711	102
12:112919637:G:A	rs2660	OAS1.10361.25.3		UKB SAIGE	Macroglobulinemia	0.388	0.179003	0.0305	408299	69
12:112919637:G:A	rs2660	OAS1.10361.25.3		UKB Neale v2	Eosinophill count	-0.0071683	0.00184175	9.93946e-05	349856
12:112919637:G:A	rs2660	OAS1.10361.25.3	PMID:27863252	Astle WJ	Eosinophil counts	-0.0110119	0.00372607	0.003123	172275
12:112919637:G:A	rs2660	OAS1.10361.25.3		UKB Neale v2	Sarcoma/fibrosarcoma | cancer code, self-reported	-0.211251	0.10591	0.0460797	361141	196
12:112919637:G:A	rs2660	OAS1.10361.25.3		UKB SAIGE	Myoclonus	-0.309	0.152003	0.0427	395304	95
12:112919637:G:A	rs2660	OAS1.10361.25.3		UKB Neale v2	Dicloflex 25mg e/c tablet | treatment/medication code	0.15314	0.0715236	0.032263	361141	430
12:112919637:G:A	rs2660	OAS1.10361.25.3		UKB Neale v2	Losartan | treatment/medication code	-0.0559472	0.0260047	0.0314403	361141	3268
12:112919637:G:A	rs2660	OAS1.10361.25.3		UKB Neale v2	Number of jobs held	0.0128627	0.0037787	0.00066435	89866
12:112919637:G:A	rs2660	OAS1.10361.25.3		UKB SAIGE	Other disorders of eye	0.0542	0.0240004	0.0239	405155	3910
12:112919637:G:A	rs2660	OAS1.10361.25.3		UKB SAIGE	Perforation of tympanic membrane	0.0949	0.0460008	0.039	405932	1044
12:112919637:G:A	rs2660	OAS1.10361.25.3		UKB SAIGE	Rickets or osteomalacia	0.332	0.169003	0.049	406569	77
12:112919637:G:A	rs2660	OAS1.10361.25.3		UKB Neale v2	Doctor's advice | reason for reducing amount of alcohol drunk	0.0536912	0.0272172	0.0485286	134033	2990
12:112919637:G:A	rs2660	OAS1.10361.25.3		UKB Neale v2	Other type of coffee | coffee type	-0.0482379	0.0215895	0.0254601	283449	4791
12:112919637:G:A	rs2660	OAS1.10361.25.3		UKB Neale v2	Reductil 10mg capsule | treatment/medication code	-0.488905	0.137638	0.00038209	361141	116
12:112919637:G:A	rs2660	OAS1.10361.25.3		UKB SAIGE	Polyneuropathy due to drugs	-0.484	0.193004	0.0119	379415	60
12:112919637:G:A	rs2660	OAS1.10361.25.3		UKB SAIGE	Proliferative glomerulonephritis	0.331	0.166003	0.0467	397681	79
12:112919637:G:A	rs2660	OAS1.10361.25.3		UKB Neale v2	Manevac granules | treatment/medication code	-0.297354	0.129521	0.0216851	361141	131
12:112919637:G:A	rs2660	OAS1.10361.25.3		UKB Neale v2	Cycle | types of transport used (excluding work)	-0.0208277	0.00944536	0.0274467	359324	26059
12:112919637:G:A	rs2660	OAS1.10361.25.3		UKB Neale v2	Eosinophill percentage	-0.0109293	0.00460299	0.0175786	349861
12:112919637:G:A	rs2660	OAS1.10361.25.3		UKB Neale v2	Something else not mentioned | behavioural and miscellaneous addictions	0.14182	0.0706597	0.0447389	116746	441
12:112919637:G:A	rs2660	OAS1.10361.25.3		UKB Neale v2	Doctor diagnosed tuberculosis	0.133068	0.0668732	0.0466065	91787	489
12:112919637:G:A	rs2660	OAS1.10361.25.3		UKB Neale v2	Hip circumference	0.0797546	0.0225365	0.000401827	360521
12:112919637:G:A	rs2660	OAS1.10361.25.3	PMID:30053915	Scepanovic P	Anti-Epstein-Barr virus viral capsid antigen (VCA) IgG levels	0.0743816	0.022823	0.0011597	956
12:112919637:G:A	rs2660	OAS1.10361.25.3		UKB SAIGE	Dermatitis herpetiformis	0.397	0.196004	0.0435	402729	57
12:112919637:G:A	rs2660	OAS1.10361.25.3		UKB Neale v2	Pravastatin | treatment/medication code	-0.0772903	0.0357096	0.0304304	361141	1726
12:112919637:G:A	rs2660	OAS1.10361.25.3		UKB Neale v2	Felt hated by family member as a child	-0.00900604	0.00321983	0.00515791	117749
12:112919637:G:A	rs2660	OAS1.10361.25.3	PMID:29273806	Demenais F	Asthma	0.0337518	0.0133111	0.0112249	127669	19954
12:112919637:G:A	rs2660	OAS1.10361.25.3	PMID:21173776	de Moor MH	Neuroticism	-0.1978	0.1001	0.04811	17375
12:112919637:G:A	rs2660	OAS1.10361.25.3	PMID:30053915	Scepanovic P	Anti-hepatitis B virus core antigen (HBc) IgG levels	0.0568178	0.0236129	0.0164972	15
12:112919637:G:A	rs2660	OAS1.10361.25.3		UKB Neale v2	Methotrexate | treatment/medication code	-0.0808319	0.0339247	0.0171852	361141	1918
12:112919637:G:A	rs2660	OAS1.10361.25.3		UKB SAIGE	Chondrocalcinosis	0.155	0.0629012	0.0137	405758	560
12:112919637:G:A	rs2660	OAS1.10361.25.3		UKB Neale v2	Simvador 10mg tablet | treatment/medication code	-0.17526	0.0651685	0.00715877	361141	517
12:112919637:G:A	rs2660	OAS1.10361.25.3		UKB Neale v2	Ever had prolonged feelings of sadness or depression	0.0222587	0.00848289	0.00869157	117763	53389
12:112919637:G:A	rs2660	OAS1.10361.25.3		UKB Neale v2	Heart disease | illnesses of adopted siblings	-0.204378	0.097105	0.0354527	1860	202
12:112919637:G:A	rs2660	OAS1.10361.25.3		UKB Neale v2	Butter/spreadable butter | spread type	-0.0102542	0.00511823	0.0451227	360291	131190
12:112919637:G:A	rs2660	OAS1.10361.25.3		UKB SAIGE	Late effects of cerebrovascular disease	0.145	0.0419008	0.00053	400280	1263
12:112919637:G:A	rs2660	OAS1.10361.25.3		UKB Neale v2	20 to less-than-30 hours | work hours - lumped category	0.0266881	0.0129376	0.0391278	75177	15156
12:112919637:G:A	rs2660	OAS1.10361.25.3		UKB Neale v2	Arm fat percentage (right)	0.0654588	0.0184832	0.000397869	354760
12:112919637:G:A	rs2660	OAS1.10361.25.3		UKB Neale v2	Body fat percentage	0.0573487	0.0156539	0.000248777	354628
12:112919637:G:A	rs2660	OAS1.10361.25.3		UKB Neale v2	Recent feelings of foreboding	0.00617191	0.00237604	0.00939002	117474
12:112919637:G:A	rs2660	OAS1.10361.25.3		UKB Neale v2	Non-infective hepatitis | non-cancer illness code, self-reported	-0.172134	0.0766885	0.0247927	361141	374
12:112919637:G:A	rs2660	OAS1.10361.25.3		UKB Neale v2	Oramorph 10mg/5ml oral solution | treatment/medication code	-0.298541	0.138854	0.0315498	361141	114
12:112919637:G:A	rs2660	OAS1.10361.25.3		UKB Neale v2	Wholemilk | type milk consumed	0.0551352	0.0280668	0.0494813	51427	2934
12:112919637:G:A	rs2660	OAS1.10361.25.3	PMID:27863252	Astle WJ	White blood cell count	-0.0117984	0.00374665	0.001638	172435
12:112919637:G:A	rs2660	OAS1.10361.25.3		UKB Neale v2	Ursodeoxycholic acid | treatment/medication code	-0.315241	0.131035	0.0161365	361141	128
12:112919637:G:A	rs2660	OAS1.10361.25.3		UKB SAIGE	Other disorders of intestine	0.0456	0.0231004	0.048	391538	4200
12:112919637:G:A	rs2660	OAS1.10361.25.3		UKB Neale v2	Psoriasis | non-cancer illness code, self-reported	-0.0492946	0.0230233	0.0322657	361141	4192
12:112923312:C:T	rs10850097	OAS1.10361.25.3		UKB Neale v2	Waist circumference	0.0651613	0.0293304	0.0263089	360564
12:112923312:C:T	rs10850097	OAS1.10361.25.3		UKB Neale v2	Answered sexual history questions	-0.0186246	0.00887989	0.0359561	361015	29611
12:112923312:C:T	rs10850097	OAS1.10361.25.3		UKB Neale v2	Breast cancer | illnesses of mother	0.0181097	0.00920178	0.0490567	330828	27622
12:112923312:C:T	rs10850097	OAS1.10361.25.3		UKB Neale v2	Detrusitol 1mg tablet | treatment/medication code	-0.162086	0.0632095	0.0103386	361141	551
12:112923312:C:T	rs10850097	OAS1.10361.25.3		UKB Neale v2	Birth weight of first child	0.00576238	0.00292527	0.0488559	155202
12:112923312:C:T	rs10850097	OAS1.10361.25.3		UKB Neale v2	Naproxen | treatment/medication code	0.0824711	0.0307625	0.00734172	361141	2338
12:112923312:C:T	rs10850097	OAS1.10361.25.3		UKB Neale v2	Spells in hospital	-0.00531576	0.00243794	0.0292267	236484
12:112923312:C:T	rs10850097	OAS1.10361.25.3		UKB SAIGE	Cerebral edema and compression of brain	0.19	0.0925017	0.0402	395467	258
12:112923312:C:T	rs10850097	OAS1.10361.25.3		UKB Neale v2	Sulfasalazine | treatment/medication code	-0.16081	0.0557049	0.00389123	361141	710
12:112923312:C:T	rs10850097	OAS1.10361.25.3		UKB SAIGE	Obstructive chronic bronchitis	-0.0584	0.0290005	0.0437	378203	2698
12:112923312:C:T	rs10850097	OAS1.10361.25.3		UKB Neale v2	Reticulocyte count	-0.000313149	9.83365e-05	0.00145034	344729
12:112923312:C:T	rs10850097	OAS1.10361.25.3		UKB Neale v2	Age started smoking in current smokers	-0.146228	0.0509272	0.0040909	27291
12:112923312:C:T	rs10850097	OAS1.10361.25.3		UKB Neale v2	Mouth ulcers | mouth/teeth dental problems	-0.0165193	0.00814187	0.0424625	359841	36831
12:112923312:C:T	rs10850097	OAS1.10361.25.3		UKB Neale v2	Frequency of other exercises in last 4 weeks	-0.0122023	0.00443512	0.00593688	172505
12:112923312:C:T	rs10850097	OAS1.10361.25.3		UKB Neale v2	Calcium carbonate+colecalciferol 1.25g/5micrograms tablet | treatment/medication code	-0.272409	0.117615	0.0205512	361141	159
12:112923312:C:T	rs10850097	OAS1.10361.25.3		UKB SAIGE	Giant cell arteritis	0.159	0.0753014	0.0348	400983	388
12:112923312:C:T	rs10850097	OAS1.10361.25.3	PMID:27863252	Astle WJ	Plateletcrit	-0.0152258	0.00382331	6.823e-05	164339
12:112923312:C:T	rs10850097	OAS1.10361.25.3		UKB SAIGE	Sensorineural hearing loss	-0.14	0.0694013	0.0442	405018	456
12:112923312:C:T	rs10850097	OAS1.10361.25.3		UKB SAIGE	Non-hodgkins lymphoma	0.0881	0.0352006	0.0124	406259	1793
12:112923312:C:T	rs10850097	OAS1.10361.25.3	PMID:27989323	Ahola-Olli AV	Monokine induced by gamma interferon levels	-0.0743	0.0264	0.004865	3685
12:112923312:C:T	rs10850097	OAS1.10361.25.3		UKB Neale v2	Nasobec aqueous 50micrograms nasal spray | treatment/medication code	-0.253304	0.119144	0.0334985	361141	155
12:112923312:C:T	rs10850097	OAS1.10361.25.3		UKB Neale v2	Bisoprolol fumarate+hydrochlorothiazide 10mg/6.25mg tablet | treatment/medication code	0.271677	0.0969584	0.00507829	361141	234
12:112923312:C:T	rs10850097	OAS1.10361.25.3		UKB SAIGE	Malignant neoplasm of other and ill-defined sites within the digestive organs and peritoneum	0.0424	0.0201004	0.0355	398956	5584
12:112923312:C:T	rs10850097	OAS1.10361.25.3		UKB Neale v2	Magnesium citrate | treatment/medication code	-0.312044	0.126721	0.0137978	361141	137
12:112923312:C:T	rs10850097	OAS1.10361.25.3		UKB Neale v2	Risk taking	-0.0119362	0.0056223	0.0337508	348549	90500
12:112923312:C:T	rs10850097	OAS1.10361.25.3		UKB SAIGE	Valvular heart disease/ heart chambers	-0.23	0.0974018	0.0182	406398	233
12:112923312:C:T	rs10850097	OAS1.10361.25.3		UKB Neale v2	Recent worrying too much about different things	0.00683941	0.00289346	0.0180927	117567
12:112923312:C:T	rs10850097	OAS1.10361.25.3		UKB SAIGE	Tympanosclerosis and middle ear disease related to otitis media	0.245	0.0956018	0.0102	405129	241
12:112923312:C:T	rs10850097	OAS1.10361.25.3		UKB Neale v2	Sodium in urine	0.263751	0.105079	0.0120725	350061
12:112923312:C:T	rs10850097	OAS1.10361.25.3	PMID:29304378	Medina-Gomez C	Total body bone mineral density (age 30-45)	-0.0419	0.0161	0.009231	10062
12:112923312:C:T	rs10850097	OAS1.10361.25.3		UKB Neale v2	Weight	0.106837	0.0349045	0.00220744	354838
12:112923312:C:T	rs10850097	OAS1.10361.25.3		UKB SAIGE	Encephalopathy, not elsewhere classified	0.25	0.0963018	0.00952	395446	237
12:112923312:C:T	rs10850097	OAS1.10361.25.3		UKB Neale v2	Rectal cancer | cancer code, self-reported	0.211637	0.0899469	0.0186261	361141	272
12:112923312:C:T	rs10850097	OAS1.10361.25.3		UKB SAIGE	Secondary malignant neoplasm of liver	0.0697	0.0291005	0.0168	373242	2638
12:112923312:C:T	rs10850097	OAS1.10361.25.3	PMID:29942086	Savage JE	Intelligence	-0.00679853	0.00287829	0.01817	269867
12:112923312:C:T	rs10850097	OAS1.10361.25.3	PMID:27863252	Astle WJ	Platelet count	-0.0120975	0.00380943	0.001495	166066
12:112923312:C:T	rs10850097	OAS1.10361.25.3		UKB Neale v2	Hydroxycarbamide | treatment/medication code	-0.366513	0.116894	0.00171577	361141	161
12:112923312:C:T	rs10850097	OAS1.10361.25.3		UKB Neale v2	Zantac 75 tablet | treatment/medication code	-0.221898	0.104633	0.0339424	361141	201
12:112923312:C:T	rs10850097	OAS1.10361.25.3		UKB Neale v2	Body mass index (bmi)	0.0422306	0.0116783	0.000299058	359983
12:112923312:C:T	rs10850097	OAS1.10361.25.3		UKB SAIGE	Noninfectious disorders of lymphatic channels	-0.135	0.056101	0.0162	408961	705
12:112923312:C:T	rs10850097	OAS1.10361.25.3		UKB Neale v2	Leg pain when walking normally	-0.0433249	0.0186645	0.0202798	25305	10993
12:112923312:C:T	rs10850097	OAS1.10361.25.3		UKB Neale v2	Hearing aid user	0.0302783	0.0143795	0.0352328	219358	10942
12:112923312:C:T	rs10850097	OAS1.10361.25.3		UKB Neale v2	Viscotears liquid eye gel | treatment/medication code	-0.111949	0.0511603	0.0286525	361141	841
12:112923312:C:T	rs10850097	OAS1.10361.25.3		UKB Neale v2	Often | workplace very cold	0.0489846	0.0173118	0.0046616	90188	7881
12:112923312:C:T	rs10850097	OAS1.10361.25.3		UKB Neale v2	Semiskimmed | type milk consumed	-0.0317031	0.0134166	0.0181305	51427	19497
12:112923312:C:T	rs10850097	OAS1.10361.25.3		UKB Neale v2	Current employment status: Full or part-time student	-0.054824	0.027962	0.0499147	359931	2818
12:112923312:C:T	rs10850097	OAS1.10361.25.3		UKB SAIGE	Allergy/adverse effect of penicillin	-0.0269	0.0122002	0.0274	397887	16090
12:112923312:C:T	rs10850097	OAS1.10361.25.3		UKB Neale v2	Liquifilm tears 1.4% eye drops | treatment/medication code	-0.238287	0.120298	0.0476085	361141	152
12:112923312:C:T	rs10850097	OAS1.10361.25.3		UKB SAIGE	Dysphagia	-0.0368	0.0188003	0.0496	375757	6482
12:112923312:C:T	rs10850097	OAS1.10361.25.3		UKB Neale v2	Dentures | mouth/teeth dental problems	0.0149974	0.00630287	0.0173365	359841	60977
12:112923312:C:T	rs10850097	OAS1.10361.25.3		UKB SAIGE	Other disorders of ear	0.223	0.104002	0.0324	404764	202
12:112923312:C:T	rs10850097	OAS1.10361.25.3		UKB Neale v2	Indapamide | treatment/medication code	-0.0987538	0.0437352	0.0239446	361141	1152
12:112923312:C:T	rs10850097	OAS1.10361.25.3		UKB SAIGE	Dermatophytosis of nail	-0.342	0.170003	0.0449	406377	76
12:112923312:C:T	rs10850097	OAS1.10361.25.3		UKB Neale v2	Yes | hearing difficulty/problems	0.0118487	0.00562443	0.0351445	346635	90710
12:112923312:C:T	rs10850097	OAS1.10361.25.3		UKB SAIGE	Other diseases of lung	0.118	0.053201	0.0269	408961	781
12:112923312:C:T	rs10850097	OAS1.10361.25.3		UKB Neale v2	White blood cell (leukocyte) count	-0.0202769	0.00507809	6.525e-05	350470
12:112923312:C:T	rs10850097	OAS1.10361.25.3		UKB SAIGE	Primary biliary cirrhosis	-0.189	0.0931017	0.043	400309	254
12:112923312:C:T	rs10850097	OAS1.10361.25.3		UKB SAIGE	Cancer of larynx	0.217	0.0923017	0.0189	407079	258
12:112923312:C:T	rs10850097	OAS1.10361.25.3		UKB SAIGE	Intervertebral disc disorders	-0.0368	0.0159003	0.0201	401158	9241
12:112923312:C:T	rs10850097	OAS1.10361.25.3		UKB Neale v2	Platelet count	-0.673903	0.145116	3.42008e-06	350474
12:112923312:C:T	rs10850097	OAS1.10361.25.3		UKB Neale v2	Ever suffered mental distress preventing usual activities	0.0199485	0.00905951	0.0276684	116527	38681
12:112923312:C:T	rs10850097	OAS1.10361.25.3		UKB SAIGE	Osteoporosis, osteopenia and pathological fracture	-0.0443	0.0174003	0.0107	408961	7682
12:112923312:C:T	rs10850097	OAS1.10361.25.3		UKB SAIGE	Personal history of diseases of blood and blood-forming organs	-0.183	0.0871016	0.0359	401666	291
12:112923312:C:T	rs10850097	OAS1.10361.25.3		UKB SAIGE	Rheumatoid arthritis and other inflammatory polyarthropathies	-0.0526	0.0216004	0.0149	369964	4879
12:112923312:C:T	rs10850097	OAS1.10361.25.3		UKB Neale v2	None of the above | transport type for commuting to job workplace	-0.120469	0.0528276	0.0225815	190832	789
12:112923312:C:T	rs10850097	OAS1.10361.25.3		UKB Neale v2	Ever had bowel cancer screening	-0.0112678	0.00496045	0.0231128	355353	114475
12:112923312:C:T	rs10850097	OAS1.10361.25.3		UKB Neale v2	Triamcinolone | treatment/medication code	-0.265436	0.123177	0.0311664	361141	145
12:112923312:C:T	rs10850097	OAS1.10361.25.3		UKB Neale v2	Arm fat mass (right)	0.00511881	0.00152479	0.000787849	354736
12:112923312:C:T	rs10850097	OAS1.10361.25.3		UKB Neale v2	Trunk fat percentage	0.0649758	0.0178918	0.000281723	354619
12:112923312:C:T	rs10850097	OAS1.10361.25.3		UKB Neale v2	Often | worked with pesticides	0.128154	0.0634193	0.0433055	88019	524
12:112923312:C:T	rs10850097	OAS1.10361.25.3		UKB Neale v2	Leg predicted mass (left)	0.00614022	0.00281134	0.028956	354766
12:112923312:C:T	rs10850097	OAS1.10361.25.3		UKB Neale v2	Icd10: c71.9 brain, unspecified | underlying (primary) cause of death	-0.234256	0.0916352	0.0105908	9092	270
12:112923312:C:T	rs10850097	OAS1.10361.25.3		UKB SAIGE	Influenza	-0.167	0.0818015	0.0412	398866	328
12:112923312:C:T	rs10850097	OAS1.10361.25.3		UKB Neale v2	Psoriatic arthropathy | non-cancer illness code, self-reported	-0.118657	0.0556305	0.0329269	361141	712
12:112923312:C:T	rs10850097	OAS1.10361.25.3	PMID:29531354	Malik R	Ischemic stroke	0.0241	0.0106	0.02304	440328	34217
12:112923312:C:T	rs10850097	OAS1.10361.25.3		UKB Neale v2	Vitamin e | vitamin and/or mineral supplement use	-0.114067	0.0482102	0.0179807	51427	961
12:112923312:C:T	rs10850097	OAS1.10361.25.3		UKB Neale v2	Leg fat percentage (left)	0.0447565	0.0129529	0.000549663	354791
12:112923312:C:T	rs10850097	OAS1.10361.25.3		UKB Neale v2	Trunk fat mass	0.0458991	0.0127682	0.000324692	354597
12:112923312:C:T	rs10850097	OAS1.10361.25.3		UKB SAIGE	Open wound of ear	0.21	0.106002	0.0477	400622	196
12:112923312:C:T	rs10850097	OAS1.10361.25.3		UKB Neale v2	Ever seen an un-real vision	0.0487792	0.0245392	0.0468309	116787	3768
12:112923312:C:T	rs10850097	OAS1.10361.25.3		UKB Neale v2	Creon e/c granules in capsule | treatment/medication code	-0.248931	0.103857	0.0165338	361141	204
12:112923312:C:T	rs10850097	OAS1.10361.25.3		UKB SAIGE	Diaphragmatic hernia	-0.0247	0.00968018	0.0108	388743	27126
12:112923312:C:T	rs10850097	OAS1.10361.25.3	PMID:27863252	Astle WJ	Eosinophil percentage of granulocytes	-0.00774515	0.00374392	0.03857	170536
12:112923312:C:T	rs10850097	OAS1.10361.25.3		UKB Neale v2	Biscuit cereal (e.g. weetabix) | cereal type	0.0216209	0.00707367	0.00223903	299898	53310
12:112923312:C:T	rs10850097	OAS1.10361.25.3		UKB SAIGE	Crystal arthropathies	0.159	0.0601011	0.00829	405814	616
12:112923312:C:T	rs10850097	OAS1.10361.25.3		UKB Neale v2	Number of cigarettes previously smoked daily	-0.0104781	0.00436099	0.0162775	84456
12:112923312:C:T	rs10850097	OAS1.10361.25.3		UKB Neale v2	Leg fat mass (right)	0.0122779	0.00387967	0.00155273	354807
12:112923312:C:T	rs10850097	OAS1.10361.25.3		UKB Neale v2	Leg predicted mass (right)	0.00600977	0.00280498	0.0321514	354798
12:112923312:C:T	rs10850097	OAS1.10361.25.3		UKB SAIGE	Acute vascular insufficiency of intestine	-0.19	0.0914017	0.0377	400859	264
12:112923312:C:T	rs10850097	OAS1.10361.25.3		UKB SAIGE	Abnormal findings on mammogram or breast exam	-0.0741	0.0376007	0.0484	403326	1580
12:112923312:C:T	rs10850097	OAS1.10361.25.3		UKB SAIGE	Transient mental disorders due to conditions classified elsewhere	-0.417	0.135002	0.00206	402504	121
12:112923312:C:T	rs10850097	OAS1.10361.25.3		UKB Neale v2	Salmeterol | treatment/medication code	0.104735	0.0474478	0.0272853	361141	979
12:112923312:C:T	rs10850097	OAS1.10361.25.3		UKB SAIGE	Fracture of unspecified part of femur	-0.318	0.115002	0.00546	387933	168
12:112923312:C:T	rs10850097	OAS1.10361.25.3		UKB SAIGE	Strabismus (not specified as paralytic)	-0.0961	0.0490009	0.0499	402163	918
12:112923312:C:T	rs10850097	OAS1.10361.25.3		UKB Neale v2	Tetracycline | treatment/medication code	-0.328815	0.144748	0.023107	361141	105
12:112923312:C:T	rs10850097	OAS1.10361.25.3	PMID:27863252	Astle WJ	Myeloid white cell count	-0.00887124	0.00376741	0.01854	169219
12:112923312:C:T	rs10850097	OAS1.10361.25.3		UKB Neale v2	Social anxiety or social phobia | mental health problems ever diagnosed by a professional	-0.0927062	0.0387192	0.0166504	117716	1474
12:112923312:C:T	rs10850097	OAS1.10361.25.3		UKB Neale v2	No | hearing difficulty/problems	-0.0119844	0.00562266	0.0330497	346635	90797
12:112923312:C:T	rs10850097	OAS1.10361.25.3		UKB Neale v2	Death of a spouse or partner | illness, injury, bereavement, stress in last 2 years	-0.0561095	0.0199472	0.00490903	358836	5588
12:112923312:C:T	rs10850097	OAS1.10361.25.3		UKB Neale v2	Wrist | fractured bone site(s)	-0.0481178	0.0176047	0.00627083	359241	7200
12:112923312:C:T	rs10850097	OAS1.10361.25.3		UKB Neale v2	Heel bone mineral density (bmd) (right)	-0.00115489	0.000576478	0.0451407	114552
12:112923312:C:T	rs10850097	OAS1.10361.25.3		UKB Neale v2	Basophill count	-0.00497928	0.00210844	0.0181973	349856
12:112923312:C:T	rs10850097	OAS1.10361.25.3		UKB Neale v2	Lymphocyte count	-0.00812429	0.00281225	0.00386623	349856
12:112923312:C:T	rs10850097	OAS1.10361.25.3		UKB Neale v2	Arm fat-free mass (right)	0.00212786	0.00108563	0.0499929	354732
12:112923312:C:T	rs10850097	OAS1.10361.25.3		UKB Neale v2	Zirtek 10mg tablet | treatment/medication code	-0.480039	0.146858	0.00108022	361141	102
12:112923312:C:T	rs10850097	OAS1.10361.25.3		UKB Neale v2	P duration	0.50293	0.230765	0.0293233	10785
12:112923312:C:T	rs10850097	OAS1.10361.25.3		UKB Neale v2	Other therapeutic activities such as mindfulness, yoga or art classes | activities undertaken to treat depression	0.04277	0.0159133	0.00719489	117763	9199
12:112923312:C:T	rs10850097	OAS1.10361.25.3		UKB Neale v2	Use of sun/uv protection	-0.00457624	0.00213332	0.0319433	358559
12:112923312:C:T	rs10850097	OAS1.10361.25.3		UKB Neale v2	Leg fat-free mass (right)	0.00620471	0.00299151	0.0380702	354798
12:112923312:C:T	rs10850097	OAS1.10361.25.3		UKB Neale v2	Facial ageing	0.00286839	0.00126345	0.023191	330409
12:112923312:C:T	rs10850097	OAS1.10361.25.3		UKB Neale v2	Trospium | treatment/medication code	0.23864	0.109949	0.0299701	361141	182
12:112923312:C:T	rs10850097	OAS1.10361.25.3		UKB SAIGE	Renal failure nos	-0.0783	0.0395007	0.0476	399014	1412
12:112923312:C:T	rs10850097	OAS1.10361.25.3		UKB SAIGE	Superficial injury without mention of infection	-0.0482	0.0227004	0.0335	407884	4289
12:112923312:C:T	rs10850097	OAS1.10361.25.3		UKB Neale v2	Strontium product | treatment/medication code	-0.283901	0.134823	0.0352244	361141	121
12:112923312:C:T	rs10850097	OAS1.10361.25.3		UKB Neale v2	Leg fat percentage (right)	0.0446178	0.0136257	0.00105845	354811
12:112923312:C:T	rs10850097	OAS1.10361.25.3		UKB Neale v2	Arm fat mass (left)	0.00603705	0.00170394	0.000395671	354673
12:112923312:C:T	rs10850097	OAS1.10361.25.3		UKB SAIGE	Diseases of hair and hair follicles	-0.0459	0.0206004	0.0258	407701	5344
12:112923312:C:T	rs10850097	OAS1.10361.25.3		UKB Neale v2	Forced vital capacity (fvc), best measure	-0.00384567	0.00195135	0.0487506	272338
12:112923312:C:T	rs10850097	OAS1.10361.25.3		UKB Neale v2	Gastric/stomach ulcers | non-cancer illness code, self-reported	-0.0748428	0.0293788	0.0108483	361141	2562
12:112923312:C:T	rs10850097	OAS1.10361.25.3	PMID:27863252	Astle WJ	Sum neutrophil eosinophil counts	-0.00849804	0.00375229	0.02353	170384
12:112923312:C:T	rs10850097	OAS1.10361.25.3		UKB Neale v2	Doctor diagnosed chronic bronchitis	0.0938916	0.045909	0.0408374	91787	1048
12:112923312:C:T	rs10850097	OAS1.10361.25.3		UKB Neale v2	Icd10: c92.0 acute myeloid leukaemia | underlying (primary) cause of death	-0.348137	0.140495	0.013231	9092	113
12:112923312:C:T	rs10850097	OAS1.10361.25.3		UKB Neale v2	Angitil sr 90 m/r capsule | treatment/medication code	-0.282108	0.132658	0.0334515	361141	125
12:112923312:C:T	rs10850097	OAS1.10361.25.3		UKB Neale v2	Pioglitazone | treatment/medication code	0.138563	0.0544022	0.0108641	361141	744
12:112923312:C:T	rs10850097	OAS1.10361.25.3		UKB Neale v2	None of the above (group 1) | illnesses of adopted mother	-0.123658	0.0549584	0.0245196	2953	1320
12:112923312:C:T	rs10850097	OAS1.10361.25.3		UKB SAIGE	Constipation	-0.0377	0.0149003	0.0113	345225	10442
12:112923312:C:T	rs10850097	OAS1.10361.25.3		UKB Neale v2	Arm fat percentage (left)	0.0742659	0.0186562	6.87101e-05	354707
12:112923312:C:T	rs10850097	OAS1.10361.25.3		UKB Neale v2	Stopping prescribed medication | methods of self-harm used	0.216869	0.0907773	0.0168929	117733	267
12:112923312:C:T	rs10850097	OAS1.10361.25.3		UKB Neale v2	Number of depression episodes	0.0125484	0.00603701	0.0376618	45695
12:112923312:C:T	rs10850097	OAS1.10361.25.3		UKB Neale v2	Zanidip 10mg tablet | treatment/medication code	-0.351843	0.113092	0.00186356	361141	172
12:112923312:C:T	rs10850097	OAS1.10361.25.3		UKB Neale v2	Back pain | non-cancer illness code, self-reported	-0.0684198	0.0337827	0.0428345	361141	1937
12:112923312:C:T	rs10850097	OAS1.10361.25.3	PMID:27863252	Astle WJ	Lymphocyte counts	-0.0120805	0.00376628	0.001339	171643
12:112923312:C:T	rs10850097	OAS1.10361.25.3		UKB Neale v2	Neutrophill count	-0.0101301	0.00351595	0.00396215	349856
12:112923312:C:T	rs10850097	OAS1.10361.25.3		UKB SAIGE	Poisoning by antibiotics	-0.0248	0.0114002	0.0302	400227	18430
12:112923312:C:T	rs10850097	OAS1.10361.25.3		UKB Neale v2	Whole body fat mass	0.0801913	0.0229025	0.00046283	354244
12:112923312:C:T	rs10850097	OAS1.10361.25.3		UKB Neale v2	Childhood sunburn occasions	-0.00644067	0.00251768	0.0105228	269734
12:112923312:C:T	rs10850097	OAS1.10361.25.3		UKB Neale v2	Leg fat-free mass (left)	0.00653383	0.00299829	0.0293183	354771
12:112923312:C:T	rs10850097	OAS1.10361.25.3	PMID:27863252	Astle WJ	Eosinophil percentage of white cells	-0.00757708	0.00372689	0.04204	172378
12:112923312:C:T	rs10850097	OAS1.10361.25.3		UKB Neale v2	Morning/evening person (chronotype)	0.00568522	0.00241695	0.0186617	322488
12:112923312:C:T	rs10850097	OAS1.10361.25.3		UKB Neale v2	Age when last took cannabis	-0.31603	0.117914	0.0073631	25698
12:112923312:C:T	rs10850097	OAS1.10361.25.3		UKB Neale v2	Jaundice (unknown cause) | non-cancer illness code, self-reported	0.175037	0.0862296	0.0423635	361141	296
12:112923312:C:T	rs10850097	OAS1.10361.25.3		UKB SAIGE	Other disorders of middle ear and mastoid	0.108	0.051701	0.0372	405716	828
12:112923312:C:T	rs10850097	OAS1.10361.25.3		UKB Neale v2	Lichen planus | non-cancer illness code, self-reported	-0.332716	0.119134	0.00522486	361141	155
12:112923312:C:T	rs10850097	OAS1.10361.25.3		UKB Neale v2	Myositis/myopathy | non-cancer illness code, self-reported	-0.397749	0.123184	0.00124252	361141	145
12:112923312:C:T	rs10850097	OAS1.10361.25.3		UKB SAIGE	Delirium due to conditions classified elsewhere	-0.14	0.0580011	0.0158	403037	654
12:112923312:C:T	rs10850097	OAS1.10361.25.3		UKB Neale v2	Fresh fruit intake	-0.0037968	0.00144664	0.00867664	348284
12:112923312:C:T	rs10850097	OAS1.10361.25.3		UKB SAIGE	Other conditions of brain	0.158	0.0394007	6.19e-05	396635	1426
12:112923312:C:T	rs10850097	OAS1.10361.25.3		UKB Neale v2	Wants to stop smoking	0.0200266	0.0077404	0.00967881	27178
12:112923312:C:T	rs10850097	OAS1.10361.25.3		UKB Neale v2	Basal metabolic rate	4.45193	2.07809	0.0321683	354825
12:112923312:C:T	rs10850097	OAS1.10361.25.3		UKB Neale v2	Calcium carbonate+cholecalciferol 1.25g/200iu tablet | treatment/medication code	-0.144518	0.0628432	0.0214657	361141	557
12:112923312:C:T	rs10850097	OAS1.10361.25.3		UKB Neale v2	Gastrointestinal bleeding | non-cancer illness code, self-reported	-0.387318	0.12447	0.00185958	361141	142
12:112923312:C:T	rs10850097	OAS1.10361.25.3		UKB SAIGE	Nodular lymphoma	0.201	0.0772014	0.00908	404837	371
12:112923312:C:T	rs10850097	OAS1.10361.25.3	PMID:27863252	Astle WJ	Neutrophil count	-0.00764045	0.00374919	0.04156	170702
12:112923312:C:T	rs10850097	OAS1.10361.25.3		UKB Neale v2	Rheumatoid arthritis | non-cancer illness code, self-reported	-0.0548062	0.0235014	0.0196966	361141	4017
12:112923312:C:T	rs10850097	OAS1.10361.25.3		UKB Neale v2	White | bread type	0.015211	0.005638	0.00697619	348424	91452
12:112923312:C:T	rs10850097	OAS1.10361.25.3		UKB SAIGE	Osteoporosis nos	-0.043	0.0203004	0.0347	406901	5622
12:112923312:C:T	rs10850097	OAS1.10361.25.3		UKB Neale v2	Reticulocyte percentage	-0.00786057	0.00228976	0.000597184	344728
12:112923312:C:T	rs10850097	OAS1.10361.25.3		UKB Neale v2	Monocyte count	-0.00106931	0.000544305	0.0494673	349856
12:112923312:C:T	rs10850097	OAS1.10361.25.3		UKB SAIGE	Ulcer of esophagus	-0.0413	0.0209004	0.0485	374518	5243
12:112923312:C:T	rs10850097	OAS1.10361.25.3		UKB Neale v2	Celebrex 200mg capsule | treatment/medication code	-0.254634	0.125359	0.0422277	361141	140
12:112923312:C:T	rs10850097	OAS1.10361.25.3		UKB SAIGE	Ptosis of eyelid	0.104	0.0349006	0.00299	401140	1834
12:112923312:C:T	rs10850097	OAS1.10361.25.3		UKB SAIGE	Disorders of external ear	-0.0774	0.0391007	0.0477	408961	1451
12:112923312:C:T	rs10850097	OAS1.10361.25.3		UKB Neale v2	Fracture shaft of femur | non-cancer illness code, self-reported	-0.259632	0.102116	0.0110041	361141	211
12:112923312:C:T	rs10850097	OAS1.10361.25.3		UKB Neale v2	Sciatica | non-cancer illness code, self-reported	0.0787988	0.0255517	0.00204285	361141	3400
12:112923312:C:T	rs10850097	OAS1.10361.25.3		UKB Neale v2	Vascalpha 5mg m/r tablet | treatment/medication code	-0.44031	0.13483	0.00109193	361141	121
12:112923312:C:T	rs10850097	OAS1.10361.25.3		UKB SAIGE	Pathologic fracture	-0.152	0.0655012	0.0201	401793	514
12:112923312:C:T	rs10850097	OAS1.10361.25.3		UKB Neale v2	Starchy food consumers	0.029073	0.0146763	0.0475988	51427	13706
12:112923312:C:T	rs10850097	OAS1.10361.25.3		UKB Neale v2	Body mass index (bmi)	0.0421192	0.0117241	0.000327538	354831
12:112923312:C:T	rs10850097	OAS1.10361.25.3		UKB SAIGE	Other conditions of brain, nos	0.25	0.0757014	0.000947	395595	386
12:112923312:C:T	rs10850097	OAS1.10361.25.3		UKB SAIGE	Abnormal heart sounds	0.0927	0.0460008	0.0439	403470	1049
12:112923312:C:T	rs10850097	OAS1.10361.25.3		UKB Neale v2	Home location at assessment - east co-ordinate (rounded)	-327.658	153.687	0.0330093	357793
12:112923312:C:T	rs10850097	OAS1.10361.25.3		UKB SAIGE	Upper gastrointestinal congenital anomalies	0.182	0.0812015	0.0253	407065	335
12:112923312:C:T	rs10850097	OAS1.10361.25.3	PMID:27989323	Ahola-Olli AV	Interferon gamma-induced protein 10 levels	-0.0568	0.0264	0.0316	3685
12:112923312:C:T	rs10850097	OAS1.10361.25.3		UKB Neale v2	Number of days/week of vigorous physical activity 10+ minutes	-0.0141687	0.00488493	0.00372612	344084
12:112923312:C:T	rs10850097	OAS1.10361.25.3		UKB Neale v2	Weight	0.106457	0.0347569	0.00219227	360116
12:112923312:C:T	rs10850097	OAS1.10361.25.3		UKB Neale v2	Platelet crit	-0.00063646	0.000116594	4.79783e-08	350471
12:112923312:C:T	rs10850097	OAS1.10361.25.3		UKB Neale v2	Gamolenic acid | treatment/medication code	-0.292151	0.140775	0.0379559	361141	111
12:112923312:C:T	rs10850097	OAS1.10361.25.3		UKB Neale v2	Cholecystitis | non-cancer illness code, self-reported	-0.227752	0.0760091	0.00273185	361141	381
12:112923312:C:T	rs10850097	OAS1.10361.25.3		UKB Neale v2	Leg fat mass (left)	0.0122542	0.00378633	0.00121042	354788
12:112923312:C:T	rs10850097	OAS1.10361.25.3		UKB SAIGE	Displacement of intervertebral disc	-0.158	0.0653012	0.0153	392430	513
12:112923312:C:T	rs10850097	OAS1.10361.25.3		UKB Neale v2	Anxiety, nerves or generalized anxiety disorder | mental health problems ever diagnosed by a professional	0.0304928	0.0123091	0.0132389	117751	16730
12:112923312:C:T	rs10850097	OAS1.10361.25.3		UKB Neale v2	6mm strong meridian angle (right)	0.662827	0.252884	0.00876745	66256
12:112923312:C:T	rs10850097	OAS1.10361.25.3		UKB Neale v2	High blood pressure | illnesses of mother	-0.0116409	0.00551929	0.0349299	333048	101688
12:112923312:C:T	rs10850097	OAS1.10361.25.3	PMID:27863252	Astle WJ	Granulocyte count	-0.00883762	0.00375836	0.0187	169822
12:112923312:C:T	rs10850097	OAS1.10361.25.3		UKB Neale v2	For short-sightedness, i.e. only or mainly for distance viewing such as driving, cinema etc (called 'myopia') | reason for glasses/contact lenses	-0.0195593	0.00903358	0.0303715	360677	29318
12:112923312:C:T	rs10850097	OAS1.10361.25.3		UKB Neale v2	Plaquenil 200mg tablet | treatment/medication code	-0.262098	0.115826	0.0236426	361141	164
12:112923312:C:T	rs10850097	OAS1.10361.25.3		UKB SAIGE	Hepatomegaly	-0.193	0.0861016	0.025	400352	297
12:112923312:C:T	rs10850097	OAS1.10361.25.3		UKB Neale v2	Solpadol caplet | treatment/medication code	-0.18254	0.085657	0.0330821	361141	300
12:112923312:C:T	rs10850097	OAS1.10361.25.3		UKB Neale v2	Usual walking pace	-0.00561599	0.00148614	0.000157539	358974
12:112923312:C:T	rs10850097	OAS1.10361.25.3		UKB Neale v2	Rarely/never | workplace full of chemical or other fumes	0.0502263	0.0217513	0.020937	90344	4986
12:112923312:C:T	rs10850097	OAS1.10361.25.3		UKB Neale v2	Not performed - other reason | oct measured (right)	0.0714062	0.0321532	0.0263653	54608	2207
12:112923312:C:T	rs10850097	OAS1.10361.25.3		UKB Neale v2	Victim of sexual assault	0.0263029	0.0119961	0.0283338	116671	17230
12:112923312:C:T	rs10850097	OAS1.10361.25.3		UKB SAIGE	Keratoderma, acquired	-0.478	0.160003	0.00276	403962	87
12:112923312:C:T	rs10850097	OAS1.10361.25.3		UKB Neale v2	Fracture skull / head | non-cancer illness code, self-reported	-0.181587	0.0906148	0.0450738	361141	268
12:112923312:C:T	rs10850097	OAS1.10361.25.3		UKB Neale v2	Other abdominal problem | non-cancer illness code, self-reported	0.156904	0.0722334	0.0298394	361141	422
12:112923312:C:T	rs10850097	OAS1.10361.25.3		UKB SAIGE	Other hypertrophic cardiomyopathy	0.284	0.116002	0.0146	405942	163
12:112923312:C:T	rs10850097	OAS1.10361.25.3		UKB Neale v2	Used an inhaler for chest within last hour	-0.0708004	0.0302081	0.0190893	331625	2424
12:112923312:C:T	rs10850097	OAS1.10361.25.3		UKB SAIGE	Other abnormality of urination	-0.0721	0.0341006	0.0342	386856	1926
12:112923312:C:T	rs10850097	OAS1.10361.25.3		UKB Neale v2	Rabeprazole sodium | treatment/medication code	-0.119369	0.057455	0.0377414	361141	667
12:112923312:C:T	rs10850097	OAS1.10361.25.3		UKB Neale v2	Frequent trouble falling or staying asleep during worst period of anxiety	0.0408943	0.0201588	0.0425014	35584	6455
12:112923312:C:T	rs10850097	OAS1.10361.25.3		UKB Neale v2	Chronic lymphocytic | cancer code, self-reported	-0.201812	0.0963487	0.0362034	361141	237
12:112923312:C:T	rs10850097	OAS1.10361.25.3		UKB Neale v2	Terazosin | treatment/medication code	-0.27099	0.131577	0.0394378	361141	127
12:112923312:C:T	rs10850097	OAS1.10361.25.3		UKB Neale v2	Iron sulphate | treatment/medication code	-0.321346	0.113756	0.00472943	361141	170
12:112923312:C:T	rs10850097	OAS1.10361.25.3		UKB Neale v2	Lymecycline | treatment/medication code	-0.25811	0.10965	0.0185744	361141	183
12:112923312:C:T	rs10850097	OAS1.10361.25.3		UKB Neale v2	Speech-reception-threshold (srt) estimate (left)	-0.0174496	0.00840427	0.0378702	114811
12:112923312:C:T	rs10850097	OAS1.10361.25.3	PMID:27863252	Astle WJ	Sum eosinophil basophil counts	-0.0117243	0.00373468	0.001693	171771
12:112923312:C:T	rs10850097	OAS1.10361.25.3		UKB Neale v2	Pariet 10mg e/c tablet | treatment/medication code	-0.269464	0.0959424	0.00497523	361141	239
12:112923312:C:T	rs10850097	OAS1.10361.25.3		UKB Neale v2	Minocycline | treatment/medication code	-0.31723	0.116898	0.00665201	361141	161
12:112923312:C:T	rs10850097	OAS1.10361.25.3		UKB Neale v2	Co-enzyme q10/ubiquinone/bio-quinone/coenzyme q10 | treatment/medication code	-0.0849175	0.0424121	0.04526	361141	1226
12:112923312:C:T	rs10850097	OAS1.10361.25.3		UKB SAIGE	Other dyspnea	0.113	0.0492009	0.0217	400745	912
12:112923312:C:T	rs10850097	OAS1.10361.25.3		UKB Neale v2	Heart disease | illnesses of adopted mother	0.131009	0.0622615	0.0354478	3004	697
12:112923312:C:T	rs10850097	OAS1.10361.25.3		UKB Neale v2	Amlodipine | treatment/medication code	0.0255743	0.012406	0.0392581	361141	14588
12:112923312:C:T	rs10850097	OAS1.10361.25.3		UKB SAIGE	Aneurysm of iliac artery	-0.438	0.151003	0.00367	400693	98
12:112923312:C:T	rs10850097	OAS1.10361.25.3		UKB Neale v2	Probable recurrent major depression (moderate) | bipolar and major depression status	0.0308026	0.0150173	0.040254	86895	10902
12:112923312:C:T	rs10850097	OAS1.10361.25.3		UKB Neale v2	Serc-8 tablet | treatment/medication code	-0.402775	0.141419	0.00439751	361141	110
12:112923312:C:T	rs10850097	OAS1.10361.25.3		UKB Neale v2	Rarely/never | worked with paints, thinners or glues	0.0656306	0.0254967	0.0100509	90389	3593
12:112923312:C:T	rs10850097	OAS1.10361.25.3		UKB Neale v2	Dihydrocodeine | treatment/medication code	-0.0942451	0.0413583	0.0226802	361141	1290
12:112923312:C:T	rs10850097	OAS1.10361.25.3		UKB Neale v2	Retinal detachment | non-cancer illness code, self-reported	-0.0965339	0.04253	0.0232189	361141	1219
12:112923312:C:T	rs10850097	OAS1.10361.25.3		UKB SAIGE	Osteoarthrosis, localized, primary	-0.04	0.0160003	0.0125	389591	9069
12:112923312:C:T	rs10850097	OAS1.10361.25.3		UKB Neale v2	Vitamin b12 preparation | treatment/medication code	-0.0880266	0.0444338	0.0475795	361141	1117
12:112923312:C:T	rs10850097	OAS1.10361.25.3	PMID:27863252	Astle WJ	Sum basophil neutrophil counts	-0.00782987	0.0037559	0.0371	170143
12:112923312:C:T	rs10850097	OAS1.10361.25.3		UKB SAIGE	Traumatic cataract	0.377	0.147003	0.0105	388711	102
12:112923312:C:T	rs10850097	OAS1.10361.25.3		UKB SAIGE	Macroglobulinemia	0.39	0.179003	0.0295	408299	69
12:112923312:C:T	rs10850097	OAS1.10361.25.3		UKB Neale v2	Eosinophill count	-0.00714268	0.00184263	0.000106051	349856
12:112923312:C:T	rs10850097	OAS1.10361.25.3	PMID:27863252	Astle WJ	Eosinophil counts	-0.0116075	0.00373024	0.00186	172275
12:112923312:C:T	rs10850097	OAS1.10361.25.3		UKB Neale v2	Sarcoma/fibrosarcoma | cancer code, self-reported	-0.209161	0.10596	0.0483833	361141	196
12:112923312:C:T	rs10850097	OAS1.10361.25.3		UKB SAIGE	Myoclonus	-0.319	0.152003	0.0362	395304	95
12:112923312:C:T	rs10850097	OAS1.10361.25.3		UKB Neale v2	Dicloflex 25mg e/c tablet | treatment/medication code	0.149987	0.0715579	0.036078	361141	430
12:112923312:C:T	rs10850097	OAS1.10361.25.3		UKB Neale v2	Losartan | treatment/medication code	-0.0513883	0.0260172	0.0482457	361141	3268
12:112923312:C:T	rs10850097	OAS1.10361.25.3		UKB Neale v2	Number of jobs held	0.0129179	0.00378157	0.000635751	89866
12:112923312:C:T	rs10850097	OAS1.10361.25.3		UKB SAIGE	Other disorders of eye	0.0551	0.0240004	0.0218	405155	3910
12:112923312:C:T	rs10850097	OAS1.10361.25.3		UKB SAIGE	Perforation of tympanic membrane	0.0902	0.0460008	0.0499	405932	1044
12:112923312:C:T	rs10850097	OAS1.10361.25.3		UKB Neale v2	Doctor's advice | reason for reducing amount of alcohol drunk	0.0569791	0.0272303	0.0363935	134033	2990
12:112923312:C:T	rs10850097	OAS1.10361.25.3		UKB Neale v2	Other type of coffee | coffee type	-0.0466869	0.0215991	0.0306525	283449	4791
12:112923312:C:T	rs10850097	OAS1.10361.25.3		UKB Neale v2	Reductil 10mg capsule | treatment/medication code	-0.487105	0.137704	0.000404113	361141	116
12:112923312:C:T	rs10850097	OAS1.10361.25.3		UKB SAIGE	Polyneuropathy due to drugs	-0.482	0.193004	0.0123	379415	60
12:112923312:C:T	rs10850097	OAS1.10361.25.3		UKB SAIGE	Proliferative glomerulonephritis	0.333	0.166003	0.0456	397681	79
12:112923312:C:T	rs10850097	OAS1.10361.25.3		UKB Neale v2	Manevac granules | treatment/medication code	-0.295857	0.129583	0.022419	361141	131
12:112923312:C:T	rs10850097	OAS1.10361.25.3		UKB Neale v2	Cycle | types of transport used (excluding work)	-0.0205695	0.00944979	0.0295003	359324	26059
12:112923312:C:T	rs10850097	OAS1.10361.25.3		UKB Neale v2	Eosinophill percentage	-0.0112804	0.00460517	0.0143059	349861
12:112923312:C:T	rs10850097	OAS1.10361.25.3		UKB Neale v2	Something else not mentioned | behavioural and miscellaneous addictions	0.143888	0.0706985	0.041826	116746	441
12:112923312:C:T	rs10850097	OAS1.10361.25.3		UKB Neale v2	Hip circumference	0.0793539	0.0225472	0.000432497	360521
12:112923312:C:T	rs10850097	OAS1.10361.25.3	PMID:30053915	Scepanovic P	Anti-Epstein-Barr virus viral capsid antigen (VCA) IgG levels	0.0769935	0.0220034	0.000488484	956
12:112923312:C:T	rs10850097	OAS1.10361.25.3		UKB SAIGE	Dermatitis herpetiformis	0.398	0.197004	0.0427	402729	57
12:112923312:C:T	rs10850097	OAS1.10361.25.3		UKB Neale v2	Pravastatin | treatment/medication code	-0.0741422	0.0357268	0.0379597	361141	1726
12:112923312:C:T	rs10850097	OAS1.10361.25.3	PMID:30053915	Scepanovic P	Anti-Helicobacter pylori IgG levels	0.0707885	0.0338928	0.0382883	175
12:112923312:C:T	rs10850097	OAS1.10361.25.3		UKB Neale v2	Felt hated by family member as a child	-0.00897323	0.00322177	0.00535064	117749
12:112923312:C:T	rs10850097	OAS1.10361.25.3	PMID:29273806	Demenais F	Asthma	0.0340614	0.0133556	0.0107613	127669	19954
12:112923312:C:T	rs10850097	OAS1.10361.25.3	PMID:21173776	de Moor MH	Neuroticism	-0.205	0.1001	0.04054	17375
12:112923312:C:T	rs10850097	OAS1.10361.25.3		UKB Neale v2	Methotrexate | treatment/medication code	-0.0811477	0.033941	0.0168079	361141	1918
12:112923312:C:T	rs10850097	OAS1.10361.25.3		UKB SAIGE	Chondrocalcinosis	0.157	0.0629012	0.0127	405758	560
12:112923312:C:T	rs10850097	OAS1.10361.25.3		UKB Neale v2	Simvador 10mg tablet | treatment/medication code	-0.172261	0.0651997	0.00823956	361141	517
12:112923312:C:T	rs10850097	OAS1.10361.25.3		UKB Neale v2	Ever had prolonged feelings of sadness or depression	0.021966	0.00848793	0.00965595	117763	53389
12:112923312:C:T	rs10850097	OAS1.10361.25.3		UKB Neale v2	Heart disease | illnesses of adopted siblings	-0.203773	0.0969721	0.0357465	1860	202
12:112923312:C:T	rs10850097	OAS1.10361.25.3		UKB Neale v2	Butter/spreadable butter | spread type	-0.0103781	0.00512065	0.0426887	360291	131190
12:112923312:C:T	rs10850097	OAS1.10361.25.3		UKB SAIGE	Late effects of cerebrovascular disease	0.143	0.0419008	0.000628	400280	1263
12:112923312:C:T	rs10850097	OAS1.10361.25.3		UKB Neale v2	20 to less-than-30 hours | work hours - lumped category	0.0273893	0.0129461	0.034376	75177	15156
12:112923312:C:T	rs10850097	OAS1.10361.25.3		UKB Neale v2	Arm fat percentage (right)	0.0665412	0.0184919	0.000320217	354760
12:112923312:C:T	rs10850097	OAS1.10361.25.3		UKB Neale v2	Body fat percentage	0.0578399	0.0156611	0.000221472	354628
12:112923312:C:T	rs10850097	OAS1.10361.25.3		UKB Neale v2	Recent feelings of foreboding	0.00631013	0.0023775	0.0079531	117474
12:112923312:C:T	rs10850097	OAS1.10361.25.3		UKB Neale v2	Non-infective hepatitis | non-cancer illness code, self-reported	-0.16459	0.0767253	0.0319352	361141	374
12:112923312:C:T	rs10850097	OAS1.10361.25.3		UKB Neale v2	Oramorph 10mg/5ml oral solution | treatment/medication code	-0.293387	0.13892	0.0346913	361141	114
12:112923312:C:T	rs10850097	OAS1.10361.25.3		UKB Neale v2	Wholemilk | type milk consumed	0.0551761	0.0280862	0.0494702	51427	2934
12:112923312:C:T	rs10850097	OAS1.10361.25.3		UKB Neale v2	Epilepsy | non-cancer illness code, self-reported	-0.0542868	0.0271208	0.0453182	361141	3015
12:112923312:C:T	rs10850097	OAS1.10361.25.3	PMID:27863252	Astle WJ	White blood cell count	-0.0116108	0.00375083	0.001965	172435
[truncated: 1,778 more rows]
