# Supplementary material for: A proteome-wide genetic investigation identifies several SARS-CoV-2-exploited host targets of clinical relevance
Source: eLife. 2021 Aug 17;10:e69719. doi: 10.7554/eLife.69719 (PMC8457835; doi:10.7554/eLife.69719)
Supplement: Supplementary file 9. [file elife-69719-supp9.xlsx]

## Sheet: Sheet1
Key to Table 1 - Summary of proteins reported in our study and the different sources of evidence supporting their prioritization.
Column	Description
Protein	HGNC-approved gene symbol of protein
Supported by multi-instrument pan-MR	If there is evidence from multi-instrument pan-MR that the protein is associated with COVID-19 risk, the columns report the number of cis-acting (within 1 Mbp of transcription start site) or trans-acting (outside the cis-window) SNPs supporting the association of genetically predicted circulating protein with COVID-19 risk. If an MR association constitutes trans-acting SNPs, we also report the mo…
- No. of cis-acting SNPs	Number of cis-acting SNPs
- No. of trans-acting SNPs	Number of trans-acting SNPs
- trans-acting gene(s)	Most likely causal gene(s) for trans-acting SNPs
Supported by GC & single-SNP cis-MR	If there is evidence of a shared genetic signal between protein and a COVID-19 outcome, is there evidence of association of genetically predicted protein using the single-SNP that represents the shared genetic signal and COVID-19 risk?
Supported by multi-instrument cis-MR	Is there evidence of association of genetically predicted protein (where the associations were based on miltiple cis-acting SNPs) with COVID-19 risk?
Experimental support	Which protein was experimentally tested and had experimental support for being linked to COVID-19 risk? (In our study, this was only CD209)
Existing drugs	Are there drugs that target the protein?
Previously reported	Was the protein previously reported to be associated with COVID-19 risk?
